# Supplementary material
Source: PubMed Central journal article supplement (PMC2972694)
Supplement: supp_ddq392_ddq392supp_table1.pdf [file supp_ddq392_ddq392supp_table1.pdf]

Supplementary Table 1: eSNP identified in peripheral blood CD4+ lymphocytes

| Symbol | Lumi nuID          | SNP        | Population-based association |                           |                      | Family-based association |                               |        | Transcript abundance (log2 scale) |                    |         |                 |        |                 |         | SNP mapping under probe |
|--------|--------------------|------------|------------------------------|---------------------------|----------------------|--------------------------|-------------------------------|--------|-----------------------------------|--------------------|---------|-----------------|--------|-----------------|---------|-------------------------|
|        |                    |            | p-value (-log10)             | p-value (-log10), GC adj. | % Variance Explained | p-value (-log10)         | Distance from transcript (kb) | MAF    | Mean                              | Standard Deviation | Minimum | 25th percentile | Median | 75th percentile | Maximum |                         |
| 3-Mar  | TdL92zo9.qsf6yXi60 | rs2055873  | 5.78                         | 5.52                      | 0.112                | 1.92                     | -4.57                         | 0.3175 | 7.835                             | 0.211              | 7.366   | 7.687           | 7.827  | 7.962           | 8.615   |                         |
| 3-Mar  | TdL92zo9.qsf6yXi60 | rs4836300  | 8.63                         | 8.24                      | -0.172               | 3.49                     | 9.31                          | 0.495  | 7.835                             | 0.211              | 7.366   | 7.687           | 7.827  | 7.962           | 8.615   |                         |
| 3-Mar  | xL74krW4PtJme6mHu4 | rs4836300  | 4.37                         | 4.18                      | -0.08                | 0.76                     | 9.31                          | 0.495  | 7.307                             | 0.146              | 7.101   | 7.197           | 7.276  | 7.385           | 7.854   |                         |
| 3-Mar  | TdL92zo9.qsf6yXi60 | rs11956061 | 9.46                         | 9.03                      | -0.185               | 3.98                     | 40.35                         | 0.4675 | 7.835                             | 0.211              | 7.366   | 7.687           | 7.827  | 7.962           | 8.615   |                         |
| 3-Mar  | xL74krW4PtJme6mHu4 | rs11956061 | 5.46                         | 5.22                      | -0.1                 | 0.89                     | 40.35                         | 0.4675 | 7.307                             | 0.146              | 7.101   | 7.197           | 7.276  | 7.385           | 7.854   |                         |
| 3-Mar  | TdL92zo9.qsf6yXi60 | rs10491285 | 10.8                         | 10.30                     | 0.212                | 3.95                     | -26.16                        | 0.3425 | 7.835                             | 0.211              | 7.366   | 7.687           | 7.827  | 7.962           | 8.615   |                         |
| 3-Mar  | TdL92zo9.qsf6yXi60 | rs12515192 | 9.93                         | 9.47                      | -0.193               | 3.64                     | -19.3                         | 0.4625 | 7.835                             | 0.211              | 7.366   | 7.687           | 7.827  | 7.962           | 8.615   |                         |
| 3-Mar  | xL74krW4PtJme6mHu4 | rs12515192 | 5.25                         | 5.02                      | -0.096               | 0.52                     | -19.3                         | 0.4625 | 7.307                             | 0.146              | 7.101   | 7.197           | 7.276  | 7.385           | 7.854   |                         |
| 3-Mar  | TdL92zo9.qsf6yXi60 | rs9327428  | 10.24                        | 9.77                      | 0.202                | 3.75                     | -18.71                        | 0.4425 | 7.835                             | 0.211              | 7.366   | 7.687           | 7.827  | 7.962           | 8.615   |                         |
| 3-Mar  | xL74krW4PtJme6mHu4 | rs9327428  | 4.52                         | 4.33                      | 0.083                | 0.41                     | -18.71                        | 0.4425 | 7.307                             | 0.146              | 7.101   | 7.197           | 7.276  | 7.385           | 7.854   |                         |
| 3-Mar  | TdL92zo9.qsf6yXi60 | rs2240800  | 5.5                          | 5.26                      | -0.109               | 2.49                     | 21.44                         | 0.1725 | 7.835                             | 0.211              | 7.366   | 7.687           | 7.827  | 7.962           | 8.615   |                         |
| 6-Mar  | i.wATazaiea6daWvtc | rs2567564  | 3.56                         | 3.41                      | -0.067               | 0.53                     | 40.76                         | 0.0975 | 10.186                            | 0.673              | 8.807   | 9.661           | 10.078 | 10.596          | 12.256  |                         |
| AASDH  | Hekkk3HjqAu6N_g3SI | rs13124696 | 4.08                         | 3.91                      | 0.08                 | 2.79                     | 9.91                          | 0.455  | 8.911                             | 0.344              | 7.323   | 8.673           | 8.941  | 9.175           | 9.705   |                         |
| AASDH  | Hekkk3HjqAu6N_g3SI | rs3796544  | 4.47                         | 4.28                      | 0.09                 | 2.65                     | 11.22                         | 0.3875 | 8.911                             | 0.344              | 7.323   | 8.673           | 8.941  | 9.175           | 9.705   |                         |
| AASDH  | Hekkk3HjqAu6N_g3SI | rs13102012 | 4.22                         | 4.04                      | -0.083               | 2.71                     | 20.06                         | 0.4525 | 8.911                             | 0.344              | 7.323   | 8.673           | 8.941  | 9.175           | 9.705   |                         |
| AASDH  | Hekkk3HjqAu6N_g3SI | rs13150967 | 4.47                         | 4.28                      | 0.09                 | 2.65                     | -7.62                         | 0.3875 | 8.911                             | 0.344              | 7.323   | 8.673           | 8.941  | 9.175           | 9.705   |                         |
| AASDH  | Hekkk3HjqAu6N_g3SI | rs13123301 | 4.81                         | 4.60                      | -0.098               | 1.69                     | 3.59                          | 0.3231 | 8.911                             | 0.344              | 7.323   | 8.673           | 8.941  | 9.175           | 9.705   |                         |
| AASS   | EW6rxUJU6SUA75_OuA | rs3213699  | 3.31                         | 3.17                      | -0.061               | 1.37                     | 9.77                          | 0.1075 | 7.244                             | 0.089              | 7.107   | 7.179           | 7.228  | 7.304           | 7.698   |                         |
| AASS   | EW6rxUJU6SUA75_OuA | rs2268075  | 3.75                         | 3.59                      | 0.07                 | 1.76                     | 13.31                         | 0.095  | 7.244                             | 0.089              | 7.107   | 7.179           | 7.228  | 7.304           | 7.698   |                         |
| ABAT   | TB0kgnrABOqJWihKec | rs1730958  | 3.48                         | 3.36                      | -0.065               | 1.45                     | 2.74                          | 0.2175 | 7.633                             | 0.139              | 7.27    | 7.55            | 7.639  | 7.715           | 8.259   |                         |
| ABAT   | TB0kgnrABOqJWihKec | rs1273357  | 3.93                         | 3.74                      | -0.075               | 1.74                     | 16.4                          | 0.185  | 7.633                             | 0.139              | 7.27    | 7.55            | 7.639  | 7.715           | 8.259   |                         |
| ABC1   | ctKvvoE3he5NSiWKLQ | rs7223281  | 5.54                         | 5.29                      | -0.114               | 1.22                     | 16.16                         | 0.095  | 8.362                             | 0.298              | 7.646   | 8.132           | 8.333  | 8.558           | 9.269   |                         |
| ABCC4  | 0r_C6LdOF3SDCu0XV4 | rs1557069  | 3.43                         | 3.28                      | 0.067                | 0.88                     | -114.39                       | 0.2    | 8.254                             | 0.191              | 7.67    | 8.116           | 8.253  | 8.386           | 9.099   |                         |
| ABCC4  | 0r_C6LdOF3SDCu0XV4 | rs2487566  | 4.64                         | 4.44                      | -0.093               | 0.72                     | -108.41                       | 0.48   | 8.254                             | 0.191              | 7.67    | 8.116           | 8.253  | 8.386           | 9.099   |                         |
| ABCC4  | 0r_C6LdOF3SDCu0XV4 | rs4148482  | 3.83                         | 3.67                      | -0.077               | 1.33                     | -108.05                       | 0.309  | 8.254                             | 0.191              | 7.67    | 8.116           | 8.253  | 8.386           | 9.099   |                         |
| ABCF2  | E.sBhu.iSem7inlaek | rs3800794  | 3.7                          | 3.55                      | 0.073                | 1.02                     | -7.78                         | 0.0875 | 8.091                             | 0.289              | 7.432   | 7.866           | 8.062  | 8.275           | 9.031   |                         |
| ABCF2  | ERew1h7CdNF_opR7KI | rs219233   | 3.54                         | 3.39                      | 0.067                | 0.61                     | 19.81                         | 0.3434 | 8.064                             | 0.241              | 7.59    | 7.898           | 8.045  | 8.209           | 8.702   |                         |
| ABO    | x1.tbXvuLB4JcpVtVE | rs8176749  | 5.49                         | 5.24                      | 0.106                | 1.93                     | 0.62                          | 0.07   | 7.152                             | 0.035              | 7.1     | 7.125           | 7.146  | 7.17            | 7.278   |                         |
| ABO    | x1.tbXvuLB4JcpVtVE | rs8176746  | 5.49                         | 5.24                      | 0.106                | 1.75                     | 0.76                          | 0.07   | 7.152                             | 0.035              | 7.1     | 7.125           | 7.146  | 7.17            | 7.278   |                         |
| ABO    | x1.tbXvuLB4JcpVtVE | rs657152   | 3.45                         | 3.30                      | -0.064               | 0.52                     | 8.7                           | 0.35   | 7.152                             | 0.035              | 7.1     | 7.125           | 7.146  | 7.17            | 7.278   |                         |
| ABO    | x1.tbXvuLB4JcpVtVE | rs505922   | 4.57                         | 4.37                      | -0.088               | 0.64                     | -1.4                          | 0.3317 | 7.152                             | 0.035              | 7.1     | 7.125           | 7.146  | 7.17            | 7.278   |                         |
| ABO    | x1.tbXvuLB4JcpVtVE | rs11244079 | 5.55                         | 5.30                      | -0.107               | 1.47                     | 33.9                          | 0.06   | 7.152                             | 0.035              | 7.1     | 7.125           | 7.146  | 7.17            | 7.278   |                         |
| ACAT1  | 06jt6JSJ760.h05fgk | rs10890819 | 3.45                         | 3.30                      | -0.063               | 1.19                     | -3.48                         | 0.28   | 10.199                            | 0.266              | 8.9     | 10.049          | 10.21  | 10.36           | 10.796  |                         |
| ACAT1  | 06jt6JSJ760.h05fgk | rs6589006  | 5.47                         | 5.23                      | -0.112               | 1.21                     | 13.02                         | 0.4513 | 10.199                            | 0.266              | 8.9     | 10.049          | 10.21  | 10.36           | 10.796  |                         |
| ACAT1  | 06jt6JSJ760.h05fgk | rs12787445 | 5.01                         | 4.79                      | 0.1                  | 1.25                     | 15.85                         | 0.445  | 10.199                            | 0.266              | 8.9     | 10.049          | 10.21  | 10.36           | 10.796  |                         |
| ACCN5  | 3TB3J5Vv37ggMgxWIE | rs10020753 | 3.86                         | 3.69                      | -0.074               | 1.48                     | 46.6                          | 0.1281 | 7.152                             | 0.049              | 7.095   | 7.122           | 7.138  | 7.163           | 7.46    |                         |
| ACOT4  | x5egkD3JffeQEXqKxU | rs8015976  | 13.12                        | 12.52                     | -0.249               | 3.78                     | -3.29                         | 0.2525 | 7.746                             | 0.23               | 7.135   | 7.581           | 7.735  | 7.881           | 8.51    |                         |
| ACOT4  | x5egkD3JffeQEXqKxU | rs12891009 | 29.41                        | 28.02                     | 0.486                | 5.66                     | 21.38                         | 0.3925 | 7.746                             | 0.23               | 7.135   | 7.581           | 7.735  | 7.881           | 8.51    |                         |
| ACOT4  | x5egkD3JffeQEXqKxU | rs7155613  | 23.92                        | 22.79                     | 0.439                | 4.69                     | 24.77                         | 0.485  | 7.746                             | 0.23               | 7.135   | 7.581           | 7.735  | 7.881           | 8.51    |                         |
| ACP5   | uKV4HVOHISd4pWN1Hs | rs2229531  | 6.05                         | 5.78                      | 0.119                | 2.54                     | -1.3                          | 0.12   | 8.614                             | 0.384              | 7.785   | 8.364           | 8.6    | 8.862           | 9.792   |                         |
| ACP5   | uKV4HVOHISd4pWN1Hs | rs3760780  | 6.84                         | 6.53                      | -0.134               | 3.5                      | 0.66                          | 0.32   | 8.614                             | 0.384              | 7.785   | 8.364           | 8.6    | 8.862           | 9.792   |                         |
| ACP5   | uKV4HVOHISd4pWN1Hs | rs11881292 | 6.17                         | 5.90                      | 0.121                | 2.79                     | 5.99                          | 0.13   | 8.614                             | 0.384              | 7.785   | 8.364           | 8.6    | 8.862           | 9.792   |                         |
| ACP5   | uKV4HVOHISd4pWN1Hs | rs897811   | 6.02                         | 5.75                      | 0.121                | 2.77                     | 10.26                         | 0.1205 | 8.614                             | 0.384              | 7.785   | 8.364           | 8.6    | 8.862           | 9.792   |                         |
| ACP6   | u5YivleOp3IZ6E734M | rs3820129  | 4.85                         | 4.64                      | 0.093                | 1.12                     | -27.2                         | 0.3725 | 8.678                             | 0.332              | 7.762   | 8.5             | 8.695  | 8.898           | 9.831   |                         |
| ACP6   | u5YivleOp3IZ6E734M | rs2236570  | 3.65                         | 3.49                      | 0.069                | 0.09                     | -25.28                        | 0.3794 | 8.678                             | 0.332              | 7.762   | 8.5             | 8.695  | 8.898           | 9.831   |                         |
| ACP6   | u5YivleOp3IZ6E734M | rs12744461 | 8.26                         | 7.89                      | 0.163                | 3.1                      | -0.67                         | 0.4375 | 8.678                             | 0.332              | 7.762   | 8.5             | 8.695  | 8.898           | 9.831   |                         |
| ACP6   | u5YivleOp3IZ6E734M | rs1344     | 8.49                         | 8.11                      | -0.173               | 2.17                     | 0.1                           | 0.4275 | 8.678                             | 0.332              | 7.762   | 8.5             | 8.695  | 8.898           | 9.831   |                         |
| ACP6   | u5YivleOp3IZ6E734M | rs946904   | 6.56                         | 6.27                      | 0.129                | 2.06                     | 3.66                          | 0.4375 | 8.678                             | 0.332              | 7.762   | 8.5             | 8.695  | 8.898           | 9.831   |                         |
| ACP6   | u5YivleOp3IZ6E734M | rs12119079 | 6.2                          | 5.93                      | -0.122               | 0.87                     | 9.85                          | 0.3125 | 8.678                             | 0.332              | 7.762   | 8.5             | 8.695  | 8.898           | 9.831   |                         |
| ACP6   | u5YivleOp3IZ6E734M | rs3766509  | 4.08                         | 3.91                      | 0.077                | 1.15                     | 11.11                         | 0.48   | 8.678                             | 0.332              | 7.762   | 8.5             | 8.695  | 8.898           | 9.831   |                         |
| ACP6   | u5YivleOp3IZ6E734M | rs2275552  | 5.96                         | 5.69                      | -0.118               | 0.83                     | -10.67                        | 0.3125 | 8.678                             | 0.332              | 7.762   | 8.5             | 8.695  | 8.898           | 9.831   |                         |
| ACSL3  | coeqASewT_UV0gnnU  | rs12474230 | 5.85                         | 5.59                      | -0.118               | 4.37                     | -35.66                        | 0.315  | 7.271                             | 0.099              | 7.127   | 7.197           | 7.247  | 7.328           | 7.591   |                         |
| ACSL3  | coeqASewT_UV0gnnU  | rs10498144 | 5.78                         | 5.52                      | -0.117               | 4.37                     | -31.32                        | 0.3125 | 7.271                             | 0.099              | 7.127   | 7.197           | 7.247  | 7.328           | 7.591   |                         |
| ACSL5  | BUHjdVRX6PlvXncXxU | rs12268778 | 3.93                         | 3.77                      | 0.073                | 1.96                     | -7.18                         | 0.16   | 10.703                            | 0.26               | 9.651   | 10.546          | 10.685 | 10.881          | 11.54   |                         |
| ACSL5  | BUHjdVRX6PlvXncXxU | rs876873   | 4.06                         | 3.88                      | 0.076                | 2.09                     | -16.52                        | 0.16   | 10.703                            | 0.26               | 9.651   | 10.546          | 10.685 | 10.881          | 11.54   |                         |
| ACSM3  | BR7uLnngUPFXhuHgA4 | rs9932874  | 3.7                          | 3.54                      | -0.07                | 0.44                     | -49.47                        | 0.245  | 7.417                             | 0.1                | 7.17    | 7.348           | 7.405  | 7.475           | 7.74    |                         |
| ACSM3  | BR7uLnngUPFXhuHgA4 | rs11074471 | 3.39                         | 3.25                      | 0.064                | 0.95                     | -26.98                        | 0.14   | 7.417                             | 0.1                | 7.17    | 7.348           | 7.405  | 7.475           | 7.74    |                         |
| ACSM3  | BR7uLnngUPFXhuHgA4 | rs11647477 | 3.39                         | 3.25                      | 0.064                | 0.95                     | -0.39                         | 0.14   | 7.417                             | 0.1                | 7.17    | 7.348           | 7.405  | 7.475           | 7.74    |                         |
| ACSM3  | BR7uLnngUPFXhuHgA4 | rs2071524  | 3.39                         | 3.25                      | 0.064                | 0.95                     | -9.87                         | 0.14   | 7.417                             | 0.1                | 7.17    | 7.348           | 7.405  | 7.475           | 7.74    |                         |
| ACSM3  | BR7uLnngUPFXhuHgA4 | rs2107232  | 3.7                          | 3.54                      | -0.07                | 0.44                     | 26.68                         | 0.245  | 7.417                             | 0.1                | 7.17    | 7.348           | 7.405  | 7.475           | 7.74    |                         |
| ACSS2  | 05VLsnQle6_ygwJe40 | rs6088635  | 5.07                         | 4.84                      | -0.098               | 3.42                     | 3.66                          | 0.3975 | 10.068                            | 0.306              | 9.318   | 9.875           | 10.045 | 10.27           | 11.16   |                         |
| ACSS2  | 05VLsnQle6_ygwJe40 | rs4911163  | 4.51                         | 4.31                      | -0.086               | 3.06                     | 7.85                          | 0.405  | 10.068                            | 0.306              | 9.318   | 9.875           | 10.045 | 10.27           | 11.16   |                         |

| Symbol  | Lumi nuID          | SNP        | Population-based | Population-based          | % Variance | Family-based     | Distance from | MAF    | Mean      | Transcript abundance (log2 scale) |             |                 |            |         | SNP mapping under probe |
|---------|--------------------|------------|------------------|---------------------------|------------|------------------|---------------|--------|-----------|-----------------------------------|-------------|-----------------|------------|---------|-------------------------|
|         |                    |            | association      | association               |            |                  |               |        |           | explained                         | association | transcript (kb) | Standard   | 25th    |                         |
|         |                    |            | p-value (-log10) | p-value (-log10), GC adj. |            | p-value (-log10) |               |        | Deviation | Minimum                           | percentile  | percentile      | percentile | Maximum |                         |
| ACSS2   | 05VLSnQle6_ygwJe40 | rs6088640  | 4.51             | 4.31                      | -0.086     | 3.06             | 9.67          | 0.405  | 10.068    | 0.306                             | 9.318       | 9.875           | 10.045     | 10.27   | 11.16                   |
| ACSS2   | 05VLSnQle6_ygwJe40 | rs6120757  | 4.87             | 4.65                      | -0.094     | 3.25             | 25.93         | 0.3995 | 10.068    | 0.306                             | 9.318       | 9.875           | 10.045     | 10.27   | 11.16                   |
| ACSS2   | 05VLSnQle6_ygwJe40 | rs6088646  | 4.68             | 4.48                      | 0.09       | 3.04             | -9.82         | 0.4075 | 10.068    | 0.306                             | 9.318       | 9.875           | 10.045     | 10.27   | 11.16                   |
| ACSS2   | 05VLSnQle6_ygwJe40 | rs6088655  | 4.41             | 4.22                      | -0.085     | 3.06             | 12.08         | 0.407  | 10.068    | 0.306                             | 9.318       | 9.875           | 10.045     | 10.27   | 11.16                   |
| ACTA2   | uR.XnXd7dyREHuDte4 | rs12765241 | 4.69             | 4.49                      | -0.102     | 2.07             | 27.99         | 0.1275 | 8.703     | 0.461                             | 7.688       | 8.386           | 8.628      | 9.073   | 9.846                   |
| ACTA2   | uR.XnXd7dyREHuDte4 | rs10887876 | 4.85             | 4.64                      | -0.097     | 2.95             | 32.62         | 0.145  | 8.703     | 0.461                             | 7.688       | 8.386           | 8.628      | 9.073   | 9.846                   |
| ACTA2   | uR.XnXd7dyREHuDte4 | rs4934434  | 21.86            | 20.83                     | -0.409     | 8.98             | 34.66         | 0.3668 | 8.703     | 0.461                             | 7.688       | 8.386           | 8.628      | 9.073   | 9.846                   |
| ACTA2   | uR.XnXd7dyREHuDte4 | rs3740286  | 26.32            | 25.07                     | 0.47       | 9.03             | 38.83         | 0.345  | 8.703     | 0.461                             | 7.688       | 8.386           | 8.628      | 9.073   | 9.846                   |
| ACTA2   | uR.XnXd7dyREHuDte4 | rs7097467  | 4.85             | 4.64                      | 0.097      | 3.17             | 40.73         | 0.145  | 8.703     | 0.461                             | 7.688       | 8.386           | 8.628      | 9.073   | 9.846                   |
| ACTA2   | uR.XnXd7dyREHuDte4 | rs1926196  | 40.42            | 38.48                     | 0.635      | 12.83            | 41.24         | 0.4975 | 8.703     | 0.461                             | 7.688       | 8.386           | 8.628      | 9.073   | 9.846                   |
| ACTA2   | uR.XnXd7dyREHuDte4 | rs1571011  | 15.17            | 14.46                     | 0.3        | 6.22             | 45.28         | 0.3869 | 8.703     | 0.461                             | 7.688       | 8.386           | 8.628      | 9.073   | 9.846                   |
| ACTA2   | uR.XnXd7dyREHuDte4 | rs4406737  | 24.97            | 23.78                     | 0.468      | 9.79             | 47.21         | 0.4497 | 8.703     | 0.461                             | 7.688       | 8.386           | 8.628      | 9.073   | 9.846                   |
| ACTA2   | uR.XnXd7dyREHuDte4 | rs2147419  | 10.04            | 9.58                      | 0.202      | 4.12             | 47.41         | 0.2675 | 8.703     | 0.461                             | 7.688       | 8.386           | 8.628      | 9.073   | 9.846                   |
| ACTA2   | uR.XnXd7dyREHuDte4 | rs7920305  | 4.21             | 4.03                      | 0.083      | 3.33             | 47.71         | 0.1425 | 8.703     | 0.461                             | 7.688       | 8.386           | 8.628      | 9.073   | 9.846                   |
| ACTG2   | lItEr3UKNV2lcd7xS0 | rs10519327 | 3.67             | 3.51                      | -0.067     | 0.87             | -10.07        | 0.1225 | 7.293     | 0.157                             | 7.119       | 7.189           | 7.253      | 7.35    | 8.262                   |
| ACYP1   | EngHRJCJ7vUvJ.nFLw | rs175057   | 7.02             | 6.70                      | 0.137      | 1.37             | -30.29        | 0.4698 | 7.392     | 0.139                             | 7.12        | 7.283           | 7.389      | 7.487   | 7.787                   |
| ACYP1   | EngHRJCJ7vUvJ.nFLw | rs175505   | 6.23             | 5.96                      | 0.12       | 1.16             | -1.12         | 0.4825 | 7.392     | 0.139                             | 7.12        | 7.283           | 7.389      | 7.487   | 7.787                   |
| ACYP1   | EngHRJCJ7vUvJ.nFLw | rs4899545  | 6.53             | 6.24                      | -0.126     | 1.06             | 37.4          | 0.4775 | 7.392     | 0.139                             | 7.12        | 7.283           | 7.389      | 7.487   | 7.787                   |
| ACYP1   | EngHRJCJ7vUvJ.nFLw | rs119076   | 6.26             | 5.98                      | 0.121      | 1.07             | 41.68         | 0.48   | 7.392     | 0.139                             | 7.12        | 7.283           | 7.389      | 7.487   | 7.787                   |
| ACYP1   | EngHRJCJ7vUvJ.nFLw | rs10146482 | 6.3              | 6.02                      | -0.121     | 1.12             | 43.35         | 0.475  | 7.392     | 0.139                             | 7.12        | 7.283           | 7.389      | 7.487   | 7.787                   |
| ADAL    | 3euh.uKQTaMUerCn6l | rs580469   | 3.95             | 3.79                      | 0.077      | 0.58             | -47.3         | 0.09   | 7.569     | 0.147                             | 7.126       | 7.47            | 7.569      | 7.672   | 7.935                   |
| ADAL    | 3euh.uKQTaMUerCn6l | rs488756   | 6.03             | 5.77                      | -0.122     | 2.54             | -8.2          | 0.14   | 7.569     | 0.147                             | 7.126       | 7.47            | 7.569      | 7.672   | 7.935                   |
| ADAL    | 3euh.uKQTaMUerCn6l | rs3742970  | 6.85             | 6.54                      | 0.139      | 1.24             | -0.66         | 0.08   | 7.569     | 0.147                             | 7.126       | 7.47            | 7.569      | 7.672   | 7.935                   |
| ADAL    | 3euh.uKQTaMUerCn6l | rs2412780  | 7.44             | 7.11                      | 0.155      | 1.73             | 14.18         | 0.1075 | 7.569     | 0.147                             | 7.126       | 7.47            | 7.569      | 7.672   | 7.935                   |
| ADAL    | 3euh.uKQTaMUerCn6l | rs999047   | 6.43             | 6.15                      | -0.133     | 1.13             | 47.31         | 0.1375 | 7.569     | 0.147                             | 7.126       | 7.47            | 7.569      | 7.672   | 7.935                   |
| ADAMTS6 | KqAesVxF6iSzeUeowl | rs7713110  | 5.29             | 5.06                      | -0.108     | 0.69             | -146.31       | 0.4898 | 7.188     | 0.076                             | 7.105       | 7.144           | 7.161      | 7.208   | 7.637                   |
| ADAMTS6 | KqAesVxF6iSzeUeowl | rs2640717  | 4.95             | 4.74                      | -0.096     | 1.21             | -136.79       | 0.3819 | 7.188     | 0.076                             | 7.105       | 7.144           | 7.161      | 7.208   | 7.637                   |
| ADAMTS6 | KqAesVxF6iSzeUeowl | rs6878202  | 5.09             | 4.87                      | -0.102     | 0.84             | -134.6        | 0.4925 | 7.188     | 0.076                             | 7.105       | 7.144           | 7.161      | 7.208   | 7.637                   |
| ADAMTS6 | KqAesVxF6iSzeUeowl | rs7708972  | 5.19             | 4.96                      | 0.103      | 0.84             | -88.96        | 0.495  | 7.188     | 0.076                             | 7.105       | 7.144           | 7.161      | 7.208   | 7.637                   |
| ADAMTS6 | KqAesVxF6iSzeUeowl | rs786703   | 5.87             | 5.62                      | -0.118     | 0.56             | -62.04        | 0.3467 | 7.188     | 0.076                             | 7.105       | 7.144           | 7.161      | 7.208   | 7.637                   |
| ADAMTS6 | KqAesVxF6iSzeUeowl | rs1493451  | 5.79             | 5.53                      | -0.116     | 0.75             | -51.26        | 0.4725 | 7.188     | 0.076                             | 7.105       | 7.144           | 7.161      | 7.208   | 7.637                   |
| ADAMTS6 | KqAesVxF6iSzeUeowl | rs2047063  | 3.4              | 3.25                      | 0.067      | 0.57             | -45.47        | 0.4125 | 7.188     | 0.076                             | 7.105       | 7.144           | 7.161      | 7.208   | 7.637                   |
| ADAMTS6 | KqAesVxF6iSzeUeowl | rs33396    | 11.3             | 10.78                     | 0.224      | 1.25             | -9.03         | 0.3258 | 7.188     | 0.076                             | 7.105       | 7.144           | 7.161      | 7.208   | 7.637                   |
| ADAMTS6 | KqAesVxF6iSzeUeowl | rs402552   | 10.55            | 10.07                     | 0.215      | 3.31             | 17.49         | 0.3795 | 7.188     | 0.076                             | 7.105       | 7.144           | 7.161      | 7.208   | 7.637                   |
| ADAMTS6 | KqAesVxF6iSzeUeowl | rs380327   | 11.62            | 11.09                     | 0.226      | 2.02             | 20.38         | 0.385  | 7.188     | 0.076                             | 7.105       | 7.144           | 7.161      | 7.208   | 7.637                   |
| ADAMTS6 | KqAesVxF6iSzeUeowl | rs12517057 | 6.29             | 6.01                      | -0.125     | 1.87             | 27.4          | 0.3175 | 7.188     | 0.076                             | 7.105       | 7.144           | 7.161      | 7.208   | 7.637                   |
| ADARB2  | 0tbTpv6.OuljHCJR4o | rs10794730 | 4                | 3.83                      | -0.077     | 1.83             | 18.95         | 0.215  | 7.141     | 0.046                             | 7.096       | 7.11            | 7.127      | 7.159   | 7.376                   |
| ADARB2  | 0tbTpv6.OuljHCJR4o | rs883248   | 5.9              | 5.64                      | 0.116      | 4.12             | 22.11         | 0.375  | 7.141     | 0.046                             | 7.096       | 7.11            | 7.127      | 7.159   | 7.376                   |
| ADARB2  | 0tbTpv6.OuljHCJR4o | rs3817043  | 10.94            | 10.44                     | 0.219      | 4.06             | 28.56         | 0.3744 | 7.141     | 0.046                             | 7.096       | 7.11            | 7.127      | 7.159   | 7.376                   |
| ADARB2  | 0tbTpv6.OuljHCJR4o | rs4880802  | 4.44             | 4.25                      | -0.091     | 1.22             | 52.34         | 0.4031 | 7.141     | 0.046                             | 7.096       | 7.11            | 7.127      | 7.159   | 7.376                   |
| ADARB2  | 0tbTpv6.OuljHCJR4o | rs6560721  | 5.17             | 4.94                      | -0.103     | 1.88             | 72.18         | 0.445  | 7.141     | 0.046                             | 7.096       | 7.11            | 7.127      | 7.159   | 7.376                   |
| ADARB2  | 0tbTpv6.OuljHCJR4o | rs3849973  | 14.99            | 14.30                     | -0.29      | 2.95             | 78.15         | 0.3425 | 7.141     | 0.046                             | 7.096       | 7.11            | 7.127      | 7.159   | 7.376                   |
| ADARB2  | 0tbTpv6.OuljHCJR4o | rs4880807  | 14.99            | 14.30                     | -0.29      | 3.25             | 78.67         | 0.3425 | 7.141     | 0.046                             | 7.096       | 7.11            | 7.127      | 7.159   | 7.376                   |
| ADARB2  | 0tbTpv6.OuljHCJR4o | rs17156146 | 14.55            | 13.87                     | 0.286      | 3.06             | 94.54         | 0.3266 | 7.141     | 0.046                             | 7.096       | 7.11            | 7.127      | 7.159   | 7.376                   |
| ADARB2  | 0tbTpv6.OuljHCJR4o | rs2804102  | 5.64             | 5.39                      | -0.113     | 2.01             | 97.34         | 0.4675 | 7.141     | 0.046                             | 7.096       | 7.11            | 7.127      | 7.159   | 7.376                   |
| ADCY3   | Bfl.4nfnEtl.nHn8lg | rs6760328  | 4.05             | 3.87                      | 0.077      | 1.52             | 35.95         | 0.3125 | 10.297    | 0.355                             | 8.263       | 10.106          | 10.316     | 10.538  | 11.028                  |
| ADCY3   | Bfl.4nfnEtl.nHn8lg | rs1541984  | 6.55             | 6.26                      | 0.129      | 3.05             | 40.37         | 0.3875 | 10.297    | 0.355                             | 8.263       | 10.106          | 10.316     | 10.538  | 11.028                  |
| ADCY3   | Bfl.4nfnEtl.nHn8lg | rs7597157  | 5.22             | 4.99                      | -0.101     | 1.48             | 47.12         | 0.3475 | 10.297    | 0.355                             | 8.263       | 10.106          | 10.316     | 10.538  | 11.028                  |
| ADCY3   | Bfl.4nfnEtl.nHn8lg | rs13407913 | 5.99             | 5.73                      | -0.117     | 2.45             | -44.36        | 0.4146 | 10.297    | 0.355                             | 8.263       | 10.106          | 10.316     | 10.538  | 11.028                  |
| ADCY3   | Bfl.4nfnEtl.nHn8lg | rs2033655  | 6.22             | 5.95                      | 0.122      | 2.97             | -40.91        | 0.4    | 10.297    | 0.355                             | 8.263       | 10.106          | 10.316     | 10.538  | 11.028                  |
| ADCY3   | Bfl.4nfnEtl.nHn8lg | rs2033654  | 5.85             | 5.59                      | 0.114      | 2.56             | -38.9         | 0.4125 | 10.297    | 0.355                             | 8.263       | 10.106          | 10.316     | 10.538  | 11.028                  |
| ADCY3   | Bfl.4nfnEtl.nHn8lg | rs1865687  | 4.83             | 4.62                      | 0.093      | 0.9              | -29.12        | 0.3625 | 10.297    | 0.355                             | 8.263       | 10.106          | 10.316     | 10.538  | 11.028                  |
| ADCY3   | Bfl.4nfnEtl.nHn8lg | rs6736711  | 4.83             | 4.62                      | -0.093     | 0.9              | -25.55        | 0.3625 | 10.297    | 0.355                             | 8.263       | 10.106          | 10.316     | 10.538  | 11.028                  |
| ADCY3   | Bfl.4nfnEtl.nHn8lg | rs6721750  | 5.45             | 5.22                      | -0.108     | 2.68             | -13.28        | 0.4133 | 10.297    | 0.355                             | 8.263       | 10.106          | 10.316     | 10.538  | 11.028                  |
| ADCY3   | Bfl.4nfnEtl.nHn8lg | rs7565468  | 4.94             | 4.73                      | -0.096     | 1.31             | -11.91        | 0.3425 | 10.297    | 0.355                             | 8.263       | 10.106          | 10.316     | 10.538  | 11.028                  |
| ADCY3   | Bfl.4nfnEtl.nHn8lg | rs2384061  | 5.92             | 5.66                      | 0.116      | 2.76             | -6.38         | 0.395  | 10.297    | 0.355                             | 8.263       | 10.106          | 10.316     | 10.538  | 11.028                  |
| ADCY3   | Bfl.4nfnEtl.nHn8lg | rs6752378  | 7.58             | 7.24                      | 0.151      | 3.68             | 8.11          | 0.4347 | 10.297    | 0.355                             | 8.263       | 10.106          | 10.316     | 10.538  | 11.028                  |
| ADCY3   | Bfl.4nfnEtl.nHn8lg | rs10182181 | 7.61             | 7.27                      | -0.151     | 3.54             | 8.29          | 0.4375 | 10.297    | 0.355                             | 8.263       | 10.106          | 10.316     | 10.538  | 11.028                  |
| ADCY3   | Bfl.4nfnEtl.nHn8lg | rs6726261  | 4.69             | 4.48                      | 0.093      | 1.81             | 11.98         | 0.346  | 10.297    | 0.355                             | 8.263       | 10.106          | 10.316     | 10.538  | 11.028                  |
| ADCY3   | Bfl.4nfnEtl.nHn8lg | rs713587   | 7.39             | 7.06                      | -0.146     | 3.47             | 16.28         | 0.435  | 10.297    | 0.355                             | 8.263       | 10.106          | 10.316     | 10.538  | 11.028                  |
| ADCY7   | HVpqp3XpC0oK_e_cMw | rs4785412  | 3.81             | 3.65                      | -0.073     | 1.61             | 33.42         | 0.1525 | 9.16      | 0.378                             | 7.792       | 8.95            | 9.213      | 9.438   | 9.831                   |
| ADI1    | xWuu445TMSp_fe0LS  | rs12620727 | 10.01            | 9.55                      | -0.207     | 2.32             | -2.81         | 0.115  | 10.877    | 0.237                             | 10.127      | 10.736          | 10.899     | 11.044  | 11.371                  |

| Symbol  | Lumi nuID           | SNP        | Population-based association |                  | % Variance Explained | Family-based association |                               | Transcript abundance (log2 scale) |        |                    |         |                 |        |                 | SNP mapping under probe |         |
|---------|---------------------|------------|------------------------------|------------------|----------------------|--------------------------|-------------------------------|-----------------------------------|--------|--------------------|---------|-----------------|--------|-----------------|-------------------------|---------|
|         |                     |            | p-value (-log10)             | p-value (-log10) |                      | p-value (-log10)         | Distance from transcript (kb) | MAF                               | Mean   | Standard Deviation | Minimum | 25th percentile | Median | 75th percentile |                         | Maximum |
| AD1I    | xWuu445TmWSp_fe0Ls  | rs10205909 | 4.17                         | 3.99             | -0.083               | 1.63                     | 3.3                           | 0.3056                            | 10.877 | 0.237              | 10.127  | 10.736          | 10.899 | 11.044          | 11.371                  |         |
| ADORA2B | rRCgOh5d34kfv6JxRs  | rs1045599  | 3.93                         | 3.76             | -0.073               | 2.88                     | 0.7                           | 0.3475                            | 7.262  | 0.156              | 7.107   | 7.144           | 7.213  | 7.329           | 8.108                   |         |
| ADORA2B | rRCgOh5d34kfv6JxRs  | rs10491104 | 4.01                         | 3.84             | -0.075               | 2.36                     | 5.35                          | 0.39                              | 7.262  | 0.156              | 7.107   | 7.144           | 7.213  | 7.329           | 8.108                   |         |
| ADORA2B | rRCgOh5d34kfv6JxRs  | rs8070859  | 3.77                         | 3.61             | -0.07                | 2.64                     | 8.58                          | 0.3475                            | 7.262  | 0.156              | 7.107   | 7.144           | 7.213  | 7.329           | 8.108                   |         |
| ADORA2B | rRCgOh5d34kfv6JxRs  | rs2302415  | 3.64                         | 3.48             | -0.067               | 2.55                     | 27.18                         | 0.345                             | 7.262  | 0.156              | 7.107   | 7.144           | 7.213  | 7.329           | 8.108                   |         |
| ADORA2B | rRCgOh5d34kfv6JxRs  | rs9891938  | 4.07                         | 3.89             | -0.078               | 2.26                     | 35.86                         | 0.346                             | 7.262  | 0.156              | 7.107   | 7.144           | 7.213  | 7.329           | 8.108                   |         |
| ADORA2B | rRCgOh5d34kfv6JxRs  | rs11869450 | 3.68                         | 3.52             | -0.068               | 2.43                     | 44.5                          | 0.3442                            | 7.262  | 0.156              | 7.107   | 7.144           | 7.213  | 7.329           | 8.108                   |         |
| AFAP    | 6.RuuwVyHplfpuVf7s  | rs6821044  | 4.65                         | 4.44             | 0.087                | 1.09                     | 42.24                         | 0.4475                            | 8.103  | 0.297              | 7.4     | 7.904           | 8.085  | 8.304           | 9.12                    | Yes     |
| AFAP    | 6.RuuwVyHplfpuVf7s  | rs1106248  | 4.04                         | 3.87             | -0.074               | 1.31                     | 47.39                         | 0.47                              | 8.103  | 0.297              | 7.4     | 7.904           | 8.085  | 8.304           | 9.12                    | Yes     |
| AFAP    | 6.RuuwVyHplfpuVf7s  | rs7685914  | 3.95                         | 3.78             | -0.073               | 0.97                     | 71.02                         | 0.4475                            | 8.103  | 0.297              | 7.4     | 7.904           | 8.085  | 8.304           | 9.12                    | Yes     |
| AFAP    | 6.RuuwVyHplfpuVf7s  | rs4580651  | 3.55                         | 3.40             | -0.065               | 0.65                     | 81.05                         | 0.38                              | 8.103  | 0.297              | 7.4     | 7.904           | 8.085  | 8.304           | 9.12                    | Yes     |
| AFAP    | 6.RuuwVyHplfpuVf7s  | rs4619890  | 4.22                         | 4.03             | -0.078               | 1.75                     | -88.43                        | 0.4875                            | 8.103  | 0.297              | 7.4     | 7.904           | 8.085  | 8.304           | 9.12                    | Yes     |
| AFAP    | 6.RuuwVyHplfpuVf7s  | rs12509421 | 9.31                         | 8.89             | -0.178               | 4.04                     | -12.07                        | 0.4225                            | 8.103  | 0.297              | 7.4     | 7.904           | 8.085  | 8.304           | 9.12                    | Yes     |
| AFAP    | 6.RuuwVyHplfpuVf7s  | rs11930623 | 11.85                        | 11.30            | 0.223                | 4.37                     | -9.9                          | 0.4075                            | 8.103  | 0.297              | 7.4     | 7.904           | 8.085  | 8.304           | 9.12                    | Yes     |
| AFAP    | 6.RuuwVyHplfpuVf7s  | rs4696687  | 3.43                         | 3.28             | -0.064               | 1.73                     | -2.39                         | 0.165                             | 8.103  | 0.297              | 7.4     | 7.904           | 8.085  | 8.304           | 9.12                    | Yes     |
| AFAP    | 6.RuuwVyHplfpuVf7s  | rs6447872  | 6.43                         | 6.15             | -0.124               | 1.95                     | 1.52                          | 0.3125                            | 8.103  | 0.297              | 7.4     | 7.904           | 8.085  | 8.304           | 9.12                    | Yes     |
| AFAP    | 6.RuuwVyHplfpuVf7s  | rs2891924  | 3.96                         | 3.80             | -0.075               | 2.46                     | 6.7                           | 0.175                             | 8.103  | 0.297              | 7.4     | 7.904           | 8.085  | 8.304           | 9.12                    | Yes     |
| AFAP    | 6.RuuwVyHplfpuVf7s  | rs4696833  | 3.67                         | 3.52             | -0.068               | 1.15                     | 9.55                          | 0.235                             | 8.103  | 0.297              | 7.4     | 7.904           | 8.085  | 8.304           | 9.12                    | Yes     |
| AFAP    | 6.RuuwVyHplfpuVf7s  | rs11732351 | 8.43                         | 8.05             | 0.163                | 2.32                     | 13.9                          | 0.4322                            | 8.103  | 0.297              | 7.4     | 7.904           | 8.085  | 8.304           | 9.12                    | Yes     |
| AFAP    | 6.RuuwVyHplfpuVf7s  | rs10008860 | 4.64                         | 4.44             | -0.089               | 0.79                     | 28.01                         | 0.4397                            | 8.103  | 0.297              | 7.4     | 7.904           | 8.085  | 8.304           | 9.12                    | Yes     |
| AFF3    | ZJiCinUZ0lOgglb0E   | rs1115910  | 3.33                         | 3.19             | 0.06                 | 1.25                     | -111.17                       | 0.4825                            | 7.441  | 0.165              | 7.137   | 7.322           | 7.417  | 7.537           | 8.013                   | Yes     |
| AFF3    | ZJiCinUZ0lOgglb0E   | rs11695782 | 5.26                         | 5.03             | -0.097               | 2.45                     | -80.84                        | 0.1975                            | 7.441  | 0.165              | 7.137   | 7.322           | 7.417  | 7.537           | 8.013                   | Yes     |
| AFF3    | ZJiCinUZ0lOgglb0E   | rs6749757  | 3.66                         | 3.51             | -0.065               | 1.57                     | -28.93                        | 0.4875                            | 7.441  | 0.165              | 7.137   | 7.322           | 7.417  | 7.537           | 8.013                   | Yes     |
| AFF3    | ZJiCinUZ0lOgglb0E   | rs6706188  | 8.01                         | 7.65             | -0.151               | 2.7                      | -19.07                        | 0.275                             | 7.441  | 0.165              | 7.137   | 7.322           | 7.417  | 7.537           | 8.013                   | Yes     |
| AFF3    | ZJiCinUZ0lOgglb0E   | rs1437377  | 6.81                         | 6.50             | -0.125               | 2.12                     | -14.11                        | 0.145                             | 7.441  | 0.165              | 7.137   | 7.322           | 7.417  | 7.537           | 8.013                   | Yes     |
| AFF3    | osj1QiIH8kIFJfkd7Eo | rs1437377  | 3.7                          | 3.54             | 0.069                | 2.53                     | -14.11                        | 0.145                             | 8.07   | 0.363              | 7.118   | 7.838           | 8.012  | 8.326           | 9.287                   |         |
| AGA     | ud3s4QdxIL7mbn90kk  | rs2271100  | 5.39                         | 5.15             | -0.106               | 1.12                     | -3.91                         | 0.205                             | 8.95   | 0.333              | 7.105   | 8.777           | 8.962  | 9.173           | 9.682                   |         |
| AGA     | ud3s4QdxIL7mbn90kk  | rs4690523  | 4.16                         | 3.98             | 0.079                | 1.15                     | -2.43                         | 0.4875                            | 8.95   | 0.333              | 7.105   | 8.777           | 8.962  | 9.173           | 9.682                   |         |
| AGA     | ud3s4QdxIL7mbn90kk  | rs7680586  | 5.25                         | 5.02             | 0.104                | 1.22                     | 6.17                          | 0.2071                            | 8.95   | 0.333              | 7.105   | 8.777           | 8.962  | 9.173           | 9.682                   |         |
| AGPAT1  | HA1bZVfpFhFWEIEIQ   | rs2854050  | 4.05                         | 3.88             | -0.079               | 0.84                     | 41.71                         | 0.07                              | 7.21   | 0.057              | 7.115   | 7.177           | 7.201  | 7.233           | 7.534                   |         |
| AGXT    | I.V1LpF16AS1H6mQBU  | rs4675854  | 4.2                          | 4.02             | -0.084               | 0.5                      | 32.64                         | 0.1                               | 7.114  | 0.009              | 7.095   | 7.107           | 7.112  | 7.12            | 7.142                   |         |
| AH1I    | fi6R4weuCXEINZUA4   | rs2207000  | 4.67                         | 4.47             | -0.085               | 6.17                     | 18.71                         | 0.185                             | 7.744  | 0.265              | 7.176   | 7.583           | 7.715  | 7.887           | 9.365                   |         |
| AH1I    | fi6R4weuCXEINZUA4   | rs6931735  | 7.53                         | 7.19             | -0.139               | 3.28                     | 19.69                         | 0.4325                            | 7.744  | 0.265              | 7.176   | 7.583           | 7.715  | 7.887           | 9.365                   |         |
| AH1I    | fi6R4weuCXEINZUA4   | rs2064430  | 6                            | 5.74             | -0.111               | 2.89                     | 37.63                         | 0.465                             | 7.744  | 0.265              | 7.176   | 7.583           | 7.715  | 7.887           | 9.365                   |         |
| AH1I    | fi6R4weuCXEINZUA4   | rs7772681  | 5.96                         | 5.70             | 0.111                | 2.55                     | 43.89                         | 0.48                              | 7.744  | 0.265              | 7.176   | 7.583           | 7.715  | 7.887           | 9.365                   |         |
| AH1I    | fi6R4weuCXEINZUA4   | rs13208164 | 5.21                         | 4.98             | 0.095                | 2.17                     | -97.6                         | 0.265                             | 7.744  | 0.265              | 7.176   | 7.583           | 7.715  | 7.887           | 9.365                   |         |
| AH1I    | fi6R4weuCXEINZUA4   | rs11154801 | 10.97                        | 10.47            | 0.202                | 5.76                     | -79.53                        | 0.37                              | 7.744  | 0.265              | 7.176   | 7.583           | 7.715  | 7.887           | 9.365                   |         |
| AH1I    | fi6R4weuCXEINZUA4   | rs717120   | 7.07                         | 6.75             | 0.13                 | 1.65                     | -53.75                        | 0.205                             | 7.744  | 0.265              | 7.176   | 7.583           | 7.715  | 7.887           | 9.365                   |         |
| AH1I    | fi6R4weuCXEINZUA4   | rs9389295  | 8.55                         | 8.16             | 0.161                | 3.69                     | 29.34                         | 0.46                              | 7.744  | 0.265              | 7.176   | 7.583           | 7.715  | 7.887           | 9.365                   |         |
| AH1I    | fi6R4weuCXEINZUA4   | rs9402715  | 8.83                         | 8.43             | -0.167               | 3.8                      | 40.81                         | 0.4673                            | 7.744  | 0.265              | 7.176   | 7.583           | 7.715  | 7.887           | 9.365                   |         |
| AHSA2   | KqB6UggrZlOvkeD.uU  | rs2290324  | 3.58                         | 3.43             | 0.069                | 0.87                     | 34.72                         | 0.2175                            | 10.339 | 0.539              | 7.222   | 10.046          | 10.312 | 10.68           | 11.814                  |         |
| AK2     | cU1e4pDq6g4yhKQlGk  | rs17511157 | 3.36                         | 3.22             | -0.062               | 0.28                     | -30.07                        | 0.1884                            | 8.931  | 0.259              | 8.249   | 8.751           | 8.941  | 9.123           | 9.547                   |         |
| AKAP10  | 3_19QJK4tJVFIJSkn8  | rs397969   | 7.74                         | 7.39             | -0.155               | 2.53                     | -4.5                          | 0.3625                            | 8.194  | 0.333              | 7.122   | 8.001           | 8.197  | 8.421           | 9.206                   |         |
| AKAP10  | 3_19QJK4tJVFIJSkn8  | rs203467   | 5.15                         | 4.92             | 0.101                | 1.38                     | 1                             | 0.225                             | 8.194  | 0.333              | 7.122   | 8.001           | 8.197  | 8.421           | 9.206                   |         |
| AKAP10  | 3_19QJK4tJVFIJSkn8  | rs203462   | 7.74                         | 7.39             | -0.155               | 2.59                     | 3.79                          | 0.3625                            | 8.194  | 0.333              | 7.122   | 8.001           | 8.197  | 8.421           | 9.206                   |         |
| AKAP10  | 3_19QJK4tJVFIJSkn8  | rs203481   | 7.68                         | 7.33             | 0.154                | 2.59                     | 19.98                         | 0.3618                            | 8.194  | 0.333              | 7.122   | 8.001           | 8.197  | 8.421           | 9.206                   |         |
| AKAP10  | 3_19QJK4tJVFIJSkn8  | rs11658169 | 3.51                         | 3.36             | 0.068                | 2.9                      | -9.21                         | 0.405                             | 8.194  | 0.333              | 7.122   | 8.001           | 8.197  | 8.421           | 9.206                   |         |
| AKAP10  | 3_19QJK4tJVFIJSkn8  | rs9901294  | 4.79                         | 4.58             | -0.094               | 1.19                     | 7.37                          | 0.2575                            | 8.194  | 0.333              | 7.122   | 8.001           | 8.197  | 8.421           | 9.206                   |         |
| AKAP10  | 3_19QJK4tJVFIJSkn8  | rs12453720 | 4.1                          | 3.92             | -0.08                | 1.14                     | 14.07                         | 0.2575                            | 8.194  | 0.333              | 7.122   | 8.001           | 8.197  | 8.421           | 9.206                   |         |
| AKAP10  | 3_19QJK4tJVFIJSkn8  | rs7218708  | 3.44                         | 3.30             | 0.066                | 2.27                     | 45.71                         | 0.48                              | 8.194  | 0.333              | 7.122   | 8.001           | 8.197  | 8.421           | 9.206                   |         |
| AKAP10  | 3_19QJK4tJVFIJSkn8  | rs1034904  | 3.7                          | 3.55             | 0.072                | 2.41                     | 46.57                         | 0.4875                            | 8.194  | 0.333              | 7.122   | 8.001           | 8.197  | 8.421           | 9.206                   |         |
| AKAP12  | W9.vov5ZiZt19PZKeo  | rs4870002  | 4.02                         | 3.85             | -0.08                | 1.49                     | 7.73                          | 0.42                              | 7.152  | 0.027              | 7.098   | 7.133           | 7.148  | 7.169           | 7.257                   |         |
| AKAP12  | EqipKhWcJ43XsSy5x8  | rs9479015  | 3.91                         | 3.74             | 0.076                | 1.15                     | 12.49                         | 0.1175                            | 7.145  | 0.03               | 7.105   | 7.126           | 7.136  | 7.157           | 7.342                   |         |
| AKAP13  | 6TdHCrwkbfVr6e7Vc   | rs959309   | 3.51                         | 3.36             | -0.065               | 0.78                     | 3.65                          | 0.0675                            | 8.879  | 0.339              | 8.021   | 8.614           | 8.857  | 9.15            | 9.896                   |         |
| AKIRIN2 | QeT_6ni_9fvi_QitU   | rs2754266  | 3.36                         | 3.22             | 0.064                | 0.83                     | 9.56                          | 0.0875                            | 10.011 | 0.259              | 8.452   | 9.88            | 9.997  | 10.126          | 11.097                  |         |
| AKR1C3  | ilrh6EzRdx8DW178mE  | rs6601900  | 3.8                          | 3.63             | 0.074                | 1.27                     | -13.43                        | 0.4275                            | 8.62   | 0.422              | 7.599   | 8.357           | 8.606  | 8.903           | 9.682                   |         |
| AKR1C3  | ilrh6EzRdx8DW178mE  | rs11252934 | 4.65                         | 4.45             | -0.091               | 2.89                     | -2.15                         | 0.3675                            | 8.62   | 0.422              | 7.599   | 8.357           | 8.606  | 8.903           | 9.682                   |         |
| AKR1C3  | ilrh6EzRdx8DW178mE  | rs7086693  | 3.92                         | 3.75             | 0.076                | 2.22                     | 15.94                         | 0.425                             | 8.62   | 0.422              | 7.599   | 8.357           | 8.606  | 8.903           | 9.682                   |         |
| AKR1C3  | ilrh6EzRdx8DW178mE  | rs11252994 | 3.87                         | 3.71             | 0.076                | 2.13                     | 28.39                         | 0.4246                            | 8.62   | 0.422              | 7.599   | 8.357           | 8.606  | 8.903           | 9.682                   |         |
| AKR1CL2 | xR9fe5XILhVsvPcCSI  | rs2961597  | 3.59                         | 3.43             | 0.068                | 1.25                     | -0.73                         | 0.095                             | 7.232  | 0.086              | 7.118   | 7.173           | 7.214  | 7.266           | 7.707                   | Yes     |
| AKR1CL2 | xR9fe5XILhVsvPcCSI  | rs4242772  | 3.39                         | 3.39             | 0.067                | 1.24                     | 4.59                          | 0.05                              | 7.232  | 0.086              | 7.118   | 7.173           | 7.214  | 7.266           | 7.707                   | Yes     |
| ALCAM   | HntIF2lkgTIAdlnehY  | rs4894924  | 4.5                          | 4.31             | 0.091                | 1.58                     | 27.52                         | 0.485                             | 8.02   | 0.294              | 7.222   | 7.836           | 7.986  | 8.232           | 9.215                   |         |

| Symbol   | Lumi nuID          | SNP        | Population-based             | Population-based                      | % Variance Explained | Family-based                 | Distance from transcript (kb) | MAF    | Mean   | Transcript abundance (log2 scale) |         |                 |        |                 | SNP mapping under probe |
|----------|--------------------|------------|------------------------------|---------------------------------------|----------------------|------------------------------|-------------------------------|--------|--------|-----------------------------------|---------|-----------------|--------|-----------------|-------------------------|
|          |                    |            | association p-value (-log10) | association p-value (-log10), GC adj. |                      | association p-value (-log10) |                               |        |        | Standard Deviation                | Minimum | 25th percentile | Median | 75th percentile |                         |
| ALDH16A1 | K6qHj14mUXHk.6EXRE | rs7462     | 9.14                         | 8.72                                  | 0.18                 | 2.3                          | -6.86                         | 0.31   | 10.227 | 0.29                              | 9.656   | 10.055          | 10.225 | 10.39           | 11.078                  |
| ALDH16A1 | K6qHj14mUXHk.6EXRE | rs1006938  | 10.87                        | 10.37                                 | -0.211               | 5.03                         | 0.54                          | 0.385  | 10.227 | 0.29                              | 9.656   | 10.055          | 10.225 | 10.39           | 11.078                  |
| ALDH16A1 | K6qHj14mUXHk.6EXRE | rs2280401  | 4.56                         | 4.36                                  | -0.089               | 1.85                         | 26.16                         | 0.22   | 10.227 | 0.29                              | 9.656   | 10.055          | 10.225 | 10.39           | 11.078                  |
| ALDH3A2  | orHeeLqQp4Ilpe6Dkk | rs4621031  | 5.78                         | 5.52                                  | 0.123                | 2.56                         | -1.79                         | 0.3351 | 9.53   | 0.18                              | 8.997   | 9.418           | 9.54   | 9.664           | 10.019                  |
| ALDH3A2  | orHeeLqQp4Ilpe6Dkk | rs962801   | 5.81                         | 5.56                                  | -0.12                | 2.8                          | 7.03                          | 0.325  | 9.53   | 0.18                              | 8.997   | 9.418           | 9.54   | 9.664           | 10.019                  |
| ALDH3A2  | orHeeLqQp4Ilpe6Dkk | rs2072331  | 3.37                         | 3.23                                  | 0.065                | 1.38                         | -5.18                         | 0.23   | 9.53   | 0.18                              | 8.997   | 9.418           | 9.54   | 9.664           | 10.019                  |
| ALDH3A2  | orHeeLqQp4Ilpe6Dkk | rs3786038  | 5.97                         | 5.70                                  | -0.121               | 2.6                          | -3.5                          | 0.3175 | 9.53   | 0.18                              | 8.997   | 9.418           | 9.54   | 9.664           | 10.019                  |
| ALDH7A1  | Qh7hLhw1VzhVAlePA0 | rs6870785  | 5.48                         | 5.24                                  | 0.108                | 0.56                         | 25.12                         | 0.1925 | 7.425  | 0.199                             | 7.11    | 7.285           | 7.392  | 7.528           | 8.285                   |
| ALDH7A1  | Qh7hLhw1VzhVAlePA0 | rs7714044  | 7.62                         | 7.28                                  | 0.147                | 1.07                         | -12.9                         | 0.105  | 7.425  | 0.199                             | 7.11    | 7.285           | 7.392  | 7.528           | 8.285                   |
| ALDH7A1  | Qh7hLhw1VzhVAlePA0 | rs6861395  | 8.07                         | 7.70                                  | 0.156                | 1.07                         | -2.2                          | 0.1025 | 7.425  | 0.199                             | 7.11    | 7.285           | 7.392  | 7.528           | 8.285                   |
| ALG11    | ALjHVKE.nr976Uvyto | rs3742290  | 3.64                         | 3.49                                  | 0.064                | 0.47                         | -0.54                         | 0.1256 | 7.991  | 0.207                             | 7.197   | 7.861           | 7.978  | 8.136           | 8.63                    |
| ALPL     | Q0R16neBERIU13eCYc | rs10917023 | 4.7                          | 4.50                                  | 0.091                | 1.44                         | 20.7                          | 0.08   | 7.283  | 0.265                             | 7.102   | 7.173           | 7.226  | 7.278           | 8.973                   |
| ALS2     | NdcRbriTEi7Xj_7wuE | rs7590550  | 3.94                         | 3.77                                  | 0.076                | 1.2                          | -6.86                         | 0.1575 | 8.37   | 0.236                             | 7.66    | 8.241           | 8.367  | 8.509           | 9.578                   |
| ALS2     | NdcRbriTEi7Xj_7wuE | rs888012   | 4.46                         | 4.27                                  | 0.087                | 1.53                         | -3.71                         | 0.29   | 8.37   | 0.236                             | 7.66    | 8.241           | 8.367  | 8.509           | 9.578                   |
| ALS2     | NdcRbriTEi7Xj_7wuE | rs10200479 | 4.76                         | 4.55                                  | -0.094               | 1.48                         | 10.66                         | 0.15   | 8.37   | 0.236                             | 7.66    | 8.241           | 8.367  | 8.509           | 9.578                   |
| ALS2     | NdcRbriTEi7Xj_7wuE | rs2110739  | 4.07                         | 3.90                                  | -0.079               | 0.34                         | 36.23                         | 0.3125 | 8.37   | 0.236                             | 7.66    | 8.241           | 8.367  | 8.509           | 9.578                   |
| ALS2     | NdcRbriTEi7Xj_7wuE | rs1981725  | 3.52                         | 3.37                                  | -0.067               | 0.23                         | -38.61                        | 0.32   | 8.37   | 0.236                             | 7.66    | 8.241           | 8.367  | 8.509           | 9.578                   |
| ALS2     | NdcRbriTEi7Xj_7wuE | rs4673207  | 3.73                         | 3.57                                  | -0.072               | 0.54                         | -36.86                        | 0.26   | 8.37   | 0.236                             | 7.66    | 8.241           | 8.367  | 8.509           | 9.578                   |
| ALS2     | NdcRbriTEi7Xj_7wuE | rs3820967  | 4.78                         | 4.57                                  | -0.094               | 0.6                          | -36.37                        | 0.3425 | 8.37   | 0.236                             | 7.66    | 8.241           | 8.367  | 8.509           | 9.578                   |
| ALS2     | NdcRbriTEi7Xj_7wuE | rs4675225  | 4.78                         | 4.57                                  | -0.094               | 0.6                          | -35.49                        | 0.3425 | 8.37   | 0.236                             | 7.66    | 8.241           | 8.367  | 8.509           | 9.578                   |
| ALS2     | NdcRbriTEi7Xj_7wuE | rs2192760  | 3.73                         | 3.58                                  | 0.072                | 0.23                         | -29.52                        | 0.3418 | 8.37   | 0.236                             | 7.66    | 8.241           | 8.367  | 8.509           | 9.578                   |
| ALS2     | NdcRbriTEi7Xj_7wuE | rs10211216 | 8.26                         | 7.88                                  | 0.164                | 2.06                         | -24.75                        | 0.14   | 8.37   | 0.236                             | 7.66    | 8.241           | 8.367  | 8.509           | 9.578                   |
| ALS2     | NdcRbriTEi7Xj_7wuE | rs2349733  | 6.26                         | 5.98                                  | 0.123                | 0.99                         | -22.67                        | 0.2575 | 8.37   | 0.236                             | 7.66    | 8.241           | 8.367  | 8.509           | 9.578                   |
| ALS2     | NdcRbriTEi7Xj_7wuE | rs3219153  | 8.26                         | 7.88                                  | -0.164               | 2.06                         | -12.16                        | 0.14   | 8.37   | 0.236                             | 7.66    | 8.241           | 8.367  | 8.509           | 9.578                   |
| ALS2     | NdcRbriTEi7Xj_7wuE | rs7558424  | 8.26                         | 7.88                                  | -0.164               | 2.06                         | -7.39                         | 0.14   | 8.37   | 0.236                             | 7.66    | 8.241           | 8.367  | 8.509           | 9.578                   |
| ALS2     | NdcRbriTEi7Xj_7wuE | rs13419174 | 7.58                         | 7.24                                  | -0.151               | 1.56                         | 5.39                          | 0.1675 | 8.37   | 0.236                             | 7.66    | 8.241           | 8.367  | 8.509           | 9.578                   |
| ALS2     | NdcRbriTEi7Xj_7wuE | rs7570835  | 8.26                         | 7.88                                  | 0.164                | 2.06                         | 7.9                           | 0.14   | 8.37   | 0.236                             | 7.66    | 8.241           | 8.367  | 8.509           | 9.578                   |
| ALS2     | NdcRbriTEi7Xj_7wuE | rs7597686  | 8.03                         | 7.67                                  | -0.16                | 1.55                         | 11.46                         | 0.215  | 8.37   | 0.236                             | 7.66    | 8.241           | 8.367  | 8.509           | 9.578                   |
| ALS2     | NdcRbriTEi7Xj_7wuE | rs7582228  | 6.58                         | 6.29                                  | -0.13                | 1.17                         | 13.97                         | 0.26   | 8.37   | 0.236                             | 7.66    | 8.241           | 8.367  | 8.509           | 9.578                   |
| ALS2     | NdcRbriTEi7Xj_7wuE | rs2052249  | 6.68                         | 6.39                                  | 0.134                | 1.47                         | 19.49                         | 0.2335 | 8.37   | 0.236                             | 7.66    | 8.241           | 8.367  | 8.509           | 9.578                   |
| ALS2     | NdcRbriTEi7Xj_7wuE | rs12053321 | 6.55                         | 6.26                                  | 0.132                | 1.58                         | 36.49                         | 0.2161 | 8.37   | 0.236                             | 7.66    | 8.241           | 8.367  | 8.509           | 9.578                   |
| ALS2     | NdcRbriTEi7Xj_7wuE | rs11680161 | 3.45                         | 3.30                                  | -0.067               | 0.94                         | 43.17                         | 0.3025 | 8.37   | 0.236                             | 7.66    | 8.241           | 8.367  | 8.509           | 9.578                   |
| ALS2CR15 | iU7VNTJtcQyweVep3U | rs3933629  | 3.92                         | 3.75                                  | 0.075                | 1.74                         | 30                            | 0.485  | 7.304  | 0.105                             | 7.109   | 7.233           | 7.287  | 7.352           | 7.852                   |
| AMACR    | ijdkFVsqIv_7dfoelw | rs2287939  | 5.33                         | 5.09                                  | 0.103                | 3.83                         | -9.32                         | 0.2825 | 7.321  | 0.107                             | 7.109   | 7.25            | 7.317  | 7.394           | 7.609                   |
| AMACR    | T5Vng3Xp4f5666Xzu4 | rs2287939  | 4.18                         | 4.00                                  | 0.08                 | 5.35                         | -9.32                         | 0.2825 | 7.412  | 0.147                             | 7.135   | 7.305           | 7.394  | 7.503           | 7.947                   |
| AMACR    | T5Vng3Xp4f5666Xzu4 | rs10941110 | 4.8                          | 4.59                                  | -0.095               | 2.41                         | -9.13                         | 0.4725 | 7.412  | 0.147                             | 7.135   | 7.305           | 7.394  | 7.503           | 7.947                   |
| AMACR    | T5Vng3Xp4f5666Xzu4 | rs10941112 | 4.99                         | 4.77                                  | 0.1                  | 2.61                         | -3.5                          | 0.4621 | 7.412  | 0.147                             | 7.135   | 7.305           | 7.394  | 7.503           | 7.947                   |
| AMACR    | T5Vng3Xp4f5666Xzu4 | rs253202   | 5.08                         | 4.86                                  | -0.102               | 4.55                         | 6.97                          | 0.2653 | 7.412  | 0.147                             | 7.135   | 7.305           | 7.394  | 7.503           | 7.947                   |
| AMACR    | ijdkFVsqIv_7dfoelw | rs253202   | 4.13                         | 3.95                                  | -0.081               | 2.6                          | 6.97                          | 0.2653 | 7.321  | 0.107                             | 7.109   | 7.25            | 7.317  | 7.394           | 7.609                   |
| AMACR    | ijdkFVsqIv_7dfoelw | rs840381   | 4.07                         | 3.90                                  | 0.078                | 2.14                         | 14.15                         | 0.375  | 7.321  | 0.107                             | 7.109   | 7.25            | 7.317  | 7.394           | 7.609                   |
| AMDHD1   | Zn1SSb0IRNPzESkSqU | rs1436125  | 3.57                         | 3.42                                  | -0.066               | 3.48                         | -37.4                         | 0.485  | 7.433  | 0.163                             | 7.124   | 7.306           | 7.425  | 7.542           | 8.425                   |
| AMDHD1   | Zn1SSb0IRNPzESkSqU | rs4762638  | 3.43                         | 3.28                                  | -0.062               | 5.19                         | -26.43                        | 0.38   | 7.433  | 0.163                             | 7.124   | 7.306           | 7.425  | 7.542           | 8.425                   |
| AMDHD1   | Zn1SSb0IRNPzESkSqU | rs6538685  | 3.65                         | 3.49                                  | -0.068               | 4.21                         | -24.96                        | 0.3317 | 7.433  | 0.163                             | 7.124   | 7.306           | 7.425  | 7.542           | 8.425                   |
| AMDHD1   | Zn1SSb0IRNPzESkSqU | rs10777750 | 3.51                         | 3.36                                  | 0.063                | 5.21                         | -24.5                         | 0.3725 | 7.433  | 0.163                             | 7.124   | 7.306           | 7.425  | 7.542           | 8.425                   |
| AMDHD1   | Zn1SSb0IRNPzESkSqU | rs10161146 | 13.08                        | 12.48                                 | -0.252               | 4.44                         | -13.65                        | 0.3546 | 7.433  | 0.163                             | 7.124   | 7.306           | 7.425  | 7.542           | 8.425                   |
| AMDHD1   | Zn1SSb0IRNPzESkSqU | rs2060548  | 8.46                         | 8.08                                  | -0.169               | 3.4                          | -10.25                        | 0.4825 | 7.433  | 0.163                             | 7.124   | 7.306           | 7.425  | 7.542           | 8.425                   |
| AMDHD1   | Zn1SSb0IRNPzESkSqU | rs10735337 | 7.06                         | 6.75                                  | 0.142                | 2.06                         | -7.14                         | 0.4525 | 7.433  | 0.163                             | 7.124   | 7.306           | 7.425  | 7.542           | 8.425                   |
| AMDHD1   | Zn1SSb0IRNPzESkSqU | rs4762254  | 9.33                         | 8.90                                  | -0.188               | 3.36                         | -6.49                         | 0.4825 | 7.433  | 0.163                             | 7.124   | 7.306           | 7.425  | 7.542           | 8.425                   |
| AMDHD1   | Zn1SSb0IRNPzESkSqU | rs726869   | 9.31                         | 8.89                                  | -0.188               | 3.91                         | -3.54                         | 0.4798 | 7.433  | 0.163                             | 7.124   | 7.306           | 7.425  | 7.542           | 8.425                   |
| AMDHD1   | Zn1SSb0IRNPzESkSqU | rs10859990 | 5.13                         | 4.91                                  | 0.098                | 2.05                         | -1.03                         | 0.3925 | 7.433  | 0.163                             | 7.124   | 7.306           | 7.425  | 7.542           | 8.425                   |
| AMDHD1   | Zn1SSb0IRNPzESkSqU | rs4762651  | 13                           | 12.40                                 | 0.247                | 4.03                         | -12.12                        | 0.3543 | 7.433  | 0.163                             | 7.124   | 7.306           | 7.425  | 7.542           | 8.425                   |
| AMDHD1   | Zn1SSb0IRNPzESkSqU | rs6538691  | 4.2                          | 4.02                                  | 0.079                | 0.98                         | -8.86                         | 0.405  | 7.433  | 0.163                             | 7.124   | 7.306           | 7.425  | 7.542           | 8.425                   |
| AMDHD1   | Zn1SSb0IRNPzESkSqU | rs7487781  | 5.85                         | 5.59                                  | -0.113               | 1.84                         | -6.99                         | 0.4625 | 7.433  | 0.163                             | 7.124   | 7.306           | 7.425  | 7.542           | 8.425                   |
| AMDHD1   | Zn1SSb0IRNPzESkSqU | rs1025607  | 12.22                        | 11.66                                 | -0.233               | 3.61                         | -1.86                         | 0.35   | 7.433  | 0.163                             | 7.124   | 7.306           | 7.425  | 7.542           | 8.425                   |
| AMFR     | ruBcXI_ikIStUdD9A  | rs12930151 | 3.37                         | 3.23                                  | -0.062               | 2.72                         | -22.06                        | 0.303  | 9.018  | 0.45                              | 8.001   | 8.752           | 9.008  | 9.284           | 10.322                  |
| AMFR     | ruBcXI_ikIStUdD9A  | rs2241954  | 4.09                         | 3.91                                  | -0.077               | 1.66                         | -16.39                        | 0.39   | 9.018  | 0.45                              | 8.001   | 8.752           | 9.008  | 9.284           | 10.322                  |
| AMFR     | ruBcXI_ikIStUdD9A  | rs3790112  | 8.76                         | 8.36                                  | 0.169                | 3.05                         | -14.17                        | 0.34   | 9.018  | 0.45                              | 8.001   | 8.752           | 9.008  | 9.284           | 10.322                  |
| AMFR     | ruBcXI_ikIStUdD9A  | rs7206796  | 5.03                         | 4.81                                  | 0.097                | 0.74                         | -14.09                        | 0.1975 | 9.018  | 0.45                              | 8.001   | 8.752           | 9.008  | 9.284           | 10.322                  |
| AMFR     | ruBcXI_ikIStUdD9A  | rs3790113  | 9.55                         | 9.12                                  | -0.187               | 3.11                         | -10.64                        | 0.3636 | 9.018  | 0.45                              | 8.001   | 8.752           | 9.008  | 9.284           | 10.322                  |
| AMFR     | ruBcXI_ikIStUdD9A  | rs899228   | 4.77                         | 4.57                                  | -0.093               | 1.04                         | -8.08                         | 0.201  | 9.018  | 0.45                              | 8.001   | 8.752           | 9.008  | 9.284           | 10.322                  |
| AMFR     | ruBcXI_ikIStUdD9A  | rs899227   | 12.08                        | 11.52                                 | 0.235                | 5.02                         | -7.89                         | 0.3668 | 9.018  | 0.45                              | 8.001   | 8.752           | 9.008  | 9.284           | 10.322                  |
| AMFR     | ruBcXI_ikIStUdD9A  | rs3790116  | 3.57                         | 3.42                                  | 0.067                | 2.5                          | -7.32                         | 0.16   | 9.018  | 0.45                              | 8.001   | 8.752           | 9.008  | 9.284           | 10.322                  |

| Symbol   | Lumi nuID           | SNP        | Population-based association |                           |                      | Family-based association |                               |        | Transcript abundance (log2 scale) |                    |         |                 |        |                 | SNP mapping under probe |
|----------|---------------------|------------|------------------------------|---------------------------|----------------------|--------------------------|-------------------------------|--------|-----------------------------------|--------------------|---------|-----------------|--------|-----------------|-------------------------|
|          |                     |            | p-value (-log10)             | p-value (-log10), GC adj. | % Variance Explained | p-value (-log10)         | Distance from transcript (kb) | MAF    | Mean                              | Standard Deviation | Minimum | 25th percentile | Median | 75th percentile |                         |
| AMFR     | rruBcXI_ikIStUDd9A  | rs4924     | 17.54                        | 16.72                     | 0.328                | 5.02                     | 1.12                          | 0.4369 | 9.018                             | 0.45               | 8.001   | 8.752           | 9.008  | 9.284           | 10.322                  |
| AMFR     | rruBcXI_ikIStUDd9A  | rs2440468  | 17.57                        | 16.75                     | -0.327               | 5.34                     | 25.23                         | 0.4372 | 9.018                             | 0.45               | 8.001   | 8.752           | 9.008  | 9.284           | 10.322                  |
| AMFR     | rruBcXI_ikIStUDd9A  | rs7200888  | 9.24                         | 8.82                      | 0.183                | 1.02                     | -2.72                         | 0.145  | 9.018                             | 0.45               | 8.001   | 8.752           | 9.008  | 9.284           | 10.322                  |
| AMFR     | rruBcXI_ikIStUDd9A  | rs2920706  | 16.21                        | 15.45                     | 0.305                | 5.52                     | -0.82                         | 0.41   | 9.018                             | 0.45               | 8.001   | 8.752           | 9.008  | 9.284           | 10.322                  |
| AMFR     | rruBcXI_ikIStUDd9A  | rs8059717  | 16.03                        | 15.28                     | 0.307                | 4.96                     | 6.12                          | 0.4082 | 9.018                             | 0.45               | 8.001   | 8.752           | 9.008  | 9.284           | 10.322                  |
| AMFR     | rruBcXI_ikIStUDd9A  | rs4784669  | 5.97                         | 5.71                      | -0.116               | 2.17                     | 21.98                         | 0.3894 | 9.018                             | 0.45               | 8.001   | 8.752           | 9.008  | 9.284           | 10.322                  |
| AMFR     | rruBcXI_ikIStUDd9A  | rs4784670  | 13.28                        | 12.67                     | 0.255                | 4.7                      | 39.21                         | 0.3775 | 9.018                             | 0.45               | 8.001   | 8.752           | 9.008  | 9.284           | 10.322                  |
| AMFR     | rruBcXI_ikIStUDd9A  | rs2288055  | 3.69                         | 3.53                      | 0.07                 | 2.12                     | 42.5                          | 0.1725 | 9.018                             | 0.45               | 8.001   | 8.752           | 9.008  | 9.284           | 10.322                  |
| AMFR     | rruBcXI_ikIStUDd9A  | rs16968331 | 6.09                         | 5.82                      | 0.124                | 1.43                     | 46.47                         | 0.0825 | 9.018                             | 0.45               | 8.001   | 8.752           | 9.008  | 9.284           | 10.322                  |
| AMPD3    | xlSn.XnenR550SM5AE  | rs10840415 | 5.01                         | 4.79                      | 0.1                  | 1.16                     | -12.57                        | 0.1375 | 7.173                             | 0.057              | 7.106   | 7.136           | 7.155  | 7.185           | 7.424                   |
| AMPH     | x3oX6DoR2p4oLloopl  | rs2299945  | 3.35                         | 3.21                      | 0.067                | 0.32                     | 18.34                         | 0.345  | 7.138                             | 0.022              | 7.105   | 7.124           | 7.134  | 7.145           | 7.285                   |
| ANK2     | ZBWC8R4hBlISlipYo   | rs17590572 | 4.71                         | 4.51                      | -0.098               | 0.93                     | 109.37                        | 0.2075 | 7.411                             | 0.186              | 7.162   | 7.288           | 7.365  | 7.483           | 8.244                   |
| ANK2     | ZBWC8R4hBlISlipYo   | rs400883   | 3.64                         | 3.49                      | -0.073               | 0.56                     | 112.87                        | 0.21   | 7.411                             | 0.186              | 7.162   | 7.288           | 7.365  | 7.483           | 8.244                   |
| ANKDD1A  | u2qAe7ueCLG6id3uc0  | rs1719271  | 4.74                         | 4.54                      | -0.09                | 2.96                     | -30.32                        | 0.1759 | 8.278                             | 0.645              | 7.191   | 7.655           | 8.317  | 8.719           | 9.772                   |
| ANKDD1A  | u2qAe7ueCLG6id3uc0  | rs1628955  | 61.01                        | 58.07                     | 0.76                 | 11.82                    | -26.91                        | 0.3869 | 8.278                             | 0.645              | 7.191   | 7.655           | 8.317  | 8.719           | 9.772                   |
| ANKDD1A  | u2qAe7ueCLG6id3uc0  | rs1631677  | 4.98                         | 4.77                      | -0.095               | 3.15                     | -15.54                        | 0.175  | 8.278                             | 0.645              | 7.191   | 7.655           | 8.317  | 8.719           | 9.772                   |
| ANKDD1A  | u2qAe7ueCLG6id3uc0  | rs1471834  | 9.34                         | 8.92                      | 0.181                | 5.85                     | -5.9                          | 0.2225 | 8.278                             | 0.645              | 7.191   | 7.655           | 8.317  | 8.719           | 9.772                   |
| ANKDD1A  | u2qAe7ueCLG6id3uc0  | rs2056497  | 5.76                         | 5.50                      | -0.111               | 5.02                     | -4.25                         | 0.1859 | 8.278                             | 0.645              | 7.191   | 7.655           | 8.317  | 8.719           | 9.772                   |
| ANKDD1A  | u2qAe7ueCLG6id3uc0  | rs4287512  | 9.17                         | 8.75                      | -0.179               | 5.13                     | -3.98                         | 0.4275 | 8.278                             | 0.645              | 7.191   | 7.655           | 8.317  | 8.719           | 9.772                   |
| ANKDD1A  | u2qAe7ueCLG6id3uc0  | rs12438783 | 3.8                          | 3.63                      | 0.073                | 2.58                     | 9.36                          | 0.2487 | 8.278                             | 0.645              | 7.191   | 7.655           | 8.317  | 8.719           | 9.772                   |
| ANKK1    | QullHerr3CUoliOgPyE | rs1055075  | 3.53                         | 3.38                      | -0.062               | 2.25                     | -19                           | 0.3325 | 7.314                             | 0.19               | 7.101   | 7.184           | 7.251  | 7.384           | 8.434                   |
| ANKK1    | QullHerr3CUoliOgPyE | rs11214589 | 3.69                         | 3.53                      | -0.066               | 3.18                     | -13.46                        | 0.455  | 7.314                             | 0.19               | 7.101   | 7.184           | 7.251  | 7.384           | 8.434                   |
| ANKMY1   | KeRf6rTn_yS7dX5hdk  | rs3821348  | 8.74                         | 8.34                      | -0.179               | 4.11                     | -33.95                        | 0.165  | 9.368                             | 0.429              | 8.166   | 9.102           | 9.39   | 9.66            | 10.46                   |
| ANKMY1   | KeRf6rTn_yS7dX5hdk  | rs3749164  | 4.29                         | 4.10                      | -0.086               | 2.02                     | 28.29                         | 0.1225 | 9.368                             | 0.429              | 8.166   | 9.102           | 9.39   | 9.66            | 10.46                   |
| ANKRD16  | H16peVLe4nlO_Ms0SM  | rs7098372  | 3.92                         | 3.75                      | -0.074               | 1.47                     | -17.54                        | 0.42   | 7.567                             | 0.182              | 7.17    | 7.442           | 7.543  | 7.647           | 8.173                   |
| ANKRD16  | H16peVLe4nlO_Ms0SM  | rs2380205  | 3.75                         | 3.59                      | 0.071                | 1.47                     | -16.96                        | 0.4171 | 7.567                             | 0.182              | 7.17    | 7.442           | 7.543  | 7.647           | 8.173                   |
| ANKRD16  | H16peVLe4nlO_Ms0SM  | rs7894083  | 3.92                         | 3.75                      | 0.074                | 1.33                     | -10.42                        | 0.42   | 7.567                             | 0.182              | 7.17    | 7.442           | 7.543  | 7.647           | 8.173                   |
| ANKRD16  | H16peVLe4nlO_Ms0SM  | rs7072174  | 3.76                         | 3.60                      | -0.071               | 1.35                     | -4.89                         | 0.4225 | 7.567                             | 0.182              | 7.17    | 7.442           | 7.543  | 7.647           | 8.173                   |
| ANKRD16  | H16peVLe4nlO_Ms0SM  | rs907685   | 3.92                         | 3.75                      | 0.074                | 1.47                     | -3.36                         | 0.42   | 7.567                             | 0.182              | 7.17    | 7.442           | 7.543  | 7.647           | 8.173                   |
| ANKRD16  | H16peVLe4nlO_Ms0SM  | rs907686   | 3.9                          | 3.74                      | -0.074               | 1.6                      | -3                            | 0.4196 | 7.567                             | 0.182              | 7.17    | 7.442           | 7.543  | 7.647           | 8.173                   |
| ANKRD16  | H16peVLe4nlO_Ms0SM  | rs907688   | 3.92                         | 3.75                      | 0.074                | 1.47                     | -2.87                         | 0.42   | 7.567                             | 0.182              | 7.17    | 7.442           | 7.543  | 7.647           | 8.173                   |
| ANKRD16  | H16peVLe4nlO_Ms0SM  | rs907689   | 3.92                         | 3.75                      | -0.074               | 1.47                     | -2.72                         | 0.42   | 7.567                             | 0.182              | 7.17    | 7.442           | 7.543  | 7.647           | 8.173                   |
| ANKRD16  | H16peVLe4nlO_Ms0SM  | rs12359234 | 4.45                         | 4.26                      | 0.084                | 2.11                     | -0.98                         | 0.375  | 7.567                             | 0.182              | 7.17    | 7.442           | 7.543  | 7.647           | 8.173                   |
| ANKRD16  | H16peVLe4nlO_Ms0SM  | rs2203197  | 3.92                         | 3.75                      | 0.074                | 1.59                     | 1.23                          | 0.42   | 7.567                             | 0.182              | 7.17    | 7.442           | 7.543  | 7.647           | 8.173                   |
| ANKRD16  | H16peVLe4nlO_Ms0SM  | rs591878   | 4.27                         | 4.09                      | -0.083               | 2.35                     | 4.09                          | 0.49   | 7.567                             | 0.182              | 7.17    | 7.442           | 7.543  | 7.647           | 8.173                   |
| ANKRD16  | H16peVLe4nlO_Ms0SM  | rs636578   | 4.23                         | 4.05                      | 0.082                | 2.16                     | 7.2                           | 0.4975 | 7.567                             | 0.182              | 7.17    | 7.442           | 7.543  | 7.647           | 8.173                   |
| ANKRD16  | H16peVLe4nlO_Ms0SM  | rs6602330  | 3.51                         | 3.36                      | -0.065               | 2.2                      | 12.89                         | 0.3175 | 7.567                             | 0.182              | 7.17    | 7.442           | 7.543  | 7.647           | 8.173                   |
| ANKRD16  | H16peVLe4nlO_Ms0SM  | rs649537   | 4.38                         | 4.19                      | 0.086                | 2.63                     | 14.33                         | 0.4975 | 7.567                             | 0.182              | 7.17    | 7.442           | 7.543  | 7.647           | 8.173                   |
| ANKRD16  | H16peVLe4nlO_Ms0SM  | rs12774228 | 3.5                          | 3.35                      | 0.065                | 2.08                     | 45.93                         | 0.3125 | 7.567                             | 0.182              | 7.17    | 7.442           | 7.543  | 7.647           | 8.173                   |
| ANKRD26  | ff70Ud0cUpS06JRfu4  | rs10829163 | 3.68                         | 3.52                      | 0.067                | 0.9                      | 23.4                          | 0.1425 | 7.63                              | 0.166              | 7.319   | 7.521           | 7.6    | 7.721           | 8.221                   |
| ANKRD26  | ff70Ud0cUpS06JRfu4  | rs2297145  | 3.51                         | 3.37                      | -0.065               | 0.77                     | -8.06                         | 0.145  | 7.63                              | 0.166              | 7.319   | 7.521           | 7.6    | 7.721           | 8.221                   |
| ANKRD26  | ff70Ud0cUpS06JRfu4  | rs7086311  | 3.63                         | 3.48                      | -0.067               | 0.72                     | 2.6                           | 0.16   | 7.63                              | 0.166              | 7.319   | 7.521           | 7.6    | 7.721           | 8.221                   |
| ANKRD26  | ff70Ud0cUpS06JRfu4  | rs12255977 | 3.84                         | 3.68                      | -0.071               | 0.84                     | 29.8                          | 0.16   | 7.63                              | 0.166              | 7.319   | 7.521           | 7.6    | 7.721           | 8.221                   |
| ANKRD26  | ff70Ud0cUpS06JRfu4  | rs10829194 | 3.84                         | 3.68                      | -0.071               | 0.84                     | 36.04                         | 0.16   | 7.63                              | 0.166              | 7.319   | 7.521           | 7.6    | 7.721           | 8.221                   |
| ANKRD26  | ff70Ud0cUpS06JRfu4  | rs2274634  | 3.6                          | 3.45                      | -0.066               | 0.76                     | 45.08                         | 0.1625 | 7.63                              | 0.166              | 7.319   | 7.521           | 7.6    | 7.721           | 8.221                   |
| ANKRD5   | WrKc0oLkp6ATkontXg  | rs724675   | 3.58                         | 3.43                      | 0.068                | 0.49                     | -25.45                        | 0.1633 | 8.761                             | 0.262              | 7.911   | 8.618           | 8.804  | 8.947           | 9.295                   |
| ANKRD5   | WrKc0oLkp6ATkontXg  | rs6057073  | 4.05                         | 3.88                      | -0.078               | 0.52                     | -24.45                        | 0.255  | 8.761                             | 0.262              | 7.911   | 8.618           | 8.804  | 8.947           | 9.295                   |
| ANKRD5   | WrKc0oLkp6ATkontXg  | rs725565   | 3.81                         | 3.66                      | 0.074                | 0.53                     | -10.69                        | 0.26   | 8.761                             | 0.262              | 7.911   | 8.618           | 8.804  | 8.947           | 9.295                   |
| ANKRD5   | WrKc0oLkp6ATkontXg  | rs6087119  | 3.93                         | 3.74                      | 0.075                | 1.14                     | -1.21                         | 0.1231 | 8.761                             | 0.262              | 7.911   | 8.618           | 8.804  | 8.947           | 9.295                   |
| ANKRD5   | WrKc0oLkp6ATkontXg  | rs633841   | 5.51                         | 5.27                      | 0.111                | 0.51                     | 5.42                          | 0.2825 | 8.761                             | 0.262              | 7.911   | 8.618           | 8.804  | 8.947           | 9.295                   |
| ANKRD5   | WrKc0oLkp6ATkontXg  | rs674630   | 3.91                         | 3.74                      | 0.076                | 0.17                     | 7.67                          | 0.4525 | 8.761                             | 0.262              | 7.911   | 8.618           | 8.804  | 8.947           | 9.295                   |
| ANXA11   | ZrJe5N64u7Rif7x5QE  | rs3000954  | 3.93                         | 3.77                      | -0.078               | 0.14                     | 7.06                          | 0.1307 | 10.273                            | 0.343              | 9.4     | 10.028          | 10.26  | 10.508          | 11.203                  |
| ANXA9    | ZOS4CqPILSV16X7kqç  | rs7521445  | 4.13                         | 3.95                      | -0.081               | 0.87                     | -35.72                        | 0.11   | 7.159                             | 0.048              | 7.099   | 7.128           | 7.145  | 7.178           | 7.44                    |
| AP1M1    | WG3mfrRW11UV7u787Q  | rs897775   | 3.55                         | 3.40                      | -0.068               | 0.72                     | -26.21                        | 0.2702 | 10.948                            | 0.264              | 10.271  | 10.764          | 10.971 | 11.101          | 11.954                  |
| AP1M1    | WG3mfrRW11UV7u787Q  | rs285236   | 4.03                         | 3.86                      | -0.079               | 1.83                     | -9.56                         | 0.1725 | 10.948                            | 0.264              | 10.271  | 10.764          | 10.971 | 11.101          | 11.954                  |
| APOBEC3H | c5dMI5617CQkcJ1EuU  | rs738469   | 3.81                         | 3.65                      | -0.072               | 1.45                     | 10.99                         | 0.0875 | 7.858                             | 0.292              | 7.173   | 7.655           | 7.829  | 8.056           | 8.699                   |
| APOL1    | WpJRSilzi6SqUQQDKa  | rs713753   | 3.76                         | 3.60                      | 0.074                | 3.4                      | -5.04                         | 0.405  | 7.262                             | 0.111              | 7.108   | 7.185           | 7.243  | 7.307           | 7.762                   |
| APOL2    | 0viKvvgpVlSkOJloFM  | rs7364143  | 4.45                         | 4.26                      | 0.088                | 0.84                     | -20.07                        | 0.275  | 7.473                             | 0.164              | 7.17    | 7.363           | 7.453  | 7.581           | 7.998                   |
| APOL2    | 0viKvvgpVlSkOJloFM  | rs1315     | 5.35                         | 5.18                      | 0.109                | 1.02                     | -6.12                         | 0.2362 | 7.473                             | 0.164              | 7.17    | 7.363           | 7.453  | 7.581           | 7.998                   |
| APOL2    | 0viKvvgpVlSkOJloFM  | rs11089784 | 5.33                         | 5.15                      | 0.115                | 1.22                     | 4.02                          | 0.235  | 7.473                             | 0.164              | 7.17    | 7.363           | 7.453  | 7.581           | 7.998                   |
| APOL2    | 0viKvvgpVlSkOJloFM  | rs136142   | 3.91                         | 3.74                      | 0.077                | 0.82                     | -2.98                         | 0.415  | 7.473                             | 0.164              | 7.17    | 7.363           | 7.453  | 7.581           | 7.998                   |
| APOLD1   | 9kJPNChn_OR_V2pF4   | rs7956578  | 3.3                          | 3.16                      | -0.063               | 1.08                     | -6.33                         | 0.4325 | 7.195                             | 0.08               | 7.097   | 7.134           | 7.169  | 7.232           | 7.597                   |

| Symbol   | Lumi nuID           | SNP        | Population-based association |                  | % Variance Explained | Family-based association |                               | Transcript abundance (log2 scale) |        |                    |         |                 |        |                 | SNP mapping under probe |         |
|----------|---------------------|------------|------------------------------|------------------|----------------------|--------------------------|-------------------------------|-----------------------------------|--------|--------------------|---------|-----------------|--------|-----------------|-------------------------|---------|
|          |                     |            | p-value (-log10)             | p-value (-log10) |                      | p-value (-log10)         | Distance from transcript (kb) | MAF                               | Mean   | Standard Deviation | Minimum | 25th percentile | Median | 75th percentile |                         | Maximum |
| AQP3     | in3Ep.6gsq6O6sgeoo  | rs4879704  | 3.52                         | 3.37             | -0.066               | 0.88                     | -13.84                        | 0.3081                            | 9.247  | 0.506              | 7.751   | 8.909           | 9.25   | 9.589           | 10.532                  |         |
| AQP9     | ui8QkUajncTQqORfS0  | rs12441254 | 3.61                         | 3.46             | -0.07                | 1.77                     | 13.35                         | 0.185                             | 8.36   | 0.922              | 7.121   | 7.569           | 8.092  | 9.047           | 11.332                  |         |
| AQP9     | ui8QkUajncTQqORfS0  | rs4775014  | 3.48                         | 3.33             | -0.067               | 1.32                     | 14.08                         | 0.1834                            | 8.36   | 0.922              | 7.121   | 7.569           | 8.092  | 9.047           | 11.332                  |         |
| ARG1     | 0IVMTluod_g0ohAnFE  | rs2246012  | 3.87                         | 3.70             | 0.074                | 2.27                     | 3.84                          | 0.145                             | 7.24   | 0.153              | 7.107   | 7.144           | 7.189  | 7.284           | 8.25                    |         |
| ARG1     | 0IVMTluod_g0ohAnFE  | rs2245133  | 3.87                         | 3.70             | 0.074                | 2.1                      | 25.62                         | 0.145                             | 7.24   | 0.153              | 7.107   | 7.144           | 7.189  | 7.284           | 8.25                    |         |
| ARHGAP12 | Zov8v.JoLS9Kk.yp7fk | rs2778668  | 3.77                         | 3.61             | 0.072                | 0.64                     | -41.41                        | 0.2875                            | 8.572  | 0.314              | 7.204   | 8.414           | 8.6    | 8.768           | 9.543                   |         |
| ARHGAP21 | rk4ofDg1AXu05e7kxU  | rs10828675 | 3.92                         | 3.76             | -0.076               | 0.81                     | -3.44                         | 0.48                              | 9.321  | 0.357              | 8.235   | 9.111           | 9.328  | 9.557           | 10.336                  |         |
| ARHGAP21 | rk4ofDg1AXu05e7kxU  | rs10828681 | 3.38                         | 3.24             | -0.064               | 0.43                     | 61.41                         | 0.47                              | 9.321  | 0.357              | 8.235   | 9.111           | 9.328  | 9.557           | 10.336                  |         |
| ARHGAP21 | rk4ofDg1AXu05e7kxU  | rs11014191 | 3.38                         | 3.24             | 0.064                | 0.43                     | 62.66                         | 0.47                              | 9.321  | 0.357              | 8.235   | 9.111           | 9.328  | 9.557           | 10.336                  |         |
| ARHGAP21 | rk4ofDg1AXu05e7kxU  | rs4147179  | 3.6                          | 3.45             | -0.069               | 0.52                     | 67.12                         | 0.47                              | 9.321  | 0.357              | 8.235   | 9.111           | 9.328  | 9.557           | 10.336                  |         |
| ARHGAP21 | rk4ofDg1AXu05e7kxU  | rs2886854  | 3.43                         | 3.28             | -0.065               | 0.46                     | -37.39                        | 0.475                             | 9.321  | 0.357              | 8.235   | 9.111           | 9.328  | 9.557           | 10.336                  |         |
| ARHGAP21 | rk4ofDg1AXu05e7kxU  | rs10734055 | 3.42                         | 3.27             | 0.065                | 0.47                     | -15.83                        | 0.4675                            | 9.321  | 0.357              | 8.235   | 9.111           | 9.328  | 9.557           | 10.336                  |         |
| ARHGAP21 | rk4ofDg1AXu05e7kxU  | rs7073062  | 3.73                         | 3.57             | 0.072                | 0.57                     | 13.38                         | 0.4025                            | 9.321  | 0.357              | 8.235   | 9.111           | 9.328  | 9.557           | 10.336                  |         |
| ARHGAP9  | 6i3N9OLuH4rvqOriok  | rs2127318  | 3.76                         | 3.60             | -0.07                | 1.22                     | 37.66                         | 0.14                              | 12.212 | 0.268              | 11.52   | 12.035          | 12.238 | 12.394          | 12.933                  |         |
| ARHGAP9  | 6i3N9OLuH4rvqOriok  | rs1284605  | 3.76                         | 3.60             | -0.07                | 1.22                     | 38.59                         | 0.14                              | 12.212 | 0.268              | 11.52   | 12.035          | 12.238 | 12.394          | 12.933                  |         |
| ARHGAP9  | 6i3N9OLuH4rvqOriok  | rs703837   | 3.76                         | 3.60             | 0.07                 | 1.22                     | 43.88                         | 0.14                              | 12.212 | 0.268              | 11.52   | 12.035          | 12.238 | 12.394          | 12.933                  |         |
| ARHGAF10 | ZeS_SJSVZulG5MOLkQ  | rs7007884  | 4.5                          | 4.31             | -0.09                | 2.99                     | 35.61                         | 0.3325                            | 7.6    | 0.304              | 7.139   | 7.393           | 7.529  | 7.762           | 8.747                   |         |
| ARHGAF15 | uTjFlpioSISQp1S6c   | rs2313148  | 4.47                         | 4.28             | -0.089               | 0.38                     | 26.02                         | 0.3475                            | 7.223  | 0.085              | 7.103   | 7.174           | 7.201  | 7.272           | 7.644                   |         |
| ARHGAF7  | Tept6hfg5eV6_7odfA  | rs2296354  | 3.41                         | 3.27             | -0.064               | 1.08                     | 63.95                         | 0.1675                            | 10.502 | 0.23               | 10.085  | 10.349          | 10.457 | 10.64           | 11.528                  |         |
| ARHGAF7  | Tept6hfg5eV6_7odfA  | rs3783085  | 3.89                         | 3.73             | -0.073               | 1.07                     | -36.1                         | 0.15                              | 10.502 | 0.23               | 10.085  | 10.349          | 10.457 | 10.64           | 11.528                  |         |
| ARHGAF7  | Tept6hfg5eV6_7odfA  | rs2477471  | 4.33                         | 4.15             | -0.083               | 0.84                     | 28.3                          | 0.2625                            | 10.502 | 0.23               | 10.085  | 10.349          | 10.457 | 10.64           | 11.528                  |         |
| ARL3     | ThFO0V0Uodt3U9W0i8  | rs17114803 | 4.15                         | 3.97             | -0.078               | 1.52                     | -46.55                        | 0.1075                            | 7.53   | 0.142              | 7.245   | 7.428           | 7.52   | 7.625           | 8.024                   |         |
| ARL3     | ThFO0V0Uodt3U9W0i8  | rs4146429  | 4.15                         | 3.97             | -0.078               | 1.52                     | -31.86                        | 0.1075                            | 7.53   | 0.142              | 7.245   | 7.428           | 7.52   | 7.625           | 8.024                   |         |
| ARL3     | ThFO0V0Uodt3U9W0i8  | rs10883766 | 4.41                         | 4.22             | -0.084               | 1.31                     | -9.43                         | 0.1125                            | 7.53   | 0.142              | 7.245   | 7.428           | 7.52   | 7.625           | 8.024                   |         |
| ARL4     | 6iUyy9l3nyO4Sk_Cns  | rs13226473 | 3.58                         | 3.42             | -0.069               | 2.82                     | -18.46                        | 0.2275                            | 7.938  | 0.332              | 7.141   | 7.705           | 7.913  | 8.15            | 9.37                    |         |
| ARL4     | 6iUyy9l3nyO4Sk_Cns  | rs4721127  | 3.55                         | 3.40             | 0.068                | 2.63                     | -17.96                        | 0.1675                            | 7.938  | 0.332              | 7.141   | 7.705           | 7.913  | 8.15            | 9.37                    |         |
| ARL4     | 6iUyy9l3nyO4Sk_Cns  | rs6952054  | 3.34                         | 3.20             | -0.062               | 3.54                     | -14.66                        | 0.2725                            | 7.938  | 0.332              | 7.141   | 7.705           | 7.913  | 8.15            | 9.37                    |         |
| ARL4     | 6iUyy9l3nyO4Sk_Cns  | rs10488226 | 4.8                          | 4.59             | -0.092               | 4.75                     | -13.89                        | 0.4025                            | 7.938  | 0.332              | 7.141   | 7.705           | 7.913  | 8.15            | 9.37                    |         |
| ARL4     | 6iUyy9l3nyO4Sk_Cns  | rs7810893  | 4.77                         | 4.57             | 0.097                | 1.45                     | 30.48                         | 0.395                             | 7.938  | 0.332              | 7.141   | 7.705           | 7.913  | 8.15            | 9.37                    |         |
| ARL4     | 9nCegq581ebIBI5Q58  | rs7810893  | 3.31                         | 3.17             | 0.062                | 0.75                     | 30.48                         | 0.395                             | 7.354  | 0.154              | 7.103   | 7.218           | 7.337  | 7.462           | 7.893                   |         |
| ARL4     | 6iUyy9l3nyO4Sk_Cns  | rs17166325 | 4.57                         | 4.37             | -0.092               | 1.69                     | 31.68                         | 0.43                              | 7.938  | 0.332              | 7.141   | 7.705           | 7.913  | 8.15            | 9.37                    |         |
| ARL4     | 6iUyy9l3nyO4Sk_Cns  | rs6956267  | 5.12                         | 4.89             | -0.102               | 2.49                     | 34.95                         | 0.3075                            | 7.938  | 0.332              | 7.141   | 7.705           | 7.913  | 8.15            | 9.37                    |         |
| ARL4     | 6iUyy9l3nyO4Sk_Cns  | rs6949193  | 5.03                         | 4.81             | 0.1                  | 2.52                     | 37.02                         | 0.31                              | 7.938  | 0.332              | 7.141   | 7.705           | 7.913  | 8.15            | 9.37                    |         |
| ARL4     | 6iUyy9l3nyO4Sk_Cns  | rs6460976  | 5.03                         | 4.81             | 0.1                  | 2.52                     | 40.27                         | 0.31                              | 7.938  | 0.332              | 7.141   | 7.705           | 7.913  | 8.15            | 9.37                    |         |
| ARNT     | oJRPkZdVXR_11414RM  | rs7412746  | 15.11                        | 14.41            | -0.294               | 4.2                      | 11.29                         | 0.4874                            | 8.214  | 0.299              | 7.546   | 8.037           | 8.2    | 8.393           | 9.132                   |         |
| ARSA     | 3RKQiv2kt3fvcVtcVI  | rs8142033  | 6.51                         | 6.22             | 0.131                | 2.8                      | -0.62                         | 0.0875                            | 7.942  | 0.389              | 7.126   | 7.72            | 7.857  | 8.122           | 9.5                     |         |
| ARSA     | 3RKQiv2kt3fvcVtcVI  | rs2071421  | 5.27                         | 5.04             | 0.107                | 2.94                     | 0.97                          | 0.1375                            | 7.942  | 0.389              | 7.126   | 7.72            | 7.857  | 8.122           | 9.5                     |         |
| ARSG     | cvJfkzV97Ne1ddRlhU  | rs2160725  | 3.54                         | 3.39             | 0.069                | 0.69                     | -21.27                        | 0.4675                            | 7.922  | 0.182              | 7.499   | 7.792           | 7.908  | 8.017           | 8.62                    |         |
| ARTS-1   | N3VAwjuefFis0arqnU  | rs149313   | 9.31                         | 8.88             | -0.181               | 3.51                     | -26.32                        | 0.4775                            | 7.415  | 0.211              | 7.1     | 7.244           | 7.374  | 7.569           | 8.032                   |         |
| ARTS-1   | N3VAwjuefFis0arqnU  | rs13362120 | 14.66                        | 13.98            | -0.281               | 3.16                     | -25.33                        | 0.335                             | 7.415  | 0.211              | 7.1     | 7.244           | 7.374  | 7.569           | 8.032                   |         |
| ARTS-1   | N3VAwjuefFis0arqnU  | rs10037212 | 26.26                        | 25.02            | -0.455               | 5.91                     | -11.74                        | 0.3375                            | 7.415  | 0.211              | 7.1     | 7.244           | 7.374  | 7.569           | 8.032                   |         |
| ARTS-1   | N3VAwjuefFis0arqnU  | rs1862609  | 26.12                        | 24.88            | -0.455               | 5.42                     | -9.83                         | 0.3367                            | 7.415  | 0.211              | 7.1     | 7.244           | 7.374  | 7.569           | 8.032                   |         |
| ARTS-1   | N3VAwjuefFis0arqnU  | rs27037    | 7.48                         | 7.14             | -0.144               | 3.74                     | -1.83                         | 0.2875                            | 7.415  | 0.211              | 7.1     | 7.244           | 7.374  | 7.569           | 8.032                   |         |
| ARTS-1   | N3VAwjuefFis0arqnU  | rs27524    | 8.99                         | 8.58             | 0.178                | 5.42                     | 5.42                          | 0.3788                            | 7.415  | 0.211              | 7.1     | 7.244           | 7.374  | 7.569           | 8.032                   |         |
| ARTS-1   | N3VAwjuefFis0arqnU  | rs25862    | 12.54                        | 11.96            | -0.241               | 2.41                     | 8.31                          | 0.49                              | 7.415  | 0.211              | 7.1     | 7.244           | 7.374  | 7.569           | 8.032                   |         |
| ARTS-1   | N3VAwjuefFis0arqnU  | rs11135480 | 4.03                         | 3.86             | 0.073                | 1.38                     | 14.06                         | 0.1475                            | 7.415  | 0.211              | 7.1     | 7.244           | 7.374  | 7.569           | 8.032                   |         |
| ARTS-1   | N3VAwjuefFis0arqnU  | rs13160562 | 27.64                        | 26.33            | -0.474               | 5.45                     | 14.85                         | 0.3275                            | 7.415  | 0.211              | 7.1     | 7.244           | 7.374  | 7.569           | 8.032                   |         |
| ARTS-1   | N3VAwjuefFis0arqnU  | rs10515247 | 4.03                         | 3.86             | 0.073                | 1.38                     | 15.21                         | 0.1475                            | 7.415  | 0.211              | 7.1     | 7.244           | 7.374  | 7.569           | 8.032                   |         |
| ARTS-1   | N3VAwjuefFis0arqnU  | rs10515248 | 4.03                         | 3.86             | -0.073               | 1.38                     | 15.48                         | 0.1475                            | 7.415  | 0.211              | 7.1     | 7.244           | 7.374  | 7.569           | 8.032                   |         |
| ARTS-1   | N3VAwjuefFis0arqnU  | rs27042    | 3.42                         | 3.27             | 0.063                | 0.82                     | 20.42                         | 0.3525                            | 7.415  | 0.211              | 7.1     | 7.244           | 7.374  | 7.569           | 8.032                   |         |
| ARTS-1   | N3VAwjuefFis0arqnU  | rs10050860 | 13.24                        | 12.63            | 0.25                 | 2.4                      | -21.43                        | 0.22                              | 7.415  | 0.211              | 7.1     | 7.244           | 7.374  | 7.569           | 8.032                   |         |
| ARTS-1   | N3VAwjuefFis0arqnU  | rs13154629 | 13.24                        | 12.63            | 0.25                 | 2.4                      | -21.18                        | 0.22                              | 7.415  | 0.211              | 7.1     | 7.244           | 7.374  | 7.569           | 8.032                   |         |
| ARTS-1   | N3VAwjuefFis0arqnU  | rs30187    | 8.46                         | 8.08             | -0.164               | 3.86                     | -19.31                        | 0.3775                            | 7.415  | 0.211              | 7.1     | 7.244           | 7.374  | 7.569           | 8.032                   |         |
| ARTS-1   | N3VAwjuefFis0arqnU  | rs25866    | 5.39                         | 5.15             | 0.102                | 1.28                     | -12.61                        | 0.25                              | 7.415  | 0.211              | 7.1     | 7.244           | 7.374  | 7.569           | 8.032                   |         |
| ARTS-1   | N3VAwjuefFis0arqnU  | rs34753    | 3.75                         | 3.59             | 0.07                 | 2.27                     | 7.27                          | 0.299                             | 7.415  | 0.211              | 7.1     | 7.244           | 7.374  | 7.569           | 8.032                   |         |
| ARTS-1   | N3VAwjuefFis0arqnU  | rs28129    | 3.83                         | 3.66             | -0.071               | 2.38                     | 11.88                         | 0.3025                            | 7.415  | 0.211              | 7.1     | 7.244           | 7.374  | 7.569           | 8.032                   |         |
| ARTS-1   | N3VAwjuefFis0arqnU  | rs41135    | 4.76                         | 4.55             | -0.088               | 1.58                     | 22.38                         | 0.44                              | 7.415  | 0.211              | 7.1     | 7.244           | 7.374  | 7.569           | 8.032                   |         |
| ARTS-1   | N3VAwjuefFis0arqnU  | rs11748795 | 3.88                         | 3.72             | -0.071               | 1.29                     | 24.41                         | 0.1439                            | 7.415  | 0.211              | 7.1     | 7.244           | 7.374  | 7.569           | 8.032                   |         |
| ARTS-1   | N3VAwjuefFis0arqnU  | rs10476692 | 3.47                         | 3.32             | -0.063               | 0.22                     | 26.25                         | 0.0725                            | 7.415  | 0.211              | 7.1     | 7.244           | 7.374  | 7.569           | 8.032                   |         |
| ARTS-1   | N3VAwjuefFis0arqnU  | rs2911132  | 14.08                        | 13.43            | -0.267               | 2.42                     | 43.35                         | 0.3925                            | 7.415  | 0.211              | 7.1     | 7.244           | 7.374  | 7.569           | 8.032                   |         |
| ARTS-1   | N3VAwjuefFis0arqnU  | rs11750671 | 3.54                         | 3.39             | -0.064               | 1.06                     | 44.84                         | 0.145                             | 7.415  | 0.211              | 7.1     | 7.244           | 7.374  | 7.569           | 8.032                   |         |
| ARTS-1   | N3VAwjuefFis0arqnU  | rs2042381  | 5.98                         | 5.71             | 0.115                | 2.3                      | 45.02                         | 0.2889                            | 7.415  | 0.211              | 7.1     | 7.244           | 7.374  | 7.569           | 8.032                   |         |

| Symbol    | Lumi nuID          | SNP        | Population-based association |                  | % Variance Explained | Family-based association |                               | Transcript abundance (log2 scale) |        |                    |         |                 |        |                 | SNP mapping under probe |         |
|-----------|--------------------|------------|------------------------------|------------------|----------------------|--------------------------|-------------------------------|-----------------------------------|--------|--------------------|---------|-----------------|--------|-----------------|-------------------------|---------|
|           |                    |            | p-value (-log10)             | p-value (-log10) |                      | p-value (-log10)         | Distance from transcript (kb) | MAF                               | Mean   | Standard Deviation | Minimum | 25th percentile | Median | 75th percentile |                         | Maximum |
| ASAHL     | QxhR6CUKVCgihalE3k | rs6826085  | 5.22                         | 4.99             | 0.104                | 3.74                     | 8.08                          | 0.4475                            | 10.032 | 0.417              | 8.23    | 9.785           | 9.991  | 10.269          | 11.42                   |         |
| ASAHL     | QxhR6CUKVCgihalE3k | rs1554015  | 5.5                          | 5.26             | -0.112               | 2.76                     | 26.95                         | 0.0625                            | 10.032 | 0.417              | 8.23    | 9.785           | 9.991  | 10.269          | 11.42                   |         |
| ASB1      | Wqjoh7qQl77.6VXvs  | rs472357   | 3.31                         | 3.17             | 0.062                | 0.13                     | -5.44                         | 0.3875                            | 9.544  | 0.279              | 8.752   | 9.376           | 9.555  | 9.736           | 10.444                  |         |
| ASB6      | xnVIIH9XecgtVECn0  | rs11793700 | 4.23                         | 4.05             | -0.08                | 0.9                      | 12.47                         | 0.1175                            | 8.565  | 0.423              | 7.701   | 8.245           | 8.532  | 8.871           | 9.643                   |         |
| ASCC1     | ZubFEd711NLgR_n59c | rs1245548  | 6.3                          | 6.02             | 0.126                | 2.89                     | -10.39                        | 0.495                             | 9.542  | 0.187              | 9.091   | 9.397           | 9.541  | 9.659           | 9.966                   |         |
| ASCC1     | ZubFEd711NLgR_n59c | rs1678614  | 6.33                         | 6.05             | 0.127                | 3.36                     | 18.78                         | 0.4725                            | 9.542  | 0.187              | 9.091   | 9.397           | 9.541  | 9.659           | 9.966                   |         |
| ASCC1     | ZubFEd711NLgR_n59c | rs3780948  | 6.33                         | 6.05             | -0.127               | 3.36                     | 30.03                         | 0.4725                            | 9.542  | 0.187              | 9.091   | 9.397           | 9.541  | 9.659           | 9.966                   |         |
| ASCC1     | ZubFEd711NLgR_n59c | rs1668157  | 6.46                         | 6.17             | -0.131               | 3.51                     | 49.87                         | 0.4775                            | 9.542  | 0.187              | 9.091   | 9.397           | 9.541  | 9.659           | 9.966                   |         |
| ASNSD1    | Ne6B_t8SXed95UBqU4 | rs7568449  | 3.49                         | 3.34             | 0.066                | 0.76                     | -5.09                         | 0.2425                            | 10.631 | 0.23               | 9.882   | 10.509          | 10.642 | 10.784          | 11.23                   |         |
| ASNSD1    | Ne6B_t8SXed95UBqU4 | rs11679767 | 3.7                          | 3.54             | 0.07                 | 0.39                     | 10.74                         | 0.2475                            | 10.631 | 0.23               | 9.882   | 10.509          | 10.642 | 10.784          | 11.23                   |         |
| ASNSD1    | Ne6B_t8SXed95UBqU4 | rs7557519  | 3.54                         | 3.39             | -0.064               | 0.53                     | 47.63                         | 0.19                              | 10.631 | 0.23               | 9.882   | 10.509          | 10.642 | 10.784          | 11.23                   |         |
| ATCAY     | WqakT3UpX31yd7r4Xc | rs2240233  | 3.49                         | 3.34             | -0.072               | 1.51                     | -49.15                        | 0.3975                            | 7.121  | 0.013              | 7.098   | 7.111           | 7.118  | 7.13            | 7.17                    |         |
| ATCAY     | WqakT3UpX31yd7r4Xc | rs2240235  | 3.49                         | 3.34             | -0.072               | 1.62                     | -48.91                        | 0.3975                            | 7.121  | 0.013              | 7.098   | 7.111           | 7.118  | 7.13            | 7.17                    |         |
| ATE1      | xs0LpTEUo1FY4O6gh4 | rs11200176 | 3.37                         | 3.23             | 0.065                | 1.94                     | 75.71                         | 0.3425                            | 7.279  | 0.111              | 7.109   | 7.199           | 7.261  | 7.343           | 7.728                   |         |
| ATE1      | xs0LpTEUo1FY4O6gh4 | rs7476932  | 4.04                         | 3.87             | -0.08                | 1.37                     | 81.57                         | 0.2803                            | 7.279  | 0.111              | 7.109   | 7.199           | 7.261  | 7.343           | 7.728                   |         |
| ATE1      | xs0LpTEUo1FY4O6gh4 | rs10510103 | 5.19                         | 4.96             | -0.104               | 4.19                     | -63.04                        | 0.3693                            | 7.279  | 0.111              | 7.109   | 7.199           | 7.261  | 7.343           | 7.728                   |         |
| ATE1      | xs0LpTEUo1FY4O6gh4 | rs12240893 | 3.7                          | 3.55             | -0.071               | 1.93                     | -57.46                        | 0.1225                            | 7.279  | 0.111              | 7.109   | 7.199           | 7.261  | 7.343           | 7.728                   |         |
| ATE1      | xs0LpTEUo1FY4O6gh4 | rs11200215 | 4.97                         | 4.75             | -0.098               | 4.49                     | -43.72                        | 0.3668                            | 7.279  | 0.111              | 7.109   | 7.199           | 7.261  | 7.343           | 7.728                   |         |
| ATE1      | xs0LpTEUo1FY4O6gh4 | rs7923699  | 3.58                         | 3.43             | -0.069               | 0.66                     | 20.76                         | 0.2375                            | 7.279  | 0.111              | 7.109   | 7.199           | 7.261  | 7.343           | 7.728                   |         |
| ATE1      | xs0LpTEUo1FY4O6gh4 | rs10887032 | 3.61                         | 3.46             | 0.07                 | 1.8                      | 27.86                         | 0.13                              | 7.279  | 0.111              | 7.109   | 7.199           | 7.261  | 7.343           | 7.728                   |         |
| ATF6      | o799LpA7JXk11LvF64 | rs4657110  | 4.25                         | 4.07             | 0.08                 | 0.52                     | 62.16                         | 0.065                             | 9.815  | 0.242              | 9.176   | 9.632           | 9.812  | 9.978           | 10.354                  |         |
| ATF6      | o799LpA7JXk11LvF64 | rs12408365 | 4.25                         | 4.07             | -0.08                | 0.44                     | 94.37                         | 0.065                             | 9.815  | 0.242              | 9.176   | 9.632           | 9.812  | 9.978           | 10.354                  |         |
| ATF6      | o799LpA7JXk11LvF64 | rs6670606  | 4.42                         | 4.23             | -0.084               | 0.53                     | -91.09                        | 0.0653                            | 9.815  | 0.242              | 9.176   | 9.632           | 9.812  | 9.978           | 10.354                  |         |
| ATF6      | o799LpA7JXk11LvF64 | rs12026254 | 4.25                         | 4.07             | 0.08                 | 0.52                     | -78.32                        | 0.065                             | 9.815  | 0.242              | 9.176   | 9.632           | 9.812  | 9.978           | 10.354                  |         |
| ATF6      | o799LpA7JXk11LvF64 | rs12032568 | 4.25                         | 4.07             | 0.08                 | 0.52                     | -67.91                        | 0.065                             | 9.815  | 0.242              | 9.176   | 9.632           | 9.812  | 9.978           | 10.354                  |         |
| ATF6      | o799LpA7JXk11LvF64 | rs2341477  | 3.78                         | 3.62             | 0.07                 | 0.49                     | -49.67                        | 0.0553                            | 9.815  | 0.242              | 9.176   | 9.632           | 9.812  | 9.978           | 10.354                  |         |
| ATF6      | o799LpA7JXk11LvF64 | rs1136046  | 4.58                         | 4.38             | -0.086               | 1.19                     | -0.08                         | 0.1025                            | 9.815  | 0.242              | 9.176   | 9.632           | 9.812  | 9.978           | 10.354                  |         |
| ATG16L1   | rd6E.qjuLvlnriott  | rs6861     | 3.64                         | 3.48             | -0.067               | 1.05                     | -0.2                          | 0.305                             | 8.977  | 0.386              | 7.852   | 8.733           | 8.978  | 9.259           | 10.442                  |         |
| ATG16L1   | rd6E.qjuLvlnriott  | rs11894529 | 3.64                         | 3.48             | -0.067               | 1.05                     | 0.21                          | 0.305                             | 8.977  | 0.386              | 7.852   | 8.733           | 8.978  | 9.259           | 10.442                  |         |
| ATG16L1   | rd6E.qjuLvlnriott  | rs745498   | 3.88                         | 3.72             | -0.072               | 0.97                     | 33.94                         | 0.2975                            | 8.977  | 0.386              | 7.852   | 8.733           | 8.978  | 9.259           | 10.442                  |         |
| ATG16L1   | rd6E.qjuLvlnriott  | rs3792097  | 3.88                         | 3.72             | 0.072                | 0.97                     | 34.47                         | 0.2975                            | 8.977  | 0.386              | 7.852   | 8.733           | 8.978  | 9.259           | 10.442                  |         |
| ATG16L1   | rd6E.qjuLvlnriott  | rs1000141  | 3.46                         | 3.32             | 0.063                | 0.63                     | 38.03                         | 0.48                              | 8.977  | 0.386              | 7.852   | 8.733           | 8.978  | 9.259           | 10.442                  |         |
| ATG16L1   | rd6E.qjuLvlnriott  | rs2241873  | 3.9                          | 3.73             | -0.072               | 0.6                      | 43.61                         | 0.3525                            | 8.977  | 0.386              | 7.852   | 8.733           | 8.978  | 9.259           | 10.442                  |         |
| ATG16L1   | rd6E.qjuLvlnriott  | rs3792091  | 3.85                         | 3.69             | -0.072               | 0.73                     | 47.01                         | 0.5                               | 8.977  | 0.386              | 7.852   | 8.733           | 8.978  | 9.259           | 10.442                  |         |
| ATOH8     | E4oKLIp6vp6JbXHqQg | rs7577293  | 4.96                         | 4.75             | 0.102                | 1.82                     | -45.74                        | 0.231                             | 7.179  | 0.141              | 7.104   | 7.128           | 7.144  | 7.172           | 8.711                   |         |
| ATP1B1    | WeH7LCS796VcLPnl_4 | rs1358714  | 4.82                         | 4.61             | 0.091                | 2.31                     | 3.47                          | 0.495                             | 7.647  | 0.252              | 7.137   | 7.471           | 7.623  | 7.766           | 8.581                   |         |
| ATP1B1    | unu3iN6N5U0f6cuEqc | rs1358714  | 3.85                         | 3.69             | 0.073                | 2.25                     | 3.47                          | 0.495                             | 7.59   | 0.199              | 7.129   | 7.465           | 7.563  | 7.728           | 8.291                   |         |
| ATP1B1    | WeH7LCS796VcLPnl_4 | rs1200136  | 3.99                         | 3.82             | 0.073                | 0.6                      | 3.72                          | 0.41                              | 7.647  | 0.252              | 7.137   | 7.471           | 7.623  | 7.766           | 8.581                   |         |
| ATP1B1    | WeH7LCS796VcLPnl_4 | rs1200138  | 6.26                         | 5.98             | -0.124               | 0.52                     | 4.89                          | 0.26                              | 7.647  | 0.252              | 7.137   | 7.471           | 7.623  | 7.766           | 8.581                   |         |
| ATP1B1    | WeH7LCS796VcLPnl_4 | rs10919062 | 24.15                        | 23.01            | -0.448               | 3.5                      | 13                            | 0.14                              | 7.647  | 0.252              | 7.137   | 7.471           | 7.623  | 7.766           | 8.581                   |         |
| ATP1B1    | WeH7LCS796VcLPnl_4 | rs3753292  | 4.31                         | 4.13             | -0.082               | 0.03                     | -10.49                        | 0.4725                            | 7.647  | 0.252              | 7.137   | 7.471           | 7.623  | 7.766           | 8.581                   |         |
| ATP1B1    | WeH7LCS796VcLPnl_4 | rs1892094  | 6.07                         | 5.80             | 0.119                | 0.5                      | -7.5                          | 0.4925                            | 7.647  | 0.252              | 7.137   | 7.471           | 7.623  | 7.766           | 8.581                   |         |
| ATP1B1    | WeH7LCS796VcLPnl_4 | rs2000321  | 24.36                        | 23.21            | -0.453               | 3.37                     | -4.5                          | 0.135                             | 7.647  | 0.252              | 7.137   | 7.471           | 7.623  | 7.766           | 8.581                   |         |
| ATP1B1    | WeH7LCS796VcLPnl_4 | rs10919071 | 24.62                        | 23.46            | -0.458               | 3.56                     | -2.48                         | 0.1382                            | 7.647  | 0.252              | 7.137   | 7.471           | 7.623  | 7.766           | 8.581                   |         |
| ATP1B1    | WeH7LCS796VcLPnl_4 | rs1200160  | 5.44                         | 5.20             | 0.106                | 0.49                     | 1.24                          | 0.495                             | 7.647  | 0.252              | 7.137   | 7.471           | 7.623  | 7.766           | 8.581                   |         |
| ATP2B4    | rN9VRR971579N11zqQ | rs4951130  | 3.59                         | 3.44             | 0.067                | 1.06                     | -17.37                        | 0.185                             | 7.537  | 0.237              | 7.177   | 7.358           | 7.48   | 7.644           | 8.407                   |         |
| ATP2B4    | rN9VRR971579N11zqQ | rs955865   | 3.4                          | 3.25             | -0.067               | 1.5                      | -4.17                         | 0.4217                            | 7.537  | 0.237              | 7.177   | 7.358           | 7.48   | 7.644           | 8.407                   |         |
| ATP5G1    | iLe0X4lqYme6lCSq_Q | rs882150   | 5.37                         | 5.14             | 0.11                 | 2.17                     | -23.5                         | 0.46                              | 7.327  | 0.126              | 7.116   | 7.24            | 7.308  | 7.402           | 8.102                   |         |
| ATP5G1    | iLe0X4lqYme6lCSq_Q | rs962272   | 5                            | 4.78             | 0.101                | 1.52                     | 5.05                          | 0.475                             | 7.327  | 0.126              | 7.116   | 7.24            | 7.308  | 7.402           | 8.102                   |         |
| ATP5G1    | iLe0X4lqYme6lCSq_Q | rs962273   | 11.93                        | 11.38            | -0.245               | 5.35                     | 5.12                          | 0.3525                            | 7.327  | 0.126              | 7.116   | 7.24            | 7.308  | 7.402           | 8.102                   |         |
| ATP5G2    | WfXXnk.ykeBVDVhbO8 | rs11170624 | 3.59                         | 3.44             | 0.066                | 1.25                     | -28.71                        | 0.1875                            | 7.188  | 0.045              | 7.121   | 7.155           | 7.183  | 7.211           | 7.362                   |         |
| ATP5G2    | WfXXnk.ykeBVDVhbO8 | rs11170631 | 6.34                         | 6.06             | -0.127               | 2.88                     | -17.76                        | 0.3116                            | 7.188  | 0.045              | 7.121   | 7.155           | 7.183  | 7.211           | 7.362                   |         |
| ATP5G2    | WfXXnk.ykeBVDVhbO8 | rs10876477 | 4.17                         | 3.99             | 0.078                | 1.44                     | -5.7                          | 0.18                              | 7.188  | 0.045              | 7.121   | 7.155           | 7.183  | 7.211           | 7.362                   |         |
| ATP5G2    | WfXXnk.ykeBVDVhbO8 | rs1971762  | 7.11                         | 6.79             | 0.14                 | 3.09                     | -0.71                         | 0.3025                            | 7.188  | 0.045              | 7.121   | 7.155           | 7.183  | 7.211           | 7.362                   |         |
| ATP5G2    | WfXXnk.ykeBVDVhbO8 | rs12579591 | 3.97                         | 3.80             | -0.074               | 1.06                     | 26.16                         | 0.4825                            | 7.188  | 0.045              | 7.121   | 7.155           | 7.183  | 7.211           | 7.362                   |         |
| ATP5G2    | WfXXnk.ykeBVDVhbO8 | rs11170654 | 4.89                         | 4.68             | -0.097               | 1.1                      | 31.21                         | 0.1325                            | 7.188  | 0.045              | 7.121   | 7.155           | 7.183  | 7.211           | 7.362                   |         |
| ATP5G2    | WfXXnk.ykeBVDVhbO8 | rs10506316 | 7.44                         | 7.16             | -0.142               | 2.14                     | 31.43                         | 0.3175                            | 7.188  | 0.045              | 7.121   | 7.155           | 7.183  | 7.211           | 7.362                   |         |
| ATP5G2    | WfXXnk.ykeBVDVhbO8 | rs17708817 | 6.55                         | 6.20             | -0.124               | 1.85                     | 32.44                         | 0.3                               | 7.188  | 0.045              | 7.121   | 7.155           | 7.183  | 7.211           | 7.362                   |         |
| ATP6V0E2L | B3iXW2Vde_rCrvI7h8 | rs7795944  | 3.93                         | 3.76             | 0.075                | 1.88                     | 1.41                          | 0.0525                            | 11.764 | 0.398              | 10.265  | 11.547          | 11.822 | 11.994          | 12.933                  |         |
| ATP6V1B2  | 915I9eG4leJfjc5L3k | rs3779672  | 4.37                         | 4.18             | 0.081                | 1.63                     | -22.6                         | 0.175                             | 11.473 | 0.501              | 10.649  | 11.118          | 11.314 | 11.742          | 12.87                   |         |
| ATP6V1C1  | NiwJToJTgSwiIHl6To | rs1398270  | 4.27                         | 4.09             | -0.083               | 0.99                     | -18.28                        | 0.145                             | 8.554  | 0.276              | 7.127   | 8.384           | 8.553  | 8.71            | 9.863                   | Yes     |
| ATP6V1C1  | NiwJToJTgSwiIHl6To | rs1398271  | 4.27                         | 4.09             | -0.083               | 0.99                     | -18.13                        | 0.145                             | 8.554  | 0.276              | 7.127   | 8.384           | 8.553  | 8.71            | 9.863                   | Yes     |

| Symbol   | Lumi nuID          | SNP        | Population-based             | Population-based                      | % Variance Explained | Family-based                 | Distance from transcript (kb) | MAF    | Mean  | Transcript abundance (log2 scale) |         |                 |        |                 | SNP mapping under probe |         |
|----------|--------------------|------------|------------------------------|---------------------------------------|----------------------|------------------------------|-------------------------------|--------|-------|-----------------------------------|---------|-----------------|--------|-----------------|-------------------------|---------|
|          |                    |            | association p-value (-log10) | association p-value (-log10), GC adj. |                      | association p-value (-log10) |                               |        |       | Standard Deviation                | Minimum | 25th percentile | Median | 75th percentile |                         | Maximum |
| ATP6V1C1 | NiwJToJtGSwiHl6To  | rs2515200  | 3.7                          | 3.55                                  | -0.07                | 0.25                         | -15.14                        | 0.4575 | 8.554 | 0.276                             | 7.127   | 8.384           | 8.553  | 8.71            | 9.863                   | Yes     |
| ATP6V1C1 | NiwJToJtGSwiHl6To  | rs2453997  | 4.13                         | 3.95                                  | 0.08                 | 1.1                          | 0.16                          | 0.1475 | 8.554 | 0.276                             | 7.127   | 8.384           | 8.553  | 8.71            | 9.863                   | Yes     |
| ATP6V1C1 | NiwJToJtGSwiHl6To  | rs2453999  | 3.71                         | 3.55                                  | 0.071                | 0.59                         | 0.69                          | 0.0804 | 8.554 | 0.276                             | 7.127   | 8.384           | 8.553  | 8.71            | 9.863                   | Yes     |
| ATP6V1D  | 9mt0pQ8e6Jj.T1xUfk | rs12588458 | 4.03                         | 3.86                                  | 0.076                | 1.08                         | 4.26                          | 0.0825 | 9.829 | 0.259                             | 9.231   | 9.666           | 9.819  | 9.952           | 10.765                  |         |
| ATP6V1D  | 9mt0pQ8e6Jj.T1xUfk | rs3784085  | 3.81                         | 3.65                                  | 0.071                | 0.83                         | 31.56                         | 0.0628 | 9.829 | 0.259                             | 9.231   | 9.666           | 9.819  | 9.952           | 10.765                  |         |
| ATP6V1G2 | EXRtTR6d3D1H7097hU | rs3134899  | 5.4                          | 5.16                                  | 0.107                | 0.89                         | -38.95                        | 0.2487 | 8.01  | 0.252                             | 7.444   | 7.841           | 7.989  | 8.169           | 8.621                   |         |
| ATP6V1G2 | EXRtTR6d3D1H7097hU | rs3132468  | 5.25                         | 5.02                                  | 0.102                | 0.71                         | -36.75                        | 0.27   | 8.01  | 0.252                             | 7.444   | 7.841           | 7.989  | 8.169           | 8.621                   |         |
| ATP6V1G2 | EXRtTR6d3D1H7097hU | rs2246618  | 4.24                         | 4.05                                  | 0.081                | 0.84                         | -33.25                        | 0.2923 | 8.01  | 0.252                             | 7.444   | 7.841           | 7.989  | 8.169           | 8.621                   |         |
| ATP6V1G2 | EXRtTR6d3D1H7097hU | rs2516400  | 3.71                         | 3.55                                  | -0.069               | 0.47                         | -31.13                        | 0.2904 | 8.01  | 0.252                             | 7.444   | 7.841           | 7.989  | 8.169           | 8.621                   |         |
| ATP6V1G2 | EXRtTR6d3D1H7097hU | rs2516398  | 3.93                         | 3.76                                  | 0.073                | 0.71                         | -30.71                        | 0.3525 | 8.01  | 0.252                             | 7.444   | 7.841           | 7.989  | 8.169           | 8.621                   |         |
| ATP6V1G2 | EXRtTR6d3D1H7097hU | rs2844494  | 3.93                         | 3.76                                  | -0.073               | 0.66                         | -28.82                        | 0.355  | 8.01  | 0.252                             | 7.444   | 7.841           | 7.989  | 8.169           | 8.621                   |         |
| ATP6V1G2 | EXRtTR6d3D1H7097hU | rs3130637  | 8.3                          | 7.92                                  | 0.169                | 0.79                         | -24.09                        | 0.2775 | 8.01  | 0.252                             | 7.444   | 7.841           | 7.989  | 8.169           | 8.621                   |         |
| ATP6V1G2 | EXRtTR6d3D1H7097hU | rs3132454  | 4.59                         | 4.39                                  | 0.089                | 1.07                         | -22.59                        | 0.3825 | 8.01  | 0.252                             | 7.444   | 7.841           | 7.989  | 8.169           | 8.621                   |         |
| ATP6V1G2 | EXRtTR6d3D1H7097hU | rs3093993  | 8.3                          | 7.92                                  | -0.169               | 0.79                         | -21.51                        | 0.2775 | 8.01  | 0.252                             | 7.444   | 7.841           | 7.989  | 8.169           | 8.621                   |         |
| ATP6V1G2 | EXRtTR6d3D1H7097hU | rs3095227  | 7.84                         | 7.49                                  | 0.159                | 0.79                         | -21.24                        | 0.2739 | 8.01  | 0.252                             | 7.444   | 7.841           | 7.989  | 8.169           | 8.621                   |         |
| ATP6V1G2 | EXRtTR6d3D1H7097hU | rs3093983  | 9.3                          | 8.88                                  | -0.189               | 1.68                         | -15.31                        | 0.2261 | 8.01  | 0.252                             | 7.444   | 7.841           | 7.989  | 8.169           | 8.621                   |         |
| ATP6V1G2 | EXRtTR6d3D1H7097hU | rs3130055  | 9.04                         | 8.63                                  | 0.181                | 2.01                         | -14.84                        | 0.2875 | 8.01  | 0.252                             | 7.444   | 7.841           | 7.989  | 8.169           | 8.621                   |         |
| ATP6V1G2 | EXRtTR6d3D1H7097hU | rs3093978  | 9.47                         | 9.04                                  | -0.191               | 1.74                         | -13.74                        | 0.2275 | 8.01  | 0.252                             | 7.444   | 7.841           | 7.989  | 8.169           | 8.621                   |         |
| ATP6V1G2 | EXRtTR6d3D1H7097hU | rs2516393  | 9.47                         | 9.04                                  | 0.191                | 1.74                         | -5.5                          | 0.2275 | 8.01  | 0.252                             | 7.444   | 7.841           | 7.989  | 8.169           | 8.621                   |         |
| ATP6V1G2 | EXRtTR6d3D1H7097hU | rs6916921  | 3.41                         | 3.27                                  | 0.063                | 0.41                         | 5.8                           | 0.105  | 8.01  | 0.252                             | 7.444   | 7.841           | 7.989  | 8.169           | 8.621                   |         |
| ATP6V1G2 | EXRtTR6d3D1H7097hU | rs986475   | 3.89                         | 3.73                                  | 0.073                | 0.55                         | 42.08                         | 0.1025 | 8.01  | 0.252                             | 7.444   | 7.841           | 7.989  | 8.169           | 8.621                   |         |
| ATPIF1   | IRy_KLllo4UnldU6D4 | rs3767306  | 5                            | 4.78                                  | 0.096                | 1.64                         | -26.4                         | 0.245  | 7.938 | 0.288                             | 7.109   | 7.728           | 7.94   | 8.126           | 8.723                   |         |
| ATPIF1   | IRy_KLllo4UnldU6D4 | rs490633   | 5.37                         | 5.13                                  | 0.104                | 2.39                         | -24.41                        | 0.295  | 7.938 | 0.288                             | 7.109   | 7.728           | 7.94   | 8.126           | 8.723                   |         |
| ATPIF1   | IRy_KLllo4UnldU6D4 | rs567086   | 8.34                         | 7.96                                  | 0.16                 | 4.14                         | -7.18                         | 0.365  | 7.938 | 0.288                             | 7.109   | 7.728           | 7.94   | 8.126           | 8.723                   |         |
| ATPIF1   | IRy_KLllo4UnldU6D4 | rs8559     | 8.34                         | 7.96                                  | -0.16                | 4.44                         | -0.36                         | 0.365  | 7.938 | 0.288                             | 7.109   | 7.728           | 7.94   | 8.126           | 8.723                   |         |
| ATPIF1   | IRy_KLllo4UnldU6D4 | rs9508     | 5.37                         | 5.13                                  | -0.104               | 2.39                         | -0.33                         | 0.295  | 7.938 | 0.288                             | 7.109   | 7.728           | 7.94   | 8.126           | 8.723                   |         |
| ATPIF1   | IRy_KLllo4UnldU6D4 | rs507238   | 7.85                         | 7.50                                  | 0.151                | 3.7                          | 14.38                         | 0.3175 | 7.938 | 0.288                             | 7.109   | 7.728           | 7.94   | 8.126           | 8.723                   |         |
| ATPIF1   | IRy_KLllo4UnldU6D4 | rs508772   | 4.14                         | 3.96                                  | 0.078                | 3.19                         | 24.97                         | 0.485  | 7.938 | 0.288                             | 7.109   | 7.728           | 7.94   | 8.126           | 8.723                   |         |
| ATPIF1   | IRy_KLllo4UnldU6D4 | rs543240   | 6.48                         | 6.20                                  | -0.128               | 3.93                         | 31.47                         | 0.3712 | 7.938 | 0.288                             | 7.109   | 7.728           | 7.94   | 8.126           | 8.723                   |         |
| ATXN3    | Q6zPldeu7p5ET.NKgl | rs17127945 | 3.52                         | 3.37                                  | 0.065                | 1.09                         | -0.92                         | 0.165  | 7.363 | 0.157                             | 7.12    | 7.244           | 7.353  | 7.46            | 8.017                   |         |
| B3GALNT2 | ZNKkpAYw3i5C3ii1So | rs704716   | 3.76                         | 3.60                                  | -0.071               | 1.39                         | 24.18                         | 0.4975 | 7.254 | 0.09                              | 7.102   | 7.191           | 7.235  | 7.295           | 7.705                   |         |
| B3GALNT2 | ZNKkpAYw3i5C3ii1So | rs291388   | 3.76                         | 3.60                                  | -0.071               | 1.39                         | -19.76                        | 0.4975 | 7.254 | 0.09                              | 7.102   | 7.191           | 7.235  | 7.295           | 7.705                   |         |
| B3GALNT2 | ZNKkpAYw3i5C3ii1So | rs210037   | 3.58                         | 3.43                                  | 0.067                | 1.48                         | -18.28                        | 0.3625 | 7.254 | 0.09                              | 7.102   | 7.191           | 7.235  | 7.295           | 7.705                   |         |
| B3GALNT2 | ZNKkpAYw3i5C3ii1So | rs696247   | 3.47                         | 3.33                                  | 0.065                | 1.33                         | 0.38                          | 0.485  | 7.254 | 0.09                              | 7.102   | 7.191           | 7.235  | 7.295           | 7.705                   |         |
| B3GALNT2 | ZNKkpAYw3i5C3ii1So | rs291365   | 3.78                         | 3.62                                  | 0.07                 | 1.62                         | 20.26                         | 0.3775 | 7.254 | 0.09                              | 7.102   | 7.191           | 7.235  | 7.295           | 7.705                   |         |
| B3GALNT2 | ZNKkpAYw3i5C3ii1So | rs10802797 | 3.52                         | 3.37                                  | -0.066               | 1.72                         | 37.89                         | 0.355  | 7.254 | 0.09                              | 7.102   | 7.191           | 7.235  | 7.295           | 7.705                   |         |
| B3GALT1  | rt.kvUUIDgfrF5lunk | rs836678   | 3.88                         | 3.72                                  | 0.077                | 0.16                         | -18.83                        | 0.1558 | 7.115 | 0.018                             | 7.093   | 7.106           | 7.111  | 7.118           | 7.242                   |         |
| B3GALT3  | KecMsrQKokdfIV716s | rs1599389  | 3.74                         | 3.58                                  | 0.073                | 3.02                         | 12.89                         | 0.4318 | 7.17  | 0.042                             | 7.106   | 7.14            | 7.157  | 7.193           | 7.307                   | Yes     |
| B3GALT3  | KecMsrQKokdfIV716s | rs7619011  | 4.07                         | 3.90                                  | 0.079                | 3.67                         | 32.56                         | 0.4675 | 7.17  | 0.042                             | 7.106   | 7.14            | 7.157  | 7.193           | 7.307                   | Yes     |
| B3GALT4  | ii16k15rtiQyXp9lng | rs464921   | 5.24                         | 5.09                                  | 0.118                | 1.98                         | -4.41                         | 0.1175 | 8.801 | 0.326                             | 8.158   | 8.563           | 8.769  | 8.98            | 9.87                    |         |
| B3GALT4  | ii16k15rtiQyXp9lng | rs14398    | 5.64                         | 5.31                                  | 0.126                | 1.84                         | 8.06                          | 0.1125 | 8.801 | 0.326                             | 8.158   | 8.563           | 8.769  | 8.98            | 9.87                    |         |
| B3GALT4  | ii16k15rtiQyXp9lng | rs9277965  | 5.68                         | 5.43                                  | -0.128               | 1.53                         | 9.8                           | 0.1375 | 8.801 | 0.326                             | 8.158   | 8.563           | 8.769  | 8.98            | 9.87                    |         |
| B3GALT6  | Ev6D5_KBXm7n6lpSKK | rs9729550  | 3.65                         | 3.49                                  | -0.067               | 1.79                         | -32.4                         | 0.29   | 8.705 | 0.253                             | 7.988   | 8.541           | 8.676  | 8.874           | 9.704                   |         |
| B3GALT6  | Ev6D5_KBXm7n6lpSKK | rs11721    | 3.79                         | 3.63                                  | 0.071                | 0.9                          | -15.01                        | 0.0875 | 8.705 | 0.253                             | 7.988   | 8.541           | 8.676  | 8.874           | 9.704                   |         |
| B3GALT6  | Ev6D5_KBXm7n6lpSKK | rs3813199  | 5.57                         | 5.32                                  | 0.106                | 2.24                         | -9.37                         | 0.125  | 8.705 | 0.253                             | 7.988   | 8.541           | 8.676  | 8.874           | 9.704                   |         |
| B3GALT6  | Ev6D5_KBXm7n6lpSKK | rs3766186  | 5.57                         | 5.32                                  | 0.106                | 2.26                         | -5.21                         | 0.125  | 8.705 | 0.253                             | 7.988   | 8.541           | 8.676  | 8.874           | 9.704                   |         |
| B3GALT6  | Ev6D5_KBXm7n6lpSKK | rs7515488  | 6.33                         | 6.05                                  | -0.121               | 1.96                         | -3.84                         | 0.1818 | 8.705 | 0.253                             | 7.988   | 8.541           | 8.676  | 8.874           | 9.704                   |         |
| B3GTL    | iV6eXEUugCLdS953pc | rs7988806  | 3.32                         | 3.18                                  | -0.061               | 1.68                         | -40.94                        | 0.4697 | 7.833 | 0.208                             | 7.282   | 7.705           | 7.825  | 7.964           | 8.527                   |         |
| B3GTL    | iV6eXEUugCLdS953pc | rs9598993  | 6.54                         | 6.25                                  | -0.127               | 3.44                         | -1.78                         | 0.4849 | 7.833 | 0.208                             | 7.282   | 7.705           | 7.825  | 7.964           | 8.527                   |         |
| B3GTL    | iV6eXEUugCLdS953pc | rs9540737  | 4.89                         | 4.68                                  | 0.095                | 3.52                         | 6.86                          | 0.2275 | 7.833 | 0.208                             | 7.282   | 7.705           | 7.825  | 7.964           | 8.527                   |         |
| B3GTL    | iV6eXEUugCLdS953pc | rs7981424  | 3.87                         | 3.70                                  | 0.074                | 2.82                         | 26.12                         | 0.2925 | 7.833 | 0.208                             | 7.282   | 7.705           | 7.825  | 7.964           | 8.527                   |         |
| B3GTL    | iV6eXEUugCLdS953pc | rs912607   | 6.17                         | 5.90                                  | -0.119               | 3.82                         | 29.91                         | 0.4066 | 7.833 | 0.208                             | 7.282   | 7.705           | 7.825  | 7.964           | 8.527                   |         |
| B3GTL    | iV6eXEUugCLdS953pc | rs12428887 | 6.01                         | 5.74                                  | 0.118                | 5.38                         | 40.19                         | 0.205  | 7.833 | 0.208                             | 7.282   | 7.705           | 7.825  | 7.964           | 8.527                   |         |
| B3GTL    | iV6eXEUugCLdS953pc | rs9315120  | 5.83                         | 5.58                                  | -0.113               | 3.81                         | 49.46                         | 0.4495 | 7.833 | 0.208                             | 7.282   | 7.705           | 7.825  | 7.964           | 8.527                   |         |
| B3GTL    | iV6eXEUugCLdS953pc | rs9529902  | 5.85                         | 5.59                                  | 0.112                | 3.54                         | 58.06                         | 0.45   | 7.833 | 0.208                             | 7.282   | 7.705           | 7.825  | 7.964           | 8.527                   |         |
| B3GTL    | iV6eXEUugCLdS953pc | rs9529933  | 5.83                         | 5.57                                  | 0.113                | 3.56                         | 62.1                          | 0.4497 | 7.833 | 0.208                             | 7.282   | 7.705           | 7.825  | 7.964           | 8.527                   |         |
| B3GTL    | iV6eXEUugCLdS953pc | rs877104   | 9.25                         | 8.83                                  | 0.18                 | 4.36                         | -56.09                        | 0.24   | 7.833 | 0.208                             | 7.282   | 7.705           | 7.825  | 7.964           | 8.527                   |         |
| B3GTL    | iV6eXEUugCLdS953pc | rs9543390  | 9.15                         | 8.73                                  | 0.178                | 3.84                         | -53.27                        | 0.225  | 7.833 | 0.208                             | 7.282   | 7.705           | 7.825  | 7.964           | 8.527                   |         |
| B3GTL    | iV6eXEUugCLdS953pc | rs3761870  | 6.73                         | 6.43                                  | 0.134                | 3.3                          | -7.29                         | 0.34   | 7.833 | 0.208                             | 7.282   | 7.705           | 7.825  | 7.964           | 8.527                   |         |
| B3GTL    | iV6eXEUugCLdS953pc | rs1409379  | 16.79                        | 16.01                                 | 0.315                | 8                            | 2.08                          | 0.2625 | 7.833 | 0.208                             | 7.282   | 7.705           | 7.825  | 7.964           | 8.527                   |         |
| B3GTL    | iV6eXEUugCLdS953pc | rs1326316  | 13.95                        | 13.31                                 | -0.265               | 6.79                         | 15.35                         | 0.28   | 7.833 | 0.208                             | 7.282   | 7.705           | 7.825  | 7.964           | 8.527                   |         |
| B3GTL    | iV6eXEUugCLdS953pc | rs7333382  | 16.66                        | 15.88                                 | -0.313               | 7.75                         | 21.89                         | 0.2625 | 7.833 | 0.208                             | 7.282   | 7.705           | 7.825  | 7.964           | 8.527                   |         |



| Symbol  | Lumi nuID          | SNP        | Population-based             | Population-based                      | % Variance Explained | Family-based                 | Distance from transcript (kb) | MAF    | Mean   | Transcript abundance (log2 scale) |         |                 |        |                 | SNP mapping under probe |         |
|---------|--------------------|------------|------------------------------|---------------------------------------|----------------------|------------------------------|-------------------------------|--------|--------|-----------------------------------|---------|-----------------|--------|-----------------|-------------------------|---------|
|         |                    |            | association p-value (-log10) | association p-value (-log10), GC adj. |                      | association p-value (-log10) |                               |        |        | Standard Deviation                | Minimum | 25th percentile | Median | 75th percentile |                         | Maximum |
| B4GALT1 | i6X_oCNlikiukShLao | rs3818593  | 4.08                         | 3.91                                  | 0.077                | 0.37                         | 10.06                         | 0.2025 | 8.752  | 0.371                             | 7.215   | 8.513           | 8.769  | 8.985           | 9.719                   |         |
| B4GALT1 | i6X_oCNlikiukShLao | rs12342831 | 4.8                          | 4.60                                  | -0.095               | 1.08                         | 14.23                         | 0.2525 | 8.752  | 0.371                             | 7.215   | 8.513           | 8.769  | 8.985           | 9.719                   |         |
| B4GALT1 | i6X_oCNlikiukShLao | rs4879666  | 5.67                         | 5.42                                  | 0.111                | 2.63                         | 14.64                         | 0.47   | 8.752  | 0.371                             | 7.215   | 8.513           | 8.769  | 8.985           | 9.719                   |         |
| B4GALT1 | i6X_oCNlikiukShLao | rs10758192 | 7.35                         | 7.02                                  | -0.146               | 1.96                         | 21.01                         | 0.3125 | 8.752  | 0.371                             | 7.215   | 8.513           | 8.769  | 8.985           | 9.719                   |         |
| B4GALT1 | i6X_oCNlikiukShLao | rs1411609  | 5.32                         | 5.09                                  | 0.103                | 2.71                         | 26.66                         | 0.4125 | 8.752  | 0.371                             | 7.215   | 8.513           | 8.769  | 8.985           | 9.719                   |         |
| B4GALT1 | i6X_oCNlikiukShLao | rs2770807  | 5.67                         | 5.42                                  | -0.111               | 2.63                         | -25.48                        | 0.47   | 8.752  | 0.371                             | 7.215   | 8.513           | 8.769  | 8.985           | 9.719                   |         |
| B4GALT1 | i6X_oCNlikiukShLao | rs10758194 | 5.17                         | 4.94                                  | 0.099                | 2.51                         | -9.82                         | 0.42   | 8.752  | 0.371                             | 7.215   | 8.513           | 8.769  | 8.985           | 9.719                   |         |
| B4GALT1 | i6X_oCNlikiukShLao | rs10971438 | 5.76                         | 5.50                                  | 0.112                | 1.39                         | 13.07                         | 0.26   | 8.752  | 0.371                             | 7.215   | 8.513           | 8.769  | 8.985           | 9.719                   |         |
| B4GALT4 | ce4LrrtK4gptRAIqIA | rs9835060  | 3.84                         | 3.67                                  | 0.074                | 1.82                         | -22.36                        | 0.14   | 9.247  | 0.237                             | 8.654   | 9.103           | 9.238  | 9.387           | 9.922                   |         |
| B4GALT4 | ce4LrrtK4gptRAIqIA | rs6438503  | 3.95                         | 3.78                                  | -0.077               | 1.55                         | -0.2                          | 0.17   | 9.247  | 0.237                             | 8.654   | 9.103           | 9.238  | 9.387           | 9.922                   |         |
| B9D2    | oqhLA7Oq2SrvI4Sink | rs1046909  | 4.2                          | 4.02                                  | -0.077               | 0.44                         | 12.72                         | 0.4175 | 8.901  | 0.237                             | 8.25    | 8.76            | 8.912  | 9.041           | 9.758                   |         |
| BAK1    | WXTp3pEuw1KrsjqoHs | rs5745568  | 3.46                         | 3.31                                  | -0.066               | 0.05                         | 0.41                          | 0.21   | 8.658  | 0.265                             | 8.109   | 8.471           | 8.606  | 8.835           | 9.466                   |         |
| BBS12   | xdllTLoy3fUEt5104  | rs1026157  | 3.6                          | 3.45                                  | 0.067                | 0.59                         | -29.96                        | 0.2525 | 7.232  | 0.07                              | 7.108   | 7.188           | 7.22   | 7.269           | 7.489                   |         |
| BBS12   | xdllTLoy3fUEt5104  | rs370617   | 3.42                         | 3.28                                  | -0.063               | 2.9                          | -12.99                        | 0.3175 | 7.232  | 0.07                              | 7.108   | 7.188           | 7.22   | 7.269           | 7.489                   |         |
| BBS12   | xdllTLoy3fUEt5104  | rs309345   | 3.42                         | 3.28                                  | -0.063               | 2.9                          | -8.78                         | 0.3175 | 7.232  | 0.07                              | 7.108   | 7.188           | 7.22   | 7.269           | 7.489                   |         |
| BBS2    | xiStt5q_gBQIFK40ec | rs4784669  | 6.48                         | 6.20                                  | 0.126                | 4.57                         | -37.02                        | 0.3894 | 10.206 | 0.296                             | 9.323   | 10.024          | 10.251 | 10.407          | 11.091                  |         |
| BBS2    | xiStt5q_gBQIFK40ec | rs8060037  | 12.76                        | 12.17                                 | -0.246               | 6.09                         | -33.48                        | 0.2475 | 10.206 | 0.296                             | 9.323   | 10.024          | 10.251 | 10.407          | 11.091                  |         |
| BBS2    | xiStt5q_gBQIFK40ec | rs4784670  | 5.58                         | 5.34                                  | -0.108               | 3.97                         | -19.79                        | 0.3775 | 10.206 | 0.296                             | 9.323   | 10.024          | 10.251 | 10.407          | 11.091                  |         |
| BBS2    | xiStt5q_gBQIFK40ec | rs12918376 | 6.53                         | 6.24                                  | 0.127                | 4.38                         | 3.99                          | 0.355  | 10.206 | 0.296                             | 9.323   | 10.024          | 10.251 | 10.407          | 11.091                  |         |
| BBS2    | xiStt5q_gBQIFK40ec | rs435651   | 6.2                          | 5.92                                  | 0.12                 | 4.46                         | 19.1                          | 0.22   | 10.206 | 0.296                             | 9.323   | 10.024          | 10.251 | 10.407          | 11.091                  |         |
| BCAS4   | Qp.kqnU6193e46v.kY | rs6020823  | 3.94                         | 3.77                                  | 0.076                | 1.61                         | 4.41                          | 0.3788 | 9.232  | 0.383                             | 8.336   | 8.964           | 9.233  | 9.481           | 10.432                  |         |
| BCAS4   | Qp.kqnU6193e46v.kY | rs4811099  | 4.19                         | 4.01                                  | -0.081               | 1.94                         | 9.24                          | 0.3775 | 9.232  | 0.383                             | 8.336   | 8.964           | 9.233  | 9.481           | 10.432                  |         |
| BCAS4   | Qp.kqnU6193e46v.kY | rs2426210  | 3.86                         | 3.70                                  | -0.076               | 2.13                         | 43.77                         | 0.3692 | 9.232  | 0.383                             | 8.336   | 8.964           | 9.233  | 9.481           | 10.432                  |         |
| BCCIP   | NkoolYR_3qKQOT.44Y | rs10794023 | 4.67                         | 4.47                                  | 0.098                | 1.34                         | -18.7                         | 0.2175 | 10.017 | 0.359                             | 8.57    | 9.883           | 10.08  | 10.259          | 10.595                  |         |
| BCKDHB  | 0U7r1fW6FJbDAIUky4 | rs662408   | 3.84                         | 3.67                                  | 0.066                | 0.64                         | -59.62                        | 0.15   | 8.216  | 0.225                             | 7.498   | 8.066           | 8.209  | 8.363           | 8.873                   |         |
| BCKDHB  | 0U7r1fW6FJbDAIUky4 | rs700490   | 3.84                         | 3.67                                  | -0.066               | 0.67                         | -29.54                        | 0.15   | 8.216  | 0.225                             | 7.498   | 8.066           | 8.209  | 8.363           | 8.873                   |         |
| BCKDHB  | 0U7r1fW6FJbDAIUky4 | rs806847   | 3.83                         | 3.67                                  | 0.067                | 0.63                         | -21.26                        | 0.0975 | 8.216  | 0.225                             | 7.498   | 8.066           | 8.209  | 8.363           | 8.873                   |         |
| BCR     | i9eK7X6iFVC76iN5Qg | rs4820539  | 3.99                         | 3.82                                  | -0.075               | 2.01                         | -44.73                        | 0.4525 | 8.349  | 0.595                             | 7.277   | 7.851           | 8.315  | 8.771           | 10.047                  |         |
| BCR     | i9eK7X6iFVC76iN5Qg | rs4822363  | 4.84                         | 4.63                                  | 0.094                | 2.27                         | -31.7                         | 0.2475 | 8.349  | 0.595                             | 7.277   | 7.851           | 8.315  | 8.771           | 10.047                  |         |
| BCR     | i9eK7X6iFVC76iN5Qg | rs5751592  | 3.44                         | 3.30                                  | 0.065                | 1.36                         | -25.03                        | 0.285  | 8.349  | 0.595                             | 7.277   | 7.851           | 8.315  | 8.771           | 10.047                  |         |
| BCR     | i9eK7X6iFVC76iN5Qg | rs5759636  | 4.81                         | 4.60                                  | 0.094                | 2.46                         | 16                            | 0.245  | 8.349  | 0.595                             | 7.277   | 7.851           | 8.315  | 8.771           | 10.047                  |         |
| BCR     | i9eK7X6iFVC76iN5Qg | rs5751611  | 4.32                         | 4.13                                  | -0.082               | 1.84                         | 43.32                         | 0.4975 | 8.349  | 0.595                             | 7.277   | 7.851           | 8.315  | 8.771           | 10.047                  |         |
| BCR     | i9eK7X6iFVC76iN5Qg | rs762601   | 4.59                         | 4.39                                  | -0.087               | 1.68                         | 46.16                         | 0.4925 | 8.349  | 0.595                             | 7.277   | 7.851           | 8.315  | 8.771           | 10.047                  |         |
| BCR     | i9eK7X6iFVC76iN5Qg | rs2156921  | 5.18                         | 4.95                                  | 0.1                  | 2.07                         | 46.36                         | 0.4975 | 8.349  | 0.595                             | 7.277   | 7.851           | 8.315  | 8.771           | 10.047                  |         |
| BCR     | i9eK7X6iFVC76iN5Qg | rs4822375  | 4.31                         | 4.13                                  | -0.081               | 1.44                         | 52.94                         | 0.49   | 8.349  | 0.595                             | 7.277   | 7.851           | 8.315  | 8.771           | 10.047                  |         |
| BCR     | i9eK7X6iFVC76iN5Qg | rs1005184  | 4.65                         | 4.45                                  | -0.089               | 1.55                         | 58.29                         | 0.4925 | 8.349  | 0.595                             | 7.277   | 7.851           | 8.315  | 8.771           | 10.047                  |         |
| BCR     | i9eK7X6iFVC76iN5Qg | rs743584   | 3.88                         | 3.72                                  | 0.072                | 1.25                         | -45.65                        | 0.22   | 8.349  | 0.595                             | 7.277   | 7.851           | 8.315  | 8.771           | 10.047                  |         |
| BCR     | i9eK7X6iFVC76iN5Qg | rs140503   | 4.69                         | 4.48                                  | 0.09                 | 1.91                         | -43.52                        | 0.22   | 8.349  | 0.595                             | 7.277   | 7.851           | 8.315  | 8.771           | 10.047                  |         |
| BCR     | i9eK7X6iFVC76iN5Qg | rs7288846  | 3.92                         | 3.75                                  | 0.073                | 1.44                         | -34.86                        | 0.245  | 8.349  | 0.595                             | 7.277   | 7.851           | 8.315  | 8.771           | 10.047                  |         |
| BCR     | i9eK7X6iFVC76iN5Qg | rs131678   | 4.69                         | 4.49                                  | -0.094               | 1.09                         | -24.89                        | 0.3046 | 8.349  | 0.595                             | 7.277   | 7.851           | 8.315  | 8.771           | 10.047                  |         |
| BCR     | i9eK7X6iFVC76iN5Qg | rs2239666  | 5.27                         | 5.04                                  | 0.102                | 2.26                         | -20.94                        | 0.3    | 8.349  | 0.595                             | 7.277   | 7.851           | 8.315  | 8.771           | 10.047                  |         |
| BCR     | i9eK7X6iFVC76iN5Qg | rs12168342 | 3.37                         | 3.22                                  | -0.063               | 1.51                         | -13.72                        | 0.23   | 8.349  | 0.595                             | 7.277   | 7.851           | 8.315  | 8.771           | 10.047                  |         |
| BCR     | i9eK7X6iFVC76iN5Qg | rs131690   | 5.52                         | 5.28                                  | -0.106               | 2.06                         | -10.13                        | 0.4825 | 8.349  | 0.595                             | 7.277   | 7.851           | 8.315  | 8.771           | 10.047                  |         |
| BCR     | i9eK7X6iFVC76iN5Qg | rs131693   | 5.59                         | 5.35                                  | -0.108               | 2.1                          | -8.9                          | 0.4848 | 8.349  | 0.595                             | 7.277   | 7.851           | 8.315  | 8.771           | 10.047                  |         |
| BDNF    | iV1F152qp.DIEVFnnS | rs7116850  | 3.9                          | 3.73                                  | 0.072                | 0.79                         | -30.91                        | 0.3025 | 7.324  | 0.087                             | 7.169   | 7.262           | 7.308  | 7.366           | 7.767                   |         |
| BDNF    | iV1F152qp.DIEVFnnS | rs10835211 | 5.2                          | 4.98                                  | 0.097                | 2.22                         | -20.61                        | 0.24   | 7.324  | 0.087                             | 7.169   | 7.262           | 7.308  | 7.366           | 7.767                   |         |
| BDNF    | iV1F152qp.DIEVFnnS | rs12273363 | 3.96                         | 3.79                                  | 0.072                | 1.31                         | 22.88                         | 0.175  | 7.324  | 0.087                             | 7.169   | 7.262           | 7.308  | 7.366           | 7.767                   |         |
| BEGAIN  | BUuEKiV4L7iRgiongE | rs4074037  | 13.85                        | 13.21                                 | -0.267               | 4.08                         | 7.72                          | 0.38   | 7.27   | 0.132                             | 7.111   | 7.185           | 7.236  | 7.311           | 7.967                   |         |
| BEGAIN  | BUuEKiV4L7iRgiongE | rs10148448 | 4.9                          | 4.69                                  | 0.099                | 1.94                         | -9.98                         | 0.2411 | 7.27   | 0.132                             | 7.111   | 7.185           | 7.236  | 7.311           | 7.967                   |         |
| BFSP1   | 34m6hyiSCXIIAKV1Q  | rs6075218  | 5.12                         | 4.89                                  | -0.099               | 1.34                         | 10.82                         | 0.335  | 7.138  | 0.044                             | 7.092   | 7.111           | 7.12   | 7.146           | 7.344                   |         |
| BFSP1   | 34m6hyiSCXIIAKV1Q  | rs2023508  | 3.97                         | 3.80                                  | 0.076                | 1.16                         | 0.37                          | 7.138  | 0.044  | 7.092                             | 7.111   | 7.12            | 7.146  | 7.344           |                         |         |
| BFSP2   | ixRleehKiiJ46iB9c  | rs2276737  | 4.2                          | 4.02                                  | 0.086                | 3.48                         | -26.69                        | 0.3769 | 7.272  | 0.103                             | 7.109   | 7.197           | 7.251  | 7.321           | 7.777                   |         |
| BGLAP   | B.u1CSipJisuCIVKZw | rs4661037  | 3.3                          | 3.16                                  | -0.06                | 2.02                         | 25.37                         | 0.2425 | 7.657  | 0.193                             | 7.277   | 7.499           | 7.643  | 7.786           | 8.422                   |         |
| BICD2   | QlxAlLmTKBLqXqwtE  | rs7863890  | 14.7                         | 14.01                                 | -0.283               | 6.21                         | -47.9                         | 0.2175 | 11.239 | 0.385                             | 9.455   | 11.073          | 11.31  | 11.491          | 12.227                  | Yes     |
| BICD2   | QlxAlLmTKBLqXqwtE  | rs9969804  | 4.25                         | 4.07                                  | -0.083               | 2.61                         | -44.52                        | 0.4497 | 11.239 | 0.385                             | 9.455   | 11.073          | 11.31  | 11.491          | 12.227                  | Yes     |
| BICD2   | QlxAlLmTKBLqXqwtE  | rs912261   | 12.11                        | 11.55                                 | 0.234                | 4.29                         | -31.61                        | 0.1825 | 11.239 | 0.385                             | 9.455   | 11.073          | 11.31  | 11.491          | 12.227                  | Yes     |
| BICD2   | QlxAlLmTKBLqXqwtE  | rs10992420 | 9.42                         | 8.99                                  | -0.185               | 3.94                         | -22.84                        | 0.145  | 11.239 | 0.385                             | 9.455   | 11.073          | 11.31  | 11.491          | 12.227                  | Yes     |
| BICD2   | QlxAlLmTKBLqXqwtE  | rs12686771 | 8.75                         | 8.36                                  | -0.173               | 3.57                         | -1.06                         | 0.135  | 11.239 | 0.385                             | 9.455   | 11.073          | 11.31  | 11.491          | 12.227                  | Yes     |
| BICD2   | QlxAlLmTKBLqXqwtE  | rs12236788 | 12.02                        | 11.47                                 | 0.234                | 4.3                          | 15.57                         | 0.1834 | 11.239 | 0.385                             | 9.455   | 11.073          | 11.31  | 11.491          | 12.227                  | Yes     |
| BICD2   | QlxAlLmTKBLqXqwtE  | rs1810696  | 12.69                        | 12.10                                 | 0.246                | 5.23                         | 32.77                         | 0.1775 | 11.239 | 0.385                             | 9.455   | 11.073          | 11.31  | 11.491          | 12.227                  | Yes     |
| BICD2   | QlxAlLmTKBLqXqwtE  | rs10992474 | 9.79                         | 9.35                                  | 0.195                | 3.25                         | 38.9                          | 0.1364 | 11.239 | 0.385                             | 9.455   | 11.073          | 11.31  | 11.491          | 12.227                  | Yes     |
| BIK     | 9U4UeV6K6aXnnvN.8E | rs4988366  | 5.41                         | 5.17                                  | -0.111               | 1.55                         | -1.06                         | 0.125  | 7.389  | 0.131                             | 7.147   | 7.305           | 7.374  | 7.458           | 7.879                   |         |

| Symbol  | Lumi nuID          | SNP        | Population-based             | Population-based                      | % Variance Explained | Family-based                 | Distance from transcript (kb) | MAF    | Mean   | Transcript abundance (log2 scale) |         |                 |        |                 | SNP mapping under probe |
|---------|--------------------|------------|------------------------------|---------------------------------------|----------------------|------------------------------|-------------------------------|--------|--------|-----------------------------------|---------|-----------------|--------|-----------------|-------------------------|
|         |                    |            | association p-value (-log10) | association p-value (-log10), GC adj. |                      | association p-value (-log10) |                               |        |        | Standard Deviation                | Minimum | 25th percentile | Median | 75th percentile |                         |
| BIK     | 9U4UeV6K6aXnnvN.8E | rs742134   | 6.75                         | 6.44                                  | 0.141                | 1.48                         | -7.44                         | 0.14   | 7.389  | 0.131                             | 7.147   | 7.305           | 7.374  | 7.458           | 7.879                   |
| BIK     | 9U4UeV6K6aXnnvN.8E | rs6003071  | 4.86                         | 4.65                                  | -0.093               | 1.24                         | 9.08                          | 0.465  | 7.389  | 0.131                             | 7.147   | 7.305           | 7.374  | 7.458           | 7.879                   |
| BIN1    | Nu9eCee7Xcvi.emVeU | rs10194375 | 4.73                         | 4.53                                  | -0.09                | 2.49                         | -25.08                        | 0.305  | 11.769 | 0.36                              | 10.444  | 11.517          | 11.733 | 12.024          | 12.813                  |
| BIRC7   | I73oe73qXnijplnrQ  | rs6011691  | 5.21                         | 4.98                                  | 0.105                | 1.11                         | 0.18                          | 0.0675 | 7.119  | 0.016                             | 7.094   | 7.109           | 7.115  | 7.124           | 7.188                   |
| BIVM    | xiQtHSKEHFTPUh3ie8 | rs2031644  | 3.82                         | 3.66                                  | -0.074               | 3.37                         | -16.15                        | 0.165  | 7.847  | 0.206                             | 7.157   | 7.739           | 7.839  | 7.971           | 8.52                    |
| BIVM    | xiQtHSKEHFTPUh3ie8 | rs9557933  | 3.73                         | 3.57                                  | 0.073                | 2.93                         | 13.89                         | 0.08   | 7.847  | 0.206                             | 7.157   | 7.739           | 7.839  | 7.971           | 8.52                    |
| BLK     | ErVSh6wmHtNCwpVbno | rs12680762 | 5.06                         | 4.84                                  | -0.099               | 3.04                         | -19.49                        | 0.2225 | 7.713  | 0.381                             | 7.122   | 7.43            | 7.688  | 7.933           | 9.91                    |
| BLK     | ErVSh6wmHtNCwpVbno | rs2736340  | 8.19                         | 7.82                                  | -0.16                | 4.11                         | -7.55                         | 0.2225 | 7.713  | 0.381                             | 7.122   | 7.43            | 7.688  | 7.933           | 9.91                    |
| BLK     | ErVSh6wmHtNCwpVbno | rs13277113 | 6.85                         | 6.54                                  | 0.136                | 4.08                         | -2.34                         | 0.2161 | 7.713  | 0.381                             | 7.122   | 7.43            | 7.688  | 7.933           | 9.91                    |
| BLK     | ErVSh6wmHtNCwpVbno | rs12677843 | 3.91                         | 3.75                                  | -0.076               | 1.37                         | -34.92                        | 0.28   | 7.713  | 0.381                             | 7.122   | 7.43            | 7.688  | 7.933           | 9.91                    |
| BLK     | ErVSh6wmHtNCwpVbno | rs2248932  | 3.75                         | 3.59                                  | 0.072                | 1.04                         | -30.46                        | 0.335  | 7.713  | 0.381                             | 7.122   | 7.43            | 7.688  | 7.933           | 9.91                    |
| BLMH    | oJQOvwfXugeqPq6ko  | rs4251417  | 3.97                         | 3.80                                  | 0.078                | 0.97                         | -23.36                        | 0.1    | 10.233 | 0.221                             | 9.622   | 10.1            | 10.22  | 10.379          | 10.985                  |
| BLMH    | oJQOvwfXugeqPq6ko  | rs1487971  | 4.82                         | 4.61                                  | -0.096               | 1.97                         | -2.47                         | 0.3925 | 10.233 | 0.221                             | 9.622   | 10.1            | 10.22  | 10.379          | 10.985                  |
| BLMH    | oJQOvwfXugeqPq6ko  | rs7214248  | 3.44                         | 3.30                                  | 0.068                | 1.99                         | -1.05                         | 0.3342 | 10.233 | 0.221                             | 9.622   | 10.1            | 10.22  | 10.379          | 10.985                  |
| BLMH    | oJQOvwfXugeqPq6ko  | rs1050565  | 3.45                         | 3.30                                  | 0.068                | 1.98                         | 0.85                          | 0.335  | 10.233 | 0.221                             | 9.622   | 10.1            | 10.22  | 10.379          | 10.985                  |
| BLMH    | oJQOvwfXugeqPq6ko  | rs2129785  | 6.97                         | 6.66                                  | -0.142               | 2.98                         | 15.31                         | 0.1375 | 10.233 | 0.221                             | 9.622   | 10.1            | 10.22  | 10.379          | 10.985                  |
| BLMH    | oJQOvwfXugeqPq6ko  | rs7214014  | 6.05                         | 5.78                                  | 0.122                | 2.26                         | -7.68                         | 0.4625 | 10.233 | 0.221                             | 9.622   | 10.1            | 10.22  | 10.379          | 10.985                  |
| BLMH    | oJQOvwfXugeqPq6ko  | rs11867581 | 6.38                         | 6.09                                  | -0.13                | 2.28                         | 3.15                          | 0.4523 | 10.233 | 0.221                             | 9.622   | 10.1            | 10.22  | 10.379          | 10.985                  |
| BLMH    | oJQOvwfXugeqPq6ko  | rs8073378  | 6.42                         | 6.14                                  | 0.131                | 2.09                         | 10.69                         | 0.4525 | 10.233 | 0.221                             | 9.622   | 10.1            | 10.22  | 10.379          | 10.985                  |
| BLMH    | oJQOvwfXugeqPq6ko  | rs3110454  | 6.52                         | 6.23                                  | -0.135               | 3.03                         | 32.29                         | 0.425  | 10.233 | 0.221                             | 9.622   | 10.1            | 10.22  | 10.379          | 10.985                  |
| BLMH    | oJQOvwfXugeqPq6ko  | rs3110095  | 8                            | 7.64                                  | -0.165               | 3.61                         | 39.94                         | 0.4925 | 10.233 | 0.221                             | 9.622   | 10.1            | 10.22  | 10.379          | 10.985                  |
| BLOC1S2 | QTfB7V9QUV1EeeUiQ0 | rs7073610  | 3.9                          | 3.74                                  | -0.077               | 2.73                         | -27.09                        | 0.0525 | 7.196  | 0.059                             | 7.114   | 7.156           | 7.186  | 7.219           | 7.645                   |
| BLOC1S2 | QTfB7V9QUV1EeeUiQ0 | rs7072367  | 3.9                          | 3.74                                  | -0.077               | 2.73                         | -23.73                        | 0.0525 | 7.196  | 0.059                             | 7.114   | 7.156           | 7.186  | 7.219           | 7.645                   |
| BLOC1S2 | QTfB7V9QUV1EeeUiQ0 | rs12782963 | 3.9                          | 3.74                                  | 0.077                | 2.73                         | 2.09                          | 0.0525 | 7.196  | 0.059                             | 7.114   | 7.156           | 7.186  | 7.219           | 7.645                   |
| BLOC1S2 | QTfB7V9QUV1EeeUiQ0 | rs6584356  | 3.75                         | 3.59                                  | -0.075               | 2.82                         | 4.13                          | 0.0553 | 7.196  | 0.059                             | 7.114   | 7.156           | 7.186  | 7.219           | 7.645                   |
| BMP1    | HKg7SShVnNIXu3cRns | rs4715     | 6.58                         | 6.28                                  | -0.135               | 2.77                         | -1.88                         | 0.29   | 7.395  | 0.178                             | 7.147   | 7.269           | 7.363  | 7.452           | 8.41                    |
| BMPR1A  | NGgJNd1Avon3PIOBTK | rs4934282  | 3.29                         | 3.15                                  | 0.064                | 1.22                         | 47.53                         | 0.4725 | 7.592  | 0.159                             | 7.121   | 7.501           | 7.606  | 7.7             | 8.064                   |
| BNIP1   | oSepaCfNEAxDZaieGg | rs8543     | 5.54                         | 5.30                                  | 0.106                | 0.72                         | 0.28                          | 0.135  | 7.954  | 0.167                             | 7.137   | 7.861           | 7.963  | 8.052           | 8.38                    |
| BPHL    | 0t_uvX27qn42755e8E | rs10498658 | 3.39                         | 3.25                                  | 0.064                | 0.33                         | -14.35                        | 0.26   | 8.404  | 0.219                             | 7.9     | 8.251           | 8.4    | 8.533           | 9.032                   |
| BPIL2   | fsUu_l68.6hAh63nX4 | rs760657   | 3.52                         | 3.37                                  | 0.067                | 1.4                          | 3.91                          | 0.17   | 7.201  | 0.085                             | 7.114   | 7.15            | 7.174  | 7.217           | 7.627                   |
| BRCA1   | HNSH78ye_gocrfVvVU | rs8076790  | 3.45                         | 3.31                                  | -0.066               | 0.78                         | -41.71                        | 0.2075 | 7.212  | 0.079                             | 7.106   | 7.156           | 7.194  | 7.246           | 7.608                   |
| BRCA1   | HNSH78ye_gocrfVvVU | rs382571   | 5.29                         | 5.06                                  | 0.106                | 1.18                         | -24.83                        | 0.18   | 7.212  | 0.079                             | 7.106   | 7.156           | 7.194  | 7.246           | 7.608                   |
| BRCA1   | HNSH78ye_gocrfVvVU | rs9911630  | 10.26                        | 9.79                                  | 0.205                | 2.56                         | -7.97                         | 0.3325 | 7.212  | 0.079                             | 7.106   | 7.156           | 7.194  | 7.246           | 7.608                   |
| BRCA1   | HNSH78ye_gocrfVvVU | rs11657053 | 10.72                        | 10.23                                 | 0.212                | 2.46                         | -5.18                         | 0.32   | 7.212  | 0.079                             | 7.106   | 7.156           | 7.194  | 7.246           | 7.608                   |
| BRCA1   | HNSH78ye_gocrfVvVU | rs8176273  | 9.51                         | 9.07                                  | 0.186                | 2.13                         | 15.34                         | 0.315  | 7.212  | 0.079                             | 7.106   | 7.156           | 7.194  | 7.246           | 7.608                   |
| BRCA1   | HNSH78ye_gocrfVvVU | rs8176265  | 9.51                         | 9.07                                  | 0.186                | 2.13                         | 17.68                         | 0.315  | 7.212  | 0.079                             | 7.106   | 7.156           | 7.194  | 7.246           | 7.608                   |
| BRCA1   | HNSH78ye_gocrfVvVU | rs1799966  | 10.68                        | 10.19                                 | -0.213               | 2.46                         | 26.78                         | 0.3191 | 7.212  | 0.079                             | 7.106   | 7.156           | 7.194  | 7.246           | 7.608                   |
| BRCA1   | HNSH78ye_gocrfVvVU | rs1060915  | 9.51                         | 9.07                                  | 0.186                | 2.13                         | 38.16                         | 0.315  | 7.212  | 0.079                             | 7.106   | 7.156           | 7.194  | 7.246           | 7.608                   |
| BRCA1   | HNSH78ye_gocrfVvVU | rs16942    | 10.72                        | 10.23                                 | -0.212               | 2.46                         | -33.47                        | 0.32   | 7.212  | 0.079                             | 7.106   | 7.156           | 7.194  | 7.246           | 7.608                   |
| BRCA1   | HNSH78ye_gocrfVvVU | rs799917   | 10.51                        | 10.03                                 | -0.21                | 2.56                         | -32.53                        | 0.3375 | 7.212  | 0.079                             | 7.106   | 7.156           | 7.194  | 7.246           | 7.608                   |
| BRCA1   | HNSH78ye_gocrfVvVU | rs16940    | 9.51                         | 9.07                                  | 0.186                | 2.13                         | -32.23                        | 0.315  | 7.212  | 0.079                             | 7.106   | 7.156           | 7.194  | 7.246           | 7.608                   |
| BRD7    | 3Uqb_h1LHQhKdMmeAk | rs4785412  | 4.26                         | 4.08                                  | -0.079               | 1.9                          | -17.36                        | 0.1525 | 9.49   | 0.207                             | 8.104   | 9.396           | 9.51   | 9.61            | 9.986                   |
| BRDG1   | IFD0SoBylcae66wXkg | rs190255   | 4.76                         | 4.55                                  | 0.091                | 1.88                         | -47.74                        | 0.42   | 8.203  | 0.337                             | 7.501   | 7.958           | 8.199  | 8.427           | 9.253                   |
| BRDG1   | IFD0SoBylcae66wXkg | rs355499   | 4.25                         | 4.07                                  | -0.08                | 1.28                         | -34.6                         | 0.1    | 8.203  | 0.337                             | 7.501   | 7.958           | 8.199  | 8.427           | 9.253                   |
| BRDG1   | IFD0SoBylcae66wXkg | rs957582   | 4.07                         | 3.89                                  | 0.078                | 1.06                         | -12.3                         | 0.1352 | 8.203  | 0.337                             | 7.501   | 7.958           | 8.199  | 8.427           | 9.253                   |
| BRDG1   | IFD0SoBylcae66wXkg | rs3775867  | 5.03                         | 4.81                                  | -0.097               | 1.58                         | 19.81                         | 0.1    | 8.203  | 0.337                             | 7.501   | 7.958           | 8.199  | 8.427           | 9.253                   |
| BRWD1   | EAp_fionzB_Rcir8VE | rs418359   | 8.74                         | 8.34                                  | -0.179               | 4.36                         | -25.41                        | 0.455  | 7.823  | 0.432                             | 7.106   | 7.548           | 7.758  | 8.013           | 9.485                   |
| BRWD1   | EAp_fionzB_Rcir8VE | rs12482181 | 4.62                         | 4.42                                  | -0.095               | 1.74                         | -13.3                         | 0.3725 | 7.823  | 0.432                             | 7.106   | 7.548           | 7.758  | 8.013           | 9.485                   |
| BRWD1   | EAp_fionzB_Rcir8VE | rs6517522  | 5.09                         | 4.87                                  | 0.103                | 3.11                         | -8.3                          | 0.485  | 7.823  | 0.432                             | 7.106   | 7.548           | 7.758  | 8.013           | 9.485                   |
| BRWD1   | EAp_fionzB_Rcir8VE | rs2836935  | 3.36                         | 3.22                                  | -0.062               | 4.08                         | 4.22                          | 0.16   | 7.823  | 0.432                             | 7.106   | 7.548           | 7.758  | 8.013           | 9.485                   |
| BRWD1   | EAp_fionzB_Rcir8VE | rs2836939  | 4.55                         | 4.35                                  | 0.091                | 0.82                         | 16.4                          | 0.2475 | 7.823  | 0.432                             | 7.106   | 7.548           | 7.758  | 8.013           | 9.485                   |
| BRWD1   | EAp_fionzB_Rcir8VE | rs6517526  | 4.68                         | 4.48                                  | 0.097                | 1.83                         | 19.38                         | 0.3675 | 7.823  | 0.432                             | 7.106   | 7.548           | 7.758  | 8.013           | 9.485                   |
| BRWD1   | EAp_fionzB_Rcir8VE | rs2836961  | 9.78                         | 9.33                                  | 0.193                | 6.6                          | -58.54                        | 0.4025 | 7.823  | 0.432                             | 7.106   | 7.548           | 7.758  | 8.013           | 9.485                   |
| BRWD1   | EAp_fionzB_Rcir8VE | rs2836966  | 10                           | 9.54                                  | 0.202                | 7.07                         | -48.03                        | 0.4337 | 7.823  | 0.432                             | 7.106   | 7.548           | 7.758  | 8.013           | 9.485                   |
| BRWD1   | EAp_fionzB_Rcir8VE | rs6517538  | 4.83                         | 4.62                                  | -0.1                 | 1.94                         | -29.31                        | 0.365  | 7.823  | 0.432                             | 7.106   | 7.548           | 7.758  | 8.013           | 9.485                   |
| BRWD1   | EAp_fionzB_Rcir8VE | rs4624474  | 9.57                         | 9.14                                  | -0.193               | 4.69                         | 0.77                          | 0.4425 | 7.823  | 0.432                             | 7.106   | 7.548           | 7.758  | 8.013           | 9.485                   |
| BRWD1   | EAp_fionzB_Rcir8VE | rs2836981  | 9.65                         | 9.21                                  | -0.195               | 4.77                         | 2.81                          | 0.4425 | 7.823  | 0.432                             | 7.106   | 7.548           | 7.758  | 8.013           | 9.485                   |
| BRWD1   | EAp_fionzB_Rcir8VE | rs2836982  | 9.72                         | 9.28                                  | -0.196               | 5.68                         | 3.62                          | 0.4422 | 7.823  | 0.432                             | 7.106   | 7.548           | 7.758  | 8.013           | 9.485                   |
| BRWD1   | EAp_fionzB_Rcir8VE | rs2037925  | 9.65                         | 9.21                                  | 0.195                | 4.65                         | 14.38                         | 0.4425 | 7.823  | 0.432                             | 7.106   | 7.548           | 7.758  | 8.013           | 9.485                   |
| BRWD1   | EAp_fionzB_Rcir8VE | rs2836985  | 10.46                        | 9.98                                  | 0.206                | 7.18                         | 15.61                         | 0.4525 | 7.823  | 0.432                             | 7.106   | 7.548           | 7.758  | 8.013           | 9.485                   |
| BRWD1   | EAp_fionzB_Rcir8VE | rs2836987  | 9.4                          | 8.98                                  | 0.19                 | 4.68                         | 21.04                         | 0.445  | 7.823  | 0.432                             | 7.106   | 7.548           | 7.758  | 8.013           | 9.485                   |
| BRWD1   | EAp_fionzB_Rcir8VE | rs2026267  | 5.76                         | 5.50                                  | 0.118                | 2.53                         | 25.92                         | 0.34   | 7.823  | 0.432                             | 7.106   | 7.548           | 7.758  | 8.013           | 9.485                   |

| Symbol    | Lumi nuID          | SNP        | Population-based | Population-based          | % Variance | Family-based     | Distance from   | MAF    | Mean      | Transcript abundance (log2 scale) |            |            |            |         | SNP mapping under probe |         |
|-----------|--------------------|------------|------------------|---------------------------|------------|------------------|-----------------|--------|-----------|-----------------------------------|------------|------------|------------|---------|-------------------------|---------|
|           |                    |            | association      | association               |            | association      |                 |        |           | Transcript                        | Standard   | 25th       | Median     | 75th    |                         | Maximum |
|           |                    |            | p-value (-log10) | p-value (-log10), GC adj. | Explained  | p-value (-log10) | transcript (kb) |        | Deviation | Minimum                           | percentile | percentile | percentile | Maximum |                         |         |
| BRWD1     | EAp_fionzB_Rcir8VE | rs2070865  | 9.68             | 9.24                      | 0.192      | 6.68             | 29.96           | 0.46   | 8.23      | 0.432                             | 7.106      | 7.548      | 7.758      | 8.013   | 9.485                   |         |
| BTN2A2    | upJuletMTBIEISIDqM | rs9379858  | 4.31             | 4.13                      | -0.087     | 1.1              | -15.66          | 0.1225 | 7.22      | 0.069                             | 7.111      | 7.167      | 7.208      | 7.259   | 7.57                    |         |
| BTN2A2    | upJuletMTBIEISIDqM | rs9379859  | 4.31             | 4.13                      | 0.087      | 1.1              | -13.8           | 0.1225 | 7.22      | 0.069                             | 7.111      | 7.167      | 7.208      | 7.259   | 7.57                    |         |
| BTN2A2    | upJuletMTBIEISIDqM | rs12176317 | 4.31             | 4.13                      | 0.087      | 1.1              | -10.57          | 0.1225 | 7.22      | 0.069                             | 7.111      | 7.167      | 7.208      | 7.259   | 7.57                    |         |
| BTN2A2    | upJuletMTBIEISIDqM | rs1979     | 4.48             | 4.29                      | 0.091      | 1.05             | -5.76           | 0.1206 | 7.22      | 0.069                             | 7.111      | 7.167      | 7.208      | 7.259   | 7.57                    |         |
| BTN3A1    | 6w1bzod7dSiKrc1FXk | rs12199613 | 3.51             | 3.36                      | 0.068      | 1.79             | -35.27          | 0.3995 | 10.826    | 0.549                             | 9.624      | 10.421     | 10.843     | 11.203  | 12.353                  |         |
| BTN3A1    | 6w1bzod7dSiKrc1FXk | rs4320356  | 3.79             | 3.63                      | 0.073      | 2.62             | 8.12            | 0.435  | 10.826    | 0.549                             | 9.624      | 10.421     | 10.843     | 11.203  | 12.353                  |         |
| BTN3A1    | 6w1bzod7dSiKrc1FXk | rs2237236  | 3.71             | 3.55                      | 0.071      | 2.62             | 36.12           | 0.4375 | 10.826    | 0.549                             | 9.624      | 10.421     | 10.843     | 11.203  | 12.353                  |         |
| BTN3A2    | KS9USpO4f4ClciEdl  | rs6933583  | 13.73            | 13.09                     | -0.259     | 3.19             | -10.12          | 0.2875 | 11.146    | 0.609                             | 8.504      | 10.84      | 11.252     | 11.535  | 12.677                  | Yes     |
| BTN3A2    | KS9USpO4f4ClciEdl  | rs4712981  | 13.73            | 13.09                     | -0.259     | 3.33             | -3.97           | 0.2875 | 11.146    | 0.609                             | 8.504      | 10.84      | 11.252     | 11.535  | 12.677                  | Yes     |
| BTN3A2    | KS9USpO4f4ClciEdl  | rs12199613 | 6.42             | 6.13                      | -0.129     | 1.48             | 1.82            | 0.3995 | 11.146    | 0.609                             | 8.504      | 10.84      | 11.252     | 11.535  | 12.677                  | Yes     |
| BTN3A2    | KS9USpO4f4ClciEdl  | rs9379858  | 25.25            | 24.06                     | 0.444      | 5.17             | 2.29            | 0.1225 | 11.146    | 0.609                             | 8.504      | 10.84      | 11.252     | 11.535  | 12.677                  | Yes     |
| BTN3A2    | KS9USpO4f4ClciEdl  | rs9379859  | 25.25            | 24.06                     | -0.444     | 5.17             | 4.15            | 0.1225 | 11.146    | 0.609                             | 8.504      | 10.84      | 11.252     | 11.535  | 12.677                  | Yes     |
| BTN3A2    | KS9USpO4f4ClciEdl  | rs12176317 | 25.25            | 24.06                     | -0.444     | 5.17             | -5.76           | 0.1225 | 11.146    | 0.609                             | 8.504      | 10.84      | 11.252     | 11.535  | 12.677                  | Yes     |
| BTN3A2    | KS9USpO4f4ClciEdl  | rs9379870  | 13.73            | 13.09                     | -0.259     | 3.27             | -4.14           | 0.2875 | 11.146    | 0.609                             | 8.504      | 10.84      | 11.252     | 11.535  | 12.677                  | Yes     |
| BTN3A2    | KS9USpO4f4ClciEdl  | rs13218591 | 14.75            | 14.07                     | 0.277      | 3.36             | -1.72           | 0.3015 | 11.146    | 0.609                             | 8.504      | 10.84      | 11.252     | 11.535  | 12.677                  | Yes     |
| BTN3A2    | KS9USpO4f4ClciEdl  | rs1979     | 25.1             | 23.91                     | -0.443     | 5.07             | -0.96           | 0.1206 | 11.146    | 0.609                             | 8.504      | 10.84      | 11.252     | 11.535  | 12.677                  | Yes     |
| BTN3A2    | KS9USpO4f4ClciEdl  | rs4712984  | 5.95             | 5.69                      | -0.118     | 1.82             | 0.99            | 0.4188 | 11.146    | 0.609                             | 8.504      | 10.84      | 11.252     | 11.535  | 12.677                  | Yes     |
| BTN3A2    | KS9USpO4f4ClciEdl  | rs1796518  | 12.46            | 11.89                     | -0.236     | 4.29             | 10.12           | 0.345  | 11.146    | 0.609                             | 8.504      | 10.84      | 11.252     | 11.535  | 12.677                  | Yes     |
| BTN3A2    | KS9USpO4f4ClciEdl  | rs7756881  | 3.39             | 3.25                      | 0.064      | 2.99             | 11.38           | 0.1825 | 11.146    | 0.609                             | 8.504      | 10.84      | 11.252     | 11.535  | 12.677                  | Yes     |
| BTN3A2    | KS9USpO4f4ClciEdl  | rs1796520  | 3.92             | 3.75                      | -0.072     | 0.79             | 32.25           | 0.4625 | 11.146    | 0.609                             | 8.504      | 10.84      | 11.252     | 11.535  | 12.677                  | Yes     |
| BTN3A2    | KS9USpO4f4ClciEdl  | rs4320356  | 5.28             | 5.05                      | -0.104     | 1.3              | 45.01           | 0.435  | 11.146    | 0.609                             | 8.504      | 10.84      | 11.252     | 11.535  | 12.677                  | Yes     |
| BXDC1     | Z6hXT6N694ooRF6TaM | rs11751660 | 10.97            | 10.47                     | 0.212      | 3.05             | -3.4            | 0.2375 | 10.269    | 0.233                             | 9.727      | 10.098     | 10.272     | 10.434  | 10.934                  |         |
| BXDC1     | Z6hXT6N694ooRF6TaM | rs7748974  | 5.25             | 5.02                      | 0.103      | 0.82             | 9.1             | 0.4112 | 10.269    | 0.233                             | 9.727      | 10.098     | 10.272     | 10.434  | 10.934                  |         |
| BXDC1     | Z6hXT6N694ooRF6TaM | rs13202203 | 8.75             | 8.35                      | 0.174      | 2.69             | 19.67           | 0.225  | 10.269    | 0.233                             | 9.727      | 10.098     | 10.272     | 10.434  | 10.934                  |         |
| BYSL      | NeCFSNKkuEJRkHn7p0 | rs6913232  | 4.45             | 4.26                      | -0.087     | 1.19             | 14.36           | 0.415  | 8.075     | 0.237                             | 7.557      | 7.909      | 8.076      | 8.217   | 8.87                    |         |
| BYSL      | NeCFSNKkuEJRkHn7p0 | rs4623235  | 3.55             | 3.40                      | -0.068     | 1.27             | 24.07           | 0.4475 | 8.075     | 0.237                             | 7.557      | 7.909      | 8.076      | 8.217   | 8.87                    |         |
| C10orf116 | upJRRdrrvXtWd0b1Q  | rs4934282  | 3.46             | 3.32                      | 0.064      | 1.26             | 1.81            | 0.4725 | 7.164     | 0.054                             | 7.105      | 7.126      | 7.15       | 7.182   | 7.449                   |         |
| C10orf116 | upJRRdrrvXtWd0b1Q  | rs1240375  | 4.39             | 4.20                      | -0.084     | 0.82             | 2.53            | 0.405  | 7.164     | 0.054                             | 7.105      | 7.126      | 7.15       | 7.182   | 7.449                   |         |
| C10orf116 | upJRRdrrvXtWd0b1Q  | rs1240402  | 4.65             | 4.44                      | -0.09      | 1.91             | 11.18           | 0.3475 | 7.164     | 0.054                             | 7.105      | 7.126      | 7.15       | 7.182   | 7.449                   |         |
| C10orf119 | oBsw17OIKAeLlde7BU | rs2273747  | 9.84             | 9.39                      | 0.195      | 4.52             | 2.54            | 0.1675 | 7.919     | 0.2                               | 7.313      | 7.776      | 7.925      | 8.046   | 8.709                   |         |
| C10orf119 | oBsw17OIKAeLlde7BU | rs17681175 | 11.51            | 10.98                     | 0.229      | 4.92             | 14.6            | 0.1168 | 7.919     | 0.2                               | 7.313      | 7.776      | 7.925      | 8.046   | 8.709                   |         |
| C10orf119 | oBsw17OIKAeLlde7BU | rs2475321  | 4.2              | 4.02                      | 0.082      | 1.99             | 14.71           | 0.4725 | 7.919     | 0.2                               | 7.313      | 7.776      | 7.925      | 8.046   | 8.709                   |         |
| C10orf119 | oBsw17OIKAeLlde7BU | rs2456709  | 4.01             | 3.84                      | 0.079      | 1.99             | -16             | 0.4749 | 7.919     | 0.2                               | 7.313      | 7.776      | 7.925      | 8.046   | 8.709                   |         |
| C10orf47  | 3kuEX_7_zt1JlIsEiU | rs7893993  | 3.82             | 3.66                      | -0.072     | 3.15             | 8.79            | 0.29   | 7.258     | 0.106                             | 7.107      | 7.18       | 7.243      | 7.311   | 7.735                   |         |
| C11orf10  | ELpdHFTqf6LXFxneo  | rs968567   | 4.91             | 4.70                      | 0.095      | 2.27             | 35.48           | 0.1975 | 12.849    | 0.291                             | 12.112     | 12.665     | 12.891     | 13.028  | 14.15                   |         |
| C11orf10  | ELpdHFTqf6LXFxneo  | rs174579   | 3.61             | 3.45                      | 0.069      | 2.02             | 45.53           | 0.2475 | 12.849    | 0.291                             | 12.112     | 12.665     | 12.891     | 13.028  | 14.15                   |         |
| C11orf17  | fl..B_KuyK11Gfv5eA | rs2568061  | 11.88            | 11.33                     | -0.233     | 4.37             | -46.44          | 0.43   | 9.552     | 0.247                             | 8.975      | 9.392      | 9.533      | 9.684   | 10.439                  |         |
| C11orf17  | 0Lnh6tJfWohot7d.S4 | rs2568061  | 8.53             | 8.15                      | -0.165     | 1.52             | -46.44          | 0.43   | 8.421     | 0.264                             | 7.219      | 8.269      | 8.426      | 8.567   | 9.342                   |         |
| C11orf17  | fl..B_KuyK11Gfv5eA | rs16906256 | 4.35             | 4.16                      | -0.084     | 0.71             | -45.6           | 0.28   | 9.552     | 0.247                             | 8.975      | 9.392      | 9.533      | 9.684   | 10.439                  |         |
| C11orf17  | 0Lnh6tJfWohot7d.S4 | rs16906256 | 3.83             | 3.67                      | -0.071     | 0.71             | -45.6           | 0.28   | 8.421     | 0.264                             | 7.219      | 8.269      | 8.426      | 8.567   | 9.342                   |         |
| C11orf17  | fl..B_KuyK11Gfv5eA | rs2653565  | 8.53             | 8.14                      | -0.168     | 5.47             | -39.51          | 0.3518 | 9.552     | 0.247                             | 8.975      | 9.392      | 9.533      | 9.684   | 10.439                  |         |
| C11orf17  | 0Lnh6tJfWohot7d.S4 | rs2653565  | 4.53             | 4.34                      | -0.085     | 0.58             | -39.51          | 0.3518 | 8.421     | 0.264                             | 7.219      | 8.269      | 8.426      | 8.567   | 9.342                   |         |
| C11orf17  | fl..B_KuyK11Gfv5eA | rs1025438  | 3.94             | 3.77                      | -0.074     | 1.62             | -27.24          | 0.108  | 9.552     | 0.247                             | 8.975      | 9.392      | 9.533      | 9.684   | 10.439                  |         |
| C11orf17  | fl..B_KuyK11Gfv5eA | rs10840148 | 11.29            | 10.77                     | 0.22       | 4.52             | -9.17           | 0.425  | 9.552     | 0.247                             | 8.975      | 9.392      | 9.533      | 9.684   | 10.439                  |         |
| C11orf17  | 0Lnh6tJfWohot7d.S4 | rs10840148 | 7.56             | 7.22                      | 0.146      | 1.5              | -9.17           | 0.425  | 8.421     | 0.264                             | 7.219      | 8.269      | 8.426      | 8.567   | 9.342                   |         |
| C11orf17  | fl..B_KuyK11Gfv5eA | rs2568029  | 3.56             | 3.41                      | 0.066      | 3.24             | -5.18           | 0.245  | 9.552     | 0.247                             | 8.975      | 9.392      | 9.533      | 9.684   | 10.439                  |         |
| C11orf17  | fl..B_KuyK11Gfv5eA | rs1560569  | 11.84            | 11.29                     | 0.23       | 4.62             | -1.74           | 0.42   | 9.552     | 0.247                             | 8.975      | 9.392      | 9.533      | 9.684   | 10.439                  |         |
| C11orf17  | 0Lnh6tJfWohot7d.S4 | rs1560569  | 7.63             | 7.29                      | 0.146      | 1.64             | -1.74           | 0.42   | 8.421     | 0.264                             | 7.219      | 8.269      | 8.426      | 8.567   | 9.342                   |         |
| C11orf17  | fl..B_KuyK11Gfv5eA | rs2653601  | 8.53             | 8.15                      | -0.167     | 5.49             | 1.32            | 0.35   | 9.552     | 0.247                             | 8.975      | 9.392      | 9.533      | 9.684   | 10.439                  |         |
| C11orf17  | 0Lnh6tJfWohot7d.S4 | rs2653601  | 4.29             | 4.11                      | -0.08      | 0.59             | 1.32            | 0.35   | 8.421     | 0.264                             | 7.219      | 8.269      | 8.426      | 8.567   | 9.342                   |         |
| C11orf17  | fl..B_KuyK11Gfv5eA | rs3763912  | 7.7              | 7.35                      | -0.153     | 6.09             | 22.69           | 0.4    | 9.552     | 0.247                             | 8.975      | 9.392      | 9.533      | 9.684   | 10.439                  |         |
| C11orf17  | 0Lnh6tJfWohot7d.S4 | rs3763912  | 3.96             | 3.79                      | -0.074     | 0.57             | 22.69           | 0.4    | 8.421     | 0.264                             | 7.219      | 8.269      | 8.426      | 8.567   | 9.342                   |         |
| C11orf17  | fl..B_KuyK11Gfv5eA | rs4929922  | 8.06             | 7.69                      | -0.159     | 2.85             | 34.15           | 0.385  | 9.552     | 0.247                             | 8.975      | 9.392      | 9.533      | 9.684   | 10.439                  |         |
| C11orf17  | 0Lnh6tJfWohot7d.S4 | rs4929922  | 5.54             | 5.29                      | -0.106     | 1.07             | 34.15           | 0.385  | 8.421     | 0.264                             | 7.219      | 8.269      | 8.426      | 8.567   | 9.342                   |         |
| C11orf17  | fl..B_KuyK11Gfv5eA | rs2163625  | 7.7              | 7.35                      | -0.154     | 5.67             | 39.91           | 0.407  | 9.552     | 0.247                             | 8.975      | 9.392      | 9.533      | 9.684   | 10.439                  |         |
| C11orf17  | 0Lnh6tJfWohot7d.S4 | rs2163625  | 3.58             | 3.43                      | -0.067     | 0.54             | 39.91           | 0.407  | 8.421     | 0.264                             | 7.219      | 8.269      | 8.426      | 8.567   | 9.342                   |         |
| C11orf17  | fl..B_KuyK11Gfv5eA | rs2653570  | 9.87             | 9.42                      | -0.193     | 3.63             | 46.2            | 0.4824 | 9.552     | 0.247                             | 8.975      | 9.392      | 9.533      | 9.684   | 10.439                  |         |
| C11orf17  | 0Lnh6tJfWohot7d.S4 | rs2653570  | 6.49             | 6.20                      | -0.124     | 1.16             | 46.2            | 0.4824 | 8.421     | 0.264                             | 7.219      | 8.269      | 8.426      | 8.567   | 9.342                   |         |
| C11orf57  | 3l8p9jr31BVfDOnyro | rs2303436  | 4.12             | 3.95                      | 0.078      | 0.41             | -48.69          | 0.3825 | 8.778     | 0.157                             | 8.318      | 8.679      | 8.783      | 8.865   | 9.647                   |         |
| C11orf57  | 3l8p9jr31BVfDOnyro | rs478941   | 3.93             | 3.76                      | -0.074     | 0.2              | -41.02          | 0.4    | 8.778     | 0.157                             | 8.318      | 8.679      | 8.783      | 8.865   | 9.647                   |         |
| C11orf57  | 3l8p9jr31BVfDOnyro | rs627441   | 3.93             | 3.76                      | -0.074     | 0.2              | -36.85          | 0.4    | 8.778     | 0.157                             | 8.318      | 8.679      | 8.783      | 8.865   | 9.647                   |         |

| Symbol    | Lumi nuID          | SNP        | Population-based             | Population-based                      | % Variance Explained | Family-based                 | Distance from transcript (kb) | MAF    | Mean   | Transcript abundance (log2 scale) |         |                 |        |                 | SNP mapping under probe |         |
|-----------|--------------------|------------|------------------------------|---------------------------------------|----------------------|------------------------------|-------------------------------|--------|--------|-----------------------------------|---------|-----------------|--------|-----------------|-------------------------|---------|
|           |                    |            | association p-value (-log10) | association p-value (-log10), GC adj. |                      | association p-value (-log10) |                               |        |        | Standard Deviation                | Minimum | 25th percentile | Median | 75th percentile |                         | Maximum |
| C11orf57  | 3l8p9jr31BVfDOnyro | rs10891314 | 4.75                         | 4.55                                  | -0.091               | 0.5                          | -28.36                        | 0.3939 | 8.778  | 0.157                             | 8.318   | 8.679           | 8.783  | 8.865           | 9.647                   |         |
| C11orf57  | 3l8p9jr31BVfDOnyro | rs10789859 | 3.86                         | 3.69                                  | -0.072               | 0.34                         | 4.66                          | 0.3844 | 8.778  | 0.157                             | 8.318   | 8.679           | 8.783  | 8.865           | 9.647                   |         |
| C11orf63  | uXaSCn_gxnCFNVAU   | rs7114583  | 10.13                        | 9.67                                  | 0.198                | 5.15                         | -4.26                         | 0.1    | 7.6    | 0.158                             | 7.178   | 7.499           | 7.584  | 7.687           | 8.147                   |         |
| C12orf26  | Nk63nfuC_jVuA3V14  | rs10778889 | 5.22                         | 4.99                                  | -0.11                | 2                            | -13.07                        | 0.0975 | 9.044  | 0.226                             | 8.232   | 8.885           | 9.058  | 9.212           | 9.768                   |         |
| C12orf26  | Nk63nfuC_jVuA3V14  | rs4495950  | 3.64                         | 3.49                                  | -0.074               | 2.45                         | -8.14                         | 0.1275 | 9.044  | 0.226                             | 8.232   | 8.885           | 9.058  | 9.212           | 9.768                   |         |
| C12orf26  | Nk63nfuC_jVuA3V14  | rs2401035  | 3.64                         | 3.49                                  | 0.074                | 2.5                          | -1.16                         | 0.1275 | 9.044  | 0.226                             | 8.232   | 8.885           | 9.058  | 9.212           | 9.768                   |         |
| C12orf26  | Nk63nfuC_jVuA3V14  | rs17774459 | 3.83                         | 3.67                                  | 0.079                | 0.99                         | 7.75                          | 0.0525 | 9.044  | 0.226                             | 8.232   | 8.885           | 9.058  | 9.212           | 9.768                   |         |
| C12orf26  | Nk63nfuC_jVuA3V14  | rs7977442  | 3.59                         | 3.44                                  | -0.072               | 2.53                         | 38.75                         | 0.1307 | 9.044  | 0.226                             | 8.232   | 8.885           | 9.058  | 9.212           | 9.768                   |         |
| C12orf26  | Nk63nfuC_jVuA3V14  | rs4143188  | 3.56                         | 3.41                                  | -0.071               | 2.46                         | 50.46                         | 0.1325 | 9.044  | 0.226                             | 8.232   | 8.885           | 9.058  | 9.212           | 9.768                   |         |
| C12orf26  | Nk63nfuC_jVuA3V14  | rs1494023  | 3.6                          | 3.45                                  | -0.072               | 2.33                         | -9.03                         | 0.1332 | 9.044  | 0.226                             | 8.232   | 8.885           | 9.058  | 9.212           | 9.768                   |         |
| C12orf43  | Zrt3iWFI86AdD7SKFQ | rs2254779  | 9.65                         | 9.21                                  | -0.2                 | 5.6                          | -31.61                        | 0.1025 | 8.416  | 0.227                             | 7.137   | 8.279           | 8.418  | 8.558           | 9.218                   |         |
| C12orf43  | Zrt3iWFI86AdD7SKFQ | rs10774580 | 3.69                         | 3.53                                  | -0.072               | 0.69                         | 22.12                         | 0.435  | 8.416  | 0.227                             | 7.137   | 8.279           | 8.418  | 8.558           | 9.218                   |         |
| C12orf60  | EILTTd7nASSwTX6i3o | rs247326   | 3.77                         | 3.61                                  | -0.066               | 1.56                         | -34.77                        | 0.4175 | 7.28   | 0.101                             | 7.116   | 7.203           | 7.267  | 7.33            | 7.662                   |         |
| C12orf60  | EILTTd7nASSwTX6i3o | rs11614445 | 3.39                         | 3.24                                  | 0.061                | 1.88                         | -7.74                         | 0.1709 | 7.28   | 0.101                             | 7.116   | 7.203           | 7.267  | 7.33            | 7.662                   |         |
| C12orf60  | EILTTd7nASSwTX6i3o | rs11610238 | 4                            | 3.83                                  | -0.071               | 1.53                         | -1.07                         | 0.435  | 7.28   | 0.101                             | 7.116   | 7.203           | 7.267  | 7.33            | 7.662                   |         |
| C14orf130 | WKgj5UpR4SiY1XDoxU | rs7157141  | 3.67                         | 3.52                                  | -0.07                | 1.72                         | -43.46                        | 0.4525 | 7.983  | 0.236                             | 7.5     | 7.82            | 7.952  | 8.133           | 8.85                    |         |
| C14orf130 | WKgj5UpR4SiY1XDoxU | rs1268843  | 5.24                         | 5.01                                  | -0.103               | 2.64                         | -29.04                        | 0.2425 | 7.983  | 0.236                             | 7.5     | 7.82            | 7.952  | 8.133           | 8.85                    |         |
| C14orf130 | WKgj5UpR4SiY1XDoxU | rs1270629  | 7.5                          | 7.16                                  | 0.148                | 4.71                         | -27.01                        | 0.2513 | 7.983  | 0.236                             | 7.5     | 7.82            | 7.952  | 8.133           | 8.85                    |         |
| C14orf130 | WKgj5UpR4SiY1XDoxU | rs1046099  | 4.35                         | 4.17                                  | -0.083               | 2.38                         | -23.92                        | 0.3275 | 7.983  | 0.236                             | 7.5     | 7.82            | 7.952  | 8.133           | 8.85                    |         |
| C14orf130 | WKgj5UpR4SiY1XDoxU | rs2749411  | 3.73                         | 3.57                                  | 0.072                | 1.68                         | 1.67                          | 0.27   | 7.983  | 0.236                             | 7.5     | 7.82            | 7.952  | 8.133           | 8.85                    |         |
| C14orf130 | WKgj5UpR4SiY1XDoxU | rs1029795  | 6.31                         | 6.03                                  | 0.124                | 1.69                         | 5.33                          | 0.4472 | 7.983  | 0.236                             | 7.5     | 7.82            | 7.952  | 8.133           | 8.85                    |         |
| C14orf130 | WKgj5UpR4SiY1XDoxU | rs1017097  | 4.7                          | 4.50                                  | 0.092                | 2.02                         | 7.25                          | 0.3525 | 7.983  | 0.236                             | 7.5     | 7.82            | 7.952  | 8.133           | 8.85                    |         |
| C14orf130 | WKgj5UpR4SiY1XDoxU | rs3783899  | 5.46                         | 5.22                                  | -0.105               | 3.08                         | 9.44                          | 0.14   | 7.983  | 0.236                             | 7.5     | 7.82            | 7.952  | 8.133           | 8.85                    |         |
| C14orf130 | WKgj5UpR4SiY1XDoxU | rs11160108 | 10.78                        | 10.28                                 | -0.213               | 5.3                          | -0.28                         | 0.41   | 7.983  | 0.236                             | 7.5     | 7.82            | 7.952  | 8.133           | 8.85                    |         |
| C14orf130 | WKgj5UpR4SiY1XDoxU | rs2905     | 22.48                        | 21.42                                 | 0.399                | 7.5                          | -0.04                         | 0.3075 | 7.983  | 0.236                             | 7.5     | 7.82            | 7.952  | 8.133           | 8.85                    |         |
| C14orf130 | WKgj5UpR4SiY1XDoxU | rs10144530 | 14.89                        | 14.20                                 | -0.291               | 6.88                         | 0.15                          | 0.495  | 7.983  | 0.236                             | 7.5     | 7.82            | 7.952  | 8.133           | 8.85                    |         |
| C14orf130 | WKgj5UpR4SiY1XDoxU | rs1263429  | 5.97                         | 5.71                                  | 0.117                | 2.57                         | 38.37                         | 0.2025 | 7.983  | 0.236                             | 7.5     | 7.82            | 7.952  | 8.133           | 8.85                    |         |
| C14orf132 | ZnFQkXr9FOY0eH3cS4 | rs17093643 | 6.15                         | 5.87                                  | 0.12                 | 3.21                         | -49.98                        | 0.1125 | 7.984  | 0.44                              | 7.171   | 7.669           | 7.948  | 8.265           | 9.95                    |         |
| C14orf132 | ZnFQkXr9FOY0eH3cS4 | rs1998522  | 5.59                         | 5.34                                  | 0.108                | 0.76                         | -45.42                        | 0.3291 | 7.984  | 0.44                              | 7.171   | 7.669           | 7.948  | 8.265           | 9.95                    |         |
| C14orf132 | ZnFQkXr9FOY0eH3cS4 | rs1886059  | 24.9                         | 23.72                                 | -0.443               | 5.06                         | -44.01                        | 0.2096 | 7.984  | 0.44                              | 7.171   | 7.669           | 7.948  | 8.265           | 9.95                    |         |
| C14orf132 | ZnFQkXr9FOY0eH3cS4 | rs11626041 | 5.94                         | 5.68                                  | 0.114                | 0.87                         | -41.28                        | 0.325  | 7.984  | 0.44                              | 7.171   | 7.669           | 7.948  | 8.265           | 9.95                    |         |
| C14orf132 | ZnFQkXr9FOY0eH3cS4 | rs4274360  | 24.59                        | 23.43                                 | -0.423               | 4.8                          | -9.8                          | 0.185  | 7.984  | 0.44                              | 7.171   | 7.669           | 7.948  | 8.265           | 9.95                    |         |
| C14orf132 | ZnFQkXr9FOY0eH3cS4 | rs7147874  | 4.28                         | 4.10                                  | 0.087                | 3.61                         | 3.1                           | 0.34   | 7.984  | 0.44                              | 7.171   | 7.669           | 7.948  | 8.265           | 9.95                    |         |
| C14orf145 | HLtwgbPV.EZ43XLogo | rs10129556 | 3.45                         | 3.31                                  | 0.068                | 1.67                         | -47.93                        | 0.05   | 7.517  | 0.15                              | 7.18    | 7.417           | 7.507  | 7.612           | 8.068                   |         |
| C14orf145 | HLtwgbPV.EZ43XLogo | rs1868633  | 3.31                         | 3.17                                  | 0.066                | 1.05                         | 46.4                          | 0.16   | 7.517  | 0.15                              | 7.18    | 7.417           | 7.507  | 7.612           | 8.068                   |         |
| C14orf145 | HLtwgbPV.EZ43XLogo | rs12878113 | 3.55                         | 3.40                                  | -0.072               | 0.13                         | 69.7                          | 0.1375 | 7.517  | 0.15                              | 7.18    | 7.417           | 7.507  | 7.612           | 8.068                   |         |
| C14orf145 | HLtwgbPV.EZ43XLogo | rs17110817 | 4.68                         | 4.47                                  | -0.098               | 1.68                         | 87.61                         | 0.17   | 7.517  | 0.15                              | 7.18    | 7.417           | 7.507  | 7.612           | 8.068                   |         |
| C14orf145 | HLtwgbPV.EZ43XLogo | rs17110831 | 4.06                         | 3.89                                  | 0.084                | 1.45                         | 93.18                         | 0.1725 | 7.517  | 0.15                              | 7.18    | 7.417           | 7.507  | 7.612           | 8.068                   |         |
| C14orf145 | HLtwgbPV.EZ43XLogo | rs8003492  | 4.69                         | 4.49                                  | 0.097                | 0.75                         | 122.53                        | 0.3725 | 7.517  | 0.15                              | 7.18    | 7.417           | 7.507  | 7.612           | 8.068                   |         |
| C14orf145 | HLtwgbPV.EZ43XLogo | rs7142417  | 3.68                         | 3.52                                  | 0.073                | 1.07                         | 131.21                        | 0.2975 | 7.517  | 0.15                              | 7.18    | 7.417           | 7.507  | 7.612           | 8.068                   |         |
| C14orf145 | HLtwgbPV.EZ43XLogo | rs1547500  | 3.44                         | 3.29                                  | -0.071               | 0.02                         | 132.83                        | 0.2725 | 7.517  | 0.15                              | 7.18    | 7.417           | 7.507  | 7.612           | 8.068                   |         |
| C14orf145 | HLtwgbPV.EZ43XLogo | rs7157843  | 4.31                         | 4.12                                  | -0.089               | 0.1                          | 139.26                        | 0.215  | 7.517  | 0.15                              | 7.18    | 7.417           | 7.507  | 7.612           | 8.068                   |         |
| C14orf145 | HLtwgbPV.EZ43XLogo | rs7158869  | 4.23                         | 4.04                                  | 0.088                | 0.4                          | 139.68                        | 0.4225 | 7.517  | 0.15                              | 7.18    | 7.417           | 7.507  | 7.612           | 8.068                   |         |
| C14orf145 | HLtwgbPV.EZ43XLogo | rs7149459  | 3.55                         | 3.40                                  | -0.072               | 0.19                         | 141.89                        | 0.1375 | 7.517  | 0.15                              | 7.18    | 7.417           | 7.507  | 7.612           | 8.068                   |         |
| C14orf145 | HLtwgbPV.EZ43XLogo | rs6574594  | 3.32                         | 3.18                                  | 0.066                | 0.15                         | 148.32                        | 0.1357 | 7.517  | 0.15                              | 7.18    | 7.417           | 7.507  | 7.612           | 8.068                   |         |
| C14orf145 | HLtwgbPV.EZ43XLogo | rs328239   | 3.83                         | 3.66                                  | 0.076                | 1.24                         | -198.6                        | 0.4925 | 7.517  | 0.15                              | 7.18    | 7.417           | 7.507  | 7.612           | 8.068                   |         |
| C14orf145 | HLtwgbPV.EZ43XLogo | rs6574605  | 4.13                         | 3.95                                  | -0.085               | 1.44                         | -191.3                        | 0.4124 | 7.517  | 0.15                              | 7.18    | 7.417           | 7.507  | 7.612           | 8.068                   |         |
| C14orf145 | HLtwgbPV.EZ43XLogo | rs2590480  | 3.85                         | 3.69                                  | -0.078               | 1.65                         | -181.56                       | 0.41   | 7.517  | 0.15                              | 7.18    | 7.417           | 7.507  | 7.612           | 8.068                   |         |
| C14orf151 | K722cfrtKVHIEKtVBY | rs4983382  | 7.68                         | 7.33                                  | -0.157               | 2.14                         | 18.36                         | 0.2374 | 7.727  | 0.249                             | 7.175   | 7.546           | 7.743  | 7.887           | 8.584                   |         |
| C14orf151 | K722cfrtKVHIEKtVBY | rs4983540  | 3.88                         | 3.74                                  | 0.074                | 1.5                          | 37.42                         | 0.198  | 7.727  | 0.249                             | 7.175   | 7.546           | 7.743  | 7.887           | 8.584                   |         |
| C14orf173 | Qf5R5SI3leSeAfpTQ  | rs4983382  | 5.38                         | 5.11                                  | -0.108               | 1.35                         | 3.56                          | 0.2374 | 8.683  | 0.609                             | 7.45    | 8.23            | 8.593  | 9.061           | 10.461                  |         |
| C14orf173 | Qf5R5SI3leSeAfpTQ  | rs4983540  | 3.51                         | 3.36                                  | 0.067                | 1.08                         | 22.63                         | 0.198  | 8.683  | 0.609                             | 7.45    | 8.23            | 8.593  | 9.061           | 10.461                  |         |
| C14orf174 | QulgB09GOHnQF1dl6o | rs1046428  | 3.85                         | 3.69                                  | 0.078                | 1.25                         | -49.48                        | 0.215  | 7.872  | 0.198                             | 7.363   | 7.737           | 7.869  | 8.006           | 8.936                   |         |
| C14orf32  | iTV_PXV47rAekR1Krc | rs2340943  | 3.61                         | 3.46                                  | 0.064                | 2.33                         | -0.39                         | 0.2125 | 9.876  | 0.232                             | 8.993   | 9.742           | 9.894  | 10.026          | 10.469                  |         |
| C14orf32  | iTV_PXV47rAekR1Krc | rs11626816 | 3.91                         | 3.74                                  | -0.071               | 1.84                         | 28.42                         | 0.26   | 9.876  | 0.232                             | 8.993   | 9.742           | 9.894  | 10.026          | 10.469                  |         |
| C14orf32  | iTV_PXV47rAekR1Krc | rs11627884 | 3.91                         | 3.74                                  | -0.071               | 1.84                         | 28.94                         | 0.26   | 9.876  | 0.232                             | 8.993   | 9.742           | 9.894  | 10.026          | 10.469                  |         |
| C14orf43  | 34Kf76KoSJEoEL_Et4 | rs6830     | 3.7                          | 3.52                                  | 0.071                | 1.97                         | -13.39                        | 0.3125 | 9.488  | 0.329                             | 8.482   | 9.314           | 9.49   | 9.7             | 10.796                  |         |
| C14orf79  | oiXeuPw6iVUvN5woAc | rs2241865  | 12.18                        | 11.64                                 | 0.216                | 3.08                         | -2.71                         | 0.1142 | 7.31   | 0.132                             | 7.127   | 7.233           | 7.283  | 7.372           | 8.324                   | Yes     |
| C14orf94  | oyeeXXDFxnLqFF9F6o | rs2295687  | 5.73                         | 5.48                                  | -0.117               | 3.19                         | -5.22                         | 0.4475 | 9.542  | 0.379                             | 8.537   | 9.345           | 9.575  | 9.792           | 10.822                  |         |
| C14orf94  | oyeeXXDFxnLqFF9F6o | rs3751497  | 3.84                         | 3.68                                  | 0.075                | 2.57                         | 49.63                         | 0.4225 | 9.542  | 0.379                             | 8.537   | 9.345           | 9.575  | 9.792           | 10.822                  |         |
| C16orf30  | N1J.XryZBmnUYURkFQ | rs2745111  | 4.23                         | 4.05                                  | -0.079               | 2.86                         | -18.84                        | 0.145  | 10.382 | 0.474                             | 8.597   | 10.101          | 10.365 | 10.674          | 11.545                  |         |
| C16orf30  | N1J.XryZBmnUYURkFQ | rs2235638  | 3.35                         | 3.20                                  | -0.061               | 1.05                         | -9.77                         | 0.0678 | 10.382 | 0.474                             | 8.597   | 10.101          | 10.365 | 10.674          | 11.545                  |         |

| Symbol   | Lumi nuID           | SNP        | Population-based association p-value (-log10) | Population-based association p-value (-log10), GC adj. | % Variance Explained | Family-based association p-value (-log10) | Distance from transcript (kb) | MAF    | Transcript abundance (log2 scale) |                    |         |                 |        |                 | SNP mapping under probe |         |
|----------|---------------------|------------|-----------------------------------------------|--------------------------------------------------------|----------------------|-------------------------------------------|-------------------------------|--------|-----------------------------------|--------------------|---------|-----------------|--------|-----------------|-------------------------|---------|
|          |                     |            |                                               |                                                        |                      |                                           |                               |        | Mean                              | Standard Deviation | Minimum | 25th percentile | Median | 75th percentile |                         | Maximum |
| C16orf30 | N1J.XryZBmnUYURkfQ  | rs8049972  | 5.55                                          | 5.30                                                   | 0.105                | 1.6                                       | 9.95                          | 0.09   | 10.382                            | 0.474              | 8.597   | 10.101          | 10.365 | 10.674          | 11.545                  |         |
| C16orf30 | N1J.XryZBmnUYURkfQ  | rs11648609 | 5.2                                           | 4.97                                                   | 0.098                | 1.66                                      | 10.62                         | 0.0603 | 10.382                            | 0.474              | 8.597   | 10.101          | 10.365 | 10.674          | 11.545                  |         |
| C16orf30 | N1J.XryZBmnUYURkfQ  | rs8052868  | 6.95                                          | 6.64                                                   | 0.132                | 1.62                                      | 21.93                         | 0.125  | 10.382                            | 0.474              | 8.597   | 10.101          | 10.365 | 10.674          | 11.545                  |         |
| C16orf30 | N1J.XryZBmnUYURkfQ  | rs9934342  | 6.95                                          | 6.64                                                   | -0.132               | 1.76                                      | 27.38                         | 0.125  | 10.382                            | 0.474              | 8.597   | 10.101          | 10.365 | 10.674          | 11.545                  |         |
| C16orf33 | xeunif.VJKDq12DTbk  | rs216596   | 8.15                                          | 7.78                                                   | -0.161               | 1.99                                      | -2.12                         | 0.165  | 9.435                             | 0.302              | 8.732   | 9.218           | 9.412  | 9.637           | 10.326                  |         |
| C16orf33 | xeunif.VJKDq12DTbk  | rs1045001  | 8.19                                          | 7.82                                                   | 0.162                | 2.03                                      | -0.17                         | 0.16   | 9.435                             | 0.302              | 8.732   | 9.218           | 9.412  | 9.637           | 10.326                  |         |
| C16orf33 | xeunif.VJKDq12DTbk  | rs216600   | 5.96                                          | 5.70                                                   | 0.116                | 2.36                                      | 2.72                          | 0.1525 | 9.435                             | 0.302              | 8.732   | 9.218           | 9.412  | 9.637           | 10.326                  |         |
| C16orf70 | c6epT9OnQJd6qdCgp4  | rs9033     | 3.64                                          | 3.49                                                   | -0.074               | 0.49                                      | -0.44                         | 0.4523 | 7.433                             | 0.124              | 7.145   | 7.35            | 7.435  | 7.518           | 7.71                    |         |
| C16orf72 | HG0ydl.3nXtlcH6TqQ  | rs3743832  | 4.25                                          | 4.07                                                   | -0.081               | 1.9                                       | 0.32                          | 0.4196 | 9.436                             | 0.295              | 8.511   | 9.266           | 9.484  | 9.643           | 10.029                  |         |
| C16orf72 | HG0ydl.3nXtlcH6TqQ  | rs9926522  | 4.22                                          | 4.04                                                   | -0.081               | 1.8                                       | 3.39                          | 0.415  | 9.436                             | 0.295              | 8.511   | 9.266           | 9.484  | 9.643           | 10.029                  |         |
| C16orf75 | 3aVeAhBJ1f3n2hFHQE  | rs8057417  | 9.3                                           | 8.88                                                   | 0.191                | 1.58                                      | -46.54                        | 0.255  | 8.126                             | 0.268              | 7.481   | 7.937           | 8.111  | 8.273           | 8.823                   | Yes     |
| C16orf75 | 3aVeAhBJ1f3n2hFHQE  | rs12596260 | 3.64                                          | 3.48                                                   | -0.07                | 1.59                                      | -41.05                        | 0.2225 | 8.126                             | 0.268              | 7.481   | 7.937           | 8.111  | 8.273           | 8.823                   | Yes     |
| C16orf75 | 3aVeAhBJ1f3n2hFHQE  | rs12928822 | 6.35                                          | 6.06                                                   | 0.125                | 2.73                                      | -35.42                        | 0.1975 | 8.126                             | 0.268              | 7.481   | 7.937           | 8.111  | 8.273           | 8.823                   | Yes     |
| C16orf75 | 3aVeAhBJ1f3n2hFHQE  | rs12927773 | 6.39                                          | 6.11                                                   | 0.126                | 2.73                                      | -35.35                        | 0.2    | 8.126                             | 0.268              | 7.481   | 7.937           | 8.111  | 8.273           | 8.823                   | Yes     |
| C16orf75 | 3aVeAhBJ1f3n2hFHQE  | rs1345879  | 11.27                                         | 10.75                                                  | -0.223               | 2.37                                      | -34.55                        | 0.28   | 8.126                             | 0.268              | 7.481   | 7.937           | 8.111  | 8.273           | 8.823                   | Yes     |
| C16orf75 | 3aVeAhBJ1f3n2hFHQE  | rs7191700  | 16.44                                         | 15.67                                                  | 0.311                | 5.74                                      | -32.51                        | 0.36   | 8.126                             | 0.268              | 7.481   | 7.937           | 8.111  | 8.273           | 8.823                   | Yes     |
| C16orf75 | 3aVeAhBJ1f3n2hFHQE  | rs7203508  | 12.24                                         | 11.67                                                  | 0.247                | 3.77                                      | -10.68                        | 0.4091 | 8.126                             | 0.268              | 7.481   | 7.937           | 8.111  | 8.273           | 8.823                   | Yes     |
| C16orf80 | HI5V.LuqojF.FOB8SDw | rs10445014 | 4.68                                          | 4.47                                                   | -0.094               | 2.25                                      | -2.32                         | 0.0725 | 9.44                              | 0.235              | 8.843   | 9.285           | 9.457  | 9.597           | 10.316                  |         |
| C16orf80 | HI5V.LuqojF.FOB8SDw | rs11860708 | 5.76                                          | 5.51                                                   | 0.117                | 2.35                                      | 15.3                          | 0.085  | 9.44                              | 0.235              | 8.843   | 9.285           | 9.457  | 9.597           | 10.316                  |         |
| C16orf80 | HI5V.LuqojF.FOB8SDw | rs1875525  | 3.79                                          | 3.63                                                   | -0.075               | 2.28                                      | 38.55                         | 0.065  | 9.44                              | 0.235              | 8.843   | 9.285           | 9.457  | 9.597           | 10.316                  |         |
| C16orf80 | HI5V.LuqojF.FOB8SDw | rs1875522  | 3.79                                          | 3.63                                                   | -0.075               | 2.28                                      | 38.81                         | 0.065  | 9.44                              | 0.235              | 8.843   | 9.285           | 9.457  | 9.597           | 10.316                  |         |
| C16orf80 | HI5V.LuqojF.FOB8SDw | rs1393203  | 3.79                                          | 3.63                                                   | -0.075               | 2.28                                      | 43.91                         | 0.065  | 9.44                              | 0.235              | 8.843   | 9.285           | 9.457  | 9.597           | 10.316                  |         |
| C17orf48 | Zru.f560RU466cd4o0  | rs2662959  | 3.57                                          | 3.42                                                   | 0.069                | 2.78                                      | -17.38                        | 0.3925 | 9.628                             | 0.317              | 8.638   | 9.431           | 9.631  | 9.804           | 10.423                  |         |
| C17orf75 | c.y7dHpVMD1GFsgvkv  | rs763545   | 4.13                                          | 3.96                                                   | -0.08                | 1.58                                      | -32.65                        | 0.4    | 7.574                             | 0.285              | 7.121   | 7.354           | 7.532  | 7.746           | 8.478                   |         |
| C17orf75 | c.y7dHpVMD1GFsgvkv  | rs17732573 | 4.4                                           | 4.21                                                   | 0.085                | 1.92                                      | -30.72                        | 0.4675 | 7.574                             | 0.285              | 7.121   | 7.354           | 7.532  | 7.746           | 8.478                   |         |
| C17orf75 | c.y7dHpVMD1GFsgvkv  | rs4794915  | 8.44                                          | 8.06                                                   | -0.165               | 3.79                                      | -24.02                        | 0.4271 | 7.574                             | 0.285              | 7.121   | 7.354           | 7.532  | 7.746           | 8.478                   |         |
| C17orf75 | c.y7dHpVMD1GFsgvkv  | rs2041306  | 13.62                                         | 12.99                                                  | -0.259               | 5.29                                      | -3.51                         | 0.4125 | 7.574                             | 0.285              | 7.121   | 7.354           | 7.532  | 7.746           | 8.478                   |         |
| C17orf75 | c.y7dHpVMD1GFsgvkv  | rs11080180 | 5.94                                          | 5.68                                                   | 0.118                | 2.56                                      | 13.81                         | 0.4175 | 7.574                             | 0.285              | 7.121   | 7.354           | 7.532  | 7.746           | 8.478                   |         |
| C17orf75 | c.y7dHpVMD1GFsgvkv  | rs2286645  | 13.35                                         | 12.73                                                  | -0.255               | 5.83                                      | 27.1                          | 0.415  | 7.574                             | 0.285              | 7.121   | 7.354           | 7.532  | 7.746           | 8.478                   |         |
| C17orf80 | ICX24fd3LI9uV7vIR4  | rs1052705  | 6.25                                          | 5.97                                                   | 0.119                | 1.28                                      | -36.89                        | 0.4825 | 7.841                             | 0.241              | 7.168   | 7.69            | 7.853  | 8.002           | 8.372                   |         |
| C17orf80 | ICX24fd3LI9uV7vIR4  | rs1010442  | 6.25                                          | 5.97                                                   | 0.119                | 1.27                                      | -36.4                         | 0.4825 | 7.841                             | 0.241              | 7.168   | 7.69            | 7.853  | 8.002           | 8.372                   |         |
| C17orf80 | ICX24fd3LI9uV7vIR4  | rs4969082  | 3.29                                          | 3.15                                                   | -0.058               | 0.88                                      | -34.34                        | 0.295  | 7.841                             | 0.241              | 7.168   | 7.69            | 7.853  | 8.002           | 8.372                   |         |
| C17orf80 | ICX24fd3LI9uV7vIR4  | rs1026128  | 6.25                                          | 5.97                                                   | 0.119                | 1.28                                      | -32.55                        | 0.4825 | 7.841                             | 0.241              | 7.168   | 7.69            | 7.853  | 8.002           | 8.372                   |         |
| C17orf80 | ICX24fd3LI9uV7vIR4  | rs8076989  | 3.84                                          | 3.68                                                   | -0.071               | 1.14                                      | -17.42                        | 0.385  | 7.841                             | 0.241              | 7.168   | 7.69            | 7.853  | 8.002           | 8.372                   |         |
| C17orf80 | ICX24fd3LI9uV7vIR4  | rs3736364  | 6.63                                          | 6.33                                                   | 0.126                | 1.29                                      | -0.59                         | 0.465  | 7.841                             | 0.241              | 7.168   | 7.69            | 7.853  | 8.002           | 8.372                   |         |
| C17orf80 | ICX24fd3LI9uV7vIR4  | rs12449824 | 6.58                                          | 6.29                                                   | -0.126               | 1.29                                      | 0.96                          | 0.4675 | 7.841                             | 0.241              | 7.168   | 7.69            | 7.853  | 8.002           | 8.372                   |         |
| C17orf80 | ICX24fd3LI9uV7vIR4  | rs4605239  | 7.19                                          | 6.87                                                   | -0.138               | 1.55                                      | -6.71                         | 0.465  | 7.841                             | 0.241              | 7.168   | 7.69            | 7.853  | 8.002           | 8.372                   |         |
| C17orf80 | ICX24fd3LI9uV7vIR4  | rs1566286  | 6.8                                           | 6.49                                                   | -0.131               | 1.35                                      | -5.23                         | 0.4625 | 7.841                             | 0.241              | 7.168   | 7.69            | 7.853  | 8.002           | 8.372                   |         |
| C17orf80 | ICX24fd3LI9uV7vIR4  | rs7211297  | 6.29                                          | 6.01                                                   | -0.12                | 1.13                                      | 6.03                          | 0.4749 | 7.841                             | 0.241              | 7.168   | 7.69            | 7.853  | 8.002           | 8.372                   |         |
| C18orf10 | TFhPJSnbLil1lkr7ns  | rs621834   | 3.85                                          | 3.69                                                   | 0.072                | 1.57                                      | -24.5                         | 0.3025 | 8.235                             | 0.276              | 7.106   | 8.054           | 8.245  | 8.402           | 9.147                   |         |
| C18orf10 | TFhPJSnbLil1lkr7ns  | rs12373339 | 6.78                                          | 6.48                                                   | 0.13                 | 0.73                                      | 1.99                          | 0.2875 | 8.235                             | 0.276              | 7.106   | 8.054           | 8.245  | 8.402           | 9.147                   |         |
| C18orf10 | TFhPJSnbLil1lkr7ns  | rs1045781  | 10.16                                         | 9.70                                                   | -0.193               | 0.92                                      | -10.24                        | 0.265  | 8.235                             | 0.276              | 7.106   | 8.054           | 8.245  | 8.402           | 9.147                   |         |
| C18orf10 | TFhPJSnbLil1lkr7ns  | rs3909692  | 10.43                                         | 9.95                                                   | -0.199               | 1.09                                      | 27.21                         | 0.28   | 8.235                             | 0.276              | 7.106   | 8.054           | 8.245  | 8.402           | 9.147                   |         |
| C18orf21 | xp2ApCJUK2v9IEXE3o  | rs1893790  | 3.78                                          | 3.62                                                   | 0.072                | 2.98                                      | -8.93                         | 0.075  | 9.577                             | 0.214              | 8.327   | 9.476           | 9.597  | 9.721           | 9.965                   |         |
| C18orf21 | xp2ApCJUK2v9IEXE3o  | rs2276314  | 4.63                                          | 4.43                                                   | -0.095               | 3.91                                      | -1.77                         | 0.205  | 9.577                             | 0.214              | 8.327   | 9.476           | 9.597  | 9.721           | 9.965                   |         |
| C18orf21 | xp2ApCJUK2v9IEXE3o  | rs4799838  | 4.41                                          | 4.22                                                   | 0.091                | 3.79                                      | 38.29                         | 0.2111 | 9.577                             | 0.214              | 8.327   | 9.476           | 9.597  | 9.721           | 9.965                   |         |
| C18orf21 | xp2ApCJUK2v9IEXE3o  | rs10502656 | 4.59                                          | 4.39                                                   | -0.089               | 2.97                                      | 49.15                         | 0.075  | 9.577                             | 0.214              | 8.327   | 9.476           | 9.597  | 9.721           | 9.965                   |         |
| C18orf45 | rVSKASr84keEjt9XqQ  | rs1865307  | 4.25                                          | 4.07                                                   | -0.083               | 2.03                                      | 4.31                          | 0.4525 | 7.313                             | 0.139              | 7.111   | 7.215           | 7.284  | 7.354           | 7.794                   | Yes     |
| C18orf45 | rVSKASr84keEjt9XqQ  | rs4800466  | 3.92                                          | 3.76                                                   | -0.077               | 1.91                                      | 15.05                         | 0.4925 | 7.313                             | 0.139              | 7.111   | 7.215           | 7.284  | 7.354           | 7.794                   | Yes     |
| C18orf45 | rVSKASr84keEjt9XqQ  | rs8092489  | 3.93                                          | 3.76                                                   | 0.077                | 1.65                                      | 21.33                         | 0.445  | 7.313                             | 0.139              | 7.111   | 7.215           | 7.284  | 7.354           | 7.794                   | Yes     |
| C19orf12 | ieUqXZ31TeALXrL34o  | rs6509542  | 7.89                                          | 7.54                                                   | -0.158               | 3.51                                      | -38.77                        | 0.235  | 8.967                             | 0.386              | 7.966   | 8.751           | 8.981  | 9.228           | 10.14                   |         |
| C19orf12 | ieUqXZ31TeALXrL34o  | rs9566     | 3.67                                          | 3.52                                                   | -0.07                | 1.04                                      | -0.12                         | 0.3425 | 8.967                             | 0.386              | 7.966   | 8.751           | 8.981  | 9.228           | 10.14                   |         |
| C19orf12 | ieUqXZ31TeALXrL34o  | rs3746314  | 4.58                                          | 4.38                                                   | -0.092               | 0.4                                       | 4.55                          | 0.0955 | 8.967                             | 0.386              | 7.966   | 8.751           | 8.981  | 9.228           | 10.14                   |         |
| C19orf28 | Td6KP6rIXdpKqSgsoM  | rs3760999  | 3.64                                          | 3.48                                                   | -0.071               | 1.3                                       | -23.64                        | 0.27   | 8.206                             | 0.331              | 7.554   | 7.961           | 8.141  | 8.366           | 9.567                   |         |
| C19orf28 | Td6KP6rIXdpKqSgsoM  | rs10155    | 3.65                                          | 3.49                                                   | 0.072                | 1.55                                      | -9.36                         | 0.2688 | 8.206                             | 0.331              | 7.554   | 7.961           | 8.141  | 8.366           | 9.567                   |         |
| C19orf28 | Td6KP6rIXdpKqSgsoM  | rs17674497 | 3.54                                          | 3.39                                                   | 0.07                 | 1.51                                      | 1.68                          | 0.285  | 8.206                             | 0.331              | 7.554   | 7.961           | 8.141  | 8.366           | 9.567                   |         |
| C19orf48 | 9kpQkqQVRFfHMAk34I  | rs9991     | 3.9                                           | 3.74                                                   | -0.073               | 3.17                                      | 0.27                          | 0.3116 | 9.146                             | 0.234              | 8.514   | 8.988           | 9.13   | 9.277           | 10.064                  |         |
| C19orf48 | 9kpQkqQVRFfHMAk34I  | rs4801853  | 3.74                                          | 3.58                                                   | 0.07                 | 3.01                                      | 0.43                          | 0.3116 | 9.146                             | 0.234              | 8.514   | 8.988           | 9.13   | 9.277           | 10.064                  |         |
| C19orf48 | 9kpQkqQVRFfHMAk34I  | rs3745528  | 3.88                                          | 3.72                                                   | 0.072                | 3.01                                      | 1.1                           | 0.31   | 9.146                             | 0.234              | 8.514   | 8.988           | 9.13   | 9.277           | 10.064                  |         |
| C19orf48 | 9kpQkqQVRFfHMAk34I  | rs2288417  | 3.69                                          | 3.53                                                   | 0.068                | 4.52                                      | 0.08                          | 0.125  | 9.146                             | 0.234              | 8.514   | 8.988           | 9.13   | 9.277           | 10.064                  |         |
| C19orf48 | 9kpQkqQVRFfHMAk34I  | rs12052047 | 3.64                                          | 3.49                                                   | -0.068               | 4.37                                      | 13.11                         | 0.1256 | 9.146                             | 0.234              | 8.514   | 8.988           | 9.13   | 9.277           | 10.064                  |         |
| C1QR1    | iukJL3.SSP_VHPXeJ4  | rs844879   | 3.3                                           | 3.16                                                   | 0.06                 | 1.14                                      | 35.69                         | 0.1025 | 9.67                              | 1.132              | 7.519   | 8.702           | 9.552  | 10.591          | 12.453                  |         |

| Symbol    | Lumi nuID           | SNP        | Population-based | Population-based          | % Variance | Family-based     | Distance from | MAF    | Mean      | Transcript abundance (log2 scale) |            |            |            |         | SNP mapping under probe |         |
|-----------|---------------------|------------|------------------|---------------------------|------------|------------------|---------------|--------|-----------|-----------------------------------|------------|------------|------------|---------|-------------------------|---------|
|           |                     |            | association      | association               |            | association      |               |        |           | transcript (kb)                   | Standard   | 25th       | Median     | 75th    |                         | Maximum |
|           |                     |            | p-value (-log10) | p-value (-log10), GC adj. | Explained  | p-value (-log10) |               |        | Deviation | Minimum                           | percentile | percentile | percentile | Maximum |                         |         |
| C1QTNF1   | BCZVgppWOXhp05pdfv4 | rs3744168  | 5.2              | 4.97                      | -0.103     | 0.79             | -42.71        | 0.2387 | 7.124     | 0.021                             | 7.097      | 7.11       | 7.118      | 7.131   | 7.245                   |         |
| C1QTNF1   | BCZVgppWOXhp05pdfv4 | rs2377301  | 3.68             | 3.53                      | 0.07       | 0.53             | -36.1         | 0.12   | 7.124     | 0.021                             | 7.097      | 7.11       | 7.118      | 7.131   | 7.245                   |         |
| C1QTNF1   | BCZVgppWOXhp05pdfv4 | rs9916285  | 5.22             | 4.99                      | -0.103     | 0.57             | -35.63        | 0.24   | 7.124     | 0.021                             | 7.097      | 7.11       | 7.118      | 7.131   | 7.245                   |         |
| C1QTNF1   | BCZVgppWOXhp05pdfv4 | rs9896857  | 4.76             | 4.55                      | 0.092      | 0.56             | -33.73        | 0.1775 | 7.124     | 0.021                             | 7.097      | 7.11       | 7.118      | 7.131   | 7.245                   |         |
| C1QTNF1   | BCZVgppWOXhp05pdfv4 | rs4789848  | 4.13             | 3.95                      | 0.079      | 0.21             | -27.11        | 0.15   | 7.124     | 0.021                             | 7.097      | 7.11       | 7.118      | 7.131   | 7.245                   |         |
| C1QTNF4   | ixplxJBRpCxNF91p9c  | rs2280231  | 5.01             | 4.79                      | 0.102      | 6.57             | -10.78        | 0.2825 | 7.176     | 0.072                             | 7.103      | 7.134      | 7.154      | 7.19    | 7.585                   |         |
| C1QTNF4   | ixplxJBRpCxNF91p9c  | rs7120548  | 5.42             | 5.18                      | -0.109     | 6.34             | 38.99         | 0.305  | 7.176     | 0.072                             | 7.103      | 7.134      | 7.154      | 7.19    | 7.585                   |         |
| C1QTNF4   | ixplxJBRpCxNF91p9c  | rs10838738 | 7.46             | 7.13                      | -0.151     | 8.7              | 39.11         | 0.3875 | 7.176     | 0.072                             | 7.103      | 7.134      | 7.154      | 7.19    | 7.585                   |         |
| C1QTNF6   | QquC6VWCCDoFRFTJ3VQ | rs4820273  | 3.75             | 3.59                      | -0.075     | 2.91             | 31.35         | 0.14   | 7.253     | 0.074                             | 7.13       | 7.203      | 7.235      | 7.289   | 7.528                   |         |
| C1QTNF6   | QquC6VWCCDoFRFTJ3VQ | rs12170612 | 3.87             | 3.70                      | -0.073     | 3.61             | 47.85         | 0.115  | 7.253     | 0.074                             | 7.13       | 7.203      | 7.235      | 7.289   | 7.528                   |         |
| C1RL      | o1QCkrkOORHzFVJR0o  | rs1801046  | 4.35             | 4.16                      | 0.083      | 1.71             | -4.85         | 0.26   | 8.483     | 0.239                             | 7.988      | 8.321      | 8.505      | 8.652   | 9.532                   |         |
| C1orf123  | rdVLQqQxvlijgFmNVU0 | rs3736118  | 3.56             | 3.41                      | -0.069     | 3.31             | -1.97         | 0.305  | 10.077    | 0.284                             | 7.992      | 9.921      | 10.083     | 10.268  | 10.769                  |         |
| C1orf123  | rdVLQqQxvlijgFmNVU0 | rs2275087  | 3.64             | 3.41                      | 0.069      | 3.11             | 8.1           | 0.305  | 10.077    | 0.284                             | 7.992      | 9.921      | 10.083     | 10.268  | 10.769                  |         |
| C1orf124  | EsEOVoMxtcHEVfXNJ4  | rs2250704  | 4.93             | 4.72                      | -0.101     | 1.29             | -3.34         | 0.3075 | 7.174     | 0.047                             | 7.105      | 7.139      | 7.16       | 7.199   | 7.423                   |         |
| C1orf124  | EsEOVoMxtcHEVfXNJ4  | rs2437150  | 4.63             | 4.43                      | -0.096     | 1.04             | -1.47         | 0.3157 | 7.174     | 0.047                             | 7.105      | 7.139      | 7.16       | 7.199   | 7.423                   |         |
| C1orf124  | EsEOVoMxtcHEVfXNJ4  | rs973252   | 4.97             | 4.76                      | -0.102     | 1.28             | 30.81         | 0.305  | 7.174     | 0.047                             | 7.105      | 7.139      | 7.16       | 7.199   | 7.423                   |         |
| C1orf149  | uUrdX9_ip_qeKDecs   | rs7544462  | 3.43             | 3.28                      | -0.06      | 2                | 4.58          | 0.075  | 7.82      | 0.13                              | 7.472      | 7.732      | 7.809      | 7.916   | 8.295                   |         |
| C1orf156  | Evziop8AN6g7F.hdek  | rs12027035 | 3.37             | 3.23                      | -0.061     | 1.36             | -23.47        | 0.1625 | 8.386     | 0.372                             | 7.117      | 8.203      | 8.441      | 8.659   | 9.129                   |         |
| C1orf156  | Evziop8AN6g7F.hdek  | rs11581380 | 3.42             | 3.27                      | 0.062      | 1.4              | -18.59        | 0.16   | 8.386     | 0.372                             | 7.117      | 8.203      | 8.441      | 8.659   | 9.129                   |         |
| C1orf156  | Evziop8AN6g7F.hdek  | rs2272920  | 8.41             | 8.03                      | -0.171     | 3.28             | 35.85         | 0.0925 | 8.386     | 0.372                             | 7.117      | 8.203      | 8.441      | 8.659   | 9.129                   |         |
| C1orf165  | xWJaLxokf0uKCQMbbU  | rs1934409  | 3.82             | 3.66                      | -0.069     | 1.47             | -19.6         | 0.0975 | 7.364     | 0.113                             | 7.115      | 7.287      | 7.365      | 7.426   | 7.84                    | Yes     |
| C1orf165  | xWJaLxokf0uKCQMbbU  | rs12739065 | 5.45             | 5.22                      | 0.102      | 1.78             | -8.18         | 0.0575 | 7.364     | 0.113                             | 7.115      | 7.287      | 7.365      | 7.426   | 7.84                    | Yes     |
| C1orf178  | 0R3HToffVBPKr5SWg   | rs2358994  | 3.89             | 3.72                      | -0.074     | 1                | -0.54         | 0.18   | 7.162     | 0.045                             | 7.098      | 7.13       | 7.15       | 7.19    | 7.345                   |         |
| C1orf188  | BS8QIZ5.VAdeSV14tY  | rs2247392  | 4.92             | 4.71                      | -0.098     | 2.78             | -10.77        | 0.2775 | 7.718     | 0.296                             | 7.204      | 7.466      | 7.684      | 7.897   | 8.757                   |         |
| C1orf188  | BS8QIZ5.VAdeSV14tY  | rs1064721  | 4.11             | 3.93                      | -0.082     | 1.78             | 0.52          | 0.0575 | 7.718     | 0.296                             | 7.204      | 7.466      | 7.684      | 7.897   | 8.757                   |         |
| C1orf188  | BS8QIZ5.VAdeSV14tY  | rs1802353  | 3.46             | 3.31                      | -0.067     | 0.91             | 3.82          | 0.08   | 7.718     | 0.296                             | 7.204      | 7.466      | 7.684      | 7.897   | 8.757                   |         |
| C1orf38   | o.7wbeUVUd0VUJ3CVU  | rs3766398  | 5.93             | 5.66                      | -0.117     | 2.96             | 3.06          | 0.3317 | 7.556     | 0.277                             | 7.136      | 7.354      | 7.518      | 7.749   | 8.637                   |         |
| C1orf38   | o.7wbeUVUd0VUJ3CVU  | rs3766400  | 5.59             | 5.34                      | -0.11      | 2.6              | 3.13          | 0.3342 | 7.556     | 0.277                             | 7.136      | 7.354      | 7.518      | 7.749   | 8.637                   |         |
| C1orf38   | o.7wbeUVUd0VUJ3CVU  | rs2236074  | 5.24             | 5.01                      | 0.102      | 4.47             | -1.8          | 0.3775 | 7.556     | 0.277                             | 7.136      | 7.354      | 7.518      | 7.749   | 8.637                   |         |
| C1orf38   | o.7wbeUVUd0VUJ3CVU  | rs1467464  | 6.87             | 6.56                      | 0.138      | 4.52             | -1.53         | 0.392  | 7.556     | 0.277                             | 7.136      | 7.354      | 7.518      | 7.749   | 8.637                   |         |
| C1orf38   | o.7wbeUVUd0VUJ3CVU  | rs17257252 | 5.78             | 5.52                      | 0.116      | 3.36             | 7.3           | 0.2286 | 7.556     | 0.277                             | 7.136      | 7.354      | 7.518      | 7.749   | 8.637                   |         |
| C1orf38   | o.7wbeUVUd0VUJ3CVU  | rs7536088  | 7.19             | 6.87                      | -0.144     | 4.97             | 21.14         | 0.3875 | 7.556     | 0.277                             | 7.136      | 7.354      | 7.518      | 7.749   | 8.637                   |         |
| C1orf38   | o.7wbeUVUd0VUJ3CVU  | rs11247723 | 3.34             | 3.20                      | -0.062     | 1.92             | 38.52         | 0.2475 | 7.556     | 0.277                             | 7.136      | 7.354      | 7.518      | 7.749   | 8.637                   |         |
| C1orf48   | We18LINB3SdX7J.7qM  | rs6678961  | 4.2              | 4.02                      | 0.079      | 2.16             | -16.16        | 0.304  | 10.508    | 0.297                             | 8.681      | 10.345     | 10.54      | 10.72   | 11.419                  |         |
| C1orf48   | We18LINB3SdX7J.7qM  | rs15702    | 4.6              | 4.41                      | 0.087      | 2.05             | 0.92          | 0.3075 | 10.508    | 0.297                             | 8.681      | 10.345     | 10.54      | 10.72   | 11.419                  |         |
| C1orf48   | We18LINB3SdX7J.7qM  | rs4951639  | 4.6              | 4.41                      | -0.087     | 2.05             | 10.65         | 0.3075 | 10.508    | 0.297                             | 8.681      | 10.345     | 10.54      | 10.72   | 11.419                  |         |
| C1orf48   | We18LINB3SdX7J.7qM  | rs10864002 | 4.6              | 4.41                      | 0.087      | 2.05             | 32.26         | 0.3075 | 10.508    | 0.297                             | 8.681      | 10.345     | 10.54      | 10.72   | 11.419                  |         |
| C1orf57   | 9llzbhubkiSSguCEbk  | rs10465473 | 6                | 5.74                      | 0.118      | 2.91             | -49.98        | 0.3225 | 8.979     | 0.36                              | 7.764      | 8.757      | 8.945      | 9.19    | 9.96                    | Yes     |
| C1orf57   | 9llzbhubkiSSguCEbk  | rs2224402  | 3.81             | 3.64                      | -0.072     | 1.97             | -34.03        | 0.31   | 8.979     | 0.36                              | 7.764      | 8.757      | 8.945      | 9.19    | 9.96                    | Yes     |
| C1orf57   | 9llzbhubkiSSguCEbk  | rs1555392  | 30.31            | 28.87                     | 0.506      | 6.41             | -26.39        | 0.21   | 8.979     | 0.36                              | 7.764      | 8.757      | 8.945      | 9.19    | 9.96                    | Yes     |
| C1orf57   | 9llzbhubkiSSguCEbk  | rs1555393  | 30.31            | 28.87                     | 0.506      | 6.41             | -26.21        | 0.21   | 8.979     | 0.36                              | 7.764      | 8.757      | 8.945      | 9.19    | 9.96                    | Yes     |
| C1orf57   | 9llzbhubkiSSguCEbk  | rs3820124  | 30.51            | 29.06                     | -0.511     | 6.24             | -1.63         | 0.2075 | 8.979     | 0.36                              | 7.764      | 8.757      | 8.945      | 9.19    | 9.96                    | Yes     |
| C1orf57   | 9llzbhubkiSSguCEbk  | rs12744791 | 12.19            | 11.62                     | -0.241     | 2.47             | 3.36          | 0.1375 | 8.979     | 0.36                              | 7.764      | 8.757      | 8.945      | 9.19    | 9.96                    | Yes     |
| C1orf57   | 9llzbhubkiSSguCEbk  | rs6424261  | 26.29            | 25.04                     | 0.46       | 6.42             | 3.85          | 0.1925 | 8.979     | 0.36                              | 7.764      | 8.757      | 8.945      | 9.19    | 9.96                    | Yes     |
| C1orf57   | 9llzbhubkiSSguCEbk  | rs4141442  | 27.08            | 25.79                     | -0.467     | 5.76             | 12.51         | 0.235  | 8.979     | 0.36                              | 7.764      | 8.757      | 8.945      | 9.19    | 9.96                    | Yes     |
| C1orf57   | 9llzbhubkiSSguCEbk  | rs7523847  | 27.08            | 25.79                     | -0.467     | 5.56             | -13.81        | 0.235  | 8.979     | 0.36                              | 7.764      | 8.757      | 8.945      | 9.19    | 9.96                    | Yes     |
| C1orf57   | 9llzbhubkiSSguCEbk  | rs12035585 | 6.28             | 6.00                      | -0.125     | 1.96             | -11.43        | 0.1225 | 8.979     | 0.36                              | 7.764      | 8.757      | 8.945      | 9.19    | 9.96                    | Yes     |
| C1orf57   | 9llzbhubkiSSguCEbk  | rs743195   | 13.62            | 12.99                     | -0.269     | 3.74             | 13.2          | 0.18   | 8.979     | 0.36                              | 7.764      | 8.757      | 8.945      | 9.19    | 9.96                    | Yes     |
| C1orf57   | 9llzbhubkiSSguCEbk  | rs6424262  | 3.89             | 3.72                      | -0.073     | 1.79             | 29.86         | 0.32   | 8.979     | 0.36                              | 7.764      | 8.757      | 8.945      | 9.19    | 9.96                    | Yes     |
| C1orf84   | 6NzshHNSix11NPoeS1Q | rs710251   | 3.79             | 3.63                      | 0.072      | 2.19             | -29.24        | 0.3275 | 7.185     | 0.048                             | 7.106      | 7.153      | 7.176      | 7.207   | 7.372                   |         |
| C1orf84   | 6NzshHNSix11NPoeS1Q | rs6954     | 3.44             | 3.29                      | 0.064      | 1.36             | 44.08         | 0.36   | 7.185     | 0.048                             | 7.106      | 7.153      | 7.176      | 7.207   | 7.372                   |         |
| C1orf85   | rqEqc_MK1X675ffk3U  | rs933489   | 6.75             | 6.45                      | 0.132      | 1.79             | -27.36        | 0.47   | 9.534     | 0.314                             | 8.764      | 9.341      | 9.507      | 9.715   | 10.628                  |         |
| C1orf85   | rqEqc_MK1X675ffk3U  | rs6684514  | 4.27             | 4.08                      | 0.084      | 2.47             | -7.03         | 0.2875 | 9.534     | 0.314                             | 8.764      | 9.341      | 9.507      | 9.715   | 10.628                  |         |
| C1orf85   | rqEqc_MK1X675ffk3U  | rs10908495 | 4.27             | 4.08                      | 0.084      | 2.47             | 1.46          | 0.2875 | 9.534     | 0.314                             | 8.764      | 9.341      | 9.507      | 9.715   | 10.628                  |         |
| C1orf85   | rqEqc_MK1X675ffk3U  | rs10908496 | 4.27             | 4.08                      | 0.084      | 2.47             | -1.45         | 0.2875 | 9.534     | 0.314                             | 8.764      | 9.341      | 9.507      | 9.715   | 10.628                  |         |
| C1orf85   | rqEqc_MK1X675ffk3U  | rs10908498 | 4.27             | 4.08                      | 0.084      | 2.47             | 12.73         | 0.2875 | 9.534     | 0.314                             | 8.764      | 9.341      | 9.507      | 9.715   | 10.628                  |         |
| C1orf85   | rqEqc_MK1X675ffk3U  | rs2249790  | 3.85             | 3.68                      | 0.076      | 0.98             | 21.91         | 0.26   | 9.534     | 0.314                             | 8.764      | 9.341      | 9.507      | 9.715   | 10.628                  |         |
| C1orf85   | rqEqc_MK1X675ffk3U  | rs10908502 | 4.27             | 4.08                      | -0.084     | 2.47             | 34.63         | 0.2875 | 9.534     | 0.314                             | 8.764      | 9.341      | 9.507      | 9.715   | 10.628                  |         |
| C1orf85   | rqEqc_MK1X675ffk3U  | rs2274226  | 7.14             | 6.82                      | -0.142     | 1.48             | 49.18         | 0.48   | 9.534     | 0.314                             | 8.764      | 9.341      | 9.507      | 9.715   | 10.628                  |         |
| C1orf96   | 9PeigQKepEw0QJUjPRE | rs237802   | 9.37             | 8.95                      | -0.175     | 3.55             | 5.04          | 0.3175 | 7.296     | 0.112                             | 7.113      | 7.223      | 7.278      | 7.355   | 8.096                   |         |
| C20orf195 | uIQWNcwvRTQipYhdRK  | rs438363   | 3.8              | 3.64                      | -0.072     | 0.93             | 10.31         | 0.0833 | 7.288     | 0.152                             | 7.11       | 7.191      | 7.25       | 7.336   | 8.155                   |         |
| C20orf196 | 9OdyR1f13l2l4p6hPE  | rs6139863  | 3.43             | 3.28                      | 0.066      | 1.85             | 22.91         | 0.345  | 8.538     | 0.295                             | 7.772      | 8.335      | 8.541      | 8.738   | 9.484                   |         |

| Symbol    | Lumi nuID          | SNP        | Population-based | Population-based          | % Variance | Family-based     | Distance from   | MAF    | Mean      | Transcript abundance (log2 scale) |            |            |            |         | SNP mapping under probe |     |
|-----------|--------------------|------------|------------------|---------------------------|------------|------------------|-----------------|--------|-----------|-----------------------------------|------------|------------|------------|---------|-------------------------|-----|
|           |                    |            | association      | association               |            | association      |                 |        |           | Standard                          | 25th       | Median     | 75th       | Maximum |                         |     |
|           |                    |            | p-value (-log10) | p-value (-log10), GC adj. | Explained  | p-value (-log10) | transcript (kb) |        | Deviation | Minimum                           | percentile | percentile | percentile | Maximum |                         |     |
| C20orf196 | 9OdyR1f13124p6hPE  | rs2326701  | 3.56             | 3.41                      | -0.069     | 2.03             | 42.19           | 0.325  | 8.538     | 0.295                             | 7.772      | 8.335      | 8.541      | 8.738   | 9.484                   |     |
| C20orf22  | o67h4JQSuEa02CJJIQ | rs2474762  | 4.13             | 3.96                      | 0.081      | 0.65             | -34.3           | 0.0775 | 7.615     | 0.202                             | 7.238      | 7.474      | 7.604      | 7.754   | 8.358                   | Yes |
| C20orf22  | o67h4JQSuEa02CJJIQ | rs11697384 | 14.02            | 13.37                     | 0.276      | 6.02             | -18.78          | 0.2925 | 7.615     | 0.202                             | 7.238      | 7.474      | 7.604      | 7.754   | 8.358                   | Yes |
| C20orf22  | o67h4JQSuEa02CJJIQ | rs2274890  | 16.25            | 15.49                     | -0.321     | 6.29             | 25.64           | 0.25   | 7.615     | 0.202                             | 7.238      | 7.474      | 7.604      | 7.754   | 8.358                   | Yes |
| C20orf22  | o67h4JQSuEa02CJJIQ | rs6083828  | 24.42            | 23.26                     | 0.454      | 9.37             | -1.54           | 0.4225 | 7.615     | 0.202                             | 7.238      | 7.474      | 7.604      | 7.754   | 8.358                   | Yes |
| C20orf22  | o67h4JQSuEa02CJJIQ | rs2482911  | 25.15            | 23.96                     | 0.464      | 9.46             | 24.07           | 0.415  | 7.615     | 0.202                             | 7.238      | 7.474      | 7.604      | 7.754   | 8.358                   | Yes |
| C20orf22  | o67h4JQSuEa02CJJIQ | rs6076347  | 17.44            | 16.62                     | 0.336      | 7.01             | 27.34           | 0.49   | 7.615     | 0.202                             | 7.238      | 7.474      | 7.604      | 7.754   | 8.358                   | Yes |
| C20orf22  | o67h4JQSuEa02CJJIQ | rs2500406  | 16.91            | 16.12                     | -0.327     | 7.89             | 30.41           | 0.3392 | 7.615     | 0.202                             | 7.238      | 7.474      | 7.604      | 7.754   | 8.358                   | Yes |
| C20orf22  | o67h4JQSuEa02CJJIQ | rs4423675  | 21.5             | 20.49                     | -0.403     | 8.4              | 31.32           | 0.465  | 7.615     | 0.202                             | 7.238      | 7.474      | 7.604      | 7.754   | 8.358                   | Yes |
| C20orf30  | iedOPUKNJeJyKHI0U  | rs735204   | 4.54             | 4.34                      | -0.092     | 1.66             | -4.71           | 0.4875 | 12.565    | 0.318                             | 9.279      | 12.445     | 12.594     | 12.706  | 13.144                  |     |
| C20orf30  | iedOPUKNJeJyKHI0U  | rs6053111  | 3.78             | 3.61                      | -0.076     | 0.88             | 1.45            | 0.3675 | 12.565    | 0.318                             | 9.279      | 12.445     | 12.594     | 12.706  | 13.144                  |     |
| C20orf72  | f7V6v6gHwOVPEleqCo | rs910901   | 4.38             | 4.19                      | -0.083     | 2.32             | -16.08          | 0.35   | 9.474     | 0.206                             | 8.809      | 9.325      | 9.49       | 9.613   | 10.086                  |     |
| C20orf72  | f7V6v6gHwOVPEleqCo | rs4519603  | 4.56             | 4.36                      | 0.087      | 2.32             | -2.12           | 0.3467 | 9.474     | 0.206                             | 8.809      | 9.325      | 9.49       | 9.613   | 10.086                  |     |
| C20orf72  | f7V6v6gHwOVPEleqCo | rs6105852  | 6.96             | 6.65                      | 0.136      | 3.27             | 5.39            | 0.485  | 9.474     | 0.206                             | 8.809      | 9.325      | 9.49       | 9.613   | 10.086                  |     |
| C20orf94  | 3XUhn84AMFSpKRJAWk | rs6032908  | 3.5              | 3.36                      | -0.067     | 1.84             | -15.25          | 0.2825 | 7.467     | 0.267                             | 7.118      | 7.25       | 7.404      | 7.664   | 8.361                   |     |
| C20orf94  | 3XUhn84AMFSpKRJAWk | rs1232597  | 3.98             | 3.81                      | -0.077     | 1.12             | 1.6             | 0.3636 | 7.467     | 0.267                             | 7.118      | 7.25       | 7.404      | 7.664   | 8.361                   |     |
| C20orf94  | 3XUhn84AMFSpKRJAWk | rs1051421  | 3.6              | 3.48                      | -0.07      | 1.4              | 16.25           | 0.245  | 7.467     | 0.267                             | 7.118      | 7.25       | 7.404      | 7.664   | 8.361                   |     |
| C21orf56  | oJi9dNBFxoNeCSaVhc | rs2839127  | 3.43             | 3.25                      | 0.071      | 1.49             | -7.52           | 0.175  | 7.726     | 0.325                             | 7.124      | 7.511      | 7.698      | 7.937   | 8.712                   |     |
| C21orf56  | oJi9dNBFxoNeCSaVhc | rs2839133  | 12.41            | 11.84                     | -0.242     | 3.7              | 10.7            | 0.2425 | 7.726     | 0.325                             | 7.124      | 7.511      | 7.698      | 7.937   | 8.712                   |     |
| C21orf56  | oJi9dNBFxoNeCSaVhc | rs12482934 | 5.04             | 4.82                      | -0.101     | 1.77             | 1.03            | 0.0975 | 7.726     | 0.325                             | 7.124      | 7.511      | 7.698      | 7.937   | 8.712                   |     |
| C21orf56  | oJi9dNBFxoNeCSaVhc | rs2839151  | 4.29             | 4.10                      | 0.083      | 0.79             | 28.69           | 0.0925 | 7.726     | 0.325                             | 7.124      | 7.511      | 7.698      | 7.937   | 8.712                   |     |
| C21orf56  | oJi9dNBFxoNeCSaVhc | rs2839155  | 7.14             | 6.82                      | -0.146     | 3.23             | 35.69           | 0.46   | 7.726     | 0.325                             | 7.124      | 7.511      | 7.698      | 7.937   | 8.712                   |     |
| C21orf56  | oJi9dNBFxoNeCSaVhc | rs2280958  | 7.14             | 6.82                      | -0.146     | 3.12             | 37.72           | 0.46   | 7.726     | 0.325                             | 7.124      | 7.511      | 7.698      | 7.937   | 8.712                   |     |
| C21orf56  | oJi9dNBFxoNeCSaVhc | rs2280957  | 7.14             | 6.82                      | -0.146     | 3.12             | 37.97           | 0.46   | 7.726     | 0.325                             | 7.124      | 7.511      | 7.698      | 7.937   | 8.712                   |     |
| C21orf56  | oJi9dNBFxoNeCSaVhc | rs2839159  | 4.23             | 4.05                      | 0.086      | 0.67             | 47.64           | 0.235  | 7.726     | 0.325                             | 7.124      | 7.511      | 7.698      | 7.937   | 8.712                   |     |
| C21orf56  | oJi9dNBFxoNeCSaVhc | rs2839160  | 13.49            | 12.86                     | -0.267     | 4.35             | 47.88           | 0.47   | 7.726     | 0.325                             | 7.124      | 7.511      | 7.698      | 7.937   | 8.712                   |     |
| C21orf57  | BmLTVTSiJlH2SwjY4  | rs2839168  | 8.76             | 8.36                      | 0.174      | 5.35             | -44.65          | 0.415  | 9.187     | 0.402                             | 8.17       | 8.906      | 9.148      | 9.45    | 10.496                  |     |
| C21orf57  | Bki6SSO9SCiCmuehic | rs2839168  | 3.85             | 3.68                      | 0.077      | 4.09             | -44.65          | 0.415  | 8.666     | 0.525                             | 7.751      | 8.309      | 8.548      | 8.997   | 10.436                  |     |
| C21orf57  | Bki6SSO9SCiCmuehic | rs2839178  | 12.42            | 11.85                     | -0.246     | 4.92             | -27.49          | 0.3125 | 8.666     | 0.525                             | 7.751      | 8.309      | 8.548      | 8.997   | 10.436                  |     |
| C21orf57  | BmLTVTSiJlH2SwjY4  | rs2839178  | 10.85            | 10.35                     | -0.207     | 4.24             | -27.49          | 0.3125 | 9.187     | 0.402                             | 8.17       | 8.906      | 9.148      | 9.45    | 10.496                  |     |
| C21orf57  | HhTqu0GP.tV4tZd5ug | rs2839178  | 3.52             | 3.37                      | -0.067     | 1.69             | -27.49          | 0.3125 | 7.166     | 0.056                             | 7.101      | 7.125      | 7.15       | 7.189   | 7.48                    |     |
| C21orf57  | BmLTVTSiJlH2SwjY4  | rs2839179  | 7.31             | 6.98                      | -0.147     | 3.43             | -25.23          | 0.23   | 9.187     | 0.402                             | 8.17       | 8.906      | 9.148      | 9.45    | 10.496                  |     |
| C21orf57  | Bki6SSO9SCiCmuehic | rs2839179  | 3.93             | 3.76                      | -0.08      | 3.86             | -25.23          | 0.23   | 8.666     | 0.525                             | 7.751      | 8.309      | 8.548      | 8.997   | 10.436                  |     |
| C21orf57  | BmLTVTSiJlH2SwjY4  | rs2839182  | 23.15            | 22.05                     | -0.404     | 6.36             | -20.11          | 0.16   | 9.187     | 0.402                             | 8.17       | 8.906      | 9.148      | 9.45    | 10.496                  |     |
| C21orf57  | Bki6SSO9SCiCmuehic | rs2839182  | 19.48            | 18.57                     | -0.368     | 6.17             | -20.11          | 0.16   | 8.666     | 0.525                             | 7.751      | 8.309      | 8.548      | 8.997   | 10.436                  |     |
| C21orf57  | HhTqu0GP.tV4tZd5ug | rs2839186  | 5.48             | 5.24                      | -0.111     | 1.23             | -16.2           | 0.44   | 7.166     | 0.056                             | 7.101      | 7.125      | 7.15       | 7.189   | 7.48                    |     |
| C21orf57  | Bki6SSO9SCiCmuehic | rs2839186  | 3.53             | 3.38                      | -0.069     | 0.72             | -16.2           | 0.44   | 8.666     | 0.525                             | 7.751      | 8.309      | 8.548      | 8.997   | 10.436                  |     |
| C21orf57  | Bki6SSO9SCiCmuehic | rs2839188  | 4.07             | 3.90                      | -0.079     | 0.51             | -13.47          | 0.36   | 8.666     | 0.525                             | 7.751      | 8.309      | 8.548      | 8.997   | 10.436                  |     |
| C21orf57  | HhTqu0GP.tV4tZd5ug | rs2839188  | 3.84             | 3.67                      | -0.073     | 0.53             | -13.47          | 0.36   | 7.166     | 0.056                             | 7.101      | 7.125      | 7.15       | 7.189   | 7.48                    |     |
| C21orf57  | BmLTVTSiJlH2SwjY4  | rs2839193  | 8.48             | 8.09                      | 0.168      | 3.87             | -7.92           | 0.2725 | 9.187     | 0.402                             | 8.17       | 8.906      | 9.148      | 9.45    | 10.496                  |     |
| C21orf57  | Bki6SSO9SCiCmuehic | rs2839193  | 3.8              | 3.64                      | 0.075      | 4.06             | -7.92           | 0.2725 | 8.666     | 0.525                             | 7.751      | 8.309      | 8.548      | 8.997   | 10.436                  |     |
| C21orf57  | HhTqu0GP.tV4tZd5ug | rs4438580  | 3.7              | 3.54                      | 0.071      | 0.93             | -5.77           | 0.0905 | 7.166     | 0.056                             | 7.101      | 7.125      | 7.15       | 7.189   | 7.48                    |     |
| C21orf57  | BmLTVTSiJlH2SwjY4  | rs914249   | 19.91            | 18.97                     | 0.362      | 6.61             | 1.27            | 0.3241 | 9.187     | 0.402                             | 8.17       | 8.906      | 9.148      | 9.45    | 10.496                  |     |
| C21orf57  | Bki6SSO9SCiCmuehic | rs914249   | 19.32            | 18.41                     | 0.368      | 5.32             | 1.27            | 0.3241 | 8.666     | 0.525                             | 7.751      | 8.309      | 8.548      | 8.997   | 10.436                  |     |
| C21orf57  | HhTqu0GP.tV4tZd5ug | rs914249   | 4.64             | 4.44                      | 0.092      | 0.99             | 6.82            | 0.3241 | 7.166     | 0.056                             | 7.101      | 7.125      | 7.15       | 7.189   | 7.48                    |     |
| C21orf57  | BmLTVTSiJlH2SwjY4  | rs11701361 | 4.22             | 4.04                      | -0.077     | 2.2              | 46.81           | 0.2325 | 9.187     | 0.402                             | 8.17       | 8.906      | 9.148      | 9.45    | 10.496                  |     |
| C21orf7   | ouF0SwE3eX_Xu7veqg | rs2832236  | 3.51             | 3.36                      | 0.065      | 0.71             | -0.6            | 0.4625 | 9.557     | 1.026                             | 8.07       | 8.752      | 9.192      | 10.283  | 13.38                   |     |
| C22orf9   | HdnkkTnm5TJoomaW3w | rs132829   | 3.82             | 3.66                      | 0.073      | 1.7              | -37.05          | 0.1325 | 7.119     | 0.032                             | 7.092      | 7.104      | 7.11       | 7.124   | 7.406                   |     |
| C22orf9   | xiX8tVnegpSkvyuwMo | rs132829   | 3.61             | 3.51                      | 0.065      | 1.36             | -37.05          | 0.1325 | 7.768     | 0.287                             | 7.335      | 7.555      | 7.696      | 7.942   | 8.797                   |     |
| C2orf15   | KgqHpEo3f3qAl_r0us | rs11692699 | 19.08            | 18.18                     | 0.342      | 3.21             | -27.53          | 0.3325 | 7.893     | 0.227                             | 7.108      | 7.747      | 7.892      | 8.031   | 8.477                   |     |
| C2orf15   | KgqHpEo3f3qAl_r0us | rs6717729  | 17.85            | 17.01                     | 0.323      | 3.07             | -1.24           | 0.3266 | 7.893     | 0.227                             | 7.108      | 7.747      | 7.892      | 8.031   | 8.477                   |     |
| C2orf15   | KgqHpEo3f3qAl_r0us | rs2516835  | 20.17            | 19.23                     | 0.357      | 3.24             | 11.18           | 0.3543 | 7.893     | 0.227                             | 7.108      | 7.747      | 7.892      | 8.031   | 8.477                   |     |
| C2orf26   | ocv.0ZeQ36Lcr5ft3U | rs7590230  | 3.98             | 3.83                      | 0.077      | 1.06             | -18.82          | 0.2325 | 7.685     | 0.305                             | 7.145      | 7.46       | 7.628      | 7.876   | 8.671                   |     |
| C2orf27   | EUE53Dn0j0Ln.1Hv1U | rs7585022  | 4.28             | 4.10                      | -0.084     | 3.59             | 17.15           | 0.2125 | 7.179     | 0.068                             | 7.103      | 7.138      | 7.159      | 7.205   | 7.787                   |     |
| C2orf27   | EUE53Dn0j0Ln.1Hv1U | rs13033319 | 3.95             | 3.78                      | -0.077     | 3.16             | 35.29           | 0.2161 | 7.179     | 0.068                             | 7.103      | 7.138      | 7.159      | 7.205   | 7.787                   |     |
| C2orf43   | xqAJQnUhCi57yVCqCl | rs3072     | 4.4              | 4.21                      | 0.085      | 1.62             | -6.41           | 0.365  | 8.275     | 0.172                             | 7.759      | 8.174      | 8.281      | 8.383   | 8.782                   |     |
| C2orf43   | xqAJQnUhCi57yVCqCl | rs7255     | 3.94             | 3.77                      | -0.076     | 1.33             | -6              | 0.435  | 8.275     | 0.172                             | 7.759      | 8.174      | 8.281      | 8.383   | 8.782                   |     |
| C2orf43   | xqAJQnUhCi57yVCqCl | rs13385191 | 12.26            | 11.69                     | -0.24      | 3.59             | 3.45            | 0.201  | 8.275     | 0.172                             | 7.759      | 8.174      | 8.281      | 8.383   | 8.782                   |     |
| C2orf43   | xqAJQnUhCi57yVCqCl | rs340596   | 7.57             | 7.23                      | 0.152      | 1.6              | 4.94            | 0.4697 | 8.275     | 0.172                             | 7.759      | 8.174      | 8.281      | 8.383   | 8.782                   |     |
| C2orf43   | xqAJQnUhCi57yVCqCl | rs340620   | 5.12             | 4.90                      | -0.099     | 1.24             | 39.29           | 0.3625 | 8.275     | 0.172                             | 7.759      | 8.174      | 8.281      | 8.383   | 8.782                   |     |
| C2orf43   | xqAJQnUhCi57yVCqCl | rs564125   | 4.55             | 4.36                      | -0.089     | 1.48             | 51.7            | 0.4475 | 8.275     | 0.172                             | 7.759      | 8.174      | 8.281      | 8.383   | 8.782                   |     |
| C2orf43   | xqAJQnUhCi57yVCqCl | rs653347   | 4.55             | 4.36                      | -0.089     | 1.48             | 54.89           | 0.4475 | 8.275     | 0.172                             | 7.759      | 8.174      | 8.281      | 8.383   | 8.782                   |     |

| Symbol  | Lumi nuID          | SNP        | Population-based association |                  | % Variance Explained | Family-based association |                               | Transcript abundance (log2 scale) |        |                    |         |                 |        |                 | SNP mapping under probe |         |
|---------|--------------------|------------|------------------------------|------------------|----------------------|--------------------------|-------------------------------|-----------------------------------|--------|--------------------|---------|-----------------|--------|-----------------|-------------------------|---------|
|         |                    |            | p-value (-log10)             | p-value (-log10) |                      | p-value (-log10)         | Distance from transcript (kb) | MAF                               | Mean   | Standard Deviation | Minimum | 25th percentile | Median | 75th percentile |                         | Maximum |
| C2orf43 | xqAJQnUhCi57yVCqCl | rs514459   | 5.99                         | 5.73             | -0.118               | 1.14                     | -37.3                         | 0.2325                            | 8.275  | 0.172              | 7.759   | 8.174           | 8.281  | 8.383           | 8.782                   |         |
| C2orf63 | Q3wUnion7EEZxs56_o | rs1444262  | 4.14                         | 3.96             | -0.078               | 1.15                     | -48.27                        | 0.3575                            | 7.679  | 0.299              | 7.181   | 7.474           | 7.615  | 7.828           | 9.059                   |         |
| C2orf63 | Q3wUnion7EEZxs56_o | rs4672025  | 3.86                         | 3.69             | -0.074               | 0.73                     | -18.56                        | 0.305                             | 7.679  | 0.299              | 7.181   | 7.474           | 7.615  | 7.828           | 9.059                   |         |
| C2orf63 | Q3wUnion7EEZxs56_o | rs7349405  | 15.76                        | 15.03            | -0.3                 | 4.81                     | -11.49                        | 0.1275                            | 7.679  | 0.299              | 7.181   | 7.474           | 7.615  | 7.828           | 9.059                   |         |
| C2orf63 | Q3wUnion7EEZxs56_o | rs3935223  | 4.61                         | 4.41             | 0.088                | 0.57                     | -10.07                        | 0.4698                            | 7.679  | 0.299              | 7.181   | 7.474           | 7.615  | 7.828           | 9.059                   |         |
| C2orf63 | Q3wUnion7EEZxs56_o | rs6759911  | 4.62                         | 4.42             | -0.088               | 0.72                     | -8.82                         | 0.4875                            | 7.679  | 0.299              | 7.181   | 7.474           | 7.615  | 7.828           | 9.059                   |         |
| C2orf63 | Q3wUnion7EEZxs56_o | rs4435493  | 13                           | 12.40            | -0.247               | 3.7                      | -10.13                        | 0.22                              | 7.679  | 0.299              | 7.181   | 7.474           | 7.615  | 7.828           | 9.059                   |         |
| C2orf63 | Q3wUnion7EEZxs56_o | rs2589094  | 5.63                         | 5.38             | -0.11                | 1.32                     | 23.57                         | 0.245                             | 7.679  | 0.299              | 7.181   | 7.474           | 7.615  | 7.828           | 9.059                   |         |
| C2orf63 | Q3wUnion7EEZxs56_o | rs1056445  | 5.29                         | 5.06             | -0.103               | 1.2                      | 31.37                         | 0.25                              | 7.679  | 0.299              | 7.181   | 7.474           | 7.615  | 7.828           | 9.059                   |         |
| C3AR1   | og2g3eqvqFSQqR8EBU | rs11057065 | 3.92                         | 3.76             | 0.076                | 1.02                     | -2.67                         | 0.3175                            | 7.739  | 0.341              | 7.257   | 7.495           | 7.644  | 7.887           | 9.096                   |         |
| C3orf10 | xlyunxSVC1U7_h.SeE | rs3774208  | 7.04                         | 6.72             | 0.138                | 3.6                      | -4.15                         | 0.085                             | 10.623 | 0.297              | 9.707   | 10.427          | 10.617 | 10.826          | 11.348                  |         |
| C3orf15 | TeCpSOsHE8q.mreOtk | rs7617287  | 7.38                         | 7.05             | -0.156               | 2.52                     | -3.34                         | 0.1338                            | 7.166  | 0.042              | 7.1     | 7.137           | 7.158  | 7.189           | 7.334                   |         |
| C3orf15 | TeCpSOsHE8q.mreOtk | rs10934496 | 4.7                          | 4.50             | -0.095               | 1.13                     | 11.43                         | 0.1784                            | 7.166  | 0.042              | 7.1     | 7.137           | 7.158  | 7.189           | 7.334                   |         |
| C3orf15 | TeCpSOsHE8q.mreOtk | rs6778570  | 4.71                         | 4.50             | -0.094               | 1.18                     | 16.73                         | 0.1775                            | 7.166  | 0.042              | 7.1     | 7.137           | 7.158  | 7.189           | 7.334                   |         |
| C3orf31 | TnTjVh7ojuuYcpeCC0 | rs440746   | 8.52                         | 8.40             | -0.172               | 4.77                     | 0.2                           | 0.4625                            | 9.585  | 0.308              | 8.012   | 9.412           | 9.607  | 9.789           | 10.219                  |         |
| C3orf31 | TnTjVh7ojuuYcpeCC0 | rs430373   | 7.09                         | 6.77             | 0.143                | 4                        | 1.01                          | 0.465                             | 9.585  | 0.308              | 8.012   | 9.412           | 9.607  | 9.789           | 10.219                  |         |
| C3orf31 | TnTjVh7ojuuYcpeCC0 | rs303850   | 7.76                         | 7.41             | -0.156               | 3.72                     | 8                             | 0.4225                            | 9.585  | 0.308              | 8.012   | 9.412           | 9.607  | 9.789           | 10.219                  |         |
| C3orf52 | NDiV6vAtLuCpJ7uakY | rs10511304 | 3.8                          | 3.64             | 0.07                 | 1.21                     | -11.28                        | 0.1875                            | 7.272  | 0.084              | 7.118   | 7.216           | 7.262  | 7.311           | 7.792                   |         |
| C4BPB   | iUt5C_NSGnVAU7iCK  | rs6690037  | 3.96                         | 3.79             | 0.076                | 3.47                     | 1.25                          | 0.5                               | 7.395  | 0.168              | 7.119   | 7.279           | 7.374  | 7.475           | 8.493                   | Yes     |
| C4orf14 | Hk3WkcxF4KBL.hbWU  | rs1625691  | 4.36                         | 4.17             | 0.082                | 5.54                     | 1.91                          | 0.2825                            | 10.558 | 0.186              | 10.048  | 10.418          | 10.56  | 10.701          | 10.972                  |         |
| C4orf32 | N_qS0pP7N.rkKELAE4 | rs10004030 | 5.2                          | 4.97             | -0.103               | 2.43                     | -47.51                        | 0.2625                            | 8.318  | 0.405              | 7.514   | 8.04            | 8.268  | 8.51            | 9.529                   |         |
| C4orf32 | N_qS0pP7N.rkKELAE4 | rs1968489  | 4.44                         | 4.24             | 0.086                | 2.41                     | -32.17                        | 0.2475                            | 8.318  | 0.405              | 7.514   | 8.04            | 8.268  | 8.51            | 9.529                   |         |
| C4orf32 | N_qS0pP7N.rkKELAE4 | rs6836984  | 4.72                         | 4.52             | -0.093               | 1.9                      | -26.85                        | 0.3858                            | 8.318  | 0.405              | 7.514   | 8.04            | 8.268  | 8.51            | 9.529                   |         |
| C4orf32 | N_qS0pP7N.rkKELAE4 | rs12500953 | 4.85                         | 4.63             | -0.094               | 2.05                     | -24.26                        | 0.3875                            | 8.318  | 0.405              | 7.514   | 8.04            | 8.268  | 8.51            | 9.529                   |         |
| C4orf32 | N_qS0pP7N.rkKELAE4 | rs7682303  | 4.85                         | 4.63             | 0.094                | 2.09                     | -23.74                        | 0.3875                            | 8.318  | 0.405              | 7.514   | 8.04            | 8.268  | 8.51            | 9.529                   |         |
| C4orf32 | N_qS0pP7N.rkKELAE4 | rs1521477  | 3.54                         | 3.39             | -0.068               | 1.53                     | -16.38                        | 0.4641                            | 8.318  | 0.405              | 7.514   | 8.04            | 8.268  | 8.51            | 9.529                   |         |
| C4orf32 | N_qS0pP7N.rkKELAE4 | rs4833392  | 4.83                         | 4.62             | -0.096               | 1.97                     | -8.28                         | 0.285                             | 8.318  | 0.405              | 7.514   | 8.04            | 8.268  | 8.51            | 9.529                   |         |
| C4orf32 | N_qS0pP7N.rkKELAE4 | rs1436136  | 3.91                         | 3.75             | -0.074               | 1.73                     | -3.15                         | 0.465                             | 8.318  | 0.405              | 7.514   | 8.04            | 8.268  | 8.51            | 9.529                   |         |
| C4orf32 | N_qS0pP7N.rkKELAE4 | rs4834244  | 3.31                         | 3.17             | -0.062               | 1.78                     | 40.33                         | 0.49                              | 8.318  | 0.405              | 7.514   | 8.04            | 8.268  | 8.51            | 9.529                   |         |
| C4orf33 | r44yMUGS6efluKkqD0 | rs4975193  | 10.18                        | 9.71             | -0.205               | 5.25                     | -34.28                        | 0.198                             | 8.277  | 0.343              | 7.162   | 8.038           | 8.262  | 8.504           | 9.4                     |         |
| C4orf33 | r44yMUGS6efluKkqD0 | rs2592948  | 5.36                         | 5.12             | 0.108                | 3.52                     | -20.22                        | 0.3425                            | 8.277  | 0.343              | 7.162   | 8.038           | 8.262  | 8.504           | 9.4                     |         |
| C4orf33 | r44yMUGS6efluKkqD0 | rs1757936  | 6.25                         | 5.97             | 0.129                | 4.34                     | -3.02                         | 0.25                              | 8.277  | 0.343              | 7.162   | 8.038           | 8.262  | 8.504           | 9.4                     |         |
| C4orf33 | r44yMUGS6efluKkqD0 | rs10518544 | 4.75                         | 4.55             | 0.091                | 1.33                     | -4.64                         | 0.105                             | 8.277  | 0.343              | 7.162   | 8.038           | 8.262  | 8.504           | 9.4                     |         |
| C4orf33 | r44yMUGS6efluKkqD0 | rs337277   | 9.83                         | 9.39             | -0.196               | 5.28                     | -3.19                         | 0.1975                            | 8.277  | 0.343              | 7.162   | 8.038           | 8.262  | 8.504           | 9.4                     |         |
| C4orf33 | r44yMUGS6efluKkqD0 | rs1699387  | 9.83                         | 9.39             | 0.196                | 5.28                     | -2.35                         | 0.1975                            | 8.277  | 0.343              | 7.162   | 8.038           | 8.262  | 8.504           | 9.4                     |         |
| C4orf33 | r44yMUGS6efluKkqD0 | rs17014243 | 4.13                         | 3.95             | 0.082                | 4.19                     | 23.92                         | 0.0905                            | 8.277  | 0.343              | 7.162   | 8.038           | 8.262  | 8.504           | 9.4                     |         |
| C4orf33 | r44yMUGS6efluKkqD0 | rs4513585  | 3.4                          | 3.26             | 0.066                | 1.57                     | 38.74                         | 0.4171                            | 8.277  | 0.343              | 7.162   | 8.038           | 8.262  | 8.504           | 9.4                     |         |
| C4orf33 | r44yMUGS6efluKkqD0 | rs4616770  | 3.52                         | 3.37             | -0.067               | 1.65                     | 38.81                         | 0.315                             | 8.277  | 0.343              | 7.162   | 8.038           | 8.262  | 8.504           | 9.4                     |         |
| C5      | BoEXXQFxr0oO.nqlgl | rs7037673  | 6.51                         | 6.22             | 0.123                | 2.14                     | 25.87                         | 0.4026                            | 7.949  | 0.207              | 7.503   | 7.826           | 7.931  | 8.048           | 9.118                   |         |
| C5      | BoEXXQFxr0oO.nqlgl | rs4837805  | 4                            | 3.83             | -0.072               | 0.25                     | 31.64                         | 0.395                             | 7.949  | 0.207              | 7.503   | 7.826           | 7.931  | 8.048           | 9.118                   |         |
| C5      | BoEXXQFxr0oO.nqlgl | rs10818495 | 5.34                         | 5.10             | 0.1                  | 0.98                     | 42.57                         | 0.475                             | 7.949  | 0.207              | 7.503   | 7.826           | 7.931  | 8.048           | 9.118                   |         |
| C5      | BoEXXQFxr0oO.nqlgl | rs7040319  | 5.34                         | 5.10             | -0.1                 | 0.98                     | 44.64                         | 0.475                             | 7.949  | 0.207              | 7.503   | 7.826           | 7.931  | 8.048           | 9.118                   |         |
| C5      | BoEXXQFxr0oO.nqlgl | rs2300932  | 4.57                         | 4.37             | 0.083                | 0.62                     | -42.12                        | 0.4075                            | 7.949  | 0.207              | 7.503   | 7.826           | 7.931  | 8.048           | 9.118                   |         |
| C5      | BoEXXQFxr0oO.nqlgl | rs10116271 | 6.86                         | 6.55             | 0.129                | 1.52                     | -34.41                        | 0.495                             | 7.949  | 0.207              | 7.503   | 7.826           | 7.931  | 8.048           | 9.118                   |         |
| C5      | BoEXXQFxr0oO.nqlgl | rs993247   | 8.27                         | 7.97             | 0.158                | 2.22                     | -27.3                         | 0.4146                            | 7.949  | 0.207              | 7.503   | 7.826           | 7.931  | 8.048           | 9.118                   |         |
| C5      | BoEXXQFxr0oO.nqlgl | rs10818500 | 3.62                         | 3.40             | 0.067                | 0.84                     | -1.67                         | 0.4362                            | 7.949  | 0.207              | 7.503   | 7.826           | 7.931  | 8.048           | 9.118                   |         |
| C5      | BoEXXQFxr0oO.nqlgl | rs10818504 | 8.05                         | 7.68             | 0.154                | 2.43                     | 48.13                         | 0.405                             | 7.949  | 0.207              | 7.503   | 7.826           | 7.931  | 8.048           | 9.118                   |         |
| C5orf21 | ckUJz5.on9zKxyU1by | rs2119449  | 3.74                         | 3.58             | -0.073               | 0.78                     | 161.9                         | 0.0761                            | 9.457  | 0.326              | 7.236   | 9.298           | 9.508  | 9.667           | 9.975                   |         |
| C5orf34 | fkoh4VlctUil5UdPbQ | rs6895327  | 3.96                         | 3.79             | 0.08                 | 1.06                     | 11.1                          | 0.46                              | 7.35   | 0.101              | 7.128   | 7.292           | 7.34   | 7.408           | 7.704                   |         |
| C5orf35 | TIR9ju_9_2R8qEONCg | rs832573   | 18.19                        | 17.34            | -0.357               | 5.05                     | -45.52                        | 0.2321                            | 7.837  | 0.278              | 7.107   | 7.642           | 7.874  | 8.005           | 8.991                   |         |
| C5orf35 | TIR9ju_9_2R8qEONCg | rs832574   | 7.56                         | 7.22             | -0.154               | 4.33                     | -45.22                        | 0.4075                            | 7.837  | 0.278              | 7.107   | 7.642           | 7.874  | 8.005           | 8.991                   |         |
| C5orf35 | TIR9ju_9_2R8qEONCg | rs832575   | 15.22                        | 14.51            | -0.304               | 4.75                     | -43.31                        | 0.13                              | 7.837  | 0.278              | 7.107   | 7.642           | 7.874  | 8.005           | 8.991                   |         |
| C5orf35 | TIR9ju_9_2R8qEONCg | rs832577   | 22.76                        | 21.69            | -0.417               | 5.36                     | -41.31                        | 0.295                             | 7.837  | 0.278              | 7.107   | 7.642           | 7.874  | 8.005           | 8.991                   |         |
| C5orf35 | TIR9ju_9_2R8qEONCg | rs832581   | 7.56                         | 7.22             | 0.154                | 4.33                     | -30.65                        | 0.4075                            | 7.837  | 0.278              | 7.107   | 7.642           | 7.874  | 8.005           | 8.991                   |         |
| C5orf35 | TIR9ju_9_2R8qEONCg | rs702689   | 18.91                        | 18.02            | -0.361               | 5.28                     | -27.66                        | 0.2325                            | 7.837  | 0.278              | 7.107   | 7.642           | 7.874  | 8.005           | 8.991                   |         |
| C5orf35 | TIR9ju_9_2R8qEONCg | rs832582   | 25.92                        | 24.69            | -0.461               | 5.34                     | -27.36                        | 0.1675                            | 7.837  | 0.278              | 7.107   | 7.642           | 7.874  | 8.005           | 8.991                   |         |
| C5orf35 | TIR9ju_9_2R8qEONCg | rs832540   | 21.59                        | 20.57            | -0.402               | 5.81                     | -5.9                          | 0.2925                            | 7.837  | 0.278              | 7.107   | 7.642           | 7.874  | 8.005           | 8.991                   |         |
| C5orf35 | TIR9ju_9_2R8qEONCg | rs33320    | 21.17                        | 20.18            | 0.395                | 5.65                     | 1.43                          | 0.225                             | 7.837  | 0.278              | 7.107   | 7.642           | 7.874  | 8.005           | 8.991                   |         |
| C5orf35 | TIR9ju_9_2R8qEONCg | rs40497    | 7.58                         | 7.24             | 0.154                | 4.19                     | -3.27                         | 0.3875                            | 7.837  | 0.278              | 7.107   | 7.642           | 7.874  | 8.005           | 8.991                   |         |
| C5orf35 | TIR9ju_9_2R8qEONCg | rs252890   | 24.38                        | 23.23            | -0.442               | 6.55                     | 13.4                          | 0.3025                            | 7.837  | 0.278              | 7.107   | 7.642           | 7.874  | 8.005           | 8.991                   |         |
| C5orf35 | TIR9ju_9_2R8qEONCg | rs2591961  | 30.72                        | 29.26            | -0.526               | 5.73                     | 25.59                         | 0.23                              | 7.837  | 0.278              | 7.107   | 7.642           | 7.874  | 8.005           | 8.991                   |         |
| C5orf35 | TIR9ju_9_2R8qEONCg | rs2662027  | 20.4                         | 19.44            | -0.384               | 5.71                     | 41.48                         | 0.11                              | 7.837  | 0.278              | 7.107   | 7.642           | 7.874  | 8.005           | 8.991                   |         |



| Symbol   | Lumi nuID          | SNP        | Population-based association |                           | % Variance Explained | Family-based association |                               | Transcript abundance (log2 scale) |        |                    |                 |        |                 |         | SNP mapping under probe |
|----------|--------------------|------------|------------------------------|---------------------------|----------------------|--------------------------|-------------------------------|-----------------------------------|--------|--------------------|-----------------|--------|-----------------|---------|-------------------------|
|          |                    |            | p-value (-log10)             | p-value (-log10), GC adj. |                      | p-value (-log10)         | Distance from transcript (kb) | MAF                               | Mean   | Standard Deviation | 25th percentile | Median | 75th percentile | Maximum |                         |
| C5orf35  | TIR9ju_9_2R8qEONCg | rs2662024  | 23.98                        | 22.85                     | 0.437                | 7.25                     | 44.51                         | 0.3075                            | 7.837  | 0.278              | 7.107           | 7.642  | 7.874           | 8.005   | 8.991                   |
| C5orf48  | iSg7g3gkUlU6jUx6U  | rs11958842 | 3.9                          | 3.73                      | -0.079               | 1.74                     | -4.36                         | 0.0578                            | 7.143  | 0.024              | 7.097           | 7.126  | 7.139           | 7.155   | 7.23                    |
| C6orf105 | EHqA3v3feJCT0qSswE | rs932345   | 3.32                         | 3.18                      | 0.062                | 0.59                     | 20.95                         | 0.4375                            | 9.658  | 0.711              | 7.146           | 9.207  | 9.627           | 10.205  | 11.212                  |
| C6orf129 | TGdtzlx6FO4i6R9VEE | rs9380673  | 9.1                          | 8.68                      | -0.18                | 2.65                     | -35.58                        | 0.495                             | 9.863  | 0.441              | 8.468           | 9.539  | 9.874           | 10.133  | 10.902                  |
| C6orf129 | TGdtzlx6FO4i6R9VEE | rs1224127  | 11.99                        | 11.44                     | -0.234               | 2.8                      | -33.15                        | 0.3325                            | 9.863  | 0.441              | 8.468           | 9.539  | 9.874           | 10.133  | 10.902                  |
| C6orf129 | TGdtzlx6FO4i6R9VEE | rs2270687  | 9.08                         | 8.67                      | 0.18                 | 2.63                     | -32.45                        | 0.495                             | 9.863  | 0.441              | 8.468           | 9.539  | 9.874           | 10.133  | 10.902                  |
| C6orf129 | TGdtzlx6FO4i6R9VEE | rs2776906  | 11.99                        | 11.44                     | -0.234               | 2.81                     | -18.95                        | 0.3325                            | 9.863  | 0.441              | 8.468           | 9.539  | 9.874           | 10.133  | 10.902                  |
| C6orf129 | TGdtzlx6FO4i6R9VEE | rs904251   | 11.07                        | 10.56                     | 0.215                | 3.44                     | 0.99                          | 0.3575                            | 9.863  | 0.441              | 8.468           | 9.539  | 9.874           | 10.133  | 10.902                  |
| C6orf129 | TGdtzlx6FO4i6R9VEE | rs756202   | 11.81                        | 11.26                     | -0.231               | 2.88                     | -7.35                         | 0.3342                            | 9.863  | 0.441              | 8.468           | 9.539  | 9.874           | 10.133  | 10.902                  |
| C6orf129 | TGdtzlx6FO4i6R9VEE | rs2797793  | 8.95                         | 8.54                      | -0.179               | 3.03                     | 9.56                          | 0.4125                            | 9.863  | 0.441              | 8.468           | 9.539  | 9.874           | 10.133  | 10.902                  |
| C6orf129 | TGdtzlx6FO4i6R9VEE | rs1757188  | 9.24                         | 8.82                      | 0.182                | 2.36                     | 16.11                         | 0.49                              | 9.863  | 0.441              | 8.468           | 9.539  | 9.874           | 10.133  | 10.902                  |
| C6orf129 | TGdtzlx6FO4i6R9VEE | rs1757171  | 12.06                        | 11.50                     | -0.233               | 3.71                     | 19.35                         | 0.3375                            | 9.863  | 0.441              | 8.468           | 9.539  | 9.874           | 10.133  | 10.902                  |
| C6orf129 | TGdtzlx6FO4i6R9VEE | rs11754662 | 4.44                         | 4.25                      | -0.084               | 2.66                     | 24.64                         | 0.3175                            | 9.863  | 0.441              | 8.468           | 9.539  | 9.874           | 10.133  | 10.902                  |
| C6orf129 | TGdtzlx6FO4i6R9VEE | rs1541227  | 4.48                         | 4.28                      | 0.087                | 1.11                     | 34.17                         | 0.2                               | 9.863  | 0.441              | 8.468           | 9.539  | 9.874           | 10.133  | 10.902                  |
| C6orf129 | TGdtzlx6FO4i6R9VEE | rs2797780  | 5.09                         | 4.87                      | -0.102               | 1.38                     | 38.72                         | 0.275                             | 9.863  | 0.441              | 8.468           | 9.539  | 9.874           | 10.133  | 10.902                  |
| C6orf129 | TGdtzlx6FO4i6R9VEE | rs2776882  | 4.74                         | 4.54                      | -0.094               | 2.01                     | 40.38                         | 0.2725                            | 9.863  | 0.441              | 8.468           | 9.539  | 9.874           | 10.133  | 10.902                  |
| C6orf129 | TGdtzlx6FO4i6R9VEE | rs12211948 | 7.78                         | 7.43                      | -0.154               | 1.98                     | 42.5                          | 0.4598                            | 9.863  | 0.441              | 8.468           | 9.539  | 9.874           | 10.133  | 10.902                  |
| C6orf129 | TGdtzlx6FO4i6R9VEE | rs2797777  | 4.61                         | 4.41                      | 0.09                 | 2.21                     | 43.23                         | 0.27                              | 9.863  | 0.441              | 8.468           | 9.539  | 9.874           | 10.133  | 10.902                  |
| C6orf148 | f1XqC6o4iiC36fR.64 | rs6453659  | 5.78                         | 5.53                      | -0.116               | 1.45                     | -20.93                        | 0.245                             | 7.15   | 0.032              | 7.101           | 7.13   | 7.143           | 7.164   | 7.343                   |
| C6orf148 | f1XqC6o4iiC36fR.64 | rs10943084 | 5.54                         | 5.29                      | 0.111                | 1                        | -3.2                          | 0.105                             | 7.15   | 0.032              | 7.101           | 7.13   | 7.143           | 7.164   | 7.343                   |
| C6orf148 | f1XqC6o4iiC36fR.64 | rs4708042  | 6.24                         | 5.96                      | -0.126               | 2.87                     | 2.48                          | 0.2425                            | 7.15   | 0.032              | 7.101           | 7.13   | 7.143           | 7.164   | 7.343                   |
| C6orf148 | f1XqC6o4iiC36fR.64 | rs10943088 | 5.82                         | 5.56                      | -0.117               | 1.12                     | 11.8                          | 0.1106                            | 7.15   | 0.032              | 7.101           | 7.13   | 7.143           | 7.164   | 7.343                   |
| C6orf148 | f1XqC6o4iiC36fR.64 | rs2168113  | 5.19                         | 4.96                      | 0.104                | 2.31                     | 24.86                         | 0.1825                            | 7.15   | 0.032              | 7.101           | 7.13   | 7.143           | 7.164   | 7.343                   |
| C6orf148 | f1XqC6o4iiC36fR.64 | rs555779   | 4.78                         | 4.57                      | -0.095               | 1.72                     | 41.55                         | 0.185                             | 7.15   | 0.032              | 7.101           | 7.13   | 7.143           | 7.164   | 7.343                   |
| C6orf151 | ZiVKkevM9LKAEb0kdI | rs10484325 | 4                            | 3.83                      | 0.08                 | 2.01                     | -33.38                        | 0.1425                            | 7.947  | 0.223              | 7.374           | 7.801  | 7.963           | 8.096   | 8.821                   |
| C6orf151 | ZiVKkevM9LKAEb0kdI | rs2757632  | 3.78                         | 3.62                      | -0.072               | 1.66                     | -28.77                        | 0.4                               | 7.947  | 0.223              | 7.374           | 7.801  | 7.963           | 8.096   | 8.821                   |
| C6orf151 | ZiVKkevM9LKAEb0kdI | rs11755954 | 5.04                         | 4.82                      | -0.103               | 2.39                     | -21.11                        | 0.1407                            | 7.947  | 0.223              | 7.374           | 7.801  | 7.963           | 8.096   | 8.821                   |
| C6orf151 | ZiVKkevM9LKAEb0kdI | rs2757592  | 4.38                         | 4.19                      | 0.086                | 1.83                     | -3.24                         | 0.2975                            | 7.947  | 0.223              | 7.374           | 7.801  | 7.963           | 8.096   | 8.821                   |
| C6orf151 | ZiVKkevM9LKAEb0kdI | rs6931192  | 7.48                         | 7.14                      | -0.149               | 3.35                     | -0.25                         | 0.2                               | 7.947  | 0.223              | 7.374           | 7.801  | 7.963           | 8.096   | 8.821                   |
| C6orf151 | ZiVKkevM9LKAEb0kdI | rs6597271  | 21.32                        | 20.31                     | -0.4                 | 4.68                     | 10.04                         | 0.093                             | 7.947  | 0.223              | 7.374           | 7.801  | 7.963           | 8.096   | 8.821                   |
| C6orf151 | ZiVKkevM9LKAEb0kdI | rs17398289 | 11.96                        | 11.41                     | 0.25                 | 3.57                     | -10.76                        | 0.0644                            | 7.947  | 0.223              | 7.374           | 7.801  | 7.963           | 8.096   | 8.821                   |
| C6orf151 | ZiVKkevM9LKAEb0kdI | rs2757599  | 3.45                         | 3.30                      | -0.067               | 2.97                     | 0.07                          | 0.4075                            | 7.947  | 0.223              | 7.374           | 7.801  | 7.963           | 8.096   | 8.821                   |
| C6orf151 | ZiVKkevM9LKAEb0kdI | rs2181111  | 4.73                         | 4.53                      | 0.093                | 0.89                     | 12.74                         | 0.445                             | 7.947  | 0.223              | 7.374           | 7.801  | 7.963           | 8.096   | 8.821                   |
| C6orf162 | iFR6K4gkg6X6_16Rek | rs9450659  | 3.77                         | 3.61                      | -0.071               | 1.43                     | 7.2                           | 0.28                              | 7.849  | 0.18               | 7.426           | 7.727  | 7.826           | 7.948   | 8.37                    |
| C6orf162 | iFR6K4gkg6X6_16Rek | rs12661729 | 4.79                         | 4.58                      | 0.089                | 1.98                     | 36.19                         | 0.101                             | 7.849  | 0.18               | 7.426           | 7.727  | 7.826           | 7.948   | 8.37                    |
| C6orf191 | uk6nm47_K5OL4016dQ | rs4256453  | 3.64                         | 3.49                      | 0.069                | 3.09                     | -46.27                        | 0.4175                            | 7.295  | 0.145              | 7.114           | 7.182  | 7.261           | 7.382   | 7.899                   |
| C6orf191 | uk6nm47_K5OL4016dQ | rs11968591 | 4.17                         | 3.99                      | 0.079                | 3.46                     | -36.16                        | 0.39                              | 7.295  | 0.145              | 7.114           | 7.182  | 7.261           | 7.382   | 7.899                   |
| C6orf191 | uk6nm47_K5OL4016dQ | rs4897345  | 4.12                         | 3.94                      | 0.079                | 3.59                     | -35.1                         | 0.4                               | 7.295  | 0.145              | 7.114           | 7.182  | 7.261           | 7.382   | 7.899                   |
| C6orf191 | uk6nm47_K5OL4016dQ | rs2326871  | 5.71                         | 5.46                      | 0.111                | 3.71                     | -11.35                        | 0.385                             | 7.295  | 0.145              | 7.114           | 7.182  | 7.261           | 7.382   | 7.899                   |
| C6orf191 | uk6nm47_K5OL4016dQ | rs9402178  | 6.37                         | 6.09                      | 0.124                | 3.24                     | -5.13                         | 0.165                             | 7.295  | 0.145              | 7.114           | 7.182  | 7.261           | 7.382   | 7.899                   |
| C6orf191 | uk6nm47_K5OL4016dQ | rs7776426  | 10.33                        | 9.86                      | 0.2                  | 5.39                     | 0.13                          | 0.465                             | 7.295  | 0.145              | 7.114           | 7.182  | 7.261           | 7.382   | 7.899                   |
| C6orf191 | uk6nm47_K5OL4016dQ | rs9492393  | 12.79                        | 12.20                     | 0.248                | 4.95                     | 2.28                          | 0.3575                            | 7.295  | 0.145              | 7.114           | 7.182  | 7.261           | 7.382   | 7.899                   |
| C6orf191 | uk6nm47_K5OL4016dQ | rs9321191  | 9.08                         | 8.67                      | 0.178                | 4.22                     | 13.3                          | 0.225                             | 7.295  | 0.145              | 7.114           | 7.182  | 7.261           | 7.382   | 7.899                   |
| C6orf191 | uk6nm47_K5OL4016dQ | rs1480513  | 9.84                         | 9.39                      | 0.196                | 4.59                     | 13.6                          | 0.4588                            | 7.295  | 0.145              | 7.114           | 7.182  | 7.261           | 7.382   | 7.899                   |
| C6orf191 | uk6nm47_K5OL4016dQ | rs9483068  | 3.63                         | 3.48                      | 0.068                | 2.97                     | -13.71                        | 0.36                              | 7.295  | 0.145              | 7.114           | 7.182  | 7.261           | 7.382   | 7.899                   |
| C6orf191 | uk6nm47_K5OL4016dQ | rs9402186  | 7.03                         | 6.72                      | -0.139               | 4.34                     | -10.75                        | 0.245                             | 7.295  | 0.145              | 7.114           | 7.182  | 7.261           | 7.382   | 7.899                   |
| C6orf191 | uk6nm47_K5OL4016dQ | rs9398926  | 6.61                         | 6.31                      | 0.13                 | 3.69                     | -7.49                         | 0.165                             | 7.295  | 0.145              | 7.114           | 7.182  | 7.261           | 7.382   | 7.899                   |
| C6orf191 | uk6nm47_K5OL4016dQ | rs9321194  | 10.52                        | 10.03                     | 0.207                | 5.41                     | -7.28                         | 0.3                               | 7.295  | 0.145              | 7.114           | 7.182  | 7.261           | 7.382   | 7.899                   |
| C6orf191 | uk6nm47_K5OL4016dQ | rs6939565  | 8.42                         | 8.03                      | 0.167                | 5.15                     | 11.79                         | 0.47                              | 7.295  | 0.145              | 7.114           | 7.182  | 7.261           | 7.382   | 7.899                   |
| C6orf191 | uk6nm47_K5OL4016dQ | rs10499166 | 9.44                         | 9.07                      | -0.183               | 4.94                     | 13.24                         | 0.455                             | 7.295  | 0.145              | 7.114           | 7.182  | 7.261           | 7.382   | 7.899                   |
| C6orf191 | uk6nm47_K5OL4016dQ | rs1337778  | 5.41                         | 5.15                      | -0.107               | 4.26                     | 15.04                         | 0.42                              | 7.295  | 0.145              | 7.114           | 7.182  | 7.261           | 7.382   | 7.899                   |
| C6orf191 | uk6nm47_K5OL4016dQ | rs9375674  | 7.63                         | 7.28                      | 0.155                | 4.68                     | 34.09                         | 0.4725                            | 7.295  | 0.145              | 7.114           | 7.182  | 7.261           | 7.382   | 7.899                   |
| C6orf192 | Wrl7P01ciStJdfvCOY | rs9321367  | 5.79                         | 5.54                      | -0.112               | 1.56                     | -6.15                         | 0.0675                            | 10.023 | 0.311              | 8.709           | 9.838  | 9.989           | 10.196  | 11.578                  |
| C6orf192 | Wrl7P01ciStJdfvCOY | rs1467404  | 5.59                         | 5.35                      | -0.108               | 1.53                     | -0.37                         | 0.105                             | 10.023 | 0.311              | 8.709           | 9.838  | 9.989           | 10.196  | 11.578                  |
| C6orf192 | Wrl7P01ciStJdfvCOY | rs9389032  | 10.61                        | 10.12                     | 0.203                | 2.45                     | 3.18                          | 0.0553                            | 10.023 | 0.311              | 8.709           | 9.838  | 9.989           | 10.196  | 11.578                  |
| C6orf192 | Wrl7P01ciStJdfvCOY | rs9389033  | 10.65                        | 10.16                     | -0.203               | 2.45                     | -13.21                        | 0.055                             | 10.023 | 0.311              | 8.709           | 9.838  | 9.989           | 10.196  | 11.578                  |
| C6orf192 | Wrl7P01ciStJdfvCOY | rs9493446  | 5.59                         | 5.35                      | -0.108               | 1.55                     | 5.9                           | 0.105                             | 10.023 | 0.311              | 8.709           | 9.838  | 9.989           | 10.196  | 11.578                  |
| C6orf192 | Wrl7P01ciStJdfvCOY | rs5006218  | 5.59                         | 5.35                      | 0.108                | 1.51                     | 6.47                          | 0.105                             | 10.023 | 0.311              | 8.709           | 9.838  | 9.989           | 10.196  | 11.578                  |
| C6orf192 | Wrl7P01ciStJdfvCOY | rs12211425 | 10.79                        | 10.30                     | -0.207               | 2.47                     | 12.75                         | 0.0578                            | 10.023 | 0.311              | 8.709           | 9.838  | 9.989           | 10.196  | 11.578                  |
| C6orf224 | ll14kKxTp5SH0rgdAo | rs1054607  | 4.43                         | 4.24                      | 0.081                | 2.36                     | 0.35                          | 0.2864                            | 7.257  | 0.14               | 7.105           | 7.158  | 7.22            | 7.293   | 8.088                   |
| C6orf224 | ll14kKxTp5SH0rgdAo | rs9766863  | 4.68                         | 4.48                      | -0.085               | 2.12                     | 4.34                          | 0.275                             | 7.257  | 0.14               | 7.105           | 7.158  | 7.22            | 7.293   | 8.088                   |
| C6orf224 | ll14kKxTp5SH0rgdAo | rs1321206  | 5.04                         | 4.82                      | 0.092                | 2.26                     | 11.39                         | 0.27                              | 7.257  | 0.14               | 7.105           | 7.158  | 7.22            | 7.293   | 8.088                   |

| Symbol   | Lumi nuID          | SNP        | Population-based association |                  | % Variance Explained | Family-based association |                               | Transcript abundance (log2 scale) |        |                    |         |                 |        |                 | SNP mapping under probe |
|----------|--------------------|------------|------------------------------|------------------|----------------------|--------------------------|-------------------------------|-----------------------------------|--------|--------------------|---------|-----------------|--------|-----------------|-------------------------|
|          |                    |            | p-value (-log10)             | p-value (-log10) |                      | p-value (-log10)         | Distance from transcript (kb) | MAF                               | Mean   | Standard Deviation | Minimum | 25th percentile | Median | 75th percentile |                         |
| C6orf54  | BX3oJ0PNGJE66AG6lo | rs1132306  | 3.64                         | 3.49             | -0.075               | 0.37                     | -49.66                        | 0.3995                            | 7.155  | 0.073              | 7.106   | 7.121           | 7.131  | 7.151           | 7.618                   |
| C6orf54  | BX3oJ0PNGJE66AG6lo | rs9364371  | 6.63                         | 6.33             | 0.138                | 1.39                     | -44.49                        | 0.2096                            | 7.155  | 0.073              | 7.106   | 7.121           | 7.131  | 7.151           | 7.618                   |
| C6orf54  | BX3oJ0PNGJE66AG6lo | rs9346633  | 3.67                         | 3.51             | 0.075                | 0.34                     | -37.35                        | 0.3975                            | 7.155  | 0.073              | 7.106   | 7.121           | 7.131  | 7.151           | 7.618                   |
| C6orf54  | BX3oJ0PNGJE66AG6lo | rs6918659  | 5.62                         | 5.37             | -0.118               | 0.89                     | -11.35                        | 0.2814                            | 7.155  | 0.073              | 7.106   | 7.121           | 7.131  | 7.151           | 7.618                   |
| C6orf54  | BX3oJ0PNGJE66AG6lo | rs6455468  | 9.11                         | 8.70             | 0.19                 | 1.1                      | -8.56                         | 0.1675                            | 7.155  | 0.073              | 7.106   | 7.121           | 7.131  | 7.151           | 7.618                   |
| C6orf54  | BX3oJ0PNGJE66AG6lo | rs9455927  | 5.04                         | 4.82             | -0.103               | 0.4                      | -7.73                         | 0.27                              | 7.155  | 0.073              | 7.106   | 7.121           | 7.131  | 7.151           | 7.618                   |
| C6orf54  | BX3oJ0PNGJE66AG6lo | rs12203032 | 14.37                        | 13.70            | -0.291               | 1.72                     | -1.64                         | 0.1558                            | 7.155  | 0.073              | 7.106   | 7.121           | 7.131  | 7.151           | 7.618                   |
| C6orf54  | BX3oJ0PNGJE66AG6lo | rs2516808  | 4                            | 3.83             | 0.081                | 1.46                     | 7.22                          | 0.4095                            | 7.155  | 0.073              | 7.106   | 7.121           | 7.131  | 7.151           | 7.618                   |
| C6orf54  | BX3oJ0PNGJE66AG6lo | rs1858675  | 4.21                         | 4.03             | 0.089                | 3.08                     | 15.44                         | 0.395                             | 7.155  | 0.073              | 7.106   | 7.121           | 7.131  | 7.151           | 7.618                   |
| C6orf54  | BX3oJ0PNGJE66AG6lo | rs11751451 | 15.18                        | 14.47            | -0.301               | 2.1                      | 15.64                         | 0.15                              | 7.155  | 0.073              | 7.106   | 7.121           | 7.131  | 7.151           | 7.618                   |
| C6orf54  | BX3oJ0PNGJE66AG6lo | rs9364385  | 4.19                         | 4.01             | -0.089               | 3.08                     | 17.61                         | 0.3945                            | 7.155  | 0.073              | 7.106   | 7.121           | 7.131  | 7.151           | 7.618                   |
| C6orf54  | BX3oJ0PNGJE66AG6lo | rs454629   | 4.23                         | 4.04             | 0.089                | 2.24                     | 22.04                         | 0.4125                            | 7.155  | 0.073              | 7.106   | 7.121           | 7.131  | 7.151           | 7.618                   |
| C6orf64  | WX_IPqL_nXsJTWtCQ  | rs9968886  | 3.63                         | 3.48             | 0.07                 | 1.81                     | -11.36                        | 0.15                              | 8.688  | 0.337              | 7.684   | 8.484           | 8.679  | 8.856           | 9.698                   |
| C6orf64  | WX_IPqL_nXsJTWtCQ  | rs6458094  | 5.41                         | 5.17             | -0.112               | 0.94                     | -2.57                         | 0.395                             | 8.688  | 0.337              | 7.684   | 8.484           | 8.679  | 8.856           | 9.698                   |
| C6orf64  | WX_IPqL_nXsJTWtCQ  | rs179271   | 5.81                         | 5.56             | 0.119                | 1.18                     | -3.76                         | 0.405                             | 8.688  | 0.337              | 7.684   | 8.484           | 8.679  | 8.856           | 9.698                   |
| C6orf64  | WX_IPqL_nXsJTWtCQ  | rs228813   | 3.38                         | 3.23             | 0.065                | 1.3                      | 2.84                          | 0.2025                            | 8.688  | 0.337              | 7.684   | 8.484           | 8.679  | 8.856           | 9.698                   |
| C6orf64  | WX_IPqL_nXsJTWtCQ  | rs182767   | 4.21                         | 4.03             | 0.083                | 1.67                     | 8.94                          | 0.2714                            | 8.688  | 0.337              | 7.684   | 8.484           | 8.679  | 8.856           | 9.698                   |
| C6orf85  | rd23IKRRdn9O1bu.4  | rs13219577 | 3.37                         | 3.22             | -0.065               | 2.15                     | -76.26                        | 0.35                              | 7.98   | 0.321              | 7.327   | 7.725           | 7.933  | 8.223           | 8.988                   |
| C6orf85  | rd23IKRRdn9O1bu.4  | rs1079284  | 3.49                         | 3.35             | 0.067                | 2.84                     | -72.67                        | 0.36                              | 7.98   | 0.321              | 7.327   | 7.725           | 7.933  | 8.223           | 8.988                   |
| C7orf13  | u6Cir3EoHplniHqGQU | rs6980337  | 7.24                         | 6.92             | -0.146               | 1.48                     | 1.43                          | 0.3775                            | 7.298  | 0.097              | 7.109   | 7.237           | 7.288  | 7.355           | 7.6                     |
| C7orf13  | u6Cir3EoHplniHqGQU | rs4716437  | 6.69                         | 6.39             | 0.135                | 1.99                     | 8.92                          | 0.2575                            | 7.298  | 0.097              | 7.109   | 7.237           | 7.288  | 7.355           | 7.6                     |
| C7orf13  | u6Cir3EoHplniHqGQU | rs6945589  | 8.4                          | 8.02             | -0.175               | 2.14                     | 23.16                         | 0.3077                            | 7.298  | 0.097              | 7.109   | 7.237           | 7.288  | 7.355           | 7.6                     |
| C7orf13  | u6Cir3EoHplniHqGQU | rs6965850  | 7.08                         | 6.76             | -0.143               | 1.52                     | 23.62                         | 0.375                             | 7.298  | 0.097              | 7.109   | 7.237           | 7.288  | 7.355           | 7.6                     |
| C7orf13  | u6Cir3EoHplniHqGQU | rs2365511  | 4.32                         | 4.13             | 0.087                | 1.72                     | 31                            | 0.4774                            | 7.298  | 0.097              | 7.109   | 7.237           | 7.288  | 7.355           | 7.6                     |
| C7orf13  | u6Cir3EoHplniHqGQU | rs12007    | 6.52                         | 6.23             | 0.131                | 1.95                     | 36.5                          | 0.34                              | 7.298  | 0.097              | 7.109   | 7.237           | 7.288  | 7.355           | 7.6                     |
| C8orf31  | Kobev3nqeV3TqCX8NE | rs11136299 | 4.19                         | 4.01             | 0.082                | 2.43                     | 3.83                          | 0.3819                            | 7.169  | 0.063              | 7.101   | 7.132           | 7.158  | 7.18            | 7.544                   |
| C8orf31  | Kobev3nqeV3TqCX8NE | rs12675829 | 4.19                         | 4.01             | 0.082                | 2.56                     | 10.68                         | 0.445                             | 7.169  | 0.063              | 7.101   | 7.132           | 7.158  | 7.18            | 7.544                   |
| C8orf31  | Kobev3nqeV3TqCX8NE | rs6988480  | 4.37                         | 4.18             | -0.085               | 2.35                     | 35.1                          | 0.3925                            | 7.169  | 0.063              | 7.101   | 7.132           | 7.158  | 7.18            | 7.544                   |
| C8orf32  | TILDb.70JlruiisUIU | rs6999234  | 10.35                        | 9.88             | -0.211               | 3.16                     | 11.21                         | 0.345                             | 8.196  | 0.15               | 7.714   | 8.099           | 8.179  | 8.299           | 8.634                   |
| C8orf32  | TILDb.70JlruiisUIU | rs7014678  | 10.35                        | 9.88             | -0.211               | 3.16                     | -5.52                         | 0.345                             | 8.196  | 0.15               | 7.714   | 8.099           | 8.179  | 8.299           | 8.634                   |
| C8orf32  | TILDb.70JlruiisUIU | rs3824250  | 10.35                        | 9.88             | -0.211               | 2.99                     | -4.79                         | 0.345                             | 8.196  | 0.15               | 7.714   | 8.099           | 8.179  | 8.299           | 8.634                   |
| C8orf32  | TILDb.70JlruiisUIU | rs3824254  | 4.56                         | 4.36             | 0.088                | 2.9                      | 7                             | 0.3425                            | 8.196  | 0.15               | 7.714   | 8.099           | 8.179  | 8.299           | 8.634                   |
| C8orf32  | TILDb.70JlruiisUIU | rs6470153  | 4.56                         | 4.36             | 0.088                | 2.9                      | 9.24                          | 0.3425                            | 8.196  | 0.15               | 7.714   | 8.099           | 8.179  | 8.299           | 8.634                   |
| C8orf37  | rkkT0oDSXQD9yUFU   | rs2514572  | 3.86                         | 3.70             | -0.074               | 2.57                     | -22.78                        | 0.0678                            | 7.116  | 0.013              | 7.098   | 7.107           | 7.114  | 7.123           | 7.174                   |
| C8orf40  | KdQunQC_IESoF5EzUo | rs2272685  | 5.39                         | 5.15             | 0.109                | 1.65                     | -42.65                        | 0.4125                            | 10.372 | 0.282              | 8.25    | 10.224          | 10.366 | 10.565          | 10.945                  |
| C8orf40  | KdQunQC_IESoF5EzUo | rs7818789  | 5.32                         | 5.08             | 0.108                | 1.47                     | -42.5                         | 0.425                             | 10.372 | 0.282              | 8.25    | 10.224          | 10.366 | 10.565          | 10.945                  |
| C8orf40  | KdQunQC_IESoF5EzUo | rs2974298  | 4.88                         | 4.67             | -0.1                 | 1.37                     | -20.28                        | 0.4673                            | 10.372 | 0.282              | 8.25    | 10.224          | 10.366 | 10.565          | 10.945                  |
| C8orf40  | KdQunQC_IESoF5EzUo | rs2974352  | 6.11                         | 5.84             | -0.126               | 2.18                     | 0.36                          | 0.3975                            | 10.372 | 0.282              | 8.25    | 10.224          | 10.366 | 10.565          | 10.945                  |
| C8orf40  | KdQunQC_IESoF5EzUo | rs2356610  | 6.76                         | 6.46             | 0.141                | 2.43                     | 38.12                         | 0.3864                            | 10.372 | 0.282              | 8.25    | 10.224          | 10.366 | 10.565          | 10.945                  |
| C8orf40  | KdQunQC_IESoF5EzUo | rs7004796  | 5.5                          | 5.26             | 0.113                | 1.15                     | 42.05                         | 0.465                             | 10.372 | 0.282              | 8.25    | 10.224          | 10.366 | 10.565          | 10.945                  |
| C8orf46  | fohepNC53.CCqc1SKE | rs2303519  | 4.31                         | 4.13             | -0.084               | 4.09                     | -36.58                        | 0.1825                            | 7.261  | 0.094              | 7.116   | 7.19            | 7.248  | 7.314           | 7.63                    |
| C8orf46  | fohepNC53.CCqc1SKE | rs2555575  | 6.89                         | 6.58             | 0.14                 | 3.93                     | -30.25                        | 0.4725                            | 7.261  | 0.094              | 7.116   | 7.19            | 7.248  | 7.314           | 7.63                    |
| C8orf46  | fohepNC53.CCqc1SKE | rs1060242  | 8.3                          | 7.92             | 0.166                | 4.19                     | -25.24                        | 0.4825                            | 7.261  | 0.094              | 7.116   | 7.19            | 7.248  | 7.314           | 7.63                    |
| C8orf46  | fohepNC53.CCqc1SKE | rs1978566  | 6.09                         | 5.82             | 0.121                | 3.95                     | -20.68                        | 0.395                             | 7.261  | 0.094              | 7.116   | 7.19            | 7.248  | 7.314           | 7.63                    |
| C8orf46  | fohepNC53.CCqc1SKE | rs10283103 | 3.53                         | 3.38             | 0.068                | 3.57                     | -12.15                        | 0.21                              | 7.261  | 0.094              | 7.116   | 7.19            | 7.248  | 7.314           | 7.63                    |
| C8orf46  | fohepNC53.CCqc1SKE | rs4386964  | 3.41                         | 3.26             | 0.065                | 3.54                     | -9.86                         | 0.205                             | 7.261  | 0.094              | 7.116   | 7.19            | 7.248  | 7.314           | 7.63                    |
| C8orf46  | fohepNC53.CCqc1SKE | rs9657084  | 3.29                         | 3.15             | 0.062                | 2.7                      | 1.42                          | 0.1575                            | 7.261  | 0.094              | 7.116   | 7.19            | 7.248  | 7.314           | 7.63                    |
| C9orf135 | 6eUSv_ie39chNRaPok | rs17517599 | 65.13                        | 61.99            | -0.794               | 6.8                      | -25.41                        | 0.0875                            | 7.266  | 0.333              | 7.099   | 7.113           | 7.121  | 7.137           | 8.602                   |
| C9orf135 | 6eUSv_ie39chNRaPok | rs9314727  | 9.22                         | 8.80             | 0.183                | 2.77                     | -18.49                        | 0.285                             | 7.266  | 0.333              | 7.099   | 7.113           | 7.121  | 7.137           | 8.602                   |
| C9orf135 | 6eUSv_ie39chNRaPok | rs10511972 | 5.58                         | 5.33             | -0.113               | 1.76                     | 6.81                          | 0.4623                            | 7.266  | 0.333              | 7.099   | 7.113           | 7.121  | 7.137           | 8.602                   |
| C9orf135 | 6eUSv_ie39chNRaPok | rs4439190  | 10.92                        | 10.42            | -0.223               | 3.47                     | 10.32                         | 0.304                             | 7.266  | 0.333              | 7.099   | 7.113           | 7.121  | 7.137           | 8.602                   |
| C9orf135 | 6eUSv_ie39chNRaPok | rs10521434 | 74.8                         | 71.18            | 0.842                | 7.27                     | 13.26                         | 0.0975                            | 7.266  | 0.333              | 7.099   | 7.113           | 7.121  | 7.137           | 8.602                   |
| C9orf135 | 6eUSv_ie39chNRaPok | rs4263835  | 3.63                         | 3.47             | -0.07                | 2.96                     | 15.3                          | 0.365                             | 7.266  | 0.333              | 7.099   | 7.113           | 7.121  | 7.137           | 8.602                   |
| C9orf135 | 6eUSv_ie39chNRaPok | rs13284442 | 5.94                         | 5.67             | 0.117                | 2.35                     | -32.73                        | 0.2638                            | 7.266  | 0.333              | 7.099   | 7.113           | 7.121  | 7.137           | 8.602                   |
| C9orf135 | 6eUSv_ie39chNRaPok | rs10780686 | 3.58                         | 3.43             | -0.07                | 1.84                     | -28.19                        | 0.36                              | 7.266  | 0.333              | 7.099   | 7.113           | 7.121  | 7.137           | 8.602                   |
| C9orf135 | 6eUSv_ie39chNRaPok | rs6559841  | 5.83                         | 5.57             | -0.123               | 1.8                      | -12.85                        | 0.385                             | 7.266  | 0.333              | 7.099   | 7.113           | 7.121  | 7.137           | 8.602                   |
| C9orf156 | TTOHPXuq1_u3cq3wok | rs6586     | 4.63                         | 4.43             | 0.086                | 2.72                     | 0.16                          | 0.38                              | 9.813  | 0.231              | 8.886   | 9.692           | 9.797  | 9.954           | 10.496                  |
| C9orf156 | TTOHPXuq1_u3cq3wok | rs1561958  | 4.43                         | 4.24             | 0.082                | 2.52                     | 3.03                          | 0.3775                            | 9.813  | 0.231              | 8.886   | 9.692           | 9.797  | 9.954           | 10.496                  |
| C9orf3   | WrvJSkREAp192wGSXU | rs471161   | 3.39                         | 3.25             | -0.063               | 1.57                     | 11.59                         | 0.11                              | 7.215  | 0.062              | 7.102   | 7.163           | 7.212  | 7.247           | 7.485                   |
| C9orf3   | WrvJSkREAp192wGSXU | rs380205   | 3.39                         | 3.25             | 0.063                | 1.57                     | 42.56                         | 0.11                              | 7.215  | 0.062              | 7.102   | 7.163           | 7.212  | 7.247           | 7.485                   |
| C9orf30  | opQDUkjlmlu4jplooE | rs2026998  | 5.58                         | 5.23             | 0.113                | 2.15                     | -8.05                         | 0.205                             | 8.378  | 0.231              | 7.785   | 8.215           | 8.36   | 8.545           | 9.087                   |
| C9orf30  | opQDUkjlmlu4jplooE | rs10989094 | 3.71                         | 3.56             | 0.073                | 1.72                     | -10.92                        | 0.2625                            | 8.378  | 0.231              | 7.785   | 8.215           | 8.36   | 8.545           | 9.087                   |

| Symbol   | Lumi nuID           | SNP        | Population-based | Population-based          | % Variance | Family-based     | Distance from   | MAF    | Mean      | Transcript abundance (log2 scale) |            |            |            |         | SNP mapping under probe |     |
|----------|---------------------|------------|------------------|---------------------------|------------|------------------|-----------------|--------|-----------|-----------------------------------|------------|------------|------------|---------|-------------------------|-----|
|          |                     |            | association      | association               |            | association      |                 |        |           | Standard                          | 25th       | Median     | 75th       | Maximum |                         |     |
|          |                     |            | p-value (-log10) | p-value (-log10), GC adj. | Explained  | p-value (-log10) | transcript (kb) |        | Deviation | Minimum                           | percentile | percentile | percentile | Maximum |                         |     |
| C9orf30  | opQDUkjlmlu4jplooE  | rs10989097 | 3.71             | 3.56                      | 0.073      | 1.72             | -1.71           | 0.2625 | 8.378     | 0.231                             | 7.785      | 8.215      | 8.36       | 8.545   | 9.087                   |     |
| C9orf30  | opQDUkjlmlu4jplooE  | rs7865385  | 4.06             | 3.88                      | -0.081     | 2.72             | 34.07           | 0.1802 | 8.378     | 0.231                             | 7.785      | 8.215      | 8.36       | 8.545   | 9.087                   |     |
| C9orf46  | uIJfXrVj71PCfzXRCU  | rs2381277  | 3.55             | 3.40                      | -0.07      | 0.88             | 23.9            | 0.36   | 10.132    | 0.411                             | 8.617      | 9.99       | 10.206     | 10.363  | 10.747                  |     |
| C9orf91  | 0qzIUIXoCnn_iCniJ   | rs7853552  | 4.18             | 4.00                      | -0.08      | 1.64             | -12.84          | 0.205  | 8.137     | 0.165                             | 7.733      | 8.024      | 8.123      | 8.234   | 8.699                   |     |
| C9orf94  | cbpel.8okKullIXxUSM | rs7019789  | 4.01             | 3.84                      | -0.074     | 2.5              | 22.29           | 0.2625 | 7.111     | 0.008                             | 7.096      | 7.105      | 7.109      | 7.116   | 7.147                   |     |
| C9orf95  | rdXdSomTlxJlnRLiOg  | rs11144203 | 3.96             | 3.79                      | 0.075      | 1.28             | -6.04           | 0.12   | 10.259    | 0.374                             | 9.224      | 10.005     | 10.28      | 10.513  | 11.133                  |     |
| C9orf95  | rdXdSomTlxJlnRLiOg  | rs911737   | 3.62             | 3.47                      | 0.07       | 1.31             | 4.7             | 0.43   | 10.259    | 0.374                             | 9.224      | 10.005     | 10.28      | 10.513  | 11.133                  |     |
| C9orf95  | rdXdSomTlxJlnRLiOg  | rs3752955  | 10.85            | 10.35                     | -0.208     | 3.06             | 8.57            | 0.4175 | 10.259    | 0.374                             | 9.224      | 10.005     | 10.28      | 10.513  | 11.133                  |     |
| C9orf95  | rdXdSomTlxJlnRLiOg  | rs2273766  | 7.06             | 6.75                      | -0.134     | 2.6              | -5.47           | 0.3325 | 10.259    | 0.374                             | 9.224      | 10.005     | 10.28      | 10.513  | 11.133                  |     |
| C9orf95  | rdXdSomTlxJlnRLiOg  | rs10869497 | 6.32             | 6.04                      | 0.122      | 1.36             | 2.47            | 0.4724 | 10.259    | 0.374                             | 9.224      | 10.005     | 10.28      | 10.513  | 11.133                  |     |
| C9orf95  | rdXdSomTlxJlnRLiOg  | rs3780178  | 7.49             | 7.16                      | 0.142      | 2.21             | 5.05            | 0.3375 | 10.259    | 0.374                             | 9.224      | 10.005     | 10.28      | 10.513  | 11.133                  |     |
| C9orf95  | rdXdSomTlxJlnRLiOg  | rs10123421 | 3.91             | 3.74                      | 0.074      | 1.21             | 10.18           | 0.2449 | 10.259    | 0.374                             | 9.224      | 10.005     | 10.28      | 10.513  | 11.133                  |     |
| C9orf95  | rdXdSomTlxJlnRLiOg  | rs10869503 | 6.25             | 5.97                      | -0.12      | 2.36             | 23.51           | 0.3225 | 10.259    | 0.374                             | 9.224      | 10.005     | 10.28      | 10.513  | 11.133                  |     |
| C9orf95  | rdXdSomTlxJlnRLiOg  | rs7872448  | 4.29             | 4.11                      | 0.083      | 1.06             | 45.87           | 0.2576 | 10.259    | 0.374                             | 9.224      | 10.005     | 10.28      | 10.513  | 11.133                  |     |
| CA6      | BV6pJ76j3jwCKoBJTU  | rs12091891 | 9.07             | 8.66                      | 0.178      | 1.8              | -5.7            | 0.06   | 7.194     | 0.065                             | 7.103      | 7.148      | 7.179      | 7.225   | 7.542                   |     |
| CA6      | BV6pJ76j3jwCKoBJTU  | rs6692694  | 4.23             | 4.05                      | 0.083      | 2.17             | -5.04           | 0.1175 | 7.194     | 0.065                             | 7.103      | 7.148      | 7.179      | 7.225   | 7.542                   |     |
| CACHD1   | ZRrwCeeUvJQHfPQRQPk | rs11808959 | 3.76             | 3.60                      | 0.071      | 2.34             | 44.8            | 0.1075 | 7.341     | 0.18                              | 7.103      | 7.203      | 7.313      | 7.455   | 8.001                   |     |
| CACNA2D4 | ilV8SSCEeSdghJ8Lpl  | rs2058112  | 3.93             | 3.76                      | -0.073     | 1.28             | -38.97          | 0.1275 | 8.206     | 0.239                             | 7.396      | 8.05       | 8.2        | 8.343   | 8.925                   | Yes |
| CACNA2D4 | ilV8SSCEeSdghJ8Lpl  | rs2108642  | 6.61             | 6.31                      | -0.127     | 1.85             | -34.32          | 0.47   | 8.206     | 0.239                             | 7.396      | 8.05       | 8.2        | 8.343   | 8.925                   | Yes |
| CACNA2D4 | ilV8SSCEeSdghJ8Lpl  | rs2286383  | 7.57             | 7.23                      | 0.146      | 1.74             | -9.75           | 0.435  | 8.206     | 0.239                             | 7.396      | 8.05       | 8.2        | 8.343   | 8.925                   | Yes |
| CACNA2D4 | ilV8SSCEeSdghJ8Lpl  | rs9805049  | 7.57             | 7.23                      | -0.146     | 1.74             | -7.47           | 0.435  | 8.206     | 0.239                             | 7.396      | 8.05       | 8.2        | 8.343   | 8.925                   | Yes |
| CACNA2D4 | ilV8SSCEeSdghJ8Lpl  | rs1044471  | 3.58             | 3.48                      | -0.067     | 1.14             | -4.17           | 0.48   | 8.206     | 0.239                             | 7.396      | 8.05       | 8.2        | 8.343   | 8.925                   | Yes |
| CACNA2D4 | ilV8SSCEeSdghJ8Lpl  | rs7294540  | 11               | 10.50                     | -0.209     | 4.03             | -1.41           | 0.41   | 8.206     | 0.239                             | 7.396      | 8.05       | 8.2        | 8.343   | 8.925                   | Yes |
| CACNA2D4 | ilV8SSCEeSdghJ8Lpl  | rs1044825  | 10.75            | 10.26                     | -0.205     | 4.17             | 0.36            | 0.4125 | 8.206     | 0.239                             | 7.396      | 8.05       | 8.2        | 8.343   | 8.925                   | Yes |
| CACNA2D4 | ilV8SSCEeSdghJ8Lpl  | rs2887631  | 4.07             | 3.89                      | 0.075      | 1.92             | 33.46           | 0.245  | 8.206     | 0.239                             | 7.396      | 8.05       | 8.2        | 8.343   | 8.925                   | Yes |
| CADM1    | QeSdz1iV8kVPWFMsw0  | rs17117977 | 3.48             | 3.33                      | 0.07       | 1.29             | -43.59          | 0.1775 | 7.375     | 0.138                             | 7.132      | 7.263      | 7.355      | 7.465   | 7.819                   |     |
| CADM1    | QeSdz1iV8kVPWFMsw0  | rs2427650  | 3.75             | 3.59                      | 0.073      | 4.44             | -43.38          | 0.4575 | 7.375     | 0.138                             | 7.132      | 7.263      | 7.355      | 7.465   | 7.819                   |     |
| CADM1    | QeSdz1iV8kVPWFMsw0  | rs4938180  | 5.43             | 5.19                      | 0.107      | 3.67             | -4              | 0.44   | 7.375     | 0.138                             | 7.132      | 7.263      | 7.355      | 7.465   | 7.819                   |     |
| CADM1    | QeSdz1iV8kVPWFMsw0  | rs4936322  | 5.02             | 4.80                      | -0.1       | 2.75             | 16.52           | 0.4015 | 7.375     | 0.138                             | 7.132      | 7.263      | 7.355      | 7.465   | 7.819                   |     |
| CADM1    | QeSdz1iV8kVPWFMsw0  | rs7101437  | 5.62             | 5.37                      | -0.113     | 3.85             | 18.62           | 0.3669 | 7.375     | 0.138                             | 7.132      | 7.263      | 7.355      | 7.465   | 7.819                   |     |
| CADM1    | QeSdz1iV8kVPWFMsw0  | rs6589485  | 3.8              | 3.64                      | 0.077      | 3.58             | 38.86           | 0.425  | 7.375     | 0.138                             | 7.132      | 7.263      | 7.355      | 7.465   | 7.819                   |     |
| CADM1    | QeSdz1iV8kVPWFMsw0  | rs11602686 | 3.56             | 3.41                      | -0.07      | 1.61             | 55.62           | 0.4975 | 7.375     | 0.138                             | 7.132      | 7.263      | 7.355      | 7.465   | 7.819                   |     |
| CADPS    | uilDs4k17fepdULjo   | rs514606   | 3.89             | 3.72                      | -0.076     | 2.29             | -28.82          | 0.1475 | 7.128     | 0.017                             | 7.101      | 7.117      | 7.127      | 7.137   | 7.211                   |     |
| CAMK4    | i6ByKklySKlJ4le6KI  | rs7709420  | 4.97             | 4.75                      | -0.098     | 1.21             | -15.46          | 0.21   | 8.36      | 0.304                             | 7.287      | 8.166      | 8.369      | 8.547   | 9.384                   |     |
| CAMK4    | i6ByKklySKlJ4le6KI  | rs9285875  | 4.05             | 3.88                      | -0.082     | 0.82             | 8.38            | 0.2475 | 8.36      | 0.304                             | 7.287      | 8.166      | 8.369      | 8.547   | 9.384                   |     |
| CAMKK2   | KOMbAZ1.qBU9ipJaag  | rs3794207  | 4.06             | 3.88                      | 0.08       | 2.7              | 4.69            | 0.3425 | 8.349     | 0.465                             | 7.467      | 8.031      | 8.274      | 8.569   | 10.018                  | Yes |
| CAMLG    | ZrdJSVyleffu.u097U  | rs2108665  | 4.63             | 4.43                      | 0.091      | 1.97             | 48.49           | 0.1025 | 12.067    | 0.206                             | 11.575     | 11.929     | 12.073     | 12.197  | 12.545                  |     |
| CAMSAP1  | ubvYRJZ3e17AyoHAp4  | rs3739464  | 3.37             | 3.23                      | 0.059      | 0.14             | 5.65            | 0.1    | 8.728     | 0.23                              | 8.123      | 8.583      | 8.724      | 8.863   | 9.771                   |     |
| CAMSAP1  | ubvYRJZ3e17AyoHAp4  | rs10114302 | 3.35             | 3.21                      | -0.059     | 0.12             | 17.55           | 0.1025 | 8.728     | 0.23                              | 8.123      | 8.583      | 8.724      | 8.863   | 9.771                   |     |
| CAMSAP1  | ubvYRJZ3e17AyoHAp4  | rs12345642 | 3.45             | 3.31                      | 0.06       | 0.91             | 29.64           | 0.2425 | 8.728     | 0.23                              | 8.123      | 8.583      | 8.724      | 8.863   | 9.771                   |     |
| CAPN11   | NlB98V1OfntedEXF54  | rs6938938  | 21.14            | 20.14                     | -0.384     | 1.75             | -11.05          | 0.1005 | 7.319     | 0.219                             | 7.11       | 7.178      | 7.25       | 7.363   | 8.21                    |     |
| CAPN12   | oFHel5sddHSAQgSYSU  | rs749702   | 4.45             | 4.26                      | -0.089     | 1.5              | -30.94          | 0.12   | 7.639     | 0.231                             | 7.167      | 7.465      | 7.597      | 7.815   | 8.226                   |     |
| CAPN12   | oFHel5sddHSAQgSYSU  | rs4802747  | 3.51             | 3.36                      | -0.067     | 2.67             | -30.24          | 0.1875 | 7.639     | 0.231                             | 7.167      | 7.465      | 7.597      | 7.815   | 8.226                   |     |
| CAPN12   | oFHel5sddHSAQgSYSU  | rs12978914 | 7.05             | 6.73                      | -0.14      | 2.87             | 2.88            | 0.075  | 7.639     | 0.231                             | 7.167      | 7.465      | 7.597      | 7.815   | 8.226                   |     |
| CAPN12   | oFHel5sddHSAQgSYSU  | rs2368524  | 4.08             | 3.91                      | 0.078      | 1.83             | 17.12           | 0.0925 | 7.639     | 0.231                             | 7.167      | 7.465      | 7.597      | 7.815   | 8.226                   |     |
| CAPN9    | Qu6BTxlSr0dV3TbWl8  | rs1316409  | 3.44             | 3.29                      | 0.066      | 2.45             | 2.62            | 0.3625 | 7.129     | 0.023                             | 7.102      | 7.115      | 7.125      | 7.139   | 7.311                   |     |
| CAPN9    | TZRe5fE1K9KTRyf1RE  | rs1316409  | 3.34             | 3.20                      | 0.062      | 2.51             | 2.62            | 0.3625 | 7.113     | 0.009                             | 7.096      | 7.107      | 7.112      | 7.118   | 7.146                   |     |
| CAPN9    | Qu6BTxlSr0dV3TbWl8  | rs1890350  | 3.4              | 3.26                      | -0.067     | 3.02             | 11.2            | 0.495  | 7.129     | 0.023                             | 7.102      | 7.115      | 7.125      | 7.139   | 7.311                   |     |
| CAPN9    | Qu6BTxlSr0dV3TbWl8  | rs7523730  | 4.08             | 3.91                      | 0.082      | 2.52             | 14.73           | 0.3643 | 7.129     | 0.023                             | 7.102      | 7.115      | 7.125      | 7.139   | 7.311                   |     |
| CAPN9    | Qu6BTxlSr0dV3TbWl8  | rs4847011  | 3.9              | 3.74                      | 0.078      | 2.13             | 16.85           | 0.34   | 7.129     | 0.023                             | 7.102      | 7.115      | 7.125      | 7.139   | 7.311                   |     |
| CAPN9    | Qu6BTxlSr0dV3TbWl8  | rs12121628 | 3.9              | 3.74                      | 0.078      | 2.18             | 17.59           | 0.34   | 7.129     | 0.023                             | 7.102      | 7.115      | 7.125      | 7.139   | 7.311                   |     |
| CAPN9    | Qu6BTxlSr0dV3TbWl8  | rs12129824 | 4.18             | 4.00                      | -0.085     | 2.91             | 23.93           | 0.3367 | 7.129     | 0.023                             | 7.102      | 7.115      | 7.125      | 7.139   | 7.311                   |     |
| CAPN9    | Qu6BTxlSr0dV3TbWl8  | rs11122597 | 3.57             | 3.42                      | 0.071      | 2.91             | -24.57          | 0.385  | 7.129     | 0.023                             | 7.102      | 7.115      | 7.125      | 7.139   | 7.311                   |     |
| CAPN9    | TZRe5fE1K9KTRyf1RE  | rs11122597 | 3.52             | 3.38                      | 0.067      | 1.96             | -24.57          | 0.385  | 7.113     | 0.009                             | 7.096      | 7.107      | 7.112      | 7.118   | 7.146                   |     |
| CARD8    | o4O4PKFJkODnQvqqqY  | rs1062808  | 9.69             | 9.25                      | 0.188      | 3.7              | -0.04           | 0.3275 | 9.165     | 0.358                             | 8.166      | 8.957      | 9.148      | 9.424   | 10.044                  |     |
| CARD8    | o4O4PKFJkODnQvqqqY  | rs6509365  | 6.05             | 5.79                      | -0.118     | 2.58             | -9.46           | 0.3125 | 9.165     | 0.358                             | 8.166      | 8.957      | 9.148      | 9.424   | 10.044                  |     |
| CARD8    | o4O4PKFJkODnQvqqqY  | rs6509366  | 6.3              | 6.02                      | 0.122      | 3.04             | -9.35           | 0.309  | 9.165     | 0.358                             | 8.166      | 8.957      | 9.148      | 9.424   | 10.044                  |     |
| CARD8    | o4O4PKFJkODnQvqqqY  | rs17360180 | 7.26             | 6.93                      | -0.142     | 2.93             | 33.84           | 0.175  | 9.165     | 0.358                             | 8.166      | 8.957      | 9.148      | 9.424   | 10.044                  |     |
| CARHSP1  | fqu9WINJElzhT5BBd0  | rs2075827  | 4.46             | 4.27                      | 0.086      | 3.34             | -6.95           | 0.2525 | 10.336    | 0.293                             | 9.561      | 10.123     | 10.327     | 10.537  | 11.068                  | Yes |
| CASC1    | xuUTnndxSPnScdcF1E  | rs1979522  | 3.66             | 3.50                      | 0.064      | 0.68             | -17.33          | 0.115  | 7.174     | 0.051                             | 7.103      | 7.142      | 7.168      | 7.191   | 7.574                   |     |
| CASC1    | xuUTnndxSPnScdcF1E  | rs10842513 | 6.93             | 6.62                      | 0.127      | 0.5              | 36.56           | 0.1075 | 7.174     | 0.051                             | 7.103      | 7.142      | 7.168      | 7.191   | 7.574                   |     |
| CASP7    | ZqEuKSiCBCA6OwI6VM  | rs12769185 | 4.15             | 3.97                      | 0.079      | 1.75             | -6.46           | 0.395  | 7.978     | 0.26                              | 7.138      | 7.817      | 7.996      | 8.136   | 9.025                   |     |

| Symbol  | Lumi nuID          | SNP        | Population-based | Population-based          | % Variance | Family-based     | Distance from   | MAF    | Mean      | Transcript abundance (log2 scale) |            |            |            |         | SNP mapping under probe |     |
|---------|--------------------|------------|------------------|---------------------------|------------|------------------|-----------------|--------|-----------|-----------------------------------|------------|------------|------------|---------|-------------------------|-----|
|         |                    |            | association      | association               |            | association      |                 |        |           | Standard                          | 25th       | Median     | 75th       | Maximum |                         |     |
|         |                    |            | p-value (-log10) | p-value (-log10), GC adj. | Explained  | p-value (-log10) | transcript (kb) |        | Deviation | Minimum                           | percentile | percentile | percentile | Maximum |                         |     |
| CBR3    | 3J4Sj3rg5ueVKFLghl | rs2409758  | 9.57             | 9.13                      | -0.19      | 3.3              | -16.61          | 0.3375 | 8.99      | 0.509                             | 7.785      | 8.623      | 8.978      | 9.344   | 10.249                  |     |
| CBR3    | 3J4Sj3rg5ueVKFLghl | rs4816519  | 4.02             | 3.84                      | -0.076     | 4.7              | -12.29          | 0.1125 | 8.99      | 0.509                             | 7.785      | 8.623      | 8.978      | 9.344   | 10.249                  |     |
| CBR3    | 3J4Sj3rg5ueVKFLghl | rs2212922  | 8.31             | 7.93                      | -0.165     | 1.61             | -8.91           | 0.4675 | 8.99      | 0.509                             | 7.785      | 8.623      | 8.978      | 9.344   | 10.249                  |     |
| CBR3    | 3J4Sj3rg5ueVKFLghl | rs8133052  | 5.23             | 5.00                      | -0.105     | 1.06             | 0.24            | 0.4615 | 8.99      | 0.509                             | 7.785      | 8.623      | 8.978      | 9.344   | 10.249                  |     |
| CBR3    | 3J4Sj3rg5ueVKFLghl | rs1541320  | 5.91             | 5.65                      | 0.12       | 5.06             | -4.54           | 0.12   | 8.99      | 0.509                             | 7.785      | 8.623      | 8.978      | 9.344   | 10.249                  |     |
| CBR3    | 3J4Sj3rg5ueVKFLghl | rs1056892  | 7.52             | 7.19                      | 0.148      | 2.53             | -0.15           | 0.3625 | 8.99      | 0.509                             | 7.785      | 8.623      | 8.978      | 9.344   | 10.249                  |     |
| CBR3    | 3J4Sj3rg5ueVKFLghl | rs1028997  | 7.52             | 7.19                      | 0.148      | 2.5              | 13.36           | 0.3625 | 8.99      | 0.509                             | 7.785      | 8.623      | 8.978      | 9.344   | 10.249                  |     |
| CBR3    | 3J4Sj3rg5ueVKFLghl | rs13046990 | 7.03             | 6.72                      | 0.141      | 1.27             | 14.54           | 0.06   | 8.99      | 0.509                             | 7.785      | 8.623      | 8.978      | 9.344   | 10.249                  |     |
| CBR3    | 3J4Sj3rg5ueVKFLghl | rs2239567  | 4.17             | 3.99                      | 0.087      | 4.35             | 17.55           | 0.1396 | 8.99      | 0.509                             | 7.785      | 8.623      | 8.978      | 9.344   | 10.249                  |     |
| CBR3    | 3J4Sj3rg5ueVKFLghl | rs2835314  | 3.5              | 3.36                      | 0.065      | 0.74             | 49.84           | 0.4125 | 8.99      | 0.509                             | 7.785      | 8.623      | 8.978      | 9.344   | 10.249                  |     |
| CC2D1B  | 6m0essool7VJ9N_14g | rs7513934  | 9.61             | 9.18                      | 0.183      | 3.28             | 1.92            | 0.4925 | 7.791     | 0.206                             | 7.138      | 7.655      | 7.796      | 7.914   | 8.386                   |     |
| CCDC123 | QB91KER0YoSm5KEFUg | rs10404771 | 3.44             | 3.29                      | -0.065     | 0.7              | -11.89          | 0.205  | 7.463     | 0.139                             | 7.199      | 7.361      | 7.453      | 7.538   | 8.05                    |     |
| CCDC123 | QB91KER0YoSm5KEFUg | rs745961   | 9.7              | 9.26                      | -0.189     | 6.07             | 0.17            | 0.35   | 7.463     | 0.139                             | 7.199      | 7.361      | 7.453      | 7.538   | 8.05                    |     |
| CCDC123 | QB91KER0YoSm5KEFUg | rs2868197  | 10.8             | 10.31                     | 0.209      | 6.3              | 7.15            | 0.355  | 7.463     | 0.139                             | 7.199      | 7.361      | 7.453      | 7.538   | 8.05                    |     |
| CCDC123 | QB91KER0YoSm5KEFUg | rs7253956  | 4.01             | 3.84                      | -0.077     | 1.26             | 22.59           | 0.38   | 7.463     | 0.139                             | 7.199      | 7.361      | 7.453      | 7.538   | 8.05                    |     |
| CCDC123 | QB91KER0YoSm5KEFUg | rs10425973 | 8.82             | 8.42                      | 0.173      | 3.29             | 35.19           | 0.195  | 7.463     | 0.139                             | 7.199      | 7.361      | 7.453      | 7.538   | 8.05                    |     |
| CCDC123 | QB91KER0YoSm5KEFUg | rs11668957 | 8.82             | 8.42                      | -0.173     | 3.29             | 39.07           | 0.195  | 7.463     | 0.139                             | 7.199      | 7.361      | 7.453      | 7.538   | 8.05                    |     |
| CCDC123 | QB91KER0YoSm5KEFUg | rs4805827  | 6.11             | 5.84                      | -0.122     | 3.62             | -39.37          | 0.36   | 7.463     | 0.139                             | 7.199      | 7.361      | 7.453      | 7.538   | 8.05                    |     |
| CCDC123 | QB91KER0YoSm5KEFUg | rs6510306  | 6.11             | 5.84                      | -0.122     | 3.78             | -30.16          | 0.36   | 7.463     | 0.139                             | 7.199      | 7.361      | 7.453      | 7.538   | 8.05                    |     |
| CCDC123 | QB91KER0YoSm5KEFUg | rs8107282  | 6.98             | 6.67                      | 0.138      | 4.36             | -14.66          | 0.46   | 7.463     | 0.139                             | 7.199      | 7.361      | 7.453      | 7.538   | 8.05                    |     |
| CCDC123 | QB91KER0YoSm5KEFUg | rs2304102  | 4.87             | 4.66                      | -0.095     | 4.47             | 4.49            | 0.3925 | 7.463     | 0.139                             | 7.199      | 7.361      | 7.453      | 7.538   | 8.05                    |     |
| CCDC127 | Kq3XVjneWe_qm6.fgk | rs6885136  | 5.88             | 5.62                      | 0.116      | 0.65             | -31.68          | 0.4475 | 9.45      | 0.284                             | 8.785      | 9.233      | 9.463      | 9.673   | 10.299                  |     |
| CCDC127 | Kq3XVjneWe_qm6.fgk | rs4956987  | 6.01             | 5.74                      | -0.118     | 0.77             | -30.77          | 0.4875 | 9.45      | 0.284                             | 8.785      | 9.233      | 9.463      | 9.673   | 10.299                  |     |
| CCDC127 | Kq3XVjneWe_qm6.fgk | rs7727015  | 6.54             | 6.25                      | 0.129      | 0.93             | -19.38          | 0.485  | 9.45      | 0.284                             | 8.785      | 9.233      | 9.463      | 9.673   | 10.299                  |     |
| CCDC127 | Kq3XVjneWe_qm6.fgk | rs6874933  | 5.2              | 4.97                      | 0.104      | 1.46             | -16.13          | 0.4822 | 9.45      | 0.284                             | 8.785      | 9.233      | 9.463      | 9.673   | 10.299                  |     |
| CCDC127 | Kq3XVjneWe_qm6.fgk | rs1054174  | 8.07             | 7.71                      | -0.161     | 0.68             | 0.08            | 0.275  | 9.45      | 0.284                             | 8.785      | 9.233      | 9.463      | 9.673   | 10.299                  |     |
| CCDC127 | Kq3XVjneWe_qm6.fgk | rs6878087  | 4.23             | 4.05                      | -0.081     | 0.72             | 4.82            | 0.1375 | 9.45      | 0.284                             | 8.785      | 9.233      | 9.463      | 9.673   | 10.299                  |     |
| CCDC127 | Kq3XVjneWe_qm6.fgk | rs6869925  | 4.23             | 4.05                      | -0.081     | 0.72             | 45.74           | 0.1375 | 9.45      | 0.284                             | 8.785      | 9.233      | 9.463      | 9.673   | 10.299                  |     |
| CCDC134 | 92oolIroruvuuiJFJw | rs17377643 | 4.9              | 4.68                      | -0.095     | 0.26             | -43.69          | 0.4475 | 7.286     | 0.07                              | 7.144      | 7.236      | 7.27       | 7.33    | 7.512                   |     |
| CCDC134 | 92oolIroruvuuiJFJw | rs8139203  | 3.85             | 3.69                      | 0.072      | 0.29             | -30.26          | 0.3275 | 7.286     | 0.07                              | 7.144      | 7.236      | 7.27       | 7.33    | 7.512                   |     |
| CCDC134 | 92oolIroruvuuiJFJw | rs6519287  | 3.85             | 3.69                      | -0.072     | 0.29             | -27.41          | 0.3275 | 7.286     | 0.07                              | 7.144      | 7.236      | 7.27       | 7.33    | 7.512                   |     |
| CCDC134 | 92oolIroruvuuiJFJw | rs738247   | 3.81             | 3.65                      | 0.072      | 0.34             | -6.37           | 0.33   | 7.286     | 0.07                              | 7.144      | 7.236      | 7.27       | 7.33    | 7.512                   |     |
| CCDC134 | 92oolIroruvuuiJFJw | rs2267439  | 3.79             | 3.63                      | 0.072      | 2                | 15.47           | 0.3175 | 7.286     | 0.07                              | 7.144      | 7.236      | 7.27       | 7.33    | 7.512                   |     |
| CCDC134 | 92oolIroruvuuiJFJw | rs133280   | 3.6              | 3.45                      | -0.066     | 0.14             | 33.22           | 0.48   | 7.286     | 0.07                              | 7.144      | 7.236      | 7.27       | 7.33    | 7.512                   |     |
| CCDC134 | 92oolIroruvuuiJFJw | rs714015   | 3.71             | 3.55                      | -0.068     | 0.12             | 36.8            | 0.485  | 7.286     | 0.07                              | 7.144      | 7.236      | 7.27       | 7.33    | 7.512                   |     |
| CCDC134 | 92oolIroruvuuiJFJw | rs133290   | 3.61             | 3.46                      | 0.066      | 0.17             | 45.3            | 0.48   | 7.286     | 0.07                              | 7.144      | 7.236      | 7.27       | 7.33    | 7.512                   |     |
| CCDC23  | rH0evXVN4PpROfngiE | rs17381650 | 3.42             | 3.28                      | -0.067     | 1.55             | -8.48           | 0.0975 | 11.053    | 0.252                             | 10.202     | 10.894     | 11.081     | 11.205  | 11.689                  |     |
| CCDC23  | rH0evXVN4PpROfngiE | rs323720   | 7.43             | 7.10                      | -0.154     | 2.89             | -1.7            | 0.275  | 11.053    | 0.252                             | 10.202     | 10.894     | 11.081     | 11.205  | 11.689                  |     |
| CCDC23  | rH0evXVN4PpROfngiE | rs11210721 | 7.27             | 6.94                      | 0.149      | 3.21             | -0.49           | 0.205  | 11.053    | 0.252                             | 10.202     | 10.894     | 11.081     | 11.205  | 11.689                  |     |
| CCDC23  | rH0evXVN4PpROfngiE | rs17386017 | 8.24             | 7.86                      | -0.168     | 3.6              | 14.16           | 0.24   | 11.053    | 0.252                             | 10.202     | 10.894     | 11.081     | 11.205  | 11.689                  |     |
| CCDC24  | HKXUQKXpiSK3T1JeHc | rs6680421  | 3.54             | 3.39                      | 0.066      | 0.61             | -48.31          | 0.2025 | 7.294     | 0.114                             | 7.115      | 7.21       | 7.276      | 7.356   | 7.761                   |     |
| CCDC24  | HKXUQKXpiSK3T1JeHc | rs4660758  | 4.08             | 3.91                      | 0.077      | 0.62             | -32.4           | 0.1925 | 7.294     | 0.114                             | 7.115      | 7.21       | 7.276      | 7.356   | 7.761                   |     |
| CCDC24  | HKXUQKXpiSK3T1JeHc | rs3791124  | 3.39             | 3.25                      | -0.062     | 0.34             | 2               | 0.125  | 7.294     | 0.114                             | 7.115      | 7.21       | 7.276      | 7.356   | 7.761                   |     |
| CCDC24  | HKXUQKXpiSK3T1JeHc | rs9429225  | 3.6              | 3.44                      | -0.065     | 1.36             | 24.04           | 0.12   | 7.294     | 0.114                             | 7.115      | 7.21       | 7.276      | 7.356   | 7.761                   |     |
| CCDC53  | xochUjffikUjnUuXjo | rs10860831 | 7.09             | 6.77                      | -0.141     | 2.55             | 2.83            | 0.1925 | 10.581    | 0.184                             | 9.998      | 10.475     | 10.608     | 10.719  | 10.984                  | Yes |
| CCDC53  | xochUjffikUjnUuXjo | rs11611487 | 5.3              | 5.07                      | -0.105     | 1.08             | -19.92          | 0.3418 | 10.581    | 0.184                             | 9.998      | 10.475     | 10.608     | 10.719  | 10.984                  | Yes |
| CCDC53  | xochUjffikUjnUuXjo | rs17437668 | 11.95            | 11.40                     | -0.232     | 2.83             | 7.29            | 0.185  | 10.581    | 0.184                             | 9.998      | 10.475     | 10.608     | 10.719  | 10.984                  | Yes |
| CCDC53  | xochUjffikUjnUuXjo | rs10507139 | 9.03             | 8.62                      | 0.18       | 2.84             | 11.14           | 0.1575 | 10.581    | 0.184                             | 9.998      | 10.475     | 10.608     | 10.719  | 10.984                  | Yes |
| CCDC53  | xochUjffikUjnUuXjo | rs11111153 | 9.67             | 9.17                      | -0.197     | 2.6              | 20.24           | 0.2175 | 10.581    | 0.184                             | 9.998      | 10.475     | 10.608     | 10.719  | 10.984                  | Yes |
| CCDC53  | xochUjffikUjnUuXjo | rs10083092 | 10.14            | 9.67                      | 0.197      | 2.51             | 22.85           | 0.2175 | 10.581    | 0.184                             | 9.998      | 10.475     | 10.608     | 10.719  | 10.984                  | Yes |
| CCDC81  | 6eOkuCu3g614cgcXnk | rs3741005  | 3.59             | 3.44                      | 0.066      | 0.94             | -10.59          | 0.11   | 7.212     | 0.073                             | 7.117      | 7.165      | 7.197      | 7.24    | 7.828                   |     |
| CKK     | 3LOLFXXIoVJZTSVBqA | rs9311321  | 3.55             | 3.40                      | -0.069     | 0.16             | 33.65           | 0.0779 | 7.131     | 0.017                             | 7.097      | 7.12       | 7.128      | 7.139   | 7.211                   |     |
| CCL20   | xX56r6K.R_RNOir8uc | rs3138112  | 4                | 3.83                      | 0.077      | 1.32             | -11.11          | 0.2375 | 7.556     | 0.231                             | 7.119      | 7.382      | 7.535      | 7.704   | 8.578                   |     |
| CCL20   | xX56r6K.R_RNOir8uc | rs13389224 | 4.69             | 4.49                      | 0.093      | 2.36             | -9.54           | 0.3872 | 7.556     | 0.231                             | 7.119      | 7.382      | 7.535      | 7.704   | 8.578                   |     |
| CCL20   | xX56r6K.R_RNOir8uc | rs11694155 | 8.13             | 7.77                      | -0.161     | 2.55             | -7.15           | 0.1525 | 7.556     | 0.231                             | 7.119      | 7.382      | 7.535      | 7.704   | 8.578                   |     |
| CCND1   | 3aZ9UkUE7BaTv1JIIQ | rs7939467  | 3.65             | 3.49                      | 0.069      | 1.48             | -45.57          | 0.2814 | 7.394     | 0.186                             | 7.103      | 7.256      | 7.372      | 7.489   | 8.022                   |     |
| CCND1   | 3aZ9UkUE7BaTv1JIIQ | rs7948678  | 3.69             | 3.54                      | -0.069     | 1.48             | -45.51          | 0.2825 | 7.394     | 0.186                             | 7.103      | 7.256      | 7.372      | 7.489   | 8.022                   |     |
| CCND1   | 3aZ9UkUE7BaTv1JIIQ | rs1872568  | 3.59             | 3.44                      | -0.068     | 1.3              | -37.73          | 0.285  | 7.394     | 0.186                             | 7.103      | 7.256      | 7.372      | 7.489   | 8.022                   |     |
| CCND1   | 3aZ9UkUE7BaTv1JIIQ | rs7930159  | 3.57             | 3.42                      | 0.067      | 1.41             | -31.8           | 0.2814 | 7.394     | 0.186                             | 7.103      | 7.256      | 7.372      | 7.489   | 8.022                   |     |
| CCND1   | 3aZ9UkUE7BaTv1JIIQ | rs10908195 | 4.23             | 4.05                      | 0.084      | 1.8              | -24.46          | 0.301  | 7.394     | 0.186                             | 7.103      | 7.256      | 7.372      | 7.489   | 8.022                   |     |
| CCND3   | Zle_EST.XCnkK.Keuk | rs4130023  | 3.42             | 3.28                      | -0.066     | 1.42             | 24.96           | 0.2025 | 13.483    | 0.294                             | 11.812     | 13.333     | 13.48      | 13.643  | 14.227                  |     |
| CCR4    | feSkn.3dUchC1JekKs | rs12167    | 3.52             | 3.38                      | 0.065      | 0.64             | 41.78           | 0.27   | 7.788     | 0.32                              | 7.134      | 7.585      | 7.806      | 8.013   | 8.841                   |     |

| Symbol   | Lumi nuID           | SNP        | Population-based             | Population-based                      | % Variance Explained | Family-based                 | Distance from transcript (kb) | MAF    | Mean   | Transcript abundance (log2 scale) |         |                 |        |                 | SNP mapping under probe |         |
|----------|---------------------|------------|------------------------------|---------------------------------------|----------------------|------------------------------|-------------------------------|--------|--------|-----------------------------------|---------|-----------------|--------|-----------------|-------------------------|---------|
|          |                     |            | association p-value (-log10) | association p-value (-log10), GC adj. |                      | association p-value (-log10) |                               |        |        | Standard Deviation                | Minimum | 25th percentile | Median | 75th percentile |                         | Maximum |
| CCS      | cR.UfUiiqlqH_XIS38  | rs490998   | 3.4                          | 3.26                                  | 0.063                | 2.33                         | -41.72                        | 0.455  | 9.12   | 0.404                             | 8.151   | 8.847           | 9.088  | 9.375           | 10.462                  |         |
| CCS      | cR.UfUiiqlqH_XIS38  | rs556759   | 3.7                          | 3.54                                  | 0.069                | 1.67                         | -1.1                          | 0.4975 | 9.12   | 0.404                             | 8.151   | 8.847           | 9.088  | 9.375           | 10.462                  |         |
| CCT5     | ZSIEX.JJff6FEt81iq0 | rs2259642  | 7.73                         | 7.38                                  | 0.152                | 3.14                         | 3.84                          | 0.1325 | 8.353  | 0.173                             | 7.905   | 8.24            | 8.353  | 8.465           | 8.899                   |         |
| CCT5     | ZSIEX.JJff6FEt81iq0 | rs12516390 | 3.62                         | 3.46                                  | -0.067               | 1.39                         | -5.44                         | 0.0575 | 8.353  | 0.173                             | 7.905   | 8.24            | 8.353  | 8.465           | 8.899                   |         |
| CCT5     | ZSIEX.JJff6FEt81iq0 | rs2244722  | 7.73                         | 7.38                                  | 0.152                | 2.92                         | -4.34                         | 0.1325 | 8.353  | 0.173                             | 7.905   | 8.24            | 8.353  | 8.465           | 8.899                   |         |
| CCT5     | ZSIEX.JJff6FEt81iq0 | rs2292267  | 3.95                         | 3.78                                  | 0.075                | 1.73                         | -2.92                         | 0.055  | 8.353  | 0.173                             | 7.905   | 8.24            | 8.353  | 8.465           | 8.899                   |         |
| CCT5     | ZSIEX.JJff6FEt81iq0 | rs2244964  | 7.73                         | 7.38                                  | -0.152               | 2.92                         | -2.78                         | 0.1325 | 8.353  | 0.173                             | 7.905   | 8.24            | 8.353  | 8.465           | 8.899                   |         |
| CCT5     | ZSIEX.JJff6FEt81iq0 | rs2578638  | 3.94                         | 3.77                                  | 0.074                | 1.37                         | -0.43                         | 0.075  | 8.353  | 0.173                             | 7.905   | 8.24            | 8.353  | 8.465           | 8.899                   |         |
| CCT8     | BJz1WZHplAd6LwpQ4l  | rs6516887  | 5.38                         | 5.15                                  | 0.107                | 1.55                         | -26.62                        | 0.1025 | 11.748 | 0.338                             | 8.79    | 11.627          | 11.744 | 11.911          | 12.563                  |         |
| CCT8     | BJz1WZHplAd6LwpQ4l  | rs1064019  | 4.51                         | 4.31                                  | 0.088                | 2.04                         | 3.5                           | 0.3005 | 11.748 | 0.338                             | 8.79    | 11.627          | 11.744 | 11.911          | 12.563                  |         |
| CCT8     | BJz1WZHplAd6LwpQ4l  | rs8133819  | 7.95                         | 7.60                                  | -0.159               | 2.24                         | 12.74                         | 0.14   | 11.748 | 0.338                             | 8.79    | 11.627          | 11.744 | 11.911          | 12.563                  |         |
| CD151    | ivVJKqIBX0RVKv9KB4  | rs7126805  | 4.24                         | 4.05                                  | -0.081               | 1.72                         | -4.06                         | 0.3225 | 7.667  | 0.252                             | 7.173   | 7.491           | 7.634  | 7.817           | 9.029                   |         |
| CD151    | ivVJKqIBX0RVKv9KB4  | rs3059     | 4.83                         | 4.62                                  | 0.09                 | 3.4                          | 1.48                          | 0.355  | 7.667  | 0.252                             | 7.173   | 7.491           | 7.634  | 7.817           | 9.029                   |         |
| CD151    | ilteqJ97UXteSKLb9Q  | rs3059     | 3.48                         | 3.37                                  | 0.063                | 0.78                         | 1.48                          | 0.355  | 7.582  | 0.24                              | 7.191   | 7.416           | 7.536  | 7.699           | 8.502                   |         |
| CD244    | QUhP0EKe6okqe4d6el  | rs4656940  | 3.31                         | 3.14                                  | 0.061                | 2.53                         | -2.38                         | 0.22   | 7.577  | 0.334                             | 7.165   | 7.358           | 7.477  | 7.676           | 9.034                   |         |
| CD244    | QUhP0EKe6okqe4d6el  | rs955371   | 3.31                         | 3.17                                  | 0.061                | 2.53                         | 2.94                          | 0.22   | 7.577  | 0.334                             | 7.165   | 7.358           | 7.477  | 7.676           | 9.034                   |         |
| CD300C   | OUW.0SogkrcrodV5F.k | rs1107704  | 3.6                          | 3.45                                  | -0.066               | 2.27                         | -28.82                        | 0.1375 | 8.068  | 0.777                             | 7.107   | 7.459           | 7.813  | 8.627           | 10.282                  |         |
| CD300C   | OUW.0SogkrcrodV5F.k | rs2134874  | 3.29                         | 3.15                                  | 0.06                 | 1.67                         | 2.94                          | 0.355  | 8.068  | 0.777                             | 7.107   | 7.459           | 7.813  | 8.627           | 10.282                  |         |
| CD53     | 0dVAAtCQiHL4Ki96pSk | rs343769   | 5.01                         | 4.79                                  | -0.096               | 3.47                         | -45.4                         | 0.2915 | 11.21  | 0.26                              | 10.04   | 11.023          | 11.257 | 11.396          | 11.765                  |         |
| CD53     | 0dVAAtCQiHL4Ki96pSk | rs2363536  | 5.09                         | 4.87                                  | -0.099               | 3.86                         | 10.28                         | 0.2864 | 11.21  | 0.26                              | 10.04   | 11.023          | 11.257 | 11.396          | 11.765                  |         |
| CD53     | 0dVAAtCQiHL4Ki96pSk | rs1102184  | 3.71                         | 3.55                                  | 0.069                | 2.58                         | 42.66                         | 0.3175 | 11.21  | 0.26                              | 10.04   | 11.023          | 11.257 | 11.396          | 11.765                  |         |
| CDC16    | 9e1S7KBliHwXwiHo2RE | rs9562157  | 3.46                         | 3.31                                  | -0.066               | 0.45                         | -19.02                        | 0.3    | 10.164 | 0.477                             | 8.045   | 9.856           | 10.136 | 10.478          | 11.554                  |         |
| CDC16    | 9e1S7KBliHwXwiHo2RE | rs7994556  | 5.68                         | 5.43                                  | 0.112                | 1.72                         | -2.3                          | 0.24   | 10.164 | 0.477                             | 8.045   | 9.856           | 10.136 | 10.478          | 11.554                  |         |
| CDC16    | 9e1S7KBliHwXwiHo2RE | rs7994573  | 5.67                         | 5.42                                  | -0.112               | 1.65                         | 8.01                          | 0.2375 | 10.164 | 0.477                             | 8.045   | 9.856           | 10.136 | 10.478          | 11.554                  |         |
| CDC16    | 9e1S7KBliHwXwiHo2RE | rs9314907  | 5.68                         | 5.43                                  | 0.112                | 1.72                         | 14.79                         | 0.24   | 10.164 | 0.477                             | 8.045   | 9.856           | 10.136 | 10.478          | 11.554                  |         |
| CDC16    | 9e1S7KBliHwXwiHo2RE | rs11616761 | 3.6                          | 3.45                                  | -0.071               | 2.1                          | -17.64                        | 0.09   | 10.164 | 0.477                             | 8.045   | 9.856           | 10.136 | 10.478          | 11.554                  |         |
| CDC16    | 9e1S7KBliHwXwiHo2RE | rs7319446  | 5.68                         | 5.43                                  | -0.112               | 1.72                         | -8.99                         | 0.24   | 10.164 | 0.477                             | 8.045   | 9.856           | 10.136 | 10.478          | 11.554                  |         |
| CDC16    | 9e1S7KBliHwXwiHo2RE | rs9590409  | 5.52                         | 5.28                                  | -0.108               | 1.72                         | 2.35                          | 0.2375 | 10.164 | 0.477                             | 8.045   | 9.856           | 10.136 | 10.478          | 11.554                  |         |
| CDC16    | 9e1S7KBliHwXwiHo2RE | rs9562187  | 3.63                         | 3.47                                  | 0.069                | 0.7                          | 3.17                          | 0.295  | 10.164 | 0.477                             | 8.045   | 9.856           | 10.136 | 10.478          | 11.554                  |         |
| CDC16    | 9e1S7KBliHwXwiHo2RE | rs9314909  | 5.68                         | 5.43                                  | -0.112               | 1.65                         | 4.87                          | 0.24   | 10.164 | 0.477                             | 8.045   | 9.856           | 10.136 | 10.478          | 11.554                  |         |
| CDC34    | W1U7e96v9G59lqieU   | rs2288953  | 3.63                         | 3.48                                  | 0.069                | 0.6                          | -3.09                         | 0.45   | 8.583  | 0.328                             | 7.448   | 8.39            | 8.542  | 8.754           | 10.273                  |         |
| CDC7     | uhJM0B9c6gAt66utJ4  | rs12058802 | 3.7                          | 3.54                                  | -0.068               | 1.42                         | -43.19                        | 0.4925 | 8.219  | 0.292                             | 7.417   | 8.019           | 8.203  | 8.388           | 9.059                   |         |
| CDC7     | uhJM0B9c6gAt66utJ4  | rs13447450 | 4.62                         | 4.42                                  | -0.089               | 1.83                         | -0.59                         | 0.345  | 8.219  | 0.292                             | 7.417   | 8.019           | 8.203  | 8.388           | 9.059                   |         |
| CDC7     | uhJM0B9c6gAt66utJ4  | rs12125947 | 5.76                         | 5.51                                  | 0.11                 | 2.29                         | -0.83                         | 0.48   | 8.219  | 0.292                             | 7.417   | 8.019           | 8.203  | 8.388           | 9.059                   |         |
| CDC7     | uhJM0B9c6gAt66utJ4  | rs625525   | 5.73                         | 5.48                                  | -0.11                | 2.33                         | 6.28                          | 0.4874 | 8.219  | 0.292                             | 7.417   | 8.019           | 8.203  | 8.388           | 9.059                   |         |
| CDC7     | uhJM0B9c6gAt66utJ4  | rs10493851 | 3.95                         | 3.79                                  | -0.076               | 1.76                         | 11.25                         | 0.2625 | 8.219  | 0.292                             | 7.417   | 8.019           | 8.203  | 8.388           | 9.059                   |         |
| CDC7     | uhJM0B9c6gAt66utJ4  | rs12134245 | 4.63                         | 4.43                                  | -0.091               | 2.1                          | 30.15                         | 0.4825 | 8.219  | 0.292                             | 7.417   | 8.019           | 8.203  | 8.388           | 9.059                   |         |
| CDC7     | uhJM0B9c6gAt66utJ4  | rs17501937 | 7.14                         | 6.82                                  | -0.14                | 4.02                         | 30.39                         | 0.4375 | 8.219  | 0.292                             | 7.417   | 8.019           | 8.203  | 8.388           | 9.059                   |         |
| CDC7     | uhJM0B9c6gAt66utJ4  | rs10874792 | 3.39                         | 3.25                                  | 0.063                | 2.81                         | 41.08                         | 0.4825 | 8.219  | 0.292                             | 7.417   | 8.019           | 8.203  | 8.388           | 9.059                   |         |
| CDC44    | 33_7VUeyKGuJZJ5NBc  | rs894039   | 3.91                         | 3.74                                  | 0.075                | 3.06                         | -15.21                        | 0.2    | 8.256  | 0.231                             | 7.462   | 8.128           | 8.266  | 8.406           | 8.889                   |         |
| CDC44    | 33_7VUeyKGuJZJ5NBc  | rs7157970  | 3.3                          | 3.16                                  | -0.063               | 2.85                         | -12.34                        | 0.325  | 8.256  | 0.231                             | 7.462   | 8.128           | 8.266  | 8.406           | 8.889                   |         |
| CDC44    | 33_7VUeyKGuJZJ5NBc  | rs3924892  | 5.52                         | 5.27                                  | -0.111               | 4.16                         | 6.77                          | 0.2925 | 8.256  | 0.231                             | 7.462   | 8.128           | 8.266  | 8.406           | 8.889                   |         |
| CDH23    | odS1C3ZxP1IE1d3noY  | rs16929266 | 3.43                         | 3.29                                  | -0.066               | 0.4                          | -88.53                        | 0.1425 | 9.048  | 0.463                             | 8.031   | 8.726           | 9.043  | 9.307           | 10.368                  |         |
| CDH23    | odS1C3ZxP1IE1d3noY  | rs720295   | 3.71                         | 3.55                                  | 0.068                | 1.16                         | 21.7                          | 0.4375 | 9.048  | 0.463                             | 8.031   | 8.726           | 9.043  | 9.307           | 10.368                  |         |
| CDH23    | odS1C3ZxP1IE1d3noY  | rs7899959  | 3.71                         | 3.55                                  | 0.068                | 0.89                         | 24.66                         | 0.4375 | 9.048  | 0.463                             | 8.031   | 8.726           | 9.043  | 9.307           | 10.368                  |         |
| CDK5R1   | KV0u4Je273dV_R600s  | rs9889352  | 8.61                         | 8.22                                  | -0.163               | 6.4                          | -38.34                        | 0.4184 | 8.936  | 0.459                             | 7.913   | 8.606           | 8.923  | 9.203           | 10.383                  |         |
| CDK5R1   | KV0u4Je273dV_R600s  | rs12162135 | 11.94                        | 11.39                                 | -0.227               | 6.42                         | -8.31                         | 0.4648 | 8.936  | 0.459                             | 7.913   | 8.606           | 8.923  | 9.203           | 10.383                  |         |
| CDK5R1   | KV0u4Je273dV_R600s  | rs756785   | 8.67                         | 8.27                                  | -0.161               | 5.98                         | -1.26                         | 0.415  | 8.936  | 0.459                             | 7.913   | 8.606           | 8.923  | 9.203           | 10.383                  |         |
| CDK5R1   | KV0u4Je273dV_R600s  | rs1018866  | 17.44                        | 16.63                                 | -0.325               | 9.33                         | 11.39                         | 0.435  | 8.936  | 0.459                             | 7.913   | 8.606           | 8.923  | 9.203           | 10.383                  |         |
| CDK5R1   | KV0u4Je273dV_R600s  | rs11655031 | 17.87                        | 17.03                                 | 0.331                | 9.51                         | 14.89                         | 0.4025 | 8.936  | 0.459                             | 7.913   | 8.606           | 8.923  | 9.203           | 10.383                  |         |
| CDK5R1   | KV0u4Je273dV_R600s  | rs2519866  | 3.48                         | 3.33                                  | 0.062                | 3.59                         | 17.5                          | 0.3207 | 8.936  | 0.459                             | 7.913   | 8.606           | 8.923  | 9.203           | 10.383                  |         |
| CDK5R1   | KV0u4Je273dV_R600s  | rs721466   | 23.39                        | 22.29                                 | 0.42                 | 9.52                         | 26.11                         | 0.43   | 8.936  | 0.459                             | 7.913   | 8.606           | 8.923  | 9.203           | 10.383                  |         |
| CDK5RAP2 | 3L4p7mX66n0bfVej_c  | rs10125592 | 18.46                        | 17.59                                 | -0.338               | 5.41                         | 10.59                         | 0.1225 | 9.631  | 0.438                             | 8.147   | 9.361           | 9.678  | 9.929           | 10.91                   |         |
| CDK5RAP2 | 3L4p7mX66n0bfVej_c  | rs3780674  | 17.41                        | 16.60                                 | -0.322               | 4.66                         | 15.77                         | 0.12   | 9.631  | 0.438                             | 8.147   | 9.361           | 9.678  | 9.929           | 10.91                   |         |
| CDK5RAP2 | 3L4p7mX66n0bfVej_c  | rs2297454  | 7.09                         | 6.78                                  | 0.143                | 3.54                         | 20.61                         | 0.245  | 9.631  | 0.438                             | 8.147   | 9.361           | 9.678  | 9.929           | 10.91                   |         |
| CDK5RAP2 | 3L4p7mX66n0bfVej_c  | rs10984922 | 5.32                         | 5.07                                  | -0.111               | 1.27                         | 83.28                         | 0.15   | 9.631  | 0.438                             | 8.147   | 9.361           | 9.678  | 9.929           | 10.91                   |         |
| CDKAL1   | iSUD98OKdVe3RPI_pU  | rs10946439 | 4.38                         | 4.19                                  | -0.09                | 1.25                         | 1.4                           | 0.18   | 7.975  | 0.257                             | 7.242   | 7.802           | 7.938  | 8.131           | 8.737                   |         |
| CDKL1    | o3zXleqdcCp7dROhXE  | rs2275591  | 4.27                         | 4.09                                  | 0.083                | 3.21                         | -17.9                         | 0.4275 | 7.242  | 0.062                             | 7.115   | 7.196           | 7.237  | 7.283           | 7.485                   |         |
| CDKL1    | o3zXleqdcCp7dROhXE  | rs12433794 | 4.29                         | 4.11                                  | 0.083                | 3.08                         | -10.72                        | 0.425  | 7.242  | 0.062                             | 7.115   | 7.196           | 7.237  | 7.283           | 7.485                   |         |
| CDKL1    | o3zXleqdcCp7dROhXE  | rs4901015  | 4.23                         | 4.04                                  | 0.082                | 3.31                         | 1.94                          | 0.43   | 7.242  | 0.062                             | 7.115   | 7.196           | 7.237  | 7.283           | 7.485                   |         |
| CDKL1    | o3zXleqdcCp7dROhXE  | rs1748089  | 4.23                         | 4.04                                  | 0.082                | 3.45                         | 6.01                          | 0.43   | 7.242  | 0.062                             | 7.115   | 7.196           | 7.237  | 7.283           | 7.485                   |         |
| CDKL1    | o3zXleqdcCp7dROhXE  | rs2356243  | 4.34                         | 4.15                                  | 0.084                | 3.41                         | 6.64                          | 0.4325 | 7.242  | 0.062                             | 7.115   | 7.196           | 7.237  | 7.283           | 7.485                   |         |

| Symbol   | Lumi nuID          | SNP        | Population-based | Population-based          | % Variance | Family-based     | Distance from   | MAF    | Mean      | Transcript abundance (log2 scale) |            |            |            |         | SNP mapping under probe |     |
|----------|--------------------|------------|------------------|---------------------------|------------|------------------|-----------------|--------|-----------|-----------------------------------|------------|------------|------------|---------|-------------------------|-----|
|          |                    |            | association      | association               |            | association      |                 |        |           | Standard                          | 25th       | Median     | 75th       | Maximum |                         |     |
|          |                    |            | p-value (-log10) | p-value (-log10), GC adj. | Explained  | p-value (-log10) | transcript (kb) |        | Deviation | Minimum                           | percentile | percentile | percentile | Maximum |                         |     |
| CDKL1    | o3zXleqdcCp7dROHXE | rs7151406  | 3.66             | 3.50                      | -0.07      | 3.16             | 10              | 0.435  | 7.242     | 0.062                             | 7.115      | 7.196      | 7.237      | 7.283   | 7.485                   |     |
| CDKL1    | o3zXleqdcCp7dROHXE | rs11157739 | 3.52             | 3.37                      | -0.069     | 1.72             | -29.36          | 0.3417 | 7.242     | 0.062                             | 7.115      | 7.196      | 7.237      | 7.283   | 7.485                   |     |
| CDKL1    | o3zXleqdcCp7dROHXE | rs4901022  | 3.63             | 3.48                      | 0.071      | 1.54             | -28.36          | 0.3425 | 7.242     | 0.062                             | 7.115      | 7.196      | 7.237      | 7.283   | 7.485                   |     |
| CDKN1A   | 6ijm72au7nm9Erv3mk | rs1321313  | 3.78             | 3.62                      | 0.076      | 0.55             | -27.67          | 0.1964 | 7.133     | 0.049                             | 7.097      | 7.113      | 7.121      | 7.135   | 7.458                   |     |
| CDKN1A   | 6ijm72au7nm9Erv3mk | rs1321311  | 3.6              | 3.45                      | -0.071     | 0.53             | -23.59          | 0.1925 | 7.133     | 0.049                             | 7.097      | 7.113      | 7.121      | 7.135   | 7.458                   |     |
| CDKN1A   | 6ijm72au7nm9Erv3mk | rs10807170 | 4.39             | 4.20                      | -0.09      | 1.6              | -17.04          | 0.325  | 7.133     | 0.049                             | 7.097      | 7.113      | 7.121      | 7.135   | 7.458                   |     |
| CDKN1A   | 6ijm72au7nm9Erv3mk | rs4713999  | 4.39             | 4.20                      | -0.09      | 1.47             | -13.42          | 0.325  | 7.133     | 0.049                             | 7.097      | 7.113      | 7.121      | 7.135   | 7.458                   |     |
| CDO1     | NkH2p2eiBBwqkUBXel | rs364208   | 5.32             | 5.09                      | 0.102      | 2.03             | -14.04          | 0.4625 | 7.286     | 0.213                             | 7.117      | 7.166      | 7.208      | 7.315   | 8.798                   | Yes |
| CDO1     | NkH2p2eiBBwqkUBXel | rs258737   | 8.78             | 8.39                      | 0.167      | 2.59             | -9.5            | 0.3662 | 7.286     | 0.213                             | 7.117      | 7.166      | 7.208      | 7.315   | 8.798                   | Yes |
| CDS2     | xeeDX96of3TakJlqc  | rs1470351  | 7.75             | 7.40                      | -0.152     | 4.37             | -22.28          | 0.47   | 8.707     | 0.188                             | 8.121      | 8.599      | 8.721      | 8.831   | 9.603                   |     |
| CDS2     | xeeDX96of3TakJlqc  | rs1470352  | 7.34             | 7.01                      | -0.144     | 3.86             | -22.21          | 0.4625 | 8.707     | 0.188                             | 8.121      | 8.599      | 8.721      | 8.831   | 9.603                   |     |
| CDS2     | xeeDX96of3TakJlqc  | rs6107589  | 7.31             | 6.98                      | 0.144      | 4.3              | -21.94          | 0.475  | 8.707     | 0.188                             | 8.121      | 8.599      | 8.721      | 8.831   | 9.603                   |     |
| CDS2     | xeeDX96of3TakJlqc  | rs6053183  | 5.53             | 5.29                      | 0.108      | 3.51             | -6.84           | 0.3825 | 8.707     | 0.188                             | 8.121      | 8.599      | 8.721      | 8.831   | 9.603                   |     |
| CDS2     | xeeDX96of3TakJlqc  | rs6053197  | 3.89             | 3.72                      | -0.073     | 2.97             | 11.36           | 0.3325 | 8.707     | 0.188                             | 8.121      | 8.599      | 8.721      | 8.831   | 9.603                   |     |
| CDS2     | xeeDX96of3TakJlqc  | rs1028549  | 5.21             | 4.98                      | 0.102      | 2.98             | 26.3            | 0.3825 | 8.707     | 0.188                             | 8.121      | 8.599      | 8.721      | 8.831   | 9.603                   |     |
| DEACAM21 | ZCo6q1eeDMylXQSHU  | rs3826716  | 3.88             | 3.71                      | 0.072      | 4.58             | -46.87          | 0.215  | 7.624     | 0.191                             | 7.166      | 7.483      | 7.633      | 7.746   | 8.278                   |     |
| DEACAM21 | ZCo6q1eeDMylXQSHU  | rs4802122  | 4.79             | 4.58                      | 0.09       | 5.34             | -34.66          | 0.195  | 7.624     | 0.191                             | 7.166      | 7.483      | 7.633      | 7.746   | 8.278                   |     |
| DEACAM21 | ZCo6q1eeDMylXQSHU  | rs7255742  | 6.63             | 6.33                      | 0.126      | 5.73             | -32.77          | 0.16   | 7.624     | 0.191                             | 7.166      | 7.483      | 7.633      | 7.746   | 8.278                   |     |
| DEACAM21 | ZCo6q1eeDMylXQSHU  | rs4803480  | 9.17             | 8.76                      | 0.176      | 4.58             | -16.31          | 0.1701 | 7.624     | 0.191                             | 7.166      | 7.483      | 7.633      | 7.746   | 8.278                   |     |
| DEACAM21 | ZCo6q1eeDMylXQSHU  | rs4803481  | 9.49             | 9.05                      | 0.181      | 6.78             | -16.03          | 0.2487 | 7.624     | 0.191                             | 7.166      | 7.483      | 7.633      | 7.746   | 8.278                   |     |
| DEACAM21 | ZCo6q1eeDMylXQSHU  | rs11882144 | 9.4              | 8.97                      | -0.177     | 5.46             | -9.98           | 0.18   | 7.624     | 0.191                             | 7.166      | 7.483      | 7.633      | 7.746   | 8.278                   |     |
| DEACAM21 | ZCo6q1eeDMylXQSHU  | rs2302188  | 11.15            | 10.63                     | 0.21       | 6.87             | 3.29            | 0.2375 | 7.624     | 0.191                             | 7.166      | 7.483      | 7.633      | 7.746   | 8.278                   |     |
| DEACAM21 | ZCo6q1eeDMylXQSHU  | rs1076362  | 3.4              | 3.26                      | -0.063     | 3                | -2.03           | 0.12   | 7.624     | 0.191                             | 7.166      | 7.483      | 7.633      | 7.746   | 8.278                   |     |
| DEACAM21 | ZCo6q1eeDMylXQSHU  | rs2191240  | 3.41             | 3.26                      | 0.061      | 2.13             | 10.3            | 0.1275 | 7.624     | 0.191                             | 7.166      | 7.483      | 7.633      | 7.746   | 8.278                   |     |
| DEACAM21 | ZCo6q1eeDMylXQSHU  | rs2191241  | 4.52             | 4.33                      | -0.084     | 3.3              | 10.36           | 0.15   | 7.624     | 0.191                             | 7.166      | 7.483      | 7.633      | 7.746   | 8.278                   |     |
| DEACAM21 | ZCo6q1eeDMylXQSHU  | rs4090570  | 3.79             | 3.62                      | -0.07      | 0.51             | 22.93           | 0.42   | 7.624     | 0.191                             | 7.166      | 7.483      | 7.633      | 7.746   | 8.278                   |     |
| DEACAM21 | ZCo6q1eeDMylXQSHU  | rs2215324  | 4.93             | 4.71                      | 0.092      | 1.2              | 27.09           | 0.4375 | 7.624     | 0.191                             | 7.166      | 7.483      | 7.633      | 7.746   | 8.278                   |     |
| DEACAM21 | ZCo6q1eeDMylXQSHU  | rs6508987  | 4.71             | 4.50                      | 0.087      | 1.52             | 27.58           | 0.4575 | 7.624     | 0.191                             | 7.166      | 7.483      | 7.633      | 7.746   | 8.278                   |     |
| DEACAM21 | ZCo6q1eeDMylXQSHU  | rs929502   | 4.31             | 4.12                      | -0.079     | 1.24             | 37.58           | 0.3825 | 7.624     | 0.191                             | 7.166      | 7.483      | 7.633      | 7.746   | 8.278                   |     |
| CELSR3   | HVJpXf17e7A_9bgimc | rs9834639  | 3.45             | 3.30                      | -0.063     | 1.69             | -14.89          | 0.0578 | 8.151     | 0.307                             | 7.347      | 7.936      | 8.142      | 8.331   | 9.164                   |     |
| CENPN    | Q9G111OeKZDEWferSg | rs16954368 | 3.63             | 3.47                      | -0.069     | 0.91             | -29.21          | 0.0503 | 7.955     | 0.239                             | 7.449      | 7.79       | 7.917      | 8.086   | 8.793                   |     |
| CENPN    | Q9G111OeKZDEWferSg | rs3743503  | 8.83             | 8.43                      | -0.173     | 2.38             | -0.04           | 0.12   | 7.955     | 0.239                             | 7.449      | 7.79       | 7.917      | 8.086   | 8.793                   |     |
| CENPN    | Q9G111OeKZDEWferSg | rs2602431  | 6.66             | 6.37                      | -0.13      | 2.44             | 14.22           | 0.1225 | 7.955     | 0.239                             | 7.449      | 7.79       | 7.917      | 8.086   | 8.793                   |     |
| CENPN    | Q9G111OeKZDEWferSg | rs16954505 | 4.32             | 4.13                      | -0.083     | 1.73             | 17.68           | 0.085  | 7.955     | 0.239                             | 7.449      | 7.79       | 7.917      | 8.086   | 8.793                   |     |
| CENPN    | Q9G111OeKZDEWferSg | rs2278022  | 6.37             | 6.09                      | -0.129     | 1.99             | 20.34           | 0.0631 | 7.955     | 0.239                             | 7.449      | 7.79       | 7.917      | 8.086   | 8.793                   |     |
| CENPN    | Q9G111OeKZDEWferSg | rs10459872 | 5.31             | 5.08                      | 0.105      | 2.39             | 38.47           | 0.085  | 7.955     | 0.239                             | 7.449      | 7.79       | 7.917      | 8.086   | 8.793                   |     |
| CENPP    | WtUSYleiehCBllMgHk | rs10119535 | 7.61             | 7.27                      | 0.146      | 2.35             | -43.51          | 0.24   | 7.201     | 0.074                             | 7.107      | 7.149      | 7.187      | 7.231   | 7.666                   |     |
| CENPP    | WtUSYleiehCBllMgHk | rs10739927 | 4.44             | 4.25                      | 0.083      | 1.95             | -35.66          | 0.37   | 7.201     | 0.074                             | 7.107      | 7.149      | 7.187      | 7.231   | 7.666                   |     |
| CENPP    | WtUSYleiehCBllMgHk | rs10992302 | 6.56             | 6.27                      | 0.127      | 2.46             | -6.66           | 0.09   | 7.201     | 0.074                             | 7.107      | 7.149      | 7.187      | 7.231   | 7.666                   |     |
| CENPP    | WtUSYleiehCBllMgHk | rs10992308 | 10.15            | 9.69                      | 0.197      | 3.06             | 9.07            | 0.201  | 7.201     | 0.074                             | 7.107      | 7.149      | 7.187      | 7.231   | 7.666                   |     |
| CENPP    | WtUSYleiehCBllMgHk | rs7023004  | 4.73             | 4.52                      | 0.089      | 1.66             | 10.97           | 0.3725 | 7.201     | 0.074                             | 7.107      | 7.149      | 7.187      | 7.231   | 7.666                   |     |
| CENPP    | WtUSYleiehCBllMgHk | rs7869742  | 4.5              | 4.31                      | 0.084      | 1.8              | -121.27         | 0.3875 | 7.201     | 0.074                             | 7.107      | 7.149      | 7.187      | 7.231   | 7.666                   |     |
| CENPP    | WtUSYleiehCBllMgHk | rs10514815 | 5.86             | 5.60                      | -0.112     | 2.44             | -120.75         | 0.35   | 7.201     | 0.074                             | 7.107      | 7.149      | 7.187      | 7.231   | 7.666                   |     |
| CENPP    | WtUSYleiehCBllMgHk | rs2895219  | 6.6              | 6.31                      | -0.128     | 3.03             | -76.89          | 0.365  | 7.201     | 0.074                             | 7.107      | 7.149      | 7.187      | 7.231   | 7.666                   |     |
| CENPP    | WtUSYleiehCBllMgHk | rs10820995 | 9.27             | 8.85                      | 0.179      | 2.79             | -21.73          | 0.215  | 7.201     | 0.074                             | 7.107      | 7.149      | 7.187      | 7.231   | 7.666                   |     |
| CENPQ    | iDp8S.e3rTegfgA10  | rs6458687  | 5.01             | 4.79                      | 0.1        | 2.11             | -27.81          | 0.4    | 7.57      | 0.254                             | 7.117      | 7.381      | 7.533      | 7.711   | 8.383                   |     |
| CENPQ    | iDp8S.e3rTegfgA10  | rs2501968  | 5.33             | 5.10                      | 0.106      | 2.23             | -0.84           | 0.4375 | 7.57      | 0.254                             | 7.117      | 7.381      | 7.533      | 7.711   | 8.383                   |     |
| CENPQ    | iDp8S.e3rTegfgA10  | rs13220023 | 3.6              | 3.45                      | -0.07      | 3.39             | 14.51           | 0.1575 | 7.57      | 0.254                             | 7.117      | 7.381      | 7.533      | 7.711   | 8.383                   |     |
| CEP192   | 0VJPE0E5W5L0BYLWSK | rs3976787  | 3.69             | 3.53                      | -0.071     | 2.19             | -36.6           | 0.4    | 9.752     | 0.33                              | 8.668      | 9.564      | 9.749      | 9.949   | 10.698                  | Yes |
| CEP192   | 0VJPE0E5W5L0BYLWSK | rs8090667  | 3.69             | 3.53                      | -0.071     | 2.18             | -34.43          | 0.4    | 9.752     | 0.33                              | 8.668      | 9.564      | 9.749      | 9.949   | 10.698                  | Yes |
| CEP192   | 0VJPE0E5W5L0BYLWSK | rs8088313  | 7.67             | 7.33                      | -0.154     | 3.83             | -31.29          | 0.385  | 9.752     | 0.33                              | 8.668      | 9.564      | 9.749      | 9.949   | 10.698                  | Yes |
| CEP192   | 0VJPE0E5W5L0BYLWSK | rs6505776  | 7.67             | 7.33                      | 0.154      | 3.82             | -24.36          | 0.385  | 9.752     | 0.33                              | 8.668      | 9.564      | 9.749      | 9.949   | 10.698                  | Yes |
| CEP192   | 0VJPE0E5W5L0BYLWSK | rs7234960  | 7.9              | 7.54                      | -0.157     | 3.94             | 9.57            | 0.39   | 9.752     | 0.33                              | 8.668      | 9.564      | 9.749      | 9.949   | 10.698                  | Yes |
| CEP192   | 0VJPE0E5W5L0BYLWSK | rs10221384 | 6.34             | 6.05                      | 0.126      | 2.79             | 27.33           | 0.415  | 9.752     | 0.33                              | 8.668      | 9.564      | 9.749      | 9.949   | 10.698                  | Yes |
| CEP192   | 0VJPE0E5W5L0BYLWSK | rs570505   | 7.55             | 7.21                      | 0.151      | 3.28             | 39.28           | 0.39   | 9.752     | 0.33                              | 8.668      | 9.564      | 9.749      | 9.949   | 10.698                  | Yes |
| CEP192   | 0VJPE0E5W5L0BYLWSK | rs472702   | 5.93             | 5.67                      | 0.119      | 2.39             | 49.99           | 0.4146 | 9.752     | 0.33                              | 8.668      | 9.564      | 9.749      | 9.949   | 10.698                  | Yes |
| CEP192   | 0VJPE0E5W5L0BYLWSK | rs578208   | 7.19             | 6.87                      | 0.144      | 3.43             | -56.92          | 0.3925 | 9.752     | 0.33                              | 8.668      | 9.564      | 9.749      | 9.949   | 10.698                  | Yes |
| CEP192   | 0VJPE0E5W5L0BYLWSK | rs6505780  | 7.55             | 7.21                      | -0.151     | 3.28             | -55.27          | 0.39   | 9.752     | 0.33                              | 8.668      | 9.564      | 9.749      | 9.949   | 10.698                  | Yes |
| CEP192   | 0VJPE0E5W5L0BYLWSK | rs527839   | 7.22             | 6.89                      | 0.144      | 3.21             | -37.24          | 0.395  | 9.752     | 0.33                              | 8.668      | 9.564      | 9.749      | 9.949   | 10.698                  | Yes |
| CEP192   | 0VJPE0E5W5L0BYLWSK | rs571002   | 3.97             | 3.80                      | 0.077      | 2.62             | -34.38          | 0.43   | 9.752     | 0.33                              | 8.668      | 9.564      | 9.749      | 9.949   | 10.698                  | Yes |
| CEP192   | 0VJPE0E5W5L0BYLWSK | rs474337   | 7.55             | 7.21                      | 0.151      | 3.28             | -29.44          | 0.39   | 9.752     | 0.33                              | 8.668      | 9.564      | 9.749      | 9.949   | 10.698                  | Yes |
| CEP192   | 0VJPE0E5W5L0BYLWSK | rs1786263  | 7.53             | 7.19                      | -0.151     | 3.21             | -8.62           | 0.3875 | 9.752     | 0.33                              | 8.668      | 9.564      | 9.749      | 9.949   | 10.698                  | Yes |

| Symbol | Lumi nuID           | SNP        | Population-based             | Population-based                      | % Variance Explained | Family-based                 | Distance from transcript (kb) | MAF    | Mean   | Transcript abundance (log2 scale) |         |                 |        |                 | SNP mapping under probe |
|--------|---------------------|------------|------------------------------|---------------------------------------|----------------------|------------------------------|-------------------------------|--------|--------|-----------------------------------|---------|-----------------|--------|-----------------|-------------------------|
|        |                     |            | association p-value (-log10) | association p-value (-log10), GC adj. |                      | association p-value (-log10) |                               |        |        | Standard Deviation                | Minimum | 25th percentile | Median | 75th percentile |                         |
| CERK   | iXnqcafcacoTTQoS4gg | rs710123   | 3.3                          | 3.16                                  | 0.064                | 2.01                         | 11.13                         | 0.4025 | 7.361  | 0.122                             | 7.152   | 7.272           | 7.336  | 7.423           | 7.898                   |
| CERK   | iXnqcafcacoTTQoS4gg | rs5769136  | 3.5                          | 3.35                                  | 0.069                | 1.43                         | 22.55                         | 0.3525 | 7.361  | 0.122                             | 7.152   | 7.272           | 7.336  | 7.423           | 7.898                   |
| CERK   | iXnqcafcacoTTQoS4gg | rs801643   | 3.56                         | 3.41                                  | -0.071               | 1.66                         | 22.99                         | 0.3794 | 7.361  | 0.122                             | 7.152   | 7.272           | 7.336  | 7.423           | 7.898                   |
| CFD    | NkEC1YkOC01HXk3r60  | rs1651895  | 5.36                         | 5.13                                  | -0.104               | 1.16                         | 2.39                          | 0.2475 | 10.061 | 1.238                             | 7.86    | 9.009           | 9.988  | 11.18           | 13.489                  |
| CFD    | NkEC1YkOC01HXk3r60  | rs13090    | 4.88                         | 4.66                                  | 0.093                | 1.26                         | 4.49                          | 0.28   | 10.061 | 1.238                             | 7.86    | 9.009           | 9.988  | 11.18           | 13.489                  |
| CFD    | NkEC1YkOC01HXk3r60  | rs1683591  | 5.71                         | 5.45                                  | 0.109                | 1.21                         | 5.41                          | 0.2825 | 10.061 | 1.238                             | 7.86    | 9.009           | 9.988  | 11.18           | 13.489                  |
| CFD    | NkEC1YkOC01HXk3r60  | rs2965292  | 5.85                         | 5.59                                  | 0.113                | 1.16                         | 27.22                         | 0.2487 | 10.061 | 1.238                             | 7.86    | 9.009           | 9.988  | 11.18           | 13.489                  |
| CFDP1  | BeoifQoolqj64IHpTU  | rs247427   | 3.3                          | 3.16                                  | -0.064               | 0.06                         | -28.25                        | 0.15   | 9.104  | 0.285                             | 8.184   | 8.972           | 9.131  | 9.286           | 9.809                   |
| CHI3L2 | ouJEVE.0eU83qEkgUo  | rs684559   | 5.02                         | 4.80                                  | -0.098               | 2.12                         | -13.89                        | 0.3625 | 7.372  | 0.234                             | 7.1     | 7.205           | 7.311  | 7.487           | 8.454                   |
| CHI3L2 | HXxXftQkCIJfp1e4I   | rs684559   | 4.94                         | 4.72                                  | -0.099               | 3.13                         | -11.84                        | 0.3625 | 9.007  | 0.527                             | 7.7     | 8.573           | 8.983  | 9.37            | 10.531                  |
| CHI3L2 | ouJEVE.0eU83qEkgUo  | rs755467   | 4.67                         | 4.47                                  | -0.09                | 0.9                          | -1.91                         | 0.295  | 7.372  | 0.234                             | 7.1     | 7.205           | 7.311  | 7.487           | 8.454                   |
| CHI3L2 | HXxXftQkCIJfp1e4I   | rs755467   | 4.06                         | 3.88                                  | -0.079               | 0.96                         | 0.14                          | 0.295  | 9.007  | 0.527                             | 7.7     | 8.573           | 8.983  | 9.37            | 10.531                  |
| CHI3L2 | HXxXftQkCIJfp1e4I   | rs2274232  | 7.71                         | 7.36                                  | -0.16                | 2.24                         | 3.32                          | 0.085  | 9.007  | 0.527                             | 7.7     | 8.573           | 8.983  | 9.37            | 10.531                  |
| CHI3L2 | HXxXftQkCIJfp1e4I   | rs2764543  | 6.43                         | 6.14                                  | -0.13                | 3.13                         | -6.96                         | 0.33   | 9.007  | 0.527                             | 7.7     | 8.573           | 8.983  | 9.37            | 10.531                  |
| CHI3L2 | ouJEVE.0eU83qEkgUo  | rs2764543  | 4.38                         | 4.19                                  | -0.085               | 1.24                         | 6.76                          | 0.33   | 7.372  | 0.234                             | 7.1     | 7.205           | 7.311  | 7.487           | 8.454                   |
| CHI3L2 | HXxXftQkCIJfp1e4I   | rs17699274 | 7.46                         | 7.12                                  | -0.154               | 2.8                          | 3.55                          | 0.4675 | 9.007  | 0.527                             | 7.7     | 8.573           | 8.983  | 9.37            | 10.531                  |
| CHI3L2 | ouJEVE.0eU83qEkgUo  | rs17699274 | 5.74                         | 5.48                                  | -0.114               | 3.06                         | 3.55                          | 0.4675 | 7.372  | 0.234                             | 7.1     | 7.205           | 7.311  | 7.487           | 8.454                   |
| CHI3L2 | HXxXftQkCIJfp1e4I   | rs4839109  | 11.13                        | 10.62                                 | 0.227                | 3.89                         | 9.62                          | 0.4925 | 9.007  | 0.527                             | 7.7     | 8.573           | 8.983  | 9.37            | 10.531                  |
| CHI3L2 | ouJEVE.0eU83qEkgUo  | rs4839109  | 9.74                         | 9.29                                  | 0.195                | 4.19                         | 9.62                          | 0.4925 | 7.372  | 0.234                             | 7.1     | 7.205           | 7.311  | 7.487           | 8.454                   |
| CHI3L2 | HXxXftQkCIJfp1e4I   | rs4323713  | 3.86                         | 3.70                                  | 0.076                | 2.65                         | 37.16                         | 0.255  | 9.007  | 0.527                             | 7.7     | 8.573           | 8.983  | 9.37            | 10.531                  |
| CHI3L2 | ouJEVE.0eU83qEkgUo  | rs4323713  | 3.56                         | 3.46                                  | 0.068                | 2.5                          | 37.16                         | 0.255  | 7.372  | 0.234                             | 7.1     | 7.205           | 7.311  | 7.487           | 8.454                   |
| CHN1   | ikWXebXqy3ufsNSTv0  | rs2244340  | 3.51                         | 3.31                                  | -0.068               | 1.61                         | -22.52                        | 0.402  | 8.052  | 0.327                             | 7.311   | 7.807           | 8.019  | 8.262           | 9.019                   |
| CHN1   | ikWXebXqy3ufsNSTv0  | rs10930689 | 8.86                         | 8.45                                  | 0.165                | 2.73                         | 70.4                          | 0.392  | 8.052  | 0.327                             | 7.311   | 7.807           | 8.019  | 8.262           | 9.019                   |
| CHN1   | ikWXebXqy3ufsNSTv0  | rs9789395  | 8.91                         | 8.50                                  | 0.165                | 2.21                         | 73.97                         | 0.3925 | 8.052  | 0.327                             | 7.311   | 7.807           | 8.019  | 8.262           | 9.019                   |
| CHN1   | ikWXebXqy3ufsNSTv0  | rs1378729  | 6.06                         | 5.79                                  | 0.111                | 2.27                         | 80.5                          | 0.4125 | 8.052  | 0.327                             | 7.311   | 7.807           | 8.019  | 8.262           | 9.019                   |
| CHN1   | ikWXebXqy3ufsNSTv0  | rs3771910  | 5.57                         | 5.33                                  | 0.104                | 2.58                         | 83.38                         | 0.3725 | 8.052  | 0.327                             | 7.311   | 7.807           | 8.019  | 8.262           | 9.019                   |
| CHN1   | ikWXebXqy3ufsNSTv0  | rs1193629  | 6.08                         | 5.83                                  | -0.113               | 2.31                         | -63.4                         | 0.3945 | 8.052  | 0.327                             | 7.311   | 7.807           | 8.019  | 8.262           | 9.019                   |
| CHN1   | ikWXebXqy3ufsNSTv0  | rs3856435  | 9.83                         | 9.39                                  | 0.184                | 2.49                         | 23.16                         | 0.3725 | 8.052  | 0.327                             | 7.311   | 7.807           | 8.019  | 8.262           | 9.019                   |
| CHN1   | ikWXebXqy3ufsNSTv0  | rs3886691  | 4.37                         | 4.18                                  | 0.084                | 2.49                         | 31.23                         | 0.3    | 8.052  | 0.327                             | 7.311   | 7.807           | 8.019  | 8.262           | 9.019                   |
| CHPT1  | Bo1HMkpFLt_OXodRMo  | rs11110928 | 9.86                         | 9.41                                  | -0.184               | 3                            | -42.33                        | 0.3071 | 8.715  | 0.463                             | 7.437   | 8.453           | 8.741  | 8.967           | 10.403                  |
| CHPT1  | Bo1HMkpFLt_OXodRMo  | rs11110932 | 10.05                        | 9.59                                  | 0.188                | 2.58                         | -41.24                        | 0.31   | 8.715  | 0.463                             | 7.437   | 8.453           | 8.741  | 8.967           | 10.403                  |
| CHPT1  | Bo1HMkpFLt_OXodRMo  | rs10778137 | 10.03                        | 9.58                                  | 0.19                 | 2.35                         | -19.9                         | 0.3266 | 8.715  | 0.463                             | 7.437   | 8.453           | 8.741  | 8.967           | 10.403                  |
| CHPT1  | Bo1HMkpFLt_OXodRMo  | rs1263783  | 5.51                         | 5.27                                  | 0.103                | 3.4                          | -19.7                         | 0.47   | 8.715  | 0.463                             | 7.437   | 8.453           | 8.741  | 8.967           | 10.403                  |
| CHPT1  | Bo1HMkpFLt_OXodRMo  | rs2241553  | 5.45                         | 5.21                                  | 0.101                | 1.56                         | -11.44                        | 0.3375 | 8.715  | 0.463                             | 7.437   | 8.453           | 8.741  | 8.967           | 10.403                  |
| CHPT1  | Bo1HMkpFLt_OXodRMo  | rs2695290  | 19.38                        | 18.47                                 | -0.349               | 3.18                         | -3.57                         | 0.4725 | 8.715  | 0.463                             | 7.437   | 8.453           | 8.741  | 8.967           | 10.403                  |
| CHPT1  | Bo1HMkpFLt_OXodRMo  | rs2695284  | 19.91                        | 18.98                                 | -0.359               | 3.36                         | -2.1                          | 0.4774 | 8.715  | 0.463                             | 7.437   | 8.453           | 8.741  | 8.967           | 10.403                  |
| CHPT1  | Bo1HMkpFLt_OXodRMo  | rs1124605  | 13.62                        | 12.98                                 | -0.257               | 1.71                         | 2.34                          | 0.2875 | 8.715  | 0.463                             | 7.437   | 8.453           | 8.741  | 8.967           | 10.403                  |
| CHPT1  | Bo1HMkpFLt_OXodRMo  | rs1073084  | 3.71                         | 3.55                                  | -0.071               | 0.55                         | 3.76                          | 0.4625 | 8.715  | 0.463                             | 7.437   | 8.453           | 8.741  | 8.967           | 10.403                  |
| CHRNA5 | 05Tpl.rWQjP30Rn1QE  | rs12915366 | 7.33                         | 7.00                                  | -0.15                | 3.23                         | -26.15                        | 0.4225 | 7.172  | 0.046                             | 7.111   | 7.142           | 7.16   | 7.184           | 7.406                   |
| CHRNA5 | 05Tpl.rWQjP30Rn1QE  | rs2292117  | 7.49                         | 7.15                                  | -0.154               | 3.3                          | -23.22                        | 0.4275 | 7.172  | 0.046                             | 7.111   | 7.142           | 7.16   | 7.184           | 7.406                   |
| CHRNA5 | 05Tpl.rWQjP30Rn1QE  | rs6495306  | 4.85                         | 4.63                                  | 0.097                | 2.77                         | 7.99                          | 0.4264 | 7.172  | 0.046                             | 7.111   | 7.142           | 7.16   | 7.184           | 7.406                   |
| CHRNA5 | 05Tpl.rWQjP30Rn1QE  | rs680244   | 4.68                         | 4.48                                  | 0.092                | 2.81                         | 13.38                         | 0.43   | 7.172  | 0.046                             | 7.111   | 7.142           | 7.16   | 7.184           | 7.406                   |
| CHRNA5 | 05Tpl.rWQjP30Rn1QE  | rs621849   | 4.98                         | 4.76                                  | 0.101                | 3.01                         | -13.6                         | 0.425  | 7.172  | 0.046                             | 7.111   | 7.142           | 7.16   | 7.184           | 7.406                   |
| CHRNA5 | 05Tpl.rWQjP30Rn1QE  | rs3743077  | 5.06                         | 4.84                                  | 0.103                | 2.84                         | 8.44                          | 0.4171 | 7.172  | 0.046                             | 7.111   | 7.142           | 7.16   | 7.184           | 7.406                   |
| CHRNA5 | 05Tpl.rWQjP30Rn1QE  | rs3743075  | 4.96                         | 4.74                                  | 0.098                | 3.39                         | 22.99                         | 0.3945 | 7.172  | 0.046                             | 7.111   | 7.142           | 7.16   | 7.184           | 7.406                   |
| CHRNA5 | 05Tpl.rWQjP30Rn1QE  | rs1948     | 3.5                          | 3.35                                  | -0.069               | 2.29                         | 30.94                         | 0.3543 | 7.172  | 0.046                             | 7.111   | 7.142           | 7.16   | 7.184           | 7.406                   |
| CHST13 | TSJV65DmtEr.Oof64k  | rs16837531 | 4.85                         | 4.64                                  | -0.089               | 1.76                         | -15.99                        | 0.3675 | 7.845  | 0.704                             | 7.105   | 7.307           | 7.633  | 8.16            | 10.469                  |
| CHST13 | TSJV65DmtEr.Oof64k  | rs1873388  | 4.81                         | 4.60                                  | 0.088                | 1.79                         | -14.22                        | 0.335  | 7.845  | 0.704                             | 7.105   | 7.307           | 7.633  | 8.16            | 10.469                  |
| CHST13 | TSJV65DmtEr.Oof64k  | rs6783962  | 5.65                         | 5.40                                  | 0.103                | 2.27                         | -5.46                         | 0.3575 | 7.845  | 0.704                             | 7.105   | 7.307           | 7.633  | 8.16            | 10.469                  |
| CHST13 | TSJV65DmtEr.Oof64k  | rs1056522  | 4.3                          | 4.12                                  | 0.078                | 2.27                         | -0.79                         | 0.3    | 7.845  | 0.704                             | 7.105   | 7.307           | 7.633  | 8.16            | 10.469                  |
| CHST13 | TSJV65DmtEr.Oof64k  | rs10934779 | 6.11                         | 5.84                                  | -0.114               | 1.97                         | 11.34                         | 0.4066 | 7.845  | 0.704                             | 7.105   | 7.307           | 7.633  | 8.16            | 10.469                  |
| CHST13 | TSJV65DmtEr.Oof64k  | rs7617257  | 4.94                         | 4.72                                  | -0.09                | 1.82                         | 20.95                         | 0.43   | 7.845  | 0.704                             | 7.105   | 7.307           | 7.633  | 8.16            | 10.469                  |
| CHURC1 | 6ITzJd4PtX1_L_cOfU  | rs2828     | 7.86                         | 7.51                                  | 0.157                | 3.82                         | -45.09                        | 0.295  | 11.247 | 0.752                             | 9.275   | 10.697          | 10.949 | 12.015          | 12.977                  |
| CHURC1 | 6ITzJd4PtX1_L_cOfU  | rs1957425  | 34.71                        | 33.06                                 | -0.58                | 9.38                         | -22.56                        | 0.2448 | 11.247 | 0.752                             | 9.275   | 10.697          | 10.949 | 12.015          | 12.977                  |
| CHURC1 | 6ITzJd4PtX1_L_cOfU  | rs1951488  | 36.05                        | 34.32                                 | 0.592                | 9.49                         | -8.93                         | 0.2475 | 11.247 | 0.752                             | 9.275   | 10.697          | 10.949 | 12.015          | 12.977                  |
| CHURC1 | 6ITzJd4PtX1_L_cOfU  | rs7143432  | 58.42                        | 55.60                                 | 0.791                | 12.44                        | -1.99                         | 0.2025 | 11.247 | 0.752                             | 9.275   | 10.697          | 10.949 | 12.015          | 12.977                  |
| CHURC1 | 6ITzJd4PtX1_L_cOfU  | rs4902336  | 56.67                        | 53.94                                 | 0.78                 | 12.64                        | 6.12                          | 0.205  | 11.247 | 0.752                             | 9.275   | 10.697          | 10.949 | 12.015          | 12.977                  |
| CHURC1 | 6ITzJd4PtX1_L_cOfU  | rs10138506 | 5.85                         | 5.59                                  | 0.12                 | 2.15                         | 7.1                           | 0.0575 | 11.247 | 0.752                             | 9.275   | 10.697          | 10.949 | 12.015          | 12.977                  |
| CHURC1 | 6ITzJd4PtX1_L_cOfU  | rs1064108  | 25.96                        | 24.73                                 | 0.465                | 8.31                         | -1.65                         | 0.2925 | 11.247 | 0.752                             | 9.275   | 10.697          | 10.949 | 12.015          | 12.977                  |
| CHURC1 | 6ITzJd4PtX1_L_cOfU  | rs11623705 | 36.24                        | 34.51                                 | 0.581                | 8.36                         | 3.81                          | 0.135  | 11.247 | 0.752                             | 9.275   | 10.697          | 10.949 | 12.015          | 12.977                  |
| CHURC1 | 6ITzJd4PtX1_L_cOfU  | rs2296327  | 13.58                        | 12.95                                 | 0.268                | 5.19                         | 8.63                          | 0.2462 | 11.247 | 0.752                             | 9.275   | 10.697          | 10.949 | 12.015          | 12.977                  |
| CHURC1 | 6ITzJd4PtX1_L_cOfU  | rs3742599  | 46.43                        | 44.20                                 | -0.686               | 10.85                        | 9.99                          | 0.175  | 11.247 | 0.752                             | 9.275   | 10.697          | 10.949 | 12.015          | 12.977                  |

| Symbol  | Lumi nuID          | SNP                | Population-based association |                           |                      | Family-based association |                               |        | Transcript abundance (log2 scale) |                    |         |                 |        |                 | SNP mapping under probe |         |
|---------|--------------------|--------------------|------------------------------|---------------------------|----------------------|--------------------------|-------------------------------|--------|-----------------------------------|--------------------|---------|-----------------|--------|-----------------|-------------------------|---------|
|         |                    |                    | p-value (-log10)             | p-value (-log10), GC adj. | % Variance Explained | p-value (-log10)         | Distance from transcript (kb) | MAF    | Mean                              | Standard Deviation | Minimum | 25th percentile | Median | 75th percentile |                         | Maximum |
| CHURC1  | 6ITzJd4PX1_L_cOfU  | rs2277501          | 16.63                        | 15.86                     | -0.324               | 8.32                     | 10.53                         | 0.3426 | 11.247                            | 0.752              | 9.275   | 10.697          | 10.949 | 12.015          | 12.977                  |         |
| CHURC1  | 6ITzJd4PX1_L_cOfU  | rs3759681          | 20.5                         | 19.54                     | -0.383               | 7.92                     | 11.69                         | 0.2725 | 11.247                            | 0.752              | 9.275   | 10.697          | 10.949 | 12.015          | 12.977                  |         |
| CHURC1  | 6ITzJd4PX1_L_cOfU  | rs11846925         | 7.7                          | 7.35                      | -0.159               | 4.69                     | 33.96                         | 0.4125 | 11.247                            | 0.752              | 9.275   | 10.697          | 10.949 | 12.015          | 12.977                  |         |
| CHURC1  | 6ITzJd4PX1_L_cOfU  | rs4499147          | 8.3                          | 7.93                      | 0.17                 | 5.07                     | 39.65                         | 0.4225 | 11.247                            | 0.752              | 9.275   | 10.697          | 10.949 | 12.015          | 12.977                  |         |
| CHURC1  | 6ITzJd4PX1_L_cOfU  | rs7160073          | 5.04                         | 4.82                      | 0.099                | 3.16                     | 48.72                         | 0.365  | 11.247                            | 0.752              | 9.275   | 10.697          | 10.949 | 12.015          | 12.977                  |         |
|         | CIB1               | o4SSVSbu16RXtQgX9w | 3.5                          | 3.36                      | -0.065               | 0.05                     | -0.34                         | 0.4296 | 11.468                            | 0.43               | 10.559  | 11.13           | 11.502 | 11.771          | 12.548                  | Yes     |
|         | CIB1               | o4SSVSbu16RXtQgX9w | 3.76                         | 3.60                      | 0.071                | 1.61                     | 29.38                         | 0.2025 | 11.468                            | 0.43               | 10.559  | 11.13           | 11.502 | 11.771          | 12.548                  | Yes     |
|         | CKAP2              | Nfm1foeXvj46Au3keE | 7.19                         | 6.87                      | 0.136                | 1.03                     | -36.18                        | 0.4275 | 8.164                             | 0.188              | 7.227   | 8.071           | 8.178  | 8.288           | 8.599                   |         |
|         | CKAP2              | Nfm1foeXvj46Au3keE | 3.71                         | 3.55                      | -0.069               | 0.34                     | -30.9                         | 0.3325 | 8.164                             | 0.188              | 7.227   | 8.071           | 8.178  | 8.288           | 8.599                   |         |
|         | CKAP2              | Nfm1foeXvj46Au3keE | 6.07                         | 5.80                      | -0.116               | 0.96                     | -7.08                         | 0.3894 | 8.164                             | 0.188              | 7.227   | 8.071           | 8.178  | 8.288           | 8.599                   |         |
|         | CKAP2              | Nfm1foeXvj46Au3keE | 7.03                         | 6.71                      | 0.133                | 0.99                     | 0.97                          | 0.43   | 8.164                             | 0.188              | 7.227   | 8.071           | 8.178  | 8.288           | 8.599                   |         |
|         | CKB                | EA4JWIRFYRSV559cHw | 3.66                         | 3.51                      | -0.071               | 2.1                      | 29.29                         | 0.4548 | 7.217                             | 0.126              | 7.108   | 7.151           | 7.186  | 7.235           | 7.94                    |         |
|         | CKB                | EA4JWIRFYRSV559cHw | 3.41                         | 3.26                      | -0.066               | 1.29                     | 31.28                         | 0.3375 | 7.217                             | 0.126              | 7.108   | 7.151           | 7.186  | 7.235           | 7.94                    |         |
| CLEC12A | NIRCIh8Q7oHy3f1dHU | rs592206           | 3.86                         | 3.69                      | 0.071                | 0.83                     | 2.41                          | 0.47   | 7.196                             | 0.127              | 7.099   | 7.123           | 7.146  | 7.217           | 7.879                   |         |
| CLEC12A | urpOnvTdq1Ncx9TqHU | rs592206           | 3.69                         | 3.63                      | 0.068                | 0.87                     | 2.41                          | 0.47   | 9.172                             | 1.126              | 7.174   | 8.376           | 8.999  | 9.981           | 12.575                  |         |
| CLEC12A | NIRCIh8Q7oHy3f1dHU | rs7313235          | 3.39                         | 3.25                      | 0.062                | 0.5                      | -5.91                         | 0.265  | 7.196                             | 0.127              | 7.099   | 7.123           | 7.146  | 7.217           | 7.879                   |         |
| CLEC12B | ZrvnHleKv1KLLHOE04 | rs1979592          | 3.53                         | 3.38                      | 0.068                | 1.62                     | 6.45                          | 0.1775 | 7.193                             | 0.076              | 7.113   | 7.144           | 7.167  | 7.214           | 7.565                   |         |
| CLEC1B  | uSC2Di6C6ijp2vNog  | rs10505743         | 3.87                         | 3.71                      | 0.073                | 1.06                     | 1.15                          | 0.1025 | 7.523                             | 0.531              | 7.097   | 7.159           | 7.294  | 7.737           | 10.07                   |         |
| CLEC2B  | oEqyEpSqACkdKkRJPk | rs253156           | 12.59                        | 12.01                     | 0.238                | 5.11                     | 1.45                          | 0.3939 | 9.851                             | 0.505              | 8.383   | 9.527           | 9.871  | 10.154          | 11.063                  |         |
| CLEC2B  | oEqyEpSqACkdKkRJPk | rs12305497         | 7.64                         | 7.30                      | -0.153               | 2.46                     | 2.4                           | 0.2487 | 9.851                             | 0.505              | 8.383   | 9.527           | 9.871  | 10.154          | 11.063                  |         |
| CLEC2B  | oEqyEpSqACkdKkRJPk | rs7957621          | 21.7                         | 20.68                     | -0.392               | 6.61                     | 2.79                          | 0.48   | 9.851                             | 0.505              | 8.383   | 9.527           | 9.871  | 10.154          | 11.063                  |         |
| CLEC2B  | oEqyEpSqACkdKkRJPk | rs11833550         | 5.77                         | 5.51                      | 0.114                | 1.17                     | 3.71                          | 0.1475 | 9.851                             | 0.505              | 8.383   | 9.527           | 9.871  | 10.154          | 11.063                  |         |
| CLEC2B  | oEqyEpSqACkdKkRJPk | rs2268141          | 8.54                         | 8.15                      | -0.163               | 2.89                     | 4.66                          | 0.3325 | 9.851                             | 0.505              | 8.383   | 9.527           | 9.871  | 10.154          | 11.063                  |         |
| CLEC2B  | oEqyEpSqACkdKkRJPk | rs1597097          | 21.01                        | 20.02                     | -0.382               | 7.36                     | -2.19                         | 0.4422 | 9.851                             | 0.505              | 8.383   | 9.527           | 9.871  | 10.154          | 11.063                  |         |
| CLEC4F  | WJd4nefv6hfW_I_6E  | rs1548888          | 6.85                         | 6.54                      | 0.122                | 2.99                     | 1.79                          | 0.33   | 7.173                             | 0.17               | 7.098   | 7.113           | 7.123  | 7.153           | 8.775                   |         |
| CLEC4F  | WJd4nefv6hfW_I_6E  | rs13015305         | 6.84                         | 6.53                      | -0.122               | 2.71                     | 5.68                          | 0.3392 | 7.173                             | 0.17               | 7.098   | 7.113           | 7.123  | 7.153           | 8.775                   |         |
| CLEC4F  | WJd4nefv6hfW_I_6E  | rs10206319         | 4.65                         | 4.44                      | 0.078                | 2.96                     | 8.37                          | 0.3    | 7.173                             | 0.17               | 7.098   | 7.113           | 7.123  | 7.153           | 8.775                   |         |
| CLECL1  | iZ4TQB72h9VvIHZv1E | rs3764021          | 9.4                          | 8.98                      | -0.182               | 2.14                     | -41.46                        | 0.48   | 7.767                             | 0.341              | 7.118   | 7.538           | 7.72   | 7.981           | 9.073                   |         |
| CLECL1  | iZ4TQB72h9VvIHZv1E | rs1044771          | 5.25                         | 5.02                      | -0.102               | 1.31                     | -23.16                        | 0.425  | 7.767                             | 0.341              | 7.118   | 7.538           | 7.72   | 7.981           | 9.073                   |         |
| CLECL1  | iZ4TQB72h9VvIHZv1E | rs11052552         | 7.11                         | 6.79                      | -0.138               | 1.54                     | -19.13                        | 0.4975 | 7.767                             | 0.341              | 7.118   | 7.538           | 7.72   | 7.981           | 9.073                   |         |
| CLECL1  | iZ4TQB72h9VvIHZv1E | rs1861089          | 3.38                         | 3.24                      | -0.063               | 0.78                     | -11.12                        | 0.075  | 7.767                             | 0.341              | 7.118   | 7.538           | 7.72   | 7.981           | 9.073                   |         |
| CLECL1  | iZ4TQB72h9VvIHZv1E | rs741199           | 4.83                         | 4.62                      | 0.094                | 1.09                     | -1.73                         | 0.3275 | 7.767                             | 0.341              | 7.118   | 7.538           | 7.72   | 7.981           | 9.073                   |         |
| CLECL1  | iZ4TQB72h9VvIHZv1E | rs10466829         | 10.71                        | 10.22                     | 0.207                | 2.7                      | 1                             | 0.5    | 7.767                             | 0.341              | 7.118   | 7.538           | 7.72   | 7.981           | 9.073                   |         |
| CLECL1  | iZ4TQB72h9VvIHZv1E | rs10844638         | 4.83                         | 4.62                      | 0.094                | 1.05                     | 2.54                          | 0.3275 | 7.767                             | 0.341              | 7.118   | 7.538           | 7.72   | 7.981           | 9.073                   |         |
| CLECL1  | iZ4TQB72h9VvIHZv1E | rs4763879          | 4.82                         | 4.61                      | -0.094               | 0.95                     | 24.3                          | 0.3401 | 7.767                             | 0.341              | 7.118   | 7.538           | 7.72   | 7.981           | 9.073                   |         |
| CLECL1  | iZ4TQB72h9VvIHZv1E | rs3136559          | 4.8                          | 4.59                      | 0.091                | 0.58                     | 30.78                         | 0.2675 | 7.767                             | 0.341              | 7.118   | 7.538           | 7.72   | 7.981           | 9.073                   |         |
| CLECL1  | iZ4TQB72h9VvIHZv1E | rs3176776          | 3.97                         | 3.80                      | 0.078                | 0.49                     | 30.96                         | 0.4221 | 7.767                             | 0.341              | 7.118   | 7.538           | 7.72   | 7.981           | 9.073                   |         |
| CLECL1  | iZ4TQB72h9VvIHZv1E | rs3176774          | 7.4                          | 7.07                      | 0.146                | 1.86                     | 31.25                         | 0.34   | 7.767                             | 0.341              | 7.118   | 7.538           | 7.72   | 7.981           | 9.073                   |         |
| CLECL1  | iZ4TQB72h9VvIHZv1E | rs3176773          | 4.86                         | 4.65                      | -0.096               | 0.38                     | 32.24                         | 0.4523 | 7.767                             | 0.341              | 7.118   | 7.538           | 7.72   | 7.981           | 9.073                   |         |
| CLECL1  | iZ4TQB72h9VvIHZv1E | rs11053043         | 7.36                         | 7.03                      | -0.146               | 1.17                     | 46.21                         | 0.4774 | 7.767                             | 0.341              | 7.118   | 7.538           | 7.72   | 7.981           | 9.073                   |         |
| CLIP3   | cSdGHIX0eTtVAdJOHU | rs4805149          | 13.34                        | 12.72                     | 0.259                | 1.92                     | -21.73                        | 0.155  | 7.821                             | 0.333              | 7.157   | 7.592           | 7.743  | 8.029           | 9.147                   |         |
| CLIP3   | cSdGHIX0eTtVAdJOHU | rs2073893          | 5.03                         | 4.81                      | -0.1                 | 0.15                     | -7.15                         | 0.3575 | 7.821                             | 0.333              | 7.157   | 7.592           | 7.743  | 8.029           | 9.147                   |         |
| CLUAP1  | cSv15J2cXC797KoKJQ | rs6501178          | 15.37                        | 14.65                     | -0.291               | 3.81                     | 6.47                          | 0.2781 | 8.434                             | 0.345              | 7.542   | 8.179           | 8.408  | 8.611           | 9.493                   |         |
| CLUAP1  | cSv15J2cXC797KoKJQ | rs17198722         | 15.04                        | 14.34                     | 0.279                | 3.57                     | 9.24                          | 0.15   | 8.434                             | 0.345              | 7.542   | 8.179           | 8.408  | 8.611           | 9.493                   |         |
| CLUAP1  | cSv15J2cXC797KoKJQ | rs13332500         | 13.2                         | 12.59                     | -0.245               | 4.6                      | -12.4                         | 0.315  | 8.434                             | 0.345              | 7.542   | 8.179           | 8.408  | 8.611           | 9.493                   |         |
| CLUAP1  | cSv15J2cXC797KoKJQ | rs9930893          | 5.34                         | 5.10                      | 0.105                | 3.07                     | 37.78                         | 0.4592 | 8.434                             | 0.345              | 7.542   | 8.179           | 8.408  | 8.611           | 9.493                   |         |
| CLYBL   | BsHSLVPUQITnLIUEQE | rs7982561          | 3.62                         | 3.46                      | 0.071                | 2.28                     | -51.34                        | 0.16   | 7.196                             | 0.061              | 7.116   | 7.151           | 7.185  | 7.223           | 7.485                   |         |
| CMTM1   | 3RVYnZ0e0VPuIwO4Uw | rs7193473          | 4.04                         | 3.86                      | -0.077               | 0.22                     | -0.17                         | 0.125  | 7.326                             | 0.137              | 7.132   | 7.24            | 7.308  | 7.376           | 8.156                   |         |
| CMTM3   | rkr6bHkojIFJe70U   | rs8051710          | 4.02                         | 3.85                      | 0.08                 | 1.81                     | 25.39                         | 0.4774 | 11.464                            | 0.224              | 10.972  | 11.31           | 11.469 | 11.608          | 12.237                  | Yes     |
| CMTM8   | ZppdNvf5fXrRtecZ6A | rs6550109          | 7.94                         | 7.58                      | 0.154                | 2.86                     | 11.03                         | 0.3925 | 9.96                              | 0.614              | 7.802   | 9.535           | 9.982  | 10.278          | 11.709                  |         |
| CMTM8   | ZppdNvf5fXrRtecZ6A | rs12496256         | 5.1                          | 4.88                      | 0.097                | 2.01                     | 19.38                         | 0.31   | 9.96                              | 0.614              | 7.802   | 9.535           | 9.982  | 10.278          | 11.709                  |         |
| CMTM8   | ZppdNvf5fXrRtecZ6A | rs17029181         | 5.28                         | 5.05                      | -0.101               | 1.4                      | -65.7                         | 0.0859 | 9.96                              | 0.614              | 7.802   | 9.535           | 9.982  | 10.278          | 11.709                  |         |
| CMYA5   | 9oDXeOhK0i4KCvuesl | rs1529457          | 3.46                         | 3.31                      | -0.064               | 1.85                     | 33.48                         | 0.335  | 7.222                             | 0.075              | 7.107   | 7.17            | 7.211  | 7.262           | 7.581                   |         |
| CNN2    | cfMedTtVaUTiWULHkQ | rs10419707         | 7.59                         | 7.25                      | 0.15                 | 2.56                     | -0.62                         | 0.1307 | 12.092                            | 0.346              | 11.096  | 11.886          | 12.101 | 12.312          | 12.891                  | Yes     |
| CNOT6   | BeoSr7B0l9QKgi5KqE | rs7705421          | 3.92                         | 3.75                      | -0.077               | 0.82                     | 16.06                         | 0.4425 | 8.967                             | 0.202              | 8.416   | 8.845           | 8.957  | 9.091           | 9.572                   |         |
| CNOT6   | BeoSr7B0l9QKgi5KqE | rs10516145         | 3.83                         | 3.67                      | -0.075               | 0.87                     | 30.16                         | 0.4375 | 8.967                             | 0.202              | 8.416   | 8.845           | 8.957  | 9.091           | 9.572                   |         |
| CNOT6   | BeoSr7B0l9QKgi5KqE | rs2453176          | 13.04                        | 12.44                     | 0.254                | 3.2                      | -29.56                        | 0.0875 | 8.967                             | 0.202              | 8.416   | 8.845           | 8.957  | 9.091           | 9.572                   |         |
| CNOT6   | BeoSr7B0l9QKgi5KqE | rs10069            | 4.77                         | 4.57                      | -0.095               | 1.3                      | -2.27                         | 0.205  | 8.967                             | 0.202              | 8.416   | 8.845           | 8.957  | 9.091           | 9.572                   |         |
| COBL    | o6dX_zjNut90TrS0U  | rs2329674          | 3.33                         | 3.19                      | 0.062                | 2.29                     | 124.74                        | 0.4775 | 7.141                             | 0.05               | 7.097   | 7.113           | 7.124  | 7.15            | 7.467                   |         |
| COG5    | 31LSJ09UekniQHMP0k | rs12670688         | 6.11                         | 5.84                      | -0.117               | 1.61                     | -21.98                        | 0.25   | 7.62                              | 0.287              | 7.102   | 7.434           | 7.617  | 7.813           | 8.448                   |         |
| COG5    | 31LSJ09UekniQHMP0k | rs2237659          | 6.52                         | 6.23                      | -0.125               | 2.08                     | 4.5                           | 0.255  | 7.62                              | 0.287              | 7.102   | 7.434           | 7.617  | 7.813           | 8.448                   |         |
| COG5    | 31LSJ09UekniQHMP0k | rs7785892          | 3.32                         | 3.18                      | -0.059               | 2.12                     | 91.18                         | 0.135  | 7.62                              | 0.287              | 7.102   | 7.434           | 7.617  | 7.813           | 8.448                   |         |



| Symbol  | Lumi nuID          | SNP        | Population-based association |                           |                      | Family-based association |                               |        | Transcript abundance (log2 scale) |                    |         |                 |        |                 | SNP mapping under probe |         |
|---------|--------------------|------------|------------------------------|---------------------------|----------------------|--------------------------|-------------------------------|--------|-----------------------------------|--------------------|---------|-----------------|--------|-----------------|-------------------------|---------|
|         |                    |            | p-value (-log10)             | p-value (-log10), GC adj. | % Variance Explained | p-value (-log10)         | Distance from transcript (kb) | MAF    | Mean                              | Standard Deviation | Minimum | 25th percentile | Median | 75th percentile |                         | Maximum |
| COG5    | 31LSJ09UekniQHMP0k | rs982447   | 6.53                         | 6.24                      | -0.125               | 1.93                     | 130.54                        | 0.2575 | 7.62                              | 0.287              | 7.102   | 7.434           | 7.617  | 7.813           | 8.448                   |         |
| COG5    | 9V59VQV5ffRwMJ0ydl | rs4727676  | 4.25                         | 4.07                      | 0.082                | 2.48                     | -140.8                        | 0.07   | 8.018                             | 0.412              | 7.456   | 7.731           | 7.902  | 8.152           | 9.72                    | Yes     |
| COG5    | 31LSJ09UekniQHMP0k | rs4727680  | 5.65                         | 5.40                      | -0.106               | 1.49                     | -117.08                       | 0.3166 | 7.62                              | 0.287              | 7.102   | 7.434           | 7.617  | 7.813           | 8.448                   |         |
| COG5    | 31LSJ09UekniQHMP0k | rs2520249  | 5.73                         | 5.47                      | 0.107                | 1.56                     | -57.74                        | 0.3175 | 7.62                              | 0.287              | 7.102   | 7.434           | 7.617  | 7.813           | 8.448                   |         |
| COG5    | 31LSJ09UekniQHMP0k | rs2023685  | 3.39                         | 3.25                      | -0.06                | 2.17                     | -36.15                        | 0.145  | 7.62                              | 0.287              | 7.102   | 7.434           | 7.617  | 7.813           | 8.448                   |         |
| COG5    | 31LSJ09UekniQHMP0k | rs2253833  | 8.3                          | 7.92                      | 0.156                | 2.73                     | 1.18                          | 0.25   | 7.62                              | 0.287              | 7.102   | 7.434           | 7.617  | 7.813           | 8.448                   |         |
| COG5    | 9V59VQV5ffRwMJ0ydl | rs2253833  | 4.76                         | 4.55                      | 0.093                | 3.28                     | 1.18                          | 0.25   | 8.018                             | 0.412              | 7.456   | 7.731           | 7.902  | 8.152           | 9.72                    | Yes     |
| COG6    | 6HllooviD6S7t83U74 | rs3812882  | 4.79                         | 4.58                      | 0.097                | 2.77                     | 0.08                          | 0.425  | 8.851                             | 0.24               | 8.125   | 8.741           | 8.881  | 9.025           | 9.443                   |         |
| COG6    | 6HllooviD6S7t83U74 | rs3812888  | 4.79                         | 4.58                      | 0.097                | 2.74                     | 0.48                          | 0.425  | 8.851                             | 0.24               | 8.125   | 8.741           | 8.881  | 9.025           | 9.443                   |         |
| COG6    | 6HllooviD6S7t83U74 | rs9532412  | 3.73                         | 3.57                      | -0.073               | 2.01                     | 2.1                           | 0.2975 | 8.851                             | 0.24               | 8.125   | 8.741           | 8.881  | 9.025           | 9.443                   |         |
| COG6    | 6HllooviD6S7t83U74 | rs12584772 | 3.51                         | 3.36                      | 0.068                | 1.06                     | -22.83                        | 0.2325 | 8.851                             | 0.24               | 8.125   | 8.741           | 8.881  | 9.025           | 9.443                   |         |
| COG6    | 6HllooviD6S7t83U74 | rs9532427  | 3.51                         | 3.36                      | 0.068                | 1.12                     | -5.28                         | 0.2325 | 8.851                             | 0.24               | 8.125   | 8.741           | 8.881  | 9.025           | 9.443                   |         |
| COG6    | 6HllooviD6S7t83U74 | rs4943694  | 4.64                         | 4.44                      | -0.094               | 3.33                     | 2.4                           | 0.4175 | 8.851                             | 0.24               | 8.125   | 8.741           | 8.881  | 9.025           | 9.443                   |         |
| COG6    | 6HllooviD6S7t83U74 | rs4409964  | 4.64                         | 4.44                      | 0.094                | 3.43                     | 16.11                         | 0.4175 | 8.851                             | 0.24               | 8.125   | 8.741           | 8.881  | 9.025           | 9.443                   |         |
| COG6    | 6HllooviD6S7t83U74 | rs8181861  | 3.43                         | 3.29                      | -0.069               | 3.01                     | 43.54                         | 0.43   | 8.851                             | 0.24               | 8.125   | 8.741           | 8.881  | 9.025           | 9.443                   |         |
| COL18A1 | NLT297oqELodKkmUp4 | rs11702782 | 6.01                         | 5.75                      | 0.118                | 2.32                     | -26.84                        | 0.13   | 8.374                             | 0.625              | 7.127   | 7.978           | 8.271  | 8.782           | 10.472                  |         |
| COL18A1 | NLT297oqELodKkmUp4 | rs9980531  | 8.41                         | 8.03                      | 0.17                 | 2.69                     | -15.71                        | 0.21   | 8.374                             | 0.625              | 7.127   | 7.978           | 8.271  | 8.782           | 10.472                  |         |
| COL18A1 | NLT297oqELodKkmUp4 | rs2236451  | 14.45                        | 13.78                     | -0.281               | 4.49                     | 0.66                          | 0.29   | 8.374                             | 0.625              | 7.127   | 7.978           | 8.271  | 8.782           | 10.472                  |         |
| COL18A1 | NLT297oqELodKkmUp4 | rs2236459  | 8.67                         | 8.28                      | -0.174               | 3.05                     | 21.66                         | 0.2675 | 8.374                             | 0.625              | 7.127   | 7.978           | 8.271  | 8.782           | 10.472                  |         |
| COL18A1 | NLT297oqELodKkmUp4 | rs9976834  | 10.36                        | 9.88                      | -0.208               | 2.91                     | 21.79                         | 0.19   | 8.374                             | 0.625              | 7.127   | 7.978           | 8.271  | 8.782           | 10.472                  |         |
| COL18A1 | NLT297oqELodKkmUp4 | rs9977482  | 16.91                        | 16.12                     | -0.324               | 5.03                     | 23.7                          | 0.2325 | 8.374                             | 0.625              | 7.127   | 7.978           | 8.271  | 8.782           | 10.472                  |         |
| COL18A1 | NLT297oqELodKkmUp4 | rs2236470  | 16.91                        | 16.12                     | -0.324               | 5                        | 27.6                          | 0.2325 | 8.374                             | 0.625              | 7.127   | 7.978           | 8.271  | 8.782           | 10.472                  |         |
| COL18A1 | NLT297oqELodKkmUp4 | rs2236472  | 16.91                        | 16.12                     | -0.324               | 5.12                     | 27.99                         | 0.2325 | 8.374                             | 0.625              | 7.127   | 7.978           | 8.271  | 8.782           | 10.472                  |         |
| COL18A1 | NLT297oqELodKkmUp4 | rs11702425 | 8.85                         | 8.40                      | 0.176                | 1.97                     | -25.28                        | 0.31   | 8.374                             | 0.625              | 7.127   | 7.978           | 8.271  | 8.782           | 10.472                  |         |
| COL21A1 | fpLo_Xvva77yRd4MI  | rs6459143  | 3.34                         | 3.24                      | -0.063               | 1.82                     | 42.72                         | 0.27   | 7.112                             | 0.009              | 7.096   | 7.106           | 7.111  | 7.116           | 7.165                   |         |
| COL5A2  | BiTb1Dn70e9d7THs3o | rs17292943 | 3.59                         | 3.48                      | -0.067               | 0.82                     | -49.94                        | 0.2375 | 7.187                             | 0.185              | 7.101   | 7.127           | 7.147  | 7.176           | 8.542                   |         |
| COL5A2  | BiTb1Dn70e9d7THs3o | rs3736487  | 3.64                         | 3.44                      | -0.068               | 0.43                     | -41.3                         | 0.2337 | 7.187                             | 0.185              | 7.101   | 7.127           | 7.147  | 7.176           | 8.542                   |         |
| COL5A2  | BiTb1Dn70e9d7THs3o | rs6434309  | 7.16                         | 6.84                      | -0.147               | 2.34                     | -14.07                        | 0.1075 | 7.187                             | 0.185              | 7.101   | 7.127           | 7.147  | 7.176           | 8.542                   |         |
| COL5A2  | BiTb1Dn70e9d7THs3o | rs7422977  | 7.16                         | 6.84                      | 0.147                | 2.34                     | -12.65                        | 0.1075 | 7.187                             | 0.185              | 7.101   | 7.127           | 7.147  | 7.176           | 8.542                   |         |
| COL5A2  | BiTb1Dn70e9d7THs3o | rs10194682 | 3.99                         | 3.82                      | 0.081                | 1.55                     | 9.5                           | 0.2191 | 7.187                             | 0.185              | 7.101   | 7.127           | 7.147  | 7.176           | 8.542                   |         |
| COL5A2  | BiTb1Dn70e9d7THs3o | rs6434317  | 4.16                         | 3.98                      | 0.083                | 1.72                     | 39.45                         | 0.2111 | 7.187                             | 0.185              | 7.101   | 7.127           | 7.147  | 7.176           | 8.542                   |         |
| COL5A2  | BiTb1Dn70e9d7THs3o | rs4128538  | 11.51                        | 10.98                     | 0.221                | 1.85                     | -69.69                        | 0.055  | 7.187                             | 0.185              | 7.101   | 7.127           | 7.147  | 7.176           | 8.542                   |         |
| COL5A2  | BiTb1Dn70e9d7THs3o | rs9288163  | 4.83                         | 4.62                      | -0.094               | 1.69                     | -31.34                        | 0.11   | 7.187                             | 0.185              | 7.101   | 7.127           | 7.147  | 7.176           | 8.542                   |         |
| COL5A2  | BiTb1Dn70e9d7THs3o | rs12999125 | 3.59                         | 3.44                      | 0.068                | 2.13                     | 13.97                         | 0.1375 | 7.187                             | 0.185              | 7.101   | 7.127           | 7.147  | 7.176           | 8.542                   |         |
| COL5A2  | BiTb1Dn70e9d7THs3o | rs4667270  | 10.18                        | 9.72                      | -0.207               | 2.11                     | 19.68                         | 0.0678 | 7.187                             | 0.185              | 7.101   | 7.127           | 7.147  | 7.176           | 8.542                   |         |
| COL5A2  | BiTb1Dn70e9d7THs3o | rs10755002 | 3.29                         | 3.15                      | 0.061                | 2.01                     | 24.69                         | 0.145  | 7.187                             | 0.185              | 7.101   | 7.127           | 7.147  | 7.176           | 8.542                   |         |
| COL5A2  | BiTb1Dn70e9d7THs3o | rs1913892  | 4.08                         | 3.90                      | -0.079               | 1.7                      | 36.5                          | 0.149  | 7.187                             | 0.185              | 7.101   | 7.127           | 7.147  | 7.176           | 8.542                   |         |
| COL5A3  | xqH1fh6vu.f9eXSVJ0 | rs889125   | 4.39                         | 4.20                      | 0.08                 | 1.56                     | -0.58                         | 0.23   | 7.249                             | 0.131              | 7.108   | 7.158           | 7.208  | 7.289           | 7.888                   |         |
| COL9A3  | HloBSrhlohApmkokqc | rs760084   | 4.26                         | 4.08                      | 0.084                | 1.49                     | -9.3                          | 0.155  | 7.122                             | 0.014              | 7.095   | 7.113           | 7.118  | 7.127           | 7.17                    |         |
| COLEC11 | 6ie1d7gq6KdHiyKnvs | rs4850068  | 8.47                         | 8.09                      | -0.171               | 5.88                     | 13.11                         | 0.33   | 7.173                             | 0.08               | 7.103   | 7.132           | 7.147  | 7.183           | 7.598                   |         |
| COLEC11 | 6ie1d7gq6KdHiyKnvs | rs4850073  | 5.01                         | 4.79                      | -0.099               | 4.69                     | -23.39                        | 0.465  | 7.173                             | 0.08               | 7.103   | 7.132           | 7.147  | 7.183           | 7.598                   |         |
| COLEC11 | 6ie1d7gq6KdHiyKnvs | rs7576701  | 3.33                         | 3.19                      | -0.062               | 0.63                     | 26.18                         | 0.1809 | 7.173                             | 0.08               | 7.103   | 7.132           | 7.147  | 7.183           | 7.598                   |         |
| COLEC12 | xvXq9bOPU4Z4E3uXk  | rs8083599  | 3.85                         | 3.69                      | 0.073                | 0.13                     | 53.48                         | 0.2825 | 7.143                             | 0.036              | 7.101   | 7.12            | 7.133  | 7.154           | 7.384                   |         |
| COLEC12 | xvXq9bOPU4Z4E3uXk  | rs11081065 | 3.62                         | 3.47                      | -0.07                | 0.33                     | 60.39                         | 0.16   | 7.143                             | 0.036              | 7.101   | 7.12            | 7.133  | 7.154           | 7.384                   |         |
| COLEC12 | xvXq9bOPU4Z4E3uXk  | rs16943586 | 3.62                         | 3.47                      | -0.07                | 0.33                     | 62.73                         | 0.16   | 7.143                             | 0.036              | 7.101   | 7.12            | 7.133  | 7.154           | 7.384                   |         |
| COLEC12 | xvXq9bOPU4Z4E3uXk  | rs722725   | 3.3                          | 3.16                      | -0.062               | 0.12                     | -85.58                        | 0.2425 | 7.143                             | 0.036              | 7.101   | 7.12            | 7.133  | 7.154           | 7.384                   |         |
| COLEC12 | xvXq9bOPU4Z4E3uXk  | rs16944284 | 4.18                         | 4.00                      | 0.081                | 0.29                     | -79.11                        | 0.1175 | 7.143                             | 0.036              | 7.101   | 7.12            | 7.133  | 7.154           | 7.384                   |         |
| COLQ    | 3peq177.Tnn1FNEeq8 | rs6777812  | 5.06                         | 4.84                      | 0.1                  | 2.05                     | -20.97                        | 0.235  | 8.488                             | 0.388              | 7.554   | 8.215           | 8.513  | 8.706           | 9.616                   |         |
| COLQ    | 3peq177.Tnn1FNEeq8 | rs983289   | 3.42                         | 3.27                      | 0.064                | 1.99                     | -15.29                        | 0.33   | 8.488                             | 0.388              | 7.554   | 8.215           | 8.513  | 8.706           | 9.616                   |         |
| COLQ    | 3peq177.Tnn1FNEeq8 | rs2124493  | 6.1                          | 5.83                      | -0.124               | 2.76                     | -7.99                         | 0.155  | 8.488                             | 0.388              | 7.554   | 8.215           | 8.513  | 8.706           | 9.616                   |         |
| COLQ    | 3peq177.Tnn1FNEeq8 | rs12633887 | 3.93                         | 3.76                      | 0.075                | 2.31                     | 26.33                         | 0.32   | 8.488                             | 0.388              | 7.554   | 8.215           | 8.513  | 8.706           | 9.616                   |         |
| COLQ    | 3peq177.Tnn1FNEeq8 | rs11706669 | 4.93                         | 4.72                      | -0.099               | 2.27                     | 36.15                         | 0.1325 | 8.488                             | 0.388              | 7.554   | 8.215           | 8.513  | 8.706           | 9.616                   |         |
| COMMD2  | c.s.wi3TncW_gcll6U | rs6809024  | 3.31                         | 3.17                      | -0.062               | 1.39                     | -30.35                        | 0.3392 | 9.144                             | 0.364              | 7.459   | 8.956           | 9.237  | 9.396           | 9.763                   |         |
| COMMD2  | c.s.wi3TncW_gcll6U | rs1002896  | 5.72                         | 5.47                      | -0.111               | 3.29                     | -8.59                         | 0.445  | 9.144                             | 0.364              | 7.459   | 8.956           | 9.237  | 9.396           | 9.763                   |         |
| COMMD2  | c.s.wi3TncW_gcll6U | rs12330718 | 5.84                         | 5.72                      | 0.114                | 3.15                     | -2.38                         | 0.4422 | 9.144                             | 0.364              | 7.459   | 8.956           | 9.237  | 9.396           | 9.763                   |         |
| COMMD2  | c.s.wi3TncW_gcll6U | rs6796427  | 7.04                         | 6.58                      | -0.137               | 2.11                     | 1.82                          | 0.0775 | 9.144                             | 0.364              | 7.459   | 8.956           | 9.237  | 9.396           | 9.763                   |         |
| COMMD2  | c.s.wi3TncW_gcll6U | rs13072089 | 5.38                         | 5.14                      | -0.104               | 3.11                     | 9.66                          | 0.4675 | 9.144                             | 0.364              | 7.459   | 8.956           | 9.237  | 9.396           | 9.763                   |         |
| COPZ2   | W9VDXpAJJUCNUqoiFU | rs7350950  | 3.67                         | 3.5                       | -0.07                | 1.01                     | 48.72                         | 0.0825 | 7.135                             | 0.032              | 7.096   | 7.117           | 7.126  | 7.142           | 7.309                   |         |
| COQ5    | Zonn0TdlUik.refz50 | rs3213565  | 4.82                         | 4.61                      | 0.094                | 0.91                     | 25.45                         | 0.32   | 9.933                             | 0.219              | 9.358   | 9.802           | 9.947  | 10.078          | 10.417                  |         |
| CORO1B  | 0KWCUmVJ.XR717oo7c | rs1638588  | 3.33                         | 3.19                      | 0.064                | 0.97                     | -5.81                         | 0.44   | 10.635                            | 0.382              | 9.485   | 10.384          | 10.668 | 10.927          | 11.42                   |         |
| CORO1B  | 0KWCUmVJ.XR717oo7c | rs2302264  | 3.55                         | 3.40                      | 0.07                 | 1.08                     | 1.91                          | 0.4343 | 10.635                            | 0.382              | 9.485   | 10.384          | 10.668 | 10.927          | 11.42                   |         |
| COX11   | WVT1_Mhd_38eoJ6iIE | rs9904377  | 5.93                         | 5.67                      | 0.124                | 2.17                     | -43.28                        | 0.2625 | 7.921                             | 0.208              | 7.108   | 7.787           | 7.938  | 8.053           | 8.536                   |         |

| Symbol  | Lumi nuID          | SNP        | Population-based             | Population-based                      | % Variance Explained | Family-based                 | Distance from transcript (kb) | MAF    | Mean   | Transcript abundance (log2 scale) |         |                 |        |                 | SNP mapping under probe |         |
|---------|--------------------|------------|------------------------------|---------------------------------------|----------------------|------------------------------|-------------------------------|--------|--------|-----------------------------------|---------|-----------------|--------|-----------------|-------------------------|---------|
|         |                    |            | association p-value (-log10) | association p-value (-log10), GC adj. |                      | association p-value (-log10) |                               |        |        | Standard Deviation                | Minimum | 25th percentile | Median | 75th percentile |                         | Maximum |
| COX11   | WVT1_MHd_38eoJ6tE  | rs9910653  | 7                            | 6.69                                  | 0.146                | 2.8                          | -36.99                        | 0.275  | 7.921  | 0.208                             | 7.108   | 7.787           | 7.938  | 8.053           | 8.536                   |         |
| COX11   | WVT1_MHd_38eoJ6tE  | rs9900816  | 6.81                         | 6.51                                  | 0.144                | 2.34                         | -17.21                        | 0.2575 | 7.921  | 0.208                             | 7.108   | 7.787           | 7.938  | 8.053           | 8.536                   |         |
| COX11   | WVT1_MHd_38eoJ6tE  | rs11869726 | 7.15                         | 6.83                                  | 0.143                | 3.65                         | -5.77                         | 0.3025 | 7.921  | 0.208                             | 7.108   | 7.787           | 7.938  | 8.053           | 8.536                   |         |
| COX11   | WVT1_MHd_38eoJ6tE  | rs11870311 | 7.15                         | 6.83                                  | 0.143                | 3.65                         | -5.37                         | 0.3025 | 7.921  | 0.208                             | 7.108   | 7.787           | 7.938  | 8.053           | 8.536                   |         |
| COX11   | WVT1_MHd_38eoJ6tE  | rs3087650  | 4.56                         | 4.36                                  | 0.095                | 1.85                         | 0.06                          | 0.24   | 7.921  | 0.208                             | 7.108   | 7.787           | 7.938  | 8.053           | 8.536                   |         |
| COX11   | WVT1_MHd_38eoJ6tE  | rs11871939 | 7.15                         | 6.83                                  | 0.143                | 3.65                         | -2.29                         | 0.3025 | 7.921  | 0.208                             | 7.108   | 7.787           | 7.938  | 8.053           | 8.536                   |         |
| COX11   | WVT1_MHd_38eoJ6tE  | rs7226272  | 5.18                         | 4.96                                  | 0.103                | 1.16                         | 0.39                          | 0.41   | 7.921  | 0.208                             | 7.108   | 7.787           | 7.938  | 8.053           | 8.536                   |         |
| COX4NB  | BUZICdG5eSpSgKgONs | rs11640737 | 5.81                         | 5.55                                  | -0.114               | 1.43                         | -16.96                        | 0.08   | 8.247  | 0.2                               | 7.644   | 8.103           | 8.25   | 8.387           | 8.755                   |         |
| COX4NB  | BUZICdG5eSpSgKgONs | rs11860152 | 4.7                          | 4.49                                  | 0.092                | 1.59                         | 5.09                          | 0.0525 | 8.247  | 0.2                               | 7.644   | 8.103           | 8.25   | 8.387           | 8.755                   |         |
| COX4NB  | BUZICdG5eSpSgKgONs | rs896253   | 4.7                          | 4.49                                  | 0.092                | 1.59                         | 7.97                          | 0.0525 | 8.247  | 0.2                               | 7.644   | 8.103           | 8.25   | 8.387           | 8.755                   |         |
| COX4NB  | BUZICdG5eSpSgKgONs | rs11644720 | 5.88                         | 5.63                                  | 0.117                | 1.88                         | -6.02                         | 0.0603 | 8.247  | 0.2                               | 7.644   | 8.103           | 8.25   | 8.387           | 8.755                   |         |
| COX4NB  | BUZICdG5eSpSgKgONs | rs11647655 | 6.11                         | 5.84                                  | 0.121                | 2.08                         | -6                            | 0.0553 | 8.247  | 0.2                               | 7.644   | 8.103           | 8.25   | 8.387           | 8.755                   |         |
| COX7A2L | fSofivk_JOq5KJf3o  | rs2053347  | 3.38                         | 3.24                                  | 0.06                 | 1                            | -30.41                        | 0.4515 | 11.657 | 0.272                             | 9.355   | 11.512          | 11.66  | 11.795          | 12.174                  |         |
| COX7A2L | fSofivk_JOq5KJf3o  | rs1981664  | 3.32                         | 3.18                                  | -0.059               | 0.61                         | -0.47                         | 0.4369 | 11.657 | 0.272                             | 9.355   | 11.512          | 11.66  | 11.795          | 12.174                  |         |
| COX7A2L | fSofivk_JOq5KJf3o  | rs10206058 | 3.58                         | 3.43                                  | 0.066                | 1.97                         | -4.69                         | 0.3719 | 11.657 | 0.272                             | 9.355   | 11.512          | 11.66  | 11.795          | 12.174                  |         |
| COX7A2L | fSofivk_JOq5KJf3o  | rs1992258  | 3.58                         | 3.43                                  | 0.064                | 0.45                         | 11.56                         | 0.3945 | 11.657 | 0.272                             | 9.355   | 11.512          | 11.66  | 11.795          | 12.174                  |         |
| CPA5    | u.pJNJFFdzulLqNFtg | rs3807345  | 5.53                         | 5.29                                  | 0.107                | 3.22                         | -43.42                        | 0.385  | 7.593  | 0.517                             | 7.11    | 7.199           | 7.346  | 7.837           | 9.618                   | Yes     |
| CPA5    | u.pJNJFFdzulLqNFtg | rs11981987 | 3.71                         | 3.59                                  | 0.07                 | 2.67                         | -43.08                        | 0.3175 | 7.593  | 0.517                             | 7.11    | 7.199           | 7.346  | 7.837           | 9.618                   | Yes     |
| CPA5    | u.pJNJFFdzulLqNFtg | rs2171492  | 5.63                         | 5.38                                  | -0.108               | 2.91                         | -33.95                        | 0.3675 | 7.593  | 0.517                             | 7.11    | 7.199           | 7.346  | 7.837           | 9.618                   | Yes     |
| CPA5    | u.pJNJFFdzulLqNFtg | rs3800775  | 5.6                          | 5.35                                  | -0.108               | 2.76                         | -26.52                        | 0.375  | 7.593  | 0.517                             | 7.11    | 7.199           | 7.346  | 7.837           | 9.618                   | Yes     |
| CPA5    | u.pJNJFFdzulLqNFtg | rs7793804  | 5.58                         | 5.33                                  | -0.11                | 3.57                         | -11.63                        | 0.29   | 7.593  | 0.517                             | 7.11    | 7.199           | 7.346  | 7.837           | 9.618                   | Yes     |
| CPA5    | u.pJNJFFdzulLqNFtg | rs7794088  | 3.61                         | 3.46                                  | -0.067               | 2.14                         | -11.46                        | 0.4825 | 7.593  | 0.517                             | 7.11    | 7.199           | 7.346  | 7.837           | 9.618                   | Yes     |
| CPA5    | u.pJNJFFdzulLqNFtg | rs7798773  | 5.62                         | 5.38                                  | -0.112               | 3.57                         | -10.48                        | 0.2889 | 7.593  | 0.517                             | 7.11    | 7.199           | 7.346  | 7.837           | 9.618                   | Yes     |
| CPA5    | u.pJNJFFdzulLqNFtg | rs4731678  | 10.27                        | 9.80                                  | -0.197               | 1.73                         | -7.86                         | 0.06   | 7.593  | 0.517                             | 7.11    | 7.199           | 7.346  | 7.837           | 9.618                   | Yes     |
| CPA5    | u.pJNJFFdzulLqNFtg | rs10234851 | 5.03                         | 4.81                                  | -0.096               | 3.44                         | 2.28                          | 0.3425 | 7.593  | 0.517                             | 7.11    | 7.199           | 7.346  | 7.837           | 9.618                   | Yes     |
| CPA5    | u.pJNJFFdzulLqNFtg | rs888397   | 19.34                        | 18.44                                 | 0.351                | 3.32                         | 6.64                          | 0.1307 | 7.593  | 0.517                             | 7.11    | 7.199           | 7.346  | 7.837           | 9.618                   | Yes     |
| CPA5    | u.pJNJFFdzulLqNFtg | rs1544705  | 34.62                        | 32.96                                 | 0.55                 | 6.96                         | -6.25                         | 0.1725 | 7.593  | 0.517                             | 7.11    | 7.199           | 7.346  | 7.837           | 9.618                   | Yes     |
| CPA5    | u.pJNJFFdzulLqNFtg | rs17164851 | 23.36                        | 22.26                                 | -0.41                | 5                            | -5.08                         | 0.16   | 7.593  | 0.517                             | 7.11    | 7.199           | 7.346  | 7.837           | 9.618                   | Yes     |
| CPA5    | u.pJNJFFdzulLqNFtg | rs11761888 | 42.42                        | 40.39                                 | -0.623               | 9.08                         | -1.19                         | 0.21   | 7.593  | 0.517                             | 7.11    | 7.199           | 7.346  | 7.837           | 9.618                   | Yes     |
| CPA5    | u.pJNJFFdzulLqNFtg | rs748812   | 12.71                        | 12.12                                 | 0.246                | 4.42                         | -0.97                         | 0.485  | 7.593  | 0.517                             | 7.11    | 7.199           | 7.346  | 7.837           | 9.618                   | Yes     |
| CPA5    | u.pJNJFFdzulLqNFtg | rs11772922 | 42.42                        | 40.39                                 | 0.623                | 9.08                         | -0.51                         | 0.21   | 7.593  | 0.517                             | 7.11    | 7.199           | 7.346  | 7.837           | 9.618                   | Yes     |
| CPA5    | u.pJNJFFdzulLqNFtg | rs17164872 | 8.24                         | 7.87                                  | -0.16                | 4.16                         | 0.78                          | 0.33   | 7.593  | 0.517                             | 7.11    | 7.199           | 7.346  | 7.837           | 9.618                   | Yes     |
| CPA5    | u.pJNJFFdzulLqNFtg | rs968404   | 20.8                         | 19.82                                 | 0.374                | 4.14                         | 13.47                         | 0.1275 | 7.593  | 0.517                             | 7.11    | 7.199           | 7.346  | 7.837           | 9.618                   | Yes     |
| CPA5    | u.pJNJFFdzulLqNFtg | rs12706927 | 19.01                        | 18.12                                 | 0.35                 | 2.9                          | 14.97                         | 0.1025 | 7.593  | 0.517                             | 7.11    | 7.199           | 7.346  | 7.837           | 9.618                   | Yes     |
| CPA5    | u.pJNJFFdzulLqNFtg | rs4731691  | 4.61                         | 4.41                                  | -0.092               | 2.39                         | 34.41                         | 0.1925 | 7.593  | 0.517                             | 7.11    | 7.199           | 7.346  | 7.837           | 9.618                   | Yes     |
| CPEB4   | fHgJLTmDoq537snrSo | rs4867730  | 5.08                         | 4.86                                  | 0.098                | 2.3                          | -45.26                        | 0.3325 | 7.726  | 0.257                             | 7.167   | 7.55            | 7.727  | 7.869           | 8.77                    |         |
| CPEB4   | fHgJLTmDoq537snrSo | rs10051599 | 4.93                         | 4.72                                  | -0.095               | 2.18                         | -40.95                        | 0.33   | 7.726  | 0.257                             | 7.167   | 7.55            | 7.727  | 7.869           | 8.77                    |         |
| CPEB4   | fHgJLTmDoq537snrSo | rs359457   | 7.24                         | 6.92                                  | -0.142               | 2.91                         | -36.35                        | 0.4573 | 7.726  | 0.257                             | 7.167   | 7.55            | 7.727  | 7.869           | 8.77                    |         |
| CPEB4   | fHgJLTmDoq537snrSo | rs875741   | 5.08                         | 4.86                                  | 0.098                | 2.73                         | -28.34                        | 0.4075 | 7.726  | 0.257                             | 7.167   | 7.55            | 7.727  | 7.869           | 8.77                    |         |
| CPEB4   | fHgJLTmDoq537snrSo | rs2594867  | 6.65                         | 6.35                                  | 0.129                | 3.71                         | 18.6                          | 0.4425 | 7.726  | 0.257                             | 7.167   | 7.55            | 7.727  | 7.869           | 8.77                    |         |
| CPEB4   | fHgJLTmDoq537snrSo | rs7736263  | 15.2                         | 14.49                                 | 0.287                | 4.96                         | 23.03                         | 0.3075 | 7.726  | 0.257                             | 7.167   | 7.55            | 7.727  | 7.869           | 8.77                    |         |
| CPEB4   | fHgJLTmDoq537snrSo | rs747472   | 15.2                         | 14.49                                 | -0.287               | 4.96                         | -33.8                         | 0.3075 | 7.726  | 0.257                             | 7.167   | 7.55            | 7.727  | 7.869           | 8.77                    |         |
| CPEB4   | fHgJLTmDoq537snrSo | rs6875935  | 3.52                         | 3.37                                  | 0.068                | 0.34                         | 3.07                          | 0.3425 | 7.726  | 0.257                             | 7.167   | 7.55            | 7.727  | 7.869           | 8.77                    |         |
| CPNE1   | fKXK9X6Ke6QtdDXu1Q | rs6088887  | 3.66                         | 3.50                                  | 0.068                | 2.37                         | -42.64                        | 0.2425 | 10.966 | 0.477                             | 9.731   | 10.632          | 11.009 | 11.293          | 12.129                  |         |
| CPNE1   | fKXK9X6Ke6QtdDXu1Q | rs6060491  | 3.7                          | 3.54                                  | -0.068               | 2.28                         | -38.87                        | 0.1425 | 10.966 | 0.477                             | 9.731   | 10.632          | 11.009 | 11.293          | 12.129                  |         |
| CPNE1   | fKXK9X6Ke6QtdDXu1Q | rs761827   | 5.06                         | 4.84                                  | -0.098               | 1.72                         | -6.07                         | 0.175  | 10.966 | 0.477                             | 9.731   | 10.632          | 11.009 | 11.293          | 12.129                  |         |
| CPNE1   | fKXK9X6Ke6QtdDXu1Q | rs6579255  | 3.59                         | 3.44                                  | 0.067                | 1.2                          | 5.53                          | 0.196  | 10.966 | 0.477                             | 9.731   | 10.632          | 11.009 | 11.293          | 12.129                  |         |
| CPNE1   | fKXK9X6Ke6QtdDXu1Q | rs3787168  | 3.65                         | 3.49                                  | 0.068                | 1.19                         | 19.31                         | 0.195  | 10.966 | 0.477                             | 9.731   | 10.632          | 11.009 | 11.293          | 12.129                  |         |
| CPNE1   | fKXK9X6Ke6QtdDXu1Q | rs12480622 | 3.64                         | 3.49                                  | 0.068                | 1.19                         | -18.23                        | 0.1925 | 10.966 | 0.477                             | 9.731   | 10.632          | 11.009 | 11.293          | 12.129                  |         |
| CPNE1   | fKXK9X6Ke6QtdDXu1Q | rs6121015  | 3.65                         | 3.49                                  | -0.068               | 1.19                         | -9.83                         | 0.195  | 10.966 | 0.477                             | 9.731   | 10.632          | 11.009 | 11.293          | 12.129                  |         |
| CPNE1   | fKXK9X6Ke6QtdDXu1Q | rs11696527 | 4.51                         | 4.32                                  | -0.083               | 1.96                         | -7.47                         | 0.1225 | 10.966 | 0.477                             | 9.731   | 10.632          | 11.009 | 11.293          | 12.129                  |         |
| CPSF1   | 6fpWlqMNI_09Ed1VI  | rs6748782  | 4.94                         | 4.72                                  | -0.098               | 1.65                         | -2.77                         | 0.0625 | 7.123  | 0.017                             | 7.096   | 7.111           | 7.119  | 7.13            | 7.216                   |         |
| CPSF1   | 6o5bRRSRGgcXVfV_w  | rs12056725 | 5.32                         | 5.08                                  | -0.107               | 1.34                         | -42.96                        | 0.4297 | 10.361 | 0.486                             | 9.344   | 10.008          | 10.327 | 10.684          | 11.591                  |         |
| CPSF1   | 6o5bRRSRGgcXVfV_w  | rs2272663  | 3.93                         | 3.76                                  | -0.073               | 0.51                         | -40.15                        | 0.48   | 10.361 | 0.486                             | 9.344   | 10.008          | 10.327 | 10.684          | 11.591                  |         |
| CPSF1   | 6o5bRRSRGgcXVfV_w  | rs2272666  | 5.03                         | 4.81                                  | -0.097               | 0.86                         | -37.46                        | 0.4444 | 10.361 | 0.486                             | 9.344   | 10.008          | 10.327 | 10.684          | 11.591                  |         |
| CPSF1   | 6o5bRRSRGgcXVfV_w  | rs3817681  | 5.08                         | 4.86                                  | 0.097                | 0.82                         | -35.58                        | 0.445  | 10.361 | 0.486                             | 9.344   | 10.008          | 10.327 | 10.684          | 11.591                  |         |
| CPSF1   | 6o5bRRSRGgcXVfV_w  | rs6599528  | 5.5                          | 5.26                                  | -0.106               | 0.59                         | -15.33                        | 0.4525 | 10.361 | 0.486                             | 9.344   | 10.008          | 10.327 | 10.684          | 11.591                  |         |
| CPSF1   | 6o5bRRSRGgcXVfV_w  | rs2293963  | 4.44                         | 4.25                                  | -0.085               | 1.12                         | 6.19                          | 0.3618 | 10.361 | 0.486                             | 9.344   | 10.008          | 10.327 | 10.684          | 11.591                  |         |
| CPSF1   | 6o5bRRSRGgcXVfV_w  | rs13258200 | 4.52                         | 4.32                                  | -0.086               | 0.91                         | -3.54                         | 0.3625 | 10.361 | 0.486                             | 9.344   | 10.008          | 10.327 | 10.684          | 11.591                  |         |
| CPT1A   | WoC3STOGEKX6KIUE0  | rs10791993 | 4.2                          | 4.02                                  | -0.084               | 2.55                         | -28.38                        | 0.265  | 7.153  | 0.057                             | 7.094   | 7.115           | 7.136  | 7.164           | 7.466                   |         |
| CPT1A   | WoC3STOGEKX6KIUE0  | rs4930608  | 4.6                          | 4.40                                  | 0.089                | 2.59                         | 9.51                          | 0.175  | 7.153  | 0.057                             | 7.094   | 7.115           | 7.136  | 7.164           | 7.466                   |         |
| CPT1A   | WoC3STOGEKX6KIUE0  | rs2123869  | 4.75                         | 4.55                                  | 0.092                | 2.78                         | 16.57                         | 0.1734 | 7.153  | 0.057                             | 7.094   | 7.115           | 7.136  | 7.164           | 7.466                   |         |

| Symbol  | Lumi nuID          | SNP        | Population-based association |                           |                      | Family-based association |                               |        | Transcript abundance (log2 scale) |                    |         |                 |        |                 | SNP mapping under probe |         |
|---------|--------------------|------------|------------------------------|---------------------------|----------------------|--------------------------|-------------------------------|--------|-----------------------------------|--------------------|---------|-----------------|--------|-----------------|-------------------------|---------|
|         |                    |            | p-value (-log10)             | p-value (-log10), GC adj. | % Variance Explained | p-value (-log10)         | Distance from transcript (kb) | MAF    | Mean                              | Standard Deviation | Minimum | 25th percentile | Median | 75th percentile |                         | Maximum |
| CPT1A   | WoC3STOG           | EKX6KIUE60 | rs2924685                    | 7.33                      | 7.00                 | -0.143                   | 1.88                          | 27.98  | 0.0675                            | 7.153              | 0.057   | 7.094           | 7.115  | 7.136           | 7.164                   | 7.466   |
| CPT1A   | WoC3STOG           | EKX6KIUE60 | rs11228368                   | 3.72                      | 3.57                 | -0.072                   | 1.38                          | -16.02 | 0.475                             | 7.153              | 0.057   | 7.094           | 7.115  | 7.136           | 7.164                   | 7.466   |
| CPT1A   | WoC3STOG           | EKX6KIUE60 | rs679596                     | 4.47                      | 4.27                 | -0.087                   | 1.52                          | 5.84   | 0.4774                            | 7.153              | 0.057   | 7.094           | 7.115  | 7.136           | 7.164                   | 7.466   |
| CREB1   | Tnidfj5fKhIPFUI34k |            | rs13010104                   | 3.3                       | 3.16                 | 0.06                     | 0.77                          | -25.47 | 0.17                              | 8.881              | 0.331   | 7.714           | 8.654  | 8.927           | 9.113                   | 9.756   |
| CREB1   | Tnidfj5fKhIPFUI34k |            | rs2709373                    | 10.29                     | 9.82                 | -0.197                   | 1.54                          | -8.66  | 0.175                             | 8.881              | 0.331   | 7.714           | 8.654  | 8.927           | 9.113                   | 9.756   |
| CREB1   | Tnidfj5fKhIPFUI34k |            | rs2551949                    | 10.71                     | 10.22                | 0.205                    | 2.03                          | 14.28  | 0.17                              | 8.881              | 0.331   | 7.714           | 8.654  | 8.927           | 9.113                   | 9.756   |
| CRELD1  | uCcf1SpzOkJC2QJ6JU |            | rs6800204                    | 3.74                      | 3.58                 | 0.071                    | 0.64                          | 8.69   | 0.201                             | 7.682              | 0.235   | 7.221           | 7.534  | 7.638           | 7.799                   | 8.91    |
| CRELD1  | uCcf1SpzOkJC2QJ6JU |            | rs4488814                    | 3.59                      | 3.43                 | -0.067                   | 0.64                          | 15.68  | 0.205                             | 7.682              | 0.235   | 7.221           | 7.534  | 7.638           | 7.799                   | 8.91    |
| CRELD2  | Kz0go7VugDuleKOW3U |            | rs910799                     | 3.59                      | 3.44                 | -0.067                   | 0.62                          | -33.78 | 0.19                              | 10.36              | 0.254   | 9.636           | 10.202 | 10.373          | 10.518                  | 11.27   |
| CRELD2  | Kz0go7VugDuleKOW3U |            | rs7410537                    | 5.34                      | 5.11                 | -0.105                   | 0.54                          | -3.85  | 0.185                             | 10.36              | 0.254   | 9.636           | 10.202 | 10.373          | 10.518                  | 11.27   |
| CRIP2   | QUXILvPznV9urjpRlc |            | rs4983411                    | 4                         | 3.83                 | -0.074                   | 2.4                           | -24.33 | 0.325                             | 9.658              | 0.645   | 7.54            | 9.264  | 9.733           | 10.134                  | 11.037  |
| CRIP2   | QUXILvPznV9urjpRlc |            | rs1451152                    | 8.7                       | 8.30                 | 0.175                    | 0.73                          | -44.16 | 0.3475                            | 9.129              | 0.305   | 8.219           | 8.899  | 9.141           | 9.331                   | 10.315  |
| CRIP2   | QUXILvPznV9urjpRlc |            | rs1451156                    | 7.99                      | 7.63                 | 0.153                    | 1.03                          | -11.71 | 0.4875                            | 9.129              | 0.305   | 8.219           | 8.899  | 9.141           | 9.331                   | 10.315  |
| CRIP2   | QUXILvPznV9urjpRlc |            | rs1531133                    | 12.21                     | 11.65                | 0.231                    | 1.68                          | -0.68  | 0.395                             | 9.129              | 0.305   | 8.219           | 8.899  | 9.141           | 9.331                   | 10.315  |
| CRIP2   | QUXILvPznV9urjpRlc |            | rs2122715                    | 6.81                      | 6.51                 | 0.132                    | 1.43                          | 1.54   | 0.3015                            | 9.129              | 0.305   | 8.219           | 8.899  | 9.141           | 9.331                   | 10.315  |
| CRIP2   | QUXILvPznV9urjpRlc |            | rs6735530                    | 3.36                      | 3.22                 | -0.061                   | 1.02                          | -3.74  | 0.1325                            | 9.129              | 0.305   | 8.219           | 8.899  | 9.141           | 9.331                   | 10.315  |
| CRIP2   | QUXILvPznV9urjpRlc |            | rs12105006                   | 9.02                      | 8.61                 | -0.171                   | 1.41                          | 10.4   | 0.29                              | 9.129              | 0.305   | 8.219           | 8.899  | 9.141           | 9.331                   | 10.315  |
| CRIP2   | QUXILvPznV9urjpRlc |            | rs17768132                   | 7.43                      | 7.10                 | 0.142                    | 1.16                          | 11.06  | 0.28                              | 9.129              | 0.305   | 8.219           | 8.899  | 9.141           | 9.331                   | 10.315  |
| CRIP2   | QUXILvPznV9urjpRlc |            | rs3814042                    | 5.86                      | 5.60                 | 0.116                    | 0.12                          | 25.07  | 0.175                             | 9.129              | 0.305   | 8.219           | 8.899  | 9.141           | 9.331                   | 10.315  |
| CRISP2  | ukOTfdVSNNEgNH9KQ4 |            | rs6935473                    | 3.3                       | 3.17                 | -0.066                   | 0.04                          | 41.44  | 0.3075                            | 7.135              | 0.063   | 7.099           | 7.112  | 7.119           | 7.131                   | 7.725   |
| CRNK1   | uScea7SNH3Ysit5cul |            | rs6132261                    | 5.04                      | 4.82                 | -0.098                   | 0.22                          | -0.06  | 0.2125                            | 7.867              | 0.202   | 7.195           | 7.747  | 7.895           | 8.003                   | 8.355   |
| CRNK1   | uScea7SNH3Ysit5cul |            | rs13037134                   | 7.96                      | 7.60                 | -0.158                   | 2.2                           | 2.63   | 0.4                               | 7.867              | 0.202   | 7.195           | 7.747  | 7.895           | 8.003                   | 8.355   |
| CRNK1   | uScea7SNH3Ysit5cul |            | rs2073123                    | 6.37                      | 6.09                 | -0.126                   | 1.44                          | -5.82  | 0.4475                            | 7.867              | 0.202   | 7.195           | 7.747  | 7.895           | 8.003                   | 8.355   |
| CRNK1   | uScea7SNH3Ysit5cul |            | rs2255255                    | 6.22                      | 5.94                 | -0.123                   | 1.5                           | -3.69  | 0.445                             | 7.867              | 0.202   | 7.195           | 7.747  | 7.895           | 8.003                   | 8.355   |
| CRNK1   | uScea7SNH3Ysit5cul |            | rs2273058                    | 6.13                      | 5.86                 | 0.123                    | 1.48                          | -3.37  | 0.4416                            | 7.867              | 0.202   | 7.195           | 7.747  | 7.895           | 8.003                   | 8.355   |
| CRNK1   | uScea7SNH3Ysit5cul |            | rs6081854                    | 3.81                      | 3.65                 | -0.074                   | 1.34                          | 6.19   | 0.4898                            | 7.867              | 0.202   | 7.195           | 7.747  | 7.895           | 8.003                   | 8.355   |
| CRNK1   | uScea7SNH3Ysit5cul |            | rs6136938                    | 6.22                      | 5.94                 | -0.121                   | 2.06                          | 22.3   | 0.3925                            | 7.867              | 0.202   | 7.195           | 7.747  | 7.895           | 8.003                   | 8.355   |
| CRNK1   | uScea7SNH3Ysit5cul |            | rs6081869                    | 3.73                      | 3.57                 | -0.073                   | 1.08                          | 24.05  | 0.3384                            | 7.867              | 0.202   | 7.195           | 7.747  | 7.895           | 8.003                   | 8.355   |
| CRYZ    | WTz6_niDhVM73uIMsk |            | rs2032968                    | 6.74                      | 6.44                 | 0.135                    | 2.38                          | 4.01   | 0.49                              | 9.952              | 0.481   | 8.73            | 9.619  | 9.996           | 10.324                  | 10.973  |
| CRYZ    | WTz6_niDhVM73uIMsk |            | rs7522428                    | 11.54                     | 11.01                | -0.224                   | 5.35                          | 7.18   | 0.275                             | 9.952              | 0.481   | 8.73            | 9.619  | 9.996           | 10.324                  | 10.973  |
| CRYZ    | WTz6_niDhVM73uIMsk |            | rs10890142                   | 11.54                     | 11.01                | 0.224                    | 5.16                          | 7.95   | 0.275                             | 9.952              | 0.481   | 8.73            | 9.619  | 9.996           | 10.324                  | 10.973  |
| CRYZ    | WTz6_niDhVM73uIMsk |            | rs1409785                    | 13.75                     | 13.11                | 0.271                    | 4.07                          | 49.4   | 0.405                             | 9.952              | 0.481   | 8.73            | 9.619  | 9.996           | 10.324                  | 10.973  |
| CSE1L   | rBVAPRekSofRC_3F14 |            | rs1556876                    | 3.44                      | 3.30                 | -0.063                   | 3.71                          | 2.96   | 0.1925                            | 9.972              | 0.181   | 9.073           | 9.88   | 9.994           | 10.086                  | 10.354  |
| CSNK1G1 | 36veM7jdlsIT9cqrTo |            | rs12591947                   | 3.62                      | 3.46                 | 0.074                    | 3.64                          | -21.26 | 0.2875                            | 9.21               | 0.265   | 8.139           | 9.051  | 9.252           | 9.405                   | 9.833   |
| CSTA    | fl1_9XunnjBUE9TdxU |            | rs6798997                    | 3.51                      | 3.36                 | -0.065                   | 2.59                          | 13.89  | 0.4575                            | 7.565              | 0.474   | 7.106           | 7.204  | 7.374           | 7.79                    | 9.529   |
| CTBP1   | KghpNGCSdQCgCfqa5U |            | rs1250126                    | 4.27                      | 4.09                 | 0.079                    | 1.31                          | -14.19 | 0.325                             | 10.919             | 0.288   | 9.373           | 10.767 | 10.932          | 11.058                  | 12.243  |
| CTBP1   | KghpNGCSdQCgCfqa5U |            | rs1250105                    | 4.4                       | 4.21                 | 0.082                    | 1.46                          | -1.96  | 0.43                              | 10.919             | 0.288   | 9.373           | 10.767 | 10.932          | 11.058                  | 12.243  |
| CTBP1   | KghpNGCSdQCgCfqa5U |            | rs2291199                    | 4.57                      | 4.37                 | 0.083                    | 0.56                          | 1.36   | 0.46                              | 10.919             | 0.288   | 9.373           | 10.767 | 10.932          | 11.058                  | 12.243  |
| CTBP1   | KghpNGCSdQCgCfqa5U |            | rs2279281                    | 4.27                      | 4.08                 | -0.079                   | 0.74                          | 2.37   | 0.4695                            | 10.919             | 0.288   | 9.373           | 10.767 | 10.932          | 11.058                  | 12.243  |
| CTBP1   | KghpNGCSdQCgCfqa5U |            | rs1732103                    | 4.81                      | 4.60                 | 0.091                    | 0.76                          | 34.92  | 0.392                             | 10.919             | 0.288   | 9.373           | 10.767 | 10.932          | 11.058                  | 12.243  |
| CTBP1   | KghpNGCSdQCgCfqa5U |            | rs11727167                   | 4.96                      | 4.74                 | 0.091                    | 0.55                          | 42.61  | 0.47                              | 10.919             | 0.288   | 9.373           | 10.767 | 10.932          | 11.058                  | 12.243  |
| CTH     | fRHj2H97qfio4olXH0 |            | rs7523188                    | 4                         | 3.83                 | -0.073                   | 1.1                           | -18.52 | 0.1834                            | 7.425              | 0.126   | 7.177           | 7.352  | 7.416           | 7.498                   | 7.784   |
| CTH     | fRHj2H97qfio4olXH0 |            | rs4650044                    | 8.82                      | 8.42                 | -0.167                   | 1.48                          | -17.56 | 0.3625                            | 7.425              | 0.126   | 7.177           | 7.352  | 7.416           | 7.498                   | 7.784   |
| CTH     | fRHj2H97qfio4olXH0 |            | rs648743                     | 9.5                       | 9.07                 | 0.181                    | 1.86                          | -1.18  | 0.3568                            | 7.425              | 0.126   | 7.177           | 7.352  | 7.416           | 7.498                   | 7.784   |
| CTNNAL1 | 0nq.nRd4Z4eYD4guol |            | rs12555920                   | 8.86                      | 8.45                 | 0.178                    | 2.72                          | -10.03 | 0.0905                            | 7.36               | 0.187   | 7.103           | 7.256  | 7.32            | 7.404                   | 8.287   |
| CTNNAL1 | 0nq.nRd4Z4eYD4guol |            | rs534286                     | 7.2                       | 6.88                 | 0.142                    | 4.54                          | 24.47  | 0.2588                            | 7.36               | 0.187   | 7.103           | 7.256  | 7.32            | 7.404                   | 8.287   |
| CTSB    | N1HteUKxF0sdV9UHgs |            | rs1296028                    | 3.36                      | 3.22                 | -0.061                   | 1.48                          | -1.29  | 0.2425                            | 10.135             | 0.456   | 8.355           | 9.83   | 10.109          | 10.442                  | 12.148  |
| CTSC    | WSXeo6PHo_8AEnqkWK |            | rs217116                     | 3.55                      | 3.40                 | 0.066                    | 1.47                          | 6.9    | 0.175                             | 9.766              | 0.503   | 8.039           | 9.431  | 9.804           | 10.091                  | 10.942  |
| CTSC    | WSXeo6PHo_8AEnqkWK |            | rs217086                     | 3.36                      | 3.21                 | 0.062                    | 1.58                          | 18.82  | 0.1784                            | 9.766              | 0.503   | 8.039           | 9.431  | 9.804           | 10.091                  | 10.942  |
| CTSK    | 9KcljuHEI5v4e77Vkk |            | rs10888390                   | 6.07                      | 5.80                 | -0.115                   | 1.85                          | -41.15 | 0.3675                            | 7.947              | 0.318   | 7.363           | 7.694  | 7.902           | 8.146                   | 9.248   |
| CTSL    | 6KD030txSVWe7aMRHY |            | rs3118853                    | 8.31                      | 7.94                 | -0.169                   | 1.36                          | -47.63 | 0.3825                            | 8.965              | 0.487   | 7.494           | 8.649  | 8.954           | 9.3                     | 10.218  |
| CTSL    | 6KD030txSVWe7aMRHY |            | rs3128479                    | 17.31                     | 16.50                | -0.327                   | 3.73                          | -43.3  | 0.4725                            | 8.965              | 0.487   | 7.494           | 8.649  | 8.954           | 9.3                     | 10.218  |
| CTSL    | 6KD030txSVWe7aMRHY |            | rs3128495                    | 17.04                     | 16.24                | -0.325                   | 4.05                          | -27.26 | 0.4447                            | 8.965              | 0.487   | 7.494           | 8.649  | 8.954           | 9.3                     | 10.218  |
| CTSL    | 6KD030txSVWe7aMRHY |            | rs3118860                    | 17.52                     | 16.70                | -0.33                    | 4.12                          | -21.57 | 0.4475                            | 8.965              | 0.487   | 7.494           | 8.649  | 8.954           | 9.3                     | 10.218  |
| CTSL    | 6KD030txSVWe7aMRHY |            | rs3118862                    | 16.91                     | 16.12                | -0.324                   | 4.35                          | -21.07 | 0.4774                            | 8.965              | 0.487   | 7.494           | 8.649  | 8.954           | 9.3                     | 10.218  |
| CTSL    | 6KD030txSVWe7aMRHY |            | rs1056719                    | 16.59                     | 15.82                | 0.313                    | 4.62                          | -18.96 | 0.3825                            | 8.965              | 0.487   | 7.494           | 8.649  | 8.954           | 9.3                     | 10.218  |
| CTSL    | 6KD030txSVWe7aMRHY |            | rs3118866                    | 23.3                      | 22.20                | 0.417                    | 4.89                          | -16.78 | 0.4675                            | 8.965              | 0.487   | 7.494           | 8.649  | 8.954           | 9.3                     | 10.218  |
| CTSL    | TekGlm3FWB3nfpuiqA |            | rs3118866                    | 3.39                      | 3.25                 | 0.063                    | 2.62                          | -16.78 | 0.4675                            | 7.289              | 0.086   | 7.129           | 7.229  | 7.277           | 7.343                   | 7.692   |
| CTSL    | 6KD030txSVWe7aMRHY |            | rs4877370                    | 18.18                     | 17.33                | 0.34                     | 5.33                          | -12.5  | 0.397                             | 8.965              | 0.487   | 7.494           | 8.649  | 8.954           | 9.3                     | 10.218  |
| CTSL    | 6KD030txSVWe7aMRHY |            | rs3128501                    | 18.76                     | 17.88                | 0.348                    | 5.23                          | -11.84 | 0.435                             | 8.965              | 0.487   | 7.494           | 8.649  | 8.954           | 9.3                     | 10.218  |
| CTSL    | 6KD030txSVWe7aMRHY |            | rs3128506                    | 20.02                     | 19.08                | -0.37                    | 4.9                           | -6.45  | 0.48                              | 8.965              | 0.487   | 7.494           | 8.649  | 8.954           | 9.3                     | 10.218  |
| CTSL    | 6KD030txSVWe7aMRHY |            | rs2274611                    | 22.59                     | 21.52                | -0.407                   | 4.67                          | 1.7    | 0.465                             | 8.965              | 0.487   | 7.494           | 8.649  | 8.954           | 9.3                     | 10.218  |

| Symbol  | Lumi nuID           | SNP        | Population-based | Population-based          | % Variance | Distance from   | MAF    | Mean      | Transcript abundance (log2 scale) |            |            |            |            | SNP mapping under probe |         |
|---------|---------------------|------------|------------------|---------------------------|------------|-----------------|--------|-----------|-----------------------------------|------------|------------|------------|------------|-------------------------|---------|
|         |                     |            | association      | association               |            |                 |        |           | Standard                          | Minimum    | 25th       | Median     | 75th       |                         | Maximum |
|         |                     |            | p-value (-log10) | p-value (-log10), GC adj. | Explained  | transcript (kb) |        | Deviation |                                   | percentile | percentile | percentile | percentile |                         |         |
| CTSL    | TekGim3FWB3npfiuqA  | rs2274611  | 3.82             | 3.66                      | -0.072     | 1.64            | 0.465  | 7.289     | 0.086                             | 7.129      | 7.229      | 7.277      | 7.343      | 7.692                   |         |
| CTSL    | 6KD030txSVWe7aMRHY  | rs2378757  | 13.7             | 13.06                     | -0.268     | 4.13            | -2.53  | 0.3744    | 0.487                             | 7.494      | 8.649      | 8.954      | 9.3        | 10.218                  |         |
| CTSL    | 6KD030txSVWe7aMRHY  | rs3128511  | 19.59            | 18.67                     | -0.363     | 4.29            | 1.14   | 0.475     | 0.487                             | 7.494      | 8.649      | 8.954      | 9.3        | 10.218                  |         |
| CTSL    | 6KD030txSVWe7aMRHY  | rs1927979  | 22.42            | 21.36                     | 0.405      | 4.64            | 1.48   | 0.4598    | 0.487                             | 7.494      | 8.649      | 8.954      | 9.3        | 10.218                  |         |
| CTSL    | TekGim3FWB3npfiuqA  | rs1927979  | 3.63             | 3.48                      | 0.067      | 1.57            | 1.48   | 0.4598    | 0.086                             | 7.129      | 7.229      | 7.277      | 7.343      | 7.692                   |         |
| CTSL    | 6KD030txSVWe7aMRHY  | rs1927970  | 14.55            | 13.87                     | 0.289      | 4.09            | 9.1    | 0.4848    | 0.487                             | 7.494      | 8.649      | 8.954      | 9.3        | 10.218                  |         |
| CTSL    | 6KD030txSVWe7aMRHY  | rs3128516  | 20.7             | 19.72                     | 0.382      | 3.76            | 9.51   | 0.4596    | 0.487                             | 7.494      | 8.649      | 8.954      | 9.3        | 10.218                  |         |
| CTSL    | 6KD030txSVWe7aMRHY  | rs3118839  | 13.9             | 13.26                     | 0.271      | 3.87            | 16.47  | 0.4698    | 0.487                             | 7.494      | 8.649      | 8.954      | 9.3        | 10.218                  |         |
| CTSL    | 6KD030txSVWe7aMRHY  | rs2149383  | 7.01             | 6.70                      | -0.143     | 1.55            | 23.8   | 0.4397    | 0.487                             | 7.494      | 8.649      | 8.954      | 9.3        | 10.218                  |         |
| CTSL    | 6KD030txSVWe7aMRHY  | rs2149384  | 7.48             | 7.14                      | 0.149      | 2.02            | 24.03  | 0.3675    | 0.487                             | 7.494      | 8.649      | 8.954      | 9.3        | 10.218                  |         |
| CTSL    | 6KD030txSVWe7aMRHY  | rs943856   | 7.67             | 7.32                      | 0.152      | 2.13            | 24.2   | 0.375     | 0.487                             | 7.494      | 8.649      | 8.954      | 9.3        | 10.218                  |         |
| CTSW    | WdfJjVfVVK_VNdUNOM  | rs568617   | 17.35            | 16.54                     | -0.328     | 4.03            | 2.03   | 0.165     | 0.559                             | 7.122      | 8.688      | 9.084      | 9.399      | 10.433                  |         |
| CTSW    | WdfJjVfVVK_VNdUNOM  | rs622614   | 17.54            | 16.72                     | -0.334     | 3.8             | 12.03  | 0.1675    | 0.559                             | 7.122      | 8.688      | 9.084      | 9.399      | 10.433                  |         |
| CUBN    | 3oSR3INeMThV545Rlg  | rs2796832  | 3.49             | 3.34                      | 0.064      | 0.13            | 59.35  | 0.2325    | 0.356                             | 7.225      | 7.551      | 7.769      | 8.105      | 8.938                   |         |
| CUBN    | 3oSR3INeMThV545Rlg  | rs780849   | 3.49             | 3.34                      | 0.064      | 0.13            | 60.2   | 0.2325    | 0.356                             | 7.225      | 7.551      | 7.769      | 8.105      | 8.938                   |         |
| CUBN    | 3oSR3INeMThV545Rlg  | rs809698   | 3.4              | 3.26                      | 0.062      | 0.02            | 60.5   | 0.2375    | 0.356                             | 7.225      | 7.551      | 7.769      | 8.105      | 8.938                   |         |
| CUBN    | 3oSR3INeMThV545Rlg  | rs780816   | 3.58             | 3.43                      | 0.065      | 0.05            | 71.71  | 0.2325    | 0.356                             | 7.225      | 7.551      | 7.769      | 8.105      | 8.938                   |         |
| CUBN    | 3oSR3INeMThV545Rlg  | rs7916688  | 3.33             | 3.19                      | 0.061      | 0.52            | -4.37  | 0.31      | 0.356                             | 7.225      | 7.551      | 7.769      | 8.105      | 8.938                   |         |
| CYP46A1 | HhRHs24u1vhuFD5XII  | rs7157032  | 3.45             | 3.30                      | -0.067     | 1.28            | -8.62  | 0.44      | 0.048                             | 7.099      | 7.125      | 7.145      | 7.174      | 7.381                   |         |
| CYP4V2  | Bsl6lPwhKprdJQPkVM  | rs1473597  | 3.43             | 3.28                      | -0.062     | 0.84            | -6.8   | 0.3975    | 0.302                             | 8.205      | 8.799      | 9.016      | 9.206      | 9.716                   |         |
| CYP4V2  | Bsl6lPwhKprdJQPkVM  | rs2276917  | 3.43             | 3.28                      | -0.062     | 0.85            | -4.62  | 0.3975    | 0.302                             | 8.205      | 8.799      | 9.016      | 9.206      | 9.716                   |         |
| CYP8B1  | fn97t_v3l55UfvyHok  | rs9861236  | 3.55             | 3.40                      | 0.07       | 1.31            | -33.19 | 0.075     | 0.133                             | 7.105      | 7.121      | 7.128      | 7.141      | 7.3                     |         |
| CYTH3   | Hlx_UiEiIKK54qivY   | rs9648587  | 3.39             | 3.25                      | -0.065     | 0.88            | -27.03 | 0.125     | 0.281                             | 0.071      | 7.136      | 7.23       | 7.275      | 7.329                   | 7.578   |
| CYYR1   | Tgll0tRFN33_L786XU  | rs2830304  | 3.53             | 3.38                      | -0.066     | 3.15            | 34.34  | 0.2186    | 0.075                             | 7.101      | 7.119      | 7.135      | 7.173      | 7.771                   |         |
| D4S234E | B_mSa7k0im7nCrrvA   | rs4689307  | 5.57             | 5.33                      | -0.108     | 3.62            | -45.49 | 0.47      | 0.892                             | 0.63       | 8.196      | 9.457      | 10.034     | 10.327                  | 11.253  |
| D4S234E | B_mSa7k0im7nCrrvA   | rs10027109 | 20.02            | 19.08                     | -0.364     | 8.11            | -42.52 | 0.39      | 0.892                             | 0.63       | 8.196      | 9.457      | 10.034     | 10.327                  | 11.253  |
| D4S234E | B_mSa7k0im7nCrrvA   | rs16835627 | 11.1             | 10.59                     | -0.213     | 6.98            | -42.21 | 0.45      | 0.892                             | 0.63       | 8.196      | 9.457      | 10.034     | 10.327                  | 11.253  |
| D4S234E | B_mSa7k0im7nCrrvA   | rs4689316  | 14.74            | 14.05                     | 0.28       | 2.56            | -41.25 | 0.185     | 0.892                             | 0.63       | 8.196      | 9.457      | 10.034     | 10.327                  | 11.253  |
| D4S234E | B_mSa7k0im7nCrrvA   | rs13434731 | 6.54             | 6.25                      | 0.126      | 4.46            | -39.88 | 0.4625    | 0.892                             | 0.63       | 8.196      | 9.457      | 10.034     | 10.327                  | 11.253  |
| D4S234E | B_mSa7k0im7nCrrvA   | rs6843595  | 19.96            | 19.02                     | -0.36      | 3.81            | -37.02 | 0.2375    | 0.892                             | 0.63       | 8.196      | 9.457      | 10.034     | 10.327                  | 11.253  |
| D4S234E | B_mSa7k0im7nCrrvA   | rs2369105  | 19.73            | 18.80                     | 0.358      | 3.44            | -35.67 | 0.2387    | 0.892                             | 0.63       | 8.196      | 9.457      | 10.034     | 10.327                  | 11.253  |
| D4S234E | B_mSa7k0im7nCrrvA   | rs6446632  | 7.28             | 6.95                      | -0.143     | 0.54            | -33.37 | 0.24      | 0.892                             | 0.63       | 8.196      | 9.457      | 10.034     | 10.327                  | 11.253  |
| D4S234E | B_mSa7k0im7nCrrvA   | rs4689329  | 6.08             | 5.81                      | 0.122      | 1.26            | -30.04 | 0.2375    | 0.892                             | 0.63       | 8.196      | 9.457      | 10.034     | 10.327                  | 11.253  |
| D4S234E | B_mSa7k0im7nCrrvA   | rs7698300  | 6.52             | 6.23                      | -0.128     | 1.67            | -28.09 | 0.355     | 0.892                             | 0.63       | 8.196      | 9.457      | 10.034     | 10.327                  | 11.253  |
| D4S234E | B_mSa7k0im7nCrrvA   | rs3792686  | 3.38             | 3.24                      | -0.065     | 2.69            | 4.32   | 0.4875    | 0.892                             | 0.63       | 8.196      | 9.457      | 10.034     | 10.327                  | 11.253  |
| D4S234E | B_mSa7k0im7nCrrvA   | rs10017186 | 3.4              | 3.25                      | -0.065     | 0.69            | 5.87   | 0.245     | 0.892                             | 0.63       | 8.196      | 9.457      | 10.034     | 10.327                  | 11.253  |
| DAAM1   | 3i7p0.39VgZTh7OgkQ  | rs10083442 | 3.64             | 3.48                      | -0.066     | 0.87            | -5.59  | 0.135     | 0.857                             | 0.253      | 7.378      | 8.356      | 8.508      | 8.647                   | 9.334   |
| DAGLB   | Neneq2lLo9KL4BDAmY  | rs10951983 | 4.87             | 4.65                      | 0.097      | 1.69            | -2.73  | 0.175     | 0.801                             | 0.372      | 8.922      | 9.537      | 9.792      | 10.031                  | 10.825  |
| DAGLB   | Neneq2lLo9KL4BDAmY  | rs2303361  | 4.04             | 3.87                      | -0.08      | 1.67            | 0.74   | 0.1784    | 0.801                             | 0.372      | 8.922      | 9.537      | 9.792      | 10.031                  | 10.825  |
| DAOA    | 6DIP3ORUXpe7h6iDd0  | rs9301030  | 3.82             | 3.66                      | 0.074      | 0.12            | 7.72   | 0.3575    | 0.012                             | 7.096      | 7.107      | 7.112      | 7.119      | 7.166                   |         |
| DARS    | BvbSF1O9XbjVAYdHXw  | rs12472293 | 7.57             | 7.23                      | -0.167     | 3.02            | -16.18 | 0.145     | 12.355                            | 0.309      | 11.712     | 12.165     | 12.284     | 12.508                  | 14.203  |
| DARS    | BvbSF1O9XbjVAYdHXw  | rs309152   | 8.46             | 8.07                      | -0.179     | 3.36            | -7     | 0.1375    | 12.355                            | 0.309      | 11.712     | 12.165     | 12.284     | 12.508                  | 14.203  |
| DARS    | BvbSF1O9XbjVAYdHXw  | rs309160   | 6.6              | 6.30                      | 0.147      | 3               | 20.97  | 0.2625    | 12.355                            | 0.309      | 11.712     | 12.165     | 12.284     | 12.508                  | 14.203  |
| DARS    | BvbSF1O9XbjVAYdHXw  | rs309143   | 7.68             | 7.33                      | 0.17       | 3.09            | -29.04 | 0.1425    | 12.355                            | 0.309      | 11.712     | 12.165     | 12.284     | 12.508                  | 14.203  |
| DARS    | BvbSF1O9XbjVAYdHXw  | rs309137   | 6.21             | 5.93                      | -0.139     | 2.9             | 22.73  | 0.2675    | 12.355                            | 0.309      | 11.712     | 12.165     | 12.284     | 12.508                  | 14.203  |
| DBNDD1  | B0IK3X1ev1LREiVJJ8  | rs8049897  | 7.71             | 7.36                      | -0.152     | 1.07            | -47.08 | 0.1625    | 7.517                             | 0.299      | 7.119      | 7.327      | 7.436      | 7.641                   | 8.756   |
| DBNDD1  | B0IK3X1ev1LREiVJJ8  | rs3803684  | 9.24             | 8.82                      | -0.183     | 1.65            | -24.91 | 0.0675    | 7.517                             | 0.299      | 7.119      | 7.327      | 7.436      | 7.641                   | 8.756   |
| DBNDD1  | B0IK3X1ev1LREiVJJ8  | rs7498985  | 4.17             | 3.99                      | -0.081     | 1.57            | 26.59  | 0.4575    | 7.517                             | 0.299      | 7.119      | 7.327      | 7.436      | 7.641                   | 8.756   |
| DBNDD1  | B0IK3X1ev1LREiVJJ8  | rs9927964  | 7.95             | 7.60                      | -0.16      | 2.28            | 49.42  | 0.06      | 7.517                             | 0.299      | 7.119      | 7.327      | 7.436      | 7.641                   | 8.756   |
| DCBLD1  | QmX77Xrv56Dqif5c    | rs10782186 | 3.76             | 3.60                      | 0.07       | 2.53            | 19.69  | 0.4825    | 7.148                             | 0.034      | 7.098      | 7.126      | 7.139      | 7.16                    | 7.313   |
| DCBLD2  | QRf5Xp3k_0XliQitzi  | rs13084692 | 3.35             | 3.21                      | -0.062     | 0.37            | -11.08 | 0.0754    | 7.282                             | 0.125      | 7.121      | 7.198      | 7.254      | 7.328                   | 7.939   |
| DCLRE1A | flV5XU6kvM95NCXyCI  | rs10787503 | 3.48             | 3.33                      | 0.067      | 1.47            | -32.28 | 0.3825    | 7.941                             | 0.182      | 7.466      | 7.811      | 7.955      | 8.059                   | 8.528   |
| DCLRE1A | flV5XU6kvM95NCXyCI  | rs7071839  | 3.5              | 3.35                      | 0.067      | 1.58            | -28.49 | 0.39      | 7.941                             | 0.182      | 7.466      | 7.811      | 7.955      | 8.059                   | 8.528   |
| DCLRE1B | NXXKdg3ukV4kPHwPuiU | rs17464525 | 3.52             | 3.37                      | -0.066     | 1.25            | -4.14  | 0.2025    | 7.495                             | 0.163      | 7.184      | 7.385      | 7.457      | 7.587                   | 8.007   |
| DCLRE1B | NXXKdg3ukV4kPHwPuiU | rs878129   | 11.97            | 11.42                     | 0.236      | 6.03            | 2.5    | 0.2725    | 7.495                             | 0.163      | 7.184      | 7.385      | 7.457      | 7.587                   | 8.007   |
| DCLRE1B | NXXKdg3ukV4kPHwPuiU | rs11102703 | 10.37            | 9.90                      | -0.207     | 6.15            | 9.42   | 0.3       | 7.495                             | 0.163      | 7.184      | 7.385      | 7.457      | 7.587                   | 8.007   |
| DCLRE1B | NXXKdg3ukV4kPHwPuiU | rs1503832  | 9.84             | 9.39                      | -0.2       | 4.86            | 32.99  | 0.2875    | 7.495                             | 0.163      | 7.184      | 7.385      | 7.457      | 7.587                   | 8.007   |
| DCLRE1B | NXXKdg3ukV4kPHwPuiU | rs12127377 | 10.27            | 9.80                      | 0.207      | 4.55            | 33.28  | 0.265     | 7.495                             | 0.163      | 7.184      | 7.385      | 7.457      | 7.587                   | 8.007   |
| DCTN5   | 9sVEiHil6566_66SOM  | rs420259   | 6.48             | 6.19                      | 0.127      | 2.03            | -18.78 | 0.3       | 10.474                            | 0.245      | 9.852      | 10.312     | 10.457     | 10.609                  | 11.218  |
| DCTN5   | 9sVEiHil6566_66SOM  | rs8043812  | 5.68             | 5.43                      | 0.113      | 1.94            | 9.99   | 0.1375    | 10.474                            | 0.245      | 9.852      | 10.312     | 10.457     | 10.609                  | 11.218  |
| DCTN5   | 9sVEiHil6566_66SOM  | rs249869   | 10.75            | 10.25                     | 0.219      | 3.05            | 13.75  | 0.27      | 10.474                            | 0.245      | 9.852      | 10.312     | 10.457     | 10.609                  | 11.218  |
| DCTN5   | 9sVEiHil6566_66SOM  | rs34514    | 12.73            | 12.14                     | -0.25      | 4.42            | -10.59 | 0.22      | 10.474                            | 0.245      | 9.852      | 10.312     | 10.457     | 10.609                  | 11.218  |

| Symbol  | Lumi nuID          | SNP        | Population-based association p-value (-log10) | Population-based association p-value (-log10), GC adj. | % Variance Explained | Family-based association p-value (-log10) | Distance from transcript (kb) | MAF    | Mean   | Transcript abundance (log2 scale) |         |                 |        |                 | SNP mapping under probe |         |
|---------|--------------------|------------|-----------------------------------------------|--------------------------------------------------------|----------------------|-------------------------------------------|-------------------------------|--------|--------|-----------------------------------|---------|-----------------|--------|-----------------|-------------------------|---------|
|         |                    |            |                                               |                                                        |                      |                                           |                               |        |        | Standard Deviation                | Minimum | 25th percentile | Median | 75th percentile |                         | Maximum |
| DCTN5   | 9sVEiHIL6566_66SOM | rs35633    | 11.11                                         | 10.60                                                  | 0.22                 | 3.93                                      | 22.82                         | 0.22   | 10.474 | 0.245                             | 9.852   | 10.312          | 10.457 | 10.609          | 11.218                  |         |
| DCTN5   | 9sVEiHIL6566_66SOM | rs26762    | 8.32                                          | 7.95                                                   | 0.165                | 2.58                                      | 31.27                         | 0.2525 | 10.474 | 0.245                             | 9.852   | 10.312          | 10.457 | 10.609          | 11.218                  |         |
| DCXR    | 3ERdCVTIudNcVUNXUM | rs4969481  | 7.22                                          | 6.90                                                   | 0.142                | 4.15                                      | -0.55                         | 0.1583 | 10.13  | 0.41                              | 9.228   | 9.82            | 10.107 | 10.429          | 11.159                  |         |
| DDA1    | 05GRvqjC2lfqN.d_LQ | rs971694   | 4.02                                          | 3.85                                                   | -0.08                | 3.22                                      | 2.48                          | 0.15   | 10.371 | 0.196                             | 9.675   | 10.268          | 10.387 | 10.506          | 10.996                  |         |
| DDA1    | 05GRvqjC2lfqN.d_LQ | rs1529482  | 3.86                                          | 3.69                                                   | 0.075                | 3.46                                      | 10.39                         | 0.395  | 10.371 | 0.196                             | 9.675   | 10.268          | 10.387 | 10.506          | 10.996                  |         |
| DDO     | ZYu7U5XShVT1QtAXsg | rs6933664  | 3.6                                           | 3.44                                                   | -0.071               | 0.45                                      | -0.37                         | 0.3788 | 7.134  | 0.024                             | 7.102   | 7.118           | 7.128  | 7.143           | 7.26                    |         |
| DDT     | x1n.1X6LXpl_klyoa0 | rs6003959  | 7.36                                          | 7.03                                                   | -0.146               | 1.75                                      | -49.16                        | 0.27   | 11.861 | 0.286                             | 11.026  | 11.69           | 11.859 | 12.029          | 12.545                  |         |
| DDT     | x1n.1X6LXpl_klyoa0 | rs4822458  | 3.89                                          | 3.72                                                   | 0.075                | 1.35                                      | -47.9                         | 0.4975 | 11.861 | 0.286                             | 11.026  | 11.69           | 11.859 | 12.029          | 12.545                  |         |
| DDT     | x1n.1X6LXpl_klyoa0 | rs1006771  | 6.35                                          | 6.07                                                   | 0.127                | 1.71                                      | 0.45                          | 0.3875 | 11.861 | 0.286                             | 11.026  | 11.69           | 11.859 | 12.029          | 12.545                  |         |
| DDT     | x1n.1X6LXpl_klyoa0 | rs6004011  | 7.82                                          | 7.47                                                   | 0.152                | 2.75                                      | 16.05                         | 0.1575 | 11.861 | 0.286                             | 11.026  | 11.69           | 11.859 | 12.029          | 12.545                  |         |
| DDX11   | B_SVeSgItKukV5hSfc | rs10771794 | 4.64                                          | 4.44                                                   | 0.092                | 0.48                                      | -43.69                        | 0.455  | 7.133  | 0.034                             | 7.097   | 7.111           | 7.122  | 7.143           | 7.299                   | Yes     |
| DDX43   | fqZGolkqKHrv1PEH_E | rs526434   | 5.49                                          | 5.25                                                   | 0.097                | 1.75                                      | -46.47                        | 0.4875 | 7.408  | 0.138                             | 7.14    | 7.309           | 7.387  | 7.486           | 7.888                   |         |
| DDX43   | fqZGolkqKHrv1PEH_E | rs311686   | 5.17                                          | 4.95                                                   | 0.09                 | 1.17                                      | -1.2                          | 0.4575 | 7.408  | 0.138                             | 7.14    | 7.309           | 7.387  | 7.486           | 7.888                   |         |
| DDX43   | fqZGolkqKHrv1PEH_E | rs311684   | 4.25                                          | 4.06                                                   | 0.073                | 1                                         | -0.99                         | 0.445  | 7.408  | 0.138                             | 7.14    | 7.309           | 7.387  | 7.486           | 7.888                   |         |
| DDX55   | K10s30pP4XXg7n6V6k | rs4310694  | 4.95                                          | 4.73                                                   | 0.098                | 1.75                                      | -35.91                        | 0.355  | 10.236 | 0.274                             | 9.553   | 10.069          | 10.239 | 10.391          | 11.399                  |         |
| DDX55   | K10s30pP4XXg7n6V6k | rs786448   | 7.73                                          | 7.39                                                   | 0.159                | 2.9                                       | -16.46                        | 0.4447 | 10.236 | 0.274                             | 9.553   | 10.069          | 10.239 | 10.391          | 11.399                  |         |
| DDX55   | K10s30pP4XXg7n6V6k | rs4930713  | 3.4                                           | 3.25                                                   | 0.065                | 1.52                                      | -6.05                         | 0.32   | 10.236 | 0.274                             | 9.553   | 10.069          | 10.239 | 10.391          | 11.399                  |         |
| DDX55   | K10s30pP4XXg7n6V6k | rs3748269  | 7.84                                          | 7.49                                                   | 0.161                | 3.06                                      | -5.56                         | 0.4425 | 10.236 | 0.274                             | 9.553   | 10.069          | 10.239 | 10.391          | 11.399                  |         |
| DDX55   | K10s30pP4XXg7n6V6k | rs4930737  | 3.87                                          | 3.73                                                   | -0.074               | 0.99                                      | 34.12                         | 0.3075 | 10.236 | 0.274                             | 9.553   | 10.069          | 10.239 | 10.391          | 11.399                  |         |
| DDX55   | K10s30pP4XXg7n6V6k | rs7135624  | 5.57                                          | 5.31                                                   | -0.112               | 2.55                                      | 42.35                         | 0.4548 | 10.236 | 0.274                             | 9.553   | 10.069          | 10.239 | 10.391          | 11.399                  |         |
| DDX59   | feoz5AGLAIRKNT31V0 | rs11807125 | 3.38                                          | 3.24                                                   | -0.064               | 1.25                                      | -20.96                        | 0.3175 | 9.269  | 0.275                             | 8.289   | 9.133           | 9.295  | 9.44            | 9.798                   |         |
| DDX59   | feoz5AGLAIRKNT31V0 | rs2809346  | 5.06                                          | 4.84                                                   | 0.061                | 1.06                                      | -17.04                        | 0.495  | 9.269  | 0.275                             | 8.289   | 9.133           | 9.295  | 9.44            | 9.798                   |         |
| DDX59   | csuJEot_oYpch_NLIt | rs2809346  | 4.82                                          | 4.61                                                   | 0.095                | 1.47                                      | -17.04                        | 0.495  | 8.997  | 0.269                             | 7.509   | 8.875           | 9.061  | 9.164           | 9.492                   | Yes     |
| DDX59   | csuJEot_oYpch_NLIt | rs12126676 | 3.58                                          | 3.43                                                   | 0.069                | 3                                         | -12.43                        | 0.3525 | 8.997  | 0.269                             | 7.509   | 8.875           | 9.061  | 9.164           | 9.492                   | Yes     |
| DDX59   | feoz5AGLAIRKNT31V0 | rs12126676 | 3.56                                          | 3.41                                                   | 0.068                | 1.13                                      | -12.43                        | 0.3525 | 9.269  | 0.275                             | 8.289   | 9.133           | 9.295  | 9.44            | 9.798                   |         |
| DDX59   | csuJEot_oYpch_NLIt | rs4437908  | 7.18                                          | 6.86                                                   | -0.147               | 3.46                                      | 9.31                          | 0.3794 | 8.997  | 0.269                             | 7.509   | 8.875           | 9.061  | 9.164           | 9.492                   | Yes     |
| DDX59   | feoz5AGLAIRKNT31V0 | rs4437908  | 6.32                                          | 6.04                                                   | -0.128               | 2.51                                      | 9.31                          | 0.3794 | 9.269  | 0.275                             | 8.289   | 9.133           | 9.295  | 9.44            | 9.798                   |         |
| DDX59   | csuJEot_oYpch_NLIt | rs12082129 | 4.38                                          | 4.19                                                   | -0.087               | 2.76                                      | 11.36                         | 0.299  | 8.997  | 0.269                             | 7.509   | 8.875           | 9.061  | 9.164           | 9.492                   | Yes     |
| DDX59   | feoz5AGLAIRKNT31V0 | rs12082129 | 3.48                                          | 3.33                                                   | -0.066               | 1.19                                      | 11.36                         | 0.299  | 9.269  | 0.275                             | 8.289   | 9.133           | 9.295  | 9.44            | 9.798                   |         |
| DDX59   | csuJEot_oYpch_NLIt | rs4915451  | 6.43                                          | 6.15                                                   | 0.13                 | 1.63                                      | 20.73                         | 0.45   | 8.997  | 0.269                             | 7.509   | 8.875           | 9.061  | 9.164           | 9.492                   | Yes     |
| DDX59   | feoz5AGLAIRKNT31V0 | rs4915451  | 5.26                                          | 5.03                                                   | 0.104                | 0.57                                      | 20.73                         | 0.45   | 9.269  | 0.275                             | 8.289   | 9.133           | 9.295  | 9.44            | 9.798                   |         |
| DECR2   | od_ngBHiudU3ubpu4k | rs1698231  | 3.48                                          | 3.33                                                   | -0.066               | 1.7                                       | 5.1                           | 0.4475 | 8.234  | 0.298                             | 7.416   | 8.03            | 8.232  | 8.41            | 9.185                   |         |
| DEF8    | uqWIViYouKDiIhQL14 | rs2270461  | 3.61                                          | 3.46                                                   | 0.068                | 0.74                                      | -42.81                        | 0.115  | 8.404  | 0.208                             | 7.87    | 8.266           | 8.386  | 8.525           | 8.962                   |         |
| DEF8    | uqWIViYouKDiIhQL14 | rs2270460  | 3.85                                          | 3.69                                                   | 0.075                | 1.43                                      | -42.73                        | 0.0969 | 8.404  | 0.208                             | 7.87    | 8.266           | 8.386  | 8.525           | 8.962                   |         |
| DEF8    | uqWIViYouKDiIhQL14 | rs3212346  | 3.61                                          | 3.46                                                   | 0.068                | 0.66                                      | -32.79                        | 0.115  | 8.404  | 0.208                             | 7.87    | 8.266           | 8.386  | 8.525           | 8.962                   |         |
| DENND2C | r6qwCr8e46NenNXcoo | rs7539721  | 4.54                                          | 4.34                                                   | -0.088               | 0.89                                      | -41.08                        | 0.13   | 7.404  | 0.13                              | 7.16    | 7.314           | 7.395  | 7.463           | 8.086                   |         |
| DENND2C | r6qwCr8e46NenNXcoo | rs6537841  | 4.54                                          | 4.34                                                   | -0.088               | 0.85                                      | -11.92                        | 0.13   | 7.404  | 0.13                              | 7.16    | 7.314           | 7.395  | 7.463           | 8.086                   |         |
| DENND2C | r6qwCr8e46NenNXcoo | rs761755   | 4.54                                          | 4.34                                                   | 0.088                | 0.89                                      | 9.7                           | 0.13   | 7.404  | 0.13                              | 7.16    | 7.314           | 7.395  | 7.463           | 8.086                   |         |
| DEPDC6  | Kn3clQEmE5wLVffSLQ | rs7815122  | 4.14                                          | 3.96                                                   | -0.082               | 0.62                                      | -16.94                        | 0.1575 | 7.265  | 0.079                             | 7.104   | 7.204           | 7.267  | 7.314           | 7.483                   |         |
| DEPDC6  | Kn3clQEmE5wLVffSLQ | rs7843326  | 4.68                                          | 4.48                                                   | -0.092               | 2.16                                      | -12.62                        | 0.3568 | 7.265  | 0.079                             | 7.104   | 7.204           | 7.267  | 7.314           | 7.483                   |         |
| DEPDC6  | Kn3clQEmE5wLVffSLQ | rs6987100  | 3.52                                          | 3.37                                                   | -0.067               | 0.37                                      | -10.74                        | 0.13   | 7.265  | 0.079                             | 7.104   | 7.204           | 7.267  | 7.314           | 7.483                   |         |
| DEPDC6  | Kn3clQEmE5wLVffSLQ | rs1467044  | 7.9                                           | 7.54                                                   | -0.158               | 2.41                                      | 1.08                          | 0.4525 | 7.265  | 0.079                             | 7.104   | 7.204           | 7.267  | 7.314           | 7.483                   |         |
| DEPDC6  | Kn3clQEmE5wLVffSLQ | rs11781657 | 7.85                                          | 7.50                                                   | 0.158                | 2.4                                       | 3.28                          | 0.455  | 7.265  | 0.079                             | 7.104   | 7.204           | 7.267  | 7.314           | 7.483                   |         |
| DEPDC6  | Kn3clQEmE5wLVffSLQ | rs6469858  | 4.2                                           | 4.02                                                   | 0.083                | 0.24                                      | 10.27                         | 0.12   | 7.265  | 0.079                             | 7.104   | 7.204           | 7.267  | 7.314           | 7.483                   |         |
| DEPDC6  | Kn3clQEmE5wLVffSLQ | rs12679478 | 3.8                                           | 3.64                                                   | -0.074               | 0.91                                      | 30.27                         | 0.2275 | 7.265  | 0.079                             | 7.104   | 7.204           | 7.267  | 7.314           | 7.483                   |         |
| DEPDC6  | Kn3clQEmE5wLVffSLQ | rs7388491  | 3.44                                          | 3.30                                                   | -0.066               | 0.46                                      | 39.91                         | 0.1975 | 7.265  | 0.079                             | 7.104   | 7.204           | 7.267  | 7.314           | 7.483                   |         |
| DEPDC6  | Kn3clQEmE5wLVffSLQ | rs869340   | 3.72                                          | 3.56                                                   | 0.073                | 1.08                                      | 46.65                         | 0.2312 | 7.265  | 0.079                             | 7.104   | 7.204           | 7.267  | 7.314           | 7.483                   |         |
| DEPDC6  | Kn3clQEmE5wLVffSLQ | rs9987332  | 7.59                                          | 7.25                                                   | 0.152                | 2.27                                      | 48                            | 0.415  | 7.265  | 0.079                             | 7.104   | 7.204           | 7.267  | 7.314           | 7.483                   |         |
| DEPDC6  | Kn3clQEmE5wLVffSLQ | rs7813263  | 3.65                                          | 3.50                                                   | -0.07                | 0.51                                      | 52.97                         | 0.2    | 7.265  | 0.079                             | 7.104   | 7.204           | 7.267  | 7.314           | 7.483                   |         |
| DEPDC6  | Kn3clQEmE5wLVffSLQ | rs7005380  | 4.9                                           | 4.69                                                   | 0.098                | 0.74                                      | 67.91                         | 0.335  | 7.265  | 0.079                             | 7.104   | 7.204           | 7.267  | 7.314           | 7.483                   |         |
| DEPDC6  | Kn3clQEmE5wLVffSLQ | rs11984766 | 3.61                                          | 3.45                                                   | 0.071                | 1.48                                      | -68.36                        | 0.475  | 7.265  | 0.079                             | 7.104   | 7.204           | 7.267  | 7.314           | 7.483                   |         |
| DEPDC6  | Kn3clQEmE5wLVffSLQ | rs7833689  | 3.39                                          | 3.25                                                   | -0.066               | 0.49                                      | -38.79                        | 0.4296 | 7.265  | 0.079                             | 7.104   | 7.204           | 7.267  | 7.314           | 7.483                   |         |
| DFFB    | TqTaSeBxNw_tjvHNN0 | rs4074709  | 3.85                                          | 3.69                                                   | -0.074               | 2.12                                      | -5.04                         | 0.1575 | 9.319  | 0.29                              | 8.442   | 9.125           | 9.321  | 9.514           | 9.99                    |         |
| DFFB    | TqTaSeBxNw_tjvHNN0 | rs4131373  | 4.31                                          | 4.12                                                   | 0.09                 | 2.42                                      | 5.39                          | 0.17   | 9.319  | 0.29                              | 8.442   | 9.125           | 9.321  | 9.514           | 9.99                    |         |
| DFFB    | TqTaSeBxNw_tjvHNN0 | rs12082157 | 4.25                                          | 4.06                                                   | 0.089                | 2.43                                      | 9.82                          | 0.1709 | 9.319  | 0.29                              | 8.442   | 9.125           | 9.321  | 9.514           | 9.99                    |         |
| DFNA5   | NERV5_oVyczk.zuF_U | rs1053962  | 5.16                                          | 4.93                                                   | -0.099               | 3                                         | -34.68                        | 0.3065 | 7.228  | 0.118                             | 7.105   | 7.149           | 7.194  | 7.272           | 8.034                   |         |
| DFNA5   | NERV5_oVyczk.zuF_U | rs2074142  | 5.14                                          | 4.92                                                   | 0.098                | 2.53                                      | 4.61                          | 0.2325 | 7.228  | 0.118                             | 7.105   | 7.149           | 7.194  | 7.272           | 8.034                   |         |
| DFNA5   | NERV5_oVyczk.zuF_U | rs2721808  | 7.53                                          | 7.19                                                   | -0.146               | 4.63                                      | 6.33                          | 0.44   | 7.228  | 0.118                             | 7.105   | 7.149           | 7.194  | 7.272           | 8.034                   |         |
| DFNA5   | NERV5_oVyczk.zuF_U | rs2721809  | 5.57                                          | 5.33                                                   | -0.106               | 3.91                                      | 9.94                          | 0.3875 | 7.228  | 0.118                             | 7.105   | 7.149           | 7.194  | 7.272           | 8.034                   |         |
| DFNA5   | NERV5_oVyczk.zuF_U | rs2237315  | 3.75                                          | 3.59                                                   | 0.07                 | 3.03                                      | 23.88                         | 0.29   | 7.228  | 0.118                             | 7.105   | 7.149           | 7.194  | 7.272           | 8.034                   |         |
| DFNA5   | NERV5_oVyczk.zuF_U | rs1001464  | 4.42                                          | 4.23                                                   | -0.084               | 0.98                                      | -28.27                        | 0.0875 | 7.228  | 0.118                             | 7.105   | 7.149           | 7.194  | 7.272           | 8.034                   |         |
| DFNA5   | NERV5_oVyczk.zuF_U | rs2237318  | 6.69                                          | 6.39                                                   | 0.13                 | 3.32                                      | -28.09                        | 0.285  | 7.228  | 0.118                             | 7.105   | 7.149           | 7.194  | 7.272           | 8.034                   |         |

| Symbol  | Lumi nuID           | SNP        | Population-based association p-value (-log10) | Population-based association p-value (-log10), GC adj. | % Variance Explained | Family-based association p-value (-log10) | Distance from transcript (kb) | MAF    | Mean  | Transcript abundance (log2 scale) |         |                 |        |                 | SNP mapping under probe |
|---------|---------------------|------------|-----------------------------------------------|--------------------------------------------------------|----------------------|-------------------------------------------|-------------------------------|--------|-------|-----------------------------------|---------|-----------------|--------|-----------------|-------------------------|
|         |                     |            |                                               |                                                        |                      |                                           |                               |        |       | Standard Deviation                | Minimum | 25th percentile | Median | 75th percentile |                         |
| DFNA5   | NERV5_oVyczk.zuF_U  | rs1476520  | 10.32                                         | 9.85                                                   | -0.2                 | 5.96                                      | -1.13                         | 0.4275 | 7.228 | 0.118                             | 7.105   | 7.149           | 7.194  | 7.272           | 8.034                   |
| DFNA5   | NERV5_oVyczk.zuF_U  | rs6976667  | 6.06                                          | 5.79                                                   | -0.116               | 2.78                                      | 7.69                          | 0.3593 | 7.228 | 0.118                             | 7.105   | 7.149           | 7.194  | 7.272           | 8.034                   |
| DFNA5   | NERV5_oVyczk.zuF_U  | rs1468185  | 3.97                                          | 3.80                                                   | 0.075                | 1.42                                      | 21.29                         | 0.2275 | 7.228 | 0.118                             | 7.105   | 7.149           | 7.194  | 7.272           | 8.034                   |
| DFNA5   | NERV5_oVyczk.zuF_U  | rs11762966 | 3.94                                          | 3.78                                                   | 0.074                | 0.66                                      | 27.41                         | 0.0625 | 7.228 | 0.118                             | 7.105   | 7.149           | 7.194  | 7.272           | 8.034                   |
| DFNA5   | NERV5_oVyczk.zuF_U  | rs17150155 | 4.69                                          | 4.49                                                   | -0.089               | 1.66                                      | 29.25                         | 0.2475 | 7.228 | 0.118                             | 7.105   | 7.149           | 7.194  | 7.272           | 8.034                   |
| DFNA5   | NERV5_oVyczk.zuF_U  | rs10227466 | 6.08                                          | 5.81                                                   | -0.122               | 4.43                                      | 46.26                         | 0.4875 | 7.228 | 0.118                             | 7.105   | 7.149           | 7.194  | 7.272           | 8.034                   |
| DGCR8   | KVcCvqjXZ7t_e9UpFE  | rs11703292 | 5.12                                          | 4.90                                                   | -0.098               | 2.17                                      | -41.88                        | 0.2387 | 8.75  | 0.381                             | 7.617   | 8.529           | 8.717  | 9.028           | 9.809                   |
| DGCR8   | KVcCvqjXZ7t_e9UpFE  | rs405342   | 7.35                                          | 7.02                                                   | -0.146               | 3.42                                      | -30.52                        | 0.2225 | 8.75  | 0.381                             | 7.617   | 8.529           | 8.717  | 9.028           | 9.809                   |
| DGCR8   | KVcCvqjXZ7t_e9UpFE  | rs17818431 | 5.09                                          | 4.87                                                   | 0.099                | 2.05                                      | -15.41                        | 0.15   | 8.75  | 0.381                             | 7.617   | 8.529           | 8.717  | 9.028           | 9.809                   |
| DGCR8   | KVcCvqjXZ7t_e9UpFE  | rs446059   | 5.15                                          | 4.93                                                   | -0.097               | 2.09                                      | -8.07                         | 0.0775 | 8.75  | 0.381                             | 7.617   | 8.529           | 8.717  | 9.028           | 9.809                   |
| DGCR8   | KVcCvqjXZ7t_e9UpFE  | rs9606248  | 5.01                                          | 4.79                                                   | -0.099               | 2.32                                      | -11.86                        | 0.16   | 8.75  | 0.381                             | 7.617   | 8.529           | 8.717  | 9.028           | 9.809                   |
| DGCR8   | KVcCvqjXZ7t_e9UpFE  | rs8139591  | 5.01                                          | 4.79                                                   | -0.099               | 2.32                                      | -6.08                         | 0.16   | 8.75  | 0.381                             | 7.617   | 8.529           | 8.717  | 9.028           | 9.809                   |
| DGKE    | 9x7QFJOvD7iTXeSTIU  | rs970718   | 4.18                                          | 4.00                                                   | -0.079               | 0.27                                      | -36.03                        | 0.1625 | 7.556 | 0.174                             | 7.122   | 7.452           | 7.551  | 7.651           | 8.696                   |
| DGKI    | QF5Ro2DrHxKxd3yod4  | rs270896   | 3.46                                          | 3.32                                                   | 0.065                | 1.36                                      | -165.14                       | 0.3525 | 7.108 | 0.006                             | 7.096   | 7.103           | 7.107  | 7.112           | 7.138                   |
| DGKI    | QF5Ro2DrHxKxd3yod4  | rs6976725  | 3.57                                          | 3.42                                                   | 0.067                | 1.49                                      | -150.69                       | 0.355  | 7.108 | 0.006                             | 7.096   | 7.103           | 7.107  | 7.112           | 7.138                   |
| DGKI    | QF5Ro2DrHxKxd3yod4  | rs3778799  | 3.48                                          | 3.34                                                   | -0.066               | 1.04                                      | -146.53                       | 0.4125 | 7.108 | 0.006                             | 7.096   | 7.103           | 7.107  | 7.112           | 7.138                   |
| DGKI    | QF5Ro2DrHxKxd3yod4  | rs2113428  | 3.48                                          | 3.34                                                   | -0.066               | 1.4                                       | -138.92                       | 0.4125 | 7.108 | 0.006                             | 7.096   | 7.103           | 7.107  | 7.112           | 7.138                   |
| DGKQ    | QZiV67oe63s4Nu7B7o  | rs873785   | 11.23                                         | 10.71                                                  | -0.221               | 5.09                                      | -27.53                        | 0.36   | 9.77  | 0.463                             | 8.779   | 9.38            | 9.755  | 10.071          | 11.114                  |
| DGKQ    | QZiV67oe63s4Nu7B7o  | rs11724804 | 19.67                                         | 18.75                                                  | -0.356               | 6.31                                      | -1.56                         | 0.4475 | 9.77  | 0.463                             | 8.779   | 9.38            | 9.755  | 10.071          | 11.114                  |
| DGKQ    | QZiV67oe63s4Nu7B7o  | rs3796622  | 6.27                                          | 5.99                                                   | -0.122               | 1.4                                       | 15.72                         | 0.3675 | 9.77  | 0.463                             | 8.779   | 9.38            | 9.755  | 10.071          | 11.114                  |
| DGKQ    | QZiV67oe63s4Nu7B7o  | rs3822030  | 10.59                                         | 10.11                                                  | 0.209                | 3.79                                      | 20                            | 0.4359 | 9.77  | 0.463                             | 8.779   | 9.38            | 9.755  | 10.071          | 11.114                  |
| DHCHR24 | xfozx4CoquiOrukuzo  | rs7551288  | 3.43                                          | 3.28                                                   | 0.064                | 2.25                                      | -14.23                        | 0.4175 | 7.42  | 0.131                             | 7.142   | 7.332           | 7.404  | 7.497           | 7.871                   |
| DHRS1   | uzgiCV3nu7W64veq5k  | rs4568     | 4.35                                          | 4.16                                                   | -0.088               | 1.93                                      | 0.2                           | 0.265  | 10.27 | 0.321                             | 9.462   | 10.051          | 10.264 | 10.493          | 11.049                  |
| DHRS12  | rTqv_oNKd0RHnpOl.c  | rs9526795  | 10.22                                         | 9.75                                                   | -0.202               | 1.67                                      | -3.74                         | 0.25   | 7.411 | 0.127                             | 7.15    | 7.318           | 7.397  | 7.485           | 7.93                    |
| DHRS12  | rTqv_oNKd0RHnpOl.c  | rs2296027  | 3.49                                          | 3.34                                                   | -0.068               | 2.09                                      | 0.92                          | 0.0775 | 7.411 | 0.127                             | 7.15    | 7.318           | 7.397  | 7.485           | 7.93                    |
| DHRS12  | rTqv_oNKd0RHnpOl.c  | rs1543525  | 4.7                                           | 4.49                                                   | -0.091               | 1.07                                      | 10.53                         | 0.42   | 7.411 | 0.127                             | 7.15    | 7.318           | 7.397  | 7.485           | 7.93                    |
| DHRS12  | rTqv_oNKd0RHnpOl.c  | rs9535764  | 4.8                                           | 4.59                                                   | 0.095                | 0.22                                      | 14.88                         | 0.16   | 7.411 | 0.127                             | 7.15    | 7.318           | 7.397  | 7.485           | 7.93                    |
| DHRS12  | rTqv_oNKd0RHnpOl.c  | rs7336182  | 4.16                                          | 3.98                                                   | 0.081                | 3.54                                      | 34.92                         | 0.07   | 7.411 | 0.127                             | 7.15    | 7.318           | 7.397  | 7.485           | 7.93                    |
| DHX32   | HQEOrkkq1QKyejp4Hk  | rs10510149 | 17.6                                          | 16.77                                                  | -0.34                | 2.57                                      | -29.1                         | 0.445  | 8.877 | 0.316                             | 7.825   | 8.685           | 8.908  | 9.097           | 9.806                   |
| DHX32   | HQEOrkkq1QKyejp4Hk  | rs10794024 | 17.6                                          | 16.77                                                  | -0.34                | 2.57                                      | -28.3                         | 0.445  | 8.877 | 0.316                             | 7.825   | 8.685           | 8.908  | 9.097           | 9.806                   |
| DHX32   | HQEOrkkq1QKyejp4Hk  | rs12356233 | 21.4                                          | 20.39                                                  | -0.4                 | 3.83                                      | 10.02                         | 0.435  | 8.877 | 0.316                             | 7.825   | 8.685           | 8.908  | 9.097           | 9.806                   |
| DHX32   | HQEOrkkq1QKyejp4Hk  | rs10794030 | 18.94                                         | 18.05                                                  | -0.364               | 2.42                                      | -7.51                         | 0.4625 | 8.877 | 0.316                             | 7.825   | 8.685           | 8.908  | 9.097           | 9.806                   |
| DIP13B  | 0e6Eq5J3FL17994IU   | rs1196814  | 5.12                                          | 4.89                                                   | -0.101               | 1.59                                      | -38.27                        | 0.42   | 9.374 | 0.33                              | 8.596   | 9.148           | 9.385  | 9.584           | 10.244                  |
| DIP13B  | 0e6Eq5J3FL17994IU   | rs1196804  | 5.13                                          | 4.91                                                   | 0.103                | 1.34                                      | -27.69                        | 0.4213 | 9.374 | 0.33                              | 8.596   | 9.148           | 9.385  | 9.584           | 10.244                  |
| DIP13B  | 0e6Eq5J3FL17994IU   | rs1663564  | 3.67                                          | 3.51                                                   | 0.071                | 0.93                                      | -20.9                         | 0.085  | 9.374 | 0.33                              | 8.596   | 9.148           | 9.385  | 9.584           | 10.244                  |
| DIP13B  | 0e6Eq5J3FL17994IU   | rs1663563  | 5.82                                          | 5.57                                                   | -0.117               | 1.81                                      | -17.87                        | 0.345  | 9.374 | 0.33                              | 8.596   | 9.148           | 9.385  | 9.584           | 10.244                  |
| DIP13B  | 0e6Eq5J3FL17994IU   | rs1196872  | 3.61                                          | 3.46                                                   | 0.07                 | 1.48                                      | -5.04                         | 0.19   | 9.374 | 0.33                              | 8.596   | 9.148           | 9.385  | 9.584           | 10.244                  |
| DIP13B  | 0e6Eq5J3FL17994IU   | rs935251   | 6.08                                          | 5.81                                                   | 0.122                | 1.97                                      | 13.84                         | 0.345  | 9.374 | 0.33                              | 8.596   | 9.148           | 9.385  | 9.584           | 10.244                  |
| DIP13B  | 0e6Eq5J3FL17994IU   | rs1196852  | 3.47                                          | 3.33                                                   | -0.066               | 0.71                                      | 15.17                         | 0.265  | 9.374 | 0.33                              | 8.596   | 9.148           | 9.385  | 9.584           | 10.244                  |
| DIP13B  | 0e6Eq5J3FL17994IU   | rs1196751  | 3.54                                          | 3.39                                                   | 0.067                | 2.11                                      | -28.47                        | 0.4675 | 9.374 | 0.33                              | 8.596   | 9.148           | 9.385  | 9.584           | 10.244                  |
| DIP13B  | 0e6Eq5J3FL17994IU   | rs1196753  | 3.41                                          | 3.27                                                   | 0.066                | 1.52                                      | -27.38                        | 0.195  | 9.374 | 0.33                              | 8.596   | 9.148           | 9.385  | 9.584           | 10.244                  |
| DIP13B  | 0e6Eq5J3FL17994IU   | rs1209637  | 4.16                                          | 3.99                                                   | 0.082                | 1.45                                      | 3.71                          | 0.2    | 9.374 | 0.33                              | 8.596   | 9.148           | 9.385  | 9.584           | 10.244                  |
| DIP13B  | 0e6Eq5J3FL17994IU   | rs1196797  | 3.88                                          | 3.71                                                   | 0.077                | 1.32                                      | 6.81                          | 0.1975 | 9.374 | 0.33                              | 8.596   | 9.148           | 9.385  | 9.584           | 10.244                  |
| DIP13B  | 0e6Eq5J3FL17994IU   | rs2374448  | 5.69                                          | 5.44                                                   | -0.112               | 2.05                                      | 16.1                          | 0.42   | 9.374 | 0.33                              | 8.596   | 9.148           | 9.385  | 9.584           | 10.244                  |
| DIP13B  | 0e6Eq5J3FL17994IU   | rs10861366 | 4.03                                          | 3.85                                                   | -0.08                | 1.42                                      | 30.78                         | 0.23   | 9.374 | 0.33                              | 8.596   | 9.148           | 9.385  | 9.584           | 10.244                  |
| DIP13B  | 0e6Eq5J3FL17994IU   | rs10778374 | 3.45                                          | 3.30                                                   | 0.066                | 0.86                                      | 30.9                          | 0.4225 | 9.374 | 0.33                              | 8.596   | 9.148           | 9.385  | 9.584           | 10.244                  |
| DIP13B  | 0e6Eq5J3FL17994IU   | rs12822081 | 4.14                                          | 3.97                                                   | 0.084                | 1.56                                      | 45.6                          | 0.215  | 9.374 | 0.33                              | 8.596   | 9.148           | 9.385  | 9.584           | 10.244                  |
| DIP2A   | clqLI9fT_SdqC3_5LI  | rs2073379  | 5.23                                          | 5.00                                                   | 0.105                | 1.28                                      | -15.87                        | 0.1818 | 7.928 | 0.223                             | 7.38    | 7.786           | 7.915  | 8.088           | 8.467                   |
| DIP2A   | fu.ikvWtFEookVN.hl  | rs2073379  | 4.08                                          | 3.90                                                   | 0.078                | 0.8                                       | -15.87                        | 0.1818 | 7.9   | 0.321                             | 7.294   | 7.647           | 7.852  | 8.108           | 9.088                   |
| DIP2A   | 9gAocJcEhU11edEipHs | rs2073379  | 3.37                                          | 3.23                                                   | 0.064                | 0.22                                      | -15.87                        | 0.1818 | 7.522 | 0.242                             | 7.113   | 7.352           | 7.503  | 7.652           | 8.623                   |
| DIP2A   | clqLI9fT_SdqC3_5LI  | rs11702704 | 3.67                                          | 3.53                                                   | -0.071               | 1.28                                      | -10.57                        | 0.265  | 7.928 | 0.223                             | 7.38    | 7.786           | 7.915  | 8.088           | 8.467                   |
| DIP2A   | fu.ikvWtFEookVN.hl  | rs11702704 | 3.37                                          | 3.23                                                   | -0.063               | 1.57                                      | -10.57                        | 0.265  | 7.9   | 0.321                             | 7.294   | 7.647           | 7.852  | 8.108           | 9.088                   |
| DIP2A   | fu.ikvWtFEookVN.hl  | rs718496   | 5.21                                          | 4.98                                                   | 0.103                | 1.63                                      | 25.7                          | 0.2176 | 7.9   | 0.321                             | 7.294   | 7.647           | 7.852  | 8.108           | 9.088                   |
| DIP2A   | clqLI9fT_SdqC3_5LI  | rs718496   | 4.61                                          | 4.41                                                   | 0.094                | 1.21                                      | 25.7                          | 0.2176 | 7.928 | 0.223                             | 7.38    | 7.786           | 7.915  | 8.088           | 8.467                   |
| DIP2A   | 9gAocJcEhU11edEipHs | rs718496   | 4.34                                          | 4.15                                                   | 0.086                | 1.29                                      | 25.7                          | 0.2176 | 7.522 | 0.242                             | 7.113   | 7.352           | 7.503  | 7.652           | 8.623                   |
| DIP2A   | clqLI9fT_SdqC3_5LI  | rs1029231  | 4.79                                          | 4.58                                                   | 0.095                | 1.54                                      | -35.47                        | 0.23   | 7.928 | 0.223                             | 7.38    | 7.786           | 7.915  | 8.088           | 8.467                   |
| DIP2A   | fu.ikvWtFEookVN.hl  | rs1029231  | 4.76                                          | 4.55                                                   | 0.092                | 1.35                                      | -38.37                        | 0.23   | 7.9   | 0.321                             | 7.294   | 7.647           | 7.852  | 8.108           | 9.088                   |
| DIP2A   | 9gAocJcEhU11edEipHs | rs1029231  | 3.77                                          | 3.61                                                   | 0.072                | 1.02                                      | 52.76                         | 0.23   | 7.522 | 0.242                             | 7.113   | 7.352           | 7.503  | 7.652           | 8.623                   |
| DIP2A   | clqLI9fT_SdqC3_5LI  | rs2070433  | 4.65                                          | 4.44                                                   | -0.092               | 1.21                                      | -5.73                         | 0.2175 | 7.928 | 0.223                             | 7.38    | 7.786           | 7.915  | 8.088           | 8.467                   |
| DIP2A   | fu.ikvWtFEookVN.hl  | rs2070433  | 4.46                                          | 4.27                                                   | -0.086               | 1                                         | -8.64                         | 0.2175 | 7.9   | 0.321                             | 7.294   | 7.647           | 7.852  | 8.108           | 9.088                   |
| DIP2A   | 9gAocJcEhU11edEipHs | rs2070433  | 3.68                                          | 3.52                                                   | -0.07                | 0.73                                      | -27.21                        | 0.2175 | 7.522 | 0.242                             | 7.113   | 7.352           | 7.503  | 7.652           | 8.623                   |
| DIP2A   | clqLI9fT_SdqC3_5LI  | rs2070435  | 5.82                                          | 5.57                                                   | -0.116               | 1.93                                      | -5.41                         | 0.315  | 7.928 | 0.223                             | 7.38    | 7.786           | 7.915  | 8.088           | 8.467                   |

| Symbol    | Lumi nuID          | SNP        | Population-based | Population-based          | % Variance | Family-based     | Distance from | MAF    | Mean      | Transcript abundance (log2 scale) |          |         |        |        | SNP mapping under probe |      |
|-----------|--------------------|------------|------------------|---------------------------|------------|------------------|---------------|--------|-----------|-----------------------------------|----------|---------|--------|--------|-------------------------|------|
|           |                    |            | association      | association               |            | association      |               |        |           | transcript (kb)                   | Standard | Minimum | 25th   | Median |                         | 75th |
|           |                    |            | p-value (-log10) | p-value (-log10), GC adj. | Explained  | p-value (-log10) |               |        | Deviation |                                   |          |         |        |        |                         |      |
| DIP2A     | fu.ikvWtFEookVN.hl | rs2070435  | 4.91             | 4.70                      | -0.094     | 1.25             | -8.31         | 0.315  | 7.9       | 0.321                             | 7.294    | 7.647   | 7.852  | 8.108  | 9.088                   |      |
| DIP2A     | 9gAoJCEhU11edEipHs | rs2070435  | 4.91             | 4.69                      | -0.095     | 1.64             | -26.89        | 0.315  | 7.522     | 0.242                             | 7.113    | 7.352   | 7.503  | 7.652  | 8.623                   |      |
| DIP2A     | clqLI9fT_SdqC3_5LI | rs2839327  | 3.67             | 3.51                      | 0.07       | 1.02             | 15.53         | 0.1925 | 7.928     | 0.223                             | 7.38     | 7.786   | 7.915  | 8.088  | 8.467                   |      |
| DIP2A     | fu.ikvWtFEookVN.hl | rs2248636  | 4.33             | 4.15                      | 0.081      | 2.58             | 15.63         | 0.0775 | 7.9       | 0.321                             | 7.294    | 7.647   | 7.852  | 8.108  | 9.088                   |      |
| DIP2A     | fu.ikvWtFEookVN.hl | rs2277827  | 3.6              | 3.45                      | -0.066     | 0.87             | 15.98         | 0.4475 | 7.9       | 0.321                             | 7.294    | 7.647   | 7.852  | 8.108  | 9.088                   |      |
| DIP2A     | fu.ikvWtFEookVN.hl | rs2839349  | 3.79             | 3.63                      | -0.069     | 0.8              | 47.17         | 0.4475 | 7.9       | 0.321                             | 7.294    | 7.647   | 7.852  | 8.108  | 9.088                   |      |
| P434B0335 | E6p0qXfxTuS4U.dlko | rs2270604  | 3.48             | 3.33                      | -0.066     | 4.1              | 11.64         | 0.395  | 10.155    | 0.624                             | 8.917    | 9.687   | 10.071 | 10.524 | 12.303                  |      |
| P434B0335 | E6p0qXfxTuS4U.dlko | rs954050   | 3.91             | 3.74                      | -0.077     | 4.2              | -1.24         | 0.402  | 10.155    | 0.624                             | 8.917    | 9.687   | 10.071 | 10.524 | 12.303                  |      |
| ZP564J102 | ubfYglEIFega_0KVJE | rs2036912  | 6.33             | 6.05                      | -0.124     | 2.46             | 5.74          | 0.4146 | 7.156     | 0.075                             | 7.099    | 7.114   | 7.128  | 7.167  | 7.639                   |      |
| ZP564J102 | ubfYglEIFega_0KVJE | rs6816903  | 6.37             | 6.09                      | 0.125      | 2.56             | 7.08          | 0.4196 | 7.156     | 0.075                             | 7.099    | 7.114   | 7.128  | 7.167  | 7.639                   |      |
| ZP564J102 | ubfYglEIFega_0KVJE | rs10027488 | 6.19             | 5.92                      | 0.12       | 2.4              | 14.55         | 0.415  | 7.156     | 0.075                             | 7.099    | 7.114   | 7.128  | 7.167  | 7.639                   |      |
| DKK3      | HmHmBHgdxlHUQOO.Oo | rs11022098 | 4.69             | 4.49                      | 0.091      | 1.53             | 8.46          | 0.3325 | 7.213     | 0.088                             | 7.106    | 7.158   | 7.194  | 7.241  | 7.706                   |      |
| DKK3      | HmHmBHgdxlHUQOO.Oo | rs3812743  | 4.17             | 3.99                      | -0.079     | 1.46             | 10.82         | 0.4824 | 7.213     | 0.088                             | 7.106    | 7.158   | 7.194  | 7.241  | 7.706                   |      |
| DLK2      | 3ei61vdFFfsfqxERlo | rs2125739  | 5.82             | 5.57                      | 0.108      | 1.7              | -5.22         | 0.2186 | 7.357     | 0.139                             | 7.118    | 7.26    | 7.334  | 7.431  | 7.868                   |      |
| DLK2      | 3ei61vdFFfsfqxERlo | rs1214748  | 5.79             | 5.54                      | 0.106      | 1.67             | 0.6           | 0.275  | 7.357     | 0.139                             | 7.118    | 7.26    | 7.334  | 7.431  | 7.868                   |      |
| DLK2      | 3ei61vdFFfsfqxERlo | rs1674850  | 6.19             | 5.92                      | 0.114      | 2.22             | 4.56          | 0.27   | 7.357     | 0.139                             | 7.118    | 7.26    | 7.334  | 7.431  | 7.868                   |      |
| DLL1      | ZkeX1uG2W_RzoS_d8l | rs4710781  | 3.65             | 3.50                      | -0.069     | 0.81             | -9.26         | 0.2825 | 7.607     | 0.218                             | 7.136    | 7.454   | 7.595  | 7.749  | 8.307                   |      |
| DLL1      | ZkeX1uG2W_RzoS_d8l | rs9348264  | 3.66             | 3.51                      | -0.066     | 0.55             | 18.14         | 0.1325 | 7.607     | 0.218                             | 7.136    | 7.454   | 7.595  | 7.749  | 8.307                   |      |
| DLL1      | ZkeX1uG2W_RzoS_d8l | rs9348266  | 3.66             | 3.51                      | 0.066      | 0.55             | 28.54         | 0.1325 | 7.607     | 0.218                             | 7.136    | 7.454   | 7.595  | 7.749  | 8.307                   |      |
| DLL3      | r1kXotIm6P.s.na65U | rs11881477 | 4.23             | 4.05                      | -0.078     | 1.85             | -40.81        | 0.375  | 7.176     | 0.045                             | 7.113    | 7.144   | 7.168  | 7.193  | 7.357                   |      |
| DMN       | 9dVKMuSKETSqSA4TY  | rs260105   | 4.9              | 4.69                      | -0.096     | 2.34             | -11.84        | 0.23   | 7.182     | 0.044                             | 7.11     | 7.154   | 7.175  | 7.202  | 7.43                    | Yes  |
| DMN       | cS0d5EQIAOH26_jqlo | rs8038475  | 4.88             | 4.67                      | 0.098      | 4                | -7.62         | 0.2146 | 7.795     | 0.316                             | 7.114    | 7.581   | 7.798  | 8.023  | 8.611                   |      |
| DMN       | cS0d5EQIAOH26_jqlo | rs7496161  | 6.88             | 6.57                      | 0.135      | 4.01             | -3.3          | 0.1175 | 7.795     | 0.316                             | 7.114    | 7.581   | 7.798  | 8.023  | 8.611                   |      |
| DMN       | cS0d5EQIAOH26_jqlo | rs11636944 | 26.23            | 24.99                     | 0.454      | 7.31             | 2.32          | 0.365  | 7.795     | 0.316                             | 7.114    | 7.581   | 7.798  | 8.023  | 8.611                   |      |
| DMN       | cS0d5EQIAOH26_jqlo | rs1965866  | 18.02            | 17.18                     | 0.347      | 6                | 10.76         | 0.3675 | 7.795     | 0.316                             | 7.114    | 7.581   | 7.798  | 8.023  | 8.611                   |      |
| DMN       | cS0d5EQIAOH26_jqlo | rs7162579  | 18.11            | 17.27                     | 0.35       | 5.03             | -12.56        | 0.365  | 7.795     | 0.316                             | 7.114    | 7.581   | 7.798  | 8.023  | 8.611                   |      |
| DMN       | cS0d5EQIAOH26_jqlo | rs4965446  | 7.31             | 6.98                      | -0.143     | 4.2              | -8.1          | 0.11   | 7.795     | 0.316                             | 7.114    | 7.581   | 7.798  | 8.023  | 8.611                   |      |
| DMN       | cS0d5EQIAOH26_jqlo | rs1670227  | 13.89            | 13.25                     | 0.269      | 2.57             | -5.27         | 0.24   | 7.795     | 0.316                             | 7.114    | 7.581   | 7.798  | 8.023  | 8.611                   |      |
| DMN       | cS0d5EQIAOH26_jqlo | rs2292288  | 4.88             | 4.67                      | 0.094      | 0.66             | -3.07         | 0.4925 | 7.795     | 0.316                             | 7.114    | 7.581   | 7.798  | 8.023  | 8.611                   |      |
| DMN       | cS0d5EQIAOH26_jqlo | rs181987   | 7.2              | 6.88                      | 0.142      | 2.93             | 3.87          | 0.1332 | 7.795     | 0.316                             | 7.114    | 7.581   | 7.798  | 8.023  | 8.611                   |      |
| DMN       | cS0d5EQIAOH26_jqlo | rs260116   | 7.72             | 7.37                      | 0.152      | 3.4              | 7.06          | 0.1375 | 7.795     | 0.316                             | 7.114    | 7.581   | 7.798  | 8.023  | 8.611                   |      |
| DMN       | cS0d5EQIAOH26_jqlo | rs260115   | 13.23            | 12.62                     | 0.256      | 2.64             | 8             | 0.2325 | 7.795     | 0.316                             | 7.114    | 7.581   | 7.798  | 8.023  | 8.611                   |      |
| DMN       | cS0d5EQIAOH26_jqlo | rs260113   | 25.38            | 24.18                     | 0.449      | 8.35             | 9.36          | 0.3575 | 7.795     | 0.316                             | 7.114    | 7.581   | 7.798  | 8.023  | 8.611                   |      |
| DMN       | cS0d5EQIAOH26_jqlo | rs8039637  | 8.67             | 8.27                      | -0.169     | 1.34             | 11.16         | 0.16   | 7.795     | 0.316                             | 7.114    | 7.581   | 7.798  | 8.023  | 8.611                   |      |
| DMN       | cS0d5EQIAOH26_jqlo | rs2290352  | 7.61             | 7.27                      | -0.151     | 4.87             | 13.02         | 0.1075 | 7.795     | 0.316                             | 7.114    | 7.581   | 7.798  | 8.023  | 8.611                   |      |
| DMN       | cS0d5EQIAOH26_jqlo | rs1703770  | 11.82            | 11.27                     | 0.233      | 2.32             | 18.58         | 0.245  | 7.795     | 0.316                             | 7.114    | 7.581   | 7.798  | 8.023  | 8.611                   |      |
| DMN       | cS0d5EQIAOH26_jqlo | rs12903602 | 5.08             | 4.86                      | -0.1       | 0.74             | 22.76         | 0.17   | 7.795     | 0.316                             | 7.114    | 7.581   | 7.798  | 8.023  | 8.611                   |      |
| DMN       | cS0d5EQIAOH26_jqlo | rs8032154  | 9.25             | 8.83                      | 0.187      | 2.67             | 44.87         | 0.4343 | 7.795     | 0.316                             | 7.114    | 7.581   | 7.798  | 8.023  | 8.611                   |      |
| DNAH17    | IBQkTaBSKuivrugiou | rs595711   | 3.55             | 3.40                      | -0.065     | 1.85             | 28.44         | 0.265  | 7.38      | 0.214                             | 7.129    | 7.273   | 7.347  | 7.401  | 8.826                   |      |
| DNAH17    | IBQkTaBSKuivrugiou | rs671899   | 3.98             | 3.81                      | -0.077     | 1.19             | 34.91         | 0.3832 | 7.38      | 0.214                             | 7.129    | 7.273   | 7.347  | 7.401  | 8.826                   |      |
| DNAH17    | IBQkTaBSKuivrugiou | rs6501225  | 10.29            | 9.82                      | -0.205     | 2.86             | 39.75         | 0.1425 | 7.38      | 0.214                             | 7.129    | 7.273   | 7.347  | 7.401  | 8.826                   |      |
| DNAH17    | IBQkTaBSKuivrugiou | rs8081752  | 10.63            | 10.14                     | -0.21      | 3.32             | 45.69         | 0.135  | 7.38      | 0.214                             | 7.129    | 7.273   | 7.347  | 7.401  | 8.826                   |      |
| DNAH8     | NE6OISXqEhoOoJ06DU | rs13219077 | 3.64             | 3.49                      | -0.072     | 1.08             | 48.27         | 0.2425 | 7.148     | 0.041                             | 7.099    | 7.119   | 7.135  | 7.16   | 7.337                   | Yes  |
| DNAH8     | NE6OISXqEhoOoJ06DU | rs874808   | 5.76             | 5.51                      | 0.118      | 1.71             | 82.39         | 0.3925 | 7.148     | 0.041                             | 7.099    | 7.119   | 7.135  | 7.16   | 7.337                   | Yes  |
| DNAH8     | NE6OISXqEhoOoJ06DU | rs1738225  | 4.19             | 4.01                      | 0.081      | 1.44             | 88.24         | 0.255  | 7.148     | 0.041                             | 7.099    | 7.119   | 7.135  | 7.16   | 7.337                   | Yes  |
| DNAH8     | NE6OISXqEhoOoJ06DU | rs1678687  | 4.23             | 4.05                      | -0.083     | 1.5              | 89.57         | 0.2538 | 7.148     | 0.041                             | 7.099    | 7.119   | 7.135  | 7.16   | 7.337                   | Yes  |
| DNAH8     | NE6OISXqEhoOoJ06DU | rs1738220  | 5.99             | 5.72                      | -0.121     | 2.11             | 91.5          | 0.385  | 7.148     | 0.041                             | 7.099    | 7.119   | 7.135  | 7.16   | 7.337                   | Yes  |
| DNAH8     | NE6OISXqEhoOoJ06DU | rs1738211  | 7.33             | 7.00                      | -0.151     | 2.72             | 99.25         | 0.4025 | 7.148     | 0.041                             | 7.099    | 7.119   | 7.135  | 7.16   | 7.337                   | Yes  |
| DNAH8     | NE6OISXqEhoOoJ06DU | rs9394546  | 3.48             | 3.45                      | -0.071     | 1.51             | 148.42        | 0.245  | 7.148     | 0.041                             | 7.099    | 7.119   | 7.135  | 7.16   | 7.337                   | Yes  |
| DNAH8     | NE6OISXqEhoOoJ06DU | rs9380804  | 3.6              | 3.48                      | -0.07      | 1.52             | -145.58       | 0.2839 | 7.148     | 0.041                             | 7.099    | 7.119   | 7.135  | 7.16   | 7.337                   | Yes  |
| DNAH8     | NE6OISXqEhoOoJ06DU | rs9394550  | 6.47             | 6.14                      | 0.132      | 2.83             | -145.34       | 0.4025 | 7.148     | 0.041                             | 7.099    | 7.119   | 7.135  | 7.16   | 7.337                   | Yes  |
| DNAH8     | NE6OISXqEhoOoJ06DU | rs9357290  | 6.72             | 6.42                      | -0.142     | 3.55             | -144.93       | 0.4046 | 7.148     | 0.041                             | 7.099    | 7.119   | 7.135  | 7.16   | 7.337                   | Yes  |
| DNAJC15   | c94iSk_ze37_u8T6RU | rs1886152  | 3.73             | 3.57                      | -0.073     | 3.08             | -47.34        | 0.3914 | 9.137     | 0.332                             | 7.279    | 8.939   | 9.165  | 9.369  | 9.865                   | Yes  |
| DNAJC15   | c94iSk_ze37_u8T6RU | rs11147895 | 6.95             | 6.64                      | 0.142      | 4.67             | -38.56        | 0.4    | 9.137     | 0.332                             | 7.279    | 8.939   | 9.165  | 9.369  | 9.865                   | Yes  |
| DNAJC15   | c94iSk_ze37_u8T6RU | rs17623408 | 6.89             | 6.58                      | 0.145      | 3.74             | -28.28        | 0.3625 | 9.137     | 0.332                             | 7.279    | 8.939   | 9.165  | 9.369  | 9.865                   | Yes  |
| DNAJC15   | c94iSk_ze37_u8T6RU | rs17623620 | 6.56             | 6.27                      | -0.137     | 3.54             | -12.07        | 0.3475 | 9.137     | 0.332                             | 7.279    | 8.939   | 9.165  | 9.369  | 9.865                   | Yes  |
| DNAJC15   | c94iSk_ze37_u8T6RU | rs9315981  | 10.95            | 10.45                     | -0.224     | 5.49             | -10.28        | 0.3525 | 9.137     | 0.332                             | 7.279    | 8.939   | 9.165  | 9.369  | 9.865                   | Yes  |
| DNAJC15   | c94iSk_ze37_u8T6RU | rs11617079 | 23.03            | 21.94                     | -0.418     | 8.91             | 0.5           | 0.2    | 9.137     | 0.332                             | 7.279    | 8.939   | 9.165  | 9.369  | 9.865                   | Yes  |
| DNAJC15   | c94iSk_ze37_u8T6RU | rs2281782  | 23.03            | 21.94                     | -0.418     | 9.01             | 0.83          | 0.2    | 9.137     | 0.332                             | 7.279    | 8.939   | 9.165  | 9.369  | 9.865                   | Yes  |
| DNAJC15   | c94iSk_ze37_u8T6RU | rs7322198  | 9.91             | 9.45                      | -0.211     | 5.96             | 2.05          | 0.4675 | 9.137     | 0.332                             | 7.279    | 8.939   | 9.165  | 9.369  | 9.865                   | Yes  |
| DNAJC15   | c94iSk_ze37_u8T6RU | rs1359182  | 14.85            | 14.16                     | 0.293      | 8.24             | 5.73          | 0.28   | 9.137     | 0.332                             | 7.279    | 8.939   | 9.165  | 9.369  | 9.865                   | Yes  |
| DNAJC15   | c94iSk_ze37_u8T6RU | rs12322976 | 5.91             | 5.65                      | -0.126     | 3.6              | 6.32          | 0.2168 | 9.137     | 0.332                             | 7.279    | 8.939   | 9.165  | 9.369  | 9.865                   | Yes  |

| Symbol  | Lumi nuID          | SNP        | Population-based association |                           |                      | Family-based association |                               |        | Transcript abundance (log2 scale) |                    |         |                 |        |                 | SNP mapping under probe |         |
|---------|--------------------|------------|------------------------------|---------------------------|----------------------|--------------------------|-------------------------------|--------|-----------------------------------|--------------------|---------|-----------------|--------|-----------------|-------------------------|---------|
|         |                    |            | p-value (-log10)             | p-value (-log10), GC adj. | % Variance Explained | p-value (-log10)         | Distance from transcript (kb) | MAF    | Mean                              | Standard Deviation | Minimum | 25th percentile | Median | 75th percentile |                         | Maximum |
| DNAJC15 | c94iSk_ze37_u8T6RU | rs1323862  | 9.91                         | 9.45                      | -0.211               | 5.96                     | 6.51                          | 0.4675 | 9.137                             | 0.332              | 7.279   | 8.939           | 9.165  | 9.369           | 9.865                   | Yes     |
| DNAJC15 | c94iSk_ze37_u8T6RU | rs9533366  | 14.96                        | 14.26                     | -0.297               | 8.75                     | 32.23                         | 0.2725 | 9.137                             | 0.332              | 7.279   | 8.939           | 9.165  | 9.369           | 9.865                   | Yes     |
| DNAJC15 | c94iSk_ze37_u8T6RU | rs1028735  | 14.85                        | 14.16                     | 0.295                | 8.78                     | 41.41                         | 0.2714 | 9.137                             | 0.332              | 7.279   | 8.939           | 9.165  | 9.369           | 9.865                   | Yes     |
| DNAJC15 | c94iSk_ze37_u8T6RU | rs9315986  | 14.48                        | 13.81                     | 0.289                | 8.35                     | -26.86                        | 0.28   | 9.137                             | 0.332              | 7.279   | 8.939           | 9.165  | 9.369           | 9.865                   | Yes     |
| DNAJC15 | c94iSk_ze37_u8T6RU | rs2057529  | 9.85                         | 9.40                      | -0.213               | 5.76                     | -25.18                        | 0.4875 | 9.137                             | 0.332              | 7.279   | 8.939           | 9.165  | 9.369           | 9.865                   | Yes     |
| DNAJC15 | c94iSk_ze37_u8T6RU | rs9533385  | 14.91                        | 14.22                     | -0.297               | 8.58                     | -13.57                        | 0.2714 | 9.137                             | 0.332              | 7.279   | 8.939           | 9.165  | 9.369           | 9.865                   | Yes     |
| DNAJC15 | c94iSk_ze37_u8T6RU | rs7325480  | 7.61                         | 7.27                      | -0.166               | 4.97                     | 7.99                          | 0.495  | 9.137                             | 0.332              | 7.279   | 8.939           | 9.165  | 9.369           | 9.865                   | Yes     |
| DNM1L   | luL6QvXRMi0_z1F7X0 | rs10844270 | 4.06                         | 3.89                      | 0.076                | 2.73                     | -28.69                        | 0.4695 | 8.821                             | 0.359              | 7.335   | 8.612           | 8.868  | 9.065           | 9.63                    |         |
| DNM1L   | BeKE6RJKoCCSeM5wKQ | rs11052135 | 3.73                         | 3.57                      | -0.072               | 0.82                     | -21.5                         | 0.305  | 7.957                             | 0.362              | 7.11    | 7.692           | 7.912  | 8.242           | 8.901                   |         |
| DNM1L   | BeKE6RJKoCCSeM5wKQ | rs11052152 | 4.7                          | 4.50                      | 0.092                | 0.39                     | -9.62                         | 0.2814 | 7.957                             | 0.362              | 7.11    | 7.692           | 7.912  | 8.242           | 8.901                   |         |
| DNTT    | Z7R66dPSoJ00CVH_9k | rs7073871  | 4.76                         | 4.55                      | -0.093               | 1.93                     | -3.17                         | 0.1231 | 7.489                             | 0.252              | 7.132   | 7.289           | 7.44   | 7.639           | 8.339                   |         |
| DNTT    | Z7R66dPSoJ00CVH_9k | rs12774154 | 4.69                         | 4.49                      | 0.094                | 2.26                     | 1.11                          | 0.1224 | 7.489                             | 0.252              | 7.132   | 7.289           | 7.44   | 7.639           | 8.339                   |         |
| DNTT    | Z7R66dPSoJ00CVH_9k | rs12779564 | 4.66                         | 4.45                      | -0.091               | 1.67                     | 1.54                          | 0.12   | 7.489                             | 0.252              | 7.132   | 7.289           | 7.44   | 7.639           | 8.339                   |         |
| DNTT    | Z7R66dPSoJ00CVH_9k | rs11188704 | 4.75                         | 4.54                      | 0.092                | 1.93                     | 8.76                          | 0.1225 | 7.489                             | 0.252              | 7.132   | 7.289           | 7.44   | 7.639           | 8.339                   |         |
| DNTT    | Z7R66dPSoJ00CVH_9k | rs3818313  | 4.22                         | 4.03                      | 0.082                | 1.7                      | -6.39                         | 0.1125 | 7.489                             | 0.252              | 7.132   | 7.289           | 7.44   | 7.639           | 8.339                   |         |
| DNTT    | Z7R66dPSoJ00CVH_9k | rs1923703  | 4.22                         | 4.03                      | -0.082               | 1.7                      | 4.12                          | 0.1125 | 7.489                             | 0.252              | 7.132   | 7.289           | 7.44   | 7.639           | 8.339                   |         |
| DOCK7   | upLP17ReUSi9fS2DIU | rs1167998  | 4.93                         | 4.71                      | -0.098               | 2.45                     | 11.23                         | 0.3625 | 7.863                             | 0.172              | 7.308   | 7.748           | 7.867  | 7.986           | 8.369                   |         |
| DOCK7   | upLP17ReUSi9fS2DIU | rs10889333 | 4.93                         | 4.71                      | 0.098                | 2.25                     | 36.63                         | 0.3575 | 7.863                             | 0.172              | 7.308   | 7.748           | 7.867  | 7.986           | 8.369                   |         |
| DOCK7   | upLP17ReUSi9fS2DIU | rs10889337 | 4.93                         | 4.71                      | 0.098                | 2.45                     | 60.21                         | 0.3625 | 7.863                             | 0.172              | 7.308   | 7.748           | 7.867  | 7.986           | 8.369                   |         |
| DOCK7   | upLP17ReUSi9fS2DIU | rs11207993 | 3.95                         | 3.78                      | -0.077               | 1.94                     | -109.5                        | 0.191  | 7.863                             | 0.172              | 7.308   | 7.748           | 7.867  | 7.986           | 8.369                   |         |
| DOCK7   | upLP17ReUSi9fS2DIU | rs2031373  | 5.42                         | 5.18                      | 0.109                | 1.87                     | -70.68                        | 0.385  | 7.863                             | 0.172              | 7.308   | 7.748           | 7.867  | 7.986           | 8.369                   |         |
| DOCK7   | upLP17ReUSi9fS2DIU | rs10889353 | 5.02                         | 4.80                      | -0.099               | 2.22                     | -35.77                        | 0.36   | 7.863                             | 0.172              | 7.308   | 7.748           | 7.867  | 7.986           | 8.369                   |         |
| DOCK7   | upLP17ReUSi9fS2DIU | rs4587594  | 5.02                         | 4.80                      | 0.099                | 2.36                     | -20.04                        | 0.36   | 7.863                             | 0.172              | 7.308   | 7.748           | 7.867  | 7.986           | 8.369                   |         |
| DOPEY1  | 019BJAIEJY7ooR0qLU | rs12209871 | 3.3                          | 3.16                      | -0.063               | 1.59                     | -31.33                        | 0.1275 | 7.828                             | 0.152              | 7.307   | 7.753           | 7.838  | 7.931           | 8.32                    |         |
| DOPEY1  | 019BJAIEJY7ooR0qLU | rs12191538 | 3.96                         | 3.79                      | -0.077               | 1.84                     | -16.23                        | 0.1175 | 7.828                             | 0.152              | 7.307   | 7.753           | 7.838  | 7.931           | 8.32                    |         |
| DOPEY1  | 019BJAIEJY7ooR0qLU | rs4706980  | 4.98                         | 4.76                      | 0.099                | 2.61                     | -39.45                        | 0.115  | 7.828                             | 0.152              | 7.307   | 7.753           | 7.838  | 7.931           | 8.32                    |         |
| DOT1L   | EpJ.1qukppEvorByj8 | rs10407022 | 3.74                         | 3.58                      | -0.07                | 0.74                     | 19.46                         | 0.1802 | 7.192                             | 0.07               | 7.112   | 7.154           | 7.177  | 7.208           | 7.728                   |         |
| DPYSL4  | cXl3juDSITwIber_CU | rs870552   | 9.98                         | 9.52                      | -0.201               | 2.48                     | -29.82                        | 0.4    | 7.942                             | 0.699              | 7.117   | 7.322           | 7.76   | 8.388           | 9.872                   |         |
| DPYSL4  | cXl3juDSITwIber_CU | rs7915260  | 9.24                         | 8.82                      | 0.195                | 1.75                     | -22.87                        | 0.4799 | 7.942                             | 0.699              | 7.117   | 7.322           | 7.76   | 8.388           | 9.872                   |         |
| DPYSL4  | cXl3juDSITwIber_CU | rs4880341  | 10.78                        | 10.29                     | -0.222               | 1.89                     | -7.71                         | 0.445  | 7.942                             | 0.699              | 7.117   | 7.322           | 7.76   | 8.388           | 9.872                   |         |
| DPYSL4  | cXl3juDSITwIber_CU | rs2637648  | 5.09                         | 4.86                      | -0.105               | 3.02                     | -4.18                         | 0.099  | 7.942                             | 0.699              | 7.117   | 7.322           | 7.76   | 8.388           | 9.872                   |         |
| DPYSL4  | cXl3juDSITwIber_CU | rs1873504  | 7.55                         | 7.22                      | -0.153               | 2.18                     | 1.87                          | 0.1825 | 7.942                             | 0.699              | 7.117   | 7.322           | 7.76   | 8.388           | 9.872                   |         |
| DPYSL4  | cXl3juDSITwIber_CU | rs2101613  | 9.82                         | 9.37                      | 0.203                | 2.24                     | 2.36                          | 0.4749 | 7.942                             | 0.699              | 7.117   | 7.322           | 7.76   | 8.388           | 9.872                   |         |
| DPYSL4  | cXl3juDSITwIber_CU | rs923662   | 6.52                         | 6.23                      | -0.131               | 1.98                     | 2.7                           | 0.1809 | 7.942                             | 0.699              | 7.117   | 7.322           | 7.76   | 8.388           | 9.872                   |         |
| DPYSL4  | cXl3juDSITwIber_CU | rs2818405  | 6.71                         | 6.42                      | 0.137                | 3.23                     | 12.61                         | 0.1156 | 7.942                             | 0.699              | 7.117   | 7.322           | 7.76   | 8.388           | 9.872                   |         |
| DPYSL4  | cXl3juDSITwIber_CU | rs2035804  | 5.85                         | 5.59                      | -0.117               | 1.87                     | 15.11                         | 0.1925 | 7.942                             | 0.699              | 7.117   | 7.322           | 7.76   | 8.388           | 9.872                   |         |
| DSCR5   | cnfv6jwTjixd1HYdTU | rs2843964  | 9.21                         | 8.79                      | -0.18                | 2.86                     | -3.05                         | 0.3775 | 9.817                             | 0.288              | 8.795   | 9.672           | 9.842  | 10.001          | 10.542                  |         |
| DSCR5   | 9131UeadVLaZ_Zogdl | rs2843964  | 6.97                         | 6.66                      | -0.137               | 1.05                     | -3.05                         | 0.3775 | 8.417                             | 0.362              | 7.207   | 8.189           | 8.429  | 8.641           | 9.869                   |         |
| DSCR5   | 9131UeadVLaZ_Zogdl | rs1015549  | 7.21                         | 6.89                      | 0.147                | 0.74                     | 3.49                          | 0.4472 | 8.417                             | 0.362              | 7.207   | 8.189           | 8.429  | 8.641           | 9.869                   |         |
| DSCR5   | cnfv6jwTjixd1HYdTU | rs1015549  | 5.6                          | 5.36                      | 0.112                | 1.46                     | 3.92                          | 0.4472 | 9.817                             | 0.288              | 8.795   | 9.672           | 9.842  | 10.001          | 10.542                  |         |
| DSCR5   | cnfv6jwTjixd1HYdTU | rs2032088  | 9.38                         | 8.96                      | 0.187                | 3.02                     | 32.38                         | 0.34   | 9.817                             | 0.288              | 8.795   | 9.672           | 9.842  | 10.001          | 10.542                  |         |
| DSCR5   | 9131UeadVLaZ_Zogdl | rs2032088  | 8.53                         | 8.15                      | 0.171                | 1.2                      | 31.94                         | 0.34   | 8.417                             | 0.362              | 7.207   | 8.189           | 8.429  | 8.641           | 9.869                   |         |
| DSCR5   | 9131UeadVLaZ_Zogdl | rs1003719  | 5.61                         | 5.36                      | -0.112               | 0.62                     | 45.7                          | 0.42   | 8.417                             | 0.362              | 7.207   | 8.189           | 8.429  | 8.641           | 9.869                   |         |
| DSCR5   | cnfv6jwTjixd1HYdTU | rs1003719  | 5.06                         | 4.84                      | -0.1                 | 1.32                     | 46.14                         | 0.42   | 9.817                             | 0.288              | 8.795   | 9.672           | 9.842  | 10.001          | 10.542                  |         |
| DSCR5   | cnfv6jwTjixd1HYdTU | rs1003721  | 4.74                         | 4.53                      | 0.093                | 1.06                     | 47.7                          | 0.475  | 9.817                             | 0.288              | 8.795   | 9.672           | 9.842  | 10.001          | 10.542                  |         |
| DSCR5   | 9131UeadVLaZ_Zogdl | rs1003721  | 4.57                         | 4.43                      | 0.089                | 0.44                     | 47.26                         | 0.475  | 8.417                             | 0.362              | 7.207   | 8.189           | 8.429  | 8.641           | 9.869                   |         |
| DUS3L   | HiCFaZ.edi6e19e5aw | rs2436487  | 3.39                         | 3.24                      | 0.063                | 1.08                     | -1.63                         | 0.1834 | 9.331                             | 0.37               | 8.52    | 9.073           | 9.294  | 9.512           | 10.445                  |         |
| DUS3L   | HiCFaZ.edi6e19e5aw | rs2260187  | 3.61                         | 3.45                      | -0.068               | 1.07                     | 8.61                          | 0.1834 | 9.331                             | 0.37               | 8.52    | 9.073           | 9.294  | 9.512           | 10.445                  |         |
| DUSP14  | T6pdPBX8iEJ.IUp5oU | rs853231   | 12.91                        | 12.31                     | 0.264                | 5.01                     | -35.62                        | 0.4061 | 8.303                             | 0.227              | 7.647   | 8.13            | 8.325  | 8.448           | 9.055                   |         |
| DUSP14  | T6pdPBX8iEJ.IUp5oU | rs2074412  | 13.8                         | 13.16                     | -0.277               | 4                        | -10.94                        | 0.4025 | 8.303                             | 0.227              | 7.647   | 8.13            | 8.325  | 8.448           | 9.055                   |         |
| DUSP14  | T6pdPBX8iEJ.IUp5oU | rs853234   | 13.33                        | 12.71                     | -0.26                | 3.72                     | -6.96                         | 0.35   | 8.303                             | 0.227              | 7.647   | 8.13            | 8.325  | 8.448           | 9.055                   |         |
| DUSP14  | T6pdPBX8iEJ.IUp5oU | rs853195   | 12.93                        | 12.33                     | 0.252                | 3.57                     | -1.75                         | 0.3525 | 8.303                             | 0.227              | 7.647   | 8.13            | 8.325  | 8.448           | 9.055                   |         |
| DUSP14  | T6pdPBX8iEJ.IUp5oU | rs4794755  | 22.45                        | 21.39                     | 0.406                | 5.53                     | -6.61                         | 0.1425 | 8.303                             | 0.227              | 7.647   | 8.13            | 8.325  | 8.448           | 9.055                   |         |
| DUSP14  | T6pdPBX8iEJ.IUp5oU | rs2158235  | 8.32                         | 7.94                      | 0.17                 | 1.44                     | 11.12                         | 0.42   | 8.303                             | 0.227              | 7.647   | 8.13            | 8.325  | 8.448           | 9.055                   |         |
| DUSP14  | T6pdPBX8iEJ.IUp5oU | rs3094501  | 4.88                         | 4.66                      | 0.098                | 0.73                     | 26.34                         | 0.4    | 8.303                             | 0.227              | 7.647   | 8.13            | 8.325  | 8.448           | 9.055                   |         |
| DUSP14  | T6pdPBX8iEJ.IUp5oU | rs3110621  | 6.46                         | 6.17                      | 0.13                 | 1.84                     | 33.32                         | 0.3543 | 8.303                             | 0.227              | 7.647   | 8.13            | 8.325  | 8.448           | 9.055                   |         |
| DUSP14  | T6pdPBX8iEJ.IUp5oU | rs1048701  | 3.29                         | 3.15                      | 0.063                | 0.94                     | 37.14                         | 0.4675 | 8.303                             | 0.227              | 7.647   | 8.13            | 8.325  | 8.448           | 9.055                   |         |
| DYNLT1  | WbS5faHtz_FSULzpc  | rs12179730 | 3.37                         | 3.23                      | 0.066                | 0.84                     | 44.1                          | 0.175  | 10.496                            | 0.315              | 9.559   | 10.301          | 10.497 | 11.325          |                         |         |
| EDG7    | fk1XUS10kouESkLEw  | rs12567433 | 4.62                         | 4.42                      | -0.095               | 1.34                     | 44.56                         | 0.2959 | 7.143                             | 0.027              | 7.099   | 7.124           | 7.138  | 7.156           | 7.23                    |         |
| EDN3    | Tq7UqVbiiE.COuzhik | rs259956   | 4.36                         | 4.17                      | -0.086               | 1.76                     | -46.2                         | 0.49   | 7.144                             | 0.035              | 7.098   | 7.12            | 7.138  | 7.159           | 7.367                   |         |
| EDN3    | Tq7UqVbiiE.COuzhik | rs6128525  | 3.62                         | 3.46                      | 0.069                | 1.19                     | -28.58                        | 0.2688 | 7.144                             | 0.035              | 7.098   | 7.12            | 7.138  | 7.159           | 7.367                   |         |
| EFEMP2  | WAdR3oSZSiler1PXBO | rs11227311 | 5.14                         | 4.91                      | 0.097                | 2.6                      | -48.66                        | 0.465  | 7.945                             | 0.329              | 7.276   | 7.715           | 7.895  | 8.114           | 9.318                   | Yes     |



| Symbol | Lumi nuID           | SNP        | Population-based | Population-based  | % Variance | Family-based     | Distance from | MAF    | Mean   | Transcript abundance (log2 scale) |            |            |            |         | SNP    |         |
|--------|---------------------|------------|------------------|-------------------|------------|------------------|---------------|--------|--------|-----------------------------------|------------|------------|------------|---------|--------|---------|
|        |                     |            | association      | association       |            | association      |               |        |        | transcript (kb)                   | Standard   | 25th       | Median     | 75th    |        | Maximum |
|        |                     |            | p-value (-log10) | p-value (-log10), | Explained  | p-value (-log10) |               |        |        | Deviation                         | percentile | percentile | percentile | Maximum | under  |         |
|        |                     |            | p-value (-log10) | GC adj.           |            |                  |               |        |        |                                   |            |            |            |         | probe  |         |
| EFEMP2 | WAdR3oSZSiler1PXB0  | rs635375   | 3.58             | 3.43              | 0.067      | 2.39             | -11.92        | 0.3166 | 7.945  | 0.329                             | 7.276      | 7.715      | 7.895      | 8.114   | 9.318  | Yes     |
| EFEMP2 | WAdR3oSZSiler1PXB0  | rs13817    | 3.43             | 3.28              | 0.063      | 2.46             | -5.58         | 0.315  | 7.945  | 0.329                             | 7.276      | 7.715      | 7.895      | 8.114   | 9.318  | Yes     |
| EFEMP2 | WAdR3oSZSiler1PXB0  | rs501630   | 4.97             | 4.76              | -0.096     | 2.15             | -2.94         | 0.4179 | 7.945  | 0.329                             | 7.276      | 7.715      | 7.895      | 8.114   | 9.318  | Yes     |
| EFEMP2 | WAdR3oSZSiler1PXB0  | rs653914   | 4.15             | 3.97              | 0.077      | 1.53             | 36.3          | 0.4225 | 7.945  | 0.329                             | 7.276      | 7.715      | 7.895      | 8.114   | 9.318  | Yes     |
| EFHC1  | Hgkdm0PSBTtYCYgmXk  | rs474848   | 3.88             | 3.72              | -0.074     | 1.77             | -13.08        | 0.2775 | 7.404  | 0.132                             | 7.136      | 7.312      | 7.389      | 7.476   | 7.924  |         |
| EFHC1  | Hgkdm0PSBTtYCYgmXk  | rs17651289 | 4.66             | 4.46              | 0.09       | 2.85             | -10.06        | 0.1975 | 7.404  | 0.132                             | 7.136      | 7.312      | 7.389      | 7.476   | 7.924  |         |
| EFHC1  | Hgkdm0PSBTtYCYgmXk  | rs649330   | 4.66             | 4.46              | -0.09      | 2.85             | -9.28         | 0.1975 | 7.404  | 0.132                             | 7.136      | 7.312      | 7.389      | 7.476   | 7.924  |         |
| EFHC1  | Hgkdm0PSBTtYCYgmXk  | rs614570   | 6.29             | 6.01              | -0.125     | 1.79             | 34.14         | 0.425  | 7.404  | 0.132                             | 7.136      | 7.312      | 7.389      | 7.476   | 7.924  |         |
| EFHC1  | Hgkdm0PSBTtYCYgmXk  | rs9395795  | 5.72             | 5.47              | -0.117     | 1.75             | -25.28        | 0.4875 | 7.404  | 0.132                             | 7.136      | 7.312      | 7.389      | 7.476   | 7.924  |         |
| EFHC1  | Hgkdm0PSBTtYCYgmXk  | rs2181274  | 5.46             | 5.22              | 0.113      | 2.42             | -20.86        | 0.3212 | 7.404  | 0.132                             | 7.136      | 7.312      | 7.389      | 7.476   | 7.924  |         |
| EFHC1  | Hgkdm0PSBTtYCYgmXk  | rs6912422  | 5.35             | 5.11              | -0.11      | 1.34             | -19.12        | 0.4848 | 7.404  | 0.132                             | 7.136      | 7.312      | 7.389      | 7.476   | 7.924  |         |
| EFHC1  | Hgkdm0PSBTtYCYgmXk  | rs941967   | 4.45             | 4.26              | -0.086     | 4.25             | 11.87         | 0.2425 | 7.404  | 0.132                             | 7.136      | 7.312      | 7.389      | 7.476   | 7.924  |         |
| EID1   | WnreoAXlc0OLO_W68U  | rs4775777  | 3.31             | 3.17              | 0.065      | 2.15             | -38.68        | 0.4774 | 7.68   | 0.184                             | 7.13       | 7.563      | 7.687      | 7.805   | 8.355  |         |
| EID1   | WnreoAXlc0OLO_W68U  | rs16961733 | 13.39            | 12.77             | 0.271      | 4.36             | -21.93        | 0.105  | 7.68   | 0.184                             | 7.13       | 7.563      | 7.687      | 7.805   | 8.355  |         |
| EID1   | WnreoAXlc0OLO_W68U  | rs10519193 | 6.08             | 5.81              | -0.126     | 2.18             | -7.34         | 0.2825 | 7.68   | 0.184                             | 7.13       | 7.563      | 7.687      | 7.805   | 8.355  |         |
| EID1   | WnreoAXlc0OLO_W68U  | rs4435197  | 3.4              | 3.26              | -0.067     | 2.55             | -4.86         | 0.29   | 7.68   | 0.184                             | 7.13       | 7.563      | 7.687      | 7.805   | 8.355  |         |
| EID1   | WnreoAXlc0OLO_W68U  | rs9806753  | 7.08             | 6.76              | 0.147      | 2.75             | -3.87         | 0.2475 | 7.68   | 0.184                             | 7.13       | 7.563      | 7.687      | 7.805   | 8.355  |         |
| EID1   | WnreoAXlc0OLO_W68U  | rs10519197 | 13.39            | 12.77             | 0.271      | 4.36             | -0.06         | 0.105  | 7.68   | 0.184                             | 7.13       | 7.563      | 7.687      | 7.805   | 8.355  |         |
| EID1   | WnreoAXlc0OLO_W68U  | rs7162426  | 13.39            | 12.77             | 0.271      | 4.36             | 15.29         | 0.105  | 7.68   | 0.184                             | 7.13       | 7.563      | 7.687      | 7.805   | 8.355  |         |
| EID1   | WnreoAXlc0OLO_W68U  | rs12907348 | 3.7              | 3.55              | 0.073      | 2.66             | 18.36         | 0.4325 | 7.68   | 0.184                             | 7.13       | 7.563      | 7.687      | 7.805   | 8.355  |         |
| EID1   | WnreoAXlc0OLO_W68U  | rs4775785  | 8.56             | 8.18              | 0.176      | 2.73             | 19.95         | 0.1425 | 7.68   | 0.184                             | 7.13       | 7.563      | 7.687      | 7.805   | 8.355  |         |
| EID1   | WnreoAXlc0OLO_W68U  | rs8023445  | 11.14            | 10.63             | 0.227      | 3.92             | 20.41         | 0.105  | 7.68   | 0.184                             | 7.13       | 7.563      | 7.687      | 7.805   | 8.355  |         |
| EID1   | WnreoAXlc0OLO_W68U  | rs1007662  | 4.48             | 4.29              | -0.09      | 1.36             | 42.93         | 0.27   | 7.68   | 0.184                             | 7.13       | 7.563      | 7.687      | 7.805   | 8.355  |         |
| EID2   | KoJv45YM0mA10sRou   | rs2082483  | 4.17             | 3.99              | -0.082     | 0.84             | 16.75         | 0.051  | 8.955  | 0.265                             | 7.126      | 8.763      | 9.027      | 9.231   | 9.738  |         |
| EID3   | 36uKgOPUvI0koBKl8w  | rs10778311 | 5.25             | 5.02              | -0.102     | 1.61             | -39.49        | 0.3    | 8.579  | 0.265                             | 7.69       | 8.437      | 8.609      | 8.766   | 9.288  |         |
| EID3   | 36uKgOPUvI0koBKl8w  | rs7294778  | 4.01             | 3.84              | -0.077     | 0.79             | -8.09         | 0.4525 | 8.579  | 0.265                             | 7.69       | 8.437      | 8.609      | 8.766   | 9.288  |         |
| EID3   | 36uKgOPUvI0koBKl8w  | rs10861197 | 4.25             | 4.07              | -0.082     | 0.87             | 7.05          | 0.4497 | 8.579  | 0.265                             | 7.69       | 8.437      | 8.609      | 8.766   | 9.288  |         |
| EID3   | 36uKgOPUvI0koBKl8w  | rs7977553  | 3.62             | 3.47              | 0.069      | 0.88             | 49            | 0.3825 | 8.579  | 0.265                             | 7.69       | 8.437      | 8.609      | 8.766   | 9.288  |         |
| EIF2B2 | Zi7554JE1_Q7qLkSi0  | rs11850328 | 4.26             | 4.07              | 0.083      | 1.4              | -43.36        | 0.3775 | 9.237  | 0.21                              | 8.149      | 9.11       | 9.256      | 9.383   | 9.701  |         |
| EIF2B2 | Zi7554JE1_Q7qLkSi0  | rs174994   | 7.57             | 7.23              | -0.147     | 1.49             | -35.51        | 0.4899 | 9.237  | 0.21                              | 8.149      | 9.11       | 9.256      | 9.383   | 9.701  |         |
| EIF2B2 | Zi7554JE1_Q7qLkSi0  | rs175057   | 7.13             | 6.81              | -0.14      | 1.43             | 13.34         | 0.4698 | 9.237  | 0.21                              | 8.149      | 9.11       | 9.256      | 9.383   | 9.701  |         |
| EIF2S2 | KowqTEZ512f375WH2w  | rs2268086  | 5                | 4.78              | 0.098      | 2.21             | -27.38        | 0.4075 | 8.161  | 0.16                              | 7.829      | 8.062      | 8.148      | 8.26    | 8.799  |         |
| EIF2S2 | KowqTEZ512f375WH2w  | rs2268089  | 3.44             | 3.30              | -0.064     | 1.69             | -8.82         | 0.33   | 8.161  | 0.16                              | 7.829      | 8.062      | 8.148      | 8.26    | 8.799  |         |
| EIF4E3 | 9UUtp.otGonLI50RP8  | rs13085841 | 3.66             | 3.50              | -0.066     | 0.29             | 25.66         | 0.39   | 9.24   | 0.393                             | 7.346      | 9.011      | 9.258      | 9.492   | 9.986  |         |
| EIF4E3 | 9UUtp.otGonLI50RP8  | rs6804667  | 3.49             | 3.34              | 0.064      | 0.45             | 26.14         | 0.315  | 9.24   | 0.393                             | 7.346      | 9.011      | 9.258      | 9.492   | 9.986  |         |
| EIF5A  | WMlfxXlRRVbleqFJvc  | rs7220464  | 4.63             | 4.43              | 0.091      | 1.94             | -0.13         | 0.385  | 11.045 | 0.361                             | 9.367      | 10.875     | 11.054     | 11.258  | 11.959 |         |
| EIF5A  | WMlfxXlRRVbleqFJvc  | rs7216490  | 5.56             | 5.32              | -0.113     | 3.17             | 5.93          | 0.4925 | 11.045 | 0.361                             | 9.367      | 10.875     | 11.054     | 11.258  | 11.959 |         |
| ELA1   | iOkLPe1OiaUn_7Uliqk | rs4761998  | 10               | 9.55              | -0.192     | 5.73             | -40.07        | 0.3275 | 8.66   | 0.454                             | 7.685      | 8.349      | 8.611      | 9.002   | 9.683  |         |
| ELA1   | iOkLPe1OiaUn_7Uliqk | rs4762040  | 7.03             | 6.71              | 0.138      | 2.39             | -8.8          | 0.4372 | 8.66   | 0.454                             | 7.685      | 8.349      | 8.611      | 9.002   | 9.683  |         |
| ELA1   | iOkLPe1OiaUn_7Uliqk | rs4762042  | 7.08             | 6.76              | 0.138      | 2.22             | -6.51         | 0.4375 | 8.66   | 0.454                             | 7.685      | 8.349      | 8.611      | 9.002   | 9.683  |         |
| ELA1   | iOkLPe1OiaUn_7Uliqk | rs10876162 | 15.5             | 14.78             | -0.291     | 7                | 2.06          | 0.305  | 8.66   | 0.454                             | 7.685      | 8.349      | 8.611      | 9.002   | 9.683  |         |
| ELA1   | iOkLPe1OiaUn_7Uliqk | rs3847862  | 15.23            | 14.52             | -0.285     | 6.27             | -7.96         | 0.395  | 8.66   | 0.454                             | 7.685      | 8.349      | 8.611      | 9.002   | 9.683  |         |
| ELA1   | iOkLPe1OiaUn_7Uliqk | rs4761874  | 6.1              | 5.83              | -0.12      | 3.07             | 13.62         | 0.295  | 8.66   | 0.454                             | 7.685      | 8.349      | 8.611      | 9.002   | 9.683  |         |
| ELA1   | iOkLPe1OiaUn_7Uliqk | rs10783433 | 3.7              | 3.55              | -0.072     | 2.37             | 14.83         | 0.3883 | 8.66   | 0.454                             | 7.685      | 8.349      | 8.611      | 9.002   | 9.683  |         |
| ELA1   | iOkLPe1OiaUn_7Uliqk | rs3782473  | 3.65             | 3.49              | 0.068      | 2.42             | 15.81         | 0.215  | 8.66   | 0.454                             | 7.685      | 8.349      | 8.611      | 9.002   | 9.683  |         |
| ELA1   | iOkLPe1OiaUn_7Uliqk | rs7970638  | 3.87             | 3.70              | -0.073     | 2.46             | 18.05         | 0.1825 | 8.66   | 0.454                             | 7.685      | 8.349      | 8.611      | 9.002   | 9.683  |         |
| ELA1   | iOkLPe1OiaUn_7Uliqk | rs11614836 | 7.53             | 7.19              | -0.148     | 3.25             | 33.67         | 0.46   | 8.66   | 0.454                             | 7.685      | 8.349      | 8.611      | 9.002   | 9.683  |         |
| ELA1   | iOkLPe1OiaUn_7Uliqk | rs10783436 | 3.53             | 3.38              | -0.068     | 2.71             | 33.84         | 0.44   | 8.66   | 0.454                             | 7.685      | 8.349      | 8.611      | 9.002   | 9.683  |         |
| EMR1   | o3SfBOgOKNUUliUgV3o | rs897738   | 4.76             | 4.55              | -0.09      | 3.85             | 14.31         | 0.2575 | 8.126  | 0.372                             | 7.311      | 7.899      | 8.084      | 8.322   | 9.536  |         |
| EMR1   | o3SfBOgOKNUUliUgV3o | rs443658   | 4.68             | 4.48              | 0.088      | 3.73             | 16.34         | 0.2563 | 8.126  | 0.372                             | 7.311      | 7.899      | 8.084      | 8.322   | 9.536  |         |
| EMR1   | o3SfBOgOKNUUliUgV3o | rs370094   | 4.69             | 4.49              | 0.089      | 3.72             | 16.55         | 0.2563 | 8.126  | 0.372                             | 7.311      | 7.899      | 8.084      | 8.322   | 9.536  |         |
| EMR1   | o3SfBOgOKNUUliUgV3o | rs391020   | 3.99             | 3.82              | -0.074     | 2.61             | 18.31         | 0.2875 | 8.126  | 0.372                             | 7.311      | 7.899      | 8.084      | 8.322   | 9.536  |         |
| EMR1   | o3SfBOgOKNUUliUgV3o | rs8113805  | 4.76             | 4.55              | -0.09      | 3.54             | 20.98         | 0.2575 | 8.126  | 0.372                             | 7.311      | 7.899      | 8.084      | 8.322   | 9.536  |         |
| EMR1   | o3SfBOgOKNUUliUgV3o | rs445817   | 4.67             | 4.47              | -0.088     | 3.54             | 21.87         | 0.2588 | 8.126  | 0.372                             | 7.311      | 7.899      | 8.084      | 8.322   | 9.536  |         |
| EMR1   | o3SfBOgOKNUUliUgV3o | rs606384   | 3.44             | 3.30              | 0.063      | 1.87             | 22.83         | 0.295  | 8.126  | 0.372                             | 7.311      | 7.899      | 8.084      | 8.322   | 9.536  |         |
| EMR1   | o3SfBOgOKNUUliUgV3o | rs466876   | 5.71             | 5.45              | 0.107      | 3.33             | 26.12         | 0.195  | 8.126  | 0.372                             | 7.311      | 7.899      | 8.084      | 8.322   | 9.536  |         |
| EMR1   | o3SfBOgOKNUUliUgV3o | rs467439   | 7.18             | 6.86              | 0.139      | 3.85             | -23.97        | 0.365  | 8.126  | 0.372                             | 7.311      | 7.899      | 8.084      | 8.322   | 9.536  |         |
| EMR1   | o3SfBOgOKNUUliUgV3o | rs252564   | 8.74             | 8.34              | 0.165      | 3.75             | -17.73        | 0.25   | 8.126  | 0.372                             | 7.311      | 7.899      | 8.084      | 8.322   | 9.536  |         |
| EMR1   | o3SfBOgOKNUUliUgV3o | rs4807916  | 8.54             | 8.15              | -0.16      | 4.04             | -14.09        | 0.275  | 8.126  | 0.372                             | 7.311      | 7.899      | 8.084      | 8.322   | 9.536  |         |
| EMR1   | o3SfBOgOKNUUliUgV3o | rs3895916  | 9.31             | 8.89              | 0.181      | 3.73             | -12.47        | 0.4221 | 8.126  | 0.372                             | 7.311      | 7.899      | 8.084      | 8.322   | 9.536  |         |
| EMR1   | o3SfBOgOKNUUliUgV3o | rs8112929  | 5.26             | 5.02              | 0.099      | 2.94             | -6.1          | 0.1    | 8.126  | 0.372                             | 7.311      | 7.899      | 8.084      | 8.322   | 9.536  |         |
| EMR1   | o3SfBOgOKNUUliUgV3o | rs252552   | 8.8              | 8.40              | -0.17      | 3.48             | -5.17         | 0.4121 | 8.126  | 0.372                             | 7.311      | 7.899      | 8.084      | 8.322   | 9.536  |         |

| Symbol | Lumi nuID           | SNP        | Population-based association |                      |                           | Family-based association |                               |        | Transcript abundance (log2 scale) |                    |         |                 |        |                 | SNP mapping under probe |
|--------|---------------------|------------|------------------------------|----------------------|---------------------------|--------------------------|-------------------------------|--------|-----------------------------------|--------------------|---------|-----------------|--------|-----------------|-------------------------|
|        |                     |            | p-value (-log10)             | % Variance Explained | p-value (-log10), GC adj. | p-value (-log10)         | Distance from transcript (kb) | MAF    | Mean                              | Standard Deviation | Minimum | 25th percentile | Median | 75th percentile |                         |
| EMR1   | o3SfBOgOKNUUIUgV3o  | rs457749   | 4.83                         | 4.62                 | -0.094                    | 3.11                     | -0.07                         | 0.24   | 8.126                             | 0.372              | 7.311   | 7.899           | 8.084  | 8.322           | 9.536                   |
| EMR1   | o3SfBOgOKNUUIUgV3o  | rs465543   | 4.83                         | 4.62                 | 0.094                     | 3.11                     | 1.4                           | 0.24   | 8.126                             | 0.372              | 7.311   | 7.899           | 8.084  | 8.322           | 9.536                   |
| EMR1   | o3SfBOgOKNUUIUgV3o  | rs7259047  | 8.69                         | 8.30                 | 0.168                     | 4.4                      | 2.95                          | 0.43   | 8.126                             | 0.372              | 7.311   | 7.899           | 8.084  | 8.322           | 9.536                   |
| EMR1   | o3SfBOgOKNUUIUgV3o  | rs465838   | 4.37                         | 4.18                 | 0.083                     | 2.83                     | 4.38                          | 0.235  | 8.126                             | 0.372              | 7.311   | 7.899           | 8.084  | 8.322           | 9.536                   |
| ENC1   | EgevnsgEzBAqSV1H3o  | rs300262   | 3.62                         | 3.46                 | -0.069                    | 0.15                     | -16.53                        | 0.3875 | 7.459                             | 0.279              | 7.112   | 7.263           | 7.395  | 7.592           | 9.076                   |
| ENC1   | EgevnsgEzBAqSV1H3o  | rs10079609 | 12.15                        | 11.59                | 0.244                     | 3.8                      | -4.62                         | 0.1425 | 7.459                             | 0.279              | 7.112   | 7.263           | 7.395  | 7.592           | 9.076                   |
| ENC1   | EgevnsgEzBAqSV1H3o  | rs10075142 | 14.83                        | 14.14                | -0.291                    | 4.33                     | 3.75                          | 0.1325 | 7.459                             | 0.279              | 7.112   | 7.263           | 7.395  | 7.592           | 9.076                   |
| ENC1   | EgevnsgEzBAqSV1H3o  | rs300240   | 3.36                         | 3.21                 | -0.064                    | 0.72                     | -6.08                         | 0.3342 | 7.459                             | 0.279              | 7.112   | 7.263           | 7.395  | 7.592           | 9.076                   |
| ENC1   | EgevnsgEzBAqSV1H3o  | rs10474420 | 13.35                        | 12.73                | 0.267                     | 3.98                     | -2.24                         | 0.14   | 7.459                             | 0.279              | 7.112   | 7.263           | 7.395  | 7.592           | 9.076                   |
| ENC1   | EgevnsgEzBAqSV1H3o  | rs7704467  | 3.88                         | 3.72                 | -0.074                    | 0.71                     | 7.59                          | 0.3325 | 7.459                             | 0.279              | 7.112   | 7.263           | 7.395  | 7.592           | 9.076                   |
| ENC1   | EgevnsgEzBAqSV1H3o  | rs6864196  | 13.75                        | 13.11                | 0.27                      | 4.41                     | 7.93                          | 0.145  | 7.459                             | 0.279              | 7.112   | 7.263           | 7.395  | 7.592           | 9.076                   |
| ENDOG  | QFZJxQBzt5EqUd9eU   | rs1572912  | 4.42                         | 4.23                 | 0.086                     | 2.01                     | -15.22                        | 0.2625 | 8.453                             | 0.332              | 7.69    | 8.219           | 8.459  | 8.68            | 9.322                   |
| ENDOG  | QFZJxQBzt5EqUd9eU   | rs15676    | 4.87                         | 4.66                 | -0.098                    | 1.92                     | -8.75                         | 0.2702 | 8.453                             | 0.332              | 7.69    | 8.219           | 8.459  | 8.68            | 9.322                   |
| ENDOG  | QFZJxQBzt5EqUd9eU   | rs2997922  | 5.6                          | 5.36                 | 0.113                     | 2.04                     | -0.04                         | 0.2775 | 8.453                             | 0.332              | 7.69    | 8.219           | 8.459  | 8.68            | 9.322                   |
| ENDOG  | QFZJxQBzt5EqUd9eU   | rs2280843  | 3.85                         | 3.69                 | 0.077                     | 0.7                      | 0.11                          | 0.23   | 8.453                             | 0.332              | 7.69    | 8.219           | 8.459  | 8.68            | 9.322                   |
| ENDOG  | QFZJxQBzt5EqUd9eU   | rs2293968  | 5.6                          | 5.36                 | -0.113                    | 2.04                     | 2.29                          | 0.2775 | 8.453                             | 0.332              | 7.69    | 8.219           | 8.459  | 8.68            | 9.322                   |
| ENDOG  | QFZJxQBzt5EqUd9eU   | rs2293966  | 5.6                          | 5.36                 | -0.113                    | 2.04                     | 6.88                          | 0.2775 | 8.453                             | 0.332              | 7.69    | 8.219           | 8.459  | 8.68            | 9.322                   |
| ENDOG  | QFZJxQBzt5EqUd9eU   | rs10988134 | 3.85                         | 3.69                 | -0.077                    | 0.7                      | 10.45                         | 0.23   | 8.453                             | 0.332              | 7.69    | 8.219           | 8.459  | 8.68            | 9.322                   |
| ENPP2  | HWAhSWScVIDXhHqHqMU | rs16892827 | 4.26                         | 4.08                 | -0.08                     | 0.27                     | 31.64                         | 0.0875 | 7.525                             | 0.149              | 7.15    | 7.429           | 7.532  | 7.605           | 8.113                   |
| ENPP2  | HWAhSWScVIDXhHqHqMU | rs7840386  | 3.69                         | 3.53                 | 0.068                     | 0.52                     | 2.77                          | 0.2475 | 7.525                             | 0.149              | 7.15    | 7.429           | 7.532  | 7.605           | 8.113                   |
| ENPP4  | 96u3X37ITN4wn86PPk  | rs6921636  | 3.88                         | 3.71                 | 0.078                     | 0.96                     | -17.56                        | 0.4    | 8.895                             | 0.32               | 7.827   | 8.706           | 8.896  | 9.119           | 9.833                   |
| ENPP4  | 96u3X37ITN4wn86PPk  | rs7762549  | 3.88                         | 3.71                 | -0.078                    | 0.96                     | 0.32                          | 0.4    | 8.895                             | 0.32               | 7.827   | 8.706           | 8.896  | 9.119           | 9.833                   |
| ENTPD1 | r21KIT.XU2S70KU19U  | rs7071836  | 3.88                         | 3.71                 | 0.073                     | 1.9                      | -4.88                         | 0.445  | 7.696                             | 0.429              | 7.114   | 7.355           | 7.585  | 7.976           | 9.118                   |
| ENTPD1 | r21KIT.XU2S70KU19U  | rs2051052  | 3.77                         | 3.61                 | 0.071                     | 1.78                     | 5.62                          | 0.4425 | 7.696                             | 0.429              | 7.114   | 7.355           | 7.585  | 7.976           | 9.118                   |
| ENTPD4 | Z3EFHF73enn166556U  | rs17696480 | 4.76                         | 4.56                 | -0.095                    | 2.62                     | -30.75                        | 0.2312 | 8.514                             | 0.455              | 7.102   | 8.221           | 8.47   | 8.8             | 9.989                   |
| ENTPD4 | Z3EFHF73enn166556U  | rs11779953 | 7.27                         | 6.94                 | 0.149                     | 3.35                     | -7.18                         | 0.18   | 8.514                             | 0.455              | 7.102   | 8.221           | 8.47   | 8.8             | 9.989                   |
| ENTPD4 | Z3EFHF73enn166556U  | rs6557672  | 14.31                        | 13.65                | -0.271                    | 4.9                      | -3.9                          | 0.475  | 8.514                             | 0.455              | 7.102   | 8.221           | 8.47   | 8.8             | 9.989                   |
| ENTPD4 | Z3EFHF73enn166556U  | rs12549539 | 9.9                          | 9.45                 | -0.2                      | 3.63                     | 1.11                          | 0.245  | 8.514                             | 0.455              | 7.102   | 8.221           | 8.47   | 8.8             | 9.989                   |
| ENTPD4 | Z3EFHF73enn166556U  | rs2293936  | 7.27                         | 6.94                 | 0.149                     | 3.34                     | -13.43                        | 0.18   | 8.514                             | 0.455              | 7.102   | 8.221           | 8.47   | 8.8             | 9.989                   |
| ENTPD4 | Z3EFHF73enn166556U  | rs4872137  | 12.61                        | 12.03                | -0.242                    | 4.75                     | 1.51                          | 0.5    | 8.514                             | 0.455              | 7.102   | 8.221           | 8.47   | 8.8             | 9.989                   |
| ENTPD4 | Z3EFHF73enn166556U  | rs6557675  | 7.58                         | 7.24                 | 0.149                     | 3.53                     | 19.87                         | 0.32   | 8.514                             | 0.455              | 7.102   | 8.221           | 8.47   | 8.8             | 9.989                   |
| ENTPD4 | Z3EFHF73enn166556U  | rs17770799 | 4.68                         | 4.48                 | -0.092                    | 2.06                     | 27.17                         | 0.155  | 8.514                             | 0.455              | 7.102   | 8.221           | 8.47   | 8.8             | 9.989                   |
| ENTPD4 | Z3EFHF73enn166556U  | rs1010848  | 4.2                          | 4.02                 | -0.082                    | 2.14                     | 31.08                         | 0.34   | 8.514                             | 0.455              | 7.102   | 8.221           | 8.47   | 8.8             | 9.989                   |
| ENTPD4 | Z3EFHF73enn166556U  | rs7832926  | 4.42                         | 4.23                 | 0.085                     | 1.67                     | 34.94                         | 0.2975 | 8.514                             | 0.455              | 7.102   | 8.221           | 8.47   | 8.8             | 9.989                   |
| ENTPD4 | Z3EFHF73enn166556U  | rs4554474  | 6.98                         | 6.67                 | -0.138                    | 2.68                     | 36.12                         | 0.495  | 8.514                             | 0.455              | 7.102   | 8.221           | 8.47   | 8.8             | 9.989                   |
| ENTPD4 | Z3EFHF73enn166556U  | rs4265197  | 6.98                         | 6.67                 | 0.138                     | 3.16                     | 36.23                         | 0.495  | 8.514                             | 0.455              | 7.102   | 8.221           | 8.47   | 8.8             | 9.989                   |
| ENTPD4 | Z3EFHF73enn166556U  | rs4260902  | 3.97                         | 3.80                 | 0.076                     | 1.75                     | 49.73                         | 0.4125 | 8.514                             | 0.455              | 7.102   | 8.221           | 8.47   | 8.8             | 9.989                   |
| EPDR1  | flJd37V6.Xzu_Duvi8  | rs7807193  | 4.58                         | 4.38                 | -0.089                    | 1.65                     | -25.49                        | 0.2638 | 7.4                               | 0.135              | 7.133   | 7.3             | 7.391  | 7.475           | 7.986                   |
| EPDR1  | flJd37V6.Xzu_Duvi8  | rs10488617 | 4.94                         | 4.72                 | 0.097                     | 1.42                     | -23.13                        | 0.2225 | 7.4                               | 0.135              | 7.133   | 7.3             | 7.391  | 7.475           | 7.986                   |
| EPDR1  | flJd37V6.Xzu_Duvi8  | rs1530820  | 3.84                         | 3.68                 | 0.075                     | 1.08                     | -18.91                        | 0.22   | 7.4                               | 0.135              | 7.133   | 7.3             | 7.391  | 7.475           | 7.986                   |
| EPDR1  | flJd37V6.Xzu_Duvi8  | rs6964434  | 5.72                         | 5.46                 | -0.116                    | 2.66                     | 2.65                          | 0.4275 | 7.4                               | 0.135              | 7.133   | 7.3             | 7.391  | 7.475           | 7.986                   |
| EPDR1  | flJd37V6.Xzu_Duvi8  | rs6968251  | 5.78                         | 5.52                 | -0.118                    | 2.69                     | 2.73                          | 0.4296 | 7.4                               | 0.135              | 7.133   | 7.3             | 7.391  | 7.475           | 7.986                   |
| EPDR1  | flJd37V6.Xzu_Duvi8  | rs1349394  | 6.67                         | 6.37                 | 0.133                     | 1.62                     | 4.74                          | 0.3825 | 7.4                               | 0.135              | 7.133   | 7.3             | 7.391  | 7.475           | 7.986                   |
| EPDR1  | flJd37V6.Xzu_Duvi8  | rs3734952  | 4.64                         | 4.44                 | -0.091                    | 1.36                     | 5                             | 0.23   | 7.4                               | 0.135              | 7.133   | 7.3             | 7.391  | 7.475           | 7.986                   |
| EPHA4  | KWeRQNCyfrfuzkpVC8  | rs3770146  | 3.35                         | 3.21                 | 0.061                     | 1.85                     | 61.45                         | 0.3425 | 8.749                             | 0.349              | 7.527   | 8.573           | 8.767  | 8.969           | 9.678                   |
| EPHA4  | KWeRQNCyfrfuzkpVC8  | rs1367241  | 3.51                         | 3.36                 | 0.065                     | 1.92                     | 70.67                         | 0.3475 | 8.749                             | 0.349              | 7.527   | 8.573           | 8.767  | 8.969           | 9.678                   |
| EPHA4  | KWeRQNCyfrfuzkpVC8  | rs6436266  | 3.45                         | 3.30                 | 0.066                     | 1.13                     | 74.49                         | 0.45   | 8.749                             | 0.349              | 7.527   | 8.573           | 8.767  | 8.969           | 9.678                   |
| EPHX2  | iX1F56pFPfLMSK6XxE  | rs2071575  | 6.16                         | 5.88                 | -0.12                     | 1.03                     | -4.05                         | 0.265  | 10.148                            | 0.415              | 8.479   | 9.935           | 10.166 | 10.419          | 11.178                  |
| EPHX2  | iX1F56pFPfLMSK6XxE  | rs13269963 | 6.67                         | 6.38                 | 0.13                      | 1.42                     | -1.88                         | 0.18   | 10.148                            | 0.415              | 8.479   | 9.935           | 10.166 | 10.419          | 11.178                  |
| EPHX2  | iX1F56pFPfLMSK6XxE  | rs4149259  | 3.34                         | 3.20                 | 0.06                      | 0.53                     | 0.01                          | 0.145  | 10.148                            | 0.415              | 8.479   | 9.935           | 10.166 | 10.419          | 11.178                  |
| EPM2A  | fonSKGqlyB7pHyql4Q  | rs10872577 | 3.77                         | 3.61                 | -0.071                    | 3.35                     | -45.88                        | 0.4025 | 7.489                             | 0.12               | 7.131   | 7.417           | 7.489  | 7.556           | 8.002                   |
| EPM2A  | fonSKGqlyB7pHyql4Q  | rs9399558  | 3.77                         | 3.61                 | 0.071                     | 3.35                     | -34.71                        | 0.4025 | 7.489                             | 0.12               | 7.131   | 7.417           | 7.489  | 7.556           | 8.002                   |
| EPM2A  | fonSKGqlyB7pHyql4Q  | rs6903252  | 3.58                         | 3.43                 | -0.068                    | 3.51                     | -23.66                        | 0.4573 | 7.489                             | 0.12               | 7.131   | 7.417           | 7.489  | 7.556           | 8.002                   |
| EPM2A  | fonSKGqlyB7pHyql4Q  | rs951143   | 3.78                         | 3.62                 | -0.071                    | 2.31                     | -13.86                        | 0.465  | 7.489                             | 0.12               | 7.131   | 7.417           | 7.489  | 7.556           | 8.002                   |
| EPM2A  | fonSKGqlyB7pHyql4Q  | rs6570705  | 3.3                          | 3.16                 | -0.061                    | 3.12                     | 14.76                         | 0.43   | 7.489                             | 0.12               | 7.131   | 7.417           | 7.489  | 7.556           | 8.002                   |
| EPM2A  | fonSKGqlyB7pHyql4Q  | rs1292337  | 3.37                         | 3.22                 | 0.063                     | 3.13                     | 21.37                         | 0.4293 | 7.489                             | 0.12               | 7.131   | 7.417           | 7.489  | 7.556           | 8.002                   |
| EPM2A  | fonSKGqlyB7pHyql4Q  | rs697053   | 3.5                          | 3.35                 | -0.065                    | 3.64                     | 43.37                         | 0.4275 | 7.489                             | 0.12               | 7.131   | 7.417           | 7.489  | 7.556           | 8.002                   |
| EPM2A  | fonSKGqlyB7pHyql4Q  | rs702318   | 3.5                          | 3.35                 | 0.065                     | 3.64                     | -51.12                        | 0.4275 | 7.489                             | 0.12               | 7.131   | 7.417           | 7.489  | 7.556           | 8.002                   |
| EPM2A  | fonSKGqlyB7pHyql4Q  | rs2328709  | 3.38                         | 3.24                 | -0.063                    | 3.76                     | 49.83                         | 0.425  | 7.489                             | 0.12               | 7.131   | 7.417           | 7.489  | 7.556           | 8.002                   |
| EPS8   | KXuDOu3iPSpMnR7Kck  | rs3748299  | 4.7                          | 4.49                 | -0.094                    | 2.68                     | -39.41                        | 0.095  | 7.188                             | 0.056              | 7.108   | 7.147           | 7.172  | 7.21            | 7.391                   |
| ERC1   | NVSwSOVvnfgev1XgRc  | rs12313656 | 3.57                         | 3.42                 | 0.067                     | 1                        | -167.5                        | 0.055  | 7.128                             | 0.021              | 7.102   | 7.116           | 7.124  | 7.134           | 7.314                   |
| ERCC6  | QGOF96614gH02f1KVE  | rs7906303  | 3.34                         | 3.20                 | 0.062                     | 0.33                     | -14.34                        | 0.4925 | 7.326                             | 0.084              | 7.159   | 7.266           | 7.317  | 7.38            | 7.609                   |

| Symbol | Lumi nuID           | SNP        | Population-based association |                  | % Variance Explained | Family-based association |                               | Transcript abundance (log2 scale) |       |                    |         |                 |        |                 | SNP mapping under probe |         |
|--------|---------------------|------------|------------------------------|------------------|----------------------|--------------------------|-------------------------------|-----------------------------------|-------|--------------------|---------|-----------------|--------|-----------------|-------------------------|---------|
|        |                     |            | p-value (-log10)             | p-value (-log10) |                      | p-value (-log10)         | Distance from transcript (kb) | MAF                               | Mean  | Standard Deviation | Minimum | 25th percentile | Median | 75th percentile |                         | Maximum |
| ERCC8  | Ef7nr74h0kqAw197k   | rs158570   | 9.52                         | 9.09             | -0.156               | 4.86                     | -15.98                        | 0.42                              | 7.119 | 0.018              | 7.095   | 7.106           | 7.115  | 7.125           | 7.249                   | Yes     |
| ERCC8  | Ef7nr74h0kqAw197k   | rs3101879  | 7.36                         | 7.03             | 0.119                | 3.46                     | 25.98                         | 0.3725                            | 7.119 | 0.018              | 7.095   | 7.106           | 7.115  | 7.125           | 7.249                   | Yes     |
| ERMAP  | ftYKQoAJ4617UCnPKQ  | rs12406643 | 8.61                         | 8.22             | -0.171               | 3.37                     | 0.9                           | 0.155                             | 7.962 | 0.269              | 7.125   | 7.77            | 7.96   | 8.16            | 8.531                   | Yes     |
| ERMAP  | ftYKQoAJ4617UCnPKQ  | rs9960     | 8.6                          | 8.21             | 0.17                 | 2.98                     | 7.13                          | 0.1525                            | 7.962 | 0.269              | 7.125   | 7.77            | 7.96   | 8.16            | 8.531                   | Yes     |
| ERMAP  | ftYKQoAJ4617UCnPKQ  | rs11576627 | 4.3                          | 4.12             | -0.084               | 0.93                     | 15.52                         | 0.1                               | 7.962 | 0.269              | 7.125   | 7.77            | 7.96   | 8.16            | 8.531                   | Yes     |
| ERO1LB | xd1XOcVJSP_7uw6npU  | rs10924691 | 3.51                         | 3.36             | -0.062               | 0.74                     | -23.07                        | 0.1256                            | 7.275 | 0.094              | 7.108   | 7.201           | 7.262  | 7.332           | 7.583                   |         |
| ERP27  | rt_UgvAp7dQtXgdJl   | rs6488724  | 5.65                         | 5.40             | 0.111                | 1.79                     | -34.22                        | 0.3775                            | 9.3   | 0.398              | 7.829   | 9.051           | 9.268  | 9.52            | 11.023                  |         |
| ERP27  | rt_UgvAp7dQtXgdJl   | rs4236     | 5.65                         | 5.40             | 0.111                | 1.87                     | -31.9                         | 0.3775                            | 9.3   | 0.398              | 7.829   | 9.051           | 9.268  | 9.52            | 11.023                  |         |
| ERP27  | rt_UgvAp7dQtXgdJl   | rs918121   | 5.45                         | 5.21             | -0.103               | 2.47                     | 4.26                          | 0.3825                            | 9.3   | 0.398              | 7.829   | 9.051           | 9.268  | 9.52            | 11.023                  |         |
| ERP27  | rt_UgvAp7dQtXgdJl   | rs10772817 | 5.28                         | 5.05             | -0.1                 | 2.28                     | 6.67                          | 0.3775                            | 9.3   | 0.398              | 7.829   | 9.051           | 9.268  | 9.52            | 11.023                  |         |
| ERP27  | rt_UgvAp7dQtXgdJl   | rs10846082 | 5.28                         | 5.05             | 0.1                  | 2.24                     | 7.34                          | 0.3775                            | 9.3   | 0.398              | 7.829   | 9.051           | 9.268  | 9.52            | 11.023                  |         |
| ERP27  | rt_UgvAp7dQtXgdJl   | rs10047541 | 5.44                         | 5.21             | -0.105               | 2.33                     | 8.22                          | 0.3827                            | 9.3   | 0.398              | 7.829   | 9.051           | 9.268  | 9.52            | 11.023                  |         |
| ERP27  | rt_UgvAp7dQtXgdJl   | rs2193360  | 5.28                         | 5.05             | -0.1                 | 2.28                     | 10.04                         | 0.3775                            | 9.3   | 0.398              | 7.829   | 9.051           | 9.268  | 9.52            | 11.023                  |         |
| ERP27  | rt_UgvAp7dQtXgdJl   | rs2445370  | 5.43                         | 5.19             | -0.102               | 2.15                     | -7.34                         | 0.38                              | 9.3   | 0.398              | 7.829   | 9.051           | 9.268  | 9.52            | 11.023                  |         |
| ERP27  | rt_UgvAp7dQtXgdJl   | rs4764137  | 5.56                         | 5.31             | -0.105               | 2.48                     | -2.04                         | 0.38                              | 9.3   | 0.398              | 7.829   | 9.051           | 9.268  | 9.52            | 11.023                  |         |
| ERP27  | rt_UgvAp7dQtXgdJl   | rs4764140  | 5.56                         | 5.31             | -0.105               | 2.48                     | -1.11                         | 0.38                              | 9.3   | 0.398              | 7.829   | 9.051           | 9.268  | 9.52            | 11.023                  |         |
| ERP27  | rt_UgvAp7dQtXgdJl   | rs12320865 | 5.56                         | 5.31             | 0.105                | 2.48                     | 0.37                          | 0.38                              | 9.3   | 0.398              | 7.829   | 9.051           | 9.268  | 9.52            | 11.023                  |         |
| ERP27  | rt_UgvAp7dQtXgdJl   | rs10772821 | 5.63                         | 5.38             | -0.107               | 2.28                     | 0.92                          | 0.3794                            | 9.3   | 0.398              | 7.829   | 9.051           | 9.268  | 9.52            | 11.023                  |         |
| ERP27  | rt_UgvAp7dQtXgdJl   | rs10492146 | 4.19                         | 4.01             | -0.076               | 2.59                     | 14.57                         | 0.27                              | 9.3   | 0.398              | 7.829   | 9.051           | 9.268  | 9.52            | 11.023                  |         |
| ERP27  | rt_UgvAp7dQtXgdJl   | rs10492145 | 4.19                         | 4.01             | -0.076               | 2.5                      | 17.6                          | 0.27                              | 9.3   | 0.398              | 7.829   | 9.051           | 9.268  | 9.52            | 11.023                  |         |
| ERP27  | rt_UgvAp7dQtXgdJl   | rs2445433  | 3.88                         | 3.72             | 0.071                | 1.71                     | 18.75                         | 0.2437                            | 9.3   | 0.398              | 7.829   | 9.051           | 9.268  | 9.52            | 11.023                  |         |
| EVC    | c4IE4KSR0qUqilgijQ  | rs7680768  | 4.18                         | 4.00             | 0.081                | 0.54                     | -6.84                         | 0.475                             | 7.156 | 0.034              | 7.101   | 7.13            | 7.153  | 7.175           | 7.327                   |         |
| EVPL   | IShJR0vFXUXUVLjVA   | rs2069528  | 6.13                         | 5.86             | 0.124                | 3.5                      | -5.45                         | 0.2475                            | 7.305 | 0.117              | 7.12    | 7.233           | 7.288  | 7.357           | 7.725                   |         |
| EVPL   | IShJR0vFXUXUVLjVA   | rs2665993  | 4.9                          | 4.69             | 0.097                | 2.66                     | 6.28                          | 0.3975                            | 7.305 | 0.117              | 7.12    | 7.233           | 7.288  | 7.357           | 7.725                   |         |
| EXT1   | 9klKjqrQnnd31S5I1E  | rs11783511 | 3.3                          | 3.16             | -0.062               | 1.89                     | 15.1                          | 0.44                              | 8.102 | 0.235              | 7.693   | 7.955           | 8.076  | 8.2             | 9.2                     |         |
| EXTL2  | 6PjIt7v0VPI7vy1_9FE | rs3737580  | 5.04                         | 4.82             | -0.103               | 0.51                     | -0.15                         | 0.1025                            | 7.545 | 0.145              | 7.125   | 7.465           | 7.54   | 7.636           | 7.905                   |         |
| EXTL2  | 6PjIt7v0VPI7vy1_9FE | rs12040671 | 5.02                         | 4.80             | -0.101               | 0.2                      | 12.91                         | 0.125                             | 7.545 | 0.145              | 7.125   | 7.465           | 7.54   | 7.636           | 7.905                   |         |
| F2RL1  | BSHqBKISg3u6xAXk64  | rs250760   | 3.75                         | 3.59             | -0.07                | 0.28                     | -47.23                        | 0.4184                            | 7.787 | 0.203              | 7.114   | 7.676           | 7.799  | 7.893           | 8.498                   | Yes     |
| F2RL1  | BSHqBKISg3u6xAXk64  | rs250763   | 3.44                         | 3.30             | -0.062               | 1.09                     | -28.26                        | 0.225                             | 7.787 | 0.203              | 7.114   | 7.676           | 7.799  | 7.893           | 8.498                   | Yes     |
| F2RL1  | BSHqBKISg3u6xAXk64  | rs463466   | 3.99                         | 3.82             | -0.072               | 1.17                     | -22.63                        | 0.3875                            | 7.787 | 0.203              | 7.114   | 7.676           | 7.799  | 7.893           | 8.498                   | Yes     |
| F2RL1  | BSHqBKISg3u6xAXk64  | rs615986   | 3.72                         | 3.56             | -0.067               | 0.97                     | -21.65                        | 0.385                             | 7.787 | 0.203              | 7.114   | 7.676           | 7.799  | 7.893           | 8.498                   | Yes     |
| F2RL1  | BSHqBKISg3u6xAXk64  | rs458591   | 5.39                         | 5.15             | 0.1                  | 0.36                     | -21.48                        | 0.4025                            | 7.787 | 0.203              | 7.114   | 7.676           | 7.799  | 7.893           | 8.498                   | Yes     |
| F2RL1  | BSHqBKISg3u6xAXk64  | rs1030484  | 3.62                         | 3.46             | -0.065               | 0.64                     | -14.94                        | 0.435                             | 7.787 | 0.203              | 7.114   | 7.676           | 7.799  | 7.893           | 8.498                   | Yes     |
| F2RL1  | BSHqBKISg3u6xAXk64  | rs13177258 | 3.41                         | 3.26             | 0.062                | 0.38                     | -14.32                        | 0.4347                            | 7.787 | 0.203              | 7.114   | 7.676           | 7.799  | 7.893           | 8.498                   | Yes     |
| F2RL1  | BSHqBKISg3u6xAXk64  | rs6453251  | 6.04                         | 5.77             | 0.113                | 0.62                     | -7.7                          | 0.465                             | 7.787 | 0.203              | 7.114   | 7.676           | 7.799  | 7.893           | 8.498                   | Yes     |
| F2RL1  | BSHqBKISg3u6xAXk64  | rs4704366  | 3.36                         | 3.22             | -0.061               | 0.55                     | 6.08                          | 0.1875                            | 7.787 | 0.203              | 7.114   | 7.676           | 7.799  | 7.893           | 8.498                   | Yes     |
| F2RL1  | BSHqBKISg3u6xAXk64  | rs6883291  | 4.04                         | 3.86             | 0.074                | 0.65                     | 9.2                           | 0.3075                            | 7.787 | 0.203              | 7.114   | 7.676           | 7.799  | 7.893           | 8.498                   | Yes     |
| F2RL1  | BSHqBKISg3u6xAXk64  | rs7729082  | 3.32                         | 3.18             | -0.06                | 0.29                     | 10.88                         | 0.2325                            | 7.787 | 0.203              | 7.114   | 7.676           | 7.799  | 7.893           | 8.498                   | Yes     |
| F5     | r366ojx6gV9blbeDIQ  | rs2239854  | 16.06                        | 15.31            | 0.316                | 5.14                     | -29.91                        | 0.3166                            | 8.331 | 0.271              | 7.556   | 8.153           | 8.341  | 8.515           | 9.308                   | Yes     |
| F5     | r366ojx6gV9blbeDIQ  | rs6427202  | 7.73                         | 7.39             | -0.154               | 3.57                     | -26.89                        | 0.4125                            | 8.331 | 0.271              | 7.556   | 8.153           | 8.341  | 8.515           | 9.308                   | Yes     |
| F5     | r366ojx6gV9blbeDIQ  | rs1894702  | 16.12                        | 15.36            | -0.316               | 4.98                     | -24.88                        | 0.3166                            | 8.331 | 0.271              | 7.556   | 8.153           | 8.341  | 8.515           | 9.308                   | Yes     |
| F5     | r366ojx6gV9blbeDIQ  | rs3766119  | 16.24                        | 15.48            | 0.318                | 5.2                      | -24.74                        | 0.3175                            | 8.331 | 0.271              | 7.556   | 8.153           | 8.341  | 8.515           | 9.308                   | Yes     |
| F5     | r366ojx6gV9blbeDIQ  | rs6678795  | 12.57                        | 11.99            | 0.243                | 4.61                     | -22.45                        | 0.4975                            | 8.331 | 0.271              | 7.556   | 8.153           | 8.341  | 8.515           | 9.308                   | Yes     |
| F5     | r366ojx6gV9blbeDIQ  | rs3917854  | 16.64                        | 15.86            | -0.324               | 5.51                     | 3.31                          | 0.3175                            | 8.331 | 0.271              | 7.556   | 8.153           | 8.341  | 8.515           | 9.308                   | Yes     |
| F5     | r366ojx6gV9blbeDIQ  | rs6136     | 4.62                         | 4.42             | 0.089                | 2.24                     | 8.23                          | 0.095                             | 8.331 | 0.271              | 7.556   | 8.153           | 8.341  | 8.515           | 9.308                   | Yes     |
| F5     | r366ojx6gV9blbeDIQ  | rs2205895  | 14.63                        | 13.95            | -0.283               | 6                        | 16.92                         | 0.37                              | 8.331 | 0.271              | 7.556   | 8.153           | 8.341  | 8.515           | 9.308                   | Yes     |
| F5     | r366ojx6gV9blbeDIQ  | rs3917751  | 14.24                        | 13.58            | 0.277                | 6.16                     | 20.85                         | 0.3625                            | 8.331 | 0.271              | 7.556   | 8.153           | 8.341  | 8.515           | 9.308                   | Yes     |
| F5     | r366ojx6gV9blbeDIQ  | rs2076074  | 6.21                         | 5.93             | 0.123                | 1.49                     | 22.86                         | 0.245                             | 8.331 | 0.271              | 7.556   | 8.153           | 8.341  | 8.515           | 9.308                   | Yes     |
| FAAH   | T715r05qK6Jh44VeAl  | rs3863641  | 3.58                         | 3.43             | -0.069               | 1.83                     | -16.77                        | 0.4375                            | 7.718 | 0.314              | 7.19    | 7.498           | 7.644  | 7.844           | 8.973                   |         |
| FADS1  | NgUe6X3SXEku63fE6U  | rs174534   | 5.1                          | 4.87             | 0.095                | 4.83                     | -17.64                        | 0.352                             | 7.504 | 0.306              | 7.106   | 7.276           | 7.437  | 7.677           | 8.634                   |         |
| FADS1  | NgUe6X3SXEku63fE6U  | rs174537   | 5.11                         | 4.89             | 0.092                | 5.84                     | -14.42                        | 0.3475                            | 7.504 | 0.306              | 7.106   | 7.276           | 7.437  | 7.677           | 8.634                   |         |
| FADS1  | NgUe6X3SXEku63fE6U  | rs102275   | 4.58                         | 4.38             | -0.082               | 5.62                     | -9.3                          | 0.3543                            | 7.504 | 0.306              | 7.106   | 7.276           | 7.437  | 7.677           | 8.634                   |         |
| FADS1  | NgUe6X3SXEku63fE6U  | rs174546   | 5.1                          | 4.88             | 0.093                | 5.62                     | 2.73                          | 0.3467                            | 7.504 | 0.306              | 7.106   | 7.276           | 7.437  | 7.677           | 8.634                   |         |
| FADS1  | NgUe6X3SXEku63fE6U  | rs174556   | 5.99                         | 5.72             | 0.109                | 5.67                     | -3.67                         | 0.3075                            | 7.504 | 0.306              | 7.106   | 7.276           | 7.437  | 7.677           | 8.634                   |         |
| FADS1  | NgUe6X3SXEku63fE6U  | rs968567   | 7.78                         | 7.43             | 0.141                | 4.88                     | 11.25                         | 0.1975                            | 7.504 | 0.306              | 7.106   | 7.276           | 7.437  | 7.677           | 8.634                   |         |
| FADS1  | NgUe6X3SXEku63fE6U  | rs1535     | 4.44                         | 4.43             | 0.083                | 5.71                     | 13.66                         | 0.3525                            | 7.504 | 0.306              | 7.106   | 7.276           | 7.437  | 7.677           | 8.634                   |         |
| FADS1  | NgUe6X3SXEku63fE6U  | rs174576   | 4.78                         | 4.57             | -0.085               | 5.73                     | 19.2                          | 0.3575                            | 7.504 | 0.306              | 7.106   | 7.276           | 7.437  | 7.677           | 8.634                   |         |
| FADS1  | NgUe6X3SXEku63fE6U  | rs174579   | 4.8                          | 4.59             | 0.086                | 4.21                     | 21.3                          | 0.2475                            | 7.504 | 0.306              | 7.106   | 7.276           | 7.437  | 7.677           | 8.634                   |         |
| FADS2  | 3l9KoKkpFBB0g6qf2o  | rs174534   | 6.47                         | 6.18             | 0.131                | 3.17                     | -46.26                        | 0.352                             | 7.267 | 0.101              | 7.116   | 7.185           | 7.258  | 7.339           | 7.71                    |         |
| FADS2  | 3l9KoKkpFBB0g6qf2o  | rs174537   | 5.66                         | 5.41             | 0.111                | 3                        | -43.03                        | 0.3475                            | 7.267 | 0.101              | 7.116   | 7.185           | 7.258  | 7.339           | 7.71                    |         |
| FADS2  | 3l9KoKkpFBB0g6qf2o  | rs102275   | 4.9                          | 4.69             | -0.095               | 2.78                     | -37.91                        | 0.3543                            | 7.267 | 0.101              | 7.116   | 7.185           | 7.258  | 7.339           | 7.71                    |         |
| FADS2  | 3l9KoKkpFBB0g6qf2o  | rs174546   | 5.58                         | 5.34             | 0.11                 | 2.78                     | -25.88                        | 0.3467                            | 7.267 | 0.101              | 7.116   | 7.185           | 7.258  | 7.339           | 7.71                    |         |

| Symbol  | Lumi nuID           | SNP        | Population-based             | Population-based                      | % Variance Explained | Family-based                 | Distance from transcript (kb) | MAF    | Mean   | Transcript abundance (log2 scale) |         |                 |        |                 | SNP mapping under probe |         |
|---------|---------------------|------------|------------------------------|---------------------------------------|----------------------|------------------------------|-------------------------------|--------|--------|-----------------------------------|---------|-----------------|--------|-----------------|-------------------------|---------|
|         |                     |            | association p-value (-log10) | association p-value (-log10), GC adj. |                      | association p-value (-log10) |                               |        |        | Standard Deviation                | Minimum | 25th percentile | Median | 75th percentile |                         | Maximum |
| FADS2   | 3I9KoKkpFBB0g6qf2o  | rs174556   | 6.67                         | 6.37                                  | 0.131                | 2.39                         | -15.08                        | 0.3075 | 7.267  | 0.101                             | 7.116   | 7.185           | 7.258  | 7.339           | 7.71                    |         |
| FADS2   | 3I9KoKkpFBB0g6qf2o  | rs968567   | 16.52                        | 15.74                                 | 0.308                | 3.65                         | -0.15                         | 0.1975 | 7.267  | 0.101                             | 7.116   | 7.185           | 7.258  | 7.339           | 7.71                    |         |
| FADS2   | 3I9KoKkpFBB0g6qf2o  | rs1535     | 5.54                         | 5.30                                  | 0.108                | 3.02                         | 2.26                          | 0.3525 | 7.267  | 0.101                             | 7.116   | 7.185           | 7.258  | 7.339           | 7.71                    |         |
| FADS2   | 3I9KoKkpFBB0g6qf2o  | rs174576   | 5.67                         | 5.42                                  | -0.11                | 3.12                         | 7.8                           | 0.3575 | 7.267  | 0.101                             | 7.116   | 7.185           | 7.258  | 7.339           | 7.71                    |         |
| FADS2   | 3I9KoKkpFBB0g6qf2o  | rs174579   | 10.96                        | 10.46                                 | 0.215                | 4.21                         | 9.9                           | 0.2475 | 7.267  | 0.101                             | 7.116   | 7.185           | 7.258  | 7.339           | 7.71                    |         |
| FADS2   | 3I9KoKkpFBB0g6qf2o  | rs174611   | 5.61                         | 5.36                                  | -0.108               | 2.19                         | -6.94                         | 0.2925 | 7.267  | 0.101                             | 7.116   | 7.185           | 7.258  | 7.339           | 7.71                    |         |
| FADS2   | 3I9KoKkpFBB0g6qf2o  | rs174627   | 8.85                         | 8.45                                  | -0.173               | 1.98                         | 2.64                          | 0.1575 | 7.267  | 0.101                             | 7.116   | 7.185           | 7.258  | 7.339           | 7.71                    |         |
| FADS2   | 3I9KoKkpFBB0g6qf2o  | rs174469   | 3.44                         | 3.30                                  | 0.066                | 0.92                         | 32.62                         | 0.185  | 7.267  | 0.101                             | 7.116   | 7.185           | 7.258  | 7.339           | 7.71                    |         |
| FAHD1   | TZQKi_ha8CAGOI2Kek  | rs1742450  | 4.07                         | 3.89                                  | -0.08                | 0.99                         | -22.69                        | 0.2175 | 8.481  | 0.276                             | 7.53    | 8.316           | 8.465  | 8.672           | 9.387                   |         |
| FAHD1   | TZQKi_ha8CAGOI2Kek  | rs2575357  | 3.75                         | 3.59                                  | -0.073               | 1.01                         | -13.71                        | 0.205  | 8.481  | 0.276                             | 7.53    | 8.316           | 8.465  | 8.672           | 9.387                   |         |
| FAHD1   | TZQKi_ha8CAGOI2Kek  | rs12325218 | 4.5                          | 4.30                                  | -0.094               | 1.03                         | -3.19                         | 0.1375 | 8.481  | 0.276                             | 7.53    | 8.316           | 8.465  | 8.672           | 9.387                   |         |
| FAHD1   | TZQKi_ha8CAGOI2Kek  | rs12325282 | 4.5                          | 4.30                                  | -0.094               | 1.03                         | -3.16                         | 0.1375 | 8.481  | 0.276                             | 7.53    | 8.316           | 8.465  | 8.672           | 9.387                   |         |
| FAHD1   | TZQKi_ha8CAGOI2Kek  | rs9806945  | 6.47                         | 6.18                                  | 0.141                | 1.35                         | 4.79                          | 0.1301 | 8.481  | 0.276                             | 7.53    | 8.316           | 8.465  | 8.672           | 9.387                   |         |
| FAHD1   | TZQKi_ha8CAGOI2Kek  | rs1657117  | 4.5                          | 4.30                                  | 0.094                | 1.03                         | 13.48                         | 0.1375 | 8.481  | 0.276                             | 7.53    | 8.316           | 8.465  | 8.672           | 9.387                   |         |
| FAHD1   | TZQKi_ha8CAGOI2Kek  | rs1742429  | 4.5                          | 4.30                                  | -0.094               | 1.27                         | 14.83                         | 0.1375 | 8.481  | 0.276                             | 7.53    | 8.316           | 8.465  | 8.672           | 9.387                   |         |
| FAHD1   | TZQKi_ha8CAGOI2Kek  | rs173164   | 4.88                         | 4.66                                  | 0.102                | 1.36                         | 35.11                         | 0.135  | 8.481  | 0.276                             | 7.53    | 8.316           | 8.465  | 8.672           | 9.387                   |         |
| FAIM    | ommptr5mtrifZmriGc  | rs1673607  | 7.2                          | 6.88                                  | 0.151                | 0.23                         | -38.7                         | 0.45   | 7.182  | 0.054                             | 7.099   | 7.138           | 7.176  | 7.213           | 7.373                   |         |
| FAIM    | ommptr5mtrifZmriGc  | rs559313   | 7.2                          | 6.88                                  | -0.151               | 0.23                         | -29.94                        | 0.45   | 7.182  | 0.054                             | 7.099   | 7.138           | 7.176  | 7.213           | 7.373                   |         |
| FAIM    | ommptr5mtrifZmriGc  | rs503922   | 7.4                          | 7.06                                  | -0.158               | 0.26                         | -4.08                         | 0.4673 | 7.182  | 0.054                             | 7.099   | 7.138           | 7.176  | 7.213           | 7.373                   |         |
| FAIM    | ommptr5mtrifZmriGc  | rs811322   | 6.83                         | 6.53                                  | -0.142               | 0.16                         | 1.94                          | 0.4225 | 7.182  | 0.054                             | 7.099   | 7.138           | 7.176  | 7.213           | 7.373                   |         |
| FAIM    | ommptr5mtrifZmriGc  | rs12636246 | 6.36                         | 6.08                                  | -0.135               | 0.24                         | -5.63                         | 0.455  | 7.182  | 0.054                             | 7.099   | 7.138           | 7.176  | 7.213           | 7.373                   |         |
| FAIM    | ommptr5mtrifZmriGc  | rs9878820  | 4.62                         | 4.42                                  | 0.096                | 0.13                         | 33.2                          | 0.4697 | 7.182  | 0.054                             | 7.099   | 7.138           | 7.176  | 7.213           | 7.373                   |         |
| FAM100B | 3eeDuSp47pHiieH_1A  | rs71815    | 5.71                         | 5.46                                  | -0.103               | 1.45                         | 2.69                          | 0.3875 | 11.801 | 0.425                             | 10.563  | 11.511          | 11.799 | 12.069          | 12.886                  |         |
| FAM100B | 3eeDuSp47pHiieH_1A  | rs4789267  | 6.84                         | 6.53                                  | -0.123               | 0.85                         | 12.07                         | 0.445  | 11.801 | 0.425                             | 10.563  | 11.511          | 11.799 | 12.069          | 12.886                  |         |
| FAM100B | 3eeDuSp47pHiieH_1A  | rs8072620  | 5.83                         | 5.57                                  | 0.104                | 1.57                         | 15.88                         | 0.3    | 11.801 | 0.425                             | 10.563  | 11.511          | 11.799 | 12.069          | 12.886                  |         |
| FAM100B | 3eeDuSp47pHiieH_1A  | rs2279053  | 5.88                         | 5.62                                  | -0.104               | 1.57                         | 20.01                         | 0.3025 | 11.801 | 0.425                             | 10.563  | 11.511          | 11.799 | 12.069          | 12.886                  |         |
| FAM100B | 3eeDuSp47pHiieH_1A  | rs2279054  | 5.59                         | 5.34                                  | -0.099               | 1.49                         | 20.22                         | 0.2975 | 11.801 | 0.425                             | 10.563  | 11.511          | 11.799 | 12.069          | 12.886                  |         |
| FAM100B | 3eeDuSp47pHiieH_1A  | rs3803737  | 5.8                          | 5.55                                  | -0.104               | 1.52                         | 22.12                         | 0.3005 | 11.801 | 0.425                             | 10.563  | 11.511          | 11.799 | 12.069          | 12.886                  |         |
| FAM100B | 3eeDuSp47pHiieH_1A  | rs6501880  | 5.88                         | 5.62                                  | 0.104                | 1.57                         | 22.33                         | 0.3025 | 11.801 | 0.425                             | 10.563  | 11.511          | 11.799 | 12.069          | 12.886                  |         |
| FAM100B | 3eeDuSp47pHiieH_1A  | rs8074821  | 5.85                         | 5.60                                  | 0.104                | 1.57                         | 25.72                         | 0.3    | 11.801 | 0.425                             | 10.563  | 11.511          | 11.799 | 12.069          | 12.886                  |         |
| FAM113B | QH16i4VJvPXI10dc90  | rs214697   | 4.53                         | 4.33                                  | 0.09                 | 1.19                         | -3.86                         | 0.485  | 12.175 | 0.422                             | 10.699  | 11.947          | 12.194 | 12.344          | 13.417                  |         |
| FAM115A | 6d7pVS9qllI0g3F4kl  | rs11768025 | 4.84                         | 4.63                                  | -0.097               | 1.11                         | -23.19                        | 0.4325 | 7.164  | 0.064                             | 7.105   | 7.127           | 7.143  | 7.179           | 7.659                   |         |
| FAM115A | 6d7pVS9qllI0g3F4kl  | rs6980105  | 3.45                         | 3.31                                  | 0.066                | 0.33                         | -17.66                        | 0.3175 | 7.164  | 0.064                             | 7.105   | 7.127           | 7.143  | 7.179           | 7.659                   |         |
| FAM115A | 6d7pVS9qllI0g3F4kl  | rs6951299  | 3.69                         | 3.53                                  | 0.072                | 0.53                         | -13.09                        | 0.3138 | 7.164  | 0.064                             | 7.105   | 7.127           | 7.143  | 7.179           | 7.659                   |         |
| FAM118A | xxdKhSDW6ggQOheu9W8 | rs2742630  | 3.51                         | 3.36                                  | -0.067               | 2.04                         | -25.34                        | 0.2638 | 8.176  | 0.746                             | 7.367   | 7.686           | 7.905  | 8.282           | 10.571                  |         |
| FAM118A | xxdKhSDW6ggQOheu9W8 | rs104664   | 50.29                        | 47.87                                 | 0.684                | 3.7                          | 6.04                          | 0.12   | 8.176  | 0.746                             | 7.367   | 7.686           | 7.905  | 8.282           | 10.571                  |         |
| FAM118A | xxdKhSDW6ggQOheu9W8 | rs720682   | 4.67                         | 4.47                                  | -0.09                | 1.51                         | 12.04                         | 0.2725 | 8.176  | 0.746                             | 7.367   | 7.686           | 7.905  | 8.282           | 10.571                  |         |
| FAM118A | xxdKhSDW6ggQOheu9W8 | rs742013   | 6.12                         | 5.85                                  | 0.12                 | 1.44                         | -11.25                        | 0.2625 | 8.176  | 0.746                             | 7.367   | 7.686           | 7.905  | 8.282           | 10.571                  |         |
| FAM118A | xxdKhSDW6ggQOheu9W8 | rs6007594  | 6.73                         | 6.43                                  | 0.133                | 1.62                         | -8.27                         | 0.26   | 8.176  | 0.746                             | 7.367   | 7.686           | 7.905  | 8.282           | 10.571                  |         |
| FAM118A | xxdKhSDW6ggQOheu9W8 | rs136564   | 50.73                        | 48.29                                 | -0.691               | 3.62                         | 28.23                         | 0.1175 | 8.176  | 0.746                             | 7.367   | 7.686           | 7.905  | 8.282           | 10.571                  |         |
| FAM119B | T6PUVeX1yuF_hA92BU  | rs701008   | 39.9                         | 37.99                                 | -0.613               | 11.34                        | -48.74                        | 0.3775 | 8.812  | 0.382                             | 7.791   | 8.509           | 8.763  | 9.093           | 9.919                   |         |
| FAM119B | T6PUVeX1yuF_hA92BU  | rs10877011 | 39                           | 37.14                                 | -0.609               | 10.59                        | -41.39                        | 0.3625 | 8.812  | 0.382                             | 7.791   | 8.509           | 8.763  | 9.093           | 9.919                   |         |
| FAM119B | T6PUVeX1yuF_hA92BU  | rs12368653 | 17.55                        | 16.73                                 | 0.343                | 3.98                         | -33.13                        | 0.48   | 8.812  | 0.382                             | 7.791   | 8.509           | 8.763  | 9.093           | 9.919                   |         |
| FAM119B | T6PUVeX1yuF_hA92BU  | rs2069502  | 43.03                        | 40.96                                 | 0.645                | 11.39                        | -21.72                        | 0.3425 | 8.812  | 0.382                             | 7.791   | 8.509           | 8.763  | 9.093           | 9.919                   |         |
| FAM119B | T6PUVeX1yuF_hA92BU  | rs1048691  | 5.01                         | 4.79                                  | -0.102               | 2.28                         | -13.44                        | 0.1793 | 8.812  | 0.382                             | 7.791   | 8.509           | 8.763  | 9.093           | 9.919                   |         |
| FAM119B | T6PUVeX1yuF_hA92BU  | rs703842   | 43.79                        | 41.69                                 | 0.649                | 10.56                        | -3.64                         | 0.35   | 8.812  | 0.382                             | 7.791   | 8.509           | 8.763  | 9.093           | 9.919                   |         |
| FAM119B | T6PUVeX1yuF_hA92BU  | rs10877013 | 44.68                        | 42.54                                 | 0.659                | 11.64                        | -1.3                          | 0.345  | 8.812  | 0.382                             | 7.791   | 8.509           | 8.763  | 9.093           | 9.919                   |         |
| FAM119B | T6PUVeX1yuF_hA92BU  | rs2277326  | 16.17                        | 15.41                                 | 0.321                | 3.26                         | 26.09                         | 0.4369 | 8.812  | 0.382                             | 7.791   | 8.509           | 8.763  | 9.093           | 9.919                   |         |
| FAM119B | T6PUVeX1yuF_hA92BU  | rs4760332  | 27.89                        | 26.57                                 | -0.485               | 6.38                         | 46.35                         | 0.3525 | 8.812  | 0.382                             | 7.791   | 8.509           | 8.763  | 9.093           | 9.919                   |         |
| FAM120B | Wln.vp93VifuXj3ulQ  | rs1022614  | 6.02                         | 5.75                                  | 0.12                 | 1.44                         | -30.82                        | 0.0975 | 10.647 | 0.243                             | 9.857   | 10.499          | 10.682 | 10.817          | 11.2                    |         |
| FAM120B | Wln.vp93VifuXj3ulQ  | rs12189864 | 6.34                         | 6.06                                  | 0.126                | 2.12                         | -28.7                         | 0.2925 | 10.647 | 0.243                             | 9.857   | 10.499          | 10.682 | 10.817          | 11.2                    |         |
| FAM120B | Wln.vp93VifuXj3ulQ  | rs2144248  | 6.76                         | 6.46                                  | 0.135                | 1.68                         | -20.11                        | 0.305  | 10.647 | 0.243                             | 9.857   | 10.499          | 10.682 | 10.817          | 11.2                    |         |
| FAM120B | Wln.vp93VifuXj3ulQ  | rs9460129  | 6.71                         | 6.41                                  | -0.138               | 1.48                         | -18.02                        | 0.3036 | 10.647 | 0.243                             | 9.857   | 10.499          | 10.682 | 10.817          | 11.2                    |         |
| FAM120B | Wln.vp93VifuXj3ulQ  | rs9295405  | 4.59                         | 4.39                                  | -0.089               | 1.28                         | -10.02                        | 0.175  | 10.647 | 0.243                             | 9.857   | 10.499          | 10.682 | 10.817          | 11.2                    |         |
| FAM120B | Wln.vp93VifuXj3ulQ  | rs9459998  | 7.5                          | 7.16                                  | -0.15                | 1.42                         | -9.13                         | 0.1    | 10.647 | 0.243                             | 9.857   | 10.499          | 10.682 | 10.817          | 11.2                    |         |
| FAM120B | Wln.vp93VifuXj3ulQ  | rs727619   | 6.76                         | 6.46                                  | -0.135               | 1.68                         | -8.04                         | 0.305  | 10.647 | 0.243                             | 9.857   | 10.499          | 10.682 | 10.817          | 11.2                    |         |
| FAM120B | Wln.vp93VifuXj3ulQ  | rs9460139  | 7.6                          | 7.26                                  | -0.153               | 1.53                         | -2.06                         | 0.098  | 10.647 | 0.243                             | 9.857   | 10.499          | 10.682 | 10.817          | 11.2                    |         |
| FAM120B | Wln.vp93VifuXj3ulQ  | rs10081152 | 8.1                          | 7.74                                  | -0.163               | 1.74                         | 2.02                          | 0.105  | 10.647 | 0.243                             | 9.857   | 10.499          | 10.682 | 10.817          | 11.2                    |         |
| FAM120B | Wln.vp93VifuXj3ulQ  | rs760501   | 6.68                         | 6.38                                  | 0.134                | 2.61                         | 9.94                          | 0.225  | 10.647 | 0.243                             | 9.857   | 10.499          | 10.682 | 10.817          | 11.2                    |         |
| FAM131C | WolMFV1V9PH0dK6kX0  | rs10927902 | 3.45                         | 3.30                                  | -0.065               | 1.38                         | -4.95                         | 0.2225 | 7.122  | 0.015                             | 7.097   | 7.112           | 7.119  | 7.128           | 7.202                   |         |
| FAM154B | ZUkqpMNF69F31ruCMI  | rs8030250  | 3.83                         | 3.67                                  | 0.073                | 0.93                         | -35.61                        | 0.1975 | 7.204  | 0.178                             | 7.105   | 7.132           | 7.15   | 7.175           | 8.088                   | Yes     |
| FAM154B | ZUkqpMNF69F31ruCMI  | rs4778672  | 6.18                         | 5.90                                  | 0.122                | 1.72                         | -17.8                         | 0.275  | 7.204  | 0.178                             | 7.105   | 7.132           | 7.15   | 7.175           | 8.088                   | Yes     |

| Symbol   | Lumi nuID           | SNP        | Population-based association |                  | % Variance Explained | Family-based association |                               | Transcript abundance (log2 scale) |        |                    |         |                 |        |                 | SNP mapping under probe |         |
|----------|---------------------|------------|------------------------------|------------------|----------------------|--------------------------|-------------------------------|-----------------------------------|--------|--------------------|---------|-----------------|--------|-----------------|-------------------------|---------|
|          |                     |            | p-value (-log10)             | p-value (-log10) |                      | p-value (-log10)         | Distance from transcript (kb) | MAF                               | Mean   | Standard Deviation | Minimum | 25th percentile | Median | 75th percentile |                         | Maximum |
| FAM164A  | uWSULpnpAHvsrvX0rA  | rs12155808 | 5.83                         | 5.58             | 0.116                | 0.92                     | -25.3                         | 0.1181                            | 7.992  | 0.247              | 7.296   | 7.821           | 7.971  | 8.146           | 8.612                   |         |
| FAM164A  | uWSULpnpAHvsrvX0rA  | rs11781853 | 3.97                         | 3.80             | 0.075                | 0.82                     | -15.16                        | 0.0682                            | 7.992  | 0.247              | 7.296   | 7.821           | 7.971  | 8.146           | 8.612                   |         |
| FAM164A  | uWSULpnpAHvsrvX0rA  | rs1384804  | 14.73                        | 14.04            | -0.28                | 2.27                     | -6.11                         | 0.22                              | 7.992  | 0.247              | 7.296   | 7.821           | 7.971  | 8.146           | 8.612                   |         |
| FAM164A  | uWSULpnpAHvsrvX0rA  | rs10504680 | 6.44                         | 6.15             | 0.128                | 0.56                     | -2.33                         | 0.1075                            | 7.992  | 0.247              | 7.296   | 7.821           | 7.971  | 8.146           | 8.612                   |         |
| FAM164A  | uWSULpnpAHvsrvX0rA  | rs979564   | 10.75                        | 10.26            | -0.21                | 1.43                     | -2.17                         | 0.1475                            | 7.992  | 0.247              | 7.296   | 7.821           | 7.971  | 8.146           | 8.612                   |         |
| FAM164A  | uWSULpnpAHvsrvX0rA  | rs3736169  | 13.8                         | 13.16            | 0.265                | 2.35                     | 9.53                          | 0.2125                            | 7.992  | 0.247              | 7.296   | 7.821           | 7.971  | 8.146           | 8.612                   |         |
| FAM164A  | uWSULpnpAHvsrvX0rA  | rs7842142  | 13.8                         | 13.16            | -0.265               | 2.19                     | 15.41                         | 0.2125                            | 7.992  | 0.247              | 7.296   | 7.821           | 7.971  | 8.146           | 8.612                   |         |
| FAM164A  | uWSULpnpAHvsrvX0rA  | rs2369440  | 13.8                         | 13.16            | -0.265               | 2.19                     | -8.23                         | 0.2125                            | 7.992  | 0.247              | 7.296   | 7.821           | 7.971  | 8.146           | 8.612                   |         |
| FAM164A  | uWSULpnpAHvsrvX0rA  | rs1441438  | 13.8                         | 13.16            | 0.265                | 2.08                     | 11.83                         | 0.2125                            | 7.992  | 0.247              | 7.296   | 7.821           | 7.971  | 8.146           | 8.612                   |         |
| FAM164A  | uWSULpnpAHvsrvX0rA  | rs6993386  | 12.72                        | 12.13            | -0.251               | 3.49                     | 24.21                         | 0.2825                            | 7.992  | 0.247              | 7.296   | 7.821           | 7.971  | 8.146           | 8.612                   |         |
| FAM164A  | uWSULpnpAHvsrvX0rA  | rs1119642  | 3.5                          | 3.36             | 0.066                | 2.27                     | 34.55                         | 0.1683                            | 7.992  | 0.247              | 7.296   | 7.821           | 7.971  | 8.146           | 8.612                   |         |
| FAM164A  | uWSULpnpAHvsrvX0rA  | rs2717548  | 3.5                          | 3.36             | -0.066               | 2.44                     | 41.13                         | 0.1675                            | 7.992  | 0.247              | 7.296   | 7.821           | 7.971  | 8.146           | 8.612                   |         |
| FAM171A1 | 3IC5T_q0k12.QRLud0  | rs10906861 | 3.92                         | 3.75             | -0.076               | 3.17                     | -1.25                         | 0.3925                            | 9.324  | 0.328              | 8.211   | 9.152           | 9.311  | 9.531           | 10.107                  | Yes     |
| FAM19A1  | 0ij3wqJR1FOc8ld6SI  | rs6800897  | 3.96                         | 3.79             | 0.074                | 1.93                     | 13.03                         | 0.3625                            | 7.734  | 0.263              | 7.177   | 7.527           | 7.735  | 7.918           | 8.519                   |         |
| FAM19A1  | 0ij3wqJR1FOc8ld6SI  | rs6548962  | 16.66                        | 15.88            | -0.3                 | 4.84                     | 68.34                         | 0.485                             | 7.734  | 0.263              | 7.177   | 7.527           | 7.735  | 7.918           | 8.519                   |         |
| FAM19A1  | 0ij3wqJR1FOc8ld6SI  | rs7610023  | 13.69                        | 13.06            | 0.252                | 3.38                     | 70.28                         | 0.435                             | 7.734  | 0.263              | 7.177   | 7.527           | 7.735  | 7.918           | 8.519                   |         |
| FAM19A1  | 0ij3wqJR1FOc8ld6SI  | rs6548984  | 15.9                         | 15.16            | -0.288               | 4.73                     | 95.82                         | 0.4875                            | 7.734  | 0.263              | 7.177   | 7.527           | 7.735  | 7.918           | 8.519                   |         |
| FAM19A1  | 0ij3wqJR1FOc8ld6SI  | rs9309968  | 7.59                         | 7.25             | 0.144                | 2.95                     | 120.96                        | 0.14                              | 7.734  | 0.263              | 7.177   | 7.527           | 7.735  | 7.918           | 8.519                   |         |
| FAM19A1  | 0ij3wqJR1FOc8ld6SI  | rs6768632  | 21.79                        | 20.76            | 0.375                | 6.62                     | 131.56                        | 0.4375                            | 7.734  | 0.263              | 7.177   | 7.527           | 7.735  | 7.918           | 8.519                   |         |
| FAM19A1  | 0ij3wqJR1FOc8ld6SI  | rs6776172  | 15.38                        | 14.66            | 0.284                | 4.82                     | 134.46                        | 0.2425                            | 7.734  | 0.263              | 7.177   | 7.527           | 7.735  | 7.918           | 8.519                   |         |
| FAM19A2  | ins1QuR7X3teju9erU  | rs7313479  | 3.33                         | 3.19             | 0.061                | 2.32                     | 36.55                         | 0.3712                            | 7.178  | 0.065              | 7.102   | 7.131           | 7.159  | 7.205           | 7.436                   |         |
| FAM20B   | NV9D10LerrhCsqnKx4  | rs3813638  | 4.53                         | 4.33             | 0.084                | 1.01                     | -0.43                         | 0.2925                            | 9.738  | 0.198              | 9.039   | 9.632           | 9.745  | 9.855           | 10.18                   |         |
| FAM20B   | NV9D10LerrhCsqnKx4  | rs6425512  | 4.71                         | 4.51             | -0.088               | 1.13                     | 5.07                          | 0.29                              | 9.738  | 0.198              | 9.039   | 9.632           | 9.745  | 9.855           | 10.18                   |         |
| FAM20B   | NV9D10LerrhCsqnKx4  | rs1220     | 3.48                         | 3.34             | -0.063               | 0.63                     | -0.2                          | 0.39                              | 9.738  | 0.198              | 9.039   | 9.632           | 9.745  | 9.855           | 10.18                   |         |
| FAM20B   | NV9D10LerrhCsqnKx4  | rs3210839  | 3.58                         | 3.43             | 0.065                | 0.22                     | 23.73                         | 0.3325                            | 9.738  | 0.198              | 9.039   | 9.632           | 9.745  | 9.855           | 10.18                   |         |
| FAM26F   | fo3gp0tkrvqejfJL4   | rs3777992  | 3.64                         | 3.49             | -0.07                | 2.76                     | -42.21                        | 0.27                              | 9.397  | 0.977              | 7.124   | 8.623           | 9.343  | 10.185          | 11.837                  |         |
| FAM26F   | fo3gp0tkrvqejfJL4   | rs508521   | 3.64                         | 3.49             | 0.07                 | 3                        | -35.31                        | 0.27                              | 9.397  | 0.977              | 7.124   | 8.623           | 9.343  | 10.185          | 11.837                  |         |
| FAM26F   | fo3gp0tkrvqejfJL4   | rs483981   | 4.5                          | 4.30             | -0.089               | 2.86                     | -19.48                        | 0.1925                            | 9.397  | 0.977              | 7.124   | 8.623           | 9.343  | 10.185          | 11.837                  |         |
| FAM26F   | fo3gp0tkrvqejfJL4   | rs2637669  | 3.53                         | 3.38             | -0.066               | 1.91                     | 20.11                         | 0.3225                            | 9.397  | 0.977              | 7.124   | 8.623           | 9.343  | 10.185          | 11.837                  |         |
| FAM38A   | 07jk11axI4leOee0IA  | rs2968482  | 3.75                         | 3.59             | -0.07                | 0.14                     | 41.77                         | 0.295                             | 10.971 | 0.483              | 9.816   | 10.623          | 10.997 | 11.32           | 12.013                  |         |
| FAM43A   | uske9697_RILqilMCI  | rs1773225  | 3.46                         | 3.31             | -0.067               | 0.52                     | -3.04                         | 0.4375                            | 8.479  | 0.478              | 7.322   | 8.138           | 8.543  | 8.846           | 9.787                   |         |
| FAM43A   | uske9697_RILqilMCI  | rs2126305  | 3.73                         | 3.57             | -0.07                | 2.11                     | 30.43                         | 0.135                             | 8.479  | 0.478              | 7.322   | 8.138           | 8.543  | 8.846           | 9.787                   |         |
| FAM45A   | cB9cSgUAUIAp9SQfY4  | rs4751691  | 4.6                          | 4.40             | 0.091                | 2.44                     | -13.45                        | 0.44                              | 9.675  | 0.403              | 7.813   | 9.45            | 9.757  | 9.955           | 10.562                  |         |
| FAM50B   | 6KKRP.xeuvOJO_h_qIE | rs4959877  | 3.86                         | 3.70             | 0.08                 | 1.88                     | 1.14                          | 0.1332                            | 8.777  | 0.231              | 8.068   | 8.607           | 8.813  | 8.927           | 9.341                   |         |
| FAM50B   | 6KKRP.xeuvOJO_h_qIE | rs11242890 | 3.9                          | 3.73             | -0.077               | 1.6                      | 33.83                         | 0.2225                            | 8.777  | 0.231              | 8.068   | 8.607           | 8.813  | 8.927           | 9.341                   |         |
| FAM76B   | 9X76IBxAIC_1219V8k  | rs11021309 | 3.71                         | 3.55             | 0.073                | 0.93                     | -0.22                         | 0.4015                            | 9.105  | 0.416              | 7.703   | 8.851           | 9.142  | 9.4             | 10.031                  |         |
| FAM76B   | 9X76IBxAIC_1219V8k  | rs1150360  | 4.65                         | 4.45             | -0.094               | 1.55                     | 9.94                          | 0.4897                            | 9.105  | 0.416              | 7.703   | 8.851           | 9.142  | 9.4             | 10.031                  |         |
| FAM76B   | 9X76IBxAIC_1219V8k  | rs1727165  | 4.28                         | 4.10             | -0.084               | 1.23                     | -1.13                         | 0.4874                            | 9.105  | 0.416              | 7.703   | 8.851           | 9.142  | 9.4             | 10.031                  |         |
| FAM76B   | 9X76IBxAIC_1219V8k  | rs3748256  | 4.56                         | 4.37             | -0.091               | 0.79                     | -0.83                         | 0.38                              | 9.105  | 0.416              | 7.703   | 8.851           | 9.142  | 9.4             | 10.031                  |         |
| FAM76B   | 9X76IBxAIC_1219V8k  | rs568668   | 4.56                         | 4.37             | 0.091                | 0.72                     | 5.43                          | 0.38                              | 9.105  | 0.416              | 7.703   | 8.851           | 9.142  | 9.4             | 10.031                  |         |
| FAM76B   | 9X76IBxAIC_1219V8k  | rs1784135  | 4.56                         | 4.37             | 0.091                | 0.72                     | 8.97                          | 0.38                              | 9.105  | 0.416              | 7.703   | 8.851           | 9.142  | 9.4             | 10.031                  |         |
| FAM76B   | 9X76IBxAIC_1219V8k  | rs3017756  | 4.06                         | 3.89             | 0.08                 | 1.04                     | 14.58                         | 0.4025                            | 9.105  | 0.416              | 7.703   | 8.851           | 9.142  | 9.4             | 10.031                  |         |
| FARP2    | 36XikJHoAileUxFebE  | rs12694997 | 3.86                         | 3.69             | -0.074               | 0.73                     | -32.73                        | 0.2333                            | 7.274  | 0.123              | 7.11    | 7.184           | 7.244  | 7.335           | 7.742                   | Yes     |
| FARP2    | 36XikJHoAileUxFebE  | rs1532788  | 3.84                         | 3.68             | 0.074                | 1.33                     | 34.48                         | 0.2449                            | 7.274  | 0.123              | 7.11    | 7.184           | 7.244  | 7.335           | 7.742                   | Yes     |
| FARP2    | 36XikJHoAileUxFebE  | rs10192057 | 3.79                         | 3.63             | 0.071                | 1.4                      | -46.27                        | 0.23                              | 7.274  | 0.123              | 7.11    | 7.184           | 7.244  | 7.335           | 7.742                   | Yes     |
| FARP2    | 36XikJHoAileUxFebE  | rs4675814  | 3.54                         | 3.39             | -0.067               | 1.14                     | -45.79                        | 0.2375                            | 7.274  | 0.123              | 7.11    | 7.184           | 7.244  | 7.335           | 7.742                   | Yes     |
| FARP2    | 36XikJHoAileUxFebE  | rs17387035 | 3.65                         | 3.50             | -0.069               | 0.85                     | -40.25                        | 0.215                             | 7.274  | 0.123              | 7.11    | 7.184           | 7.244  | 7.335           | 7.742                   | Yes     |
| FARP2    | 36XikJHoAileUxFebE  | rs4675812  | 3.63                         | 3.47             | -0.068               | 0.72                     | -38.58                        | 0.4475                            | 7.274  | 0.123              | 7.11    | 7.184           | 7.244  | 7.335           | 7.742                   | Yes     |
| FASTKD1  | oYDL6NCnlFKp4Cj5.o  | rs12612150 | 5.32                         | 5.08             | -0.102               | 1.01                     | -46.02                        | 0.1307                            | 8.289  | 0.196              | 7.726   | 8.16            | 8.266  | 8.405           | 9.391                   | Yes     |
| FASTKD1  | oYDL6NCnlFKp4Cj5.o  | rs12465387 | 5.54                         | 5.30             | -0.112               | 1.24                     | -36.2                         | 0.0682                            | 8.289  | 0.196              | 7.726   | 8.16            | 8.266  | 8.405           | 9.391                   | Yes     |
| FASTKD1  | oYDL6NCnlFKp4Cj5.o  | rs12619026 | 5.84                         | 5.58             | 0.114                | 1.15                     | -31.48                        | 0.1667                            | 8.289  | 0.196              | 7.726   | 8.16            | 8.266  | 8.405           | 9.391                   | Yes     |
| FASTKD1  | oYDL6NCnlFKp4Cj5.o  | rs12052238 | 9.15                         | 8.74             | -0.178               | 1.18                     | -14.88                        | 0.0875                            | 8.289  | 0.196              | 7.726   | 8.16            | 8.266  | 8.405           | 9.391                   | Yes     |
| FASTKD1  | oYDL6NCnlFKp4Cj5.o  | rs2353196  | 4.03                         | 3.86             | -0.076               | 0.77                     | 27.05                         | 0.295                             | 8.289  | 0.196              | 7.726   | 8.16            | 8.266  | 8.405           | 9.391                   | Yes     |
| FBLN5    | ciOImESG8pP154G.VY  | rs7143288  | 4.31                         | 4.13             | 0.082                | 2.06                     | 2.12                          | 0.4375                            | 8.477  | 0.445              | 7.182   | 8.162           | 8.513  | 8.8             | 9.616                   | Yes     |
| FBLN5    | ciOImESG8pP154G.VY  | rs2284337  | 5.6                          | 5.35             | -0.112               | 0.38                     | 4.97                          | 0.2625                            | 8.477  | 0.445              | 7.182   | 8.162           | 8.513  | 8.8             | 9.616                   | Yes     |
| FBLN5    | ciOImESG8pP154G.VY  | rs2284339  | 17.07                        | 16.27            | -0.32                | 3.25                     | 5.15                          | 0.465                             | 8.477  | 0.445              | 7.182   | 8.162           | 8.513  | 8.8             | 9.616                   | Yes     |
| FBLN5    | ciOImESG8pP154G.VY  | rs2430343  | 5.05                         | 4.83             | 0.099                | 0.45                     | 9.91                          | 0.3075                            | 8.477  | 0.445              | 7.182   | 8.162           | 8.513  | 8.8             | 9.616                   | Yes     |
| FBLN5    | ciOImESG8pP154G.VY  | rs2430353  | 4.14                         | 3.96             | -0.08                | 2.08                     | 19.36                         | 0.23                              | 8.477  | 0.445              | 7.182   | 8.162           | 8.513  | 8.8             | 9.616                   | Yes     |
| FBLN5    | ciOImESG8pP154G.VY  | rs2254320  | 6.62                         | 6.32             | -0.135               | 1.57                     | 35.39                         | 0.4275                            | 8.477  | 0.445              | 7.182   | 8.162           | 8.513  | 8.8             | 9.616                   | Yes     |
| FBLN5    | ciOImESG8pP154G.VY  | rs1861087  | 3.45                         | 3.31             | 0.065                | 1.74                     | 35.6                          | 0.165                             | 8.477  | 0.445              | 7.182   | 8.162           | 8.513  | 8.8             | 9.616                   | Yes     |
| FBLN5    | ciOImESG8pP154G.VY  | rs2160080  | 3.58                         | 3.43             | -0.069               | 2.11                     | 38.73                         | 0.1925                            | 8.477  | 0.445              | 7.182   | 8.162           | 8.513  | 8.8             | 9.616                   | Yes     |
| FBLN5    | ciOImESG8pP154G.VY  | rs12589592 | 4.09                         | 3.92             | 0.078                | 0.48                     | -36.23                        | 0.3475                            | 8.477  | 0.445              | 7.182   | 8.162           | 8.513  | 8.8             | 9.616                   | Yes     |

| Symbol | Lumi nuID           | SNP        | Population-based             | Population-based                      | % Variance Explained | Family-based                 | Distance from transcript (kb) | MAF    | Mean   | Transcript abundance (log2 scale) |         |                 |        |                 | SNP mapping under probe |         |
|--------|---------------------|------------|------------------------------|---------------------------------------|----------------------|------------------------------|-------------------------------|--------|--------|-----------------------------------|---------|-----------------|--------|-----------------|-------------------------|---------|
|        |                     |            | association p-value (-log10) | association p-value (-log10), GC adj. |                      | association p-value (-log10) |                               |        |        | Standard Deviation                | Minimum | 25th percentile | Median | 75th percentile |                         | Maximum |
| FBLN5  | ciOImESG8pP154G.VY  | rs2284340  | 6.69                         | 6.39                                  | -0.137               | 0.68                         | -24.99                        | 0.45   | 8.477  | 0.445                             | 7.182   | 8.162           | 8.513  | 8.8             | 9.616                   | Yes     |
| FBLN5  | ciOImESG8pP154G.VY  | rs2498852  | 5.67                         | 5.42                                  | 0.113                | 1.44                         | 2.33                          | 0.4774 | 8.477  | 0.445                             | 7.182   | 8.162           | 8.513  | 8.8             | 9.616                   | Yes     |
| FBLN5  | ciOImESG8pP154G.VY  | rs1051340  | 3.92                         | 3.76                                  | 0.076                | 0.45                         | 27.03                         | 0.3036 | 8.477  | 0.445                             | 7.182   | 8.162           | 8.513  | 8.8             | 9.616                   | Yes     |
| FBLN5  | ciOImESG8pP154G.VY  | rs8020861  | 4.92                         | 4.70                                  | -0.097               | 0.61                         | 44.03                         | 0.4475 | 8.477  | 0.445                             | 7.182   | 8.162           | 8.513  | 8.8             | 9.616                   | Yes     |
| FBXL14 | 03o4XlyS.VTiMig7cY  | rs2107525  | 3.9                          | 3.74                                  | 0.075                | 1.42                         | 1.96                          | 0.36   | 7.368  | 0.108                             | 7.136   | 7.303           | 7.364  | 7.426           | 7.939                   |         |
| FBXL5  | oBNOlul5RUGKRMcuU   | rs7685083  | 4.01                         | 3.84                                  | -0.076               | 1.4                          | 4.62                          | 0.3525 | 8.554  | 0.319                             | 7.693   | 8.346           | 8.538  | 8.749           | 9.98                    |         |
| FBXL5  | oBNOlul5RUGKRMcuU   | rs4235379  | 4.16                         | 3.98                                  | 0.079                | 1.46                         | 2.27                          | 0.355  | 8.554  | 0.319                             | 7.693   | 8.346           | 8.538  | 8.749           | 9.98                    |         |
| FBXO2  | uy1Mm10X1UJRE111TU  | rs909934   | 8.63                         | 8.24                                  | 0.169                | 1.35                         | -1.18                         | 0.202  | 7.587  | 0.216                             | 7.153   | 7.443           | 7.56   | 7.689           | 8.228                   |         |
| FBXO2  | uy1Mm10X1UJRE111TU  | rs2336031  | 6.21                         | 5.93                                  | -0.122               | 1.39                         | 30.72                         | 0.2375 | 7.587  | 0.216                             | 7.153   | 7.443           | 7.56   | 7.689           | 8.228                   |         |
| FBXO27 | QrD1eJUFeNdChew_7o  | rs649150   | 3.64                         | 3.49                                  | -0.073               | 1.98                         | -33.18                        | 0.34   | 7.158  | 0.038                             | 7.105   | 7.132           | 7.148  | 7.173           | 7.307                   |         |
| FBXO27 | QrD1eJUFeNdChew_7o  | rs650027   | 5.25                         | 5.02                                  | 0.107                | 1.48                         | -32.98                        | 0.485  | 7.158  | 0.038                             | 7.105   | 7.132           | 7.148  | 7.173           | 7.307                   |         |
| FBXO27 | QrD1eJUFeNdChew_7o  | rs10417436 | 5.76                         | 5.51                                  | 0.119                | 1.63                         | 5.73                          | 0.4975 | 7.158  | 0.038                             | 7.105   | 7.132           | 7.148  | 7.173           | 7.307                   |         |
| FBXO27 | QrD1eJUFeNdChew_7o  | rs4803193  | 5.68                         | 5.43                                  | 0.12                 | 1.36                         | 12.49                         | 0.4974 | 7.158  | 0.038                             | 7.105   | 7.132           | 7.148  | 7.173           | 7.307                   |         |
| FBXO27 | QrD1eJUFeNdChew_7o  | rs523943   | 3.9                          | 3.73                                  | -0.078               | 1.61                         | 12.52                         | 0.2312 | 7.158  | 0.038                             | 7.105   | 7.132           | 7.148  | 7.173           | 7.307                   |         |
| FBXO27 | QrD1eJUFeNdChew_7o  | rs1627631  | 4.03                         | 3.86                                  | -0.08                | 2.13                         | 14.26                         | 0.235  | 7.158  | 0.038                             | 7.105   | 7.132           | 7.148  | 7.173           | 7.307                   |         |
| FBXO27 | QrD1eJUFeNdChew_7o  | rs7250431  | 5.76                         | 5.51                                  | -0.119               | 1.63                         | 15.39                         | 0.4975 | 7.158  | 0.038                             | 7.105   | 7.132           | 7.148  | 7.173           | 7.307                   |         |
| FBXO27 | QrD1eJUFeNdChew_7o  | rs7259197  | 5.1                          | 4.88                                  | -0.106               | 0.84                         | 18.89                         | 0.4625 | 7.158  | 0.038                             | 7.105   | 7.132           | 7.148  | 7.173           | 7.307                   |         |
| FBXO27 | QrD1eJUFeNdChew_7o  | rs930100   | 4.41                         | 4.41                                  | 0.093                | 0.7                          | 21.04                         | 0.33   | 7.158  | 0.038                             | 7.105   | 7.132           | 7.148  | 7.173           | 7.307                   |         |
| FBXO28 | 6k7fke9BdeLrZ.BBdQ  | rs2896987  | 3.55                         | 3.40                                  | 0.065                | 2.41                         | -28.5                         | 0.2725 | 8.808  | 0.257                             | 7.782   | 8.65            | 8.825  | 8.996           | 9.352                   |         |
| FBXO28 | 6k7fke9BdeLrZ.BBdQ  | rs1573185  | 3.7                          | 3.54                                  | 0.068                | 2.41                         | -18.75                        | 0.275  | 8.808  | 0.257                             | 7.782   | 8.65            | 8.825  | 8.996           | 9.352                   |         |
| FBXO28 | 6k7fke9BdeLrZ.BBdQ  | rs10916290 | 3.84                         | 3.67                                  | 0.07                 | 2.53                         | -17.44                        | 0.2675 | 8.808  | 0.257                             | 7.782   | 8.65            | 8.825  | 8.996           | 9.352                   |         |
| FBXO28 | 6k7fke9BdeLrZ.BBdQ  | rs2172358  | 5.26                         | 5.03                                  | 0.101                | 3.46                         | -19.32                        | 0.2563 | 8.808  | 0.257                             | 7.782   | 8.65            | 8.825  | 8.996           | 9.352                   |         |
| FBXO28 | 6k7fke9BdeLrZ.BBdQ  | rs1826421  | 6.29                         | 6.01                                  | -0.122               | 5.34                         | -7.8                          | 0.415  | 8.808  | 0.257                             | 7.782   | 8.65            | 8.825  | 8.996           | 9.352                   |         |
| FBXO28 | 6k7fke9BdeLrZ.BBdQ  | rs10799505 | 6.28                         | 6.00                                  | 0.122                | 5.65                         | 3.78                          | 0.4066 | 8.808  | 0.257                             | 7.782   | 8.65            | 8.825  | 8.996           | 9.352                   |         |
| FBXO28 | 6k7fke9BdeLrZ.BBdQ  | rs2139155  | 3.92                         | 3.75                                  | 0.074                | 4.44                         | 48.8                          | 0.4875 | 8.808  | 0.257                             | 7.782   | 8.65            | 8.825  | 8.996           | 9.352                   |         |
| FBXO4  | 0YRDgrjJQJoJaxLuPU  | rs10064298 | 4.97                         | 4.75                                  | 0.099                | 2.34                         | -23.47                        | 0.0875 | 7.497  | 0.382                             | 7.1     | 7.188           | 7.368  | 7.7             | 8.643                   |         |
| FBXO4  | 0YRDgrjJQJoJaxLuPU  | rs2231910  | 4.97                         | 4.75                                  | -0.099               | 2.22                         | -0.41                         | 0.0875 | 7.497  | 0.382                             | 7.1     | 7.188           | 7.368  | 7.7             | 8.643                   |         |
| FBXO4  | 0YRDgrjJQJoJaxLuPU  | rs10052226 | 4.88                         | 4.67                                  | -0.098               | 1.62                         | 14.07                         | 0.0825 | 7.497  | 0.382                             | 7.1     | 7.188           | 7.368  | 7.7             | 8.643                   |         |
| FBXO4  | 0YRDgrjJQJoJaxLuPU  | rs13436920 | 4.88                         | 4.67                                  | 0.098                | 1.62                         | 24.88                         | 0.0825 | 7.497  | 0.382                             | 7.1     | 7.188           | 7.368  | 7.7             | 8.643                   |         |
| FBXO4  | 0YRDgrjJQJoJaxLuPU  | rs2113053  | 3.71                         | 3.55                                  | -0.071               | 1.79                         | 38.24                         | 0.0905 | 7.497  | 0.382                             | 7.1     | 7.188           | 7.368  | 7.7             | 8.643                   |         |
| FBXO4  | 0YRDgrjJQJoJaxLuPU  | rs10076886 | 4.03                         | 3.86                                  | 0.078                | 1.45                         | 46.81                         | 0.0875 | 7.497  | 0.382                             | 7.1     | 7.188           | 7.368  | 7.7             | 8.643                   |         |
| FBXO7  | EXiktXnuReqsS9wxWM  | rs760657   | 3.72                         | 3.56                                  | 0.073                | 0.85                         | -13.42                        | 0.17   | 8.14   | 0.351                             | 7.385   | 7.887           | 8.146  | 8.367           | 9.282                   |         |
| FBXW8  | N3SoZdTVadVvwkyCMdg | rs4767470  | 4.06                         | 3.88                                  | -0.08                | 1.31                         | -19.68                        | 0.0825 | 7.233  | 0.085                             | 7.101   | 7.18            | 7.215  | 7.268           | 7.809                   |         |
| FCRL3  | KV7kDSL04uggquLXB4  | rs12123141 | 7.43                         | 7.09                                  | 0.144                | 2.45                         | -20.35                        | 0.065  | 9.757  | 0.471                             | 8.032   | 9.455           | 9.742  | 10.046          | 11.199                  | Yes     |
| FCRL3  | 67unrLpPnjv_uzOezU  | rs7522061  | 8.78                         | 8.39                                  | -0.182               | 4.04                         | -2.26                         | 0.4925 | 7.76   | 0.253                             | 7.269   | 7.566           | 7.723  | 7.907           | 8.86                    |         |
| FCRL3  | KV7kDSL04uggquLXB4  | rs7522061  | 8.53                         | 8.14                                  | -0.179               | 3.09                         | -2.26                         | 0.4925 | 9.757  | 0.471                             | 8.032   | 9.455           | 9.742  | 10.046          | 11.199                  | Yes     |
| FCRL3  | ZUclXxUi6VEoBJeRT8  | rs7522061  | 6.08                         | 5.81                                  | -0.131               | 1.24                         | -2.26                         | 0.4925 | 7.72   | 0.216                             | 7.327   | 7.569           | 7.683  | 7.84            | 8.494                   | Yes     |
| FCRL3  | 67unrLpPnjv_uzOezU  | rs3761959  | 9.4                          | 8.97                                  | 0.193                | 4.8                          | -1.37                         | 0.4625 | 7.76   | 0.253                             | 7.269   | 7.566           | 7.723  | 7.907           | 8.86                    |         |
| FCRL3  | KV7kDSL04uggquLXB4  | rs3761959  | 9.34                         | 8.92                                  | 0.194                | 4.43                         | -1.37                         | 0.4625 | 9.757  | 0.471                             | 8.032   | 9.455           | 9.742  | 10.046          | 11.199                  | Yes     |
| FCRL3  | ZUclXxUi6VEoBJeRT8  | rs3761959  | 6.07                         | 5.80                                  | 0.129                | 1.01                         | -1.37                         | 0.4625 | 7.72   | 0.216                             | 7.327   | 7.569           | 7.683  | 7.84            | 8.494                   | Yes     |
| FCRL3  | 67unrLpPnjv_uzOezU  | rs17727339 | 4                            | 3.83                                  | -0.075               | 1.53                         | 9.47                          | 0.2136 | 7.76   | 0.253                             | 7.269   | 7.566           | 7.723  | 7.907           | 8.86                    |         |
| FCRL3  | 67unrLpPnjv_uzOezU  | rs1999793  | 6.82                         | 6.52                                  | -0.132               | 2.17                         | 24.77                         | 0.2236 | 7.76   | 0.253                             | 7.269   | 7.566           | 7.723  | 7.907           | 8.86                    |         |
| FCRL3  | ZUclXxUi6VEoBJeRT8  | rs1999793  | 5.94                         | 5.68                                  | -0.12                | 1.83                         | 24.77                         | 0.2236 | 7.72   | 0.216                             | 7.327   | 7.569           | 7.683  | 7.84            | 8.494                   | Yes     |
| FCRL3  | KV7kDSL04uggquLXB4  | rs1999793  | 5.24                         | 5.01                                  | -0.102               | 2.83                         | 24.77                         | 0.2236 | 9.757  | 0.471                             | 8.032   | 9.455           | 9.742  | 10.046          | 11.199                  | Yes     |
| FCRL3  | ZUclXxUi6VEoBJeRT8  | rs3818813  | 4.24                         | 4.06                                  | -0.083               | 1.43                         | 47.68                         | 0.185  | 7.72   | 0.216                             | 7.327   | 7.569           | 7.683  | 7.84            | 8.494                   | Yes     |
| FCRL3  | 67unrLpPnjv_uzOezU  | rs3818813  | 4.16                         | 3.98                                  | -0.078               | 1.39                         | 47.68                         | 0.185  | 7.76   | 0.253                             | 7.269   | 7.566           | 7.723  | 7.907           | 8.86                    |         |
| FCRL5  | oKnz310LCqgdf6nqE   | rs1984492  | 3.38                         | 3.24                                  | 0.063                | 0.92                         | -4.28                         | 0.2386 | 7.314  | 0.196                             | 7.101   | 7.181           | 7.257  | 7.39            | 8.261                   |         |
| FCRL5  | oKnz310LCqgdf6nqE   | rs4111873  | 3.42                         | 3.27                                  | -0.063               | 0.91                         | 11.72                         | 0.2375 | 7.314  | 0.196                             | 7.101   | 7.181           | 7.257  | 7.39            | 8.261                   |         |
| FCRL5  | oKnz310LCqgdf6nqE   | rs10489671 | 3.42                         | 3.27                                  | -0.063               | 0.91                         | 16.41                         | 0.2375 | 7.314  | 0.196                             | 7.101   | 7.181           | 7.257  | 7.39            | 8.261                   |         |
| FCRL5  | oKnz310LCqgdf6nqE   | rs1412676  | 3.42                         | 3.27                                  | 0.063                | 0.91                         | 17.01                         | 0.2375 | 7.314  | 0.196                             | 7.101   | 7.181           | 7.257  | 7.39            | 8.261                   |         |
| FDFT1  | 0Z7unqF.KAuA5K4ggU  | rs1296028  | 3.69                         | 3.53                                  | -0.07                | 2.39                         | 1.93                          | 0.2425 | 9.775  | 0.33                              | 8.483   | 9.566           | 9.762  | 10.008          | 10.469                  | Yes     |
| FDFT1  | 0Z7unqF.KAuA5K4ggU  | rs4839     | 3.84                         | 3.68                                  | 0.073                | 2.49                         | 5.12                          | 0.24   | 9.775  | 0.33                              | 8.483   | 9.566           | 9.762  | 10.008          | 10.469                  | Yes     |
| FDX1   | uTTxOugqQiDmLiJCKk  | rs12575797 | 4.56                         | 4.36                                  | -0.089               | 1.26                         | -13.06                        | 0.1325 | 7.359  | 0.15                              | 7.114   | 7.245           | 7.34   | 7.448           | 7.843                   |         |
| FDX1   | uTTxOugqQiDmLiJCKk  | rs4576787  | 3.29                         | 3.15                                  | 0.063                | 1.55                         | 16.57                         | 0.155  | 7.359  | 0.15                              | 7.114   | 7.245           | 7.34   | 7.448           | 7.843                   |         |
| FDX1   | uTTxOugqQiDmLiJCKk  | rs12575639 | 3.32                         | 3.18                                  | 0.064                | 2.08                         | 28.7                          | 0.1875 | 7.359  | 0.15                              | 7.114   | 7.245           | 7.34   | 7.448           | 7.843                   |         |
| FECH   | E44pL8n5SrjAISTxk   | rs1062010  | 13.54                        | 12.91                                 | 0.267                | 5.88                         | 0.04                          | 0.1575 | 8.094  | 0.277                             | 7.5     | 7.918           | 8.049  | 8.212           | 9.617                   |         |
| FECH   | E44pL8n5SrjAISTxk   | rs8099511  | 4.14                         | 3.96                                  | -0.081               | 0.59                         | -7.12                         | 0.4325 | 8.094  | 0.277                             | 7.5     | 7.918           | 8.049  | 8.212           | 9.617                   |         |
| FECH   | E44pL8n5SrjAISTxk   | rs9319918  | 4.27                         | 4.09                                  | -0.083               | 0.85                         | 29.25                         | 0.335  | 8.094  | 0.277                             | 7.5     | 7.918           | 8.049  | 8.212           | 9.617                   |         |
| FECH   | E44pL8n5SrjAISTxk   | rs2048953  | 5.8                          | 5.54                                  | -0.117               | 2.24                         | 34.1                          | 0.1825 | 8.094  | 0.277                             | 7.5     | 7.918           | 8.049  | 8.212           | 9.617                   |         |
| FEM1A  | QtXlXVaksJEgOKW.E4  | rs11085098 | 3.93                         | 3.76                                  | 0.074                | 2.19                         | -7.22                         | 0.35   | 10.265 | 0.224                             | 9.644   | 10.136          | 10.269 | 10.401          | 10.943                  |         |
| FEZ2   | rLu7XeK5_IC7EeSB5U  | rs1523785  | 6.89                         | 6.58                                  | -0.137               | 3.07                         | -41.62                        | 0.295  | 9.485  | 0.448                             | 7.2     | 9.196           | 9.43   | 9.785           | 10.683                  |         |
| FEZ2   | rLu7XeK5_IC7EeSB5U  | rs3770832  | 7.85                         | 7.49                                  | -0.157               | 2.95                         | -40.77                        | 0.3125 | 9.485  | 0.448                             | 7.2     | 9.196           | 9.43   | 9.785           | 10.683                  |         |

| Symbol   | Lumi nuID          | SNP        | Population-based association |                  | % Variance Explained | Family-based association |                               | Transcript abundance (log2 scale) |       |                    |         |                 |        |                 | SNP mapping under probe |         |
|----------|--------------------|------------|------------------------------|------------------|----------------------|--------------------------|-------------------------------|-----------------------------------|-------|--------------------|---------|-----------------|--------|-----------------|-------------------------|---------|
|          |                    |            | p-value (-log10)             | p-value (-log10) |                      | p-value (-log10)         | Distance from transcript (kb) | MAF                               | Mean  | Standard Deviation | Minimum | 25th percentile | Median | 75th percentile |                         | Maximum |
| FEZ2     | rLu7XeK5_IC7EeSB5U | rs2287082  | 6.64                         | 6.34             | -0.133               | 2.74                     | -34.39                        | 0.3                               | 9.485 | 0.448              | 7.2     | 9.196           | 9.43   | 9.785           | 10.683                  |         |
| FEZ2     | rLu7XeK5_IC7EeSB5U | rs3770827  | 6.69                         | 6.39             | -0.135               | 3.21                     | -31.49                        | 0.2575                            | 9.485 | 0.448              | 7.2     | 9.196           | 9.43   | 9.785           | 10.683                  |         |
| FEZ2     | rLu7XeK5_IC7EeSB5U | rs848520   | 7.06                         | 6.75             | -0.144               | 4.04                     | -27.88                        | 0.25                              | 9.485 | 0.448              | 7.2     | 9.196           | 9.43   | 9.785           | 10.683                  |         |
| FEZ2     | rLu7XeK5_IC7EeSB5U | rs3770821  | 7.63                         | 7.28             | -0.152               | 2.61                     | -17.27                        | 0.3125                            | 9.485 | 0.448              | 7.2     | 9.196           | 9.43   | 9.785           | 10.683                  |         |
| FEZ2     | rLu7XeK5_IC7EeSB5U | rs848515   | 6.75                         | 6.45             | 0.136                | 4.62                     | -12.14                        | 0.3575                            | 9.485 | 0.448              | 7.2     | 9.196           | 9.43   | 9.785           | 10.683                  |         |
| FEZ2     | rLu7XeK5_IC7EeSB5U | rs981355   | 7.53                         | 7.19             | 0.151                | 2.75                     | -9                            | 0.2975                            | 9.485 | 0.448              | 7.2     | 9.196           | 9.43   | 9.785           | 10.683                  |         |
| FEZ2     | rLu7XeK5_IC7EeSB5U | rs1533949  | 8.55                         | 8.17             | -0.171               | 3.72                     | 1.62                          | 0.3225                            | 9.485 | 0.448              | 7.2     | 9.196           | 9.43   | 9.785           | 10.683                  |         |
| FEZ2     | rLu7XeK5_IC7EeSB5U | rs1533948  | 8.89                         | 8.48             | 0.18                 | 4.12                     | 1.74                          | 0.3392                            | 9.485 | 0.448              | 7.2     | 9.196           | 9.43   | 9.785           | 10.683                  |         |
| FEZ2     | rLu7XeK5_IC7EeSB5U | rs13406184 | 8.86                         | 8.45             | -0.178               | 4.42                     | 11.82                         | 0.3291                            | 9.485 | 0.448              | 7.2     | 9.196           | 9.43   | 9.785           | 10.683                  |         |
| FEZ2     | rLu7XeK5_IC7EeSB5U | rs848596   | 6.68                         | 6.38             | -0.132               | 4.34                     | -21.37                        | 0.495                             | 9.485 | 0.448              | 7.2     | 9.196           | 9.43   | 9.785           | 10.683                  |         |
| FEZ2     | rLu7XeK5_IC7EeSB5U | rs848637   | 6.93                         | 6.62             | -0.14                | 4.81                     | -16.5                         | 0.3175                            | 9.485 | 0.448              | 7.2     | 9.196           | 9.43   | 9.785           | 10.683                  |         |
| FEZ2     | rLu7XeK5_IC7EeSB5U | rs11691600 | 6.96                         | 6.65             | -0.139               | 3.97                     | -15.1                         | 0.335                             | 9.485 | 0.448              | 7.2     | 9.196           | 9.43   | 9.785           | 10.683                  |         |
| FEZ2     | rLu7XeK5_IC7EeSB5U | rs848619   | 6.62                         | 6.32             | -0.132               | 3.85                     | -14.47                        | 0.345                             | 9.485 | 0.448              | 7.2     | 9.196           | 9.43   | 9.785           | 10.683                  |         |
| FEZ2     | rLu7XeK5_IC7EeSB5U | rs12105545 | 6.66                         | 6.36             | -0.133               | 3.45                     | -11.03                        | 0.32                              | 9.485 | 0.448              | 7.2     | 9.196           | 9.43   | 9.785           | 10.683                  |         |
| FEZ2     | rLu7XeK5_IC7EeSB5U | rs744917   | 3.41                         | 3.27             | -0.065               | 1.59                     | 10.44                         | 0.395                             | 9.485 | 0.448              | 7.2     | 9.196           | 9.43   | 9.785           | 10.683                  |         |
| FEZ2     | rLu7XeK5_IC7EeSB5U | rs12612163 | 4.28                         | 4.10             | 0.082                | 2.7                      | 23.98                         | 0.3025                            | 9.485 | 0.448              | 7.2     | 9.196           | 9.43   | 9.785           | 10.683                  |         |
| FEZ2     | rLu7XeK5_IC7EeSB5U | rs11124523 | 4.01                         | 3.84             | 0.078                | 2.9                      | 26.03                         | 0.4347                            | 9.485 | 0.448              | 7.2     | 9.196           | 9.43   | 9.785           | 10.683                  |         |
| FEZ2     | rLu7XeK5_IC7EeSB5U | rs7600979  | 3.94                         | 3.78             | -0.076               | 2.99                     | 29.31                         | 0.435                             | 9.485 | 0.448              | 7.2     | 9.196           | 9.43   | 9.785           | 10.683                  |         |
| FGF14    | 0QUQo3ff3Srtwnno_c | rs10220127 | 3.37                         | 3.23             | 0.068                | 0.92                     | 22.04                         | 0.2211                            | 7.122 | 0.033              | 7.094   | 7.105           | 7.112  | 7.124           | 7.352                   |         |
| FGF14    | 0QUQo3ff3Srtwnno_c | rs11069458 | 3.8                          | 3.63             | 0.078                | 0.7                      | 27.65                         | 0.1825                            | 7.122 | 0.033              | 7.094   | 7.105           | 7.112  | 7.124           | 7.352                   |         |
| FGF14    | 0QUQo3ff3Srtwnno_c | rs16960116 | 4.61                         | 4.41             | 0.096                | 0.09                     | -30.45                        | 0.0825                            | 7.122 | 0.033              | 7.094   | 7.105           | 7.112  | 7.124           | 7.352                   |         |
| FHOD3    | ZlFU6fu_XnGT4fo3Uo | rs669086   | 3.8                          | 3.64             | -0.071               | 0.18                     | 17.41                         | 0.33                              | 7.127 | 0.015              | 7.098   | 7.116           | 7.123  | 7.136           | 7.179                   |         |
| FKBP1A   | ZpX0eX_ddU7zIb_Oo  | rs6131399  | 5.36                         | 5.13             | -0.107               | 1.65                     | -15.72                        | 0.1575                            | 7.886 | 0.3                | 7.26    | 7.668           | 7.86   | 8.092           | 8.879                   |         |
| FKBP1A   | ZpX0eX_ddU7zIb_Oo  | rs6134733  | 5.11                         | 4.89             | -0.103               | 2.29                     | -3.32                         | 0.1224                            | 7.886 | 0.3                | 7.26    | 7.668           | 7.86   | 8.092           | 8.879                   |         |
| FKBP1A   | ZpX0eX_ddU7zIb_Oo  | rs1294689  | 3.68                         | 3.52             | -0.073               | 3.23                     | -4.55                         | 0.285                             | 7.886 | 0.3                | 7.26    | 7.668           | 7.86   | 8.092           | 8.879                   |         |
| FKBP1A   | ZpX0eX_ddU7zIb_Oo  | rs1294690  | 3.82                         | 3.66             | -0.075               | 2.64                     | -2.05                         | 0.225                             | 7.886 | 0.3                | 7.26    | 7.668           | 7.86   | 8.092           | 8.879                   |         |
| FKSG14   | 9eebDoPI_ITUgJUFYM | rs33396    | 27.09                        | 25.80            | 0.477                | 6.15                     | -44.92                        | 0.3258                            | 8.417 | 0.692              | 7.124   | 7.833           | 8.315  | 8.94            | 9.95                    |         |
| FKSG14   | 9eebDoPI_ITUgJUFYM | rs402552   | 39.06                        | 37.19            | 0.619                | 9.59                     | -18.4                         | 0.3795                            | 8.417 | 0.692              | 7.124   | 7.833           | 8.315  | 8.94            | 9.95                    |         |
| FKSG14   | 9eebDoPI_ITUgJUFYM | rs380327   | 40.61                        | 38.66            | 0.623                | 8.95                     | -15.51                        | 0.385                             | 8.417 | 0.692              | 7.124   | 7.833           | 8.315  | 8.94            | 9.95                    |         |
| FKSG14   | 9eebDoPI_ITUgJUFYM | rs245566   | 9.11                         | 8.70             | 0.178                | 2.73                     | -12.92                        | 0.2275                            | 8.417 | 0.692              | 7.124   | 7.833           | 8.315  | 8.94            | 9.95                    |         |
| FKSG14   | 9eebDoPI_ITUgJUFYM | rs245560   | 12.74                        | 12.15            | 0.246                | 3.8                      | -8.74                         | 0.3                               | 8.417 | 0.692              | 7.124   | 7.833           | 8.315  | 8.94            | 9.95                    |         |
| FKSG14   | 9eebDoPI_ITUgJUFYM | rs12517057 | 5.14                         | 4.91             | -0.104               | 1.88                     | -8.49                         | 0.3175                            | 8.417 | 0.692              | 7.124   | 7.833           | 8.315  | 8.94            | 9.95                    |         |
| FKSG14   | 9eebDoPI_ITUgJUFYM | rs6897886  | 40.61                        | 38.66            | -0.623               | 8.76                     | 15.66                         | 0.385                             | 8.417 | 0.692              | 7.124   | 7.833           | 8.315  | 8.94            | 9.95                    |         |
| FKSG14   | 9eebDoPI_ITUgJUFYM | rs6870248  | 9.11                         | 8.70             | 0.178                | 2.73                     | 18.51                         | 0.2275                            | 8.417 | 0.692              | 7.124   | 7.833           | 8.315  | 8.94            | 9.95                    |         |
| FKSG14   | 9eebDoPI_ITUgJUFYM | rs149514   | 27.36                        | 26.06            | 0.473                | 6.46                     | -7.25                         | 0.455                             | 8.417 | 0.692              | 7.124   | 7.833           | 8.315  | 8.94            | 9.95                    |         |
| FKSG14   | 9eebDoPI_ITUgJUFYM | rs460262   | 42.24                        | 40.22            | 0.637                | 9.51                     | 4.85                          | 0.37                              | 8.417 | 0.692              | 7.124   | 7.833           | 8.315  | 8.94            | 9.95                    |         |
| FKSG14   | 9eebDoPI_ITUgJUFYM | rs16894005 | 5.55                         | 5.30             | -0.113               | 2.15                     | 11.7                          | 0.315                             | 8.417 | 0.692              | 7.124   | 7.833           | 8.315  | 8.94            | 9.95                    |         |
| FKSG14   | 9eebDoPI_ITUgJUFYM | rs36133    | 42.24                        | 40.22            | 0.637                | 9.31                     | 33.53                         | 0.37                              | 8.417 | 0.692              | 7.124   | 7.833           | 8.315  | 8.94            | 9.95                    |         |
| FKSG14   | 9eebDoPI_ITUgJUFYM | rs12517858 | 5.55                         | 5.30             | 0.113                | 2.15                     | 35.17                         | 0.315                             | 8.417 | 0.692              | 7.124   | 7.833           | 8.315  | 8.94            | 9.95                    |         |
| FKSG14   | 9eebDoPI_ITUgJUFYM | rs154861   | 41.17                        | 39.20            | 0.626                | 9.31                     | 38.07                         | 0.3725                            | 8.417 | 0.692              | 7.124   | 7.833           | 8.315  | 8.94            | 9.95                    |         |
| FLJ10781 | N5Nhvdeq7uUJgFSq4M | rs10412620 | 5.66                         | 5.41             | 0.101                | 1.19                     | -40.16                        | 0.4725                            | 7.21  | 0.095              | 7.107   | 7.15            | 7.183  | 7.236           | 7.964                   |         |
| FLJ10781 | N5Nhvdeq7uUJgFSq4M | rs11880808 | 4.94                         | 4.73             | 0.092                | 0.76                     | -38.9                         | 0.335                             | 7.21  | 0.095              | 7.107   | 7.15            | 7.183  | 7.236           | 7.964                   |         |
| FLJ10781 | N5Nhvdeq7uUJgFSq4M | rs414974   | 3.96                         | 3.79             | -0.069               | 0.58                     | -31.38                        | 0.3175                            | 7.21  | 0.095              | 7.107   | 7.15            | 7.183  | 7.236           | 7.964                   |         |
| FLJ10781 | N5Nhvdeq7uUJgFSq4M | rs8109759  | 4.4                          | 4.21             | -0.083               | 1.42                     | -20.09                        | 0.2789                            | 7.21  | 0.095              | 7.107   | 7.15            | 7.183  | 7.236           | 7.964                   |         |
| FLJ10781 | N5Nhvdeq7uUJgFSq4M | rs2311223  | 5.61                         | 5.37             | 0.107                | 1.77                     | -17.53                        | 0.2375                            | 7.21  | 0.095              | 7.107   | 7.15            | 7.183  | 7.236           | 7.964                   |         |
| FLJ10781 | N5Nhvdeq7uUJgFSq4M | rs11671212 | 5.81                         | 5.55             | 0.11                 | 1.77                     | -16.26                        | 0.395                             | 7.21  | 0.095              | 7.107   | 7.15            | 7.183  | 7.236           | 7.964                   |         |
| FLJ10781 | N5Nhvdeq7uUJgFSq4M | rs10416550 | 7.66                         | 7.32             | 0.147                | 3.4                      | -15.49                        | 0.175                             | 7.21  | 0.095              | 7.107   | 7.15            | 7.183  | 7.236           | 7.964                   |         |
| FLJ10781 | N5Nhvdeq7uUJgFSq4M | rs12609260 | 6                            | 5.74             | -0.112               | 2.09                     | -8.78                         | 0.0804                            | 7.21  | 0.095              | 7.107   | 7.15            | 7.183  | 7.236           | 7.964                   |         |
| FLJ10781 | N5Nhvdeq7uUJgFSq4M | rs8107491  | 12.63                        | 12.05            | 0.237                | 4.98                     | 0.39                          | 0.2875                            | 7.21  | 0.095              | 7.107   | 7.15            | 7.183  | 7.236           | 7.964                   |         |
| FLJ10781 | N5Nhvdeq7uUJgFSq4M | rs877589   | 6.04                         | 5.78             | -0.114               | 3.19                     | 7.17                          | 0.3275                            | 7.21  | 0.095              | 7.107   | 7.15            | 7.183  | 7.236           | 7.964                   |         |
| FLJ10781 | N5Nhvdeq7uUJgFSq4M | rs2288913  | 3.53                         | 3.38             | -0.066               | 2.48                     | 9.43                          | 0.3945                            | 7.21  | 0.095              | 7.107   | 7.15            | 7.183  | 7.236           | 7.964                   |         |
| FLJ10781 | N5Nhvdeq7uUJgFSq4M | rs7254929  | 10.19                        | 9.73             | -0.193               | 4.43                     | 16.52                         | 0.2275                            | 7.21  | 0.095              | 7.107   | 7.15            | 7.183  | 7.236           | 7.964                   |         |
| FLJ10916 | NXkAgin6kSh4U6dSq8 | rs2970901  | 3.96                         | 3.79             | -0.072               | 0.5                      | -41.08                        | 0.4375                            | 7.257 | 0.168              | 7.101   | 7.152           | 7.2    | 7.301           | 8.481                   | Yes     |
| FLJ10916 | NXkAgin6kSh4U6dSq8 | rs7581571  | 6.97                         | 6.66             | -0.133               | 4.43                     | -34.68                        | 0.1525                            | 7.257 | 0.168              | 7.101   | 7.152           | 7.2    | 7.301           | 8.481                   | Yes     |
| FLJ10916 | NXkAgin6kSh4U6dSq8 | rs10185660 | 6.37                         | 6.09             | -0.121               | 4.08                     | -6.68                         | 0.15                              | 7.257 | 0.168              | 7.101   | 7.152           | 7.2    | 7.301           | 8.481                   | Yes     |
| FLJ10916 | NXkAgin6kSh4U6dSq8 | rs11894676 | 4.07                         | 3.89             | 0.072                | 3.66                     | 17.17                         | 0.1475                            | 7.257 | 0.168              | 7.101   | 7.152           | 7.2    | 7.301           | 8.481                   | Yes     |
| FLJ10916 | NXkAgin6kSh4U6dSq8 | rs1914728  | 3.82                         | 3.66             | 0.069                | 1.98                     | 29.94                         | 0.3275                            | 7.257 | 0.168              | 7.101   | 7.152           | 7.2    | 7.301           | 8.481                   | Yes     |
| FLJ10916 | NXkAgin6kSh4U6dSq8 | rs4450598  | 3.65                         | 3.50             | -0.066               | 1.95                     | 36.61                         | 0.3275                            | 7.257 | 0.168              | 7.101   | 7.152           | 7.2    | 7.301           | 8.481                   | Yes     |
| FLJ10916 | NXkAgin6kSh4U6dSq8 | rs4260241  | 3.76                         | 3.60             | -0.066               | 3.45                     | 39.82                         | 0.145                             | 7.257 | 0.168              | 7.101   | 7.152           | 7.2    | 7.301           | 8.481                   | Yes     |
| FLJ11795 | ZeUFUUuOAPB7qUdnkg | rs10065637 | 4.7                          | 4.50             | -0.088               | 0.94                     | 26.04                         | 0.195                             | 9.487 | 0.58               | 7.51    | 9.154           | 9.595  | 9.9             | 11.125                  |         |
| FLJ11795 | ZeUFUUuOAPB7qUdnkg | rs309622   | 3.96                         | 3.79             | 0.076                | 0.96                     | 32.32                         | 0.3625                            | 9.487 | 0.58               | 7.51    | 9.154           | 9.595  | 9.9             | 11.125                  |         |
| FLJ11795 | ZeUFUUuOAPB7qUdnkg | rs182572   | 4.03                         | 3.85             | -0.074               | 0.48                     | 39.69                         | 0.2625                            | 9.487 | 0.58               | 7.51    | 9.154           | 9.595  | 9.9             | 11.125                  |         |

| Symbol   | Lumi nuID           | SNP        | Population-based association |                           |                      | Family-based association |                               |        | Transcript abundance (log2 scale) |                    |         |                 |        |                 | SNP mapping under probe |         |
|----------|---------------------|------------|------------------------------|---------------------------|----------------------|--------------------------|-------------------------------|--------|-----------------------------------|--------------------|---------|-----------------|--------|-----------------|-------------------------|---------|
|          |                     |            | p-value (-log10)             | p-value (-log10), GC adj. | % Variance Explained | p-value (-log10)         | Distance from transcript (kb) | MAF    | Mean                              | Standard Deviation | Minimum | 25th percentile | Median | 75th percentile |                         | Maximum |
| FLJ12998 | 0og6v01SXG0T_VLl84  | rs8047645  | 5.11                         | 4.89                      | 0.107                | 2.37                     | -7.62                         | 0.0575 | 7.607                             | 0.17               | 7.201   | 7.506           | 7.581  | 7.692           | 8.327                   |         |
| FLJ16231 | lJfykIBH78W0pDU64   | rs2759270  | 4.07                         | 3.89                      | 0.077                | 2.52                     | -6.13                         | 0.3266 | 7.464                             | 0.159              | 7.12    | 7.374           | 7.438  | 7.577           | 7.997                   |         |
| FLJ16231 | lJfykIBH78W0pDU64   | rs1984432  | 3.57                         | 3.42                      | -0.066               | 2.76                     | -3.25                         | 0.2803 | 7.464                             | 0.159              | 7.12    | 7.374           | 7.438  | 7.577           | 7.997                   |         |
| FLJ20364 | xn4dwXoiffC45V9Oic  | rs255827   | 5.4                          | 5.16                      | -0.106               | 3.43                     | -40.27                        | 0.3775 | 8.25                              | 0.213              | 7.542   | 8.107           | 8.237  | 8.409           | 8.769                   |         |
| FLJ20364 | xn4dwXoiffC45V9Oic  | rs25748    | 4.92                         | 4.71                      | -0.098               | 2.73                     | -9.62                         | 0.346  | 8.25                              | 0.213              | 7.542   | 8.107           | 8.237  | 8.409           | 8.769                   |         |
| FLJ20364 | xn4dwXoiffC45V9Oic  | rs255824   | 6.74                         | 6.44                      | -0.137               | 3.54                     | 3.52                          | 0.2965 | 8.25                              | 0.213              | 7.542   | 8.107           | 8.237  | 8.409           | 8.769                   |         |
| FLJ20364 | xn4dwXoiffC45V9Oic  | rs3797713  | 5.33                         | 5.09                      | 0.105                | 2.76                     | -3.3                          | 0.345  | 8.25                              | 0.213              | 7.542   | 8.107           | 8.237  | 8.409           | 8.769                   |         |
| FLJ20718 | ccOJw6rT5TXVx04f44  | rs6500279  | 4.4                          | 4.21                      | 0.085                | 2.26                     | -25.99                        | 0.125  | 9.932                             | 0.27               | 9.18    | 9.781           | 9.94   | 10.076          | 10.866                  |         |
| FLJ20718 | ccOJw6rT5TXVx04f44  | rs4785201  | 12.42                        | 11.85                     | -0.248               | 4.68                     | -10.71                        | 0.2247 | 9.932                             | 0.27               | 9.18    | 9.781           | 9.94   | 10.076          | 10.866                  |         |
| FLJ20718 | KUUCNFV_6ySiCf6OV0  | rs4785201  | 4.1                          | 3.93                      | -0.074               | 1.35                     | -10.72                        | 0.2247 | 8.226                             | 0.274              | 7.125   | 8.085           | 8.263  | 8.398           | 8.911                   |         |
| FLJ20718 | ccOJw6rT5TXVx04f44  | rs11649294 | 8.63                         | 8.24                      | 0.174                | 3.77                     | -8.57                         | 0.2462 | 9.932                             | 0.27               | 9.18    | 9.781           | 9.94   | 10.076          | 10.866                  |         |
| FLJ20718 | ccOJw6rT5TXVx04f44  | rs2287197  | 17.48                        | 16.66                     | -0.329               | 6.91                     | 6.69                          | 0.3425 | 9.932                             | 0.27               | 9.18    | 9.781           | 9.94   | 10.076          | 10.866                  |         |
| FLJ20718 | KUUCNFV_6ySiCf6OV0  | rs2287197  | 3.82                         | 3.65                      | -0.067               | 1.71                     | 6.68                          | 0.3425 | 8.226                             | 0.274              | 7.125   | 8.085           | 8.263  | 8.398           | 8.911                   |         |
| FLJ20718 | ccOJw6rT5TXVx04f44  | rs1861662  | 5.28                         | 5.05                      | -0.106               | 3.24                     | 7.48                          | 0.098  | 9.932                             | 0.27               | 9.18    | 9.781           | 9.94   | 10.076          | 10.866                  |         |
| FLJ20718 | ccOJw6rT5TXVx04f44  | rs8051216  | 16.45                        | 15.69                     | 0.313                | 6.68                     | 13.87                         | 0.335  | 9.932                             | 0.27               | 9.18    | 9.781           | 9.94   | 10.076          | 10.866                  |         |
| FLJ20718 | KUUCNFV_6ySiCf6OV0  | rs8051216  | 3.49                         | 3.35                      | 0.061                | 1.82                     | 13.86                         | 0.335  | 8.226                             | 0.274              | 7.125   | 8.085           | 8.263  | 8.398           | 8.911                   |         |
| FLJ20718 | ccOJw6rT5TXVx04f44  | rs877639   | 16.45                        | 15.69                     | -0.313               | 6.68                     | 18.34                         | 0.335  | 9.932                             | 0.27               | 9.18    | 9.781           | 9.94   | 10.076          | 10.866                  |         |
| FLJ20718 | KUUCNFV_6ySiCf6OV0  | rs877639   | 3.49                         | 3.35                      | -0.061               | 1.82                     | 18.33                         | 0.335  | 8.226                             | 0.274              | 7.125   | 8.085           | 8.263  | 8.398           | 8.911                   |         |
| FLJ20718 | ccOJw6rT5TXVx04f44  | rs2356837  | 8.38                         | 8.00                      | 0.168                | 4.01                     | -19.4                         | 0.205  | 9.932                             | 0.27               | 9.18    | 9.781           | 9.94   | 10.076          | 10.866                  |         |
| FLJ20718 | ccOJw6rT5TXVx04f44  | rs1477128  | 3.64                         | 3.49                      | 0.07                 | 1.69                     | -4.75                         | 0.1175 | 9.932                             | 0.27               | 9.18    | 9.781           | 9.94   | 10.076          | 10.866                  |         |
| FLJ20718 | ccOJw6rT5TXVx04f44  | rs8046148  | 8.82                         | 8.42                      | 0.179                | 4.65                     | 2.65                          | 0.235  | 9.932                             | 0.27               | 9.18    | 9.781           | 9.94   | 10.076          | 10.866                  |         |
| FLJ20718 | ccOJw6rT5TXVx04f44  | rs6500291  | 11.03                        | 10.52                     | 0.219                | 4.56                     | 14.52                         | 0.29   | 9.932                             | 0.27               | 9.18    | 9.781           | 9.94   | 10.076          | 10.866                  |         |
| FLJ21125 | iuVmmP93r.t.nvXpjk  | rs11089314 | 4.53                         | 4.33                      | 0.084                | 2.78                     | -4.23                         | 0.145  | 8.663                             | 0.239              | 7.884   | 8.535           | 8.653  | 8.802           | 9.281                   |         |
| FLJ21125 | iuVmmP93r.t.nvXpjk  | rs1052978  | 4.53                         | 4.33                      | -0.084               | 3.06                     | 0.36                          | 0.215  | 8.663                             | 0.239              | 7.884   | 8.535           | 8.653  | 8.802           | 9.281                   |         |
| FLJ21742 | fp5_lbiluURFVwffeM  | rs8109218  | 3.29                         | 3.15                      | 0.062                | 1.14                     | 9.2                           | 0.3191 | 7.522                             | 0.185              | 7.153   | 7.398           | 7.504  | 7.629           | 8.208                   |         |
| FLJ22374 | r_Uq3ecX_3k1dX51ec  | rs11768076 | 4.34                         | 4.15                      | -0.084               | 1.04                     | 18                            | 0.2775 | 7.19                              | 0.059              | 7.106   | 7.148           | 7.181  | 7.214           | 7.55                    |         |
| FLJ22374 | r_Uq3ecX_3k1dX51ec  | rs12701035 | 4.34                         | 4.15                      | 0.084                | 1.02                     | 20.65                         | 0.2775 | 7.19                              | 0.059              | 7.106   | 7.148           | 7.181  | 7.214           | 7.55                    |         |
| FLJ23322 | 0vXLd99PifXRSQ3kf0  | rs139954   | 3.87                         | 3.71                      | -0.076               | 0.77                     | -34.38                        | 0.065  | 7.232                             | 0.075              | 7.123   | 7.182           | 7.217  | 7.262           | 7.643                   |         |
| FLJ23322 | 0vXLd99PifXRSQ3kf0  | rs139985   | 3.39                         | 3.25                      | -0.066               | 0.61                     | -27                           | 0.0675 | 7.232                             | 0.075              | 7.123   | 7.182           | 7.217  | 7.262           | 7.643                   |         |
| FLJ23322 | 0vXLd99PifXRSQ3kf0  | rs1000427  | 3.55                         | 3.40                      | -0.067               | 0.59                     | 5.82                          | 0.0825 | 7.232                             | 0.075              | 7.123   | 7.182           | 7.217  | 7.262           | 7.643                   |         |
| FLJ33360 | 6STNV7ekQKIRL4XuBI  | rs271399   | 4.19                         | 4.01                      | -0.074               | 1.72                     | 31.12                         | 0.495  | 7.189                             | 0.105              | 7.107   | 7.134           | 7.163  | 7.21            | 8.229                   |         |
| FLJ33360 | 6STNV7ekQKIRL4XuBI  | rs7702608  | 3.72                         | 3.56                      | 0.065                | 0.93                     | 44.41                         | 0.392  | 7.189                             | 0.105              | 7.107   | 7.134           | 7.163  | 7.21            | 8.229                   |         |
| FLJ33790 | 0l5Ed51dOkXUZASV8E  | rs534812   | 3.52                         | 3.37                      | -0.066               | 1.82                     | -22.51                        | 0.41   | 7.436                             | 0.169              | 7.153   | 7.329           | 7.415  | 7.509           | 8.157                   |         |
| FLJ33790 | 0l5Ed51dOkXUZASV8E  | rs571632   | 3.52                         | 3.37                      | 0.066                | 1.83                     | -9.33                         | 0.4075 | 7.436                             | 0.169              | 7.153   | 7.329           | 7.415  | 7.509           | 8.157                   |         |
| FLJ35429 | EFQApU5CuiruA45VLI  | rs1611371  | 4                            | 3.83                      | 0.073                | 0.82                     | -22.78                        | 0.2286 | 7.384                             | 0.148              | 7.135   | 7.281           | 7.356  | 7.48            | 7.915                   |         |
| FLJ35429 | EFQApU5CuiruA45VLI  | rs2523399  | 3.94                         | 3.77                      | 0.073                | 1.8                      | -2.73                         | 0.4573 | 7.384                             | 0.148              | 7.135   | 7.281           | 7.356  | 7.48            | 7.915                   |         |
| FLJ35429 | EFQApU5CuiruA45VLI  | rs932338   | 5.12                         | 4.90                      | 0.096                | 0.8                      | 4.13                          | 0.1809 | 7.384                             | 0.148              | 7.135   | 7.281           | 7.356  | 7.48            | 7.915                   |         |
| FLJ35429 | EFQApU5CuiruA45VLI  | rs1633068  | 4.98                         | 4.77                      | -0.092               | 0.8                      | 7.54                          | 0.185  | 7.384                             | 0.148              | 7.135   | 7.281           | 7.356  | 7.48            | 7.915                   |         |
| FLJ35429 | EFQApU5CuiruA45VLI  | rs1610628  | 4.86                         | 4.66                      | -0.09                | 0.74                     | 11.44                         | 0.1834 | 7.384                             | 0.148              | 7.135   | 7.281           | 7.356  | 7.48            | 7.915                   |         |
| FLJ36980 | Kun54l6ziw7oN6oKrk  | rs2460892  | 3.44                         | 3.29                      | 0.063                | 1.21                     | -9.75                         | 0.2675 | 7.173                             | 0.035              | 7.111   | 7.148           | 7.171  | 7.191           | 7.32                    |         |
| FLJ38451 | TNTReQJxdOVfxPV1_U  | rs2112502  | 3.9                          | 3.74                      | -0.07                | 0.71                     | -7.67                         | 0.3325 | 9.523                             | 0.28               | 8.647   | 9.371           | 9.532  | 9.691           | 10.45                   |         |
| FLJ40852 | fKrdS514ddEne9c4Qo  | rs7791469  | 5.06                         | 4.84                      | 0.096                | 2.35                     | -14.5                         | 0.485  | 7.364                             | 0.146              | 7.1     | 7.245           | 7.355  | 7.44            | 7.969                   |         |
| FLJ40852 | fKrdS514ddEne9c4Qo  | rs10261515 | 3.97                         | 3.80                      | -0.074               | 1.49                     | -5.43                         | 0.495  | 7.364                             | 0.146              | 7.1     | 7.245           | 7.355  | 7.44            | 7.969                   |         |
| FLJ40852 | fKrdS514ddEne9c4Qo  | rs6963959  | 5.18                         | 4.95                      | -0.098               | 3.14                     | 3.57                          | 0.4175 | 7.364                             | 0.146              | 7.1     | 7.245           | 7.355  | 7.44            | 7.969                   |         |
| FLJ40852 | fKrdS514ddEne9c4Qo  | rs1008318  | 5.73                         | 5.47                      | 0.109                | 2.59                     | -4.4                          | 0.4775 | 7.364                             | 0.146              | 7.1     | 7.245           | 7.355  | 7.44            | 7.969                   |         |
| FLJ40852 | fKrdS514ddEne9c4Qo  | rs917197   | 7                            | 6.69                      | 0.139                | 3.08                     | 29.94                         | 0.4774 | 7.364                             | 0.146              | 7.1     | 7.245           | 7.355  | 7.44            | 7.969                   |         |
| FLJ40852 | fKrdS514ddEne9c4Qo  | rs2234002  | 6.29                         | 6.01                      | -0.124               | 2.82                     | 40.77                         | 0.4925 | 7.364                             | 0.146              | 7.1     | 7.245           | 7.355  | 7.44            | 7.969                   |         |
| FLJ40852 | fKrdS514ddEne9c4Qo  | rs2190245  | 7.02                         | 6.71                      | 0.139                | 3.08                     | 46.06                         | 0.4775 | 7.364                             | 0.146              | 7.1     | 7.245           | 7.355  | 7.44            | 7.969                   |         |
| FLJ40852 | fKrdS514ddEne9c4Qo  | rs11773137 | 6.29                         | 6.01                      | 0.124                | 2.82                     | 48.29                         | 0.4925 | 7.364                             | 0.146              | 7.1     | 7.245           | 7.355  | 7.44            | 7.969                   |         |
| FLJ43692 | rdqf.h4otf4QoAH3NI  | rs7779313  | 4.52                         | 4.32                      | -0.09                | 2.19                     | -21.93                        | 0.19   | 7.166                             | 0.045              | 7.106   | 7.137           | 7.156  | 7.178           | 7.394                   |         |
| FLJ43752 | oegVAeXkdC1Sd5U0ck  | rs513349   | 3.82                         | 3.69                      | 0.076                | 3.82                     | -12.16                        | 0.395  | 7.209                             | 0.072              | 7.11    | 7.159           | 7.199  | 7.236           | 7.657                   |         |
| FLJ43752 | oegVAeXkdC1Sd5U0ck  | rs210138   | 5.67                         | 5.42                      | 0.111                | 1.87                     | -11.35                        | 0.17   | 7.209                             | 0.072              | 7.11    | 7.159           | 7.199  | 7.236           | 7.657                   |         |
| FLJ43752 | oegVAeXkdC1Sd5U0ck  | rs210139   | 3.72                         | 3.56                      | 0.07                 | 3.55                     | -10.47                        | 0.39   | 7.209                             | 0.072              | 7.11    | 7.159           | 7.199  | 7.236           | 7.657                   |         |
| FLJ43752 | oegVAeXkdC1Sd5U0ck  | rs375555   | 5.87                         | 5.61                      | -0.116               | 3.08                     | -3.37                         | 0.1975 | 7.209                             | 0.072              | 7.11    | 7.159           | 7.199  | 7.236           | 7.657                   |         |
| FLJ44216 | cnXntc55ofvgV45lIf0 | rs2303666  | 4.2                          | 4.02                      | 0.079                | 3.5                      | 20.54                         | 0.11   | 8.4                               | 0.187              | 7.771   | 8.299           | 8.42   | 8.486           | 9.435                   |         |
| FN3KRP   | WrE1KLfT597zxVt13k  | rs1046875  | 7.74                         | 7.39                      | 0.155                | 2.79                     | -0.43                         | 0.3687 | 10.609                            | 0.348              | 9.556   | 10.363          | 10.633 | 10.854          | 11.42                   | Yes     |
| FN3KRP   | WrE1KLfT597zxVt13k  | rs1046889  | 4.42                         | 4.23                      | -0.086               | 1.09                     | -0.35                         | 0.1375 | 10.609                            | 0.348              | 9.556   | 10.363          | 10.633 | 10.854          | 11.42                   |         |
| FN3KRP   | WrE1KLfT597zxVt13k  | rs652265   | 5.97                         | 5.70                      | 0.121                | 3.29                     | 32.53                         | 0.3825 | 10.609                            | 0.348              | 9.556   | 10.363          | 10.633 | 10.854          | 11.42                   |         |
| FN3KRP   | WrE1KLfT597zxVt13k  | rs2677913  | 5.81                         | 5.55                      | -0.118               | 3.17                     | 35.02                         | 0.37   | 10.609                            | 0.348              | 9.556   | 10.363          | 10.633 | 10.854          | 11.42                   |         |
| FN3KRP   | WrE1KLfT597zxVt13k  | rs583245   | 5.82                         | 5.56                      | 0.118                | 3.3                      | 37.59                         | 0.3725 | 10.609                            | 0.348              | 9.556   | 10.363          | 10.633 | 10.854          | 11.42                   |         |
| FN3KRP   | WrE1KLfT597zxVt13k  | rs11078011 | 5.82                         | 5.56                      | -0.118               | 3.3                      | 47.69                         | 0.3725 | 10.609                            | 0.348              | 9.556   | 10.363          | 10.633 | 10.854          | 11.42                   |         |
| FNBP1L   | 61sopC9fjygy5BezOo  | rs17109997 | 4.73                         | 4.52                      | 0.093                | 1.81                     | -13.3                         | 0.085  | 7.459                             | 0.146              | 7.149   | 7.367           | 7.446  | 7.548           | 8.03                    |         |



| Symbol  | Lumi nuID          | SNP        | Population-based association |                  | % Variance Explained | Family-based association |                               | Transcript abundance (log2 scale) |        |                    |         |                 |        |                 | SNP mapping under probe |
|---------|--------------------|------------|------------------------------|------------------|----------------------|--------------------------|-------------------------------|-----------------------------------|--------|--------------------|---------|-----------------|--------|-----------------|-------------------------|
|         |                    |            | p-value (-log10)             | p-value (-log10) |                      | p-value (-log10)         | Distance from transcript (kb) | MAF                               | Mean   | Standard Deviation | Minimum | 25th percentile | Median | 75th percentile |                         |
| FNBP1L  | 61sopC9fjygy5BezOo | rs2624437  | 5.26                         | 5.03             | 0.105                | 2.98                     | -1.28                         | 0.0975                            | 7.459  | 0.146              | 7.149   | 7.367           | 7.446  | 7.548           | 8.03                    |
| FOLR3   | NIW3bqPpJ141CrXeo  | rs7925545  | 6.71                         | 6.41             | 0.127                | 2.7                      | -1.23                         | 0.0775                            | 8.487  | 1.148              | 7.101   | 7.566           | 8.122  | 9.166           | 12.541                  |
| FOXA1   | ZINu5_TUu85H9RL6E  | rs1884798  | 4.33                         | 4.15             | 0.084                | 1.66                     | -11.4                         | 0.3525                            | 7.135  | 0.053              | 7.102   | 7.113           | 7.12   | 7.135           | 7.54                    |
| FOXA1   | ZINu5_TUu85H9RL6E  | rs7144658  | 3.29                         | 3.15             | -0.064               | 1.52                     | 2.55                          | 0.435                             | 7.135  | 0.053              | 7.102   | 7.113           | 7.12   | 7.135           | 7.54                    |
| FOXA1   | ZINu5_TUu85H9RL6E  | rs1008236  | 4.18                         | 4.00             | 0.08                 | 1.78                     | 9.75                          | 0.355                             | 7.135  | 0.053              | 7.102   | 7.113           | 7.12   | 7.135           | 7.54                    |
| FOXJ1   | xsninweoqOWJ_egceo | rs2585738  | 3.75                         | 3.59             | 0.071                | 1.72                     | 10.17                         | 0.2625                            | 7.201  | 0.074              | 7.107   | 7.155           | 7.185  | 7.232           | 7.59                    |
| FOXRED1 | H6R4UoCHI3hXfJISJU | rs478309   | 6.19                         | 5.92             | 0.127                | 4.85                     | 1.41                          | 0.195                             | 9.1    | 0.296              | 7.544   | 8.933           | 9.103  | 9.259           | 9.824                   |
| FOXRED1 | H6R4UoCHI3hXfJISJU | rs583697   | 3.9                          | 3.74             | 0.078                | 4.3                      | 31.99                         | 0.2525                            | 9.1    | 0.296              | 7.544   | 8.933           | 9.103  | 9.259           | 9.824                   |
| FOXRED1 | H6R4UoCHI3hXfJISJU | rs611151   | 3.74                         | 3.58             | -0.074               | 3.88                     | 40.44                         | 0.2225                            | 9.1    | 0.296              | 7.544   | 8.933           | 9.103  | 9.259           | 9.824                   |
| FRMD4A  | iVTUmNI4UvHny8HK4  | rs7080759  | 3.72                         | 3.56             | 0.068                | 1.67                     | -135.38                       | 0.25                              | 7.155  | 0.054              | 7.093   | 7.121           | 7.142  | 7.172           | 7.564                   |
| FSBP    | foshZXXYEKSpCZFfzA | rs3019146  | 11.42                        | 10.90            | 0.23                 | 3.36                     | -30.07                        | 0.3775                            | 7.212  | 0.093              | 7.102   | 7.146           | 7.184  | 7.247           | 7.561                   |
| FSBP    | foshZXXYEKSpCZFfzA | rs2246066  | 10.04                        | 9.59             | 0.207                | 2.36                     | -25.02                        | 0.4041                            | 7.212  | 0.093              | 7.102   | 7.146           | 7.184  | 7.247           | 7.561                   |
| FSBP    | foshZXXYEKSpCZFfzA | rs2930961  | 12.22                        | 11.65            | -0.243               | 3.39                     | -0.37                         | 0.35                              | 7.212  | 0.093              | 7.102   | 7.146           | 7.184  | 7.247           | 7.561                   |
| FSBP    | foshZXXYEKSpCZFfzA | rs935052   | 9.78                         | 9.33             | -0.198               | 2.94                     | 12.81                         | 0.43                              | 7.212  | 0.093              | 7.102   | 7.146           | 7.184  | 7.247           | 7.561                   |
| FSD1    | WiUpFdd7R_efol8HUg | rs4807578  | 5.78                         | 5.52             | -0.113               | 1.23                     | 1.62                          | 0.3375                            | 7.379  | 0.146              | 7.128   | 7.273           | 7.356  | 7.458           | 7.961                   |
| FTSJ2   | fiDoOelV6N5E3I2ees | rs10257990 | 4.4                          | 4.21             | -0.087               | 2.96                     | -41.26                        | 0.3625                            | 7.169  | 0.048              | 7.105   | 7.134           | 7.155  | 7.193           | 7.381                   |
| FTSJ2   | fiDoOelV6N5E3I2ees | rs7799006  | 6.25                         | 5.97             | 0.13                 | 3.52                     | -3.61                         | 0.325                             | 7.169  | 0.048              | 7.105   | 7.134           | 7.155  | 7.193           | 7.381                   |
| FUT10   | QkuJi9PKyd6ep.tJQ  | rs1533470  | 8.14                         | 7.77             | 0.163                | 3.67                     | -44.29                        | 0.395                             | 7.136  | 0.027              | 7.101   | 7.116           | 7.128  | 7.147           | 7.251                   |
| FUT10   | QkuJi9PKyd6ep.tJQ  | rs12155581 | 9.97                         | 9.52             | -0.2                 | 4.49                     | -42.86                        | 0.445                             | 7.136  | 0.027              | 7.101   | 7.116           | 7.128  | 7.147           | 7.251                   |
| FUT10   | QkuJi9PKyd6ep.tJQ  | rs6982159  | 8.87                         | 8.47             | -0.18                | 3.24                     | -38.2                         | 0.4697                            | 7.136  | 0.027              | 7.101   | 7.116           | 7.128  | 7.147           | 7.251                   |
| FUT10   | QkuJi9PKyd6ep.tJQ  | rs2348613  | 8.29                         | 7.91             | 0.167                | 3.44                     | -36.14                        | 0.392                             | 7.136  | 0.027              | 7.101   | 7.116           | 7.128  | 7.147           | 7.251                   |
| FUT10   | QkuJi9PKyd6ep.tJQ  | rs2732315  | 8.34                         | 7.97             | 0.168                | 3.46                     | -17.34                        | 0.392                             | 7.136  | 0.027              | 7.101   | 7.116           | 7.128  | 7.147           | 7.251                   |
| FUT10   | QkuJi9PKyd6ep.tJQ  | rs2732316  | 8.35                         | 7.98             | 0.167                | 3.16                     | -16.56                        | 0.3925                            | 7.136  | 0.027              | 7.101   | 7.116           | 7.128  | 7.147           | 7.251                   |
| FUT10   | QkuJi9PKyd6ep.tJQ  | rs2676415  | 6.81                         | 6.50             | 0.141                | 2.42                     | -0.05                         | 0.2513                            | 7.136  | 0.027              | 7.101   | 7.116           | 7.128  | 7.147           | 7.251                   |
| FUT10   | QkuJi9PKyd6ep.tJQ  | rs6468171  | 8.57                         | 8.18             | -0.171               | 3.53                     | 25.41                         | 0.4075                            | 7.136  | 0.027              | 7.101   | 7.116           | 7.128  | 7.147           | 7.251                   |
| FUT10   | QkuJi9PKyd6ep.tJQ  | rs2304748  | 9.14                         | 8.72             | 0.185                | 4.2                      | 39.28                         | 0.435                             | 7.136  | 0.027              | 7.101   | 7.116           | 7.128  | 7.147           | 7.251                   |
| FXN     | oiJXrXITL0IECy_1f4 | rs3829062  | 3.54                         | 3.39             | -0.065               | 2.06                     | 17.85                         | 0.4673                            | 7.456  | 0.16               | 7.103   | 7.352           | 7.434  | 7.544           | 7.965                   |
| FXN     | oiJXrXITL0IECy_1f4 | rs2309394  | 3.86                         | 3.69             | 0.071                | 2.22                     | -17.84                        | 0.4675                            | 7.456  | 0.16               | 7.103   | 7.352           | 7.434  | 7.544           | 7.965                   |
| FXN     | oiJXrXITL0IECy_1f4 | rs3793465  | 4.21                         | 4.03             | 0.078                | 2.3                      | -9.51                         | 0.43                              | 7.456  | 0.16               | 7.103   | 7.352           | 7.434  | 7.544           | 7.965                   |
| FXN     | oiJXrXITL0IECy_1f4 | rs7859021  | 3.33                         | 3.19             | 0.061                | 2.36                     | 5.31                          | 0.4375                            | 7.456  | 0.16               | 7.103   | 7.352           | 7.434  | 7.544           | 7.965                   |
| FXN     | oiJXrXITL0IECy_1f4 | rs953588   | 3.67                         | 3.52             | -0.068               | 3                        | 15.88                         | 0.3825                            | 7.456  | 0.16               | 7.103   | 7.352           | 7.434  | 7.544           | 7.965                   |
| G3BP2   | rVX_Dit9Tv4qAt_Rz4 | rs2055997  | 3.72                         | 3.56             | -0.071               | 1.88                     | -32.88                        | 0.309                             | 9.346  | 0.415              | 7.128   | 9.194           | 9.409  | 9.624           | 9.957                   |
| GABBR2  | E7aK4I7m3sF7h14m4  | rs1167763  | 3.8                          | 3.64             | 0.075                | 0.88                     | -125.31                       | 0.0875                            | 7.112  | 0.009              | 7.096   | 7.106           | 7.111  | 7.117           | 7.144                   |
| GABBR2  | E7aK4I7m3sF7h14m4  | rs1999500  | 3.3                          | 3.16             | -0.062               | 1.15                     | -114.96                       | 0.2825                            | 7.112  | 0.009              | 7.096   | 7.106           | 7.111  | 7.117           | 7.144                   |
| GABBR2  | E7aK4I7m3sF7h14m4  | rs1034160  | 3.29                         | 3.15             | -0.061               | 1.16                     | -113.13                       | 0.2814                            | 7.112  | 0.009              | 7.096   | 7.106           | 7.111  | 7.117           | 7.144                   |
| GALNT4  | 9N1yRYI6R8pJ.Swurg | rs6538189  | 5.31                         | 5.08             | -0.104               | 2.18                     | -27.27                        | 0.23                              | 8.262  | 0.336              | 7.106   | 8.072           | 8.267  | 8.46            | 9.428                   |
| GALNT4  | 9N1yRYI6R8pJ.Swurg | rs10858881 | 5.31                         | 5.08             | -0.104               | 2.18                     | -21.71                        | 0.23                              | 8.262  | 0.336              | 7.106   | 8.072           | 8.267  | 8.46            | 9.428                   |
| GALNT4  | 9N1yRYI6R8pJ.Swurg | rs10777177 | 3.42                         | 3.28             | 0.064                | 0.83                     | -14.09                        | 0.4648                            | 8.262  | 0.336              | 7.106   | 8.072           | 8.267  | 8.46            | 9.428                   |
| GAS2    | lcO08SHxssX7MXqEqc | rs337484   | 3.91                         | 3.74             | 0.074                | 0.38                     | -32.32                        | 0.1556                            | 7.179  | 0.062              | 7.109   | 7.14            | 7.166  | 7.196           | 7.585                   |
| GAS2    | lcO08SHxssX7MXqEqc | rs1027536  | 3.95                         | 3.78             | 0.073                | 0.66                     | -11.44                        | 0.1625                            | 7.179  | 0.062              | 7.109   | 7.14            | 7.166  | 7.196           | 7.585                   |
| GAS2    | lcO08SHxssX7MXqEqc | rs619365   | 3.75                         | 3.59             | -0.07                | 0.66                     | -7.01                         | 0.165                             | 7.179  | 0.062              | 7.109   | 7.14            | 7.166  | 7.196           | 7.585                   |
| GATC    | 9g8cQB1TZIuix.uIU  | rs2235218  | 4.84                         | 4.63             | -0.092               | 2.74                     | 4.34                          | 0.32                              | 7.712  | 0.245              | 7.171   | 7.54            | 7.705  | 7.889           | 8.351                   |
| GATM    | 3SI46J_6el0jEXCCfl | rs1719247  | 3.3                          | 3.16             | -0.061               | 0.89                     | -32.34                        | 0.2425                            | 7.174  | 0.081              | 7.101   | 7.122           | 7.141  | 7.195           | 7.575                   |
| GATM    | 3SI46J_6el0jEXCCfl | rs4774580  | 3.62                         | 3.46             | 0.067                | 1.3                      | -1.24                         | 0.255                             | 7.174  | 0.081              | 7.101   | 7.122           | 7.141  | 7.195           | 7.575                   |
| GATM    | 3SI46J_6el0jEXCCfl | rs1346268  | 3.62                         | 3.46             | 0.067                | 1.3                      | -10.81                        | 0.255                             | 7.174  | 0.081              | 7.101   | 7.122           | 7.141  | 7.195           | 7.575                   |
| GATS    | KEX7C7Vd6.Xa66ZXgc | rs3735241  | 4.69                         | 4.48             | 0.088                | 2.36                     | -10.41                        | 0.49                              | 8.579  | 0.36               | 7.649   | 8.327           | 8.588  | 8.779           | 9.867                   |
| GATS    | KEX7C7Vd6.Xa66ZXgc | rs1061230  | 5.81                         | 5.55             | 0.115                | 2.66                     | 0.7                           | 0.28                              | 8.579  | 0.36               | 7.649   | 8.327           | 8.588  | 8.779           | 9.867                   |
| GATS    | KEX7C7Vd6.Xa66ZXgc | rs2950520  | 5.81                         | 5.55             | 0.115                | 2.52                     | 20.59                         | 0.28                              | 8.579  | 0.36               | 7.649   | 8.327           | 8.588  | 8.779           | 9.867                   |
| GBL     | x3IXV5Wb9KI2tIlgRQ | rs26828    | 3.86                         | 3.70             | -0.073               | 1.09                     | -10.96                        | 0.5                               | 8.638  | 0.26               | 8.124   | 8.451           | 8.611  | 8.784           | 9.434                   |
| GBL     | x3IXV5Wb9KI2tIlgRQ | rs26873    | 3.77                         | 3.58             | 0.07                 | 0.97                     | -8.13                         | 0.4225                            | 8.638  | 0.26               | 8.124   | 8.451           | 8.611  | 8.784           | 9.434                   |
| GCAT    | BWrEjdJLkyYoIT4WeY | rs5756813  | 5.57                         | 5.51             | -0.117               | 2.17                     | -28.48                        | 0.3675                            | 7.542  | 0.218              | 7.125   | 7.396           | 7.511  | 7.654           | 8.4                     |
| GCAT    | BWrEjdJLkyYoIT4WeY | rs4821714  | 5.64                         | 5.39             | -0.113               | 1.73                     | -11.5                         | 0.38                              | 7.542  | 0.218              | 7.125   | 7.396           | 7.511  | 7.654           | 8.4                     |
| GCAT    | BWrEjdJLkyYoIT4WeY | rs2413485  | 5.64                         | 5.39             | -0.113               | 1.73                     | -10.04                        | 0.38                              | 7.542  | 0.218              | 7.125   | 7.396           | 7.511  | 7.654           | 8.4                     |
| GCAT    | BWrEjdJLkyYoIT4WeY | rs2285177  | 7.2                          | 6.88             | -0.148               | 2.64                     | 1.94                          | 0.305                             | 7.542  | 0.218              | 7.125   | 7.396           | 7.511  | 7.654           | 8.4                     |
| GCAT    | BWrEjdJLkyYoIT4WeY | rs2285179  | 4.22                         | 4.04             | 0.086                | 1.65                     | -0.95                         | 0.4315                            | 7.542  | 0.218              | 7.125   | 7.396           | 7.511  | 7.654           | 8.4                     |
| GCAT    | BWrEjdJLkyYoIT4WeY | rs6000905  | 3.86                         | 3.69             | -0.076               | 1.36                     | 28.53                         | 0.385                             | 7.542  | 0.218              | 7.125   | 7.396           | 7.511  | 7.654           | 8.4                     |
| GCDH    | cU3qrLl856u_iSLiog | rs11085825 | 5.97                         | 5.71             | 0.125                | 2.25                     | -3.33                         | 0.39                              | 10.222 | 0.271              | 9.488   | 10.044          | 10.217 | 10.335          | 11.171                  |
| GCDH    | QiflCorpo6LqC4IEeM | rs11085825 | 3.75                         | 3.59             | 0.076                | 1.65                     | -3.33                         | 0.39                              | 8.477  | 0.185              | 8.103   | 8.354           | 8.471  | 8.581           | 9.162                   |
| GCDH    | cU3qrLl856u_iSLiog | rs11667458 | 4.51                         | 4.31             | -0.092               | 2.49                     | 8.77                          | 0.165                             | 10.222 | 0.271              | 9.488   | 10.044          | 10.217 | 10.335          | 11.171                  |
| GCDH    | cU3qrLl856u_iSLiog | rs2293683  | 6.19                         | 5.99             | -0.13                | 2.46                     | 28.5                          | 0.385                             | 10.222 | 0.271              | 9.488   | 10.044          | 10.217 | 10.335          | 11.171                  |
| GCDH    | QiflCorpo6LqC4IEeM | rs2293683  | 3.76                         | 3.60             | -0.076               | 1.8                      | 28.5                          | 0.385                             | 8.477  | 0.185              | 8.103   | 8.354           | 8.471  | 8.581           | 9.162                   |
| GCDH    | cU3qrLl856u_iSLiog | rs1010222  | 6.18                         | 5.90             | -0.13                | 2.19                     | 37.83                         | 0.39                              | 10.222 | 0.271              | 9.488   | 10.044          | 10.217 | 10.335          | 11.171                  |

| Symbol | Lumi nuID          | SNP        | Population-based association |                      |                               | Family-based association |        |        | Transcript abundance (log2 scale) |                 |        |                 |         |        | SNP mapping under probe |     |
|--------|--------------------|------------|------------------------------|----------------------|-------------------------------|--------------------------|--------|--------|-----------------------------------|-----------------|--------|-----------------|---------|--------|-------------------------|-----|
|        |                    |            | p-value (-log10)             | % Variance Explained | Distance from transcript (kb) | p-value (-log10)         | MAF    | Mean   | Standard Deviation                | 25th percentile | Median | 75th percentile | Maximum |        |                         |     |
| GCDH   | QiflCorpo6LqC4iEeM | rs1010222  | 3.95                         | 3.78                 | -0.081                        | 1.7                      | 37.83  | 0.39   | 8.477                             | 0.185           | 8.103  | 8.354           | 8.471   | 8.581  | 9.162                   |     |
| GCNT2  | Hlky7_py6v3hJU6g5U | rs504117   | 4.6                          | 4.40                 | 0.091                         | 2.71                     | -37.6  | 0.44   | 7.479                             | 0.182           | 7.131  | 7.368           | 7.457   | 7.553  | 8.72                    |     |
| GCNT2  | Hlky7_py6v3hJU6g5U | rs631299   | 5.46                         | 5.22                 | -0.109                        | 2.95                     | -27.52 | 0.45   | 7.479                             | 0.182           | 7.131  | 7.368           | 7.457   | 7.553  | 8.72                    |     |
| GCNT2  | Hlky7_py6v3hJU6g5U | rs560194   | 5.51                         | 5.26                 | 0.11                          | 2.96                     | -27.16 | 0.4475 | 7.479                             | 0.182           | 7.131  | 7.368           | 7.457   | 7.553  | 8.72                    |     |
| GCNT2  | Hlky7_py6v3hJU6g5U | rs597697   | 3.47                         | 3.32                 | -0.069                        | 1.97                     | -17    | 0.4077 | 7.479                             | 0.182           | 7.131  | 7.368           | 7.457   | 7.553  | 8.72                    |     |
| GCNT2  | 6qBJSGLn0INGKOP2gU | rs6456591  | 4.26                         | 4.08                 | 0.083                         | 1.79                     | 14.23  | 0.075  | 7.209                             | 0.062           | 7.106  | 7.166           | 7.202   | 7.236  | 7.527                   |     |
| GDE1   | WnxZ90X9BVN7pf7UpU | rs3830052  | 4.11                         | 3.94                 | -0.077                        | 2.47                     | -11.48 | 0.0875 | 8.513                             | 0.267           | 7.887  | 8.319           | 8.509   | 8.695  | 9.43                    |     |
| GDE1   | WnxZ90X9BVN7pf7UpU | rs9302382  | 4.49                         | 4.30                 | 0.083                         | 2.85                     | 4.01   | 0.07   | 8.513                             | 0.267           | 7.887  | 8.319           | 8.509   | 8.695  | 9.43                    |     |
| GDE1   | WnxZ90X9BVN7pf7UpU | rs3751821  | 3.87                         | 3.71                 | -0.07                         | 2.37                     | 14.05  | 0.0653 | 8.513                             | 0.267           | 7.887  | 8.319           | 8.509   | 8.695  | 9.43                    |     |
| GDE1   | WnxZ90X9BVN7pf7UpU | rs2285661  | 4.49                         | 4.30                 | -0.083                        | 2.85                     | 18.32  | 0.07   | 8.513                             | 0.267           | 7.887  | 8.319           | 8.509   | 8.695  | 9.43                    |     |
| GDF2   | Tl6ir76jkkK44AohKo | rs2376635  | 3.57                         | 3.42                 | -0.065                        | 2.03                     | -23.05 | 0.0985 | 7.316                             | 0.073           | 7.143  | 7.272           | 7.309   | 7.356  | 7.789                   |     |
| GDPD5  | lu1JIXQpIKtFwVKLUQ | rs1790144  | 5.46                         | 5.22                 | 0.103                         | 1.63                     | -24.97 | 0.1025 | 8.986                             | 0.567           | 7.839  | 8.575           | 8.899   | 9.314  | 10.755                  |     |
| GDPD5  | lu1JIXQpIKtFwVKLUQ | rs1793399  | 3.42                         | 3.28                 | -0.062                        | 1.6                      | -16.36 | 0.125  | 8.986                             | 0.567           | 7.839  | 8.575           | 8.899   | 9.314  | 10.755                  |     |
| GDPD5  | lu1JIXQpIKtFwVKLUQ | rs947844   | 3.85                         | 3.68                 | 0.07                          | 1.6                      | -7.98  | 0.0825 | 8.986                             | 0.567           | 7.839  | 8.575           | 8.899   | 9.314  | 10.755                  |     |
| GDPD5  | lu1JIXQpIKtFwVKLUQ | rs618202   | 4.94                         | 4.73                 | 0.092                         | 1.81                     | 1.62   | 0.1025 | 8.986                             | 0.567           | 7.839  | 8.575           | 8.899   | 9.314  | 10.755                  |     |
| GDPD5  | lu1JIXQpIKtFwVKLUQ | rs12291026 | 3.99                         | 3.82                 | 0.073                         | 1.49                     | 18.36  | 0.09   | 8.986                             | 0.567           | 7.839  | 8.575           | 8.899   | 9.314  | 10.755                  |     |
| GDPD5  | lu1JIXQpIKtFwVKLUQ | rs10899091 | 3.99                         | 3.82                 | -0.073                        | 1.26                     | 18.93  | 0.09   | 8.986                             | 0.567           | 7.839  | 8.575           | 8.899   | 9.314  | 10.755                  |     |
| GDPD5  | lu1JIXQpIKtFwVKLUQ | rs1938800  | 3.54                         | 3.39                 | -0.067                        | 1.62                     | 19.25  | 0.115  | 8.986                             | 0.567           | 7.839  | 8.575           | 8.899   | 9.314  | 10.755                  |     |
| GFM1   | Nv1IAL6n9UJL3Pfa9I | rs7624934  | 3.65                         | 3.49                 | 0.07                          | 1.05                     | -20.59 | 0.425  | 9.93                              | 0.296           | 8.994  | 9.714           | 9.939   | 10.154 | 10.578                  |     |
| GFM1   | Nv1IAL6n9UJL3Pfa9I | rs9842500  | 3.65                         | 3.49                 | 0.07                          | 1.05                     | -12.08 | 0.425  | 9.93                              | 0.296           | 8.994  | 9.714           | 9.939   | 10.154 | 10.578                  |     |
| GFPT1  | fJS6S7OdMfoS8qCr_U | rs13030665 | 3.45                         | 3.30                 | -0.063                        | 0.99                     | -31.66 | 0.415  | 8.232                             | 0.194           | 7.555  | 8.118           | 8.246   | 8.356  | 8.732                   |     |
| GFPT1  | fJS6S7OdMfoS8qCr_U | rs3923626  | 4.92                         | 4.70                 | 0.097                         | 1.45                     | -27.81 | 0.445  | 8.232                             | 0.194           | 7.555  | 8.118           | 8.246   | 8.356  | 8.732                   |     |
| GFPT1  | fJS6S7OdMfoS8qCr_U | rs10164798 | 8.08                         | 7.72                 | 0.161                         | 2.75                     | 12.94  | 0.4322 | 8.232                             | 0.194           | 7.555  | 8.118           | 8.246   | 8.356  | 8.732                   |     |
| GFPT1  | fJS6S7OdMfoS8qCr_U | rs7586596  | 11.25                        | 10.73                | -0.219                        | 3.29                     | 4.25   | 0.37   | 8.232                             | 0.194           | 7.555  | 8.118           | 8.246   | 8.356  | 8.732                   |     |
| GFPT1  | fJS6S7OdMfoS8qCr_U | rs4581940  | 8.65                         | 8.26                 | 0.171                         | 2.63                     | 41.47  | 0.4422 | 8.232                             | 0.194           | 7.555  | 8.118           | 8.246   | 8.356  | 8.732                   |     |
| GFPT1  | fJS6S7OdMfoS8qCr_U | rs4284873  | 8.34                         | 7.96                 | 0.164                         | 2.59                     | 48.98  | 0.44   | 8.232                             | 0.194           | 7.555  | 8.118           | 8.246   | 8.356  | 8.732                   |     |
| GGH    | ortS6TuiAkXzi6CD_g | rs921833   | 4.15                         | 3.97                 | -0.08                         | 2.78                     | -47.27 | 0.215  | 7.539                             | 0.165           | 7.211  | 7.416           | 7.52    | 7.64   | 8.078                   |     |
| GGH    | ortS6TuiAkXzi6CD_g | rs3780127  | 3.39                         | 3.25                 | -0.063                        | 2.62                     | -10.25 | 0.11   | 7.539                             | 0.165           | 7.211  | 7.416           | 7.52    | 7.64   | 8.078                   |     |
| GGH    | ortS6TuiAkXzi6CD_g | rs13270305 | 4.62                         | 4.42                 | 0.089                         | 1.9                      | -0.15  | 0.24   | 7.539                             | 0.165           | 7.211  | 7.416           | 7.52    | 7.64   | 8.078                   |     |
| GGH    | ortS6TuiAkXzi6CD_g | rs1031551  | 4.13                         | 3.95                 | 0.078                         | 1.72                     | 12.46  | 0.26   | 7.539                             | 0.165           | 7.211  | 7.416           | 7.52    | 7.64   | 8.078                   |     |
| GGNBP2 | Vwv3Op_7fy_bp5kpeU | rs2074103  | 3.55                         | 3.40                 | -0.067                        | 0.89                     | -10.4  | 0.425  | 10.69                             | 0.22            | 10.256 | 10.535          | 10.678  | 10.837 | 11.451                  |     |
| GGLT3  | K6ADqx8ua6QCUBEvEl | rs6119535  | 3.59                         | 3.44                 | -0.065                        | 0.54                     | -6.31  | 0.3775 | 8.118                             | 0.378           | 7.136  | 7.843           | 8.136   | 8.363  | 9.462                   |     |
| GIMAP5 | BjlfF7XV6T7qt6m4R4 | rs2286898  | 3.51                         | 3.37                 | 0.067                         | 2.14                     | 0.24   | 0.33   | 12.828                            | 0.439           | 11.391 | 12.537          | 12.844  | 13.132 | 14.077                  |     |
| GINS2  | irp0SIKOkjrkIBDnhY | rs11865    | 8.27                         | 7.90                 | 0.172                         | 0.94                     | -1.96  | 0.2675 | 7.856                             | 0.287           | 7.25   | 7.678           | 7.806   | 8.014  | 9.179                   |     |
| GINS2  | irp0SIKOkjrkIBDnhY | rs3815795  | 8.66                         | 8.27                 | 0.181                         | 1.05                     | 0.82   | 0.26   | 7.856                             | 0.287           | 7.25   | 7.678           | 7.806   | 8.014  | 9.179                   |     |
| GLRX5  | BhV3kDu0t1AiLNV1QM | rs3742339  | 3.38                         | 3.24                 | 0.065                         | 1.99                     | -1.91  | 0.4296 | 11.813                            | 0.253           | 10.704 | 11.659          | 11.829  | 11.947 | 13.253                  |     |
| GM2A   | 9JKrUKClq6XYTQHl6M | rs10060351 | 6.02                         | 5.75                 | -0.12                         | 1.14                     | -44.78 | 0.0678 | 9.607                             | 0.599           | 8.553  | 9.141           | 9.478   | 9.981  | 11.641                  |     |
| GM2A   | 9JKrUKClq6XYTQHl6M | rs1004736  | 4.5                          | 4.31                 | -0.087                        | 1.73                     | -19.8  | 0.195  | 9.607                             | 0.599           | 8.553  | 9.141           | 9.478   | 9.981  | 11.641                  |     |
| GNA11  | xXWxH2ZF90X.tBpApI | rs308033   | 7.23                         | 6.91                 | 0.145                         | 3                        | 5.45   | 0.26   | 8.682                             | 0.366           | 7.786  | 8.443           | 8.617   | 8.894  | 9.853                   |     |
| GNA11  | xXWxH2ZF90X.tBpApI | rs308052   | 5.22                         | 4.99                 | 0.103                         | 2.52                     | 10.1   | 0.135  | 8.682                             | 0.366           | 7.786  | 8.443           | 8.617   | 8.894  | 9.853                   |     |
| GNA11  | N47iN3hfv0kCwEkdVE | rs2714449  | 3.63                         | 3.47                 | -0.066                        | 1.59                     | 27.81  | 0.21   | 7.14                              | 0.027           | 7.1    | 7.122           | 7.132   | 7.151  | 7.283                   | Yes |
| GNA11  | N47iN3hfv0kCwEkdVE | rs11980616 | 3.61                         | 3.46                 | 0.067                         | 1.02                     | 35.47  | 0.12   | 7.14                              | 0.027           | 7.1    | 7.122           | 7.132   | 7.151  | 7.283                   | Yes |
| GNA11  | N47iN3hfv0kCwEkdVE | rs2886611  | 3.57                         | 3.42                 | 0.063                         | 1.51                     | -5.42  | 0.2286 | 7.14                              | 0.027           | 7.1    | 7.122           | 7.132   | 7.151  | 7.283                   | Yes |
| GNAI3  | fpj49LIRDsBKvrL7x0 | rs1434285  | 4.29                         | 4.11                 | -0.081                        | 0.93                     | -10.49 | 0.185  | 9.001                             | 0.425           | 8.094  | 8.653           | 8.952   | 9.349  | 9.986                   |     |
| GNAI3  | fpj49LIRDsBKvrL7x0 | rs12044778 | 3.94                         | 3.77                 | 0.074                         | 1.03                     | -6.89  | 0.16   | 9.001                             | 0.425           | 8.094  | 8.653           | 8.952   | 9.349  | 9.986                   |     |
| GNAI3  | fpj49LIRDsBKvrL7x0 | rs518076   | 5.21                         | 4.98                 | 0.103                         | 1.22                     | 17.74  | 0.1075 | 9.001                             | 0.425           | 8.094  | 8.653           | 8.952   | 9.349  | 9.986                   |     |
| GNAI3  | fpj49LIRDsBKvrL7x0 | rs7537507  | 4.31                         | 4.13                 | 0.081                         | 1.24                     | -5.87  | 0.16   | 9.001                             | 0.425           | 8.094  | 8.653           | 8.952   | 9.349  | 9.986                   |     |
| GNAI3  | fpj49LIRDsBKvrL7x0 | rs510619   | 5.73                         | 5.48                 | 0.116                         | 1.8                      | 20.39  | 0.16   | 9.001                             | 0.425           | 8.094  | 8.653           | 8.952   | 9.349  | 9.986                   |     |
| GNAI3  | fpj49LIRDsBKvrL7x0 | rs865774   | 4.24                         | 4.06                 | 0.084                         | 1.08                     | 32.22  | 0.165  | 9.001                             | 0.425           | 8.094  | 8.653           | 8.952   | 9.349  | 9.986                   |     |
| GNAL   | 6UCSEYJKlJpJkWJJ8s | rs6505669  | 4.57                         | 4.37                 | 0.089                         | 0.33                     | -29.76 | 0.201  | 7.118                             | 0.012           | 7.096  | 7.11            | 7.117   | 7.125  | 7.163                   |     |
| GNAL   | WaW3ePdX84J5KeGjjo | rs9963456  | 4.38                         | 4.20                 | -0.088                        | 0.02                     | 19.97  | 0.2025 | 7.12                              | 0.017           | 7.096  | 7.109           | 7.116   | 7.127  | 7.224                   |     |
| GNAL   | WaW3ePdX84J5KeGjjo | rs1662609  | 4.89                         | 4.67                 | 0.099                         | 0.05                     | 20.2   | 0.205  | 7.12                              | 0.017           | 7.096  | 7.109           | 7.116   | 7.127  | 7.224                   |     |
| GNAT2  | TCAFKHml33DXRT10o  | rs7544426  | 3.49                         | 3.34                 | 0.062                         | 0.2                      | 20.27  | 0.055  | 7.203                             | 0.072           | 7.115  | 7.145           | 7.184   | 7.242  | 7.487                   |     |
| GNB1L  | c.X.ui5dNEoa4d6qUk | rs2269725  | 6.9                          | 6.60                 | -0.136                        | 2.48                     | 8.79   | 0.115  | 8.571                             | 0.311           | 7.979  | 8.386           | 8.537   | 8.737  | 9.683                   |     |
| GNB1L  | c.X.ui5dNEoa4d6qUk | rs12485220 | 6.4                          | 6.12                 | -0.127                        | 2.48                     | 14.37  | 0.1156 | 8.571                             | 0.311           | 7.979  | 8.386           | 8.537   | 8.737  | 9.683                   |     |
| GNB1L  | c.X.ui5dNEoa4d6qUk | rs7285519  | 3.38                         | 3.24                 | -0.062                        | 0.97                     | -17.31 | 0.3    | 8.571                             | 0.311           | 7.979  | 8.386           | 8.537   | 8.737  | 9.683                   |     |
| GNB5   | 6eddlIHfUieiepEIMI | rs6493534  | 10.05                        | 9.59                 | 0.205                         | 4.32                     | -33.39 | 0.4125 | 7.597                             | 0.282           | 7.142  | 7.378           | 7.521   | 7.804  | 8.346                   | Yes |
| GNB5   | 6eddlIHfUieiepEIMI | rs17650082 | 4.2                          | 4.02                 | 0.081                         | 0.45                     | -21.22 | 0.2925 | 7.597                             | 0.282           | 7.142  | 7.378           | 7.521   | 7.804  | 8.346                   | Yes |
| GNB5   | 6eddlIHfUieiepEIMI | rs2398     | 4.63                         | 4.43                 | -0.089                        | 3.69                     | -5.71  | 0.1475 | 7.597                             | 0.282           | 7.142  | 7.378           | 7.521   | 7.804  | 8.346                   | Yes |
| GNB5   | 6eddlIHfUieiepEIMI | rs2414133  | 20.19                        | 19.24                | 0.377                         | 6.7                      | -0.56  | 0.28   | 7.597                             | 0.282           | 7.142  | 7.378           | 7.521   | 7.804  | 8.346                   | Yes |
| GNB5   | 6eddlIHfUieiepEIMI | rs2899485  | 22.04                        | 21.00                | 0.398                         | 6.2                      | 6.36   | 0.295  | 7.597                             | 0.282           | 7.142  | 7.378           | 7.521   | 7.804  | 8.346                   | Yes |
| GNB5   | 6eddlIHfUieiepEIMI | rs4238384  | 11.87                        | 11.32                | 0.232                         | 7.47                     | 23.21  | 0.1884 | 7.597                             | 0.282           | 7.142  | 7.378           | 7.521   | 7.804  | 8.346                   | Yes |

| Symbol  | Lumi nuID          | SNP        | Population-based association |                  | % Variance Explained | Family-based association |                               | Transcript abundance (log2 scale) |        |                    |         |                 |        |                 | SNP mapping under probe |         |
|---------|--------------------|------------|------------------------------|------------------|----------------------|--------------------------|-------------------------------|-----------------------------------|--------|--------------------|---------|-----------------|--------|-----------------|-------------------------|---------|
|         |                    |            | p-value (-log10)             | p-value (-log10) |                      | p-value (-log10)         | Distance from transcript (kb) | MAF                               | Mean   | Standard Deviation | Minimum | 25th percentile | Median | 75th percentile |                         | Maximum |
| GNB5    | 6eddlIHUieiepEIMI  | rs12909184 | 6.35                         | 6.07             | 0.126                | 4.46                     | -21.55                        | 0.1925                            | 7.597  | 0.282              | 7.142   | 7.378           | 7.521  | 7.804           | 8.346                   | Yes     |
| GNB5    | 6eddlIHUieiepEIMI  | rs10220890 | 8.32                         | 7.95             | -0.167               | 1.31                     | -20.28                        | 0.105                             | 7.597  | 0.282              | 7.142   | 7.378           | 7.521  | 7.804           | 8.346                   | Yes     |
| GNB5    | 6eddlIHUieiepEIMI  | rs12438743 | 6.35                         | 6.07             | 0.126                | 4.7                      | -18.06                        | 0.1925                            | 7.597  | 0.282              | 7.142   | 7.378           | 7.521  | 7.804           | 8.346                   | Yes     |
| GNB5    | 6eddlIHUieiepEIMI  | rs12595160 | 3.83                         | 3.66             | 0.073                | 2.98                     | -8.68                         | 0.1675                            | 7.597  | 0.282              | 7.142   | 7.378           | 7.521  | 7.804           | 8.346                   | Yes     |
| GNB5    | 6eddlIHUieiepEIMI  | rs1063902  | 11.47                        | 10.94            | -0.227               | 7.23                     | 12.79                         | 0.2337                            | 7.597  | 0.282              | 7.142   | 7.378           | 7.521  | 7.804           | 8.346                   | Yes     |
| GNB5    | 6eddlIHUieiepEIMI  | rs1011050  | 14                           | 13.35            | -0.269               | 4.51                     | 30.92                         | 0.345                             | 7.597  | 0.282              | 7.142   | 7.378           | 7.521  | 7.804           | 8.346                   | Yes     |
| GNB5    | 6eddlIHUieiepEIMI  | rs1011051  | 6.54                         | 6.25             | 0.128                | 1.37                     | 31.09                         | 0.305                             | 7.597  | 0.282              | 7.142   | 7.378           | 7.521  | 7.804           | 8.346                   | Yes     |
| GNB5    | 6eddlIHUieiepEIMI  | rs2278295  | 7.48                         | 7.15             | 0.147                | 1.86                     | 31.98                         | 0.285                             | 7.597  | 0.282              | 7.142   | 7.378           | 7.521  | 7.804           | 8.346                   | Yes     |
| GNB5    | 6eddlIHUieiepEIMI  | rs3794550  | 8.49                         | 8.10             | -0.17                | 2.15                     | 33.78                         | 0.1608                            | 7.597  | 0.282              | 7.142   | 7.378           | 7.521  | 7.804           | 8.346                   | Yes     |
| GNB5    | 6eddlIHUieiepEIMI  | rs6493546  | 15.16                        | 14.46            | -0.289               | 4.97                     | 34.49                         | 0.34                              | 7.597  | 0.282              | 7.142   | 7.378           | 7.521  | 7.804           | 8.346                   | Yes     |
| GNB5    | 6eddlIHUieiepEIMI  | rs4405491  | 4.16                         | 3.98             | 0.08                 | 0.6                      | 43.36                         | 0.145                             | 7.597  | 0.282              | 7.142   | 7.378           | 7.521  | 7.804           | 8.346                   | Yes     |
| GNG8    | NB16f3mIZOUCOFZ64Y | rs11083841 | 4.51                         | 4.32             | -0.084               | 1.93                     | -17.3                         | 0.1382                            | 7.474  | 0.269              | 7.126   | 7.261           | 7.412  | 7.651           | 8.963                   |         |
| GNG8    | NB16f3mIZOUCOFZ64Y | rs1126510  | 16.41                        | 15.65            | -0.299               | 8.25                     | -13.55                        | 0.345                             | 7.474  | 0.269              | 7.126   | 7.261           | 7.412  | 7.651           | 8.963                   |         |
| GNG8    | NB16f3mIZOUCOFZ64Y | rs931646   | 3.37                         | 3.23             | -0.062               | 2.06                     | -2.58                         | 0.225                             | 7.474  | 0.269              | 7.126   | 7.261           | 7.412  | 7.651           | 8.963                   |         |
| GNG8    | NB16f3mIZOUCOFZ64Y | rs931647   | 13.25                        | 12.64            | -0.246               | 4.81                     | 5.43                          | 0.3625                            | 7.474  | 0.269              | 7.126   | 7.261           | 7.412  | 7.651           | 8.963                   |         |
| GNLY    | NcStv3iV3Rfte6CCRI | rs1030862  | 3.33                         | 3.19             | 0.062                | 2.36                     | -18.98                        | 0.3625                            | 10.199 | 1.345              | 7.266   | 9.132           | 10.195 | 11.099          | 13.956                  |         |
| GNLY    | NcStv3iV3Rfte6CCRI | rs11887600 | 4.54                         | 4.34             | 0.088                | 1.98                     | -1.79                         | 0.1                               | 10.199 | 1.345              | 7.266   | 9.132           | 10.195 | 11.099          | 13.956                  |         |
| GNLY    | NcStv3iV3Rfte6CCRI | rs11887686 | 4.7                          | 4.50             | -0.091               | 2.18                     | -1.75                         | 0.1005                            | 10.199 | 1.345              | 7.266   | 9.132           | 10.195 | 11.099          | 13.956                  |         |
| GNLY    | NcStv3iV3Rfte6CCRI | rs7577293  | 5.77                         | 5.52             | 0.117                | 3.11                     | 9.4                           | 0.231                             | 10.199 | 1.345              | 7.266   | 9.132           | 10.195 | 11.099          | 13.956                  |         |
| GNMT    | inden4sL1p3XHFRHt4 | rs9471969  | 3.72                         | 3.56             | -0.073               | 3.15                     | -22.12                        | 0.3025                            | 7.343  | 0.132              | 7.128   | 7.258           | 7.317  | 7.409           | 8.049                   |         |
| GNMT    | inden4sL1p3XHFRHt4 | rs9462853  | 3.45                         | 3.31             | 0.067                | 3.1                      | -17.83                        | 0.309                             | 7.343  | 0.132              | 7.128   | 7.258           | 7.317  | 7.409           | 8.049                   |         |
| GNMT    | inden4sL1p3XHFRHt4 | rs6927188  | 3.67                         | 3.52             | -0.075               | 2.32                     | -15.91                        | 0.2888                            | 7.343  | 0.132              | 7.128   | 7.258           | 7.317  | 7.409           | 8.049                   |         |
| GNPTAB  | 0knsQAeVFJSO4VOpTQ | rs10860794 | 3.38                         | 3.23             | -0.059               | 1.09                     | -6.91                         | 0.33                              | 9.783  | 0.287              | 8.3     | 9.637           | 9.794  | 9.942           | 10.96                   |         |
| GOLGB1  | KRoC5eQASK6MYoSvok | rs1492178  | 5.36                         | 5.12             | -0.106               | 3.07                     | -39.45                        | 0.2275                            | 8.777  | 0.422              | 7.131   | 8.49            | 8.776  | 9.067           | 9.929                   |         |
| GOLGB1  | KRoC5eQASK6MYoSvok | rs9841861  | 14.38                        | 13.72            | -0.276               | 4.95                     | -15.24                        | 0.1225                            | 8.777  | 0.422              | 7.131   | 8.49            | 8.776  | 9.067           | 9.929                   |         |
| GOLGB1  | KRoC5eQASK6MYoSvok | rs9849087  | 13.94                        | 13.30            | -0.27                | 4.95                     | -3.38                         | 0.11                              | 8.777  | 0.422              | 7.131   | 8.49            | 8.776  | 9.067           | 9.929                   |         |
| GOLGB1  | KRoC5eQASK6MYoSvok | rs6766694  | 3.54                         | 3.39             | -0.067               | 3.61                     | 32.47                         | 0.3442                            | 8.777  | 0.422              | 7.131   | 8.49            | 8.776  | 9.067           | 9.929                   |         |
| GOLGB1  | KRoC5eQASK6MYoSvok | rs6795182  | 3.54                         | 3.39             | 0.067                | 4.03                     | 37.28                         | 0.3442                            | 8.777  | 0.422              | 7.131   | 8.49            | 8.776  | 9.067           | 9.929                   |         |
| GOSR2   | 6nmUuqFyZKH.rDUwDo | rs197922   | 4.63                         | 4.43             | 0.094                | 2.52                     | 8.08                          | 0.3275                            | 7.384  | 0.153              | 7.117   | 7.268           | 7.37   | 7.477           | 7.856                   | Yes     |
| GOSR2   | cV1IC9EGk6OF0.yOpE | rs197922   | 3.83                         | 3.67             | -0.073               | 0.88                     | 8.08                          | 0.3275                            | 8.343  | 0.192              | 7.472   | 8.23            | 8.366  | 8.463           | 8.823                   |         |
| GOSR2   | cV1IC9EGk6OF0.yOpE | rs3809854  | 3.73                         | 3.57             | -0.07                | 0.51                     | 10.56                         | 0.4475                            | 8.343  | 0.192              | 7.472   | 8.23            | 8.366  | 8.463           | 8.823                   |         |
| GOSR2   | 6nmUuqFyZKH.rDUwDo | rs7214920  | 4.58                         | 4.39             | 0.091                | 3.46                     | 32.4                          | 0.1332                            | 7.384  | 0.153              | 7.117   | 7.268           | 7.37   | 7.477           | 7.856                   | Yes     |
| GPA33   | KE6r16_9eTVjF0leic | rs2281960  | 3.76                         | 3.60             | -0.072               | 1.73                     | -0.04                         | 0.475                             | 9.018  | 0.416              | 7.824   | 8.727           | 9.003  | 9.267           | 10.099                  |         |
| GPA33   | KE6r16_9eTVjF0leic | rs12042641 | 3.49                         | 3.34             | 0.066                | 1.07                     | 5.16                          | 0.34                              | 9.018  | 0.416              | 7.824   | 8.727           | 9.003  | 9.267           | 10.099                  |         |
| GPD1L   | 3NRFCKu_44riruQKgc | rs12106865 | 4.88                         | 4.67             | -0.098               | 2.37                     | -13.54                        | 0.0875                            | 10.486 | 0.282              | 9.629   | 10.337          | 10.493 | 10.673          | 11.119                  |         |
| GPD1L   | 3NRFCKu_44riruQKgc | rs1159444  | 4.13                         | 3.95             | 0.081                | 2.83                     | -1.96                         | 0.1275                            | 10.486 | 0.282              | 9.629   | 10.337          | 10.493 | 10.673          | 11.119                  |         |
| GPD1L   | 3NRFCKu_44riruQKgc | rs748607   | 4.51                         | 4.31             | 0.087                | 2.36                     | 0.57                          | 0.31                              | 10.486 | 0.282              | 9.629   | 10.337          | 10.493 | 10.673          | 11.119                  |         |
| GPD1L   | 3NRFCKu_44riruQKgc | rs13061945 | 4.36                         | 4.17             | 0.083                | 2.26                     | 6.28                          | 0.3125                            | 10.486 | 0.282              | 9.629   | 10.337          | 10.493 | 10.673          | 11.119                  |         |
| GPD1L   | 3NRFCKu_44riruQKgc | rs9861404  | 4.47                         | 4.28             | -0.089               | 2.83                     | -27.01                        | 0.1566                            | 10.486 | 0.282              | 9.629   | 10.337          | 10.493 | 10.673          | 11.119                  |         |
| GPD1L   | 3NRFCKu_44riruQKgc | rs7622177  | 3.57                         | 3.42             | -0.074               | 1.99                     | -15.07                        | 0.3175                            | 10.486 | 0.282              | 9.629   | 10.337          | 10.493 | 10.673          | 11.119                  |         |
| GPD1L   | 3NRFCKu_44riruQKgc | rs17028984 | 6.78                         | 6.48             | 0.135                | 3.37                     | 9.06                          | 0.1125                            | 10.486 | 0.282              | 9.629   | 10.337          | 10.493 | 10.673          | 11.119                  |         |
| GPD1L   | 3NRFCKu_44riruQKgc | rs9842565  | 5.54                         | 5.30             | 0.11                 | 3.29                     | 13.28                         | 0.19                              | 10.486 | 0.282              | 9.629   | 10.337          | 10.493 | 10.673          | 11.119                  |         |
| GPM6A   | KN3SnyJ.MdHX_EiGfc | rs10213204 | 3.39                         | 3.25             | -0.066               | 0.68                     | 47.02                         | 0.1125                            | 7.142  | 0.051              | 7.099   | 7.12            | 7.13   | 7.145           | 7.491                   |         |
| GPM6A   | KN3SnyJ.MdHX_EiGfc | rs10022458 | 3.9                          | 3.74             | 0.076                | 0.7                      | 78.77                         | 0.0625                            | 7.142  | 0.051              | 7.099   | 7.12            | 7.13   | 7.145           | 7.491                   |         |
| GPR103  | urhLrp3f57uepFFU74 | rs17051336 | 4.55                         | 4.35             | -0.093               | 1.02                     | -47.31                        | 0.0625                            | 7.133  | 0.021              | 7.099   | 7.119           | 7.129  | 7.141           | 7.237                   |         |
| GPR137B | Tr0pbK9dCg3fC.5UCE | rs10802285 | 5.8                          | 5.55             | 0.112                | 1.78                     | 6.01                          | 0.27                              | 8.688  | 0.305              | 8.02    | 8.473           | 8.673  | 8.863           | 9.579                   |         |
| GPR160  | x5VeHjJP0g7t.4KnMU | rs16854708 | 3.94                         | 3.77             | -0.075               | 1.35                     | -41.9                         | 0.2275                            | 8.187  | 0.362              | 7.13    | 7.931           | 8.181  | 8.436           | 9.088                   |         |
| GPR160  | x5VeHjJP0g7t.4KnMU | rs6804761  | 4.91                         | 4.70             | 0.101                | 0.65                     | -33.9                         | 0.405                             | 8.187  | 0.362              | 7.13    | 7.931           | 8.181  | 8.436           | 9.088                   |         |
| GPR160  | x5VeHjJP0g7t.4KnMU | rs6771051  | 3.32                         | 3.18             | 0.064                | 1.68                     | -32.48                        | 0.4625                            | 8.187  | 0.362              | 7.13    | 7.931           | 8.181  | 8.436           | 9.088                   |         |
| GPR160  | x5VeHjJP0g7t.4KnMU | rs16854735 | 7.09                         | 6.77             | 0.142                | 4.41                     | -25.93                        | 0.1775                            | 8.187  | 0.362              | 7.13    | 7.931           | 8.181  | 8.436           | 9.088                   |         |
| GPR160  | x5VeHjJP0g7t.4KnMU | rs12636720 | 11.5                         | 10.97            | -0.228               | 4.2                      | -25.68                        | 0.335                             | 8.187  | 0.362              | 7.13    | 7.931           | 8.181  | 8.436           | 9.088                   |         |
| GPR160  | x5VeHjJP0g7t.4KnMU | rs16854744 | 9.06                         | 8.64             | 0.183                | 2.57                     | -21.42                        | 0.2753                            | 8.187  | 0.362              | 7.13    | 7.931           | 8.181  | 8.436           | 9.088                   |         |
| GPR160  | x5VeHjJP0g7t.4KnMU | rs7621777  | 6.75                         | 6.45             | 0.134                | 2.39                     | 21.56                         | 0.3                               | 8.187  | 0.362              | 7.13    | 7.931           | 8.181  | 8.436           | 9.088                   |         |
| GPR160  | x5VeHjJP0g7t.4KnMU | rs2241295  | 5.13                         | 4.91             | -0.101               | 1.42                     | -5.25                         | 0.31                              | 8.187  | 0.362              | 7.13    | 7.931           | 8.181  | 8.436           | 9.088                   |         |
| GPR160  | x5VeHjJP0g7t.4KnMU | rs1352204  | 9.67                         | 9.23             | 0.194                | 3.63                     | 13.33                         | 0.42                              | 8.187  | 0.362              | 7.13    | 7.931           | 8.181  | 8.436           | 9.088                   |         |
| GPR160  | x5VeHjJP0g7t.4KnMU | rs6444898  | 5.24                         | 5.03             | 0.104                | 1.41                     | 28.93                         | 0.3075                            | 8.187  | 0.362              | 7.13    | 7.931           | 8.181  | 8.436           | 9.088                   |         |
| GPR19   | indenl.07J0nOkVU4E | rs10492237 | 13.95                        | 13.30            | -0.265               | 2.66                     | 34.96                         | 0.09                              | 7.851  | 0.234              | 7.31    | 7.693           | 7.82   | 7.982           | 8.655                   |         |
| GPR19   | indenl.07J0nOkVU4E | rs10734854 | 6.26                         | 5.98             | -0.121               | 1.29                     | 44.75                         | 0.25                              | 7.851  | 0.234              | 7.31    | 7.693           | 7.82   | 7.982           | 8.655                   |         |
| GPR19   | indenl.07J0nOkVU4E | rs10845613 | 6.55                         | 6.26             | 0.127                | 1.38                     | 45.01                         | 0.2525                            | 7.851  | 0.234              | 7.31    | 7.693           | 7.82   | 7.982           | 8.655                   |         |
| GPSM2   | Kfd6E5m.iroqtewrn0 | rs12090453 | 3.62                         | 3.47             | -0.068               | 0.28                     | -3.6                          | 0.4075                            | 7.385  | 0.1                | 7.132   | 7.326           | 7.364  | 7.43            | 8.003                   |         |
| GPSM2   | Kfd6E5m.iroqtewrn0 | rs338466   | 3.74                         | 3.58             | -0.069               | 0.04                     | 13.17                         | 0.485                             | 7.385  | 0.1                | 7.132   | 7.326           | 7.364  | 7.43            | 8.003                   |         |
| GPSM2   | Kfd6E5m.iroqtewrn0 | rs865151   | 3.41                         | 3.26             | -0.061               | 0.08                     | 22.85                         | 0.465                             | 7.385  | 0.1                | 7.132   | 7.326           | 7.364  | 7.43            | 8.003                   |         |

| Symbol | Lumi nuID          | SNP        | Population-based association |                           |                      | Family-based association |                               |        | Transcript abundance (log2 scale) |                    |                 |        |                 |         | SNP mapping under probe |     |
|--------|--------------------|------------|------------------------------|---------------------------|----------------------|--------------------------|-------------------------------|--------|-----------------------------------|--------------------|-----------------|--------|-----------------|---------|-------------------------|-----|
|        |                    |            | p-value (-log10)             | p-value (-log10), GC adj. | % Variance Explained | p-value (-log10)         | Distance from transcript (kb) | MAF    | Mean                              | Standard Deviation | 25th percentile | Median | 75th percentile | Maximum |                         |     |
| GPSM2  | Kfd6E5m.iroqtewrn0 | rs12066799 | 3.73                         | 3.57                      | -0.068               | 0.48                     | 46.54                         | 0.4372 | 7.385                             | 0.1                | 7.132           | 7.326  | 7.364           | 7.43    | 8.003                   |     |
| GPX7   | NiJ34UuDRSWMYG35QQ | rs835342   | 5.27                         | 5.04                      | 0.103                | 0.84                     | -4.01                         | 0.49   | 9.749                             | 0.307              | 8.224           | 9.588  | 9.789           | 9.959   | 10.35                   |     |
| GPX7   | NiJ34UuDRSWMYG35QQ | rs6588431  | 3.65                         | 3.50                      | 0.07                 | 0.09                     | -0.46                         | 0.425  | 9.749                             | 0.307              | 8.224           | 9.588  | 9.789           | 9.959   | 10.35                   |     |
| GRAMD3 | 02.s3vpcuhJ7165F3o | rs4358517  | 3.58                         | 3.43                      | 0.067                | 0.59                     | -1.25                         | 0.245  | 8.504                             | 0.369              | 7.725           | 8.241  | 8.522           | 8.737   | 9.845                   |     |
| GRAMD3 | 02.s3vpcuhJ7165F3o | rs1026928  | 3.44                         | 3.30                      | -0.064               | 0.54                     | 1.19                          | 0.2475 | 8.504                             | 0.369              | 7.725           | 8.241  | 8.522           | 8.737   | 9.845                   |     |
| GRAMD3 | 02.s3vpcuhJ7165F3o | rs6895921  | 3.41                         | 3.27                      | -0.064               | 0.73                     | 9.72                          | 0.2425 | 8.504                             | 0.369              | 7.725           | 8.241  | 8.522           | 8.737   | 9.845                   |     |
| GRAMD3 | 02.s3vpcuhJ7165F3o | rs900643   | 3.35                         | 3.21                      | 0.062                | 1.18                     | 26.53                         | 0.2625 | 8.504                             | 0.369              | 7.725           | 8.241  | 8.522           | 8.737   | 9.845                   |     |
| GRAMD3 | 02.s3vpcuhJ7165F3o | rs7714395  | 3.43                         | 3.28                      | 0.065                | 1.04                     | 30.44                         | 0.27   | 8.504                             | 0.369              | 7.725           | 8.241  | 8.522           | 8.737   | 9.845                   |     |
| GRAMD3 | 02.s3vpcuhJ7165F3o | rs1552240  | 3.56                         | 3.41                      | 0.067                | 0.98                     | 31.97                         | 0.2675 | 8.504                             | 0.369              | 7.725           | 8.241  | 8.522           | 8.737   | 9.845                   |     |
| GRAMD4 | 3NpGp3qdVuulJ7L.xQ | rs5767276  | 3.52                         | 3.37                      | -0.063               | 1.32                     | -38.91                        | 0.175  | 8.363                             | 0.306              | 7.451           | 8.208  | 8.347           | 8.52    | 9.63                    |     |
| GRAMD4 | 3NpGp3qdVuulJ7L.xQ | rs5769010  | 3.81                         | 3.65                      | -0.07                | 1.59                     | -29.82                        | 0.325  | 8.363                             | 0.306              | 7.451           | 8.208  | 8.347           | 8.52    | 9.63                    |     |
| GRAMD4 | 3NpGp3qdVuulJ7L.xQ | rs6520049  | 3.76                         | 3.60                      | 0.071                | 1.53                     | -26.35                        | 0.2764 | 8.363                             | 0.306              | 7.451           | 8.208  | 8.347           | 8.52    | 9.63                    |     |
| GRAMD4 | 3NpGp3qdVuulJ7L.xQ | rs9616080  | 3.29                         | 3.15                      | 0.06                 | 0.89                     | -4.49                         | 0.2325 | 8.363                             | 0.306              | 7.451           | 8.208  | 8.347           | 8.52    | 9.63                    |     |
| GRB10  | oxeEs4WN3mX96qakJ4 | rs6948959  | 3.76                         | 3.60                      | -0.072               | 1.2                      | 39.29                         | 0.2525 | 7.42                              | 0.157              | 7.121           | 7.303  | 7.414           | 7.505   | 8.263                   |     |
| GRB10  | oxeEs4WN3mX96qakJ4 | rs2529423  | 4.93                         | 4.72                      | 0.096                | 3.72                     | 54.99                         | 0.1482 | 7.42                              | 0.157              | 7.121           | 7.303  | 7.414           | 7.505   | 8.263                   |     |
| GRB10  | oxeEs4WN3mX96qakJ4 | rs2237461  | 4.9                          | 4.69                      | 0.095                | 3.76                     | -70.37                        | 0.1475 | 7.42                              | 0.157              | 7.121           | 7.303  | 7.414           | 7.505   | 8.263                   |     |
| GRB10  | oxeEs4WN3mX96qakJ4 | rs2715094  | 3.42                         | 3.28                      | -0.065               | 1.21                     | -69.6                         | 0.2487 | 7.42                              | 0.157              | 7.121           | 7.303  | 7.414           | 7.505   | 8.263                   |     |
| GRB10  | oxeEs4WN3mX96qakJ4 | rs2190503  | 5.83                         | 5.58                      | 0.116                | 4.76                     | -57.43                        | 0.14   | 7.42                              | 0.157              | 7.121           | 7.303  | 7.414           | 7.505   | 8.263                   |     |
| GRB10  | oxeEs4WN3mX96qakJ4 | rs2715135  | 3.71                         | 3.55                      | -0.072               | 3.33                     | -49.92                        | 0.392  | 7.42                              | 0.157              | 7.121           | 7.303  | 7.414           | 7.505   | 8.263                   |     |
| GRB10  | oxeEs4WN3mX96qakJ4 | rs933360   | 4.28                         | 4.09                      | 0.083                | 1.52                     | -41.8                         | 0.275  | 7.42                              | 0.157              | 7.121           | 7.303  | 7.414           | 7.505   | 8.263                   |     |
| GRB10  | oxeEs4WN3mX96qakJ4 | rs7794299  | 7.62                         | 7.28                      | 0.149                | 4.17                     | -16.86                        | 0.1825 | 7.42                              | 0.157              | 7.121           | 7.303  | 7.414           | 7.505   | 8.263                   |     |
| GRB10  | oxeEs4WN3mX96qakJ4 | rs1978208  | 8.12                         | 7.76                      | 0.159                | 4.5                      | -14.6                         | 0.185  | 7.42                              | 0.157              | 7.121           | 7.303  | 7.414           | 7.505   | 8.263                   |     |
| GRB10  | oxeEs4WN3mX96qakJ4 | rs6943153  | 5.54                         | 5.30                      | -0.109               | 1.98                     | -8.47                         | 0.3367 | 7.42                              | 0.157              | 7.121           | 7.303  | 7.414           | 7.505   | 8.263                   |     |
| GRB10  | oxeEs4WN3mX96qakJ4 | rs6593140  | 6.46                         | 6.18                      | 0.126                | 3.56                     | -1.92                         | 0.145  | 7.42                              | 0.157              | 7.121           | 7.303  | 7.414           | 7.505   | 8.263                   |     |
| GRB10  | oxeEs4WN3mX96qakJ4 | rs2108350  | 6.46                         | 6.18                      | -0.126               | 3.56                     | 0.12                          | 0.145  | 7.42                              | 0.157              | 7.121           | 7.303  | 7.414           | 7.505   | 8.263                   |     |
| GRB10  | oxeEs4WN3mX96qakJ4 | rs12536500 | 12.71                        | 12.12                     | -0.242               | 5.46                     | 7.98                          | 0.2663 | 7.42                              | 0.157              | 7.121           | 7.303  | 7.414           | 7.505   | 8.263                   |     |
| GRB10  | oxeEs4WN3mX96qakJ4 | rs1019000  | 5.93                         | 5.67                      | -0.116               | 3.19                     | 9.72                          | 0.31   | 7.42                              | 0.157              | 7.121           | 7.303  | 7.414           | 7.505   | 8.263                   |     |
| GRB10  | QVVPuLrW4JEm_FIXAU | rs10486759 | 3.55                         | 3.40                      | 0.07                 | 0.06                     | 40.55                         | 0.0575 | 7.106                             | 0.01               | 7.091           | 7.101  | 7.104           | 7.108   | 7.204                   | Yes |
| GRB10  | oxeEs4WN3mX96qakJ4 | rs10281065 | 5.21                         | 4.98                      | 0.102                | 2.39                     | 29.92                         | 0.2775 | 7.42                              | 0.157              | 7.121           | 7.303  | 7.414           | 7.505   | 8.263                   |     |
| GRB10  | oxeEs4WN3mX96qakJ4 | rs4947861  | 7.87                         | 7.52                      | 0.155                | 4.12                     | 35.84                         | 0.2125 | 7.42                              | 0.157              | 7.121           | 7.303  | 7.414           | 7.505   | 8.263                   |     |
| GRB10  | oxeEs4WN3mX96qakJ4 | rs1014384  | 4.3                          | 4.11                      | -0.082               | 2.65                     | 47.6                          | 0.32   | 7.42                              | 0.157              | 7.121           | 7.303  | 7.414           | 7.505   | 8.263                   |     |
| GRHPR  | WQnsIASyl6KlqCQFuU | rs17502738 | 4.52                         | 4.33                      | -0.091               | 0.33                     | 4.66                          | 0.185  | 8.94                              | 0.268              | 8.252           | 8.751  | 8.917           | 9.126   | 9.711                   |     |
| GRHPR  | WQnsIASyl6KlqCQFuU | rs1571234  | 3.35                         | 3.21                      | -0.064               | 0.19                     | 49.62                         | 0.38   | 8.94                              | 0.268              | 8.252           | 8.751  | 8.917           | 9.126   | 9.711                   |     |
| GRIN3A | 0WdSggaA57fuJOC4Go | rs6479056  | 3.5                          | 3.35                      | 0.064                | 1.54                     | 27.63                         | 0.26   | 7.14                              | 0.041              | 7.099           | 7.123  | 7.133           | 7.145   | 7.568                   |     |
| GRIN3A | 0WdSggaA57fuJOC4Go | rs1415645  | 4.97                         | 4.76                      | 0.094                | 0.8                      | -41.57                        | 0.1658 | 7.14                              | 0.041              | 7.099           | 7.123  | 7.133           | 7.145   | 7.568                   |     |
| GSDM1  | TVw5fVbduue7XxRcKk | rs1007654  | 4.88                         | 4.67                      | 0.097                | 1.73                     | -7.87                         | 0.3425 | 7.206                             | 0.08               | 7.118           | 7.152  | 7.18            | 7.237   | 7.597                   |     |
| GSDM1  | TVw5fVbduue7XxRcKk | rs7219080  | 4.81                         | 4.60                      | 0.096                | 1.66                     | -4.71                         | 0.3417 | 7.206                             | 0.08               | 7.118           | 7.152  | 7.18            | 7.237   | 7.597                   |     |
| GSDM1  | TVw5fVbduue7XxRcKk | rs3902025  | 4.52                         | 4.33                      | 0.09                 | 1.96                     | 0.03                          | 0.402  | 7.206                             | 0.08               | 7.118           | 7.152  | 7.18            | 7.237   | 7.597                   |     |
| GSDML  | 9xS3tdHINIHFNe0Uuo | rs11557467 | 4.87                         | 4.65                      | -0.091               | 2.12                     | -32.21                        | 0.42   | 9.962                             | 0.587              | 8.254           | 9.567  | 9.99            | 10.4    | 11.633                  |     |
| GSDML  | 9xS3tdHINIHFNe0Uuo | rs2872507  | 4.69                         | 4.49                      | 0.088                | 1.56                     | -20.09                        | 0.4    | 9.962                             | 0.587              | 8.254           | 9.567  | 9.99            | 10.4    | 11.633                  |     |
| GSDML  | 9xS3tdHINIHFNe0Uuo | rs8067378  | 5.04                         | 4.82                      | -0.095               | 2.08                     | -9.5                          | 0.4225 | 9.962                             | 0.587              | 8.254           | 9.567  | 9.99            | 10.4    | 11.633                  |     |
| GSDML  | 9xS3tdHINIHFNe0Uuo | rs2305480  | 5.27                         | 5.04                      | 0.099                | 2.01                     | 1.35                          | 0.3825 | 9.962                             | 0.587              | 8.254           | 9.567  | 9.99            | 10.4    | 11.633                  |     |
| GSDML  | 9xS3tdHINIHFNe0Uuo | rs2290400  | 5.64                         | 5.39                      | 0.108                | 2.58                     | 5.39                          | 0.4141 | 9.962                             | 0.587              | 8.254           | 9.567  | 9.99            | 10.4    | 11.633                  |     |
| GSDML  | 9xS3tdHINIHFNe0Uuo | rs7216389  | 4.47                         | 4.28                      | 0.083                | 2.23                     | -3.84                         | 0.4175 | 9.962                             | 0.587              | 8.254           | 9.567  | 9.99            | 10.4    | 11.633                  |     |
| GSDML  | 9xS3tdHINIHFNe0Uuo | rs4795405  | 4.36                         | 4.17                      | -0.081               | 1.8                      | 14.62                         | 0.3675 | 9.962                             | 0.587              | 8.254           | 9.567  | 9.99            | 10.4    | 11.633                  |     |
| GSDML  | 9xS3tdHINIHFNe0Uuo | rs8079416  | 3.29                         | 3.15                      | -0.061               | 1.64                     | 18.92                         | 0.4749 | 9.962                             | 0.587              | 8.254           | 9.567  | 9.99            | 10.4    | 11.633                  |     |
| GSDML  | 9xS3tdHINIHFNe0Uuo | rs3894194  | 3.68                         | 3.53                      | -0.069               | 1.85                     | 48.2                          | 0.4775 | 9.962                             | 0.587              | 8.254           | 9.567  | 9.99            | 10.4    | 11.633                  |     |
| GSR    | ugUohG7pqS6hUyN94A | rs7822088  | 3.36                         | 3.22                      | 0.061                | 1.99                     | -38.24                        | 0.3075 | 8.639                             | 0.223              | 8.036           | 8.499  | 8.612           | 8.792   | 9.45                    | Yes |
| GSR    | ugUohG7pqS6hUyN94A | rs3594     | 8.15                         | 7.78                      | -0.163               | 3.39                     | -0.78                         | 0.3965 | 8.639                             | 0.223              | 8.036           | 8.499  | 8.612           | 8.792   | 9.45                    | Yes |
| GSR    | ugUohG7pqS6hUyN94A | rs2978662  | 4.13                         | 3.96                      | -0.079               | 2.17                     | -15.62                        | 0.205  | 8.639                             | 0.223              | 8.036           | 8.499  | 8.612           | 8.792   | 9.45                    | Yes |
| GSR    | ugUohG7pqS6hUyN94A | rs2278092  | 3.92                         | 3.75                      | 0.074                | 2.09                     | 16.36                         | 0.2075 | 8.639                             | 0.223              | 8.036           | 8.499  | 8.612           | 8.792   | 9.45                    | Yes |
| GSR    | ugUohG7pqS6hUyN94A | rs2956012  | 3.34                         | 3.20                      | 0.062                | 1.59                     | 36.85                         | 0.19   | 8.639                             | 0.223              | 8.036           | 8.499  | 8.612           | 8.792   | 9.45                    | Yes |
| GSTM1  | uoT.ogUhToQUzknqTg | rs11807    | 4.56                         | 4.36                      | -0.088               | 1.18                     | 24.38                         | 0.2    | 7.69                              | 0.789              | 7.098           | 7.112  | 7.121           | 8.346   | 10.175                  |     |
| GSTM1  | Nsj.dtzjfhRbM.iU   | rs11807    | 4.3                          | 4.11                      | -0.084               | 0.95                     | 24.38                         | 0.2    | 8.029                             | 0.76               | 7.096           | 7.422  | 7.724           | 8.688   | 10.296                  | Yes |
| GSTM1  | uoT.ogUhToQUzknqTg | rs11101992 | 5.33                         | 5.09                      | 0.104                | 1.43                     | 30.39                         | 0.23   | 7.69                              | 0.789              | 7.098           | 7.112  | 7.121           | 8.346   | 10.175                  |     |
| GSTM1  | Nsj.dtzjfhRbM.iU   | rs11101992 | 4.91                         | 4.70                      | 0.097                | 1.09                     | 30.39                         | 0.23   | 8.029                             | 0.76               | 7.096           | 7.422  | 7.724           | 8.688   | 10.296                  | Yes |
| GSTM3  | KhEgRIZfHpBef0IVe0 | rs3754446  | 5.72                         | 5.47                      | 0.113                | 0.9                      | -23.31                        | 0.3342 | 8.362                             | 0.675              | 7.148           | 7.882  | 8.477           | 8.809   | 9.8                     |     |
| GSTM3  | KhEgRIZfHpBef0IVe0 | rs929166   | 4.58                         | 4.38                      | -0.089               | 0.39                     | -21.38                        | 0.255  | 8.362                             | 0.675              | 7.148           | 7.882  | 8.477           | 8.809   | 9.8                     |     |
| GSTM3  | KhEgRIZfHpBef0IVe0 | rs11807    | 8.55                         | 8.16                      | -0.17                | 6.6                      | -15.81                        | 0.2    | 8.362                             | 0.675              | 7.148           | 7.882  | 8.477           | 8.809   | 9.8                     |     |
| GSTM3  | KhEgRIZfHpBef0IVe0 | rs11101992 | 11.4                         | 10.87                     | 0.224                | 7.41                     | -9.8                          | 0.23   | 8.362                             | 0.675              | 7.148           | 7.882  | 8.477           | 8.809   | 9.8                     |     |
| GSTM3  | KhEgRIZfHpBef0IVe0 | rs4970774  | 28.66                        | 27.30                     | 0.488                | 6.68                     | -7.73                         | 0.435  | 8.362                             | 0.675              | 7.148           | 7.882  | 8.477           | 8.809   | 9.8                     |     |
| GSTM3  | KhEgRIZfHpBef0IVe0 | rs1927328  | 9.64                         | 9.20                      | 0.193                | 2.1                      | -0.81                         | 0.2764 | 8.362                             | 0.675              | 7.148           | 7.882  | 8.477           | 8.809   | 9.8                     |     |

| Symbol  | Lumi nuID           | SNP        | Population-based association |                  | % Variance Explained | Family-based association |                               | Transcript abundance (log2 scale) |        |                    |                 |        |                 |         | SNP mapping under probe |     |
|---------|---------------------|------------|------------------------------|------------------|----------------------|--------------------------|-------------------------------|-----------------------------------|--------|--------------------|-----------------|--------|-----------------|---------|-------------------------|-----|
|         |                     |            | p-value (-log10)             | p-value (-log10) |                      | p-value (-log10)         | Distance from transcript (kb) | MAF                               | Mean   | Standard Deviation | 25th percentile | Median | 75th percentile | Maximum |                         |     |
| GSTM3   | KhEgRIZfHpBef0IVe0  | rs7483     | 9.09                         | 8.68             | 0.18                 | 2.26                     | 0.2775                        | 8.362                             | 0.675  | 7.148              | 7.882           | 8.477  | 8.809           | 9.8     |                         |     |
| GSTM3   | KhEgRIZfHpBef0IVe0  | rs10735234 | 50.52                        | 48.09            | -0.693               | 13.06                    | -1.1                          | 0.4425                            | 8.362  | 0.675              | 7.148           | 7.882  | 8.477           | 8.809   | 9.8                     |     |
| GSTM3   | KhEgRIZfHpBef0IVe0  | rs2274536  | 11.6                         | 11.07            | 0.231                | 4.34                     | 11.54                         | 0.3015                            | 8.362  | 0.675              | 7.148           | 7.882  | 8.477           | 8.809   | 9.8                     |     |
| GSTM3   | KhEgRIZfHpBef0IVe0  | rs1887546  | 11.63                        | 11.09            | 0.231                | 4.14                     | 12.6                          | 0.3                               | 8.362  | 0.675              | 7.148           | 7.882  | 8.477           | 8.809   | 9.8                     |     |
| GSTM3   | KhEgRIZfHpBef0IVe0  | rs6684608  | 38.23                        | 36.40            | -0.586               | 10.84                    | 13.25                         | 0.4175                            | 8.362  | 0.675              | 7.148           | 7.882  | 8.477           | 8.809   | 9.8                     |     |
| GSTM3   | KhEgRIZfHpBef0IVe0  | rs11591171 | 5.55                         | 5.30             | -0.105               | 3.95                     | 15.07                         | 0.085                             | 8.362  | 0.675              | 7.148           | 7.882  | 8.477           | 8.809   | 9.8                     |     |
| GSTM3   | KhEgRIZfHpBef0IVe0  | rs2094469  | 7.2                          | 6.87             | 0.143                | 3.17                     | 16.51                         | 0.2575                            | 8.362  | 0.675              | 7.148           | 7.882  | 8.477           | 8.809   | 9.8                     |     |
| GSTM3   | KhEgRIZfHpBef0IVe0  | rs3818562  | 8.94                         | 8.53             | -0.18                | 2.42                     | 17.4                          | 0.4625                            | 8.362  | 0.675              | 7.148           | 7.882  | 8.477           | 8.809   | 9.8                     |     |
| GSTM3   | KhEgRIZfHpBef0IVe0  | rs4970779  | 3.56                         | 3.41             | 0.067                | 0.63                     | 20.46                         | 0.3                               | 8.362  | 0.675              | 7.148           | 7.882  | 8.477           | 8.809   | 9.8                     |     |
| GSTM4   | QjkkfdEvXqgilOv76I  | rs1799875  | 7.78                         | 7.43             | -0.158               | 2.62                     | -49.73                        | 0.4925                            | 7.736  | 0.335              | 7.148           | 7.479  | 7.753           | 7.98    | 8.857                   | Yes |
| GSTM4   | rhd3h6hNTd5c16hdRE  | rs1799875  | 4.65                         | 4.45             | -0.091               | 2.74                     | -49.73                        | 0.4925                            | 7.966  | 0.388              | 7.195           | 7.659  | 7.966           | 8.232   | 9.042                   |     |
| GSTM4   | QjkkfdEvXqgilOv76I  | rs865774   | 3.98                         | 3.81             | 0.08                 | 2.41                     | -29.51                        | 0.165                             | 7.736  | 0.335              | 7.148           | 7.479  | 7.753           | 7.98    | 8.857                   | Yes |
| GSTM4   | QjkkfdEvXqgilOv76I  | rs524998   | 6.35                         | 6.07             | -0.126               | 3.68                     | -28.75                        | 0.3                               | 7.736  | 0.335              | 7.148           | 7.479  | 7.753           | 7.98    | 8.857                   | Yes |
| GSTM4   | rhd3h6hNTd5c16hdRE  | rs524998   | 3.96                         | 3.79             | -0.075               | 4.23                     | -28.75                        | 0.3                               | 7.966  | 0.388              | 7.195           | 7.659  | 7.966           | 8.232   | 9.042                   |     |
| GSTM4   | QjkkfdEvXqgilOv76I  | rs2269340  | 5.41                         | 5.18             | -0.108               | 1.05                     | -26.47                        | 0.0825                            | 7.736  | 0.335              | 7.148           | 7.479  | 7.753           | 7.98    | 8.857                   | Yes |
| GSTM4   | rhd3h6hNTd5c16hdRE  | rs2269340  | 5.41                         | 5.17             | -0.107               | 0.65                     | -26.47                        | 0.0825                            | 7.966  | 0.388              | 7.195           | 7.659  | 7.966           | 8.232   | 9.042                   |     |
| GSTM4   | QjkkfdEvXqgilOv76I  | rs7544426  | 3.58                         | 3.43             | 0.068                | 0.75                     | -22.72                        | 0.055                             | 7.736  | 0.335              | 7.148           | 7.479  | 7.753           | 7.98    | 8.857                   | Yes |
| GSTM4   | QjkkfdEvXqgilOv76I  | rs12745189 | 20.67                        | 19.70            | -0.385               | 7.22                     | -12.14                        | 0.5                               | 7.736  | 0.335              | 7.148           | 7.479  | 7.753           | 7.98    | 8.857                   | Yes |
| GSTM4   | rhd3h6hNTd5c16hdRE  | rs12745189 | 11.46                        | 10.93            | -0.226               | 6.94                     | -12.14                        | 0.5                               | 7.966  | 0.388              | 7.195           | 7.659  | 7.966           | 8.232   | 9.042                   |     |
| GSTM4   | QjkkfdEvXqgilOv76I  | rs668413   | 9.54                         | 9.11             | -0.188               | 4.44                     | -2.76                         | 0.365                             | 7.736  | 0.335              | 7.148           | 7.479  | 7.753           | 7.98    | 8.857                   | Yes |
| GSTM4   | rhd3h6hNTd5c16hdRE  | rs668413   | 5.93                         | 5.67             | -0.115               | 4.39                     | -2.76                         | 0.365                             | 7.966  | 0.388              | 7.195           | 7.659  | 7.966           | 8.232   | 9.042                   |     |
| GSTM4   | QjkkfdEvXqgilOv76I  | rs560018   | 6.66                         | 6.36             | -0.133               | 3.67                     | 1.66                          | 0.3175                            | 7.736  | 0.335              | 7.148           | 7.479  | 7.753           | 7.98    | 8.857                   | Yes |
| GSTM4   | rhd3h6hNTd5c16hdRE  | rs560018   | 3.79                         | 3.63             | -0.072               | 4.26                     | 1.66                          | 0.3175                            | 7.966  | 0.388              | 7.195           | 7.659  | 7.966           | 8.232   | 9.042                   |     |
| GSTM4   | QjkkfdEvXqgilOv76I  | rs638820   | 4.67                         | 4.47             | 0.092                | 1.74                     | 5.58                          | 0.4824                            | 7.736  | 0.335              | 7.148           | 7.479  | 7.753           | 7.98    | 8.857                   | Yes |
| GSTT1   | EuJ6gFOV_RbXSS1ECQ  | rs140289   | 4.82                         | 4.61             | -0.094               | 3                        | -39.81                        | 0.2825                            | 7.942  | 0.53               | 7.1             | 7.665  | 7.96            | 8.298   | 9.278                   |     |
| GSTT1   | EuJ6gFOV_RbXSS1ECQ  | rs6004011  | 12.11                        | 11.55            | 0.23                 | 2.5                      | -38.07                        | 0.1575                            | 7.942  | 0.53               | 7.1             | 7.665  | 7.96            | 8.298   | 9.278                   |     |
| GSTT1   | EuJ6gFOV_RbXSS1ECQ  | rs738809   | 15.53                        | 14.81            | -0.293               | 7.02                     | 21.26                         | 0.335                             | 7.942  | 0.53               | 7.1             | 7.665  | 7.96            | 8.298   | 9.278                   |     |
| GTF2E2  | B1eogKZ4m6Tkr.nu8   | rs2979510  | 5.06                         | 4.84             | -0.095               | 2.91                     | -45.83                        | 0.495                             | 10.76  | 0.259              | 9.974           | 10.613 | 10.782          | 10.928  | 11.343                  |     |
| GTF2E2  | B1eogKZ4m6Tkr.nu8   | rs7833529  | 4.89                         | 4.67             | 0.092                | 2.82                     | 19.17                         | 0.4675                            | 10.76  | 0.259              | 9.974           | 10.613 | 10.782          | 10.928  | 11.343                  |     |
| GTF2E2  | B1eogKZ4m6Tkr.nu8   | rs10955031 | 4.06                         | 3.88             | -0.075               | 2.21                     | -39.81                        | 0.305                             | 10.76  | 0.259              | 9.974           | 10.613 | 10.782          | 10.928  | 11.343                  |     |
| GTF2E2  | B1eogKZ4m6Tkr.nu8   | rs7822088  | 4.47                         | 4.28             | 0.084                | 2.47                     | -17.54                        | 0.3075                            | 10.76  | 0.259              | 9.974           | 10.613 | 10.782          | 10.928  | 11.343                  |     |
| GUCY1B2 | BISWFphJfSdYQIRNF8  | rs1328361  | 3.78                         | 3.62             | 0.069                | 2.53                     | 26.09                         | 0.3275                            | 7.14   | 0.063              | 7.096           | 7.111  | 7.119           | 7.141   | 7.683                   |     |
| GUCY1B2 | BISWFphJfSdYQIRNF8  | rs913465   | 3.42                         | 3.27             | -0.061               | 2.69                     | 26.69                         | 0.3266                            | 7.14   | 0.063              | 7.096           | 7.111  | 7.119           | 7.141   | 7.683                   |     |
| GUCY1B2 | BISWFphJfSdYQIRNF8  | rs9568496  | 3.56                         | 3.41             | 0.064                | 2.28                     | 32.9                          | 0.3225                            | 7.14   | 0.063              | 7.096           | 7.111  | 7.119           | 7.141   | 7.683                   |     |
| GUCY1B2 | BISWFphJfSdYQIRNF8  | rs7994990  | 5.01                         | 4.79             | 0.093                | 2.04                     | -33.95                        | 0.2487                            | 7.14   | 0.063              | 7.096           | 7.111  | 7.119           | 7.141   | 7.683                   |     |
| GUCY1B2 | BISWFphJfSdYQIRNF8  | rs7338139  | 6.61                         | 6.32             | -0.126               | 2.41                     | -23.91                        | 0.21                              | 7.14   | 0.063              | 7.096           | 7.111  | 7.119           | 7.141   | 7.683                   |     |
| GUCY1B2 | BISWFphJfSdYQIRNF8  | rs876602   | 5.86                         | 5.60             | 0.113                | 2.15                     | -16.04                        | 0.41                              | 7.14   | 0.063              | 7.096           | 7.111  | 7.119           | 7.141   | 7.683                   |     |
| GUCY1B2 | BISWFphJfSdYQIRNF8  | rs6561611  | 3.34                         | 3.20             | -0.06                | 1.92                     | -1.91                         | 0.4525                            | 7.14   | 0.063              | 7.096           | 7.111  | 7.119           | 7.141   | 7.683                   |     |
| GUCY1B2 | BISWFphJfSdYQIRNF8  | rs9535573  | 10.08                        | 9.61             | -0.19                | 3.62                     | 15.43                         | 0.2975                            | 7.14   | 0.063              | 7.096           | 7.111  | 7.119           | 7.141   | 7.683                   |     |
| GUCY1B2 | BISWFphJfSdYQIRNF8  | rs4942950  | 7.26                         | 6.93             | -0.138               | 1.62                     | 45.49                         | 0.23                              | 7.14   | 0.063              | 7.096           | 7.111  | 7.119           | 7.141   | 7.683                   |     |
| GUCY1B2 | BISWFphJfSdYQIRNF8  | rs4942951  | 6.41                         | 6.12             | 0.12                 | 2.93                     | 45.65                         | 0.3131                            | 7.14   | 0.063              | 7.096           | 7.111  | 7.119           | 7.141   | 7.683                   |     |
| GUF1    | N173QM3vUFHRYwrhbo  | rs6831166  | 7.82                         | 7.47             | 0.149                | 3.85                     | -49.51                        | 0.2175                            | 7.743  | 0.193              | 7.297           | 7.603  | 7.739           | 7.874   | 8.272                   |     |
| GUF1    | N173QM3vUFHRYwrhbo  | rs1979662  | 7.24                         | 6.92             | -0.138               | 1.79                     | -29.92                        | 0.2806                            | 7.743  | 0.193              | 7.297           | 7.603  | 7.739           | 7.874   | 8.272                   |     |
| GUF1    | N173QM3vUFHRYwrhbo  | rs12499960 | 8.03                         | 7.67             | -0.152               | 3.96                     | 6.92                          | 0.2325                            | 7.743  | 0.193              | 7.297           | 7.603  | 7.739           | 7.874   | 8.272                   |     |
| GYPE    | fi4rrDS5d_v0lutcuk  | rs4835305  | 61.17                        | 58.22            | -0.767               | 10.56                    | -47.22                        | 0.2677                            | 7.393  | 0.214              | 7.128           | 7.221  | 7.29            | 7.553   | 8.029                   |     |
| GYPE    | fi4rrDS5d_v0lutcuk  | rs1822841  | 64.48                        | 61.37            | -0.785               | 10.17                    | 15.92                         | 0.2625                            | 7.393  | 0.214              | 7.128           | 7.221  | 7.29            | 7.553   | 8.029                   |     |
| GYPE    | ERIQOowR08PrqY6du8  | rs1822841  | 16.98                        | 16.18            | -0.323               | 4.65                     | 15.92                         | 0.2625                            | 7.135  | 0.04               | 7.098           | 7.111  | 7.121           | 7.141   | 7.336                   |     |
| GZMK    | OqVfewK7fUZZLd6KO   | rs7714681  | 3.56                         | 3.41             | 0.069                | 3.05                     | -28.21                        | 0.4275                            | 11.128 | 0.565              | 9.274           | 10.794 | 11.136          | 11.492  | 12.681                  |     |
| H2AFJ   | ErSisRF3vKKQPPqSVY  | rs11056145 | 3.69                         | 3.53             | 0.073                | 3.69                     | -41.66                        | 0.2575                            | 7.507  | 0.139              | 7.219           | 7.412  | 7.497           | 7.586   | 8.271                   |     |
| H2AFJ   | ErSisRF3vKKQPPqSVY  | rs11056146 | 3.69                         | 3.53             | 0.073                | 1.92                     | -41.62                        | 0.2575                            | 7.507  | 0.139              | 7.219           | 7.412  | 7.497           | 7.586   | 8.271                   |     |
| H2AFJ   | ErSisRF3vKKQPPqSVY  | rs4764121  | 3.69                         | 3.53             | -0.073               | 1.92                     | -35.49                        | 0.2575                            | 7.507  | 0.139              | 7.219           | 7.412  | 7.497           | 7.586   | 8.271                   |     |
| H2AFJ   | ErSisRF3vKKQPPqSVY  | rs1362599  | 4.12                         | 3.94             | 0.081                | 1.5                      | -25.2                         | 0.39                              | 7.507  | 0.139              | 7.219           | 7.412  | 7.497           | 7.586   | 8.271                   |     |
| H2AFJ   | ErSisRF3vKKQPPqSVY  | rs10846059 | 5.58                         | 5.33             | -0.115               | 0.9                      | -7.43                         | 0.1925                            | 7.507  | 0.139              | 7.219           | 7.412  | 7.497           | 7.586   | 8.271                   |     |
| H2AFJ   | ErSisRF3vKKQPPqSVY  | rs11837353 | 5.58                         | 5.33             | 0.115                | 0.9                      | -7.41                         | 0.1925                            | 7.507  | 0.139              | 7.219           | 7.412  | 7.497           | 7.586   | 8.271                   |     |
| H2AFJ   | ErSisRF3vKKQPPqSVY  | rs11614445 | 4.05                         | 3.88             | -0.083               | 0.46                     | 17.83                         | 0.1709                            | 7.507  | 0.139              | 7.219           | 7.412  | 7.497           | 7.586   | 8.271                   |     |
| H2AFJ   | ErSisRF3vKKQPPqSVY  | rs4763397  | 4.64                         | 4.44             | -0.094               | 0.53                     | 47.06                         | 0.1775                            | 7.507  | 0.139              | 7.219           | 7.412  | 7.497           | 7.586   | 8.271                   |     |
| H6PD    | f4okile9X6uiK7qTil  | rs9435168  | 3.68                         | 3.52             | -0.07                | 0.78                     | 0.56                          | 0.392                             | 7.937  | 0.271              | 7.132           | 7.726  | 7.932           | 8.135   | 8.717                   |     |
| HADHA   | Kkjin_VKfdFGuxajPAU | rs7564397  | 3.65                         | 3.49             | -0.07                | 0.3                      | -20.77                        | 0.2625                            | 9.158  | 0.307              | 8.287           | 8.979  | 9.148           | 9.361   | 10.34                   |     |
| HADHA   | Kkjin_VKfdFGuxajPAU | rs4665830  | 4.3                          | 4.12             | -0.085               | 0.42                     | -14.29                        | 0.315                             | 9.158  | 0.307              | 8.287           | 8.979  | 9.148           | 9.361   | 10.34                   |     |
| HADHA   | Kkjin_VKfdFGuxajPAU | rs4665315  | 6.42                         | 6.13             | -0.132               | 0.74                     | 2.53                          | 0.22                              | 9.158  | 0.307              | 8.287           | 8.979  | 9.148           | 9.361   | 10.34                   |     |
| HADHA   | Kkjin_VKfdFGuxajPAU | rs1122972  | 6.42                         | 6.13             | 0.132                | 0.74                     | 5.28                          | 0.22                              | 9.158  | 0.307              | 8.287           | 8.979  | 9.148           | 9.361   | 10.34                   |     |
| HADHA   | Kkjin_VKfdFGuxajPAU | rs962217   | 6.42                         | 6.13             | -0.132               | 0.74                     | 24.77                         | 0.22                              | 9.158  | 0.307              | 8.287           | 8.979  | 9.148           | 9.361   | 10.34                   |     |

| Symbol  | Lumi nuID          | SNP        | Population-based | Population-based          | % Variance | Distance from | MAF    | Mean      | Transcript abundance (log2 scale) |                 |            |            |         | SNP mapping under probe |        |         |
|---------|--------------------|------------|------------------|---------------------------|------------|---------------|--------|-----------|-----------------------------------|-----------------|------------|------------|---------|-------------------------|--------|---------|
|         |                    |            | association      | association               |            |               |        |           | Explained                         | transcript (kb) | Standard   | 25th       | Median  |                         | 75th   | Maximum |
|         |                    |            | p-value (-log10) | p-value (-log10), GC adj. |            |               |        | Deviation | Minimum                           | percentile      | percentile | percentile | Maximum |                         |        |         |
| HADHA   | Kkin_VKfdFGuxajPAU | rs10177371 | 3.66             | 3.50                      | 0.071      | 0.24          | -4.76  | 0.2925    | 9.158                             | 0.307           | 8.287      | 8.979      | 9.148   | 9.361                   | 10.34  |         |
| HADHA   | Kkin_VKfdFGuxajPAU | rs11685458 | 3.66             | 3.50                      | -0.071     | 0.4           | 4.03   | 0.2925    | 9.158                             | 0.307           | 8.287      | 8.979      | 9.148   | 9.361                   | 10.34  |         |
| HAGH    | NpZXkX0mj_qPKd.yse | rs2294618  | 3.38             | 3.24                      | -0.066     | 0.97          | -44.71 | 0.1709    | 10.524                            | 0.272           | 9.987      | 10.345     | 10.488  | 10.676                  | 11.833 |         |
| HAGH    | NpZXkX0mj_qPKd.yse | rs2745170  | 6.93             | 6.62                      | -0.139     | 2.43          | -23.87 | 0.4175    | 10.524                            | 0.272           | 9.987      | 10.345     | 10.488  | 10.676                  | 11.833 |         |
| HAGH    | NpZXkX0mj_qPKd.yse | rs8047464  | 8.56             | 8.17                      | 0.173      | 2.59          | -2.66  | 0.39      | 10.524                            | 0.272           | 9.987      | 10.345     | 10.488  | 10.676                  | 11.833 |         |
| HAGH    | NpZXkX0mj_qPKd.yse | rs1028590  | 6.67             | 6.38                      | -0.134     | 2.2           | -1.03  | 0.4125    | 10.524                            | 0.272           | 9.987      | 10.345     | 10.488  | 10.676                  | 11.833 |         |
| HAGH    | NpZXkX0mj_qPKd.yse | rs13332303 | 7.29             | 6.96                      | -0.146     | 2.78          | 8.47   | 0.1575    | 10.524                            | 0.272           | 9.987      | 10.345     | 10.488  | 10.676                  | 11.833 |         |
| HAGH    | NpZXkX0mj_qPKd.yse | rs12325218 | 4.28             | 4.09                      | -0.09      | 1.14          | 9.82   | 0.1375    | 10.524                            | 0.272           | 9.987      | 10.345     | 10.488  | 10.676                  | 11.833 |         |
| HAGH    | NpZXkX0mj_qPKd.yse | rs12325282 | 4.28             | 4.09                      | -0.09      | 1.14          | 9.85   | 0.1375    | 10.524                            | 0.272           | 9.987      | 10.345     | 10.488  | 10.676                  | 11.833 |         |
| HAGH    | NpZXkX0mj_qPKd.yse | rs9806945  | 4.07             | 3.89                      | 0.086      | 1.05          | 17.8   | 0.1301    | 10.524                            | 0.272           | 9.987      | 10.345     | 10.488  | 10.676                  | 11.833 |         |
| HAGH    | NpZXkX0mj_qPKd.yse | rs7200137  | 8.83             | 8.43                      | -0.178     | 2.3           | 24.05  | 0.3625    | 10.524                            | 0.272           | 9.987      | 10.345     | 10.488  | 10.676                  | 11.833 |         |
| HAGH    | NpZXkX0mj_qPKd.yse | rs1657117  | 4.28             | 4.09                      | 0.09       | 1.14          | 26.49  | 0.1375    | 10.524                            | 0.272           | 9.987      | 10.345     | 10.488  | 10.676                  | 11.833 |         |
| HAGH    | NpZXkX0mj_qPKd.yse | rs1742429  | 4.28             | 4.09                      | -0.09      | 1.27          | 27.84  | 0.1375    | 10.524                            | 0.272           | 9.987      | 10.345     | 10.488  | 10.676                  | 11.833 |         |
| HAGH    | NpZXkX0mj_qPKd.yse | rs10500323 | 8.01             | 7.65                      | -0.16      | 3.05          | 30.4   | 0.155     | 10.524                            | 0.272           | 9.987      | 10.345     | 10.488  | 10.676                  | 11.833 |         |
| HAGH    | NpZXkX0mj_qPKd.yse | rs1657125  | 7.7              | 7.36                      | -0.155     | 3.46          | 38.86  | 0.1575    | 10.524                            | 0.272           | 9.987      | 10.345     | 10.488  | 10.676                  | 11.833 |         |
| HAGH    | NpZXkX0mj_qPKd.yse | rs173164   | 4.94             | 4.73                      | 0.104      | 1.59          | 48.12  | 0.135     | 10.524                            | 0.272           | 9.987      | 10.345     | 10.488  | 10.676                  | 11.833 |         |
| HAGHL   | oKcK3qh5u_p4uJN3p8 | rs12448432 | 4.18             | 4.00                      | -0.081     | 2.07          | -0.9   | 0.215     | 7.461                             | 0.218           | 7.149      | 7.315      | 7.405   | 7.546                   | 8.326  |         |
| HAK     | iUeu3DGc_Wiur3uG4  | rs4940733  | 5.08             | 4.85                      | -0.098     | 1.43          | 49.71  | 0.3945    | 7.306                             | 0.119           | 7.142      | 7.22       | 7.282   | 7.373                   | 7.959  |         |
| HCG27   | ikRuRUghZUGTn5ywRc | rs3130933  | 4.08             | 3.91                      | -0.075     | 0.92          | -33.45 | 0.145     | 8.186                             | 0.403           | 7.374      | 7.885      | 8.149   | 8.443                   | 10.019 | Yes     |
| HCG27   | ikRuRUghZUGTn5ywRc | rs3130931  | 5.07             | 4.85                      | -0.098     | 1.49          | -30.65 | 0.28      | 8.186                             | 0.403           | 7.374      | 7.885      | 8.149   | 8.443                   | 10.019 | Yes     |
| HCG27   | ikRuRUghZUGTn5ywRc | rs3130501  | 4.76             | 4.55                      | 0.092      | 1.63          | -29.08 | 0.235     | 8.186                             | 0.403           | 7.374      | 7.885      | 8.149   | 8.443                   | 10.019 | Yes     |
| HCG27   | ikRuRUghZUGTn5ywRc | rs879882   | 3.29             | 3.15                      | -0.062     | 1.12          | -28.09 | 0.36      | 8.186                             | 0.403           | 7.374      | 7.885      | 8.149   | 8.443                   | 10.019 | Yes     |
| HCG27   | ikRuRUghZUGTn5ywRc | rs3094188  | 4.88             | 4.67                      | -0.093     | 1.94          | -23.29 | 0.37      | 8.186                             | 0.403           | 7.374      | 7.885      | 8.149   | 8.443                   | 10.019 | Yes     |
| HCG27   | ikRuRUghZUGTn5ywRc | rs3094609  | 5.73             | 5.47                      | -0.111     | 1.55          | 0.03   | 0.165     | 8.186                             | 0.403           | 7.374      | 7.885      | 8.149   | 8.443                   | 10.019 | Yes     |
| HCG27   | ikRuRUghZUGTn5ywRc | rs9263870  | 3.67             | 3.52                      | 0.066      | 0.91          | -1.23  | 0.1025    | 8.186                             | 0.403           | 7.374      | 7.885      | 8.149   | 8.443                   | 10.019 | Yes     |
| HCG27   | ikRuRUghZUGTn5ywRc | rs2894181  | 4.1              | 3.92                      | 0.075      | 2.6           | 2.78   | 0.5       | 8.186                             | 0.403           | 7.374      | 7.885      | 8.149   | 8.443                   | 10.019 | Yes     |
| HCG27   | ikRuRUghZUGTn5ywRc | rs3869109  | 3.38             | 3.24                      | 0.061      | 1.76          | 12.45  | 0.425     | 8.186                             | 0.403           | 7.374      | 7.885      | 8.149   | 8.443                   | 10.019 | Yes     |
| HCG27   | ikRuRUghZUGTn5ywRc | rs9263969  | 4.61             | 4.41                      | 0.087      | 2.24          | 14.79  | 0.2375    | 8.186                             | 0.403           | 7.374      | 7.885      | 8.149   | 8.443                   | 10.019 | Yes     |
| HCG27   | ikRuRUghZUGTn5ywRc | rs3130532  | 5.73             | 5.47                      | 0.111      | 1.78          | 36.71  | 0.165     | 8.186                             | 0.403           | 7.374      | 7.885      | 8.149   | 8.443                   | 10.019 | Yes     |
| HCLS1   | Qu9eHX1Q4EXd5RVcd4 | rs1492178  | 3.42             | 3.28                      | -0.066     | 0.88          | -6.75  | 0.2275    | 13.099                            | 0.367           | 11.854     | 12.928     | 13.134  | 13.276                  | 14.521 |         |
| HDDC2   | HSgmtOAUU6OBHorpLk | rs3823219  | 4.14             | 3.96                      | -0.081     | 2.61          | -26.63 | 0.475     | 11.747                            | 0.233           | 10.458     | 11.619     | 11.759  | 11.895                  | 12.317 |         |
| HDDC2   | HSgmtOAUU6OBHorpLk | rs3799732  | 4.98             | 4.76                      | 0.099      | 2.11          | -21.99 | 0.37      | 11.747                            | 0.233           | 10.458     | 11.619     | 11.759  | 11.895                  | 12.317 |         |
| HDDC2   | HSgmtOAUU6OBHorpLk | rs2318095  | 5.4              | 5.17                      | -0.108     | 2.25          | -2.68  | 0.2663    | 11.747                            | 0.233           | 10.458     | 11.619     | 11.759  | 11.895                  | 12.317 |         |
| HDDC2   | HSgmtOAUU6OBHorpLk | rs12523848 | 6.42             | 6.14                      | 0.129      | 2.67          | 0.68   | 0.265     | 11.747                            | 0.233           | 10.458     | 11.619     | 11.759  | 11.895                  | 12.317 |         |
| HDGFRP3 | 6wJ6DSQSVzqAUhAk_E | rs4531702  | 5.35             | 5.12                      | -0.104     | 3.75          | 41.06  | 0.225     | 7.29                              | 0.212           | 7.099      | 7.132      | 7.209   | 7.373                   | 8.293  |         |
| HDHD3   | QJ3oX9Vd1eaX_0XHUM | rs3747815  | 4.16             | 3.98                      | -0.082     | 1.06          | -0.67  | 0.275     | 8.953                             | 0.321           | 7.913      | 8.76       | 8.957   | 9.163                   | 9.796  |         |
| HDHD3   | QJ3oX9Vd1eaX_0XHUM | rs3747816  | 4.72             | 4.52                      | -0.094     | 0.91          | -0.33  | 0.2125    | 8.953                             | 0.321           | 7.913      | 8.76       | 8.957   | 9.163                   | 9.796  |         |
| HDHD3   | QJ3oX9Vd1eaX_0XHUM | rs16936474 | 6.66             | 6.36                      | 0.133      | 2.51          | 1.49   | 0.145     | 8.953                             | 0.321           | 7.913      | 8.76       | 8.957   | 9.163                   | 9.796  |         |
| HEBP1   | QeYyFIANekn.dSk3q0 | rs3782567  | 3.8              | 3.64                      | -0.072     | 1.62          | -7.61  | 0.4575    | 9.05                              | 0.297           | 8.309      | 8.846      | 9.029   | 9.242                   | 10.059 |         |
| HEBP1   | QeYyFIANekn.dSk3q0 | rs1291362  | 4.21             | 4.03                      | -0.08      | 1.66          | 1.69   | 0.3775    | 9.05                              | 0.297           | 8.309      | 8.846      | 9.029   | 9.242                   | 10.059 |         |
| HEBP1   | QeYyFIANekn.dSk3q0 | rs1291361  | 4.26             | 4.08                      | -0.081     | 1.77          | 1.94   | 0.38      | 9.05                              | 0.297           | 8.309      | 8.846      | 9.029   | 9.242                   | 10.059 |         |
| HEBP1   | QeYyFIANekn.dSk3q0 | rs1291357  | 4.26             | 4.08                      | -0.081     | 1.71          | 4.7    | 0.38      | 9.05                              | 0.297           | 8.309      | 8.846      | 9.029   | 9.242                   | 10.059 |         |
| HECTD2  | KfnOFkxVBSSD31Kuig | rs6583769  | 4.1              | 3.93                      | 0.079      | 2             | -24.66 | 0.0775    | 7.132                             | 0.023           | 7.103      | 7.119      | 7.128   | 7.139                   | 7.28   |         |
| HECTD2  | KfnOFkxVBSSD31Kuig | rs6583776  | 4.69             | 4.49                      | 0.09       | 1.85          | 49.14  | 0.065     | 7.132                             | 0.023           | 7.103      | 7.119      | 7.128   | 7.139                   | 7.28   |         |
| HECTD2  | KfnOFkxVBSSD31Kuig | rs7478184  | 4.69             | 4.49                      | -0.09      | 1.85          | -4.55  | 0.065     | 7.132                             | 0.023           | 7.103      | 7.119      | 7.128   | 7.139                   | 7.28   |         |
| HECTD2  | KfnOFkxVBSSD31Kuig | rs11186596 | 4.69             | 4.49                      | -0.09      | 1.85          | -0.73  | 0.065     | 7.132                             | 0.023           | 7.103      | 7.119      | 7.128   | 7.139                   | 7.28   |         |
| HECW1   | fX0VMsNdeqSATBFUCk | rs10261813 | 3.62             | 3.46                      | -0.069     | 1.7           | 81.67  | 0.305     | 7.133                             | 0.02            | 7.102      | 7.117      | 7.131   | 7.145                   | 7.206  |         |
| HECW2   | 6eoV0IoMUfO8R15HAo | rs6738407  | 6.51             | 6.22                      | -0.115     | 5.98          | 79.65  | 0.2       | 7.155                             | 0.075           | 7.1        | 7.116      | 7.133   | 7.164                   | 7.812  |         |
| HECW2   | 6eoV0IoMUfO8R15HAo | rs4850694  | 7.73             | 7.39                      | 0.136      | 6             | 85.52  | 0.275     | 7.155                             | 0.075           | 7.1        | 7.116      | 7.133   | 7.164                   | 7.812  |         |
| HECW2   | 6eoV0IoMUfO8R15HAo | rs4850695  | 9.9              | 9.45                      | 0.176      | 6.99          | 89.28  | 0.2312    | 7.155                             | 0.075           | 7.1        | 7.116      | 7.133   | 7.164                   | 7.812  |         |
| HECW2   | 6eoV0IoMUfO8R15HAo | rs16849064 | 9.62             | 9.18                      | 0.171      | 6.33          | 89.9   | 0.215     | 7.155                             | 0.075           | 7.1        | 7.116      | 7.133   | 7.164                   | 7.812  |         |
| HECW2   | 6eoV0IoMUfO8R15HAo | rs1531115  | 10.49            | 10.01                     | -0.185     | 7.16          | 91.71  | 0.2275    | 7.155                             | 0.075           | 7.1        | 7.116      | 7.133   | 7.164                   | 7.812  |         |
| HECW2   | 6eoV0IoMUfO8R15HAo | rs13394918 | 3.61             | 3.46                      | 0.061      | 2.12          | 100.97 | 0.2424    | 7.155                             | 0.075           | 7.1        | 7.116      | 7.133   | 7.164                   | 7.812  |         |
| HECW2   | 6eoV0IoMUfO8R15HAo | rs2124384  | 3.84             | 3.67                      | -0.065     | 4.87          | 105.21 | 0.21      | 7.155                             | 0.075           | 7.1        | 7.116      | 7.133   | 7.164                   | 7.812  |         |
| HECW2   | 6eoV0IoMUfO8R15HAo | rs2305567  | 4.17             | 3.99                      | 0.071      | 5.86          | 108.84 | 0.24      | 7.155                             | 0.075           | 7.1        | 7.116      | 7.133   | 7.164                   | 7.812  |         |
| HECW2   | 6eoV0IoMUfO8R15HAo | rs6713102  | 3.69             | 3.53                      | -0.062     | 3.47          | 110.41 | 0.28      | 7.155                             | 0.075           | 7.1        | 7.116      | 7.133   | 7.164                   | 7.812  |         |
| HECW2   | 6eoV0IoMUfO8R15HAo | rs7558876  | 4.67             | 4.46                      | 0.081      | 5.85          | 111.97 | 0.2325    | 7.155                             | 0.075           | 7.1        | 7.116      | 7.133   | 7.164                   | 7.812  |         |
| HECW2   | 6eoV0IoMUfO8R15HAo | rs6725009  | 5.85             | 5.60                      | 0.103      | 6.17          | 126.84 | 0.23      | 7.155                             | 0.075           | 7.1        | 7.116      | 7.133   | 7.164                   | 7.812  |         |
| HECW2   | 6eoV0IoMUfO8R15HAo | rs6751602  | 5.1              | 4.88                      | 0.089      | 3.84          | 154.89 | 0.195     | 7.155                             | 0.075           | 7.1        | 7.116      | 7.133   | 7.164                   | 7.812  |         |
| HECW2   | 6eoV0IoMUfO8R15HAo | rs16850209 | 5.1              | 4.88                      | 0.089      | 3.84          | 156.04 | 0.195     | 7.155                             | 0.075           | 7.1        | 7.116      | 7.133   | 7.164                   | 7.812  |         |
| HECW2   | 6eoV0IoMUfO8R15HAo | rs3849360  | 5.19             | 4.96                      | -0.091     | 5.53          | 160.43 | 0.2425    | 7.155                             | 0.075           | 7.1        | 7.116      | 7.133   | 7.164                   | 7.812  |         |
| HECW2   | 6eoV0IoMUfO8R15HAo | rs1113321  | 5.54             | 5.30                      | 0.097      | 5.58          | 169.72 | 0.2375    | 7.155                             | 0.075           | 7.1        | 7.116      | 7.133   | 7.164                   | 7.812  |         |

| Symbol    | Lumi nuID          | SNP        | Population-based             | Population-based                      | % Variance Explained | Family-based                 | Distance from transcript (kb) | MAF    | Mean   | Transcript abundance (log2 scale) |         |                 |        |                 | SNP mapping under probe |
|-----------|--------------------|------------|------------------------------|---------------------------------------|----------------------|------------------------------|-------------------------------|--------|--------|-----------------------------------|---------|-----------------|--------|-----------------|-------------------------|
|           |                    |            | association p-value (-log10) | association p-value (-log10), GC adj. |                      | association p-value (-log10) |                               |        |        | Standard Deviation                | Minimum | 25th percentile | Median | 75th percentile |                         |
| HECW2     | 6eoV0IoMUfO8R15HAo | rs6749624  | 4.04                         | 3.87                                  | -0.07                | 2.42                         | 172.24                        | 0.11   | 7.155  | 0.075                             | 7.1     | 7.116           | 7.133  | 7.164           | 7.812                   |
| HECW2     | 6eoV0IoMUfO8R15HAo | rs13427710 | 3.84                         | 3.68                                  | 0.067                | 0.87                         | 190.96                        | 0.12   | 7.155  | 0.075                             | 7.1     | 7.116           | 7.133  | 7.164           | 7.812                   |
| HECW2     | 6eoV0IoMUfO8R15HAo | rs13428141 | 3.84                         | 3.68                                  | -0.067               | 0.87                         | 191.18                        | 0.12   | 7.155  | 0.075                             | 7.1     | 7.116           | 7.133  | 7.164           | 7.812                   |
| HECW2     | 6eoV0IoMUfO8R15HAo | rs6735220  | 3.77                         | 3.61                                  | -0.065               | 1.76                         | 191.51                        | 0.1675 | 7.155  | 0.075                             | 7.1     | 7.116           | 7.133  | 7.164           | 7.812                   |
| HECW2     | 6eoV0IoMUfO8R15HAo | rs7587067  | 4.59                         | 4.39                                  | 0.079                | 2.87                         | 195.27                        | 0.2975 | 7.155  | 0.075                             | 7.1     | 7.116           | 7.133  | 7.164           | 7.812                   |
| HECW2     | 6eoV0IoMUfO8R15HAo | rs1406218  | 3.41                         | 3.27                                  | 0.057                | 2.66                         | -161.58                       | 0.3116 | 7.155  | 0.075                             | 7.1     | 7.116           | 7.133  | 7.164           | 7.812                   |
| HECW2     | 6eoV0IoMUfO8R15HAo | rs17244073 | 3.95                         | 3.78                                  | 0.069                | 1.11                         | -106.18                       | 0.1025 | 7.155  | 0.075                             | 7.1     | 7.116           | 7.133  | 7.164           | 7.812                   |
| HECW2     | 6eoV0IoMUfO8R15HAo | rs6719725  | 3.54                         | 3.39                                  | -0.061               | 1.93                         | -42.43                        | 0.1625 | 7.155  | 0.075                             | 7.1     | 7.116           | 7.133  | 7.164           | 7.812                   |
| HERC2     | fW46g4S4grWxUzUgR4 | rs8039195  | 4.01                         | 3.84                                  | -0.073               | 1.05                         | -51.21                        | 0.105  | 8.525  | 0.344                             | 7.84    | 8.267           | 8.485  | 8.753           | 9.57                    |
| HERC4     | NINS1EornizdUv1TE  | rs2894058  | 3.41                         | 3.27                                  | -0.062               | 1.5                          | 36.31                         | 0.2725 | 9.926  | 0.294                             | 8.634   | 9.827           | 9.97   | 10.088          | 10.499                  |
| HES6      | QnkeVInuOd7E37_yRE | rs7584376  | 5                            | 4.78                                  | 0.102                | 2.48                         | -12.85                        | 0.305  | 7.576  | 0.209                             | 7.144   | 7.432           | 7.562  | 7.73            | 8.1                     |
| HES6      | QnkeVInuOd7E37_yRE | rs7572392  | 5.02                         | 4.80                                  | 0.104                | 2.45                         | -12.77                        | 0.303  | 7.576  | 0.209                             | 7.144   | 7.432           | 7.562  | 7.73            | 8.1                     |
| HES6      | QnkeVInuOd7E37_yRE | rs3795902  | 4.86                         | 4.65                                  | 0.099                | 2.43                         | -10.77                        | 0.3025 | 7.576  | 0.209                             | 7.144   | 7.432           | 7.562  | 7.73            | 8.1                     |
| HES6      | QnkeVInuOd7E37_yRE | rs11694250 | 5.21                         | 4.98                                  | -0.106               | 3.07                         | -8.65                         | 0.31   | 7.576  | 0.209                             | 7.144   | 7.432           | 7.562  | 7.73            | 8.1                     |
| HIBCH     | Esk6vpDcSTupQNSXnk | rs4853684  | 5.51                         | 5.27                                  | -0.11                | 2.78                         | -6.41                         | 0.205  | 9.308  | 0.202                             | 8.581   | 9.187           | 9.323  | 9.444           | 9.839                   |
| HIBCH     | Esk6vpDcSTupQNSXnk | rs6753459  | 5.79                         | 5.53                                  | -0.115               | 3.15                         | -4.61                         | 0.23   | 9.308  | 0.202                             | 8.581   | 9.187           | 9.323  | 9.444           | 9.839                   |
| HIBCH     | Esk6vpDcSTupQNSXnk | rs11692448 | 5.9                          | 5.64                                  | 0.119                | 3.03                         | 42.88                         | 0.2085 | 9.308  | 0.202                             | 8.581   | 9.187           | 9.323  | 9.444           | 9.839                   |
| HIBCH     | Esk6vpDcSTupQNSXnk | rs2582762  | 6.59                         | 6.29                                  | 0.133                | 2.86                         | -55.72                        | 0.2298 | 9.308  | 0.202                             | 8.581   | 9.187           | 9.323  | 9.444           | 9.839                   |
| HIBCH     | Esk6vpDcSTupQNSXnk | rs2664253  | 8.05                         | 7.69                                  | -0.161               | 3.49                         | -36                           | 0.39   | 9.308  | 0.202                             | 8.581   | 9.187           | 9.323  | 9.444           | 9.839                   |
| HIBCH     | Esk6vpDcSTupQNSXnk | rs1058180  | 6.51                         | 6.22                                  | -0.13                | 2.91                         | -22.94                        | 0.2325 | 9.308  | 0.202                             | 8.581   | 9.187           | 9.323  | 9.444           | 9.839                   |
| HIBCH     | Esk6vpDcSTupQNSXnk | rs291458   | 7.97                         | 7.61                                  | 0.159                | 3.28                         | -3.08                         | 0.3825 | 9.308  | 0.202                             | 8.581   | 9.187           | 9.323  | 9.444           | 9.839                   |
| HIBCH     | Esk6vpDcSTupQNSXnk | rs291460   | 7.97                         | 7.61                                  | -0.159               | 3.28                         | -2.97                         | 0.3825 | 9.308  | 0.202                             | 8.581   | 9.187           | 9.323  | 9.444           | 9.839                   |
| HIBCH     | Esk6vpDcSTupQNSXnk | rs291429   | 8.24                         | 7.87                                  | -0.165               | 3.57                         | 13.38                         | 0.3875 | 9.308  | 0.202                             | 8.581   | 9.187           | 9.323  | 9.444           | 9.839                   |
| HIBCH     | Esk6vpDcSTupQNSXnk | rs2067417  | 4.33                         | 4.15                                  | -0.083               | 1.9                          | 42.33                         | 0.2925 | 9.308  | 0.202                             | 8.581   | 9.187           | 9.323  | 9.444           | 9.839                   |
| HIBCH     | Esk6vpDcSTupQNSXnk | rs2067418  | 6.67                         | 6.38                                  | 0.134                | 2.94                         | 42.37                         | 0.23   | 9.308  | 0.202                             | 8.581   | 9.187           | 9.323  | 9.444           | 9.839                   |
| HIBCH     | Esk6vpDcSTupQNSXnk | rs10931450 | 6.57                         | 6.28                                  | 0.131                | 2.74                         | 46.94                         | 0.24   | 9.308  | 0.202                             | 8.581   | 9.187           | 9.323  | 9.444           | 9.839                   |
| HIGD2A    | uKV07Z6oolHx_7B7BY | rs1065212  | 7.71                         | 7.36                                  | 0.153                | 1.91                         | -4.65                         | 0.0725 | 12.388 | 0.255                             | 11.278  | 12.248          | 12.415 | 12.584          | 13.2                    |
| HIGD2A    | uKV07Z6oolHx_7B7BY | rs1065206  | 4.04                         | 3.86                                  | -0.078               | 1.38                         | -4.55                         | 0.055  | 12.388 | 0.255                             | 11.278  | 12.248          | 12.415 | 12.584          | 13.2                    |
| IIST1H2BD | i7o1RUDUHTXr_eRHr0 | rs806973   | 3.95                         | 3.78                                  | -0.078               | 0.99                         | -10.02                        | 0.3838 | 8.012  | 0.387                             | 7.208   | 7.732           | 7.963  | 8.177           | 9.903                   |
| IIST1H2BD | i7o1RUDUHTXr_eRHr0 | rs1009181  | 3.7                          | 3.54                                  | 0.071                | 0.85                         | 0.64                          | 0.3675 | 8.012  | 0.387                             | 7.208   | 7.732           | 7.963  | 8.177           | 9.903                   |
| HKDC1     | Z4LNSVSRkiK_PIKIR4 | rs5030938  | 3.56                         | 3.46                                  | -0.068               | 1.6                          | -4.14                         | 0.3375 | 8.798  | 0.401                             | 7.567   | 8.576           | 8.815  | 9.015           | 10.014                  |
| HKDC1     | Z4LNSVSRkiK_PIKIR4 | rs953724   | 3.51                         | 3.31                                  | -0.064               | 1.39                         | 1.16                          | 0.36   | 8.798  | 0.401                             | 7.567   | 8.576           | 8.815  | 9.015           | 10.014                  |
| HKDC1     | Z4LNSVSRkiK_PIKIR4 | rs9645499  | 4.68                         | 4.47                                  | 0.089                | 1.36                         | 6.55                          | 0.46   | 8.798  | 0.401                             | 7.567   | 8.576           | 8.815  | 9.015           | 10.014                  |
| HKDC1     | Z4LNSVSRkiK_PIKIR4 | rs1983127  | 3.57                         | 3.42                                  | 0.068                | 1.09                         | 9.84                          | 0.375  | 8.798  | 0.401                             | 7.567   | 8.576           | 8.815  | 9.015           | 10.014                  |
| HLA-DOB   | Qd31eNfoolYHj3one4 | rs2857210  | 8.35                         | 7.98                                  | -0.167               | 3.75                         | -38.81                        | 0.3191 | 7.987  | 0.494                             | 7.197   | 7.614           | 7.904  | 8.221           | 9.681                   |
| HLA-DOB   | Qd31eNfoolYHj3one4 | rs9276615  | 7.2                          | 6.87                                  | -0.142               | 3.54                         | -37.33                        | 0.3175 | 7.987  | 0.494                             | 7.197   | 7.614           | 7.904  | 8.221           | 9.681                   |
| HLA-DOB   | Qd31eNfoolYHj3one4 | rs13195441 | 4.4                          | 4.21                                  | 0.082                | 2.24                         | -37.25                        | 0.28   | 7.987  | 0.494                             | 7.197   | 7.614           | 7.904  | 8.221           | 9.681                   |
| HLA-DOB   | Qd31eNfoolYHj3one4 | rs2857204  | 5.58                         | 5.33                                  | -0.105               | 4.59                         | -36.2                         | 0.3425 | 7.987  | 0.494                             | 7.197   | 7.614           | 7.904  | 8.221           | 9.681                   |
| HLA-DOB   | Qd31eNfoolYHj3one4 | rs719654   | 4.24                         | 4.05                                  | 0.08                 | 2.11                         | -28.41                        | 0.205  | 7.987  | 0.494                             | 7.197   | 7.614           | 7.904  | 8.221           | 9.681                   |
| HLA-DOB   | Qd31eNfoolYHj3one4 | rs2621377  | 3.94                         | 3.77                                  | -0.075               | 1.16                         | -17.44                        | 0.4175 | 7.987  | 0.494                             | 7.197   | 7.614           | 7.904  | 8.221           | 9.681                   |
| HLA-DOB   | Qd31eNfoolYHj3one4 | rs2857151  | 5.71                         | 5.45                                  | -0.111               | 3.44                         | -17.04                        | 0.3518 | 7.987  | 0.494                             | 7.197   | 7.614           | 7.904  | 8.221           | 9.681                   |
| HLA-DOB   | Qd31eNfoolYHj3one4 | rs2621373  | 5                            | 4.78                                  | 0.095                | 4.61                         | -15.42                        | 0.29   | 7.987  | 0.494                             | 7.197   | 7.614           | 7.904  | 8.221           | 9.681                   |
| HLA-DOB   | Qd31eNfoolYHj3one4 | rs2219893  | 5.24                         | 5.01                                  | 0.1                  | 4.45                         | -10.89                        | 0.2985 | 7.987  | 0.494                             | 7.197   | 7.614           | 7.904  | 8.221           | 9.681                   |
| HLA-DOB   | Qd31eNfoolYHj3one4 | rs2621332  | 5.71                         | 5.46                                  | 0.11                 | 3.57                         | -0.23                         | 0.3525 | 7.987  | 0.494                             | 7.197   | 7.614           | 7.904  | 8.221           | 9.681                   |
| HLA-DOB   | Qd31eNfoolYHj3one4 | rs2856997  | 5.11                         | 4.89                                  | 0.096                | 3.63                         | 1.23                          | 0.392  | 7.987  | 0.494                             | 7.197   | 7.614           | 7.904  | 8.221           | 9.681                   |
| HLA-DOB   | Qd31eNfoolYHj3one4 | rs2071474  | 5.11                         | 4.89                                  | -0.097               | 4.49                         | 2.03                          | 0.2675 | 7.987  | 0.494                             | 7.197   | 7.614           | 7.904  | 8.221           | 9.681                   |
| HLA-DOB   | Qd31eNfoolYHj3one4 | rs2071473  | 4.52                         | 4.32                                  | -0.085               | 4.7                          | 2.06                          | 0.3375 | 7.987  | 0.494                             | 7.197   | 7.614           | 7.904  | 8.221           | 9.681                   |
| HLA-DOB   | Qd31eNfoolYHj3one4 | rs2071472  | 5.11                         | 4.89                                  | -0.097               | 4.49                         | -0.16                         | 0.2675 | 7.987  | 0.494                             | 7.197   | 7.614           | 7.904  | 8.221           | 9.681                   |
| HLA-DOB   | Qd31eNfoolYHj3one4 | rs2071469  | 5.26                         | 5.03                                  | -0.099               | 3.12                         | 0                             | 0.3425 | 7.987  | 0.494                             | 7.197   | 7.614           | 7.904  | 8.221           | 9.681                   |
| HLA-DOB   | Qd31eNfoolYHj3one4 | rs1894406  | 4.66                         | 4.46                                  | -0.088               | 2.94                         | 2.27                          | 0.3125 | 7.987  | 0.494                             | 7.197   | 7.614           | 7.904  | 8.221           | 9.681                   |
| HLA-DOB   | Qd31eNfoolYHj3one4 | rs2857106  | 3.59                         | 3.42                                  | 0.067                | 1.77                         | 2.79                          | 0.1641 | 7.987  | 0.494                             | 7.197   | 7.614           | 7.904  | 8.221           | 9.681                   |
| HLA-DOB   | Qd31eNfoolYHj3one4 | rs241453   | 4.6                          | 4.40                                  | 0.087                | 4.4                          | 11.44                         | 0.225  | 7.987  | 0.494                             | 7.197   | 7.614           | 7.904  | 8.221           | 9.681                   |
| HLA-DOB   | Qd31eNfoolYHj3one4 | rs241452   | 4.51                         | 4.31                                  | 0.085                | 4.55                         | 11.56                         | 0.2236 | 7.987  | 0.494                             | 7.197   | 7.614           | 7.904  | 8.221           | 9.681                   |
| HLA-DOB   | Qd31eNfoolYHj3one4 | rs241448   | 4.59                         | 4.39                                  | -0.087               | 4.48                         | 11.9                          | 0.2261 | 7.987  | 0.494                             | 7.197   | 7.614           | 7.904  | 8.221           | 9.681                   |
| HLA-DOB   | Qd31eNfoolYHj3one4 | rs241447   | 4.64                         | 4.43                                  | 0.088                | 4.85                         | 11.97                         | 0.2236 | 7.987  | 0.494                             | 7.197   | 7.614           | 7.904  | 8.221           | 9.681                   |
| HLA-DOB   | Qd31eNfoolYHj3one4 | rs241440   | 4.28                         | 4.09                                  | -0.081               | 3.88                         | 12.58                         | 0.225  | 7.987  | 0.494                             | 7.197   | 7.614           | 7.904  | 8.221           | 9.681                   |
| HLA-DOB   | Qd31eNfoolYHj3one4 | rs241437   | 5.55                         | 5.31                                  | -0.106               | 3.02                         | 12.9                          | 0.315  | 7.987  | 0.494                             | 7.197   | 7.614           | 7.904  | 8.221           | 9.681                   |
| HLA-DOB   | Qd31eNfoolYHj3one4 | rs241436   | 3.78                         | 3.62                                  | -0.07                | 3.66                         | 13.09                         | 0.46   | 7.987  | 0.494                             | 7.197   | 7.614           | 7.904  | 8.221           | 9.681                   |
| HLA-DOB   | Qd31eNfoolYHj3one4 | rs2071481  | 3.81                         | 3.65                                  | -0.069               | 1.79                         | 35.08                         | 0.1175 | 7.987  | 0.494                             | 7.197   | 7.614           | 7.904  | 8.221           | 9.681                   |
| HLA-E     | IBLUXe7cU4VX10R4Xs | rs2516649  | 4.65                         | 4.44                                  | 0.092                | 1.07                         | 35.78                         | 0.3492 | 13.77  | 0.333                             | 12.902  | 13.554          | 13.773 | 13.99           | 14.474                  |
| HLCS      | cMSTRzV_V6LeoECloK | rs7280984  | 3.71                         | 3.56                                  | -0.074               | 3.27                         | 108.68                        | 0.19   | 7.675  | 0.216                             | 7.167   | 7.505           | 7.667  | 7.817           | 8.451                   |
| HLCS      | cMSTRzV_V6LeoECloK | rs2835511  | 3.71                         | 3.56                                  | -0.074               | 3.5                          | 116.31                        | 0.19   | 7.675  | 0.216                             | 7.167   | 7.505           | 7.667  | 7.817           | 8.451                   |

| Symbol | Lumi nuID          | SNP        | Population-based association |                  | % Variance Explained | Family-based association |                  | Distance from transcript (kb) | MAF   | Mean  | Transcript abundance (log2 scale) |         |                 |        |                 | SNP mapping under probe |
|--------|--------------------|------------|------------------------------|------------------|----------------------|--------------------------|------------------|-------------------------------|-------|-------|-----------------------------------|---------|-----------------|--------|-----------------|-------------------------|
|        |                    |            | p-value (-log10)             | p-value (-log10) |                      | p-value (-log10)         | p-value (-log10) |                               |       |       | Standard Deviation                | Minimum | 25th percentile | Median | 75th percentile |                         |
| HLCS   | cMSTrZV_V6LeoECloK | rs1571702  | 3.59                         | 3.44             | 0.064                | 3.72                     | -25.31           | 0.35                          | 7.675 | 0.216 | 7.167                             | 7.505   | 7.667           | 7.817  | 8.451           |                         |
| HMBOX1 | NqizUSLQKBHINVF0m4 | rs10096475 | 4.89                         | 4.68             | 0.093                | 2.31                     | -49.64           | 0.105                         | 8.356 | 0.482 | 7.252                             | 8.061   | 8.254           | 8.624  | 10.154          |                         |
| HMBOX1 | NqizUSLQKBHINVF0m4 | rs10503833 | 3.54                         | 3.39             | 0.064                | 0.76                     | -28.94           | 0.0875                        | 8.356 | 0.482 | 7.252                             | 8.061   | 8.254           | 8.624  | 10.154          |                         |
| HMBOX1 | NqizUSLQKBHINVF0m4 | rs11782284 | 3.33                         | 3.19             | 0.061                | 1.94                     | -1.9             | 0.4375                        | 8.356 | 0.482 | 7.252                             | 8.061   | 8.254           | 8.624  | 10.154          |                         |
| HMBOX1 | NqizUSLQKBHINVF0m4 | rs4732890  | 8.21                         | 7.84             | 0.159                | 3.49                     | 3.16             | 0.2775                        | 8.356 | 0.482 | 7.252                             | 8.061   | 8.254           | 8.624  | 10.154          |                         |
| HMBOX1 | NqizUSLQKBHINVF0m4 | rs1022116  | 5.02                         | 4.80             | 0.096                | 1.7                      | 23.92            | 0.1075                        | 8.356 | 0.482 | 7.252                             | 8.061   | 8.254           | 8.624  | 10.154          |                         |
| HMBOX1 | NqizUSLQKBHINVF0m4 | rs10503835 | 3.29                         | 3.15             | -0.06                | 1.74                     | 74.87            | 0.1683                        | 8.356 | 0.482 | 7.252                             | 8.061   | 8.254           | 8.624  | 10.154          |                         |
| HMBOX1 | NqizUSLQKBHINVF0m4 | rs7837237  | 6.98                         | 6.67             | 0.135                | 2.32                     | -33.21           | 0.285                         | 8.356 | 0.482 | 7.252                             | 8.061   | 8.254           | 8.624  | 10.154          |                         |
| HMBOX1 | NqizUSLQKBHINVF0m4 | rs8180944  | 8.52                         | 8.13             | -0.165               | 3.52                     | -5.35            | 0.2775                        | 8.356 | 0.482 | 7.252                             | 8.061   | 8.254           | 8.624  | 10.154          |                         |
| HMBOX1 | NqizUSLQKBHINVF0m4 | rs936921   | 4.63                         | 4.43             | 0.088                | 1.61                     | 3.48             | 0.0925                        | 8.356 | 0.482 | 7.252                             | 8.061   | 8.254           | 8.624  | 10.154          |                         |
| HMBOX1 | NqizUSLQKBHINVF0m4 | rs17526904 | 7.15                         | 6.83             | -0.135               | 2.02                     | 38.41            | 0.09                          | 8.356 | 0.482 | 7.252                             | 8.061   | 8.254           | 8.624  | 10.154          |                         |
| HMBS   | Noh4Hkq9CX1Kj_XRfo | rs568922   | 3.45                         | 3.30             | -0.066               | 2.92                     | -39.49           | 0.16                          | 9.076 | 0.371 | 8.012                             | 8.837   | 9.055           | 9.291  | 10.24           |                         |
| HMBS   | Noh4Hkq9CX1Kj_XRfo | rs620331   | 3.99                         | 3.82             | -0.078               | 3.08                     | -27.6            | 0.15                          | 9.076 | 0.371 | 8.012                             | 8.837   | 9.055           | 9.291  | 10.24           |                         |
| HMBS   | Noh4Hkq9CX1Kj_XRfo | rs582688   | 3.45                         | 3.30             | 0.066                | 2.92                     | -26.38           | 0.16                          | 9.076 | 0.371 | 8.012                             | 8.837   | 9.055           | 9.291  | 10.24           |                         |
| HMBS   | Noh4Hkq9CX1Kj_XRfo | rs4614     | 4.49                         | 4.30             | 0.087                | 4.41                     | -6.33            | 0.4425                        | 9.076 | 0.371 | 8.012                             | 8.837   | 9.055           | 9.291  | 10.24           |                         |
| HMHb1  | rh2CViv_u6OJKhA_el | rs3792815  | 3.58                         | 3.43             | -0.064               | 1.05                     | 0.48             | 0.1275                        | 7.227 | 0.147 | 7.101                             | 7.168   | 7.205           | 7.246  | 8.461           | Yes                     |
| HOMER2 | 9iOgBCfeurk.3pWi_U | rs2667377  | 3.34                         | 3.20             | 0.064                | 1.28                     | 11.39            | 0.495                         | 7.265 | 0.178 | 7.118                             | 7.169   | 7.208           | 7.282  | 8.534           | Yes                     |
| HOMER2 | 9iOgBCfeurk.3pWi_U | rs1256439  | 3.47                         | 3.33             | -0.067               | 1.47                     | 21.18            | 0.4925                        | 7.265 | 0.178 | 7.118                             | 7.169   | 7.208           | 7.282  | 8.534           | Yes                     |
| HOMER2 | 9iOgBCfeurk.3pWi_U | rs2667385  | 3.39                         | 3.25             | -0.067               | 1.37                     | 33.58            | 0.4425                        | 7.265 | 0.178 | 7.118                             | 7.169   | 7.208           | 7.282  | 8.534           | Yes                     |
| HOMER2 | 9iOgBCfeurk.3pWi_U | rs2621228  | 3.73                         | 3.57             | 0.075                | 0.95                     | 36.17            | 0.44                          | 7.265 | 0.178 | 7.118                             | 7.169   | 7.208           | 7.282  | 8.534           | Yes                     |
| HOMER2 | 9iOgBCfeurk.3pWi_U | rs2251275  | 4.12                         | 3.95             | -0.081               | 1.56                     | 36.79            | 0.465                         | 7.265 | 0.178 | 7.118                             | 7.169   | 7.208           | 7.282  | 8.534           | Yes                     |
| HOPX   | HgI78IISAdQekACQk  | rs6824757  | 4.41                         | 4.22             | 0.091                | 1.28                     | 13.28            | 0.0888                        | 8.524 | 0.76  | 7.163                             | 7.987   | 8.379           | 8.883  | 11.165          |                         |
| HOPX   | rVSqK1V.aigv.CqP3Q | rs6824757  | 3.52                         | 3.37             | 0.068                | 0.88                     | 4.79             | 0.0888                        | 7.386 | 0.172 | 7.137                             | 7.282   | 7.353           | 7.441  | 8.197           |                         |
| HOXB2  | ZpbcegA2Jd1RXS2Tlc | rs4793854  | 15.93                        | 15.18            | 0.302                | 6.07                     | -47.88           | 0.235                         | 9.467 | 0.574 | 8.012                             | 9.056   | 9.522           | 9.871  | 10.817          |                         |
| HOXB2  | ZpbcegA2Jd1RXS2Tlc | rs2325948  | 20.06                        | 19.12            | 0.374                | 7.17                     | -45.53           | 0.4775                        | 9.467 | 0.574 | 8.012                             | 9.056   | 9.522           | 9.871  | 10.817          |                         |
| HOXB2  | ZpbcegA2Jd1RXS2Tlc | rs4793870  | 29.16                        | 27.78            | -0.504               | 8.57                     | -38.83           | 0.3625                        | 9.467 | 0.574 | 8.012                             | 9.056   | 9.522           | 9.871  | 10.817          |                         |
| HOXB2  | ZpbcegA2Jd1RXS2Tlc | rs10853100 | 21.3                         | 20.30            | -0.387               | 7.64                     | -17.59           | 0.485                         | 9.467 | 0.574 | 8.012                             | 9.056   | 9.522           | 9.871  | 10.817          |                         |
| HOXB2  | ZpbcegA2Jd1RXS2Tlc | rs11079828 | 23.05                        | 21.96            | -0.41                | 8.53                     | -10.91           | 0.49                          | 9.467 | 0.574 | 8.012                             | 9.056   | 9.522           | 9.871  | 10.817          |                         |
| HOXB2  | ZpbcegA2Jd1RXS2Tlc | rs9905940  | 18.41                        | 17.55            | 0.339                | 6.8                      | -5.92            | 0.235                         | 9.467 | 0.574 | 8.012                             | 9.056   | 9.522           | 9.871  | 10.817          |                         |
| HOXB2  | ZpbcegA2Jd1RXS2Tlc | rs6504340  | 18.41                        | 17.55            | 0.339                | 6.8                      | -3               | 0.235                         | 9.467 | 0.574 | 8.012                             | 9.056   | 9.522           | 9.871  | 10.817          |                         |
| HOXB2  | ZpbcegA2Jd1RXS2Tlc | rs1042815  | 29.97                        | 28.54            | -0.508               | 9.08                     | 0.27             | 0.3819                        | 9.467 | 0.574 | 8.012                             | 9.056   | 9.522           | 9.871  | 10.817          |                         |
| HOXB2  | ZpbcegA2Jd1RXS2Tlc | rs2229302  | 18.01                        | 17.17            | 0.332                | 6.32                     | 0.38             | 0.195                         | 9.467 | 0.574 | 8.012                             | 9.056   | 9.522           | 9.871  | 10.817          |                         |
| HOXB2  | ZpbcegA2Jd1RXS2Tlc | rs999493   | 5.26                         | 5.03             | -0.102               | 1.42                     | 3.13             | 0.405                         | 9.467 | 0.574 | 8.012                             | 9.056   | 9.522           | 9.871  | 10.817          |                         |
| HOXB2  | ZpbcegA2Jd1RXS2Tlc | rs890432   | 10.57                        | 10.09            | -0.21                | 4.53                     | 6.84             | 0.3266                        | 9.467 | 0.574 | 8.012                             | 9.056   | 9.522           | 9.871  | 10.817          |                         |
| HOXB2  | ZpbcegA2Jd1RXS2Tlc | rs2555111  | 8.81                         | 8.41             | 0.174                | 2.97                     | 26.51            | 0.4875                        | 9.467 | 0.574 | 8.012                             | 9.056   | 9.522           | 9.871  | 10.817          |                         |
| HOXB2  | ZpbcegA2Jd1RXS2Tlc | rs2288278  | 12.96                        | 12.36            | -0.251               | 7.34                     | 38.9             | 0.3575                        | 9.467 | 0.574 | 8.012                             | 9.056   | 9.522           | 9.871  | 10.817          |                         |
| HOXB2  | ZpbcegA2Jd1RXS2Tlc | rs9299     | 5.32                         | 5.09             | 0.104                | 4.61                     | 47.04            | 0.385                         | 9.467 | 0.574 | 8.012                             | 9.056   | 9.522           | 9.871  | 10.817          |                         |
| HOXB2  | ZpbcegA2Jd1RXS2Tlc | rs1529334  | 7.18                         | 6.86             | 0.141                | 3.75                     | 49.4             | 0.1925                        | 9.467 | 0.574 | 8.012                             | 9.056   | 9.522           | 9.871  | 10.817          |                         |
| HOXB3  | It9RV_9TeXIBU2gKDU | rs4793870  | 3.34                         | 3.20             | -0.061               | 3.77                     | -46.06           | 0.3625                        | 7.186 | 0.061 | 7.112                             | 7.145   | 7.171           | 7.207  | 7.616           |                         |
| HOXB3  | It9RV_9TeXIBU2gKDU | rs10853100 | 6.69                         | 6.40             | -0.126               | 4.22                     | -24.82           | 0.485                         | 7.186 | 0.061 | 7.112                             | 7.145   | 7.171           | 7.207  | 7.616           |                         |
| HOXB3  | It9RV_9TeXIBU2gKDU | rs11079828 | 5.03                         | 4.81             | -0.093               | 3.91                     | -18.14           | 0.49                          | 7.186 | 0.061 | 7.112                             | 7.145   | 7.171           | 7.207  | 7.616           |                         |
| HOXB3  | It9RV_9TeXIBU2gKDU | rs2288278  | 5.11                         | 4.88             | -0.094               | 2.75                     | 9.48             | 0.3575                        | 7.186 | 0.061 | 7.112                             | 7.145   | 7.171           | 7.207  | 7.616           |                         |
| HOXB4  | Q9394T1AFKVXF3qnk  | rs11079828 | 7.68                         | 7.34             | -0.153               | 5                        | -43.77           | 0.49                          | 7.471 | 0.185 | 7.121                             | 7.348   | 7.463           | 7.567  | 8.196           |                         |
| HOXB4  | Q9394T1AFKVXF3qnk  | rs9905940  | 7.93                         | 7.57             | 0.157                | 3.96                     | -38.77           | 0.235                         | 7.471 | 0.185 | 7.121                             | 7.348   | 7.463           | 7.567  | 8.196           |                         |
| HOXB4  | Q9394T1AFKVXF3qnk  | rs6504340  | 7.93                         | 7.57             | 0.157                | 3.96                     | -35.86           | 0.235                         | 7.471 | 0.185 | 7.121                             | 7.348   | 7.463           | 7.567  | 8.196           |                         |
| HOXB4  | Q9394T1AFKVXF3qnk  | rs1042815  | 8.81                         | 8.41             | -0.176               | 4.09                     | -32.59           | 0.3819                        | 7.471 | 0.185 | 7.121                             | 7.348   | 7.463           | 7.567  | 8.196           |                         |
| HOXB4  | Q9394T1AFKVXF3qnk  | rs2229302  | 7.03                         | 6.72             | 0.139                | 2.67                     | -32.47           | 0.195                         | 7.471 | 0.185 | 7.121                             | 7.348   | 7.463           | 7.567  | 8.196           |                         |
| HOXB4  | Q9394T1AFKVXF3qnk  | rs890432   | 5.02                         | 4.80             | -0.1                 | 3.58                     | -23.64           | 0.3266                        | 7.471 | 0.185 | 7.121                             | 7.348   | 7.463           | 7.567  | 8.196           |                         |
| HOXB4  | Q9394T1AFKVXF3qnk  | rs2555111  | 3.32                         | 3.18             | 0.063                | 2.39                     | -3.98            | 0.4875                        | 7.471 | 0.185 | 7.121                             | 7.348   | 7.463           | 7.567  | 8.196           |                         |
| HOXB4  | Q9394T1AFKVXF3qnk  | rs2288278  | 4.68                         | 4.47             | -0.092               | 3.72                     | 5.55             | 0.3575                        | 7.471 | 0.185 | 7.121                             | 7.348   | 7.463           | 7.567  | 8.196           |                         |
| HOXB4  | Q9394T1AFKVXF3qnk  | rs1529334  | 3.86                         | 3.70             | 0.074                | 1.73                     | 16.05            | 0.1925                        | 7.471 | 0.185 | 7.121                             | 7.348   | 7.463           | 7.567  | 8.196           |                         |
| HPCAL1 | xSb3SnJXV54AiBbuoc | rs3771138  | 6.27                         | 5.99             | -0.124               | 2.01                     | -23.1            | 0.275                         | 7.193 | 0.085 | 7.098                             | 7.133   | 7.161           | 7.229  | 7.567           | Yes                     |
| HPCAL1 | xSb3SnJXV54AiBbuoc | rs3755264  | 6.27                         | 5.99             | -0.124               | 2.01                     | -21.51           | 0.275                         | 7.193 | 0.085 | 7.098                             | 7.133   | 7.161           | 7.229  | 7.567           | Yes                     |
| HPCAL1 | xSb3SnJXV54AiBbuoc | rs876614   | 7.07                         | 6.75             | -0.141               | 2.22                     | -19.17           | 0.3025                        | 7.193 | 0.085 | 7.098                             | 7.133   | 7.161           | 7.229  | 7.567           | Yes                     |
| HPCAL1 | xSb3SnJXV54AiBbuoc | rs6432096  | 4.15                         | 3.97             | -0.08                | 0.84                     | -6.36            | 0.46                          | 7.193 | 0.085 | 7.098                             | 7.133   | 7.161           | 7.229  | 7.567           | Yes                     |
| HPCAL1 | xSb3SnJXV54AiBbuoc | rs1974676  | 3.58                         | 3.42             | -0.067               | 1.08                     | -3.83            | 0.4725                        | 7.193 | 0.085 | 7.098                             | 7.133   | 7.161           | 7.229  | 7.567           | Yes                     |
| HPCAL1 | xSb3SnJXV54AiBbuoc | rs3755259  | 3.49                         | 3.34             | -0.066               | 0.1                      | -1.71            | 0.27                          | 7.193 | 0.085 | 7.098                             | 7.133   | 7.161           | 7.229  | 7.567           | Yes                     |
| HPCAL1 | xSb3SnJXV54AiBbuoc | rs1465323  | 3.41                         | 3.27             | -0.065               | 0.53                     | 0.15             | 0.3475                        | 7.193 | 0.085 | 7.098                             | 7.133   | 7.161           | 7.229  | 7.567           | Yes                     |
| HPCAL4 | 6V6uKf4nh.ljR7qtCA | rs1148945  | 6.84                         | 6.53             | -0.135               | 0.53                     | -48.59           | 0.345                         | 9.07  | 0.467 | 7.772                             | 8.77    | 9.09            | 9.423  | 10.078          |                         |
| HPCAL4 | 6V6uKf4nh.ljR7qtCA | rs1180280  | 7.51                         | 7.17             | -0.149               | 0.67                     | -38.55           | 0.2375                        | 9.07  | 0.467 | 7.772                             | 8.77    | 9.09            | 9.423  | 10.078          |                         |
| HPCAL4 | 6V6uKf4nh.ljR7qtCA | rs3887860  | 6.81                         | 6.50             | -0.133               | 0.58                     | -32.26           | 0.175                         | 9.07  | 0.467 | 7.772                             | 8.77    | 9.09            | 9.423  | 10.078          |                         |
| HPCAL4 | 6V6uKf4nh.ljR7qtCA | rs784600   | 16.15                        | 15.40            | 0.307                | 3.94                     | -5.09            | 0.4575                        | 9.07  | 0.467 | 7.772                             | 8.77    | 9.09            | 9.423  | 10.078          |                         |



| Symbol    | Lumi nuID           | SNP        | Population-based association |                  | % Variance Explained | Family-based association |                  | Distance from transcript (kb) | MAF   | Mean  | Transcript abundance (log2 scale) |         |                 |        |                 | SNP mapping under probe |
|-----------|---------------------|------------|------------------------------|------------------|----------------------|--------------------------|------------------|-------------------------------|-------|-------|-----------------------------------|---------|-----------------|--------|-----------------|-------------------------|
|           |                     |            | p-value (-log10)             | p-value (-log10) |                      | p-value (-log10)         | p-value (-log10) |                               |       |       | Standard Deviation                | Minimum | 25th percentile | Median | 75th percentile |                         |
| HPCAL4    | 6V6uKf4nh.ljR7qtCA  | rs6703320  | 8.16                         | 7.79             | -0.158               | 0.72                     | 0.65             | 0.495                         | 9.07  | 0.467 | 7.772                             | 8.77    | 9.09            | 9.423  | 10.078          |                         |
| HPCAL4    | 6V6uKf4nh.ljR7qtCA  | rs564249   | 8.68                         | 8.29             | 0.17                 | 1.37                     | -1.47            | 0.3375                        | 9.07  | 0.467 | 7.772                             | 8.77    | 9.09            | 9.423  | 10.078          |                         |
| HPCAL4    | 6V6uKf4nh.ljR7qtCA  | rs546422   | 6.94                         | 6.63             | 0.134                | 1.44                     | 1.74             | 0.1325                        | 9.07  | 0.467 | 7.772                             | 8.77    | 9.09            | 9.423  | 10.078          |                         |
| HPS1      | 0eKLH0RSdfVemNlnSs  | rs4917833  | 3.68                         | 3.52             | -0.072               | 1.7                      | 11.1             | 0.45                          | 7.661 | 0.275 | 7.119                             | 7.456   | 7.65            | 7.847  | 8.354           |                         |
| HPS1      | 0eKLH0RSdfVemNlnSs  | rs1060445  | 4.33                         | 4.14             | -0.084               | 1.37                     | 12.06            | 0.4975                        | 7.661 | 0.275 | 7.119                             | 7.456   | 7.65            | 7.847  | 8.354           |                         |
| HPS1      | 0eKLH0RSdfVemNlnSs  | rs11189618 | 4.33                         | 4.14             | 0.084                | 1.37                     | 12.81            | 0.4975                        | 7.661 | 0.275 | 7.119                             | 7.456   | 7.65            | 7.847  | 8.354           |                         |
| HPS1      | 0eKLH0RSdfVemNlnSs  | rs11189619 | 4.33                         | 4.14             | -0.084               | 1.37                     | 13.31            | 0.4975                        | 7.661 | 0.275 | 7.119                             | 7.456   | 7.65            | 7.847  | 8.354           |                         |
| HPS5      | fpMsXilK1KWQ4ju.s   | rs11024605 | 4.39                         | 4.20             | 0.084                | 2.13                     | 11.48            | 0.1075                        | 8.557 | 0.183 | 7.878                             | 8.444   | 8.57            | 8.662  | 9.074           |                         |
| HPS5      | fpMsXilK1KWQ4ju.s   | rs7128017  | 4.39                         | 4.20             | -0.084               | 2.13                     | 18.96            | 0.1075                        | 8.557 | 0.183 | 7.878                             | 8.444   | 8.57            | 8.662  | 9.074           |                         |
| HRASLS3   | 9k.JvkoOp_kiOJfPotM | rs11231528 | 4.92                         | 4.71             | -0.093               | 3.47                     | -15.51           | 0.304                         | 8.547 | 0.442 | 7.74                              | 8.224   | 8.482           | 8.786  | 10.462          |                         |
| HRASLS3   | 9k.JvkoOp_kiOJfPotM | rs2030731  | 5                            | 4.78             | 0.094                | 3.3                      | -8.25            | 0.305                         | 8.547 | 0.442 | 7.74                              | 8.224   | 8.482           | 8.786  | 10.462          |                         |
| HRASLS3   | 9k.JvkoOp_kiOJfPotM | rs10750999 | 3.82                         | 3.66             | 0.071                | 1.39                     | 17.25            | 0.3225                        | 8.547 | 0.442 | 7.74                              | 8.224   | 8.482           | 8.786  | 10.462          |                         |
| RIHFB2122 | TEqixUsldlg5FtZcoQ  | rs4820297  | 5.89                         | 5.63             | 0.118                | 1.25                     | -36.27           | 0.385                         | 8.031 | 0.211 | 7.444                             | 7.892   | 8.031           | 8.15   | 8.959           |                         |
| RIHFB2122 | TEqixUsldlg5FtZcoQ  | rs4820303  | 6.18                         | 5.90             | 0.122                | 2                        | -8.08            | 0.3025                        | 8.031 | 0.211 | 7.444                             | 7.892   | 8.031           | 8.15   | 8.959           |                         |
| RIHFB2122 | TEqixUsldlg5FtZcoQ  | rs5756813  | 6.13                         | 5.86             | 0.12                 | 1.4                      | 19.52            | 0.3675                        | 8.031 | 0.211 | 7.444                             | 7.892   | 8.031           | 8.15   | 8.959           |                         |
| RIHFB2122 | TEqixUsldlg5FtZcoQ  | rs4821714  | 5.55                         | 5.31             | 0.107                | 1.37                     | 36.49            | 0.38                          | 8.031 | 0.211 | 7.444                             | 7.892   | 8.031           | 8.15   | 8.959           |                         |
| RIHFB2122 | TEqixUsldlg5FtZcoQ  | rs2413485  | 5.55                         | 5.31             | 0.107                | 1.37                     | 37.96            | 0.38                          | 8.031 | 0.211 | 7.444                             | 7.892   | 8.031           | 8.15   | 8.959           |                         |
| RIHFB2122 | TEqixUsldlg5FtZcoQ  | rs2285177  | 5.55                         | 5.31             | 0.109                | 1.71                     | 49.93            | 0.305                         | 8.031 | 0.211 | 7.444                             | 7.892   | 8.031           | 8.15   | 8.959           |                         |
| HSD17B12  | QsUeAV4VIAun5_hfSc  | rs2862996  | 13.5                         | 12.87            | 0.255                | 3.21                     | -48.47           | 0.3065                        | 9.591 | 0.338 | 7.717                             | 9.406   | 9.606           | 9.823  | 10.246          |                         |
| HSD17B12  | QsUeAV4VIAun5_hfSc  | rs2862961  | 13.4                         | 12.78            | -0.255               | 3.25                     | -45.77           | 0.31                          | 9.591 | 0.338 | 7.717                             | 9.406   | 9.606           | 9.823  | 10.246          |                         |
| HSD17B12  | QsUeAV4VIAun5_hfSc  | rs11037537 | 3.4                          | 3.26             | -0.064               | 2.05                     | -30.57           | 0.24                          | 9.591 | 0.338 | 7.717                             | 9.406   | 9.606           | 9.823  | 10.246          |                         |
| HSD17B12  | QsUeAV4VIAun5_hfSc  | rs4755731  | 5.98                         | 5.71             | 0.114                | 1.98                     | -17.14           | 0.4075                        | 9.591 | 0.338 | 7.717                             | 9.406   | 9.606           | 9.823  | 10.246          |                         |
| HSD17B12  | QsUeAV4VIAun5_hfSc  | rs4620711  | 6.39                         | 6.11             | 0.124                | 2.62                     | 11.54            | 0.3894                        | 9.591 | 0.338 | 7.717                             | 9.406   | 9.606           | 9.823  | 10.246          |                         |
| HSD17B12  | QsUeAV4VIAun5_hfSc  | rs7932905  | 8.37                         | 7.99             | 0.164                | 2.28                     | 25.27            | 0.4641                        | 9.591 | 0.338 | 7.717                             | 9.406   | 9.606           | 9.823  | 10.246          |                         |
| HSD17B12  | QsUeAV4VIAun5_hfSc  | rs11037575 | 6.27                         | 6.00             | -0.121               | 2.6                      | 26.02            | 0.3925                        | 9.591 | 0.338 | 7.717                             | 9.406   | 9.606           | 9.823  | 10.246          |                         |
| HSD17B12  | QsUeAV4VIAun5_hfSc  | rs6485451  | 9.4                          | 8.98             | 0.184                | 2.67                     | 41               | 0.46                          | 9.591 | 0.338 | 7.717                             | 9.406   | 9.606           | 9.823  | 10.246          |                         |
| HSD17B12  | QsUeAV4VIAun5_hfSc  | rs6485453  | 4.65                         | 4.44             | -0.09                | 1.77                     | 46.37            | 0.4543                        | 9.591 | 0.338 | 7.717                             | 9.406   | 9.606           | 9.823  | 10.246          |                         |
| HSD17B12  | QsUeAV4VIAun5_hfSc  | rs7110437  | 22.68                        | 21.61            | -0.398               | 5.83                     | 78.25            | 0.275                         | 9.591 | 0.338 | 7.717                             | 9.406   | 9.606           | 9.823  | 10.246          |                         |
| HSD17B12  | QsUeAV4VIAun5_hfSc  | rs4755737  | 5.14                         | 4.92             | -0.102               | 2.35                     | -86.3            | 0.465                         | 9.591 | 0.338 | 7.717                             | 9.406   | 9.606           | 9.823  | 10.246          |                         |
| HSD17B12  | QsUeAV4VIAun5_hfSc  | rs7118659  | 23.36                        | 22.26            | 0.41                 | 6.03                     | -61.04           | 0.285                         | 9.591 | 0.338 | 7.717                             | 9.406   | 9.606           | 9.823  | 10.246          |                         |
| HSD17B12  | QsUeAV4VIAun5_hfSc  | rs2037296  | 3.95                         | 3.79             | -0.075               | 0.88                     | -42.1            | 0.2525                        | 9.591 | 0.338 | 7.717                             | 9.406   | 9.606           | 9.823  | 10.246          |                         |
| HSD17B12  | QsUeAV4VIAun5_hfSc  | rs7131110  | 22.16                        | 21.12            | -0.392               | 5.77                     | -31.32           | 0.28                          | 9.591 | 0.338 | 7.717                             | 9.406   | 9.606           | 9.823  | 10.246          |                         |
| HSD17B12  | QsUeAV4VIAun5_hfSc  | rs1518821  | 21.96                        | 20.92            | 0.391                | 5.65                     | -6.17            | 0.2814                        | 9.591 | 0.338 | 7.717                             | 9.406   | 9.606           | 9.823  | 10.246          |                         |
| HSD17B12  | QsUeAV4VIAun5_hfSc  | rs1518820  | 4                            | 3.82             | 0.075                | 2.16                     | -4.63            | 0.065                         | 9.591 | 0.338 | 7.717                             | 9.406   | 9.606           | 9.823  | 10.246          |                         |
| HSD17B12  | QsUeAV4VIAun5_hfSc  | rs11555762 | 22.16                        | 21.11            | -0.394               | 5.73                     | -1.47            | 0.2814                        | 9.591 | 0.338 | 7.717                             | 9.406   | 9.606           | 9.823  | 10.246          |                         |
| HSD17B12  | QsUeAV4VIAun5_hfSc  | rs11037685 | 5.31                         | 5.08             | -0.103               | 0.95                     | 1.37             | 0.33                          | 9.591 | 0.338 | 7.717                             | 9.406   | 9.606           | 9.823  | 10.246          |                         |
| HSD17B13  | KX.Jd9f.TyVAGuQdz3o | rs11935592 | 3.39                         | 3.25             | -0.066               | 3.79                     | -47.9            | 0.19                          | 7.122 | 0.019 | 7.097                             | 7.109   | 7.117           | 7.129  | 7.218           |                         |
| HSD17B13  | KX.Jd9f.TyVAGuQdz3o | rs7694379  | 4.07                         | 3.89             | -0.085               | 1.55                     | -38.43           | 0.415                         | 7.122 | 0.019 | 7.097                             | 7.109   | 7.117           | 7.129  | 7.218           |                         |
| HSD17B13  | KX.Jd9f.TyVAGuQdz3o | rs4693811  | 4.22                         | 4.04             | 0.084                | 1.1                      | -24.85           | 0.4293                        | 7.122 | 0.019 | 7.097                             | 7.109   | 7.117           | 7.129  | 7.218           |                         |
| HSD17B13  | KX.Jd9f.TyVAGuQdz3o | rs10022237 | 3.54                         | 3.39             | 0.072                | 1.93                     | 3.29             | 0.4625                        | 7.122 | 0.019 | 7.097                             | 7.109   | 7.117           | 7.129  | 7.218           |                         |
| HSD17B13  | KX.Jd9f.TyVAGuQdz3o | rs13130041 | 6.57                         | 6.28             | 0.134                | 3.22                     | 4.2              | 0.24                          | 7.122 | 0.019 | 7.097                             | 7.109   | 7.117           | 7.129  | 7.218           |                         |
| HSD17B13  | KX.Jd9f.TyVAGuQdz3o | rs10433937 | 6.45                         | 6.16             | -0.131               | 3.57                     | 5.16             | 0.2425                        | 7.122 | 0.019 | 7.097                             | 7.109   | 7.117           | 7.129  | 7.218           |                         |
| HSPA1L    | 6ogot05FzRHV0TXv0   | rs12210887 | 4.56                         | 4.36             | -0.092               | 1.25                     | 32.92            | 0.0609                        | 9.875 | 0.305 | 8.946                             | 9.704   | 9.924           | 10.089 | 10.564          | Yes                     |
| HSPA4     | NV3_4qeiTpGk6PBGkg  | rs4574536  | 3.63                         | 3.47             | 0.068                | 3.25                     | -2.97            | 0.2175                        | 7.637 | 0.195 | 7.137                             | 7.502   | 7.635           | 7.776  | 8.174           |                         |
| HSPA4     | NV3_4qeiTpGk6PBGkg  | rs4705990  | 3.97                         | 3.80             | -0.074               | 3.59                     | 15.77            | 0.2425                        | 7.637 | 0.195 | 7.137                             | 7.502   | 7.635           | 7.776  | 8.174           |                         |
| HSPBAP1   | HiULP1JKCw7fXsXQUo  | rs11719086 | 5.4                          | 5.16             | 0.112                | 1.3                      | -40.1            | 0.21                          | 9.019 | 0.359 | 7.204                             | 8.799   | 9.048           | 9.277  | 10.456          |                         |
| HSPBAP1   | HiULP1JKCw7fXsXQUo  | rs13062151 | 5.15                         | 4.93             | 0.106                | 1.22                     | -34.23           | 0.2075                        | 9.019 | 0.359 | 7.204                             | 8.799   | 9.048           | 9.277  | 10.456          |                         |
| HSPBAP1   | HiULP1JKCw7fXsXQUo  | rs3115     | 7.52                         | 7.18             | 0.154                | 1.83                     | 0.04             | 0.13                          | 9.019 | 0.359 | 7.204                             | 8.799   | 9.048           | 9.277  | 10.456          |                         |
| HTR2B     | KXIOxSLUOKdYL0FFPS0 | rs12694886 | 4.03                         | 3.86             | -0.077               | 0.72                     | -49.4            | 0.3025                        | 7.159 | 0.108 | 7.104                             | 7.117   | 7.128           | 7.145  | 7.865           |                         |
| HTR2B     | KXIOxSLUOKdYL0FFPS0 | rs1472959  | 3.61                         | 3.46             | 0.068                | 0.9                      | -32              | 0.3575                        | 7.159 | 0.108 | 7.104                             | 7.117   | 7.128           | 7.145  | 7.865           |                         |
| HTR2B     | KXIOxSLUOKdYL0FFPS0 | rs6436999  | 4.2                          | 4.02             | -0.081               | 1.16                     | -30.46           | 0.2739                        | 7.159 | 0.108 | 7.104                             | 7.117   | 7.128           | 7.145  | 7.865           |                         |
| HTR2B     | KXIOxSLUOKdYL0FFPS0 | rs10194776 | 3.73                         | 3.57             | 0.072                | 0.52                     | 7.06             | 0.3367                        | 7.159 | 0.108 | 7.104                             | 7.117   | 7.128           | 7.145  | 7.865           |                         |
| HTR2B     | KXIOxSLUOKdYL0FFPS0 | rs2032953  | 4.14                         | 3.96             | 0.079                | 0.63                     | 45.97            | 0.2975                        | 7.159 | 0.108 | 7.104                             | 7.117   | 7.128           | 7.145  | 7.865           |                         |
| HYAL3     | 3pCgkvUqItK9ScvKnk  | rs13100173 | 6.81                         | 6.50             | 0.133                | 2.14                     | 2.44             | 0.4525                        | 7.511 | 0.16  | 7.156                             | 7.403   | 7.505           | 7.606  | 8.395           |                         |
| HYAL3     | 3pCgkvUqItK9ScvKnk  | rs2236947  | 6.81                         | 6.50             | 0.133                | 2.18                     | 34.53            | 0.4525                        | 7.511 | 0.16  | 7.156                             | 7.403   | 7.505           | 7.606  | 8.395           |                         |
| ICMT      | QXaXd7TnqC5cd3qUec  | rs1064721  | 4.9                          | 4.69             | -0.096               | 1.94                     | 0.12             | 0.0575                        | 8.657 | 0.22  | 8.119                             | 8.517   | 8.68            | 8.8    | 9.8             |                         |
| ICMT      | QXaXd7TnqC5cd3qUec  | rs1802353  | 3.37                         | 3.23             | -0.063               | 1.56                     | 3.43             | 0.08                          | 8.657 | 0.22  | 8.119                             | 8.517   | 8.68            | 8.8    | 9.8             |                         |
| ICOSLg    | i4JvdlJXl7RtpP7fW   | rs3788111  | 6.73                         | 6.43             | 0.133                | 3.69                     | 7.34             | 0.195                         | 7.297 | 0.09  | 7.117                             | 7.231   | 7.292           | 7.352  | 7.612           |                         |
| IDH3B     | TqipCjqluidfv1c     | rs2422821  | 3.63                         | 3.48             | -0.068               | 0.42                     | -8.73            | 0.3775                        | 7.201 | 0.068 | 7.11                              | 7.149   | 7.185           | 7.241  | 7.595           |                         |
| IFIT1     | N4OCV6LHOJqV4h6eeE  | rs304505   | 4                            | 3.83             | -0.076               | 1.61                     | -13.8            | 0.1875                        | 9.044 | 0.509 | 7.953                             | 8.744   | 8.988           | 9.22   | 12.424          |                         |
| IFIT1     | N4OCV6LHOJqV4h6eeE  | rs304500   | 3.9                          | 3.73             | 0.075                | 1.73                     | -2.82            | 0.19                          | 9.044 | 0.509 | 7.953                             | 8.744   | 8.988           | 9.22   | 12.424          |                         |
| IFIT1     | N4OCV6LHOJqV4h6eeE  | rs304411   | 4.13                         | 3.95             | -0.079               | 1.24                     | 23.27            | 0.185                         | 9.044 | 0.509 | 7.953                             | 8.744   | 8.988           | 9.22   | 12.424          |                         |

| Symbol  | Lumi nuID           | SNP        | Population-based association p-value (-log10) | Population-based association p-value (-log10), GC adj. | % Variance Explained | Family-based association p-value (-log10) | Distance from transcript (kb) | MAF    | Mean   | Transcript abundance (log2 scale) |         |                 |        |                 | SNP mapping under probe |         |
|---------|---------------------|------------|-----------------------------------------------|--------------------------------------------------------|----------------------|-------------------------------------------|-------------------------------|--------|--------|-----------------------------------|---------|-----------------|--------|-----------------|-------------------------|---------|
|         |                     |            |                                               |                                                        |                      |                                           |                               |        |        | Standard Deviation                | Minimum | 25th percentile | Median | 75th percentile |                         | Maximum |
| IFIT5   | NqI4j95H8BCddcrj    | rs304505   | 5.82                                          | 5.56                                                   | -0.117               | 3.09                                      | -35.86                        | 0.1875 | 8.041  | 0.21                              | 7.181   | 7.912           | 8.034  | 8.174           | 8.982                   |         |
| IFIT5   | NqI4j95H8BCddcrj    | rs304493   | 6.07                                          | 5.81                                                   | -0.123               | 3.74                                      | -31.85                        | 0.2075 | 8.041  | 0.21                              | 7.181   | 7.912           | 8.034  | 8.174           | 8.982                   |         |
| IFIT5   | NqI4j95H8BCddcrj    | rs304500   | 6.16                                          | 5.89                                                   | 0.125                | 3.11                                      | -24.88                        | 0.19   | 8.041  | 0.21                              | 7.181   | 7.912           | 8.034  | 8.174           | 8.982                   |         |
| IFIT5   | NqI4j95H8BCddcrj    | rs303212   | 8.82                                          | 8.42                                                   | 0.179                | 4.86                                      | -13.08                        | 0.23   | 8.041  | 0.21                              | 7.181   | 7.912           | 8.034  | 8.174           | 8.982                   |         |
| IFIT5   | NqI4j95H8BCddcrj    | rs304411   | 7.77                                          | 7.42                                                   | -0.158               | 3.28                                      | 6.13                          | 0.185  | 8.041  | 0.21                              | 7.181   | 7.912           | 8.034  | 8.174           | 8.982                   |         |
| IFITM3  | ijfUpc6MjSik0eKUok  | rs10398    | 3.47                                          | 3.32                                                   | 0.071                | 1.63                                      | -11.49                        | 0.1911 | 9.434  | 1.15                              | 7.384   | 8.591           | 9.252  | 10.205          | 13.222                  |         |
| IGFBP3  | rjEHulOHigKJ0ZUIHo  | rs2453836  | 5.2                                           | 4.98                                                   | 0.096                | 3.11                                      | 4.92                          | 0.1875 | 7.789  | 0.303                             | 7.133   | 7.555           | 7.777  | 7.964           | 8.768                   |         |
| IGFBP3  | rjEHulOHigKJ0ZUIHo  | rs2471552  | 5.97                                          | 5.70                                                   | 0.112                | 2.29                                      | 16.3                          | 0.1975 | 7.789  | 0.303                             | 7.133   | 7.555           | 7.777  | 7.964           | 8.768                   |         |
| IGFBP3  | rjEHulOHigKJ0ZUIHo  | rs2965073  | 5.14                                          | 4.92                                                   | 0.096                | 2.38                                      | 20.25                         | 0.185  | 7.789  | 0.303                             | 7.133   | 7.555           | 7.777  | 7.964           | 8.768                   |         |
| IGFBP3  | rjEHulOHigKJ0ZUIHo  | rs1534151  | 6.16                                          | 5.89                                                   | 0.113                | 2.5                                       | 23.77                         | 0.3325 | 7.789  | 0.303                             | 7.133   | 7.555           | 7.777  | 7.964           | 8.768                   |         |
| IGFBP3  | rjEHulOHigKJ0ZUIHo  | rs1534150  | 6.16                                          | 5.89                                                   | -0.114               | 2.49                                      | 24.42                         | 0.3342 | 7.789  | 0.303                             | 7.133   | 7.555           | 7.777  | 7.964           | 8.768                   |         |
| IGFBP3  | rjEHulOHigKJ0ZUIHo  | rs788718   | 4.66                                          | 4.46                                                   | -0.085               | 2.2                                       | 45.67                         | 0.195  | 7.789  | 0.303                             | 7.133   | 7.555           | 7.777  | 7.964           | 8.768                   |         |
| IGHMBP2 | o4t6qkXf3pe5F3d6fM  | rs604524   | 4.99                                          | 4.77                                                   | -0.1                 | 1.23                                      | -41.44                        | 0.29   | 7.749  | 0.283                             | 7.218   | 7.556           | 7.701  | 7.896           | 8.677                   |         |
| IGHMBP2 | o4t6qkXf3pe5F3d6fM  | rs629426   | 4.92                                          | 4.70                                                   | 0.099                | 1.34                                      | -0.27                         | 0.2875 | 7.749  | 0.283                             | 7.218   | 7.556           | 7.701  | 7.896           | 8.677                   |         |
| IGHMBP2 | o4t6qkXf3pe5F3d6fM  | rs10896379 | 3.3                                           | 3.16                                                   | 0.061                | 0.45                                      | 9.21                          | 0.1725 | 7.749  | 0.283                             | 7.218   | 7.556           | 7.701  | 7.896           | 8.677                   |         |
| IGHMBP2 | o4t6qkXf3pe5F3d6fM  | rs622082   | 5.09                                          | 4.87                                                   | 0.103                | 1.57                                      | -4.1                          | 0.2854 | 7.749  | 0.283                             | 7.218   | 7.556           | 7.701  | 7.896           | 8.677                   |         |
| IGHMBP2 | o4t6qkXf3pe5F3d6fM  | rs10896384 | 5.14                                          | 4.91                                                   | -0.102               | 1.63                                      | 11.95                         | 0.2925 | 7.749  | 0.283                             | 7.218   | 7.556           | 7.701  | 7.896           | 8.677                   |         |
| IGL1    | QVH56VaQ.Q1CTB0uGQ  | rs131429   | 3.3                                           | 3.16                                                   | -0.065               | 1                                         | 3.28                          | 0.345  | 7.199  | 0.063                             | 7.111   | 7.158           | 7.188  | 7.225           | 7.602                   |         |
| IKBKAP  | ipEJj0bKN5V7hQBF1Q  | rs874863   | 3.4                                           | 3.26                                                   | 0.064                | 3.01                                      | 32.18                         | 0.1475 | 7.368  | 0.103                             | 7.136   | 7.298           | 7.356  | 7.421           | 7.719                   |         |
| IL12RB1 | Ktfoo6ISuQpQjuNvik  | rs2305740  | 3.32                                          | 3.18                                                   | -0.065               | 1.14                                      | 9.87                          | 0.215  | 7.208  | 0.06                              | 7.096   | 7.164           | 7.203  | 7.24            | 7.438                   |         |
| IL12RB1 | Ktfoo6ISuQpQjuNvik  | rs375947   | 4.48                                          | 4.29                                                   | -0.09                | 2.38                                      | 10.08                         | 0.31   | 7.208  | 0.06                              | 7.096   | 7.164           | 7.203  | 7.24            | 7.438                   |         |
| IL12RB1 | Ktfoo6ISuQpQjuNvik  | rs429774   | 4.44                                          | 4.24                                                   | 0.089                | 2.47                                      | -10.95                        | 0.31   | 7.208  | 0.06                              | 7.096   | 7.164           | 7.203  | 7.24            | 7.438                   |         |
| IL12RB1 | Ktfoo6ISuQpQjuNvik  | rs2305743  | 3.38                                          | 3.24                                                   | 0.066                | 1.05                                      | -4.51                         | 0.2175 | 7.208  | 0.06                              | 7.096   | 7.164           | 7.203  | 7.24            | 7.438                   |         |
| IL16    | 0IQqAgCgp33VSL1U5I  | rs7171517  | 5.21                                          | 4.98                                                   | -0.094               | 2.49                                      | -21.62                        | 0.1075 | 9.757  | 0.329                             | 8.607   | 9.546           | 9.758  | 9.954           | 10.504                  | Yes     |
| IL16    | 0IQqAgCgp33VSL1U5I  | rs3848180  | 7.62                                          | 7.28                                                   | -0.144               | 3.5                                       | -8.51                         | 0.3939 | 9.757  | 0.329                             | 8.607   | 9.546           | 9.758  | 9.954           | 10.504                  | Yes     |
| IL16    | 0IQqAgCgp33VSL1U5I  | rs859      | 9.92                                          | 9.47                                                   | 0.183                | 4.19                                      | -3.78                         | 0.2375 | 9.757  | 0.329                             | 8.607   | 9.546           | 9.758  | 9.954           | 10.504                  | Yes     |
| IL16    | 0IQqAgCgp33VSL1U5I  | rs1131445  | 4.84                                          | 4.63                                                   | -0.088               | 2.99                                      | -3.32                         | 0.31   | 9.757  | 0.329                             | 8.607   | 9.546           | 9.758  | 9.954           | 10.504                  | Yes     |
| IL16    | 0IQqAgCgp33VSL1U5I  | rs6495560  | 4.37                                          | 4.18                                                   | 0.079                | 2.71                                      | 2.4                           | 0.3525 | 9.757  | 0.329                             | 8.607   | 9.546           | 9.758  | 9.954           | 10.504                  | Yes     |
| IL18R1  | 6h7gFlL2gp68gTuokE  | rs1420101  | 3.3                                           | 3.16                                                   | 0.064                | 0.13                                      | -21.38                        | 0.3825 | 8.995  | 0.399                             | 7.778   | 8.736           | 9.02   | 9.235           | 10.065                  |         |
| IL18R1  | 6h7gFlL2gp68gTuokE  | rs12998521 | 4.08                                          | 3.91                                                   | 0.081                | 0.01                                      | -4.68                         | 0.39   | 8.995  | 0.399                             | 7.778   | 8.736           | 9.02   | 9.235           | 10.065                  |         |
| IL1B    | odF3XHR8CVI4SAUaUQ  | rs4849123  | 3.44                                          | 3.30                                                   | -0.063               | 1.29                                      | -18.3                         | 0.2875 | 7.816  | 0.692                             | 7.131   | 7.314           | 7.553  | 8.107           | 11.26                   |         |
| IL1RN   | 0nBUwHnqANN_gp3gU   | rs17669228 | 3.3                                           | 3.16                                                   | 0.063                | 0.98                                      | -27.76                        | 0.2125 | 7.192  | 0.042                             | 7.116   | 7.163           | 7.186  | 7.219           | 7.335                   |         |
| IL21R   | HnqVXFVQ9DXIDA17c   | rs3093390  | 3.69                                          | 3.53                                                   | 0.07                 | 1.28                                      | 1.33                          | 0.2275 | 8.659  | 0.274                             | 8.071   | 8.473           | 8.64   | 8.841           | 9.54                    |         |
| IL21R   | HnqVXFVQ9DXIDA17c   | rs232057   | 3.59                                          | 3.44                                                   | 0.068                | 1.51                                      | 26.08                         | 0.145  | 8.659  | 0.274                             | 8.071   | 8.473           | 8.64   | 8.841           | 9.54                    |         |
| IL23R   | Ze51xTRTsIPVqJ1OX8  | rs7517847  | 3.46                                          | 3.31                                                   | 0.066                | 1.35                                      | -43.99                        | 0.465  | 7.177  | 0.067                             | 7.106   | 7.134           | 7.158  | 7.193           | 7.531                   |         |
| IL28RA  | 3sW093ekUliefborB8  | rs7552167  | 4.33                                          | 4.14                                                   | -0.083               | 1.81                                      | 4.89                          | 0.1425 | 7.268  | 0.101                             | 7.128   | 7.201           | 7.241  | 7.31            | 7.709                   |         |
| IL32    | 99UqQp43vls8tb.REK  | rs1004792  | 4.36                                          | 4.17                                                   | 0.089                | 1.5                                       | -21.4                         | 0.245  | 10.368 | 0.368                             | 9.056   | 10.137          | 10.393 | 10.62           | 11.279                  |         |
| IL32    | 99UqQp43vls8tb.REK  | rs1554999  | 8.19                                          | 7.82                                                   | 0.167                | 3.49                                      | -0.04                         | 0.3744 | 10.368 | 0.368                             | 9.056   | 10.137          | 10.393 | 10.62           | 11.279                  |         |
| IL32    | 99UqQp43vls8tb.REK  | rs12917910 | 3.82                                          | 3.66                                                   | -0.075               | 3.18                                      | 5.54                          | 0.435  | 10.368 | 0.368                             | 9.056   | 10.137          | 10.393 | 10.62           | 11.279                  |         |
| IL32    | 99UqQp43vls8tb.REK  | rs4786377  | 5.61                                          | 5.36                                                   | -0.111               | 1.61                                      | 5.76                          | 0.0553 | 10.368 | 0.368                             | 9.056   | 10.137          | 10.393 | 10.62           | 11.279                  |         |
| IL34    | KEkdJ9eX1MntOI0Xo   | rs1456954  | 3.83                                          | 3.67                                                   | 0.071                | 0.28                                      | -41.38                        | 0.0575 | 7.115  | 0.013                             | 7.096   | 7.107           | 7.112  | 7.12            | 7.198                   |         |
| IMMP2L  | fioOHk4NxeL56T6iil  | rs38744    | 14.24                                         | 13.57                                                  | 0.281                | 6.34                                      | -153.77                       | 0.4725 | 8.12   | 0.219                             | 7.538   | 7.974           | 8.117  | 8.263           | 8.792                   |         |
| IMMP2L  | fioOHk4NxeL56T6iil  | rs38752    | 6.13                                          | 5.86                                                   | -0.121               | 3.12                                      | -123.44                       | 0.33   | 8.12   | 0.219                             | 7.538   | 7.974           | 8.117  | 8.263           | 8.792                   |         |
| IMMP2L  | fioOHk4NxeL56T6iil  | rs12671676 | 6.58                                          | 6.29                                                   | -0.133               | 3.27                                      | -89.49                        | 0.245  | 8.12   | 0.219                             | 7.538   | 7.974           | 8.117  | 8.263           | 8.792                   |         |
| IMMP2L  | fioOHk4NxeL56T6iil  | rs2529489  | 6.11                                          | 5.84                                                   | -0.12                | 3.15                                      | -42.45                        | 0.3375 | 8.12   | 0.219                             | 7.538   | 7.974           | 8.117  | 8.263           | 8.792                   |         |
| IMMP2L  | fioOHk4NxeL56T6iil  | rs4730488  | 13.67                                         | 13.03                                                  | 0.277                | 6.51                                      | -36.18                        | 0.4643 | 8.12   | 0.219                             | 7.538   | 7.974           | 8.117  | 8.263           | 8.792                   |         |
| IMMP2L  | fioOHk4NxeL56T6iil  | rs2613585  | 4.28                                          | 4.10                                                   | 0.084                | 1.97                                      | -15.65                        | 0.1131 | 8.12   | 0.219                             | 7.538   | 7.974           | 8.117  | 8.263           | 8.792                   |         |
| IMMP2L  | fioOHk4NxeL56T6iil  | rs2396393  | 3.59                                          | 3.44                                                   | 0.069                | 1.75                                      | -11.15                        | 0.1136 | 8.12   | 0.219                             | 7.538   | 7.974           | 8.117  | 8.263           | 8.792                   |         |
| IMMP2L  | fioOHk4NxeL56T6iil  | rs12705779 | 4.57                                          | 4.38                                                   | 0.09                 | 2.07                                      | -2.58                         | 0.1432 | 8.12   | 0.219                             | 7.538   | 7.974           | 8.117  | 8.263           | 8.792                   |         |
| IMMP2L  | fioOHk4NxeL56T6iil  | rs17158652 | 3.65                                          | 3.49                                                   | -0.069               | 1.6                                       | 25.83                         | 0.0875 | 8.12   | 0.219                             | 7.538   | 7.974           | 8.117  | 8.263           | 8.792                   |         |
| IMMP2L  | fioOHk4NxeL56T6iil  | rs2528691  | 13.78                                         | 13.14                                                  | -0.27                | 6.75                                      | 26.1                          | 0.46   | 8.12   | 0.219                             | 7.538   | 7.974           | 8.117  | 8.263           | 8.792                   |         |
| IMMP2L  | fioOHk4NxeL56T6iil  | rs11979526 | 3.84                                          | 3.67                                                   | 0.073                | 1.36                                      | 37.97                         | 0.085  | 8.12   | 0.219                             | 7.538   | 7.974           | 8.117  | 8.263           | 8.792                   |         |
| IMMP2L  | fioOHk4NxeL56T6iil  | rs2613611  | 6.09                                          | 5.82                                                   | 0.12                 | 2.51                                      | 44.6                          | 0.1475 | 8.12   | 0.219                             | 7.538   | 7.974           | 8.117  | 8.263           | 8.792                   |         |
| IMPA1   | rvSXzV_kbASHHIFPso  | rs1967328  | 3.36                                          | 3.22                                                   | -0.064               | 0.87                                      | 13.57                         | 0.3392 | 8.956  | 0.56                              | 7.177   | 8.539           | 8.952  | 9.347           | 10.092                  |         |
| IMPA2   | 6fyB54wJo290pXVVos  | rs619671   | 3.65                                          | 3.50                                                   | -0.069               | 0.34                                      | -20.27                        | 0.2186 | 8.905  | 0.632                             | 7.789   | 8.403           | 8.767  | 9.27            | 10.788                  |         |
| IMPA2   | 6fyB54wJo290pXVVos  | rs662383   | 3.5                                           | 3.35                                                   | 0.064                | 0.87                                      | 1.62                          | 0.2575 | 8.905  | 0.632                             | 7.789   | 8.403           | 8.767  | 9.27            | 10.788                  |         |
| INADL   | 6UX69IR54EU1IIRliok | rs12408292 | 3.33                                          | 3.19                                                   | -0.064               | 1.25                                      | 4.67                          | 0.38   | 7.451  | 0.193                             | 7.143   | 7.312           | 7.401  | 7.539           | 8.142                   |         |
| ING1    | o0hXq0oDx5UftC9JUJ  | rs4771705  | 3.42                                          | 3.28                                                   | 0.069                | 1.61                                      | -43.87                        | 0.375  | 9.704  | 0.376                             | 8.626   | 9.479           | 9.722  | 9.981           | 10.373                  |         |
| ING1    | o0hXq0oDx5UftC9JUJ  | rs2119480  | 3.42                                          | 3.28                                                   | 0.069                | 1.62                                      | -21.74                        | 0.3775 | 9.704  | 0.376                             | 8.626   | 9.479           | 9.722  | 9.981           | 10.373                  |         |
| INPP5E  | fW.n38HUIlmg4Ty6Bak | rs10781511 | 10.91                                         | 10.41                                                  | 0.216                | 5.03                                      | -42.3                         | 0.235  | 8.881  | 0.529                             | 7.523   | 8.506           | 8.872  | 9.258           | 10.5                    |         |
| INPP5E  | fW.n38HUIlmg4Ty6Bak | rs11145835 | 4.62                                          | 4.42                                                   | -0.089               | 1.98                                      | -38.62                        | 0.13   | 8.881  | 0.529                             | 7.523   | 8.506           | 8.872  | 9.258           | 10.5                    |         |
| INPP5E  | fW.n38HUIlmg4Ty6Bak | rs4266763  | 18.36                                         | 17.50                                                  | -0.338               | 7.86                                      | -33.25                        | 0.405  | 8.881  | 0.529                             | 7.523   | 8.506           | 8.872  | 9.258           | 10.5                    |         |

| Symbol   | Lumi nuID           | SNP        | Population-based association |                  | % Variance Explained | Family-based association |                               | Transcript abundance (log2 scale) |       |                    |         |                 |        |                 | SNP mapping under probe |         |
|----------|---------------------|------------|------------------------------|------------------|----------------------|--------------------------|-------------------------------|-----------------------------------|-------|--------------------|---------|-----------------|--------|-----------------|-------------------------|---------|
|          |                     |            | p-value (-log10)             | p-value (-log10) |                      | p-value (-log10)         | Distance from transcript (kb) | MAF                               | Mean  | Standard Deviation | Minimum | 25th percentile | Median | 75th percentile |                         | Maximum |
| INPP5E   | fW.n38HUIimg4Ty6Bak | rs3812577  | 3.98                         | 3.81             | -0.076               | 2.14                     | -23.43                        | 0.1275                            | 8.881 | 0.529              | 7.523   | 8.506           | 8.872  | 9.258           | 10.5                    |         |
| INPP5E   | fW.n38HUIimg4Ty6Bak | rs10870144 | 5.68                         | 5.43             | -0.111               | 2.28                     | -16.6                         | 0.1725                            | 8.881 | 0.529              | 7.523   | 8.506           | 8.872  | 9.258           | 10.5                    |         |
| INPP5E   | fW.n38HUIimg4Ty6Bak | rs1130635  | 11.3                         | 10.78            | 0.222                | 5.14                     | -5.2                          | 0.2725                            | 8.881 | 0.529              | 7.523   | 8.506           | 8.872  | 9.258           | 10.5                    |         |
| INPP5E   | fW.n38HUIimg4Ty6Bak | rs1128877  | 6.02                         | 5.75             | -0.121               | 2.28                     | 0.13                          | 0.1425                            | 8.881 | 0.529              | 7.523   | 8.506           | 8.872  | 9.258           | 10.5                    |         |
| INPP5E   | fW.n38HUIimg4Ty6Bak | rs1127162  | 5.87                         | 5.61             | 0.118                | 2.69                     | 0.95                          | 0.14                              | 8.881 | 0.529              | 7.523   | 8.506           | 8.872  | 9.258           | 10.5                    |         |
| INPP5E   | fW.n38HUIimg4Ty6Bak | rs1127152  | 30.87                        | 29.40            | -0.516               | 10.58                    | 1.34                          | 0.4075                            | 8.881 | 0.529              | 7.523   | 8.506           | 8.872  | 9.258           | 10.5                    |         |
| INPP5E   | fW.n38HUIimg4Ty6Bak | rs3812594  | 12.51                        | 11.94            | 0.248                | 4.57                     | 34.7                          | 0.24                              | 8.881 | 0.529              | 7.523   | 8.506           | 8.872  | 9.258           | 10.5                    |         |
| INPP5E   | fW.n38HUIimg4Ty6Bak | rs3812595  | 12.52                        | 11.94            | -0.249               | 4.74                     | 34.81                         | 0.2387                            | 8.881 | 0.529              | 7.523   | 8.506           | 8.872  | 9.258           | 10.5                    |         |
| INPP5E   | fW.n38HUIimg4Ty6Bak | rs10870070 | 6.49                         | 6.20             | 0.131                | 3.92                     | 40.7                          | 0.165                             | 8.881 | 0.529              | 7.523   | 8.506           | 8.872  | 9.258           | 10.5                    |         |
| INPP5E   | fW.n38HUIimg4Ty6Bak | rs4379550  | 30.86                        | 29.39            | -0.515               | 10.26                    | 42.17                         | 0.4075                            | 8.881 | 0.529              | 7.523   | 8.506           | 8.872  | 9.258           | 10.5                    |         |
| INSIG1   | WjFfe4ovg.ghR_nv0Q  | rs13223383 | 6.62                         | 6.32             | 0.136                | 2.56                     | 1.84                          | 0.33                              | 7.362 | 0.15               | 7.116   | 7.245           | 7.346  | 7.451           | 7.835                   |         |
| INVS     | 3iRlovitKJyinoHnXU  | rs12552646 | 4.3                          | 4.12             | 0.084                | 1.68                     | 6.96                          | 0.4575                            | 7.23  | 0.066              | 7.112   | 7.179           | 7.223  | 7.276           | 7.432                   |         |
| INVS     | 3iRlovitKJyinoHnXU  | rs1999877  | 4.28                         | 4.10             | 0.084                | 1.13                     | -89.71                        | 0.48                              | 7.23  | 0.066              | 7.112   | 7.179           | 7.223  | 7.276           | 7.432                   |         |
| INVS     | 3iRlovitKJyinoHnXU  | rs2787364  | 4.28                         | 4.10             | -0.084               | 1.13                     | -84.18                        | 0.48                              | 7.23  | 0.066              | 7.112   | 7.179           | 7.223  | 7.276           | 7.432                   |         |
| INVS     | 3iRlovitKJyinoHnXU  | rs1572607  | 4.28                         | 4.10             | -0.084               | 1.13                     | -82.76                        | 0.48                              | 7.23  | 0.066              | 7.112   | 7.179           | 7.223  | 7.276           | 7.432                   |         |
| INVS     | 3iRlovitKJyinoHnXU  | rs2806699  | 4.18                         | 4.00             | -0.082               | 0.91                     | -9.24                         | 0.4275                            | 7.23  | 0.066              | 7.112   | 7.179           | 7.223  | 7.276           | 7.432                   |         |
| INVS     | 3iRlovitKJyinoHnXU  | rs7472     | 6.63                         | 6.33             | -0.134               | 1.09                     | 1.1                           | 0.335                             | 7.23  | 0.066              | 7.112   | 7.179           | 7.223  | 7.276           | 7.432                   |         |
| INVS     | TJe1TJfXdHH9ek3Dk   | rs7472     | 3.78                         | 3.62             | -0.075               | 1.08                     | 1.1                           | 0.335                             | 7.284 | 0.075              | 7.133   | 7.23            | 7.283  | 7.331           | 7.474                   |         |
| INVS     | 3iRlovitKJyinoHnXU  | rs4743392  | 3.95                         | 3.78             | -0.077               | 1.53                     | 5.48                          | 0.4824                            | 7.23  | 0.066              | 7.112   | 7.179           | 7.223  | 7.276           | 7.432                   |         |
| INVS     | TJe1TJfXdHH9ek3Dk   | rs4743392  | 3.3                          | 3.17             | -0.064               | 0.93                     | 5.48                          | 0.4824                            | 7.284 | 0.075              | 7.133   | 7.23            | 7.283  | 7.331           | 7.474                   |         |
| INVS     | 3iRlovitKJyinoHnXU  | rs10124133 | 6.63                         | 6.33             | -0.134               | 1.1                      | 38.53                         | 0.335                             | 7.23  | 0.066              | 7.112   | 7.179           | 7.223  | 7.276           | 7.432                   |         |
| INVS     | TJe1TJfXdHH9ek3Dk   | rs10124133 | 3.78                         | 3.62             | -0.075               | 1.04                     | 38.53                         | 0.335                             | 7.284 | 0.075              | 7.133   | 7.23            | 7.283  | 7.331           | 7.474                   |         |
| INVS     | 3iRlovitKJyinoHnXU  | rs944710   | 4.13                         | 3.95             | 0.08                 | 1.52                     | 49.03                         | 0.48                              | 7.23  | 0.066              | 7.112   | 7.179           | 7.223  | 7.276           | 7.432                   |         |
| IPO5     | KnqRznCR.qJCBdcX1I  | rs7993717  | 3.33                         | 3.19             | 0.062                | 0.51                     | 25.11                         | 0.46                              | 7.736 | 0.157              | 7.174   | 7.659           | 7.738  | 7.836           | 8.064                   |         |
| IPO8     | ZXeddX1QpPgng7IB6Q  | rs794161   | 6.75                         | 6.45             | 0.137                | 2.72                     | -47.52                        | 0.1225                            | 9.08  | 0.482              | 8.044   | 8.65            | 9.174  | 9.339           | 10.509                  | Yes     |
| IPO8     | ZXeddX1QpPgng7IB6Q  | rs1258276  | 3.43                         | 3.29             | 0.065                | 2.44                     | -28.5                         | 0.3725                            | 9.08  | 0.482              | 8.044   | 8.65            | 9.174  | 9.339           | 10.509                  | Yes     |
| IPO8     | ZXeddX1QpPgng7IB6Q  | rs2352210  | 35.04                        | 33.37            | -0.568               | 12.42                    | -0.09                         | 0.3719                            | 9.08  | 0.482              | 8.044   | 8.65            | 9.174  | 9.339           | 10.509                  | Yes     |
| IPO8     | ZXeddX1QpPgng7IB6Q  | rs3888018  | 12.56                        | 11.98            | -0.249               | 2.27                     | 1.62                          | 0.27                              | 9.08  | 0.482              | 8.044   | 8.65            | 9.174  | 9.339           | 10.509                  | Yes     |
| IPO8     | ZXeddX1QpPgng7IB6Q  | rs33270    | 5.6                          | 5.36             | 0.109                | 4.07                     | 3.84                          | 0.12                              | 9.08  | 0.482              | 8.044   | 8.65            | 9.174  | 9.339           | 10.509                  | Yes     |
| IPO8     | ZXeddX1QpPgng7IB6Q  | rs794152   | 21.14                        | 20.15            | -0.38                | 10.6                     | 14.27                         | 0.32                              | 9.08  | 0.482              | 8.044   | 8.65            | 9.174  | 9.339           | 10.509                  | Yes     |
| IPO8     | ZXeddX1QpPgng7IB6Q  | rs3910564  | 75.73                        | 72.06            | 0.844                | 14.14                    | 18.43                         | 0.4472                            | 9.08  | 0.482              | 8.044   | 8.65            | 9.174  | 9.339           | 10.509                  | Yes     |
| IPO8     | ZXeddX1QpPgng7IB6Q  | rs6487926  | 32.61                        | 31.06            | 0.559                | 11.15                    | 28.9                          | 0.3691                            | 9.08  | 0.482              | 8.044   | 8.65            | 9.174  | 9.339           | 10.509                  | Yes     |
| IPO8     | ZXeddX1QpPgng7IB6Q  | rs10843803 | 9.35                         | 8.93             | -0.196               | 1.25                     | 30.91                         | 0.231                             | 9.08  | 0.482              | 8.044   | 8.65            | 9.174  | 9.339           | 10.509                  | Yes     |
| IPO8     | ZXeddX1QpPgng7IB6Q  | rs6487927  | 73.06                        | 69.53            | 0.834                | 14.03                    | -22.42                        | 0.45                              | 9.08  | 0.482              | 8.044   | 8.65            | 9.174  | 9.339           | 10.509                  | Yes     |
| IPO8     | ZXeddX1QpPgng7IB6Q  | rs2882856  | 4.45                         | 4.26             | -0.087               | 0.95                     | 12.53                         | 0.0584                            | 9.08  | 0.482              | 8.044   | 8.65            | 9.174  | 9.339           | 10.509                  | Yes     |
| IPO8     | ZXeddX1QpPgng7IB6Q  | rs7297455  | 71.29                        | 67.84            | -0.829               | 13.81                    | 16.17                         | 0.4525                            | 9.08  | 0.482              | 8.044   | 8.65            | 9.174  | 9.339           | 10.509                  | Yes     |
| IPO8     | ZXeddX1QpPgng7IB6Q  | rs2304630  | 33.72                        | 32.11            | 0.554                | 11.89                    | 33.06                         | 0.385                             | 9.08  | 0.482              | 8.044   | 8.65            | 9.174  | 9.339           | 10.509                  | Yes     |
| IPO8     | ZXeddX1QpPgng7IB6Q  | rs10843824 | 4.93                         | 4.72             | 0.098                | 4.21                     | 36.72                         | 0.3518                            | 9.08  | 0.482              | 8.044   | 8.65            | 9.174  | 9.339           | 10.509                  | Yes     |
| IPO8     | ZXeddX1QpPgng7IB6Q  | rs11613738 | 5.66                         | 5.41             | -0.112               | 1.46                     | 37.68                         | 0.075                             | 9.08  | 0.482              | 8.044   | 8.65            | 9.174  | 9.339           | 10.509                  | Yes     |
| IPO8     | ZXeddX1QpPgng7IB6Q  | rs12146709 | 14.78                        | 14.09            | 0.287                | 6.85                     | 39.25                         | 0.28                              | 9.08  | 0.482              | 8.044   | 8.65            | 9.174  | 9.339           | 10.509                  | Yes     |
| IQCB1    | rojzPr3l3pOeshypTU  | rs6766694  | 4.91                         | 4.69             | -0.094               | 4.36                     | 12.22                         | 0.3442                            | 9.819 | 0.276              | 9.019   | 9.62            | 9.848  | 10.014          | 10.463                  |         |
| IQCB1    | rojzPr3l3pOeshypTU  | rs6795182  | 4.91                         | 4.69             | 0.094                | 3.82                     | 17.03                         | 0.3442                            | 9.819 | 0.276              | 9.019   | 9.62            | 9.848  | 10.014          | 10.463                  |         |
| IQCB1    | rojzPr3l3pOeshypTU  | rs6808500  | 4.73                         | 4.52             | 0.09                 | 4.25                     | 21.03                         | 0.3475                            | 9.819 | 0.276              | 9.019   | 9.62            | 9.848  | 10.014          | 10.463                  |         |
| IQCB1    | rojzPr3l3pOeshypTU  | rs6438678  | 4.83                         | 4.62             | 0.092                | 4.34                     | -12.49                        | 0.35                              | 9.819 | 0.276              | 9.019   | 9.62            | 9.848  | 10.014          | 10.463                  |         |
| IQCB1    | rojzPr3l3pOeshypTU  | rs1920296  | 4.83                         | 4.62             | 0.092                | 4.34                     | -10.3                         | 0.35                              | 9.819 | 0.276              | 9.019   | 9.62            | 9.848  | 10.014          | 10.463                  |         |
| IQCB1    | rojzPr3l3pOeshypTU  | rs9826473  | 4.14                         | 3.97             | 0.078                | 5.98                     | 2.35                          | 0.29                              | 9.819 | 0.276              | 9.019   | 9.62            | 9.848  | 10.014          | 10.463                  |         |
| IQCB1    | rojzPr3l3pOeshypTU  | rs9884018  | 3.7                          | 3.54             | 0.069                | 2.06                     | 9.48                          | 0.12                              | 9.819 | 0.276              | 9.019   | 9.62            | 9.848  | 10.014          | 10.463                  |         |
| IQCB1    | rojzPr3l3pOeshypTU  | rs6767409  | 4.91                         | 4.70             | -0.092               | 4.93                     | 11.12                         | 0.402                             | 9.819 | 0.276              | 9.019   | 9.62            | 9.848  | 10.014          | 10.463                  |         |
| IQCG     | fnf3SSBAovR6fJxLhk  | rs1985077  | 3.59                         | 3.43             | -0.067               | 0.53                     | -28.65                        | 0.105                             | 7.693 | 0.172              | 7.181   | 7.572           | 7.692  | 7.806           | 8.171                   |         |
| IQCG     | fnf3SSBAovR6fJxLhk  | rs7634881  | 4.57                         | 4.37             | 0.087                | 0.62                     | 15.22                         | 0.0825                            | 7.693 | 0.172              | 7.181   | 7.572           | 7.692  | 7.806           | 8.171                   |         |
| IQCG     | fnf3SSBAovR6fJxLhk  | rs9820771  | 3.37                         | 3.23             | -0.063               | 1.39                     | -12.74                        | 0.17                              | 7.693 | 0.172              | 7.181   | 7.572           | 7.692  | 7.806           | 8.171                   |         |
| IQCG     | fnf3SSBAovR6fJxLhk  | rs9863880  | 5.32                         | 5.08             | 0.103                | 1.25                     | -12.45                        | 0.0975                            | 7.693 | 0.172              | 7.181   | 7.572           | 7.692  | 7.806           | 8.171                   |         |
| IRAK1BP1 | rYaQl7fvnviDm6ZAnQ  | rs2174743  | 4.6                          | 4.41             | 0.091                | 2.87                     | 14.62                         | 0.49                              | 7.469 | 0.205              | 7.119   | 7.337           | 7.442  | 7.557           | 8.46                    |         |
| IRAK1BP1 | rYaQl7fvnviDm6ZAnQ  | rs10943605 | 4.6                          | 4.41             | 0.091                | 2.81                     | 47.16                         | 0.49                              | 7.469 | 0.205              | 7.119   | 7.337           | 7.442  | 7.557           | 8.46                    |         |
| IREB2    | ITP0kv5R7h7ekJVSOc  | rs8034191  | 3.8                          | 3.64             | 0.07                 | 0.77                     | 14.56                         | 0.35                              | 8.348 | 0.294              | 7.611   | 8.179           | 8.395  | 8.539           | 9.008                   |         |
| IRF2     | 3zdEkR0kVX3eVPVSc   | rs965225   | 3.29                         | 3.15             | 0.061                | 1.56                     | 7.98                          | 0.1025                            | 7.864 | 0.28               | 7.267   | 7.707           | 7.822  | 7.97            | 9.356                   |         |
| IRF5     | Zpen3qeOrS_pffAR0U  | rs4728142  | 8.01                         | 7.65             | 0.16                 | 4.77                     | -4.03                         | 0.47                              | 7.529 | 0.43               | 7.113   | 7.198           | 7.389  | 7.68            | 9.207                   |         |
| IRF5     | Zpen3qeOrS_pffAR0U  | rs7808907  | 11.49                        | 10.96            | 0.232                | 5.65                     | -6                            | 0.49                              | 7.529 | 0.43               | 7.113   | 7.198           | 7.389  | 7.68            | 9.207                   |         |
| IRF5     | Zpen3qeOrS_pffAR0U  | rs10488630 | 8.39                         | 8.01             | -0.172               | 3.53                     | 3.86                          | 0.4075                            | 7.529 | 0.43               | 7.113   | 7.198           | 7.389  | 7.68            | 9.207                   |         |
| IRF5     | Zpen3qeOrS_pffAR0U  | rs1874332  | 13.36                        | 12.74            | -0.27                | 4.81                     | 24.52                         | 0.4598                            | 7.529 | 0.43               | 7.113   | 7.198           | 7.389  | 7.68            | 9.207                   |         |
| IRF5     | Zpen3qeOrS_pffAR0U  | rs7789433  | 13.08                        | 12.48            | -0.259               | 6.36                     | 31.11                         | 0.325                             | 7.529 | 0.43               | 7.113   | 7.198           | 7.389  | 7.68            | 9.207                   |         |
| IRF5     | Zpen3qeOrS_pffAR0U  | rs1154330  | 3.87                         | 3.70             | 0.074                | 3.52                     | 35.7                          | 0.1525                            | 7.529 | 0.43               | 7.113   | 7.198           | 7.389  | 7.68            | 9.207                   |         |

| Symbol   | Lumi nuID          | SNP        | Population-based association |                  | % Variance Explained | Family-based association |                               | Transcript abundance (log2 scale) |        |                    |         |                 |        |                 | SNP mapping under probe |         |
|----------|--------------------|------------|------------------------------|------------------|----------------------|--------------------------|-------------------------------|-----------------------------------|--------|--------------------|---------|-----------------|--------|-----------------|-------------------------|---------|
|          |                    |            | p-value (-log10)             | p-value (-log10) |                      | p-value (-log10)         | Distance from transcript (kb) | MAF                               | Mean   | Standard Deviation | Minimum | 25th percentile | Median | 75th percentile |                         | Maximum |
| IRS1     | ELieO5UUW7TiOr8d0  | rs1882575  | 3.85                         | 3.68             | 0.072                | 0.57                     | -33.19                        | 0.095                             | 7.223  | 0.101              | 7.101   | 7.15            | 7.194  | 7.268           | 7.61                    |         |
| IRS1     | ELieO5UUW7TiOr8d0  | rs1317063  | 4.74                         | 4.54             | -0.092               | 0.97                     | -25.72                        | 0.0775                            | 7.223  | 0.101              | 7.101   | 7.15            | 7.194  | 7.268           | 7.61                    |         |
| IRS1     | ELieO5UUW7TiOr8d0  | rs2178704  | 5.77                         | 5.52             | 0.112                | 0.87                     | -20.73                        | 0.1175                            | 7.223  | 0.101              | 7.101   | 7.15            | 7.194  | 7.268           | 7.61                    |         |
| IRS1     | ELieO5UUW7TiOr8d0  | rs10205923 | 7.42                         | 7.09             | -0.152               | 1.23                     | 14.62                         | 0.0675                            | 7.223  | 0.101              | 7.101   | 7.15            | 7.194  | 7.268           | 7.61                    |         |
| IRS1     | ELieO5UUW7TiOr8d0  | rs1560251  | 7.25                         | 6.93             | -0.151               | 2.24                     | -10.53                        | 0.0975                            | 7.223  | 0.101              | 7.101   | 7.15            | 7.194  | 7.268           | 7.61                    |         |
| IRS1     | ELieO5UUW7TiOr8d0  | rs6725556  | 3.87                         | 3.71             | 0.074                | 0.95                     | 2.52                          | 0.065                             | 7.223  | 0.101              | 7.101   | 7.15            | 7.194  | 7.268           | 7.61                    |         |
| ISCA2    | o.V1HS5wp411i57xd1 | rs1125221  | 7.48                         | 7.15             | 0.154                | 6.35                     | -47.64                        | 0.4369                            | 10.981 | 0.269              | 10.297  | 10.786          | 10.981 | 11.154          | 11.957                  |         |
| ISCA2    | o.V1HS5wp411i57xd1 | rs2190876  | 8.96                         | 8.55             | -0.183               | 6.12                     | -28.2                         | 0.395                             | 10.981 | 0.269              | 10.297  | 10.786          | 10.981 | 11.154          | 11.957                  |         |
| ISCA2    | o.V1HS5wp411i57xd1 | rs3784035  | 3.58                         | 3.43             | 0.068                | 0.81                     | -11.54                        | 0.1575                            | 10.981 | 0.269              | 10.297  | 10.786          | 10.981 | 11.154          | 11.957                  |         |
| ISCA2    | o.V1HS5wp411i57xd1 | rs10148268 | 3.58                         | 3.43             | 0.068                | 0.81                     | -9.5                          | 0.1575                            | 10.981 | 0.269              | 10.297  | 10.786          | 10.981 | 11.154          | 11.957                  |         |
| ISCA2    | o.V1HS5wp411i57xd1 | rs7148018  | 18.16                        | 17.31            | 0.352                | 9.11                     | -3.31                         | 0.44                              | 10.981 | 0.269              | 10.297  | 10.786          | 10.981 | 11.154          | 11.957                  |         |
| ISCA2    | o.V1HS5wp411i57xd1 | rs4899516  | 3.32                         | 3.18             | 0.062                | 0.66                     | -0.94                         | 0.1475                            | 10.981 | 0.269              | 10.297  | 10.786          | 10.981 | 11.154          | 11.957                  |         |
| ISCA2    | o.V1HS5wp411i57xd1 | rs1468503  | 11.23                        | 10.72            | 0.231                | 6.47                     | -0.82                         | 0.2975                            | 10.981 | 0.269              | 10.297  | 10.786          | 10.981 | 11.154          | 11.957                  |         |
| ISCA2    | o.V1HS5wp411i57xd1 | rs3759745  | 3.32                         | 3.18             | -0.062               | 0.6                      | 0.5                           | 0.1475                            | 10.981 | 0.269              | 10.297  | 10.786          | 10.981 | 11.154          | 11.957                  |         |
| ISCA2    | o.V1HS5wp411i57xd1 | rs11159087 | 3.34                         | 3.20             | -0.062               | 1.02                     | 9.2                           | 0.145                             | 10.981 | 0.269              | 10.297  | 10.786          | 10.981 | 11.154          | 11.957                  |         |
| ISCA2    | o.V1HS5wp411i57xd1 | rs2302114  | 7.72                         | 7.37             | 0.163                | 4.99                     | 21.67                         | 0.4623                            | 10.981 | 0.269              | 10.297  | 10.786          | 10.981 | 11.154          | 11.957                  |         |
| ISCA2    | o.V1HS5wp411i57xd1 | rs699370   | 4.81                         | 4.60             | -0.097               | 4.4                      | 26.95                         | 0.3425                            | 10.981 | 0.269              | 10.297  | 10.786          | 10.981 | 11.154          | 11.957                  |         |
| ISCA2    | o.V1HS5wp411i57xd1 | rs862037   | 4.13                         | 3.95             | -0.081               | 2.65                     | 28.23                         | 0.36                              | 10.981 | 0.269              | 10.297  | 10.786          | 10.981 | 11.154          | 11.957                  |         |
| ISCA2    | o.V1HS5wp411i57xd1 | rs3815328  | 4.86                         | 4.65             | 0.097                | 3.33                     | 30.21                         | 0.345                             | 10.981 | 0.269              | 10.297  | 10.786          | 10.981 | 11.154          | 11.957                  |         |
| ITGB1BP1 | ZeneCFEjKJDigxJe6s | rs2709576  | 3.72                         | 3.66             | -0.072               | 2.56                     | -46.44                        | 0.325                             | 10.509 | 0.49               | 7.243   | 10.314          | 10.536 | 10.796          | 11.374                  |         |
| ITGB1BP1 | ZeneCFEjKJDigxJe6s | rs4798     | 4.01                         | 3.84             | 0.077                | 2.56                     | 0.99                          | 0.1975                            | 10.509 | 0.49               | 7.243   | 10.314          | 10.536 | 10.796          | 11.374                  |         |
| ITGB1BP1 | ZeneCFEjKJDigxJe6s | rs10169262 | 3.89                         | 3.72             | 0.074                | 2.36                     | 3.94                          | 0.2                               | 10.509 | 0.49               | 7.243   | 10.314          | 10.536 | 10.796          | 11.374                  |         |
| ITGB1BP1 | ZeneCFEjKJDigxJe6s | rs10176656 | 3.52                         | 3.37             | 0.066                | 2.13                     | 24.46                         | 0.2025                            | 10.509 | 0.49               | 7.243   | 10.314          | 10.536 | 10.796          | 11.374                  |         |
| ITGB3BP  | rSh9DECTRn_EnOD18  | rs6697508  | 15.43                        | 14.71            | -0.303               | 5.53                     | -13.07                        | 0.28                              | 8.192  | 0.273              | 7.552   | 7.993           | 8.207  | 8.384           | 8.931                   |         |
| ITGB3BP  | rSh9DECTRn_EnOD18  | rs3004318  | 9.76                         | 9.32             | 0.196                | 5.38                     | -5.72                         | 0.4925                            | 8.192  | 0.273              | 7.552   | 7.993           | 8.207  | 8.384           | 8.931                   |         |
| ITGB3BP  | rSh9DECTRn_EnOD18  | rs3009577  | 8.87                         | 8.47             | -0.176               | 3.72                     | 7.66                          | 0.3275                            | 8.192  | 0.273              | 7.552   | 7.993           | 8.207  | 8.384           | 8.931                   |         |
| ITGB3BP  | rSh9DECTRn_EnOD18  | rs6588044  | 8.87                         | 8.47             | 0.176                | 3.72                     | -30.53                        | 0.3275                            | 8.192  | 0.273              | 7.552   | 7.993           | 8.207  | 8.384           | 8.931                   |         |
| ITGB3BP  | rSh9DECTRn_EnOD18  | rs217478   | 8.87                         | 8.47             | 0.176                | 3.72                     | 2.43                          | 0.3275                            | 8.192  | 0.273              | 7.552   | 7.993           | 8.207  | 8.384           | 8.931                   |         |
| ITI4     | luIA1ypdBdk14F8k24 | rs17331151 | 7.07                         | 6.75             | -0.138               | 2.87                     | -2.47                         | 0.1055                            | 7.988  | 0.485              | 7.183   | 7.6             | 7.864  | 8.314           | 9.809                   |         |
| ITI4     | luIA1ypdBdk14F8k24 | rs4687657  | 4.3                          | 4.11             | 0.08                 | 1.62                     | 5.53                          | 0.2825                            | 7.988  | 0.485              | 7.183   | 7.6             | 7.864  | 8.314           | 9.809                   |         |
| ITI4     | luIA1ypdBdk14F8k24 | rs4687554  | 4.8                          | 4.59             | -0.091               | 1.93                     | -0.56                         | 0.2375                            | 7.988  | 0.485              | 7.183   | 7.6             | 7.864  | 8.314           | 9.809                   |         |
| ITI4     | luIA1ypdBdk14F8k24 | rs11626    | 5.92                         | 5.66             | -0.113               | 3.1                      | 9.29                          | 0.165                             | 7.988  | 0.485              | 7.183   | 7.6             | 7.864  | 8.314           | 9.809                   |         |
| ITI4     | luIA1ypdBdk14F8k24 | rs6445539  | 5.71                         | 5.46             | -0.108               | 2.36                     | 9.6                           | 0.25                              | 7.988  | 0.485              | 7.183   | 7.6             | 7.864  | 8.314           | 9.809                   |         |
| ITI4     | luIA1ypdBdk14F8k24 | rs11130329 | 3.61                         | 3.46             | -0.066               | 2.19                     | 32.16                         | 0.16                              | 7.988  | 0.485              | 7.183   | 7.6             | 7.864  | 8.314           | 9.809                   |         |
| ITPR3    | oKnieZ_bp79OFn7.3U | rs2296341  | 3.35                         | 3.21             | -0.063               | 0.57                     | -36.77                        | 0.1884                            | 11.208 | 0.387              | 9.856   | 10.983          | 11.201 | 11.453          | 12.545                  | Yes     |
| ITPR3    | oKnieZ_bp79OFn7.3U | rs4711338  | 3.57                         | 3.42             | 0.066                | 1.36                     | -4.15                         | 0.47                              | 11.208 | 0.387              | 9.856   | 10.983          | 11.201 | 11.453          | 12.545                  | Yes     |
| ITR      | oO3ZwwVSc_3vu9J4jk | rs726298   | 6.62                         | 6.33             | 0.133                | 2.13                     | -42.62                        | 0.385                             | 8.052  | 0.215              | 7.172   | 7.93            | 8.076  | 8.177           | 8.504                   |         |
| ITR      | oO3ZwwVSc_3vu9J4jk | rs9301977  | 5.32                         | 5.09             | -0.105               | 0.62                     | -41.23                        | 0.3725                            | 8.052  | 0.215              | 7.172   | 7.93            | 8.076  | 8.177           | 8.504                   |         |
| ITR      | oO3ZwwVSc_3vu9J4jk | rs7339106  | 7.29                         | 6.96             | -0.141               | 1.05                     | -30.25                        | 0.3175                            | 8.052  | 0.215              | 7.172   | 7.93            | 8.076  | 8.177           | 8.504                   |         |
| ITR      | oO3ZwwVSc_3vu9J4jk | rs9561636  | 3.36                         | 3.22             | -0.064               | 2.12                     | -22.92                        | 0.255                             | 8.052  | 0.215              | 7.172   | 7.93            | 8.076  | 8.177           | 8.504                   |         |
| ITR      | oO3ZwwVSc_3vu9J4jk | rs7330873  | 6.99                         | 6.68             | -0.143               | 1.01                     | -18.27                        | 0.3105                            | 8.052  | 0.215              | 7.172   | 7.93            | 8.076  | 8.177           | 8.504                   |         |
| ITR      | oO3ZwwVSc_3vu9J4jk | rs9556403  | 7.14                         | 6.82             | 0.141                | 2.27                     | -17.33                        | 0.4025                            | 8.052  | 0.215              | 7.172   | 7.93            | 8.076  | 8.177           | 8.504                   |         |
| ITR      | oO3ZwwVSc_3vu9J4jk | rs9561641  | 4.54                         | 4.34             | 0.086                | 0.67                     | -3.63                         | 0.2675                            | 8.052  | 0.215              | 7.172   | 7.93            | 8.076  | 8.177           | 8.504                   |         |
| ITR      | oO3ZwwVSc_3vu9J4jk | rs9524555  | 7.51                         | 7.17             | -0.149               | 1.25                     | 5.38                          | 0.3265                            | 8.052  | 0.215              | 7.172   | 7.93            | 8.076  | 8.177           | 8.504                   |         |
| ITR      | oO3ZwwVSc_3vu9J4jk | rs1572935  | 5.14                         | 4.92             | 0.099                | 1.19                     | -9.39                         | 0.2437                            | 8.052  | 0.215              | 7.172   | 7.93            | 8.076  | 8.177           | 8.504                   |         |
| ITR      | oO3ZwwVSc_3vu9J4jk | rs6492725  | 3.8                          | 3.64             | -0.071               | 1.62                     | 3.63                          | 0.405                             | 8.052  | 0.215              | 7.172   | 7.93            | 8.076  | 8.177           | 8.504                   |         |
| ITSN1    | HJLb564Xve5_DueDU  | rs2248815  | 4.61                         | 4.41             | 0.088                | 0                        | -123.28                       | 0.1925                            | 7.102  | 0.006              | 7.089   | 7.099           | 7.102  | 7.106           | 7.121                   |         |
| JAG2     | uCduELI9ESFXZB7UZs | rs2072673  | 3.69                         | 3.53             | 0.067                | 0.47                     | -10.47                        | 0.37                              | 7.327  | 0.134              | 7.13    | 7.234           | 7.296  | 7.389           | 8.113                   |         |
| JAG2     | uCduELI9ESFXZB7UZs | rs11625865 | 3.3                          | 3.16             | 0.06                 | 0.6                      | 9.26                          | 0.3819                            | 7.327  | 0.134              | 7.13    | 7.234           | 7.296  | 7.389           | 8.113                   |         |
| JAKMIP2  | rRS4iojQCclHFeyUoc | rs6895278  | 3.31                         | 3.17             | -0.062               | 2.22                     | -40.23                        | 0.325                             | 7.544  | 0.207              | 7.183   | 7.378           | 7.522  | 7.678           | 8.089                   |         |
| JAKMIP2  | rRS4iojQCclHFeyUoc | rs1016104  | 12.22                        | 11.66            | -0.243               | 4.81                     | -23.52                        | 0.355                             | 7.544  | 0.207              | 7.183   | 7.378           | 7.522  | 7.678           | 8.089                   |         |
| JAKMIP2  | rRS4iojQCclHFeyUoc | rs2436340  | 21.47                        | 20.45            | -0.402               | 7.4                      | 0.22                          | 0.3725                            | 7.544  | 0.207              | 7.183   | 7.378           | 7.522  | 7.678           | 8.089                   |         |
| JAM3     | 0g7h0ldiljGKe495f4 | rs11223716 | 3.79                         | 3.62             | 0.072                | 1.92                     | -1.43                         | 0.345                             | 8.816  | 0.291              | 8.097   | 8.612           | 8.823  | 9.009           | 10.07                   |         |
| JAM3     | 0g7h0ldiljGKe495f4 | rs11606866 | 4.37                         | 4.19             | -0.084               | 0.76                     | 18.31                         | 0.14                              | 8.816  | 0.291              | 8.097   | 8.612           | 8.823  | 9.009           | 10.07                   |         |
| JAM3     | 0g7h0ldiljGKe495f4 | rs12573858 | 4.2                          | 4.02             | -0.08                | 0.76                     | 43.02                         | 0.1382                            | 8.816  | 0.291              | 8.097   | 8.612           | 8.823  | 9.009           | 10.07                   |         |
| JMJD4    | fVJXthfY1JP.0vpV4  | rs12138229 | 4.96                         | 4.75             | -0.098               | 2.61                     | -18.8                         | 0.1825                            | 8.128  | 0.353              | 7.394   | 7.859           | 8.104  | 8.373           | 9.049                   |         |
| JMJD4    | fVJXthfY1JP.0vpV4  | rs12097239 | 5.35                         | 5.12             | -0.109               | 2.69                     | -6.46                         | 0.2125                            | 8.128  | 0.353              | 7.394   | 7.859           | 8.104  | 8.373           | 9.049                   |         |
| JMJD4    | fVJXthfY1JP.0vpV4  | rs2236359  | 4.19                         | 4.01             | 0.082                | 3.62                     | 12.33                         | 0.4171                            | 8.128  | 0.353              | 7.394   | 7.859           | 8.104  | 8.373           | 9.049                   |         |
| JMJD4    | fVJXthfY1JP.0vpV4  | rs10916205 | 4.21                         | 4.03             | 0.082                | 3.6                      | 34.48                         | 0.415                             | 8.128  | 0.353              | 7.394   | 7.859           | 8.104  | 8.373           | 9.049                   |         |
| JUP      | xjJ93dSmy_n_VFXQ   | rs11079013 | 17.45                        | 16.63            | -0.327               | 2.57                     | 4.26                          | 0.095                             | 7.726  | 0.64               | 7.114   | 7.304           | 7.478  | 8.042           | 10.872                  |         |
| JUP      | 3K4Roun4n3qjkrUWJU | rs11079013 | 5.77                         | 5.51             | -0.114               | 1.67                     | 4.26                          | 0.095                             | 7.726  | 0.64               | 7.114   | 7.304           | 7.478  | 8.042           | 10.872                  |         |
| JUP      | xjJ93dSmy_n_VFXQ   | rs4796712  | 7.88                         | 7.52             | 0.158                | 2.19                     | 44.18                         | 0.1225                            | 7.726  | 0.64               | 7.114   | 7.304           | 7.478  | 8.042           | 10.872                  |         |

| Symbol   | Lumi nuID           | SNP        | Population-based | Population-based             | % Variance | Family-based     | Distance from   | MAF    | Mean      | Transcript abundance (log2 scale) |            |            |            |         | SNP    |         |
|----------|---------------------|------------|------------------|------------------------------|------------|------------------|-----------------|--------|-----------|-----------------------------------|------------|------------|------------|---------|--------|---------|
|          |                     |            | association      | association                  |            | association      |                 |        |           | Standard                          | 25th       | Median     | 75th       | Maximum |        | mapping |
|          |                     |            | p-value (-log10) | p-value (-log10),<br>GC adj. | Explained  | p-value (-log10) | transcript (kb) |        | Deviation | Minimum                           | percentile | percentile | percentile | Maximum | under  |         |
|          |                     |            |                  |                              |            |                  |                 |        |           |                                   |            |            |            |         | probe  |         |
| JUP      | 3K4Roun4n3qjkrUWJU  | rs4796712  | 4.76             | 4.56                         | 0.094      | 1.46             | 44.18           | 0.1225 | 7.147     | 0.04                              | 7.099      | 7.119      | 7.136      | 7.16    | 7.381  |         |
| KBTD11   | NrAcRe_CIC9KknvuN4  | rs9650491  | 8.7              | 8.31                         | -0.171     | 5.4              | 2.19            | 0.07   | 9.456     | 0.356                             | 8.454      | 9.206      | 9.482      | 9.699   | 10.457 |         |
| KBTD11   | NrAcRe_CIC9KknvuN4  | rs1043221  | 3.79             | 3.63                         | 0.069      | 3.19             | -2.06           | 0.1275 | 9.456     | 0.356                             | 8.454      | 9.206      | 9.482      | 9.699   | 10.457 |         |
| KCNJ4    | KGZohVCFRmSFiaSWql  | rs2269609  | 3.98             | 3.81                         | -0.08      | 0.33             | 13.26           | 0.1075 | 7.559     | 0.191                             | 7.193      | 7.43       | 7.55       | 7.67    | 8.796  |         |
| KCNK17   | WE7Xq4TqO4f2rtqkk4  | rs1544050  | 5.81             | 5.55                         | 0.115      | 1.78             | -3.07           | 0.3889 | 7.249     | 0.178                             | 7.096      | 7.139      | 7.188      | 7.277   | 8.263  |         |
| KCNK17   | WE7Xq4TqO4f2rtqkk4  | rs11756091 | 8.46             | 8.08                         | -0.165     | 3.57             | 0.61            | 0.49   | 7.249     | 0.178                             | 7.096      | 7.139      | 7.188      | 7.277   | 8.263  |         |
| KCNK17   | WE7Xq4TqO4f2rtqkk4  | rs3734618  | 8.33             | 7.95                         | -0.163     | 3.55             | 1.99            | 0.49   | 7.249     | 0.178                             | 7.096      | 7.139      | 7.188      | 7.277   | 8.263  |         |
| KCNK17   | WE7Xq4TqO4f2rtqkk4  | rs1109798  | 5.25             | 5.02                         | 0.104      | 3.83             | 7.68            | 0.405  | 7.249     | 0.178                             | 7.096      | 7.139      | 7.188      | 7.277   | 8.263  |         |
| KCNK17   | WE7Xq4TqO4f2rtqkk4  | rs3807045  | 5.15             | 4.92                         | 0.102      | 3.3              | 8.46            | 0.402  | 7.249     | 0.178                             | 7.096      | 7.139      | 7.188      | 7.277   | 8.263  |         |
| KCNK17   | WE7Xq4TqO4f2rtqkk4  | rs1328384  | 6.35             | 6.07                         | 0.126      | 3.31             | 9.61            | 0.42   | 7.249     | 0.178                             | 7.096      | 7.139      | 7.188      | 7.277   | 8.263  |         |
| KCNK9    | 0oLW.KoHB5E9Ciptbo  | rs2542443  | 3.4              | 3.26                         | -0.068     | 0.07             | -33.22          | 0.1035 | 7.243     | 0.094                             | 7.134      | 7.194      | 7.224      | 7.255   | 7.77   |         |
| KCNMB3   | T6X0eHecrriePvpOul  | rs7614305  | 3.67             | 3.51                         | -0.069     | 0.44             | -47.93          | 0.23   | 7.372     | 0.12                              | 7.132      | 7.297      | 7.363      | 7.436   | 8.071  |         |
| KCNMB4   | 9EKPXngt4F8e7BXS.U  | rs17108108 | 4.39             | 4.20                         | -0.086     | 0.71             | -27.06          | 0.075  | 7.506     | 0.128                             | 7.164      | 7.424      | 7.488      | 7.56    | 8.121  |         |
| KCNN4    | HumVXrqEECKEU.9S.J4 | rs670950   | 4.85             | 4.64                         | -0.093     | 1.04             | -3.85           | 0.101  | 9.018     | 0.367                             | 8.087      | 8.797      | 8.977      | 9.236   | 10.479 |         |
| KCNN4    | HumVXrqEECKEU.9S.J4 | rs3760982  | 5.52             | 5.28                         | -0.105     | 2.81             | 1.1             | 0.4375 | 9.018     | 0.367                             | 8.087      | 8.797      | 8.977      | 9.236   | 10.479 |         |
| KCNN4    | HumVXrqEECKEU.9S.J4 | rs1386502  | 4.32             | 4.13                         | 0.082      | 1.43             | 7.95            | 0.435  | 9.018     | 0.367                             | 8.087      | 8.797      | 8.977      | 9.236   | 10.479 |         |
| KCNN4    | HumVXrqEECKEU.9S.J4 | rs10426528 | 8.53             | 8.15                         | 0.167      | 3.08             | 13.89           | 0.3788 | 9.018     | 0.367                             | 8.087      | 8.797      | 8.977      | 9.236   | 10.479 |         |
| KCNN4    | HumVXrqEECKEU.9S.J4 | rs187008   | 4.25             | 4.07                         | -0.08      | 1.2              | 20.46           | 0.0925 | 9.018     | 0.367                             | 8.087      | 8.797      | 8.977      | 9.236   | 10.479 |         |
| KCNN4    | HumVXrqEECKEU.9S.J4 | rs2356401  | 3.84             | 3.67                         | 0.074      | 0.99             | 36.44           | 0.3975 | 9.018     | 0.367                             | 8.087      | 8.797      | 8.977      | 9.236   | 10.479 |         |
| KCNT1    | K4TSiZRxm1.nnr18es  | rs487750   | 3.37             | 3.23                         | 0.066      | 1.57             | 9.7             | 0.3756 | 7.185     | 0.072                             | 7.101      | 7.14       | 7.167      | 7.206   | 7.577  |         |
| KCNT1    | K4TSiZRxm1.nnr18es  | rs7029951  | 3.45             | 3.30                         | -0.073     | 2.01             | 2.7             | 0.2337 | 7.185     | 0.072                             | 7.101      | 7.14       | 7.167      | 7.206   | 7.577  |         |
| KCTD10   | xQSY9KFQu4EEdJWV3o  | rs9943753  | 3.48             | 3.33                         | 0.067      | 1.52             | -45.52          | 0.3575 | 8.894     | 0.339                             | 8.228      | 8.636      | 8.846      | 9.159   | 9.778  |         |
| KCTD10   | xQSY9KFQu4EEdJWV3o  | rs4766594  | 6.98             | 6.66                         | -0.14      | 2.27             | -43.84          | 0.29   | 8.894     | 0.339                             | 8.228      | 8.636      | 8.846      | 9.159   | 9.778  |         |
| KCTD10   | xQSY9KFQu4EEdJWV3o  | rs10850135 | 21.66            | 20.64                        | -0.396     | 6.62             | -19.93          | 0.295  | 8.894     | 0.339                             | 8.228      | 8.636      | 8.846      | 9.159   | 9.778  |         |
| KCTD10   | xQSY9KFQu4EEdJWV3o  | rs2075432  | 13.66            | 13.03                        | 0.268      | 5.64             | -12.23          | 0.465  | 8.894     | 0.339                             | 8.228      | 8.636      | 8.846      | 9.159   | 9.778  |         |
| KCTD10   | xQSY9KFQu4EEdJWV3o  | rs10850141 | 18.07            | 17.23                        | 0.335      | 5.84             | -10.33          | 0.335  | 8.894     | 0.339                             | 8.228      | 8.636      | 8.846      | 9.159   | 9.778  |         |
| KCTD10   | xQSY9KFQu4EEdJWV3o  | rs7132057  | 23.66            | 22.54                        | 0.425      | 6.86             | -6.18           | 0.305  | 8.894     | 0.339                             | 8.228      | 8.636      | 8.846      | 9.159   | 9.778  |         |
| KCTD10   | xQSY9KFQu4EEdJWV3o  | rs3825393  | 6.36             | 6.08                         | -0.13      | 2.35             | -3.09           | 0.315  | 8.894     | 0.339                             | 8.228      | 8.636      | 8.846      | 9.159   | 9.778  |         |
| KCTD10   | xQSY9KFQu4EEdJWV3o  | rs12821585 | 10.42            | 9.94                         | -0.202     | 3.34             | -0.1            | 0.08   | 8.894     | 0.339                             | 8.228      | 8.636      | 8.846      | 9.159   | 9.778  |         |
| KCTD10   | xQSY9KFQu4EEdJWV3o  | rs1477117  | 33.76            | 32.15                        | -0.545     | 7.5              | 2.32            | 0.185  | 8.894     | 0.339                             | 8.228      | 8.636      | 8.846      | 9.159   | 9.778  |         |
| KCTD10   | xQSY9KFQu4EEdJWV3o  | rs9943689  | 35.73            | 34.02                        | -0.571     | 6.78             | 3.88            | 0.2    | 8.894     | 0.339                             | 8.228      | 8.636      | 8.846      | 9.159   | 9.778  |         |
| KCTD10   | xQSY9KFQu4EEdJWV3o  | rs4766602  | 18.43            | 17.56                        | -0.339     | 4.48             | 4.05            | 0.4025 | 8.894     | 0.339                             | 8.228      | 8.636      | 8.846      | 9.159   | 9.778  |         |
| KCTD10   | xQSY9KFQu4EEdJWV3o  | rs2058804  | 13.4             | 12.78                        | 0.278      | 3.87             | -6.14           | 0.4375 | 8.894     | 0.339                             | 8.228      | 8.636      | 8.846      | 9.159   | 9.778  |         |
| KCTD10   | xQSY9KFQu4EEdJWV3o  | rs7298565  | 13.4             | 12.78                        | -0.278     | 3.87             | 22.38           | 0.4375 | 8.894     | 0.339                             | 8.228      | 8.636      | 8.846      | 9.159   | 9.778  |         |
| KCTD10   | xQSY9KFQu4EEdJWV3o  | rs3815575  | 14.07            | 13.41                        | 0.284      | 3.73             | 32.75           | 0.29   | 8.894     | 0.339                             | 8.228      | 8.636      | 8.846      | 9.159   | 9.778  |         |
| KCTD20   | oISgryO7_QML5UCrVU  | rs4711453  | 4.1              | 3.93                         | -0.081     | 1.55             | -18.93          | 0.3    | 9.63      | 0.379                             | 8.279      | 9.385      | 9.573      | 9.813   | 10.876 |         |
| KDEL2    | ISSXw3Ew99N2UPSWSU  | rs3741060  | 4.09             | 3.92                         | -0.078     | 1.39             | 10.87           | 0.13   | 8.677     | 0.289                             | 7.697      | 8.525      | 8.728      | 8.892   | 9.452  |         |
| KDEL2    | ISSXw3Ew99N2UPSWSU  | rs10749920 | 3.33             | 3.19                         | -0.061     | 1.44             | 14.56           | 0.1725 | 8.677     | 0.289                             | 7.697      | 8.525      | 8.728      | 8.892   | 9.452  |         |
| KDEL2    | Qk3tfSmaEg98USQKQ   | rs2881698  | 8.34             | 7.97                         | -0.168     | 2.51             | 20.99           | 0.195  | 9.519     | 0.315                             | 8.585      | 9.325      | 9.533      | 9.727   | 10.356 |         |
| KHK      | TO4VKMSL.vntdKitY3o | rs2011616  | 3.85             | 3.69                         | -0.075     | 0.98             | -7.56           | 0.407  | 7.268     | 0.088                             | 7.109      | 7.207      | 7.255      | 7.323   | 7.599  |         |
| KHK      | TO4VKMSL.vntdKitY3o | rs2304681  | 3.92             | 3.75                         | -0.077     | 0.84             | 5.13            | 0.3995 | 7.268     | 0.088                             | 7.109      | 7.207      | 7.255      | 7.323   | 7.599  |         |
| KHK      | QFxnES39IUSnW1U2UY  | rs2304681  | 3.77             | 3.61                         | -0.074     | 0.85             | 5.13            | 0.3995 | 7.32      | 0.133                             | 7.103      | 7.225      | 7.29       | 7.395   | 7.769  |         |
| KHK      | TO4VKMSL.vntdKitY3o | rs4665947  | 3.98             | 3.81                         | -0.076     | 1.14             | 24.42           | 0.355  | 7.268     | 0.088                             | 7.109      | 7.207      | 7.255      | 7.323   | 7.599  |         |
| KHK      | TO4VKMSL.vntdKitY3o | rs1866561  | 4.21             | 4.03                         | 0.081      | 1.18             | 27.67           | 0.3575 | 7.268     | 0.088                             | 7.109      | 7.207      | 7.255      | 7.323   | 7.599  |         |
| KIAA0040 | cnt0V_fkASO_ljFIdU  | rs2072041  | 5.32             | 5.09                         | 0.099      | 1.73             | -33.28          | 0.3375 | 7.97      | 0.232                             | 7.535      | 7.818      | 7.939      | 8.076   | 9.243  |         |
| KIAA0040 | cnt0V_fkASO_ljFIdU  | rs2010221  | 6.09             | 5.82                         | 0.115      | 3.07             | -32.26          | 0.145  | 7.97      | 0.232                             | 7.535      | 7.818      | 7.939      | 8.076   | 9.243  |         |
| KIAA0040 | cnt0V_fkASO_ljFIdU  | rs4651322  | 5.76             | 5.51                         | 0.109      | 1.77             | -21.4           | 0.3325 | 7.97      | 0.232                             | 7.535      | 7.818      | 7.939      | 8.076   | 9.243  |         |
| KIAA0040 | cnt0V_fkASO_ljFIdU  | rs1018829  | 7.29             | 6.96                         | -0.139     | 3.1              | -16.4           | 0.206  | 7.97      | 0.232                             | 7.535      | 7.818      | 7.939      | 8.076   | 9.243  |         |
| KIAA0040 | cnt0V_fkASO_ljFIdU  | rs10489328 | 11.16            | 10.65                        | 0.211      | 3.82             | -13.01          | 0.18   | 7.97      | 0.232                             | 7.535      | 7.818      | 7.939      | 8.076   | 9.243  |         |
| KIAA0040 | cnt0V_fkASO_ljFIdU  | rs6701037  | 7.37             | 7.04                         | -0.141     | 4.15             | -6.04           | 0.4375 | 7.97      | 0.232                             | 7.535      | 7.818      | 7.939      | 8.076   | 9.243  |         |
| KIAA0040 | cnt0V_fkASO_ljFIdU  | rs1057285  | 7.74             | 7.39                         | -0.145     | 3.05             | 0.72            | 0.15   | 7.97      | 0.232                             | 7.535      | 7.818      | 7.939      | 8.076   | 9.243  |         |
| KIAA0040 | cnt0V_fkASO_ljFIdU  | rs2269655  | 4.43             | 4.23                         | -0.08      | 3.2              | 9.48            | 0.1658 | 7.97      | 0.232                             | 7.535      | 7.818      | 7.939      | 8.076   | 9.243  |         |
| KIAA0090 | lqyq6gHpMe7syR5Y_k  | rs17393888 | 3.46             | 3.23                         | 0.065      | 2.05             | -1.65           | 0.0975 | 8.223     | 0.192                             | 7.768      | 8.085      | 8.212      | 8.349   | 8.75   |         |
| KIAA0367 | Qd3CE93iu7igtHHXJc  | rs520365   | 3.96             | 3.79                         | 0.08       | 1.04             | -24.59          | 0.365  | 7.168     | 0.085                             | 7.099      | 7.123      | 7.137      | 7.171   | 7.787  | Yes     |
| KIAA0367 | Qd3CE93iu7igtHHXJc  | rs505034   | 3.57             | 3.42                         | 0.071      | 1.48             | -18.21          | 0.2275 | 7.168     | 0.085                             | 7.099      | 7.123      | 7.137      | 7.171   | 7.787  | Yes     |
| KIAA0367 | Qd3CE93iu7igtHHXJc  | rs506965   | 4.11             | 3.93                         | 0.083      | 1.14             | -17.98          | 0.38   | 7.168     | 0.085                             | 7.099      | 7.123      | 7.137      | 7.171   | 7.787  | Yes     |
| KIAA0367 | Qd3CE93iu7igtHHXJc  | rs620321   | 3.86             | 3.70                         | -0.079     | 1.7              | -13.24          | 0.22   | 7.168     | 0.085                             | 7.099      | 7.123      | 7.137      | 7.171   | 7.787  | Yes     |
| KIAA0367 | Qd3CE93iu7igtHHXJc  | rs561970   | 3.67             | 3.52                         | 0.073      | 1.57             | -9.96           | 0.197  | 7.168     | 0.085                             | 7.099      | 7.123      | 7.137      | 7.171   | 7.787  | Yes     |
| KIAA0367 | Qd3CE93iu7igtHHXJc  | rs620985   | 3.68             | 3.52                         | -0.076     | 1.2              | -9.72           | 0.3575 | 7.168     | 0.085                             | 7.099      | 7.123      | 7.137      | 7.171   | 7.787  | Yes     |
| KIAA0367 | Qd3CE93iu7igtHHXJc  | rs620552   | 3.66             | 3.51                         | -0.072     | 1.43             | -9.64           | 0.2025 | 7.168     | 0.085                             | 7.099      | 7.123      | 7.137      | 7.171   | 7.787  | Yes     |
| KIAA0513 | BffgXrpVb6BzS6bdU4  | rs1875246  | 3.42             | 3.27                         | -0.065     | 0.56             | -1.84           | 0.3975 | 8.76      | 0.509                             | 7.881      | 8.402      | 8.652      | 9.009   | 10.504 |         |
| KIAA0513 | BffgXrpVb6BzS6bdU4  | rs13335460 | 4.34             | 4.16                         | -0.083     | 1.01             | 11.25           | 0.3425 | 8.76      | 0.509                             | 7.881      | 8.402      | 8.652      | 9.009   | 10.504 |         |

| Symbol   | Lumi nuID          | SNP        | Population-based             | Population-based                      | % Variance Explained | Family-based                 | Distance from transcript (kb) | MAF    | Mean  | Transcript abundance (log2 scale) |         |                 |        |                 | SNP mapping under probe |
|----------|--------------------|------------|------------------------------|---------------------------------------|----------------------|------------------------------|-------------------------------|--------|-------|-----------------------------------|---------|-----------------|--------|-----------------|-------------------------|
|          |                    |            | association p-value (-log10) | association p-value (-log10), GC adj. |                      | association p-value (-log10) |                               |        |       | Standard Deviation                | Minimum | 25th percentile | Median | 75th percentile |                         |
| KIAA0513 | BffgXrpVb6BzS6bdU4 | rs11642445 | 4.08                         | 3.91                                  | -0.077               | 0.73                         | 27.79                         | 0.4075 | 8.76  | 0.509                             | 7.881   | 8.402           | 8.652  | 9.009           | 10.504                  |
| KIAA0513 | BffgXrpVb6BzS6bdU4 | rs4782687  | 3.7                          | 3.54                                  | 0.068                | 0.54                         | -28.75                        | 0.405  | 8.76  | 0.509                             | 7.881   | 8.402           | 8.652  | 9.009           | 10.504                  |
| KIAA0831 | HuhqHTsKHQ.qgITouk | rs9323283  | 4.24                         | 4.05                                  | -0.08                | 2.49                         | 7.67                          | 0.1425 | 9.581 | 0.304                             | 8.597   | 9.385           | 9.556  | 9.777           | 10.691                  |
| KIAA0892 | udXqMJHVJVvzSARKQo | rs2301785  | 3.29                         | 3.15                                  | 0.06                 | 0.93                         | -47.62                        | 0.05   | 9.377 | 0.269                             | 8.693   | 9.179           | 9.412  | 9.585           | 10.199                  |
| KIAA0892 | udXqMJHVJVvzSARKQo | rs8108647  | 10.41                        | 9.93                                  | -0.203               | 3.44                         | -28.16                        | 0.1775 | 9.377 | 0.269                             | 8.693   | 9.179           | 9.412  | 9.585           | 10.199                  |
| KIAA0892 | udXqMJHVJVvzSARKQo | rs968525   | 10.5                         | 10.02                                 | -0.205               | 3.51                         | 3.43                          | 0.175  | 9.377 | 0.269                             | 8.693   | 9.179           | 9.412  | 9.585           | 10.199                  |
| KIAA0892 | udXqMJHVJVvzSARKQo | rs10415849 | 5                            | 4.79                                  | -0.101               | 1.51                         | 35.52                         | 0.1225 | 9.377 | 0.269                             | 8.693   | 9.179           | 9.412  | 9.585           | 10.199                  |
| KIAA1505 | leSJJIYOXE1SCSOUd8 | rs17544690 | 12.3                         | 11.73                                 | -0.226               | 3.59                         | 59.06                         | 0.1675 | 8.161 | 0.288                             | 7.402   | 7.94            | 8.19   | 8.373           | 8.957                   |
| KIAA1505 | leSJJIYOXE1SCSOUd8 | rs10252204 | 3.65                         | 3.50                                  | 0.064                | 1.38                         | 68.87                         | 0.385  | 8.161 | 0.288                             | 7.402   | 7.94            | 8.19   | 8.373           | 8.957                   |
| KIAA1505 | leSJJIYOXE1SCSOUd8 | rs2075761  | 6.7                          | 6.40                                  | -0.13                | 1.95                         | 77.02                         | 0.0928 | 8.161 | 0.288                             | 7.402   | 7.94            | 8.19   | 8.373           | 8.957                   |
| KIAA1505 | leSJJIYOXE1SCSOUd8 | rs3093273  | 6.36                         | 6.08                                  | -0.12                | 2.31                         | 77.34                         | 0.085  | 8.161 | 0.288                             | 7.402   | 7.94            | 8.19   | 8.373           | 8.957                   |
| KIAA1505 | leSJJIYOXE1SCSOUd8 | rs10488499 | 11.17                        | 10.66                                 | -0.206               | 2.9                          | 82.13                         | 0.155  | 8.161 | 0.288                             | 7.402   | 7.94            | 8.19   | 8.373           | 8.957                   |
| KIAA1505 | leSJJIYOXE1SCSOUd8 | rs3108440  | 3.47                         | 3.32                                  | 0.062                | 2.08                         | -27.82                        | 0.1025 | 8.161 | 0.288                             | 7.402   | 7.94            | 8.19   | 8.373           | 8.957                   |
| KIAA1505 | leSJJIYOXE1SCSOUd8 | rs3108445  | 4.04                         | 3.87                                  | 0.072                | 3.41                         | -18.43                        | 0.1575 | 8.161 | 0.288                             | 7.402   | 7.94            | 8.19   | 8.373           | 8.957                   |
| KIAA1505 | leSJJIYOXE1SCSOUd8 | rs3763402  | 3.61                         | 3.45                                  | -0.064               | 1.52                         | -7.7                          | 0.2    | 8.161 | 0.288                             | 7.402   | 7.94            | 8.19   | 8.373           | 8.957                   |
| KIAA1505 | leSJJIYOXE1SCSOUd8 | rs6465532  | 4.28                         | 4.09                                  | 0.079                | 1.08                         | -7.09                         | 0.4725 | 8.161 | 0.288                             | 7.402   | 7.94            | 8.19   | 8.373           | 8.957                   |
| KIAA1505 | leSJJIYOXE1SCSOUd8 | rs8124     | 5.42                         | 5.19                                  | 0.106                | 2.4                          | -0.1                          | 0.4221 | 8.161 | 0.288                             | 7.402   | 7.94            | 8.19   | 8.373           | 8.957                   |
| KIAA1505 | leSJJIYOXE1SCSOUd8 | rs6973950  | 3.41                         | 3.26                                  | -0.063               | 1.66                         | 17.31                         | 0.4975 | 8.161 | 0.288                             | 7.402   | 7.94            | 8.19   | 8.373           | 8.957                   |
| KIAA1505 | leSJJIYOXE1SCSOUd8 | rs2272316  | 4.42                         | 4.23                                  | -0.087               | 3.23                         | 18.44                         | 0.3575 | 8.161 | 0.288                             | 7.402   | 7.94            | 8.19   | 8.373           | 8.957                   |
| KIAA1505 | leSJJIYOXE1SCSOUd8 | rs11764672 | 3.44                         | 3.29                                  | 0.064                | 1.9                          | 24.67                         | 0.42   | 8.161 | 0.288                             | 7.402   | 7.94            | 8.19   | 8.373           | 8.957                   |
| KIAA1598 | E_Ru6wkyn4IrqkrE4  | rs2170862  | 3.42                         | 3.27                                  | -0.063               | 2.18                         | -23.29                        | 0.2461 | 8.449 | 0.768                             | 7.298   | 7.811           | 8.338  | 8.953           | 10.969                  |
| KIAA1598 | E_Ru6wkyn4IrqkrE4  | rs2257791  | 3.72                         | 3.56                                  | 0.068                | 1.3                          | -0.64                         | 0.2475 | 8.449 | 0.768                             | 7.298   | 7.811           | 8.338  | 8.953           | 10.969                  |
| KIAA1598 | E_Ru6wkyn4IrqkrE4  | rs740600   | 3.81                         | 3.65                                  | 0.071                | 1.2                          | 7.57                          | 0.2525 | 8.449 | 0.768                             | 7.298   | 7.811           | 8.338  | 8.953           | 10.969                  |
| KIAA1598 | E_Ru6wkyn4IrqkrE4  | rs1905541  | 3.67                         | 3.52                                  | 0.067                | 1.17                         | -29.24                        | 0.2525 | 8.449 | 0.768                             | 7.298   | 7.811           | 8.338  | 8.953           | 10.969                  |
| KIAA1598 | E_Ru6wkyn4IrqkrE4  | rs10787735 | 3.73                         | 3.58                                  | 0.068                | 1.12                         | -14.63                        | 0.26   | 8.449 | 0.768                             | 7.298   | 7.811           | 8.338  | 8.953           | 10.969                  |
| KIAA1609 | Zjkn3up9365GveXeg  | rs2061788  | 5.44                         | 5.20                                  | -0.11                | 1.11                         | -39.55                        | 0.1175 | 7.18  | 0.085                             | 7.099   | 7.129           | 7.156  | 7.197           | 7.721                   |
| KIAA1609 | Zjkn3up9365GveXeg  | rs2288581  | 5.33                         | 5.10                                  | 0.109                | 0.69                         | -34.88                        | 0.11   | 7.18  | 0.085                             | 7.099   | 7.129           | 7.156  | 7.197           | 7.721                   |
| KIAA1609 | Zjkn3up9365GveXeg  | rs2288578  | 6.71                         | 6.41                                  | -0.139               | 0.91                         | -34.77                        | 0.0725 | 7.18  | 0.085                             | 7.099   | 7.129           | 7.156  | 7.197           | 7.721                   |
| KIAA1609 | Zjkn3up9365GveXeg  | rs12445933 | 5.46                         | 5.22                                  | 0.113                | 0.64                         | -34.26                        | 0.0704 | 7.18  | 0.085                             | 7.099   | 7.129           | 7.156  | 7.197           | 7.721                   |
| KIAA1609 | Zjkn3up9365GveXeg  | rs2278299  | 8.34                         | 7.96                                  | -0.168               | 3.78                         | -28.55                        | 0.1125 | 7.18  | 0.085                             | 7.099   | 7.129           | 7.156  | 7.197           | 7.721                   |
| KIAA1609 | Zjkn3up9365GveXeg  | rs3826149  | 5.33                         | 5.09                                  | -0.106               | 3.04                         | -26.11                        | 0.1175 | 7.18  | 0.085                             | 7.099   | 7.129           | 7.156  | 7.197           | 7.721                   |
| KIAA1609 | Zjkn3up9365GveXeg  | rs2241633  | 5.92                         | 5.66                                  | -0.121               | 4.44                         | -13.53                        | 0.1179 | 7.18  | 0.085                             | 7.099   | 7.129           | 7.156  | 7.197           | 7.721                   |
| KIAA1609 | Zjkn3up9365GveXeg  | rs2241632  | 10.38                        | 9.90                                  | 0.214                | 2.77                         | -13.42                        | 0.0631 | 7.18  | 0.085                             | 7.099   | 7.129           | 7.156  | 7.197           | 7.721                   |
| KIAA1609 | Zjkn3up9365GveXeg  | rs1044874  | 3.58                         | 3.43                                  | -0.072               | 1.59                         | 1.47                          | 0.1809 | 7.18  | 0.085                             | 7.099   | 7.129           | 7.156  | 7.197           | 7.721                   |
| KIAA1683 | E1JI4pJA6SYly9CU   | rs2277922  | 3.42                         | 3.28                                  | 0.058                | 0.86                         | 8.61                          | 0.41   | 7.224 | 0.136                             | 7.098   | 7.147           | 7.186  | 7.261           | 8.512                   |
| KIAA1683 | E1JI4pJA6SYly9CU   | rs1469023  | 3.66                         | 3.51                                  | -0.063               | 0.96                         | -7.02                         | 0.4095 | 7.224 | 0.136                             | 7.098   | 7.147           | 7.186  | 7.261           | 8.512                   |
| KIAA1683 | E1JI4pJA6SYly9CU   | rs12608504 | 4.45                         | 4.26                                  | -0.078               | 1.36                         | 3.9                           | 0.3819 | 7.224 | 0.136                             | 7.098   | 7.147           | 7.186  | 7.261           | 8.512                   |
| KIAA1737 | Eak4Ugl3U2vlQp7Cy4 | rs2655991  | 4                            | 3.83                                  | 0.078                | 1.67                         | -9.19                         | 0.3    | 8.788 | 0.238                             | 7.973   | 8.637           | 8.804  | 8.946           | 9.543                   |
| KIAA1737 | Eak4Ugl3U2vlQp7Cy4 | rs2655995  | 4.02                         | 3.84                                  | 0.078                | 1.81                         | -5.26                         | 0.2925 | 8.788 | 0.238                             | 7.973   | 8.637           | 8.804  | 8.946           | 9.543                   |
| KIAA1737 | Eak4Ugl3U2vlQp7Cy4 | rs3813543  | 4.76                         | 4.56                                  | -0.094               | 1.02                         | -2.15                         | 0.4171 | 8.788 | 0.238                             | 7.973   | 8.637           | 8.804  | 8.946           | 9.543                   |
| KIAA1737 | Eak4Ugl3U2vlQp7Cy4 | rs888066   | 4.59                         | 4.40                                  | 0.09                 | 0.85                         | 6.55                          | 0.42   | 8.788 | 0.238                             | 7.973   | 8.637           | 8.804  | 8.946           | 9.543                   |
| KIAA1737 | Eak4Ugl3U2vlQp7Cy4 | rs2110910  | 4.29                         | 4.11                                  | -0.083               | 1.76                         | 12.9                          | 0.3225 | 8.788 | 0.238                             | 7.973   | 8.637           | 8.804  | 8.946           | 9.543                   |
| KIAA1737 | Eak4Ugl3U2vlQp7Cy4 | rs2041822  | 5.86                         | 5.60                                  | -0.118               | 2.26                         | 14.74                         | 0.2325 | 8.788 | 0.238                             | 7.973   | 8.637           | 8.804  | 8.946           | 9.543                   |
| KIAA1804 | TS1_U.h4hROu5V_Lik | rs1294293  | 4.27                         | 4.08                                  | -0.08                | 1.12                         | 6.8                           | 0.2211 | 7.137 | 0.022                             | 7.103   | 7.123           | 7.131  | 7.145           | 7.234                   |
| KIAA1804 | TS1_U.h4hROu5V_Lik | rs1294264  | 4.18                         | 4.00                                  | -0.078               | 1.59                         | 18.14                         | 0.2175 | 7.137 | 0.022                             | 7.103   | 7.123           | 7.131  | 7.145           | 7.234                   |
| KIAA1875 | N6pe0_s.pQpeTagwLU | rs13264654 | 23.8                         | 22.67                                 | -0.435               | 3.37                         | 4.24                          | 0.1193 | 8.174 | 0.459                             | 7.403   | 7.863           | 8.084  | 8.459           | 9.453                   |
| KIAA1967 | xpTRqDotTnICJ0u_p4 | rs11778693 | 3.32                         | 3.18                                  | 0.06                 | 0.78                         | 0.3                           | 0.335  | 9.837 | 0.419                             | 8.736   | 9.561           | 9.804  | 10.08           | 11.39                   |
| KIAA1967 | xpTRqDotTnICJ0u_p4 | rs11136092 | 3.65                         | 3.49                                  | 0.067                | 0.79                         | 3.94                          | 0.33   | 9.837 | 0.419                             | 8.736   | 9.561           | 9.804  | 10.08           | 11.39                   |
| KIAA1967 | xpTRqDotTnICJ0u_p4 | rs4242434  | 3.55                         | 3.40                                  | 0.065                | 0.78                         | 23.85                         | 0.3325 | 9.837 | 0.419                             | 8.736   | 9.561           | 9.804  | 10.08           | 11.39                   |
| KIAA1967 | xpTRqDotTnICJ0u_p4 | rs13264187 | 3.64                         | 3.49                                  | -0.067               | 0.78                         | 28.11                         | 0.3367 | 9.837 | 0.419                             | 8.736   | 9.561           | 9.804  | 10.08           | 11.39                   |
| KIF16B   | 621XuklyO6_pTbq9Xg | rs12625552 | 4.25                         | 4.06                                  | -0.082               | 0.14                         | -145.81                       | 0.075  | 7.618 | 0.182                             | 7.119   | 7.506           | 7.621  | 7.729           | 8.116                   |
| KIF16B   | 621XuklyO6_pTbq9Xg | rs997972   | 8.5                          | 8.12                                  | -0.174               | 1.9                          | 7.12                          | 0.1325 | 7.618 | 0.182                             | 7.119   | 7.506           | 7.621  | 7.729           | 8.116                   |
| KIF20B   | uUIHrBT33HezlTitD4 | rs12218194 | 4.22                         | 4.04                                  | 0.08                 | 0.89                         | -41.37                        | 0.2475 | 8.879 | 0.218                             | 8.209   | 8.736           | 8.862  | 9.034           | 9.379                   |
| KIF20B   | uUIHrBT33HezlTitD4 | rs1048057  | 4.02                         | 3.85                                  | 0.076                | 0.83                         | 9.47                          | 0.236  | 8.879 | 0.218                             | 8.209   | 8.736           | 8.862  | 9.034           | 9.379                   |
| KIF20B   | uUIHrBT33HezlTitD4 | rs10509579 | 3.94                         | 3.77                                  | -0.074               | 1.05                         | 34.41                         | 0.235  | 8.879 | 0.218                             | 8.209   | 8.736           | 8.862  | 9.034           | 9.379                   |
| KIF20B   | uUIHrBT33HezlTitD4 | rs1886997  | 3.66                         | 3.69                                  | 0.072                | 1.05                         | -36.45                        | 0.2337 | 8.879 | 0.218                             | 8.209   | 8.736           | 8.862  | 9.034           | 9.379                   |
| KIF20B   | uUIHrBT33HezlTitD4 | rs12763178 | 4.85                         | 4.64                                  | -0.093               | 1.44                         | 31.29                         | 0.22   | 8.879 | 0.218                             | 8.209   | 8.736           | 8.862  | 9.034           | 9.379                   |
| KIR3DL2  | fs7J3dd9AwE7eV06.Y | rs11665986 | 8.36                         | 7.98                                  | 0.165                | 2.16                         | 5.27                          | 0.1734 | 7.546 | 0.343                             | 7.099   | 7.27            | 7.468  | 7.787           | 8.751                   |
| KIR3DL2  | fs7J3dd9AwE7eV06.Y | rs269919   | 4.46                         | 4.27                                  | -0.084               | 1.48                         | 48.68                         | 0.3925 | 7.546 | 0.343                             | 7.099   | 7.27            | 7.468  | 7.787           | 8.751                   |
| KISS1R   | odXaiaoeegSac997zw | rs13090    | 19.77                        | 18.84                                 | 0.37                 | 4.23                         | -49.24                        | 0.28   | 7.762 | 0.314                             | 7.247   | 7.529           | 7.696  | 7.96            | 8.969                   |
| KISS1R   | odXaiaoeegSac997zw | rs1683591  | 19.55                        | 18.63                                 | 0.366                | 2.73                         | -48.32                        | 0.2825 | 7.762 | 0.314                             | 7.247   | 7.529           | 7.696  | 7.96            | 8.969                   |
| KISS1R   | odXaiaoeegSac997zw | rs2241623  | 3.91                         | 3.74                                  | -0.077               | 0.44                         | -40.75                        | 0.33   | 7.762 | 0.314                             | 7.247   | 7.529           | 7.696  | 7.96            | 8.969                   |

| Symbol | Lumi nuID           | SNP        | Population-based association |         | % Variance Explained | Family-based association |                               | Transcript abundance (log2 scale) |        |                    |         |                 |        |                 | SNP mapping under probe |
|--------|---------------------|------------|------------------------------|---------|----------------------|--------------------------|-------------------------------|-----------------------------------|--------|--------------------|---------|-----------------|--------|-----------------|-------------------------|
|        |                     |            | p-value (-log10)             | GC adj. |                      | p-value (-log10)         | Distance from transcript (kb) | MAF                               | Mean   | Standard Deviation | Minimum | 25th percentile | Median | 75th percentile |                         |
| KISS1R | odXaiaoeeegSac997zw | rs2965292  | 21.31                        | 20.31   | 0.394                | 4.43                     | -26.51                        | 0.2487                            | 7.762  | 0.314              | 7.247   | 7.529           | 7.696  | 7.96            | 8.969                   |
| KLF12  | fkK3XIVSU7T3J7gekY  | rs1324058  | 3.71                         | 3.55    | 0.071                | 1.65                     | -30.13                        | 0.22                              | 8.101  | 0.789              | 7.184   | 7.577           | 7.833  | 8.321           | 10.943                  |
| KLF12  | fkK3XIVSU7T3J7gekY  | rs2325566  | 3.32                         | 3.18    | -0.061               | 1.47                     | -2.76                         | 0.324                             | 8.101  | 0.789              | 7.184   | 7.577           | 7.833  | 8.321           | 10.943                  |
| KLF15  | ZbVdda.VIQNSEUI.Ks  | rs2280677  | 4.21                         | 4.03    | 0.086                | 1.44                     | 36.89                         | 0.2325                            | 7.222  | 0.073              | 7.111   | 7.161           | 7.212  | 7.276           | 7.514                   |
| KLHDC4 | QSruB.dU6.Ld4ZpHqU  | rs7193593  | 8.31                         | 7.93    | 0.165                | 1.11                     | -6.38                         | 0.2225                            | 8.979  | 0.271              | 8.284   | 8.812           | 8.969  | 9.148           | 9.86                    |
| KLHDC4 | QSruB.dU6.Ld4ZpHqU  | rs2290018  | 4.93                         | 4.71    | -0.095               | 1.36                     | 0.67                          | 0.3869                            | 8.979  | 0.271              | 8.284   | 8.812           | 8.969  | 9.148           | 9.86                    |
| KLHDC4 | QSruB.dU6.Ld4ZpHqU  | rs7195501  | 3.81                         | 3.65    | 0.072                | 2.82                     | -20.16                        | 0.26                              | 8.979  | 0.271              | 8.284   | 8.812           | 8.969  | 9.148           | 9.86                    |
| KLHDC4 | QSruB.dU6.Ld4ZpHqU  | rs9940714  | 10.64                        | 10.15   | -0.21                | 2.9                      | -15.95                        | 0.3125                            | 8.979  | 0.271              | 8.284   | 8.812           | 8.969  | 9.148           | 9.86                    |
| KLHDC4 | QSruB.dU6.Ld4ZpHqU  | rs4354949  | 6.12                         | 5.85    | -0.119               | 3.35                     | -15.16                        | 0.2075                            | 8.979  | 0.271              | 8.284   | 8.812           | 8.969  | 9.148           | 9.86                    |
| KLHDC4 | QSruB.dU6.Ld4ZpHqU  | rs12918318 | 3.65                         | 3.50    | 0.068                | 2.51                     | -13.3                         | 0.255                             | 8.979  | 0.271              | 8.284   | 8.812           | 8.969  | 9.148           | 9.86                    |
| KLHDC4 | QSruB.dU6.Ld4ZpHqU  | rs4417557  | 9.51                         | 9.07    | 0.187                | 3.37                     | -7.15                         | 0.1935                            | 8.979  | 0.271              | 8.284   | 8.812           | 8.969  | 9.148           | 9.86                    |
| KLHDC4 | QSruB.dU6.Ld4ZpHqU  | rs8063363  | 5.48                         | 5.24    | -0.107               | 4.31                     | 7.44                          | 0.2225                            | 8.979  | 0.271              | 8.284   | 8.812           | 8.969  | 9.148           | 9.86                    |
| KLHDC4 | QSruB.dU6.Ld4ZpHqU  | rs8047611  | 3.32                         | 3.18    | 0.062                | 1.98                     | 17.05                         | 0.203                             | 8.979  | 0.271              | 8.284   | 8.812           | 8.969  | 9.148           | 9.86                    |
| KLHDC5 | IgiQKueA4fsa_nm90   | rs2042587  | 4.4                          | 4.21    | 0.083                | 3.31                     | 7.34                          | 0.43                              | 9.43   | 0.324              | 7.125   | 9.26            | 9.423  | 9.594           | 10.329                  |
| KLHDC5 | IgiQKueA4fsa_nm90   | rs3751235  | 4.56                         | 4.36    | -0.084               | 3.75                     | -6.69                         | 0.2085                            | 9.43   | 0.324              | 7.125   | 9.26            | 9.423  | 9.594           | 10.329                  |
| KLHDC5 | IgiQKueA4fsa_nm90   | rs12578595 | 4.56                         | 4.36    | -0.084               | 3.58                     | 9.02                          | 0.1975                            | 9.43   | 0.324              | 7.125   | 9.26            | 9.423  | 9.594           | 10.329                  |
| KLHDC5 | IgiQKueA4fsa_nm90   | rs10842995 | 4.02                         | 3.84    | -0.073               | 2.39                     | 9.59                          | 0.245                             | 9.43   | 0.324              | 7.125   | 9.26            | 9.423  | 9.594           | 10.329                  |
| KLHL1  | ER4IAjkuw8_p.5fO_I  | rs10507781 | 3.6                          | 3.45    | 0.07                 | 0.44                     | 45.95                         | 0.0875                            | 7.113  | 0.011              | 7.096   | 7.106           | 7.111  | 7.117           | 7.161                   |
| KLHL10 | xUqelDvzigknlhB9U   | rs9905601  | 4.69                         | 4.48    | -0.096               | 3.98                     | 10.61                         | 0.1583                            | 7.113  | 0.009              | 7.094   | 7.107           | 7.112  | 7.118           | 7.169                   |
| KLHL23 | uuoDLqw31S5Tmt06u4  | rs7583128  | 6.55                         | 6.26    | 0.129                | 1                        | 14.72                         | 0.36                              | 7.261  | 0.11               | 7.107   | 7.184           | 7.239  | 7.312           | 7.729                   |
| KLHL36 | xFNdFf1Sp3shSSQfc   | rs2303230  | 4.07                         | 3.90    | -0.079               | 2.32                     | -2.24                         | 0.325                             | 10.148 | 0.343              | 9.291   | 9.931           | 10.124 | 10.35           | 11.481                  |
| KLHL8  | ESKS8FeyR8ch64Qeno  | rs2926511  | 3.76                         | 3.60    | -0.067               | 1.1                      | -19.6                         | 0.4575                            | 8.439  | 0.246              | 7.221   | 8.312           | 8.431  | 8.582           | 9.283                   |
| KLHL9  | 0oFCkA4Pp9yq3gXx5U  | rs1475547  | 5.4                          | 5.16    | -0.107               | 1.92                     | -45.63                        | 0.255                             | 9.834  | 0.439              | 8.095   | 9.587           | 9.893  | 10.148          | 10.89                   |
| KLHL9  | 0oFCkA4Pp9yq3gXx5U  | rs10964958 | 5.4                          | 5.16    | -0.107               | 1.92                     | -44.94                        | 0.255                             | 9.834  | 0.439              | 8.095   | 9.587           | 9.893  | 10.148          | 10.89                   |
| KLHL9  | 0oFCkA4Pp9yq3gXx5U  | rs1330311  | 5.4                          | 5.16    | 0.107                | 1.92                     | -41.95                        | 0.255                             | 9.834  | 0.439              | 8.095   | 9.587           | 9.893  | 10.148          | 10.89                   |
| KLHL9  | 0oFCkA4Pp9yq3gXx5U  | rs4978092  | 5.4                          | 5.16    | -0.107               | 1.92                     | -41.1                         | 0.255                             | 9.834  | 0.439              | 8.095   | 9.587           | 9.893  | 10.148          | 10.89                   |
| KLHL9  | 0oFCkA4Pp9yq3gXx5U  | rs1360286  | 5.27                         | 5.04    | -0.104               | 2.07                     | -37.39                        | 0.2525                            | 9.834  | 0.439              | 8.095   | 9.587           | 9.893  | 10.148          | 10.89                   |
| KLHL9  | 0oFCkA4Pp9yq3gXx5U  | rs4978097  | 5.4                          | 5.16    | -0.107               | 1.99                     | -36.1                         | 0.255                             | 9.834  | 0.439              | 8.095   | 9.587           | 9.893  | 10.148          | 10.89                   |
| KLHL9  | 0oFCkA4Pp9yq3gXx5U  | rs10119678 | 4.95                         | 4.74    | -0.099               | 1.66                     | 5.42                          | 0.205                             | 9.834  | 0.439              | 8.095   | 9.587           | 9.893  | 10.148          | 10.89                   |
| KLHL9  | 0oFCkA4Pp9yq3gXx5U  | rs614647   | 5.45                         | 5.21    | -0.109               | 1.72                     | 42.24                         | 0.305                             | 9.834  | 0.439              | 8.095   | 9.587           | 9.893  | 10.148          | 10.89                   |
| KLKB1  | 09416qtdN5Ak6luk30  | rs4253239  | 3.66                         | 3.50    | 0.064                | 2.08                     | -0.2                          | 0.1475                            | 7.47   | 0.269              | 7.126   | 7.275           | 7.436  | 7.567           | 9.242                   |
| KLKB1  | 09416qtdN5Ak6luk30  | rs4253292  | 3.61                         | 3.46    | 0.064                | 1.97                     | -10.76                        | 0.145                             | 7.47   | 0.269              | 7.126   | 7.275           | 7.436  | 7.567           | 9.242                   |
| KLRG1  | cs6AcOeUd01W1QU3e0  | rs1805761  | 4.27                         | 4.08    | -0.08                | 3.84                     | -42.69                        | 0.4225                            | 10.184 | 0.491              | 8.896   | 9.827           | 10.169 | 10.54           | 11.301                  |
| KLRG1  | cs6AcOeUd01W1QU3e0  | rs12821842 | 5.15                         | 4.93    | -0.098               | 4.05                     | -33.24                        | 0.42                              | 10.184 | 0.491              | 8.896   | 9.827           | 10.169 | 10.54           | 11.301                  |
| KLRG1  | cs6AcOeUd01W1QU3e0  | rs2377674  | 5.15                         | 4.93    | 0.098                | 4.05                     | -29.46                        | 0.42                              | 10.184 | 0.491              | 8.896   | 9.827           | 10.169 | 10.54           | 11.301                  |
| KLRG1  | cs6AcOeUd01W1QU3e0  | rs1805723  | 5.15                         | 4.93    | -0.098               | 4                        | 0.08                          | 0.42                              | 10.184 | 0.491              | 8.896   | 9.827           | 10.169 | 10.54           | 11.301                  |
| KLRG1  | cs6AcOeUd01W1QU3e0  | rs1805721  | 5.15                         | 4.93    | -0.098               | 4                        | 5.35                          | 0.42                              | 10.184 | 0.491              | 8.896   | 9.827           | 10.169 | 10.54           | 11.301                  |
| KLRG1  | cs6AcOeUd01W1QU3e0  | rs1805671  | 3.35                         | 3.21    | -0.062               | 1.06                     | 0.25                          | 0.28                              | 10.184 | 0.491              | 8.896   | 9.827           | 10.169 | 10.54           | 11.301                  |
| KLRG1  | cs6AcOeUd01W1QU3e0  | rs12322917 | 5.86                         | 5.60    | 0.117                | 2.42                     | 9.89                          | 0.3299                            | 10.184 | 0.491              | 8.896   | 9.827           | 10.169 | 10.54           | 11.301                  |
| KLRG1  | cs6AcOeUd01W1QU3e0  | rs7311509  | 5.91                         | 5.65    | -0.116               | 1.89                     | 15.69                         | 0.33                              | 10.184 | 0.491              | 8.896   | 9.827           | 10.169 | 10.54           | 11.301                  |
| KLRG1  | cs6AcOeUd01W1QU3e0  | rs3026243  | 5.62                         | 5.37    | 0.111                | 1.75                     | 20.06                         | 0.3317                            | 10.184 | 0.491              | 8.896   | 9.827           | 10.169 | 10.54           | 11.301                  |
| KRT1   | KkiIWK2P7VJfFogCJzo | rs638043   | 5.59                         | 5.34    | -0.116               | 2.05                     | -24.18                        | 0.13                              | 7.796  | 0.558              | 7.119   | 7.226           | 7.704  | 8.229           | 9.448                   |
| KRT1   | KkiIWK2P7VJfFogCJzo | rs685382   | 9.05                         | 8.64    | -0.187               | 3.88                     | -18.87                        | 0.18                              | 7.796  | 0.558              | 7.119   | 7.226           | 7.704  | 8.229           | 9.448                   |
| KRT1   | KkiIWK2P7VJfFogCJzo | rs10783526 | 4.52                         | 4.32    | 0.089                | 2.8                      | -13.89                        | 0.25                              | 7.796  | 0.558              | 7.119   | 7.226           | 7.704  | 8.229           | 9.448                   |
| KRT1   | KkiIWK2P7VJfFogCJzo | rs625378   | 6.67                         | 6.37    | 0.138                | 2.43                     | -7.93                         | 0.1275                            | 7.796  | 0.558              | 7.119   | 7.226           | 7.704  | 8.229           | 9.448                   |
| KRT1   | KkiIWK2P7VJfFogCJzo | rs8181747  | 5.17                         | 4.94    | 0.103                | 2.77                     | -4.06                         | 0.2175                            | 7.796  | 0.558              | 7.119   | 7.226           | 7.704  | 8.229           | 9.448                   |
| KRT1   | KkiIWK2P7VJfFogCJzo | rs646526   | 3.92                         | 3.75    | -0.076               | 2.57                     | -3.19                         | 0.24                              | 7.796  | 0.558              | 7.119   | 7.226           | 7.704  | 8.229           | 9.448                   |
| KRT1   | KkiIWK2P7VJfFogCJzo | rs597685   | 15.31                        | 14.59   | 0.3                  | 6.22                     | 2.24                          | 0.3525                            | 7.796  | 0.558              | 7.119   | 7.226           | 7.704  | 8.229           | 9.448                   |
| KRT1   | KkiIWK2P7VJfFogCJzo | rs2741158  | 27.08                        | 25.79   | 0.465                | 9.94                     | -2.62                         | 0.47                              | 7.796  | 0.558              | 7.119   | 7.226           | 7.704  | 8.229           | 9.448                   |
| KRT1   | KkiIWK2P7VJfFogCJzo | rs3759191  | 27.08                        | 25.79   | -0.465               | 9.94                     | 1.48                          | 0.47                              | 7.796  | 0.558              | 7.119   | 7.226           | 7.704  | 8.229           | 9.448                   |
| KRT1   | KkiIWK2P7VJfFogCJzo | rs711345   | 15.4                         | 14.68   | 0.305                | 6.22                     | 3.68                          | 0.35                              | 7.796  | 0.558              | 7.119   | 7.226           | 7.704  | 8.229           | 9.448                   |
| KRT1   | KkiIWK2P7VJfFogCJzo | rs643027   | 15.31                        | 14.59   | -0.3                 | 5.78                     | 10.69                         | 0.3525                            | 7.796  | 0.558              | 7.119   | 7.226           | 7.704  | 8.229           | 9.448                   |
| KRT1   | KkiIWK2P7VJfFogCJzo | rs10783528 | 11.34                        | 10.82   | -0.225               | 5.02                     | 14.3                          | 0.3525                            | 7.796  | 0.558              | 7.119   | 7.226           | 7.704  | 8.229           | 9.448                   |
| KRT1   | KkiIWK2P7VJfFogCJzo | rs1567759  | 34.79                        | 33.13   | -0.555               | 11.63                    | 17.39                         | 0.425                             | 7.796  | 0.558              | 7.119   | 7.226           | 7.704  | 8.229           | 9.448                   |
| KRT1   | KkiIWK2P7VJfFogCJzo | rs1877549  | 5.47                         | 5.23    | 0.108                | 3.13                     | 20.76                         | 0.2175                            | 7.796  | 0.558              | 7.119   | 7.226           | 7.704  | 8.229           | 9.448                   |
| KRT1   | KkiIWK2P7VJfFogCJzo | rs673127   | 9.7                          | 9.26    | -0.196               | 2.51                     | 27.49                         | 0.1725                            | 7.796  | 0.558              | 7.119   | 7.226           | 7.704  | 8.229           | 9.448                   |
| KRT1   | KkiIWK2P7VJfFogCJzo | rs10876324 | 5.87                         | 5.61    | 0.118                | 2.39                     | 28.55                         | 0.48                              | 7.796  | 0.558              | 7.119   | 7.226           | 7.704  | 8.229           | 9.448                   |
| KRT1   | KkiIWK2P7VJfFogCJzo | rs7294743  | 3.44                         | 3.29    | 0.066                | 0.45                     | 31.72                         | 0.3175                            | 7.796  | 0.558              | 7.119   | 7.226           | 7.704  | 8.229           | 9.448                   |
| KRT1   | KkiIWK2P7VJfFogCJzo | rs637074   | 6.05                         | 5.78    | -0.122               | 2.48                     | 34.98                         | 0.485                             | 7.796  | 0.558              | 7.119   | 7.226           | 7.704  | 8.229           | 9.448                   |
| KRT1   | KkiIWK2P7VJfFogCJzo | rs7963098  | 10.15                        | 9.69    | -0.204               | 2.53                     | 46.53                         | 0.1725                            | 7.796  | 0.558              | 7.119   | 7.226           | 7.704  | 8.229           | 9.448                   |
| KRT1   | KkiIWK2P7VJfFogCJzo | rs828113   | 13.04                        | 12.44   | -0.258               | 3.63                     | 47.7                          | 0.25                              | 7.796  | 0.558              | 7.119   | 7.226           | 7.704  | 8.229           | 9.448                   |
| KRT1   | KkiIWK2P7VJfFogCJzo | rs864344   | 13.04                        | 12.44   | 0.258                | 3.63                     | 47.82                         | 0.25                              | 7.796  | 0.558              | 7.119   | 7.226           | 7.704  | 8.229           | 9.448                   |

| Symbol    | Lumi nuID           | SNP        | Population-based             | Population-based                      | % Variance Explained | Family-based                 | Distance from transcript (kb) | MAF    | Transcript abundance (log2 scale) |         |                 |        |                 | SNP mapping under probe |         |
|-----------|---------------------|------------|------------------------------|---------------------------------------|----------------------|------------------------------|-------------------------------|--------|-----------------------------------|---------|-----------------|--------|-----------------|-------------------------|---------|
|           |                     |            | association p-value (-log10) | association p-value (-log10), GC adj. |                      | association p-value (-log10) |                               |        | Standard Deviation                | Minimum | 25th percentile | Median | 75th percentile |                         | Maximum |
| KRT1      | KklIWK2P7VJfFogCJzo | rs662170   | 6.72                         | 6.42                                  | 0.139                | 1.93                         | 49.09                         | 0.4116 | 7.796                             | 0.558   | 7.119           | 7.226  | 7.704           | 8.229                   | 9.448   |
| KRT72     | Ind0ul19_1W.b6fPI4  | rs7295084  | 3.38                         | 3.24                                  | -0.063               | 1.21                         | -5.14                         | 0.0859 | 9.184                             | 0.981   | 7.334           | 8.495  | 9.033           | 9.802                   | 12.063  |
| KRT72     | Ind0ul19_1W.b6fPI4  | rs686339   | 7.11                         | 6.79                                  | 0.145                | 2.43                         | 28.52                         | 0.2625 | 9.184                             | 0.981   | 7.334           | 8.495  | 9.033           | 9.802                   | 12.063  |
| KRT72     | Ind0ul19_1W.b6fPI4  | rs609307   | 7.08                         | 6.76                                  | 0.144                | 2.43                         | 32.11                         | 0.2638 | 9.184                             | 0.981   | 7.334           | 8.495  | 9.033           | 9.802                   | 12.063  |
| KRT73     | ZTe6stffvyl0XV517s  | rs7310156  | 3.44                         | 3.29                                  | -0.063               | 2.12                         | -19.68                        | 0.2075 | 8.493                             | 0.559   | 7.484           | 8.104  | 8.382           | 8.871                   | 10.347  |
| KRT73     | ZTe6stffvyl0XV517s  | rs7296390  | 3.6                          | 3.45                                  | -0.069               | 2.36                         | -4.29                         | 0.4975 | 8.493                             | 0.559   | 7.484           | 8.104  | 8.382           | 8.871                   | 10.347  |
| KRT73     | ZTe6stffvyl0XV517s  | rs686339   | 6.39                         | 6.11                                  | 0.127                | 2.36                         | 11.47                         | 0.2625 | 8.493                             | 0.559   | 7.484           | 8.104  | 8.382           | 8.871                   | 10.347  |
| KRT73     | ZTe6stffvyl0XV517s  | rs609307   | 6.36                         | 6.08                                  | 0.127                | 2.37                         | 15.06                         | 0.2638 | 8.493                             | 0.559   | 7.484           | 8.104  | 8.382           | 8.871                   | 10.347  |
| KRT73     | ZTe6stffvyl0XV517s  | rs11170208 | 3.66                         | 3.51                                  | -0.068               | 3.11                         | 18.49                         | 0.175  | 8.493                             | 0.559   | 7.484           | 8.104  | 8.382           | 8.871                   | 10.347  |
| KRT74     | Woe6s7j_31Et3eqe7U  | rs7295084  | 4.27                         | 4.09                                  | -0.083               | 0.91                         | 22.54                         | 0.0859 | 7.122                             | 0.032   | 7.095           | 7.107  | 7.114           | 7.126                   | 7.437   |
| KRTAP12-4 | 6u5e4nkJe.7u6fX3IQ  | rs2250930  | 3.52                         | 3.37                                  | -0.067               | 1.4                          | 49.48                         | 0.0675 | 7.146                             | 0.027   | 7.107           | 7.129  | 7.141           | 7.158                   | 7.317   |
| KRTAP5-2  | fXulQu4UoK3f19e_3U  | rs7951820  | 4.01                         | 3.84                                  | 0.075                | 0.27                         | -43.34                        | 0.1725 | 7.114                             | 0.012   | 7.096           | 7.106  | 7.111           | 7.118                   | 7.179   |
| KRTAP5-2  | fXulQu4UoK3f19e_3U  | rs7106849  | 5.76                         | 5.50                                  | -0.112               | 0.37                         | -23.14                        | 0.2965 | 7.114                             | 0.012   | 7.096           | 7.106  | 7.111           | 7.118                   | 7.179   |
| KRTAP5-2  | fXulQu4UoK3f19e_3U  | rs10734456 | 5.79                         | 5.53                                  | 0.111                | 0.4                          | -11.06                        | 0.24   | 7.114                             | 0.012   | 7.096           | 7.106  | 7.111           | 7.118                   | 7.179   |
| KRTAP5-2  | fXulQu4UoK3f19e_3U  | rs10837407 | 9.35                         | 8.92                                  | 0.188                | 0.46                         | 5.84                          | 0.2625 | 7.114                             | 0.012   | 7.096           | 7.106  | 7.111           | 7.118                   | 7.179   |
| KRTAP5-2  | fXulQu4UoK3f19e_3U  | rs7117114  | 6.75                         | 6.45                                  | -0.132               | 0.24                         | 7.77                          | 0.2839 | 7.114                             | 0.012   | 7.096           | 7.106  | 7.111           | 7.118                   | 7.179   |
| KRTAP5-2  | fXulQu4UoK3f19e_3U  | rs1989592  | 7.06                         | 6.75                                  | -0.137               | 0.08                         | 9.32                          | 0.165  | 7.114                             | 0.012   | 7.096           | 7.106  | 7.111           | 7.118                   | 7.179   |
| KRTAP5-2  | fXulQu4UoK3f19e_3U  | rs7947734  | 9.43                         | 9.00                                  | -0.188               | 0.69                         | 12.66                         | 0.38   | 7.114                             | 0.012   | 7.096           | 7.106  | 7.111           | 7.118                   | 7.179   |
| KRTAP5-2  | fXulQu4UoK3f19e_3U  | rs7108019  | 3.41                         | 3.27                                  | 0.063                | 0.94                         | 18.52                         | 0.5    | 7.114                             | 0.012   | 7.096           | 7.106  | 7.111           | 7.118                   | 7.179   |
| KRTAP5-2  | fXulQu4UoK3f19e_3U  | rs7930888  | 6.93                         | 6.62                                  | -0.134               | 0.08                         | 18.71                         | 0.13   | 7.114                             | 0.012   | 7.096           | 7.106  | 7.111           | 7.118                   | 7.179   |
| KRTAP5-2  | fXulQu4UoK3f19e_3U  | rs9651654  | 3.41                         | 3.27                                  | -0.063               | 0.33                         | 20.5                          | 0.19   | 7.114                             | 0.012   | 7.096           | 7.106  | 7.111           | 7.118                   | 7.179   |
| KRTAP5-2  | fXulQu4UoK3f19e_3U  | rs7116239  | 6.92                         | 6.61                                  | -0.138               | 0.15                         | 22.12                         | 0.2015 | 7.114                             | 0.012   | 7.096           | 7.106  | 7.111           | 7.118                   | 7.179   |
| KRTAP5-2  | fXulQu4UoK3f19e_3U  | rs7937618  | 7.13                         | 6.81                                  | 0.139                | 0.1                          | 27.59                         | 0.1275 | 7.114                             | 0.012   | 7.096           | 7.106  | 7.111           | 7.118                   | 7.179   |
| KRTAP5-2  | fXulQu4UoK3f19e_3U  | rs4752769  | 6.82                         | 6.52                                  | -0.135               | 0.24                         | 32.39                         | 0.34   | 7.114                             | 0.012   | 7.096           | 7.106  | 7.111           | 7.118                   | 7.179   |
| KRTAP5-2  | fXulQu4UoK3f19e_3U  | rs902219   | 4.46                         | 4.27                                  | -0.088               | 0.41                         | 33.92                         | 0.3775 | 7.114                             | 0.012   | 7.096           | 7.106  | 7.111           | 7.118                   | 7.179   |
| KRTAP5-2  | fXulQu4UoK3f19e_3U  | rs16927442 | 3.46                         | 3.32                                  | 0.066                | 0.85                         | 48.22                         | 0.1475 | 7.114                             | 0.012   | 7.096           | 7.106  | 7.111           | 7.118                   | 7.179   |
| KRTCAP3   | ueSgoaH0qknloDhlnY  | rs11675428 | 4.89                         | 4.68                                  | 0.099                | 1.75                         | -22.53                        | 0.19   | 7.484                             | 0.185   | 7.151           | 7.356  | 7.47            | 7.583                   | 8.285   |
| KRTCAP3   | ueSgoaH0qknloDhlnY  | rs704791   | 18.52                        | 17.66                                 | -0.343               | 4.61                         | -8.1                          | 0.3625 | 7.484                             | 0.185   | 7.151           | 7.356  | 7.47            | 7.583                   | 8.285   |
| KRTCAP3   | ueSgoaH0qknloDhlnY  | rs1260342  | 18.52                        | 17.66                                 | 0.343                | 4.61                         | -1.85                         | 0.3625 | 7.484                             | 0.185   | 7.151           | 7.356  | 7.47            | 7.583                   | 8.285   |
| KRTCAP3   | ueSgoaH0qknloDhlnY  | rs4803     | 18.52                        | 17.66                                 | 0.343                | 4.61                         | 0.13                          | 0.3625 | 7.484                             | 0.185   | 7.151           | 7.356  | 7.47            | 7.583                   | 8.285   |
| KRTCAP3   | ueSgoaH0qknloDhlnY  | rs780104   | 18.1                         | 17.25                                 | -0.336               | 4.47                         | 10.53                         | 0.36   | 7.484                             | 0.185   | 7.151           | 7.356  | 7.47            | 7.583                   | 8.285   |
| KRTCAP3   | ueSgoaH0qknloDhlnY  | rs780106   | 18.1                         | 17.25                                 | 0.336                | 4.47                         | 14.43                         | 0.36   | 7.484                             | 0.185   | 7.151           | 7.356  | 7.47            | 7.583                   | 8.285   |
| KRTCAP3   | ueSgoaH0qknloDhlnY  | rs1647276  | 18.52                        | 17.66                                 | 0.343                | 4.61                         | 21.44                         | 0.3625 | 7.484                             | 0.185   | 7.151           | 7.356  | 7.47            | 7.583                   | 8.285   |
| KRTCAP3   | ueSgoaH0qknloDhlnY  | rs1647266  | 18.32                        | 17.46                                 | -0.341               | 4.56                         | 26.32                         | 0.3643 | 7.484                             | 0.185   | 7.151           | 7.356  | 7.47            | 7.583                   | 8.285   |
| KRTCAP3   | ueSgoaH0qknloDhlnY  | rs1260345  | 15.04                        | 14.34                                 | 0.284                | 4                            | 36.33                         | 0.385  | 7.484                             | 0.185   | 7.151           | 7.356  | 7.47            | 7.583                   | 8.285   |
| KRTCAP3   | ueSgoaH0qknloDhlnY  | rs2272417  | 14.17                        | 13.52                                 | -0.272               | 3.84                         | 39.48                         | 0.3775 | 7.484                             | 0.185   | 7.151           | 7.356  | 7.47            | 7.583                   | 8.285   |
| L1TD1     | lfcVlKOhJwybH6o4ok  | rs10889294 | 3.57                         | 3.42                                  | 0.071                | 0.77                         | -30.17                        | 0.0725 | 7.181                             | 0.089   | 7.109           | 7.143  | 7.157           | 7.192                   | 7.862   |
| L3MBTL2   | oqluBEgV0lQo4SJ6KE  | rs5758251  | 3.72                         | 3.56                                  | -0.069               | 1.47                         | -30.57                        | 0.3375 | 9.639                             | 0.245   | 8.632           | 9.518  | 9.654           | 9.759                   | 10.576  |
| L3MBTL2   | oqluBEgV0lQo4SJ6KE  | rs139461   | 3.65                         | 3.49                                  | 0.068                | 1.19                         | 10.15                         | 0.345  | 9.639                             | 0.245   | 8.632           | 9.518  | 9.654           | 9.759                   | 10.576  |
| L3MBTL3   | lXdVYnUpWz9ReXHoTc  | rs1577910  | 4.53                         | 4.33                                  | -0.087               | 1.48                         | -43.91                        | 0.4825 | 7.242                             | 0.124   | 7.104           | 7.161  | 7.206           | 7.272                   | 7.865   |
| L3MBTL3   | lXdVYnUpWz9ReXHoTc  | rs6902109  | 4.65                         | 4.45                                  | -0.089               | 0.97                         | -23.18                        | 0.465  | 7.242                             | 0.124   | 7.104           | 7.161  | 7.206           | 7.272                   | 7.865   |
| L3MBTL3   | lXdVYnUpWz9ReXHoTc  | rs6569644  | 14.4                         | 13.73                                 | -0.273               | 3.18                         | -17.38                        | 0.2675 | 7.242                             | 0.124   | 7.104           | 7.161  | 7.206           | 7.272                   | 7.865   |
| L3MBTL3   | lXdVYnUpWz9ReXHoTc  | rs9492432  | 3.76                         | 3.60                                  | 0.071                | 2.73                         | -17.14                        | 0.205  | 7.242                             | 0.124   | 7.104           | 7.161  | 7.206           | 7.272                   | 7.865   |
| L3MBTL3   | lXdVYnUpWz9ReXHoTc  | rs9372951  | 7.11                         | 6.79                                  | -0.139               | 1.87                         | -10.54                        | 0.4025 | 7.242                             | 0.124   | 7.104           | 7.161  | 7.206           | 7.272                   | 7.865   |
| L3MBTL3   | lXdVYnUpWz9ReXHoTc  | rs1337775  | 7.97                         | 7.61                                  | -0.157               | 2.33                         | -5.37                         | 0.385  | 7.242                             | 0.124   | 7.104           | 7.161  | 7.206           | 7.272                   | 7.865   |
| L3MBTL3   | lXdVYnUpWz9ReXHoTc  | rs6569647  | 3.33                         | 3.19                                  | 0.063                | 1.27                         | -2.47                         | 0.21   | 7.242                             | 0.124   | 7.104           | 7.161  | 7.206           | 7.272                   | 7.865   |
| L3MBTL3   | lXdVYnUpWz9ReXHoTc  | rs6569648  | 23.33                        | 22.23                                 | -0.411               | 4.07                         | 9.38                          | 0.2275 | 7.242                             | 0.124   | 7.104           | 7.161  | 7.206           | 7.272                   | 7.865   |
| L3MBTL3   | lK.ID0KwBKlHn5LlU   | rs6569648  | 5.13                         | 4.90                                  | -0.099               | 4.49                         | 9.38                          | 0.2275 | 9.092                             | 0.372   | 8.006           | 8.847  | 9.086           | 9.353                   | 10.159  |
| L3MBTL3   | lXdVYnUpWz9ReXHoTc  | rs9388766  | 20.99                        | 20.00                                 | 0.373                | 3.99                         | 15.12                         | 0.29   | 7.242                             | 0.124   | 7.104           | 7.161  | 7.206           | 7.272                   | 7.865   |
| L3MBTL3   | lK.ID0KwBKlHn5LlU   | rs9388766  | 3.54                         | 3.39                                  | 0.065                | 4.51                         | 15.12                         | 0.29   | 9.092                             | 0.372   | 8.006           | 8.847  | 9.086           | 9.353                   | 10.159  |
| L3MBTL3   | lXdVYnUpWz9ReXHoTc  | rs6899976  | 20.99                        | 20.00                                 | 0.373                | 4.46                         | 18.69                         | 0.29   | 7.242                             | 0.124   | 7.104           | 7.161  | 7.206           | 7.272                   | 7.865   |
| L3MBTL3   | lK.ID0KwBKlHn5LlU   | rs6899976  | 3.54                         | 3.39                                  | 0.065                | 4.05                         | 18.69                         | 0.29   | 9.092                             | 0.372   | 8.006           | 8.847  | 9.086           | 9.353                   | 10.159  |
| L3MBTL3   | lXdVYnUpWz9ReXHoTc  | rs6928313  | 12.73                        | 12.15                                 | -0.24                | 4.32                         | 28.77                         | 0.41   | 7.242                             | 0.124   | 7.104           | 7.161  | 7.206           | 7.272                   | 7.865   |
| L3MBTL3   | lXdVYnUpWz9ReXHoTc  | rs3890746  | 12.73                        | 12.15                                 | -0.24                | 4.32                         | 31.32                         | 0.41   | 7.242                             | 0.124   | 7.104           | 7.161  | 7.206           | 7.272                   | 7.865   |
| L3MBTL3   | lXdVYnUpWz9ReXHoTc  | rs9388769  | 19.15                        | 18.25                                 | 0.345                | 4.7                          | 40.22                         | 0.31   | 7.242                             | 0.124   | 7.104           | 7.161  | 7.206           | 7.272                   | 7.865   |
| L3MBTL3   | lK.ID0KwBKlHn5LlU   | rs9388769  | 4.1                          | 3.93                                  | 0.077                | 4.29                         | 40.22                         | 0.31   | 9.092                             | 0.372   | 8.006           | 8.847  | 9.086           | 9.353                   | 10.159  |
| L3MBTL3   | lXdVYnUpWz9ReXHoTc  | rs10499173 | 20.06                        | 19.11                                 | 0.375                | 2.6                          | 53.41                         | 0.2381 | 7.242                             | 0.124   | 7.104           | 7.161  | 7.206           | 7.272                   | 7.865   |
| L3MBTL3   | lK.ID0KwBKlHn5LlU   | rs10499173 | 3.99                         | 3.82                                  | 0.079                | 1.82                         | 53.41                         | 0.2381 | 9.092                             | 0.372   | 8.006           | 8.847  | 9.086           | 9.353                   | 10.159  |
| L3MBTL3   | lXdVYnUpWz9ReXHoTc  | rs9321207  | 9.38                         | 8.95                                  | -0.18                | 2.81                         | 57.5                          | 0.395  | 7.242                             | 0.124   | 7.104           | 7.161  | 7.206           | 7.272                   | 7.865   |
| L3MBTL3   | lXdVYnUpWz9ReXHoTc  | rs4548027  | 20.83                        | 19.85                                 | -0.371               | 2.43                         | 57.78                         | 0.2325 | 7.242                             | 0.124   | 7.104           | 7.161  | 7.206           | 7.272                   | 7.865   |
| L3MBTL3   | lK.ID0KwBKlHn5LlU   | rs4548027  | 4.67                         | 4.47                                  | -0.089               | 3.9                          | 57.78                         | 0.2325 | 9.092                             | 0.372   | 8.006           | 8.847  | 9.086           | 9.353                   | 10.159  |
| L3MBTL3   | lXdVYnUpWz9ReXHoTc  | rs6569651  | 15.15                        | 14.45                                 | -0.284               | 2.85                         | -58.5                         | 0.2925 | 7.242                             | 0.124   | 7.104           | 7.161  | 7.206           | 7.272                   | 7.865   |



| Symbol  | Lumi nuID           | SNP        | Population-based | Population-based          | % Variance | Family-based     | Distance from   | MAF    | Mean      | Transcript abundance (log2 scale) |            |            |         |         | SNP mapping under probe |
|---------|---------------------|------------|------------------|---------------------------|------------|------------------|-----------------|--------|-----------|-----------------------------------|------------|------------|---------|---------|-------------------------|
|         |                     |            | association      | association               |            | association      |                 |        |           | Standard                          | 25th       | Median     | 75th    | Maximum |                         |
|         |                     |            | p-value (-log10) | p-value (-log10), GC adj. | Explained  | p-value (-log10) | transcript (kb) |        | Deviation | percentile                        | percentile | percentile | Maximum |         |                         |
| L3MBTL3 | Ik.ID0KwBKtLhN5LIU  | rs6569651  | 3.7              | 3.55                      | -0.069     | 4.08             | -58.5           | 0.2925 | 9.092     | 0.372                             | 8.006      | 8.847      | 9.086   | 9.353   | 10.159                  |
| L3MBTL3 | IXdVYnUpWz9ReXHoTc  | rs6569654  | 8.82             | 8.42                      | 0.177      | 2.08             | -52.52          | 0.3969 | 7.242     | 0.124                             | 7.104      | 7.161      | 7.206   | 7.272   | 7.865                   |
| L3MBTL3 | IXdVYnUpWz9ReXHoTc  | rs9483083  | 17.85            | 17.01                     | -0.334     | 1.48             | -45.64          | 0.2333 | 7.242     | 0.124                             | 7.104      | 7.161      | 7.206   | 7.272   | 7.865                   |
| L3MBTL3 | Ik.ID0KwBKtLhN5LIU  | rs9483083  | 3.86             | 3.70                      | -0.075     | 3.44             | -45.64          | 0.2333 | 9.092     | 0.372                             | 8.006      | 8.847      | 9.086   | 9.353   | 10.159                  |
| L3MBTL3 | IXdVYnUpWz9ReXHoTc  | rs7755589  | 14.64            | 13.96                     | -0.276     | 2.52             | -43.03          | 0.27   | 7.242     | 0.124                             | 7.104      | 7.161      | 7.206   | 7.272   | 7.865                   |
| L3MBTL3 | Ik.ID0KwBKtLhN5LIU  | rs7755589  | 3.46             | 3.31                      | -0.064     | 3.48             | -43.03          | 0.27   | 9.092     | 0.372                             | 8.006      | 8.847      | 9.086   | 9.353   | 10.159                  |
| L3MBTL3 | IXdVYnUpWz9ReXHoTc  | rs9402216  | 4.89             | 4.68                      | 0.094      | 2.17             | -30.16          | 0.4825 | 7.242     | 0.124                             | 7.104      | 7.161      | 7.206   | 7.272   | 7.865                   |
| L3MBTL3 | IXdVYnUpWz9ReXHoTc  | rs9321208  | 7.97             | 7.61                      | -0.157     | 1.49             | -29.3           | 0.3225 | 7.242     | 0.124                             | 7.104      | 7.161      | 7.206   | 7.272   | 7.865                   |
| L3MBTL3 | IXdVYnUpWz9ReXHoTc  | rs6914419  | 7.8              | 7.45                      | 0.154      | 1.77             | -26.11          | 0.3575 | 7.242     | 0.124                             | 7.104      | 7.161      | 7.206   | 7.272   | 7.865                   |
| L3MBTL3 | IXdVYnUpWz9ReXHoTc  | rs6901414  | 4.71             | 4.51                      | -0.092     | 1.35             | -21.27          | 0.4873 | 7.242     | 0.124                             | 7.104      | 7.161      | 7.206   | 7.272   | 7.865                   |
| L3MBTL3 | IXdVYnUpWz9ReXHoTc  | rs11154522 | 7.82             | 7.47                      | -0.156     | 1.78             | -21.12          | 0.365  | 7.242     | 0.124                             | 7.104      | 7.161      | 7.206   | 7.272   | 7.865                   |
| L3MBTL3 | IXdVYnUpWz9ReXHoTc  | rs12194709 | 9.47             | 9.04                      | -0.188     | 1.43             | -13.3           | 0.235  | 7.242     | 0.124                             | 7.104      | 7.161      | 7.206   | 7.272   | 7.865                   |
| LACTB2  | ERI.c5F.Hf10Ft3N4   | rs9650236  | 11.6             | 11.07                     | 0.232      | 5.06             | -35.14          | 0.0925 | 8.558     | 0.319                             | 7.829      | 8.347      | 8.545   | 8.749   | 9.37                    |
| LACTB2  | ERI.c5F.Hf10Ft3N4   | rs13271014 | 11.6             | 11.07                     | 0.232      | 5.06             | -20.23          | 0.0925 | 8.558     | 0.319                             | 7.829      | 8.347      | 8.545   | 8.749   | 9.37                    |
| LACTB2  | ERI.c5F.Hf10Ft3N4   | rs10504478 | 4.07             | 3.89                      | -0.079     | 3.59             | -4.57           | 0.1625 | 8.558     | 0.319                             | 7.829      | 8.347      | 8.545   | 8.749   | 9.37                    |
| LACTB2  | ERI.c5F.Hf10Ft3N4   | rs7831911  | 11.6             | 11.07                     | 0.232      | 5.06             | 5.22            | 0.0925 | 8.558     | 0.319                             | 7.829      | 8.347      | 8.545   | 8.749   | 9.37                    |
| LACTB2  | ERI.c5F.Hf10Ft3N4   | rs441890   | 8.54             | 8.15                      | -0.175     | 6.09             | 15.18           | 0.405  | 8.558     | 0.319                             | 7.829      | 8.347      | 8.545   | 8.749   | 9.37                    |
| LACTB2  | ERI.c5F.Hf10Ft3N4   | rs12675271 | 5.81             | 5.56                      | -0.117     | 4.35             | 20.62           | 0.47   | 8.558     | 0.319                             | 7.829      | 8.347      | 8.545   | 8.749   | 9.37                    |
| LACTB2  | ERI.c5F.Hf10Ft3N4   | rs268652   | 4.32             | 4.13                      | 0.087      | 2.12             | 34.57           | 0.1675 | 8.558     | 0.319                             | 7.829      | 8.347      | 8.545   | 8.749   | 9.37                    |
| LAIR2   | ZeCXWj_ORTg4ogOI1Y  | rs2042290  | 3.29             | 3.15                      | -0.06      | 0.82             | -0.24           | 0.1025 | 8.591     | 0.569                             | 7.148      | 8.31       | 8.572   | 8.827   | 10.818                  |
| LAIR2   | ZeCXWj_ORTg4ogOI1Y  | rs2042289  | 3.29             | 3.15                      | 0.06       | 0.82             | -0.19           | 0.1025 | 8.591     | 0.569                             | 7.148      | 8.31       | 8.572   | 8.827   | 10.818                  |
| LAIR2   | ZeCXWj_ORTg4ogOI1Y  | rs17606864 | 4.05             | 3.88                      | -0.074     | 0.34             | 30.38           | 0.1575 | 8.591     | 0.569                             | 7.148      | 8.31       | 8.572   | 8.827   | 10.818                  |
| LAMC3   | ZLKR3RV5E5MBqRFUu0  | rs4740396  | 4.04             | 3.87                      | 0.074      | 1.27             | 33.3            | 0.2337 | 7.457     | 0.286                             | 7.119      | 7.224      | 7.397   | 7.576   | 8.46                    |
| LAMC3   | ZLKR3RV5E5MBqRFUu0  | rs10901333 | 6.98             | 6.67                      | 0.133      | 2.77             | -39.57          | 0.485  | 7.457     | 0.286                             | 7.119      | 7.224      | 7.397   | 7.576   | 8.46                    |
| LAMC3   | ZLKR3RV5E5MBqRFUu0  | rs4740407  | 3.6              | 3.45                      | 0.064      | 0.77             | -20.87          | 0.395  | 7.457     | 0.286                             | 7.119      | 7.224      | 7.397   | 7.576   | 8.46                    |
| LAMC3   | ZLKR3RV5E5MBqRFUu0  | rs1109471  | 3.55             | 3.40                      | -0.063     | 0.79             | -12.17          | 0.3125 | 7.457     | 0.286                             | 7.119      | 7.224      | 7.397   | 7.576   | 8.46                    |
| LAMP3   | od5eCnRF0xSTGdF8So  | rs4859156  | 3.5              | 3.35                      | -0.065     | 2.37             | -24.91          | 0.3425 | 7.821     | 0.295                             | 7.283      | 7.641      | 7.796   | 7.934   | 9.991                   |
| LAMP3   | od5eCnRF0xSTGdF8So  | rs10513790 | 3.5              | 3.35                      | -0.065     | 2.37             | -24.45          | 0.3425 | 7.821     | 0.295                             | 7.283      | 7.641      | 7.796   | 7.934   | 9.991                   |
| LAPTM4B | EeHvfufu1KhOq4TI0   | rs2449519  | 3.85             | 3.68                      | -0.072     | 1.58             | -23.02          | 0.1    | 8.661     | 0.328                             | 7.638      | 8.429      | 8.662   | 8.903   | 9.475                   |
| LAPTM4B | EeHvfufu1KhOq4TI0   | rs2449529  | 8.24             | 7.87                      | -0.156     | 4.67             | -2.29           | 0.4675 | 8.661     | 0.328                             | 7.638      | 8.429      | 8.662   | 8.903   | 9.475                   |
| LAPTM4B | EeHvfufu1KhOq4TI0   | rs2917959  | 3.44             | 3.29                      | -0.062     | 1.07             | 28.39           | 0.495  | 8.661     | 0.328                             | 7.638      | 8.429      | 8.662   | 8.903   | 9.475                   |
| LAPTM4B | EeHvfufu1KhOq4TI0   | rs10955133 | 3.7              | 3.54                      | -0.068     | 1.09             | 30.39           | 0.4625 | 8.661     | 0.328                             | 7.638      | 8.429      | 8.662   | 8.903   | 9.475                   |
| LAPTM4B | EeHvfufu1KhOq4TI0   | rs7818662  | 4.02             | 3.85                      | -0.074     | 1.15             | -37.19          | 0.4675 | 8.661     | 0.328                             | 7.638      | 8.429      | 8.662   | 8.903   | 9.475                   |
| LAPTM4B | EeHvfufu1KhOq4TI0   | rs2449535  | 3.85             | 3.68                      | -0.071     | 1.18             | -23.18          | 0.465  | 8.661     | 0.328                             | 7.638      | 8.429      | 8.662   | 8.903   | 9.475                   |
| LAPTM4B | EeHvfufu1KhOq4TI0   | rs2262489  | 3.73             | 3.57                      | 0.069      | 1.18             | -21.23          | 0.4623 | 8.661     | 0.328                             | 7.638      | 8.429      | 8.662   | 8.903   | 9.475                   |
| LAPTM4B | EeHvfufu1KhOq4TI0   | rs2449545  | 6.6              | 6.31                      | 0.126      | 1.45             | -18.61          | 0.1775 | 8.661     | 0.328                             | 7.638      | 8.429      | 8.662   | 8.903   | 9.475                   |
| LAPTM4B | EeHvfufu1KhOq4TI0   | rs2449520  | 5.22             | 4.99                      | -0.098     | 0.75             | -13.73          | 0.191  | 8.661     | 0.328                             | 7.638      | 8.429      | 8.662   | 8.903   | 9.475                   |
| LAPTM4B | EeHvfufu1KhOq4TI0   | rs10504983 | 7.22             | 6.90                      | -0.137     | 1.49             | 1.23            | 0.17   | 8.661     | 0.328                             | 7.638      | 8.429      | 8.662   | 8.903   | 9.475                   |
| LARS2   | iUSa3p76gjpSg6HTFM  | rs17638423 | 3.62             | 3.46                      | -0.07      | 1.53             | 36.88           | 0.21   | 8.023     | 0.211                             | 7.511      | 7.88       | 8.043   | 8.166   | 8.644                   |
| LARS2   | iUSa3p76gjpSg6HTFM  | rs2291237  | 3.57             | 3.42                      | -0.068     | 2.59             | -35.28          | 0.3561 | 8.023     | 0.211                             | 7.511      | 7.88       | 8.043   | 8.166   | 8.644                   |
| LARS2   | iUSa3p76gjpSg6HTFM  | rs2118749  | 4.73             | 4.52                      | 0.093      | 1.84             | -18.07          | 0.2839 | 8.023     | 0.211                             | 7.511      | 7.88       | 8.043   | 8.166   | 8.644                   |
| LAX1    | Ep5AqDKeOie97Ose7o  | rs7540760  | 5.35             | 5.11                      | 0.105      | 4.13             | 0.65            | 0.19   | 10.038    | 0.377                             | 8.257      | 9.79       | 10.042  | 10.295  | 11.12                   |
| LAX1    | Ep5AqDKeOie97Ose7o  | rs3737973  | 5.68             | 5.43                      | -0.11      | 4.29             | -4.13           | 0.3975 | 10.038    | 0.377                             | 8.257      | 9.79       | 10.042  | 10.295  | 11.12                   |
| LAX1    | Ep5AqDKeOie97Ose7o  | rs2185080  | 4.06             | 3.89                      | 0.076      | 4.05             | 2.25            | 0.335  | 10.038    | 0.377                             | 8.257      | 9.79       | 10.042  | 10.295  | 11.12                   |
| LAX1    | Ep5AqDKeOie97Ose7o  | rs2185079  | 4.06             | 3.89                      | 0.076      | 4.05             | 2.27            | 0.335  | 10.038    | 0.377                             | 8.257      | 9.79       | 10.042  | 10.295  | 11.12                   |
| LCE3B   | 91157nUIXq57rpVJ3g  | rs4112788  | 3.53             | 3.38                      | 0.069      | 1.38             | -35.01          | 0.3525 | 7.134     | 0.025                             | 7.104      | 7.117      | 7.127   | 7.143   | 7.224                   |
| LCORL   | TXhU4kvsASujFBxdgk  | rs2286540  | 3.63             | 3.48                      | 0.07       | 1.67             | -35.3           | 0.1375 | 7.151     | 0.049                             | 7.1        | 7.127      | 7.14    | 7.16    | 7.502                   |
| LCORL   | TXhU4kvsASujFBxdgk  | rs16895877 | 4.09             | 3.91                      | -0.08      | 1.67             | 1.68            | 0.1313 | 7.151     | 0.049                             | 7.1        | 7.127      | 7.14    | 7.16    | 7.502                   |
| LCORL   | TXhU4kvsASujFBxdgk  | rs16895895 | 4.22             | 4.04                      | -0.082     | 1.7              | 9.93            | 0.1325 | 7.151     | 0.049                             | 7.1        | 7.127      | 7.14    | 7.16    | 7.502                   |
| LCORL   | TXhU4kvsASujFBxdgk  | rs6817306  | 3.4              | 3.26                      | -0.065     | 1.37             | 23.21           | 0.1375 | 7.151     | 0.049                             | 7.1        | 7.127      | 7.14    | 7.16    | 7.502                   |
| LCORL   | TXhU4kvsASujFBxdgk  | rs13144223 | 3.47             | 3.33                      | -0.067     | 1.78             | 27.86           | 0.135  | 7.151     | 0.049                             | 7.1        | 7.127      | 7.14    | 7.16    | 7.502                   |
| LCORL   | TXhU4kvsASujFBxdgk  | rs13102976 | 3.47             | 3.33                      | -0.067     | 1.73             | -43.55          | 0.135  | 7.151     | 0.049                             | 7.1        | 7.127      | 7.14    | 7.16    | 7.502                   |
| LDHC    | 6SSiogHZfletQbDunM  | rs7946331  | 4.5              | 4.30                      | 0.086      | 3.5              | -32.93          | 0.45   | 7.157     | 0.064                             | 7.106      | 7.119      | 7.129   | 7.169   | 7.474                   |
| LDHC    | 6SSiogHZfletQbDunM  | rs10766473 | 4.61             | 4.41                      | 0.089      | 3.5              | -32.38          | 0.4472 | 7.157     | 0.064                             | 7.106      | 7.119      | 7.129   | 7.169   | 7.474                   |
| LDHC    | 6SSiogHZfletQbDunM  | rs7112492  | 17.87            | 17.04                     | -0.336     | 5.61             | -28.4           | 0.1825 | 7.157     | 0.064                             | 7.106      | 7.119      | 7.129   | 7.169   | 7.474                   |
| LDHC    | 6SSiogHZfletQbDunM  | rs1830426  | 12.21            | 11.65                     | -0.234     | 4.37             | -14.37          | 0.2625 | 7.157     | 0.064                             | 7.106      | 7.119      | 7.129   | 7.169   | 7.474                   |
| LDHC    | 6SSiogHZfletQbDunM  | rs3758682  | 12.21            | 11.65                     | 0.234      | 4.37             | -4.44           | 0.2625 | 7.157     | 0.064                             | 7.106      | 7.119      | 7.129   | 7.169   | 7.474                   |
| LDHC    | 6SSiogHZfletQbDunM  | rs3809096  | 13.83            | 13.19                     | -0.269     | 4.22             | -0.07           | 0.201  | 7.157     | 0.064                             | 7.106      | 7.119      | 7.129   | 7.169   | 7.474                   |
| LDHC    | 6SSiogHZfletQbDunM  | rs16935476 | 3.34             | 3.20                      | 0.065      | 3.36             | 37.2            | 0.2575 | 7.157     | 0.064                             | 7.106      | 7.119      | 7.129   | 7.169   | 7.474                   |
| LDOC1L  | rSnnv1Q7QvPKsh1KK6g | rs133807   | 9.5              | 9.06                      | 0.198      | 2.01             | -49.78          | 0.48   | 8.731     | 0.295                             | 7.937      | 8.535      | 8.723   | 8.925   | 9.778                   |
| LDOC1L  | rSnnv1Q7QvPKsh1KK6g | rs133796   | 14.72            | 14.04                     | -0.285     | 2.09             | -46.31          | 0.47   | 8.731     | 0.295                             | 7.937      | 8.535      | 8.723   | 8.925   | 9.778                   |
| LDOC1L  | rSnnv1Q7QvPKsh1KK6g | rs133795   | 14.99            | 14.29                     | 0.289      | 2.09             | -46.1           | 0.4675 | 8.731     | 0.295                             | 7.937      | 8.535      | 8.723   | 8.925   | 9.778                   |

| Symbol  | Lumi nuID          | SNP        | Population-based association |                      |                               | Family-based association |        |        | Transcript abundance (log2 scale) |                 |        |                 |         |        | SNP mapping under probe |
|---------|--------------------|------------|------------------------------|----------------------|-------------------------------|--------------------------|--------|--------|-----------------------------------|-----------------|--------|-----------------|---------|--------|-------------------------|
|         |                    |            | p-value (-log10)             | % Variance Explained | Distance from transcript (kb) | p-value (-log10)         | MAF    | Mean   | Standard Deviation                | 25th percentile | Median | 75th percentile | Maximum |        |                         |
| LDOC1L  | rSnr1Q7QvPKsh1KK6g | rs133778   | 15.83                        | 15.09                | 0.304                         | 2.21                     | -43.66 | 0.465  | 8.731                             | 0.295           | 7.937  | 8.535           | 8.723   | 8.925  | 9.778                   |
| LDOC1L  | rSnr1Q7QvPKsh1KK6g | rs133771   | 6.55                         | 6.26                 | 0.133                         | 1.82                     | -43.04 | 0.26   | 8.731                             | 0.295           | 7.937  | 8.535           | 8.723   | 8.925  | 9.778                   |
| LDOC1L  | rSnr1Q7QvPKsh1KK6g | rs133753   | 17.14                        | 16.33                | 0.323                         | 2.54                     | -36.99 | 0.455  | 8.731                             | 0.295           | 7.937  | 8.535           | 8.723   | 8.925  | 9.778                   |
| LDOC1L  | rSnr1Q7QvPKsh1KK6g | rs8140396  | 5.26                         | 5.03                 | 0.104                         | 0.87                     | -21.66 | 0.2325 | 8.731                             | 0.295           | 7.937  | 8.535           | 8.723   | 8.925  | 9.778                   |
| LDOC1L  | rSnr1Q7QvPKsh1KK6g | rs2239770  | 5.18                         | 4.96                 | -0.103                        | 0.81                     | -12.8  | 0.235  | 8.731                             | 0.295           | 7.937  | 8.535           | 8.723   | 8.925  | 9.778                   |
| LDOC1L  | rSnr1Q7QvPKsh1KK6g | rs6007154  | 3.45                         | 3.30                 | 0.066                         | 0.68                     | -6.48  | 0.28   | 8.731                             | 0.295           | 7.937  | 8.535           | 8.723   | 8.925  | 9.778                   |
| LEPR    | cVnMVk0j4ahSCoE2H0 | rs1045895  | 4.49                         | 4.29                 | 0.086                         | 0.57                     | 11.66  | 0.395  | 7.164                             | 0.045           | 7.101  | 7.131           | 7.154   | 7.185  | 7.387                   |
| LEPREL2 | WqKzBXnXd1S3uQwK24 | rs4963517  | 4.64                         | 4.44                 | 0.088                         | 1.21                     | -1.21  | 0.4125 | 7.944                             | 0.299           | 7.25   | 7.731           | 7.905   | 8.138  | 9.153                   |
| LEPREL2 | WqKzBXnXd1S3uQwK24 | rs10744720 | 3.49                         | 3.35                 | 0.065                         | 1.59                     | 15.2   | 0.2183 | 7.944                             | 0.299           | 7.25   | 7.731           | 7.905   | 8.138  | 9.153                   |
| LEPROT  | ZXII88gOSDeCVR3oVI | rs10493377 | 4.12                         | 3.94                 | 0.078                         | 1.45                     | -7.07  | 0.4175 | 9.484                             | 0.443           | 8.154  | 9.218           | 9.527   | 9.758  | 11.022                  |
| LEPROT  | ZXII88gOSDeCVR3oVI | rs1045895  | 4.4                          | 4.21                 | 0.083                         | 0.94                     | -0.28  | 0.395  | 9.484                             | 0.443           | 8.154  | 9.218           | 9.527   | 9.758  | 11.022                  |
| LEPROT  | ZXII88gOSDeCVR3oVI | rs2025803  | 3.73                         | 3.57                 | -0.069                        | 1.3                      | 48.24  | 0.4697 | 9.484                             | 0.443           | 8.154  | 9.218           | 9.527   | 9.758  | 11.022                  |
| LETMD1  | xlUrqDXz_nyh41H1O8 | rs7299484  | 3.91                         | 3.74                 | 0.072                         | 0.87                     | -7.17  | 0.06   | 9.517                             | 0.272           | 7.712  | 9.389           | 9.533   | 9.673  | 10.296                  |
| LETMD1  | xlUrqDXz_nyh41H1O8 | rs6580783  | 4.24                         | 4.06                 | 0.08                          | 1.06                     | 1.64   | 0.0812 | 9.517                             | 0.272           | 7.712  | 9.389           | 9.533   | 9.673  | 10.296                  |
| LETMD1  | xlUrqDXz_nyh41H1O8 | rs4768959  | 4.14                         | 3.96                 | -0.076                        | 1.12                     | 3.58   | 0.0825 | 9.517                             | 0.272           | 7.712  | 9.389           | 9.533   | 9.673  | 10.296                  |
| LGALS2  | WT6GkkHqpCBBqCNF7k | rs5995460  | 3.49                         | 3.34                 | 0.064                         | 1.21                     | -14.8  | 0.3275 | 8.503                             | 0.939           | 7.127  | 7.802           | 8.272   | 9.034  | 11.26                   |
| LGALS2  | WT6GkkHqpCBBqCNF7k | rs2235336  | 3.62                         | 3.47                 | 0.066                         | 1.13                     | -7.99  | 0.3275 | 8.503                             | 0.939           | 7.127  | 7.802           | 8.272   | 9.034  | 11.26                   |
| LGALS2  | WT6GkkHqpCBBqCNF7k | rs5995463  | 4.03                         | 3.86                 | -0.075                        | 1.06                     | -7.04  | 0.36   | 8.503                             | 0.939           | 7.127  | 7.802           | 8.272   | 9.034  | 11.26                   |
| LGALS2  | WT6GkkHqpCBBqCNF7k | rs2076087  | 4.86                         | 4.65                 | -0.095                        | 1.05                     | -5.89  | 0.4775 | 8.503                             | 0.939           | 7.127  | 7.802           | 8.272   | 9.034  | 11.26                   |
| LGALS2  | WT6GkkHqpCBBqCNF7k | rs2235338  | 11.03                        | 10.52                | 0.219                         | 1.69                     | -0.37  | 0.45   | 8.503                             | 0.939           | 7.127  | 7.802           | 8.272   | 9.034  | 11.26                   |
| LGALS2  | WT6GkkHqpCBBqCNF7k | rs2281097  | 11.24                        | 10.73                | 0.223                         | 1.75                     | -0.19  | 0.4525 | 8.503                             | 0.939           | 7.127  | 7.802           | 8.272   | 9.034  | 11.26                   |
| LGP2    | cenynVkOoAQWipSJ8s | rs2074158  | 3.43                         | 3.29                 | 0.064                         | 0.84                     | 3.74   | 0.1825 | 8.674                             | 0.316           | 7.891  | 8.477           | 8.661   | 8.872  | 9.725                   |
| LGP2    | cenynVkOoAQWipSJ8s | rs1122326  | 3.95                         | 3.78                 | -0.076                        | 1.15                     | 10.12  | 0.2425 | 8.674                             | 0.316           | 7.891  | 8.477           | 8.661   | 8.872  | 9.725                   |
| LGP2    | cenynVkOoAQWipSJ8s | rs12603327 | 3.95                         | 3.78                 | 0.076                         | 1.15                     | 25.8   | 0.2425 | 8.674                             | 0.316           | 7.891  | 8.477           | 8.661   | 8.872  | 9.725                   |
| LGP2    | cenynVkOoAQWipSJ8s | rs7214921  | 3.95                         | 3.78                 | 0.076                         | 0.92                     | 29.27  | 0.2425 | 8.674                             | 0.316           | 7.891  | 8.477           | 8.661   | 8.872  | 9.725                   |
| LHPP    | cUKREqx.ehUeehIfgo | rs12569498 | 4.62                         | 4.42                 | 0.09                          | 0.57                     | 34.58  | 0.465  | 9.774                             | 0.305           | 8.662  | 9.586           | 9.796   | 9.978  | 10.521                  |
| LHPP    | cUKREqx.ehUeehIfgo | rs3824809  | 3.45                         | 3.30                 | -0.065                        | 0.85                     | 35.3   | 0.3317 | 9.774                             | 0.305           | 8.662  | 9.586           | 9.796   | 9.978  | 10.521                  |
| LIAS    | Z9S8MEiuuUg5eh5Lo4 | rs1458254  | 4.09                         | 3.92                 | 0.078                         | 2.31                     | -13.86 | 0.155  | 8.221                             | 0.21            | 7.641  | 8.097           | 8.235   | 8.351  | 8.737                   |
| LIAS    | Z9S8MEiuuUg5eh5Lo4 | rs13143990 | 4.09                         | 3.92                 | -0.078                        | 2.46                     | -2.07  | 0.155  | 8.221                             | 0.21            | 7.641  | 8.097           | 8.235   | 8.351  | 8.737                   |
| LIAS    | Z9S8MEiuuUg5eh5Lo4 | rs16995293 | 3.87                         | 3.71                 | 0.074                         | 2.1                      | 2.23   | 0.1533 | 8.221                             | 0.21            | 7.641  | 8.097           | 8.235   | 8.351  | 8.737                   |
| LIAS    | Z9S8MEiuuUg5eh5Lo4 | rs2687975  | 5.19                         | 4.97                 | 0.1                           | 2.07                     | -6.96  | 0.3015 | 8.221                             | 0.21            | 7.641  | 8.097           | 8.235   | 8.351  | 8.737                   |
| LIAS    | Z9S8MEiuuUg5eh5Lo4 | rs749915   | 4.9                          | 4.69                 | -0.095                        | 3.33                     | -4.41  | 0.21   | 8.221                             | 0.21            | 7.641  | 8.097           | 8.235   | 8.351  | 8.737                   |
| LIAS    | Z9S8MEiuuUg5eh5Lo4 | rs2687965  | 3.84                         | 3.68                 | -0.071                        | 2.07                     | 12.25  | 0.4675 | 8.221                             | 0.21            | 7.641  | 8.097           | 8.235   | 8.351  | 8.737                   |
| LIG3    | 3IRA193Vnfi71.sfUo | rs16970468 | 5.04                         | 4.82                 | -0.098                        | 2.42                     | -37.04 | 0.39   | 8.118                             | 0.195           | 7.531  | 8.004           | 8.112   | 8.226  | 8.965                   |
| LIG3    | 3IRA193Vnfi71.sfUo | rs1482103  | 4.04                         | 3.86                 | -0.079                        | 2.4                      | -19.89 | 0.45   | 8.118                             | 0.195           | 7.531  | 8.004           | 8.112   | 8.226  | 8.965                   |
| LIG3    | 3IRA193Vnfi71.sfUo | rs9635769  | 3.98                         | 3.81                 | -0.078                        | 2.32                     | -19.18 | 0.455  | 8.118                             | 0.195           | 7.531  | 8.004           | 8.112   | 8.226  | 8.965                   |
| LIG3    | 3IRA193Vnfi71.sfUo | rs3135998  | 3.75                         | 3.59                 | -0.072                        | 1.85                     | -9.77  | 0.3719 | 8.118                             | 0.195           | 7.531  | 8.004           | 8.112   | 8.226  | 8.965                   |
| LIG3    | 3IRA193Vnfi71.sfUo | rs3744358  | 3.64                         | 3.49                 | 0.069                         | 2.11                     | 4.83   | 0.335  | 8.118                             | 0.195           | 7.531  | 8.004           | 8.112   | 8.226  | 8.965                   |
| LILRA3  | 34uKI5_W44Z6kSKiK0 | rs410852   | 5.03                         | 4.81                 | 0.098                         | 2.41                     | 0.52   | 0.2965 | 9.097                             | 1.225           | 7.149  | 8.087           | 8.936   | 9.991  | 12.131                  |
| LILRA3  | Wj1WebcA0CZQ3TCxSk | rs410852   | 3.76                         | 3.60                 | 0.072                         | 3.11                     | 0.52   | 0.2965 | 7.636                             | 0.611           | 7.094  | 7.17            | 7.395   | 7.903  | 10.129                  |
| LILRA3  | 34uKI5_W44Z6kSKiK0 | rs651279   | 4.64                         | 4.44                 | 0.089                         | 3.23                     | 9.52   | 0.305  | 9.097                             | 1.225           | 7.149  | 8.087           | 8.936   | 9.991  | 12.131                  |
| LILRA3  | Wj1WebcA0CZQ3TCxSk | rs651279   | 3.92                         | 3.75                 | 0.075                         | 4.66                     | 9.52   | 0.305  | 7.636                             | 0.611           | 7.094  | 7.17            | 7.395   | 7.903  | 10.129                  |
| LILRA3  | 34uKI5_W44Z6kSKiK0 | rs759818   | 3.43                         | 3.28                 | -0.063                        | 2.41                     | 17.58  | 0.49   | 9.097                             | 1.225           | 7.149  | 8.087           | 8.936   | 9.991  | 12.131                  |
| LILRA3  | 34uKI5_W44Z6kSKiK0 | rs11084329 | 4.47                         | 4.28                 | 0.088                         | 2.98                     | 31.53  | 0.3333 | 9.097                             | 1.225           | 7.149  | 8.087           | 8.936   | 9.991  | 12.131                  |
| LILRA3  | Wj1WebcA0CZQ3TCxSk | rs11084329 | 4.03                         | 3.86                 | 0.079                         | 4.14                     | 31.53  | 0.3333 | 7.636                             | 0.611           | 7.094  | 7.17            | 7.395   | 7.903  | 10.129                  |
| LIM2    | KnThvfZKj.cTuZcWrk | rs1978456  | 3.38                         | 3.24                 | 0.066                         | 1.25                     | 3.55   | 0.27   | 7.114                             | 0.025           | 7.092  | 7.103           | 7.108   | 7.117  | 7.316                   |
| LIMS2   | Q_7YIfq6pSiiuOm0ig | rs2255177  | 8.07                         | 7.71                 | 0.158                         | 2.93                     | -2.71  | 0.305  | 7.966                             | 0.309           | 7.275  | 7.739           | 7.949   | 8.129  | 9.133                   |
| LIMS2   | Q_7YIfq6pSiiuOm0ig | rs2288657  | 9.55                         | 9.12                 | -0.184                        | 3.33                     | -0.5   | 0.0575 | 7.966                             | 0.309           | 7.275  | 7.739           | 7.949   | 8.129  | 9.133                   |
| LIMS2   | Q_7YIfq6pSiiuOm0ig | rs2244871  | 4.34                         | 4.15                 | 0.084                         | 1.59                     | 2.84   | 0.3995 | 7.966                             | 0.309           | 7.275  | 7.739           | 7.949   | 8.129  | 9.133                   |
| LIMS2   | Q_7YIfq6pSiiuOm0ig | rs2243934  | 6.43                         | 6.14                 | -0.126                        | 2.72                     | 9.92   | 0.065  | 7.966                             | 0.309           | 7.275  | 7.739           | 7.949   | 8.129  | 9.133                   |
| LINS1   | ZfoSEnek1jguN8vt50 | rs4965671  | 5.09                         | 4.87                 | 0.093                         | 1.84                     | -21.49 | 0.1625 | 8.427                             | 0.389           | 7.354  | 8.188           | 8.409   | 8.686  | 9.449                   |
| LINS1   | ZfoSEnek1jguN8vt50 | rs12460    | 11.33                        | 10.81                | 0.211                         | 4.62                     | 0.38   | 0.4675 | 8.427                             | 0.389           | 7.354  | 8.188           | 8.409   | 8.686  | 9.449                   |
| LINS1   | ZfoSEnek1jguN8vt50 | rs1532765  | 3.74                         | 3.58                 | -0.066                        | 1.37                     | 5.72   | 0.1675 | 8.427                             | 0.389           | 7.354  | 8.188           | 8.409   | 8.686  | 9.449                   |
| LINS1   | ZfoSEnek1jguN8vt50 | rs11247226 | 13.33                        | 12.71                | 0.243                         | 4.4                      | 11.53  | 0.4325 | 8.427                             | 0.389           | 7.354  | 8.188           | 8.409   | 8.686  | 9.449                   |
| LINS1   | ZfoSEnek1jguN8vt50 | rs12441485 | 7.24                         | 6.92                 | 0.138                         | 2.89                     | 15.39  | 0.47   | 8.427                             | 0.389           | 7.354  | 8.188           | 8.409   | 8.686  | 9.449                   |
| LINS1   | ZfoSEnek1jguN8vt50 | rs4965320  | 5.79                         | 5.54                 | 0.11                          | 3.32                     | 15.65  | 0.3725 | 8.427                             | 0.389           | 7.354  | 8.188           | 8.409   | 8.686  | 9.449                   |
| LINS1   | ZfoSEnek1jguN8vt50 | rs7180844  | 13.23                        | 12.61                | -0.242                        | 4.32                     | -6.32  | 0.4325 | 8.427                             | 0.389           | 7.354  | 8.188           | 8.409   | 8.686  | 9.449                   |
| LINS1   | ZfoSEnek1jguN8vt50 | rs3794503  | 3.81                         | 3.65                 | -0.067                        | 1.47                     | -0.48  | 0.165  | 8.427                             | 0.389           | 7.354  | 8.188           | 8.409   | 8.686  | 9.449                   |
| LIPA    | uVnHtvPjRN7uCUcVbo | rs7902290  | 3.41                         | 3.27                 | 0.066                         | 1.85                     | -41.73 | 0.1675 | 11.283                            | 0.432           | 8.971  | 11.028          | 11.262  | 11.552 | 12.215                  |
| LIPA    | uVnHtvPjRN7uCUcVbo | rs7091822  | 3.43                         | 3.28                 | -0.069                        | 1.44                     | -15.93 | 0.1718 | 11.283                            | 0.432           | 8.971  | 11.028          | 11.262  | 11.552 | 12.215                  |
| LIPC    | B7I4nkIKlnkEZ6nFG0 | rs4774297  | 3.49                         | 3.38                 | 0.067                         | 2.29                     | -3.74  | 0.4673 | 7.153                             | 0.073           | 7.098  | 7.117           | 7.127   | 7.149  | 7.548                   |
| LIPC    | B7I4nkIKlnkEZ6nFG0 | rs1077834  | 4.27                         | 4.09                 | -0.08                         | 2.73                     | -0.7   | 0.21   | 7.153                             | 0.073           | 7.098  | 7.117           | 7.127   | 7.149  | 7.548                   |

| Symbol    | Lumi nuID           | SNP        | Population-based association |                           |                      | Family-based association |                               |        | Transcript abundance (log2 scale) |                    |         |                 |        |                 | SNP mapping under probe |         |
|-----------|---------------------|------------|------------------------------|---------------------------|----------------------|--------------------------|-------------------------------|--------|-----------------------------------|--------------------|---------|-----------------|--------|-----------------|-------------------------|---------|
|           |                     |            | p-value (-log10)             | p-value (-log10), GC adj. | % Variance Explained | p-value (-log10)         | Distance from transcript (kb) | MAF    | Mean                              | Standard Deviation | Minimum | 25th percentile | Median | 75th percentile |                         | Maximum |
| LIPC      | B714nklKlnkEZ6nFG0  | rs473224   | 4.5                          | 4.31                      | 0.085                | 2.03                     | 13.17                         | 0.15   | 7.153                             | 0.073              | 7.098   | 7.117           | 7.127  | 7.149           | 7.548                   |         |
| LIPC      | B714nklKlnkEZ6nFG0  | rs573922   | 4.59                         | 4.40                      | -0.088               | 2.41                     | 15.92                         | 0.1775 | 7.153                             | 0.073              | 7.098   | 7.117           | 7.127  | 7.149           | 7.548                   |         |
| LIPC      | B714nklKlnkEZ6nFG0  | rs261336   | 4.47                         | 4.27                      | 0.085                | 2.03                     | 18.24                         | 0.18   | 7.153                             | 0.073              | 7.098   | 7.117           | 7.127  | 7.149           | 7.548                   |         |
| LIPC      | B714nklKlnkEZ6nFG0  | rs936960   | 13.8                         | 13.16                     | 0.268                | 3.25                     | 27.7                          | 0.0975 | 7.153                             | 0.073              | 7.098   | 7.117           | 7.127  | 7.149           | 7.548                   |         |
| LIPC      | B714nklKlnkEZ6nFG0  | rs12148268 | 3.88                         | 3.71                      | -0.075               | 0.56                     | 35.28                         | 0.4447 | 7.153                             | 0.073              | 7.098   | 7.117           | 7.127  | 7.149           | 7.548                   |         |
| LIPC      | B714nklKlnkEZ6nFG0  | rs7162855  | 5.81                         | 5.56                      | -0.111               | 2.44                     | -49.82                        | 0.09   | 7.153                             | 0.073              | 7.098   | 7.117           | 7.127  | 7.149           | 7.548                   |         |
| LMCD1     | QeQqh3qKL.Ug5D1i4k  | rs1562688  | 5.18                         | 4.96                      | 0.105                | 1.98                     | -43.19                        | 0.41   | 7.274                             | 0.084              | 7.113   | 7.215           | 7.27   | 7.318           | 7.597                   |         |
| LMCD1     | QeQqh3qKL.Ug5D1i4k  | rs1449345  | 4.29                         | 4.11                      | -0.086               | 1.45                     | -35.62                        | 0.35   | 7.274                             | 0.084              | 7.113   | 7.215           | 7.27   | 7.318           | 7.597                   |         |
| LMCD1     | QeQqh3qKL.Ug5D1i4k  | rs9864415  | 6.61                         | 6.31                      | -0.131               | 1.74                     | -30.84                        | 0.49   | 7.274                             | 0.084              | 7.113   | 7.215           | 7.27   | 7.318           | 7.597                   |         |
| LMCD1     | QeQqh3qKL.Ug5D1i4k  | rs10866089 | 5.96                         | 5.69                      | 0.116                | 1.72                     | -29.47                        | 0.38   | 7.274                             | 0.084              | 7.113   | 7.215           | 7.27   | 7.318           | 7.597                   |         |
| LMCD1     | QeQqh3qKL.Ug5D1i4k  | rs6777857  | 5.73                         | 5.48                      | 0.111                | 1.46                     | -24.18                        | 0.3875 | 7.274                             | 0.084              | 7.113   | 7.215           | 7.27   | 7.318           | 7.597                   |         |
| LMCD1     | QeQqh3qKL.Ug5D1i4k  | rs9811322  | 4.17                         | 3.99                      | -0.081               | 1.15                     | -19.17                        | 0.3618 | 7.274                             | 0.084              | 7.113   | 7.215           | 7.27   | 7.318           | 7.597                   |         |
| LMCD1     | QeQqh3qKL.Ug5D1i4k  | rs7647092  | 6                            | 5.73                      | 0.12                 | 2.1                      | -15.08                        | 0.5    | 7.274                             | 0.084              | 7.113   | 7.215           | 7.27   | 7.318           | 7.597                   |         |
| LMCD1     | QeQqh3qKL.Ug5D1i4k  | rs6793940  | 6.48                         | 6.19                      | -0.129               | 1.47                     | -8.51                         | 0.4825 | 7.274                             | 0.084              | 7.113   | 7.215           | 7.27   | 7.318           | 7.597                   |         |
| LMCD1     | QeQqh3qKL.Ug5D1i4k  | rs9312023  | 9.78                         | 9.33                      | -0.192               | 2                        | 2.59                          | 0.45   | 7.274                             | 0.084              | 7.113   | 7.215           | 7.27   | 7.318           | 7.597                   |         |
| LMCD1     | QeQqh3qKL.Ug5D1i4k  | rs9848605  | 7.2                          | 6.88                      | 0.143                | 0.45                     | 2.81                          | 0.48   | 7.274                             | 0.084              | 7.113   | 7.215           | 7.27   | 7.318           | 7.597                   |         |
| LMCD1     | QeQqh3qKL.Ug5D1i4k  | rs931685   | 6.54                         | 6.25                      | -0.127               | 0.52                     | 5.34                          | 0.4575 | 7.274                             | 0.084              | 7.113   | 7.215           | 7.27   | 7.318           | 7.597                   |         |
| LMCD1     | QeQqh3qKL.Ug5D1i4k  | rs1994876  | 6.62                         | 6.33                      | 0.13                 | 0.65                     | 6.15                          | 0.4394 | 7.274                             | 0.084              | 7.113   | 7.215           | 7.27   | 7.318           | 7.597                   |         |
| LMCD1     | QeQqh3qKL.Ug5D1i4k  | rs6784560  | 6.4                          | 6.12                      | -0.124               | 0.6                      | 13.61                         | 0.4575 | 7.274                             | 0.084              | 7.113   | 7.215           | 7.27   | 7.318           | 7.597                   |         |
| LMCD1     | QeQqh3qKL.Ug5D1i4k  | rs1947220  | 4.75                         | 4.54                      | 0.092                | 0.43                     | 19.13                         | 0.475  | 7.274                             | 0.084              | 7.113   | 7.215           | 7.27   | 7.318           | 7.597                   |         |
| LMCD1     | QeQqh3qKL.Ug5D1i4k  | rs17784210 | 3.39                         | 3.25                      | -0.068               | 0.61                     | 25.11                         | 0.1675 | 7.274                             | 0.084              | 7.113   | 7.215           | 7.27   | 7.318           | 7.597                   |         |
| LMCD1     | QeQqh3qKL.Ug5D1i4k  | rs17784233 | 5.06                         | 4.84                      | -0.1                 | 0.34                     | 26.88                         | 0.4645 | 7.274                             | 0.084              | 7.113   | 7.215           | 7.27   | 7.318           | 7.597                   |         |
| LMCD1     | QeQqh3qKL.Ug5D1i4k  | rs6784926  | 3.52                         | 3.37                      | -0.066               | 0.1                      | -29.96                        | 0.45   | 7.274                             | 0.084              | 7.113   | 7.215           | 7.27   | 7.318           | 7.597                   |         |
| LMCD1     | QeQqh3qKL.Ug5D1i4k  | rs9836284  | 6.6                          | 6.31                      | -0.13                | 0.84                     | -25.51                        | 0.4525 | 7.274                             | 0.084              | 7.113   | 7.215           | 7.27   | 7.318           | 7.597                   |         |
| LMCD1     | QeQqh3qKL.Ug5D1i4k  | rs1545416  | 6.09                         | 5.82                      | -0.124               | 0.94                     | -17.23                        | 0.265  | 7.274                             | 0.084              | 7.113   | 7.215           | 7.27   | 7.318           | 7.597                   |         |
| LMCD1     | QeQqh3qKL.Ug5D1i4k  | rs165174   | 6.53                         | 6.24                      | 0.129                | 3.09                     | 8.5                           | 0.365  | 7.274                             | 0.084              | 7.113   | 7.215           | 7.27   | 7.318           | 7.597                   |         |
| LMCD1     | QeQqh3qKL.Ug5D1i4k  | rs7635151  | 3.3                          | 3.17                      | -0.063               | 2.38                     | 10.26                         | 0.375  | 7.274                             | 0.084              | 7.113   | 7.215           | 7.27   | 7.318           | 7.597                   |         |
| LMCD1     | QeQqh3qKL.Ug5D1i4k  | rs355137   | 6.73                         | 6.43                      | -0.134               | 3.06                     | 10.37                         | 0.3625 | 7.274                             | 0.084              | 7.113   | 7.215           | 7.27   | 7.318           | 7.597                   |         |
| LMCD1     | QeQqh3qKL.Ug5D1i4k  | rs956377   | 3.3                          | 3.17                      | -0.063               | 2.38                     | 11.6                          | 0.375  | 7.274                             | 0.084              | 7.113   | 7.215           | 7.27   | 7.318           | 7.597                   |         |
| LMCD1     | QeQqh3qKL.Ug5D1i4k  | rs11131137 | 3.65                         | 3.49                      | -0.071               | 2.61                     | 14                            | 0.3668 | 7.274                             | 0.084              | 7.113   | 7.215           | 7.27   | 7.318           | 7.597                   |         |
| LMCD1     | QeQqh3qKL.Ug5D1i4k  | rs4686274  | 4.89                         | 4.68                      | 0.097                | 3.06                     | 20.51                         | 0.32   | 7.274                             | 0.084              | 7.113   | 7.215           | 7.27   | 7.318           | 7.597                   |         |
| LMCD1     | QeQqh3qKL.Ug5D1i4k  | rs371734   | 5.26                         | 5.03                      | 0.103                | 2.01                     | 29.76                         | 0.3125 | 7.274                             | 0.084              | 7.113   | 7.215           | 7.27   | 7.318           | 7.597                   |         |
| LMCD1     | QeQqh3qKL.Ug5D1i4k  | rs1703132  | 5.26                         | 5.03                      | -0.103               | 3.33                     | 31.33                         | 0.3125 | 7.274                             | 0.084              | 7.113   | 7.215           | 7.27   | 7.318           | 7.597                   |         |
| LMLN      | NutFd6fcpDe.Xeeno   | rs6782303  | 3.44                         | 3.29                      | -0.065               | 0.31                     | -40.84                        | 0.2475 | 7.199                             | 0.073              | 7.1     | 7.145           | 7.179  | 7.233           | 7.597                   |         |
| LMLN      | NutFd6fcpDe.Xeeno   | rs7431003  | 3.92                         | 3.75                      | -0.074               | 0.06                     | 2.14                          | 0.2525 | 7.199                             | 0.073              | 7.1     | 7.145           | 7.179  | 7.233           | 7.597                   |         |
| LNPEP     | 99xXCJZTR9KWev7SU0  | rs4869315  | 3.4                          | 3.26                      | 0.063                | 1.31                     | -42.07                        | 0.44   | 8.324                             | 0.208              | 7.795   | 8.183           | 8.316  | 8.445           | 9.072                   |         |
| LOC115648 | Zi6r7B_vkKeevcTyrU  | rs7258086  | 9.82                         | 9.37                      | 0.195                | 4.38                     | -44.25                        | 0.2725 | 7.342                             | 0.109              | 7.118   | 7.257           | 7.335  | 7.417           | 7.657                   |         |
| LOC115648 | Zi6r7B_vkKeevcTyrU  | rs8103325  | 10.63                        | 10.14                     | 0.212                | 3.02                     | -31.75                        | 0.465  | 7.342                             | 0.109              | 7.118   | 7.257           | 7.335  | 7.417           | 7.657                   |         |
| LOC115648 | Zi6r7B_vkKeevcTyrU  | rs7247411  | 10.42                        | 9.94                      | -0.211               | 2.59                     | -4.59                         | 0.4621 | 7.342                             | 0.109              | 7.118   | 7.257           | 7.335  | 7.417           | 7.657                   |         |
| LOC115648 | Zi6r7B_vkKeevcTyrU  | rs2937161  | 9.29                         | 8.87                      | -0.185               | 3.49                     | 22.23                         | 0.28   | 7.342                             | 0.109              | 7.118   | 7.257           | 7.335  | 7.417           | 7.657                   |         |
| LOC115648 | Zi6r7B_vkKeevcTyrU  | rs12151222 | 7.43                         | 7.10                      | 0.151                | 2.83                     | 27.44                         | 0.2538 | 7.342                             | 0.109              | 7.118   | 7.257           | 7.335  | 7.417           | 7.657                   |         |
| LOC115648 | Zi6r7B_vkKeevcTyrU  | rs3951363  | 3.81                         | 3.65                      | -0.073               | 1.05                     | 26.05                         | 0.2025 | 7.342                             | 0.109              | 7.118   | 7.257           | 7.335  | 7.417           | 7.657                   |         |
| _OC149643 | KX8eMUQUUCJe9UEukok | rs11120027 | 4.7                          | 4.50                      | 0.09                 | 0.46                     | -41.28                        | 0.3719 | 7.126                             | 0.017              | 7.101   | 7.115           | 7.122  | 7.133           | 7.181                   |         |
| _OC149643 | KX8eMUQUUCJe9UEukok | rs1390501  | 3.52                         | 3.37                      | -0.066               | 1.02                     | 44.05                         | 0.3525 | 7.126                             | 0.017              | 7.101   | 7.115           | 7.122  | 7.133           | 7.181                   |         |
| _OC149643 | KX8eMUQUUCJe9UEukok | rs3207090  | 3.9                          | 3.74                      | 0.073                | 1.17                     | 47.6                          | 0.46   | 7.126                             | 0.017              | 7.101   | 7.115           | 7.122  | 7.133           | 7.181                   |         |
| _OC198437 | i6IU16KIG6OkU31Zrg  | rs7271530  | 4.5                          | 4.40                      | -0.093               | 2.48                     | 12.2                          | 0.4369 | 7.26                              | 0.108              | 7.105   | 7.174           | 7.233  | 7.335           | 7.723                   |         |
| _OC283551 | fe5yHikleCR5kJE6AI  | rs7145362  | 3.66                         | 3.50                      | 0.072                | 0.38                     | -9.95                         | 0.4925 | 7.104                             | 0.007              | 7.091   | 7.099           | 7.103  | 7.107           | 7.137                   | Yes     |
| _OC284751 | cn3Tf6L4nkp6iXoKV0  | rs6091130  | 3.82                         | 3.66                      | -0.073               | 0.03                     | 5.08                          | 0.175  | 7.115                             | 0.013              | 7.095   | 7.105           | 7.112  | 7.121           | 7.171                   |         |
| _OC284751 | cn3Tf6L4nkp6iXoKV0  | rs7269352  | 4.38                         | 4.20                      | 0.083                | 0.1                      | 9.15                          | 0.4475 | 7.115                             | 0.013              | 7.095   | 7.105           | 7.112  | 7.121           | 7.171                   |         |
| _OC286076 | TbrJR6SX4eAigotTrk  | rs3750203  | 3.41                         | 3.26                      | -0.063               | 4.23                     | -48.1                         | 0.355  | 7.278                             | 0.189              | 7.108   | 7.159           | 7.216  | 7.326           | 8.707                   |         |
| _OC286076 | TbrJR6SX4eAigotTrk  | rs6558383  | 3.95                         | 3.78                      | 0.078                | 4.66                     | -6.44                         | 0.14   | 7.278                             | 0.189              | 7.108   | 7.159           | 7.216  | 7.326           | 8.707                   |         |
| _OC286076 | TbrJR6SX4eAigotTrk  | rs11136316 | 3.95                         | 3.78                      | -0.078               | 4.66                     | -1.76                         | 0.14   | 7.278                             | 0.189              | 7.108   | 7.159           | 7.216  | 7.326           | 8.707                   |         |
| _OC286076 | TbrJR6SX4eAigotTrk  | rs7464821  | 3.56                         | 3.41                      | 0.07                 | 5.09                     | -0.35                         | 0.16   | 7.278                             | 0.189              | 7.108   | 7.159           | 7.216  | 7.326           | 8.707                   |         |
| _OC340156 | TQUccVPSCJICTee7YI  | rs11756522 | 3.3                          | 3.16                      | -0.057               | 2.83                     | 11.97                         | 0.2475 | 7.233                             | 0.104              | 7.117   | 7.169           | 7.216  | 7.264           | 8.256                   |         |
| _OC340156 | TQUccVPSCJICTee7YI  | rs2038760  | 6.34                         | 6.06                      | 0.118                | 3.36                     | 16.86                         | 0.19   | 7.233                             | 0.104              | 7.117   | 7.169           | 7.216  | 7.264           | 8.256                   |         |
| _OC352909 | 9410pX46VX71SkV7o   | rs2288419  | 3.64                         | 3.48                      | -0.068               | 2.81                     | 15.23                         | 0.2175 | 7.158                             | 0.042              | 7.104   | 7.132           | 7.147  | 7.172           | 7.396                   |         |
| _OC389791 | ZJN1JRen_eu6XzJfA   | rs6478823  | 3.43                         | 3.28                      | 0.063                | 2.96                     | 13.94                         | 0.3325 | 7.764                             | 0.254              | 7.163   | 7.59            | 7.736  | 7.927           | 8.471                   |         |
| _OC400506 | f3SHzq6fQAXIV9vSWU  | rs1858973  | 11.93                        | 11.38                     | -0.225               | 3.2                      | 17.29                         | 0.1975 | 7.597                             | 0.162              | 7.224   | 7.49            | 7.582  | 7.686           | 8.057                   |         |
| _OC400506 | f3SHzq6fQAXIV9vSWU  | rs4782279  | 11.93                        | 11.38                     | 0.225                | 3.16                     | 32.65                         | 0.1975 | 7.597                             | 0.162              | 7.224   | 7.49            | 7.582  | 7.686           | 8.057                   |         |
| _OC400506 | f3SHzq6fQAXIV9vSWU  | rs8053136  | 7.86                         | 7.57                      | -0.152               | 1.87                     | 40.77                         | 0.2186 | 7.597                             | 0.162              | 7.224   | 7.49            | 7.582  | 7.686           | 8.057                   |         |
| _OC400566 | c9EaGGWHDU0UJ5Xa8   | rs4366776  | 5.98                         | 5.71                      | -0.12                | 1.32                     | -43.67                        | 0.459  | 7.505                             | 0.393              | 7.101   | 7.183           | 7.275  | 7.811           | 8.713                   |         |
| _OC400566 | ff5976WihjeBd_iX8   | rs4366776  | 5.23                         | 5.00                      | -0.103               | 1.13                     | -43.67                        | 0.459  | 7.879                             | 0.69               | 7.142   | 7.294           | 7.445  | 8.533           | 9.752                   |         |

| Symbol     | Lumi nuID          | SNP        | Population-based association |                      |         | Family-based association |                               |        | Transcript abundance (log2 scale) |                    |         |                 |        |                 | SNP mapping under probe |         |
|------------|--------------------|------------|------------------------------|----------------------|---------|--------------------------|-------------------------------|--------|-----------------------------------|--------------------|---------|-----------------|--------|-----------------|-------------------------|---------|
|            |                    |            | p-value (-log10)             | % Variance Explained | GC adj. | p-value (-log10)         | Distance from transcript (kb) | MAF    | Mean                              | Standard Deviation | Minimum | 25th percentile | Median | 75th percentile |                         | Maximum |
| ..OC400566 | c9rEaGGWHdU0UJ5Xa8 | rs11150880 | 7.24                         | 6.91                 | 0.144   | 1.34                     | -22.77                        | 0.475  | 7.505                             | 0.393              | 7.101   | 7.183           | 7.275  | 7.811           | 8.713                   |         |
| ..OC400566 | ff5976WihjleBd_iX8 | rs11150880 | 7.03                         | 6.72                 | 0.139   | 1.1                      | -22.77                        | 0.475  | 7.879                             | 0.69               | 7.142   | 7.294           | 7.445  | 8.533           | 9.752                   |         |
| ..OC400566 | ff5976WihjleBd_iX8 | rs8077538  | 14.89                        | 14.20                | 0.291   | 3.3                      | -18.6                         | 0.095  | 7.879                             | 0.69               | 7.142   | 7.294           | 7.445  | 8.533           | 9.752                   |         |
| ..OC400566 | c9rEaGGWHdU0UJ5Xa8 | rs8077538  | 14.11                        | 13.46                | 0.279   | 3.26                     | -18.6                         | 0.095  | 7.505                             | 0.393              | 7.101   | 7.183           | 7.275  | 7.811           | 8.713                   |         |
| ..OC400566 | c9rEaGGWHdU0UJ5Xa8 | rs6565724  | 31.46                        | 29.96                | -0.539  | 5.66                     | 6.46                          | 0.3325 | 7.505                             | 0.393              | 7.101   | 7.183           | 7.275  | 7.811           | 8.713                   |         |
| ..OC400566 | ff5976WihjleBd_iX8 | rs6565724  | 27.82                        | 26.50                | -0.491  | 6.16                     | 6.46                          | 0.3325 | 7.879                             | 0.69               | 7.142   | 7.294           | 7.445  | 8.533           | 9.752                   |         |
| ..OC400566 | ff5976WihjleBd_iX8 | rs11871257 | 3.95                         | 3.78                 | 0.076   | 0.35                     | 22.88                         | 0.3525 | 7.879                             | 0.69               | 7.142   | 7.294           | 7.445  | 8.533           | 9.752                   |         |
| ..OC400566 | c9rEaGGWHdU0UJ5Xa8 | rs11871257 | 3.38                         | 3.23                 | 0.064   | 0.17                     | 22.88                         | 0.3525 | 7.505                             | 0.393              | 7.101   | 7.183           | 7.275  | 7.811           | 8.713                   |         |
| ..OC400566 | c9rEaGGWHdU0UJ5Xa8 | rs8076098  | 7.43                         | 7.10                 | 0.146   | 0.97                     | 23.66                         | 0.1275 | 7.505                             | 0.393              | 7.101   | 7.183           | 7.275  | 7.811           | 8.713                   |         |
| ..OC400566 | ff5976WihjleBd_iX8 | rs8076098  | 6.2                          | 5.92                 | 0.121   | 1.03                     | 23.66                         | 0.1275 | 7.879                             | 0.69               | 7.142   | 7.294           | 7.445  | 8.533           | 9.752                   |         |
| ..OC400707 | BISkUXuJCEU9KszqXQ | rs8109759  | 9.91                         | 9.46                 | -0.188  | 4.76                     | -48.1                         | 0.2789 | 7.457                             | 0.294              | 7.136   | 7.242           | 7.359  | 7.579           | 8.684                   |         |
| ..OC400707 | BISkUXuJCEU9KszqXQ | rs2311223  | 10.26                        | 9.79                 | 0.192   | 4.54                     | -45.54                        | 0.2375 | 7.457                             | 0.294              | 7.136   | 7.242           | 7.359  | 7.579           | 8.684                   |         |
| ..OC400707 | BISkUXuJCEU9KszqXQ | rs17728638 | 3.88                         | 3.72                 | 0.066   | 1.79                     | -45.13                        | 0.19   | 7.457                             | 0.294              | 7.136   | 7.242           | 7.359  | 7.579           | 8.684                   |         |
| ..OC400707 | BISkUXuJCEU9KszqXQ | rs11671212 | 3.66                         | 3.51                 | 0.066   | 3.52                     | -44.28                        | 0.395  | 7.457                             | 0.294              | 7.136   | 7.242           | 7.359  | 7.579           | 8.684                   |         |
| ..OC400707 | BISkUXuJCEU9KszqXQ | rs10416550 | 21.45                        | 20.44                | 0.368   | 6.48                     | -43.5                         | 0.175  | 7.457                             | 0.294              | 7.136   | 7.242           | 7.359  | 7.579           | 8.684                   |         |
| ..OC400707 | BISkUXuJCEU9KszqXQ | rs11083830 | 3.75                         | 3.59                 | -0.063  | 1.49                     | -30.54                        | 0.195  | 7.457                             | 0.294              | 7.136   | 7.242           | 7.359  | 7.579           | 8.684                   |         |
| ..OC400707 | BISkUXuJCEU9KszqXQ | rs8107491  | 20.77                        | 19.80                | 0.358   | 8.03                     | -22.6                         | 0.2875 | 7.457                             | 0.294              | 7.136   | 7.242           | 7.359  | 7.579           | 8.684                   |         |
| ..OC400707 | BISkUXuJCEU9KszqXQ | rs877589   | 22.08                        | 21.04                | -0.373  | 8.1                      | -15.82                        | 0.3275 | 7.457                             | 0.294              | 7.136   | 7.242           | 7.359  | 7.579           | 8.684                   |         |
| ..OC400707 | BISkUXuJCEU9KszqXQ | rs2288913  | 9.28                         | 8.86                 | -0.179  | 4.52                     | -13.56                        | 0.3945 | 7.457                             | 0.294              | 7.136   | 7.242           | 7.359  | 7.579           | 8.684                   |         |
| ..OC400707 | BISkUXuJCEU9KszqXQ | rs7254929  | 26.49                        | 25.23                | -0.43   | 7.35                     | -6.46                         | 0.2275 | 7.457                             | 0.294              | 7.136   | 7.242           | 7.359  | 7.579           | 8.684                   |         |
| ..OC400707 | BISkUXuJCEU9KszqXQ | rs8112461  | 14.36                        | 13.69                | 0.273   | 4.61                     | 1.62                          | 0.3125 | 7.457                             | 0.294              | 7.136   | 7.242           | 7.359  | 7.579           | 8.684                   |         |
| ..OC400707 | BISkUXuJCEU9KszqXQ | rs6509283  | 10.19                        | 9.73                 | 0.196   | 3.36                     | 20.81                         | 0.41   | 7.457                             | 0.294              | 7.136   | 7.242           | 7.359  | 7.579           | 8.684                   |         |
| ..OC400707 | BISkUXuJCEU9KszqXQ | rs10408465 | 7.41                         | 7.08                 | -0.133  | 2.67                     | 25.9                          | 0.22   | 7.457                             | 0.294              | 7.136   | 7.242           | 7.359  | 7.579           | 8.684                   |         |
| ..OC400707 | BISkUXuJCEU9KszqXQ | rs3745795  | 3.93                         | 3.76                 | -0.069  | 3.51                     | 30.68                         | 0.32   | 7.457                             | 0.294              | 7.136   | 7.242           | 7.359  | 7.579           | 8.684                   |         |
| ..OC401233 | QfyhEI_TcJbggfqkvk | rs3823096  | 3.47                         | 3.32                 | 0.066   | 1.42                     | -4.73                         | 0.42   | 8.118                             | 0.508              | 7.143   | 7.864           | 8.13   | 8.44            | 9.759                   |         |
| ..OC401233 | QfyhEI_TcJbggfqkvk | rs6920375  | 3.75                         | 3.59                 | 0.072   | 1.26                     | 1.47                          | 0.475  | 8.118                             | 0.508              | 7.143   | 7.864           | 8.13   | 8.44            | 9.759                   |         |
| ..OC401233 | QfyhEI_TcJbggfqkvk | rs927340   | 8.95                         | 8.54                 | 0.175   | 2.44                     | -0.41                         | 0.1425 | 8.118                             | 0.508              | 7.143   | 7.864           | 8.13   | 8.44            | 9.759                   |         |
| ..OC401233 | QfyhEI_TcJbggfqkvk | rs911536   | 7.9                          | 7.55                 | 0.155   | 1.97                     | 3                             | 0.125  | 8.118                             | 0.508              | 7.143   | 7.864           | 8.13   | 8.44            | 9.759                   |         |
| ..OC401233 | QfyhEI_TcJbggfqkvk | rs1885300  | 10.06                        | 9.60                 | -0.198  | 3.92                     | 5                             | 0.2275 | 8.118                             | 0.508              | 7.143   | 7.864           | 8.13   | 8.44            | 9.759                   |         |
| ..OC401233 | QfyhEI_TcJbggfqkvk | rs7762140  | 14.16                        | 13.50                | 0.27    | 4.18                     | 12.53                         | 0.21   | 8.118                             | 0.508              | 7.143   | 7.864           | 8.13   | 8.44            | 9.759                   |         |
| ..OC401233 | QfyhEI_TcJbggfqkvk | rs1040521  | 27.36                        | 26.06                | 0.475   | 8.17                     | 15.48                         | 0.3889 | 8.118                             | 0.508              | 7.143   | 7.864           | 8.13   | 8.44            | 9.759                   |         |
| ..OC401233 | QfyhEI_TcJbggfqkvk | rs7774283  | 28                           | 26.67                | 0.482   | 8.35                     | 17.07                         | 0.385  | 8.118                             | 0.508              | 7.143   | 7.864           | 8.13   | 8.44            | 9.759                   |         |
| ..OC401233 | QfyhEI_TcJbggfqkvk | rs7761969  | 20.2                         | 19.25                | 0.375   | 6.39                     | 25.85                         | 0.3775 | 8.118                             | 0.508              | 7.143   | 7.864           | 8.13   | 8.44            | 9.759                   |         |
| ..OC401233 | QfyhEI_TcJbggfqkvk | rs7765538  | 8.77                         | 8.37                 | -0.172  | 2.74                     | 31.75                         | 0.22   | 8.118                             | 0.508              | 7.143   | 7.864           | 8.13   | 8.44            | 9.759                   |         |
| ..OC401233 | QfyhEI_TcJbggfqkvk | rs7775816  | 6.43                         | 6.14                 | 0.133   | 3.49                     | 33.28                         | 0.1784 | 8.118                             | 0.508              | 7.143   | 7.864           | 8.13   | 8.44            | 9.759                   |         |
| ..OC401233 | QfyhEI_TcJbggfqkvk | rs12200314 | 20.73                        | 19.76                | -0.383  | 7.14                     | 34.56                         | 0.4025 | 8.118                             | 0.508              | 7.143   | 7.864           | 8.13   | 8.44            | 9.759                   |         |
| ..OC401233 | QfyhEI_TcJbggfqkvk | rs6596945  | 5.33                         | 5.10                 | 0.103   | 2.47                     | 47.78                         | 0.18   | 8.118                             | 0.508              | 7.143   | 7.864           | 8.13   | 8.44            | 9.759                   |         |
| ..OC401431 | xlkaPVLZAVAl_eX_Xc | rs6464035  | 8.71                         | 8.31                 | 0.171   | 0.84                     | -4.79                         | 0.36   | 8.25                              | 0.31               | 7.437   | 8.037           | 8.213  | 8.458           | 9.215                   |         |
| ..OC401431 | xlkaPVLZAVAl_eX_Xc | rs3735333  | 8.39                         | 8.01                 | -0.165  | 0.61                     | 0.3                           | 0.3643 | 8.25                              | 0.31               | 7.437   | 8.037           | 8.213  | 8.458           | 9.215                   |         |
| ..OC401431 | xlkaPVLZAVAl_eX_Xc | rs12703055 | 5.06                         | 4.84                 | -0.099  | 1.02                     | 12.03                         | 0.2725 | 8.25                              | 0.31               | 7.437   | 8.037           | 8.213  | 8.458           | 9.215                   |         |
| ..OC401431 | xlkaPVLZAVAl_eX_Xc | rs10807976 | 8.1                          | 7.73                 | -0.159  | 0.59                     | 12.29                         | 0.3675 | 8.25                              | 0.31               | 7.437   | 8.037           | 8.213  | 8.458           | 9.215                   |         |
| ..OC402055 | KIJ5RSIcCoKec6KBxl | rs9608491  | 3.59                         | 3.44                 | -0.069  | 0.48                     | -8.86                         | 0.1834 | 8.222                             | 0.162              | 7.165   | 8.136           | 8.217  | 8.293           | 9.118                   | Yes     |
| ..OC402682 | l6up6QiuLkl.hvB19w | rs4729616  | 4.32                         | 4.13                 | -0.083  | 2.98                     | -23.78                        | 0.44   | 7.242                             | 0.081              | 7.115   | 7.18            | 7.224  | 7.277           | 7.591                   |         |
| ..OC402682 | l6up6QiuLkl.hvB19w | rs13232524 | 3.4                          | 3.26                 | -0.064  | 2.5                      | 25.52                         | 0.445  | 7.242                             | 0.081              | 7.115   | 7.18            | 7.224  | 7.277           | 7.591                   |         |
| ..OC440993 | BqVKOf3SdU17sfUT4  | rs2291652  | 10.24                        | 9.77                 | -0.201  | 3.24                     | 39.05                         | 0.42   | 8.103                             | 0.484              | 7.144   | 7.728           | 8.061  | 8.447           | 9.504                   |         |
| ..OC441046 | fn4CQqkEiC0nHp0pBI | rs1510881  | 26.23                        | 24.99                | -0.466  | 5.76                     | -41.54                        | 0.203  | 7.489                             | 0.201              | 7.119   | 7.36            | 7.442  | 7.599           | 8.139                   |         |
| ..OC441046 | fn4CQqkEiC0nHp0pBI | rs7698480  | 4.01                         | 3.84                 | 0.08    | 1.59                     | -27.12                        | 0.3923 | 7.489                             | 0.201              | 7.119   | 7.36            | 7.442  | 7.599           | 8.139                   |         |
| ..OC441046 | fn4CQqkEiC0nHp0pBI | rs924233   | 3.4                          | 3.25                 | 0.065   | 1.34                     | -0.61                         | 0.4075 | 7.489                             | 0.201              | 7.119   | 7.36            | 7.442  | 7.599           | 8.139                   |         |
| ..OC441046 | fn4CQqkEiC0nHp0pBI | rs2323187  | 3.72                         | 3.56                 | -0.072  | 1.34                     | 10.57                         | 0.41   | 7.489                             | 0.201              | 7.119   | 7.36            | 7.442  | 7.599           | 8.139                   |         |
| ..OC441046 | fn4CQqkEiC0nHp0pBI | rs17017927 | 24.17                        | 23.03                | -0.436  | 5.98                     | 18.59                         | 0.21   | 7.489                             | 0.201              | 7.119   | 7.36            | 7.442  | 7.599           | 8.139                   |         |
| ..OC441046 | fn4CQqkEiC0nHp0pBI | rs10032932 | 6.11                         | 5.84                 | 0.12    | 4.11                     | 25.94                         | 0.16   | 7.489                             | 0.201              | 7.119   | 7.36            | 7.442  | 7.599           | 8.139                   |         |
| ..OC441046 | fn4CQqkEiC0nHp0pBI | rs2132935  | 6.11                         | 5.84                 | -0.12   | 4.11                     | 33.27                         | 0.16   | 7.489                             | 0.201              | 7.119   | 7.36            | 7.442  | 7.599           | 8.139                   |         |
| LOC51057   | lkk4HqEd6lFLn80k4k | rs1517405  | 7.57                         | 7.23                 | -0.152  | 3.71                     | -24.81                        | 0.3325 | 7.328                             | 0.102              | 7.128   | 7.263           | 7.317  | 7.388           | 7.673                   |         |
| LOC51057   | lkk4HqEd6lFLn80k4k | rs6545986  | 7.75                         | 7.40                 | -0.156  | 3.72                     | -15.27                        | 0.3325 | 7.328                             | 0.102              | 7.128   | 7.263           | 7.317  | 7.388           | 7.673                   |         |
| LOC51057   | lkk4HqEd6lFLn80k4k | rs7585664  | 7.34                         | 7.01                 | -0.148  | 3.98                     | 8.33                          | 0.3182 | 7.328                             | 0.102              | 7.128   | 7.263           | 7.317  | 7.388           | 7.673                   |         |
| LOC51057   | lkk4HqEd6lFLn80k4k | rs1878507  | 4.83                         | 4.62                 | -0.095  | 3.49                     | 33.03                         | 0.4625 | 7.328                             | 0.102              | 7.128   | 7.263           | 7.317  | 7.388           | 7.673                   |         |
| LOC51057   | lkk4HqEd6lFLn80k4k | rs2421885  | 4.83                         | 4.62                 | 0.095   | 3.49                     | 36.66                         | 0.4625 | 7.328                             | 0.102              | 7.128   | 7.263           | 7.317  | 7.388           | 7.673                   |         |
| LOC51057   | lkk4HqEd6lFLn80k4k | rs13028443 | 4.44                         | 4.25                 | -0.086  | 3.37                     | 63.34                         | 0.4675 | 7.328                             | 0.102              | 7.128   | 7.263           | 7.317  | 7.388           | 7.673                   |         |
| LOC51057   | lkk4HqEd6lFLn80k4k | rs4671506  | 3.35                         | 3.21                 | -0.065  | 0.73                     | 104.65                        | 0.4242 | 7.328                             | 0.102              | 7.128   | 7.263           | 7.317  | 7.388           | 7.673                   |         |
| LOC51057   | lkk4HqEd6lFLn80k4k | rs959195   | 6.24                         | 5.96                 | 0.127   | 2.33                     | -11.49                        | 0.325  | 7.328                             | 0.102              | 7.128   | 7.263           | 7.317  | 7.388           | 7.673                   |         |
| LOC51057   | lkk4HqEd6lFLn80k4k | rs262494   | 5.65                         | 5.41                 | 0.113   | 1.6                      | 29.87                         | 0.28   | 7.328                             | 0.102              | 7.128   | 7.263           | 7.317  | 7.388           | 7.673                   |         |
| LOC51233   | Qq1Un_Veit0Nd3E940 | rs9680742  | 3.94                         | 3.77                 | -0.073  | 4.33                     | -7.77                         | 0.25   | 7.241                             | 0.108              | 7.11    | 7.157           | 7.216  | 7.289           | 7.801                   |         |

| Symbol   | Lumi nuID           | SNP        | Population-based association |                           |                      | Family-based association |                               |        | Transcript abundance (log2 scale) |                    |         |                 |        |                 | SNP mapping under probe |         |
|----------|---------------------|------------|------------------------------|---------------------------|----------------------|--------------------------|-------------------------------|--------|-----------------------------------|--------------------|---------|-----------------|--------|-----------------|-------------------------|---------|
|          |                     |            | p-value (-log10)             | p-value (-log10), GC adj. | % Variance Explained | p-value (-log10)         | Distance from transcript (kb) | MAF    | Mean                              | Standard Deviation | Minimum | 25th percentile | Median | 75th percentile |                         | Maximum |
| LOC51233 | Qq1Un_Veit0Nd3E94o  | rs12167140 | 4.03                         | 3.85                      | -0.075               | 4.44                     | -3.46                         | 0.2525 | 7.241                             | 0.108              | 7.11    | 7.157           | 7.216  | 7.289           | 7.801                   |         |
| LOC92270 | Z_U0Kqjh8UCVCHmXXU  | rs749401   | 17.97                        | 17.13                     | -0.342               | 6.37                     | -39.8                         | 0.2325 | 7.381                             | 0.162              | 7.135   | 7.26            | 7.349  | 7.48            | 8.226                   |         |
| LOC92270 | Z_U0Kqjh8UCVCHmXXU  | rs226201   | 12.28                        | 11.71                     | 0.243                | 4.37                     | -29.32                        | 0.3813 | 7.381                             | 0.162              | 7.135   | 7.26            | 7.349  | 7.48            | 8.226                   |         |
| LOC92270 | Z_U0Kqjh8UCVCHmXXU  | rs226206   | 18.86                        | 17.98                     | 0.358                | 7.12                     | -8.15                         | 0.28   | 7.381                             | 0.162              | 7.135   | 7.26            | 7.349  | 7.48            | 8.226                   |         |
| LOC92270 | Z_U0Kqjh8UCVCHmXXU  | rs226205   | 17.57                        | 16.74                     | -0.339               | 6.52                     | -7.51                         | 0.2312 | 7.381                             | 0.162              | 7.135   | 7.26            | 7.349  | 7.48            | 8.226                   |         |
| LOC92270 | Z_U0Kqjh8UCVCHmXXU  | rs2215128  | 5.92                         | 5.66                      | 0.119                | 2.13                     | -6.08                         | 0.3875 | 7.381                             | 0.162              | 7.135   | 7.26            | 7.349  | 7.48            | 8.226                   |         |
| LOC92270 | Z_U0Kqjh8UCVCHmXXU  | rs658912   | 8.58                         | 8.19                      | -0.17                | 3.51                     | -1.67                         | 0.335  | 7.381                             | 0.162              | 7.135   | 7.26            | 7.349  | 7.48            | 8.226                   |         |
| LOC92270 | Z_U0Kqjh8UCVCHmXXU  | rs224804   | 9.72                         | 9.27                      | -0.191               | 3.51                     | 3.91                          | 0.3925 | 7.381                             | 0.162              | 7.135   | 7.26            | 7.349  | 7.48            | 8.226                   |         |
| LOC92270 | Z_U0Kqjh8UCVCHmXXU  | rs1354123  | 11.36                        | 10.84                     | 0.227                | 4.53                     | 23.47                         | 0.355  | 7.381                             | 0.162              | 7.135   | 7.26            | 7.349  | 7.48            | 8.226                   |         |
| LOC92270 | Z_U0Kqjh8UCVCHmXXU  | rs7734188  | 11.79                        | 11.24                     | -0.235               | 5.15                     | 33.43                         | 0.35   | 7.381                             | 0.162              | 7.135   | 7.26            | 7.349  | 7.48            | 8.226                   |         |
| LOC92270 | Z_U0Kqjh8UCVCHmXXU  | rs10514238 | 11.78                        | 11.24                     | 0.234                | 4.52                     | 34.27                         | 0.2875 | 7.381                             | 0.162              | 7.135   | 7.26            | 7.349  | 7.48            | 8.226                   |         |
| LOC92270 | Z_U0Kqjh8UCVCHmXXU  | rs17247678 | 17.31                        | 16.50                     | -0.332               | 5.3                      | 38.63                         | 0.23   | 7.381                             | 0.162              | 7.135   | 7.26            | 7.349  | 7.48            | 8.226                   |         |
| LOC92270 | Z_U0Kqjh8UCVCHmXXU  | rs224816   | 8.58                         | 8.20                      | 0.174                | 2.92                     | 47.85                         | 0.4425 | 7.381                             | 0.162              | 7.135   | 7.26            | 7.349  | 7.48            | 8.226                   |         |
| LOC93622 | ZQnpTqrVAS09SnyOOE  | rs11946525 | 4.3                          | 4.22                      | -0.084               | 2.01                     | -2.17                         | 0.0575 | 9.722                             | 0.311              | 8.971   | 9.492           | 9.721  | 9.924           | 10.574                  |         |
| LOH3CR2A | 9Y3XrePX_rdw6AeQo   | rs9836284  | 3.36                         | 3.12                      | -0.056               | 1.44                     | -29.6                         | 0.4525 | 7.136                             | 0.049              | 7.1     | 7.115           | 7.124  | 7.141           | 7.666                   |         |
| LPAL2    | c3O.qDqAoxapCCKFHs  | rs4709432  | 3.44                         | 3.29                      | -0.065               | 2.9                      | -33.91                        | 0.15   | 7.216                             | 0.078              | 7.104   | 7.162           | 7.2    | 7.25            | 7.528                   | Yes     |
| LPAL2    | c3O.qDqAoxapCCKFHs  | rs3127602  | 4.73                         | 4.52                      | -0.089               | 2.3                      | 4.4                           | 0.2462 | 7.216                             | 0.078              | 7.104   | 7.162           | 7.2    | 7.25            | 7.528                   | Yes     |
| LPAL2    | c3O.qDqAoxapCCKFHs  | rs3123629  | 3.45                         | 3.31                      | 0.062                | 1.77                     | 18.25                         | 0.25   | 7.216                             | 0.078              | 7.104   | 7.162           | 7.2    | 7.25            | 7.528                   | Yes     |
| LPAR1    | Ef7_Kh281J36yUReQ4  | rs7873139  | 3.95                         | 3.78                      | 0.071                | 1.7                      | 38.6                          | 0.4325 | 7.401                             | 0.36               | 7.098   | 7.144           | 7.243  | 7.565           | 9.097                   |         |
| LPAR1    | Ef7_Kh281J36yUReQ4  | rs10817141 | 3.95                         | 3.78                      | 0.071                | 1.7                      | 41.03                         | 0.4325 | 7.401                             | 0.36               | 7.098   | 7.144           | 7.243  | 7.565           | 9.097                   |         |
| LPAR5    | 3VKk87Euf.PHuqlqS4  | rs1045553  | 3.73                         | 3.58                      | -0.068               | 1.16                     | 2.01                          | 0.1925 | 8.405                             | 0.394              | 7.552   | 8.134           | 8.375  | 8.645           | 9.339                   |         |
| LPCAT2   | QhBVdRZSwwL.SV4Ak4l | rs243840   | 3.83                         | 3.67                      | 0.071                | 0.39                     | -14.8                         | 0.17   | 7.253                             | 0.153              | 7.104   | 7.159           | 7.202  | 7.291           | 7.993                   |         |
| LRAP     | 9B_kndfTmPllbUCqSQ  | rs411135   | 6.27                         | 5.99                      | -0.124               | 2.32                     | -49.24                        | 0.44   | 10.631                            | 1.12               | 8.313   | 9.388           | 11.041 | 11.473          | 12.697                  |         |
| LRAP     | 9B_kndfTmPllbUCqSQ  | rs152468   | 3.8                          | 3.64                      | -0.074               | 2.83                     | -47.73                        | 0.1475 | 10.631                            | 1.12               | 8.313   | 9.388           | 11.041 | 11.473          | 12.697                  |         |
| LRAP     | 9B_kndfTmPllbUCqSQ  | rs10476692 | 3.43                         | 3.29                      | -0.065               | 0.31                     | -45.37                        | 0.0725 | 10.631                            | 1.12               | 8.313   | 9.388           | 11.041 | 11.473          | 12.697                  |         |
| LRAP     | 9B_kndfTmPllbUCqSQ  | rs845028   | 3.94                         | 3.78                      | -0.076               | 1.82                     | -45.05                        | 0.2125 | 10.631                            | 1.12               | 8.313   | 9.388           | 11.041 | 11.473          | 12.697                  |         |
| LRAP     | 9B_kndfTmPllbUCqSQ  | rs2042381  | 7.35                         | 7.02                      | 0.149                | 3.8                      | -26.6                         | 0.2889 | 10.631                            | 1.12               | 8.313   | 9.388           | 11.041 | 11.473          | 12.697                  |         |
| LRAP     | 9B_kndfTmPllbUCqSQ  | rs2911134  | 8.97                         | 8.57                      | 0.177                | 4.22                     | -11.91                        | 0.3575 | 10.631                            | 1.12               | 8.313   | 9.388           | 11.041 | 11.473          | 12.697                  |         |
| LRAP     | 9B_kndfTmPllbUCqSQ  | rs2549778  | 28.7                         | 27.33                     | 0.486                | 8.44                     | -11.01                        | 0.4025 | 10.631                            | 1.12               | 8.313   | 9.388           | 11.041 | 11.473          | 12.697                  |         |
| LRAP     | 9B_kndfTmPllbUCqSQ  | rs4092590  | 5.93                         | 5.67                      | 0.119                | 4.29                     | -10.97                        | 0.1675 | 10.631                            | 1.12               | 8.313   | 9.388           | 11.041 | 11.473          | 12.697                  |         |
| LRAP     | 9B_kndfTmPllbUCqSQ  | rs3733904  | 5.2                          | 4.98                      | -0.101               | 2.19                     | 0.9                           | 0.2387 | 10.631                            | 1.12               | 8.313   | 9.388           | 11.041 | 11.473          | 12.697                  |         |
| LRAP     | 9B_kndfTmPllbUCqSQ  | rs2549779  | 18.08                        | 17.24                     | -0.337               | 7.13                     | 1.12                          | 0.49   | 10.631                            | 1.12               | 8.313   | 9.388           | 11.041 | 11.473          | 12.697                  |         |
| LRAP     | 9B_kndfTmPllbUCqSQ  | rs4869315  | 27.88                        | 26.56                     | 0.479                | 11.57                    | 14                            | 0.44   | 10.631                            | 1.12               | 8.313   | 9.388           | 11.041 | 11.473          | 12.697                  |         |
| LRAP     | 9B_kndfTmPllbUCqSQ  | rs2549782  | 41.6                         | 39.61                     | -0.63                | 13.31                    | 15.73                         | 0.4924 | 10.631                            | 1.12               | 8.313   | 9.388           | 11.041 | 11.473          | 12.697                  |         |
| LRAP     | 9B_kndfTmPllbUCqSQ  | rs2161657  | 43.11                        | 41.04                     | -0.641               | 14.63                    | 17.54                         | 0.495  | 10.631                            | 1.12               | 8.313   | 9.388           | 11.041 | 11.473          | 12.697                  |         |
| LRAP     | 9B_kndfTmPllbUCqSQ  | rs2549796  | 41.47                        | 39.48                     | -0.627               | 14.29                    | -8.3                          | 0.49   | 10.631                            | 1.12               | 8.313   | 9.388           | 11.041 | 11.473          | 12.697                  |         |
| LRAP     | 9B_kndfTmPllbUCqSQ  | rs1981846  | 41.89                        | 39.88                     | -0.632               | 13.86                    | 15.22                         | 0.4899 | 10.631                            | 1.12               | 8.313   | 9.388           | 11.041 | 11.473          | 12.697                  |         |
| LRDD     | uUjPVS6OpIIVF9C3dQ  | rs10902222 | 3.53                         | 3.38                      | 0.069                | 1.51                     | 5.64                          | 0.3325 | 9.347                             | 0.388              | 8.408   | 9.079           | 9.343  | 9.591           | 10.711                  |         |
| LRFN2    | 3vxNSoS.bdXtDpdu1U  | rs4145198  | 7.75                         | 7.40                      | -0.147               | 5.83                     | -7.47                         | 0.265  | 7.141                             | 0.049              | 7.096   | 7.116           | 7.128  | 7.148           | 7.43                    |         |
| LRFN2    | 3vxNSoS.bdXtDpdu1U  | rs934465   | 4.34                         | 4.15                      | -0.082               | 3.13                     | 11.13                         | 0.39   | 7.141                             | 0.049              | 7.096   | 7.116           | 7.128  | 7.148           | 7.43                    |         |
| LRFN2    | 3vxNSoS.bdXtDpdu1U  | rs2033527  | 6.95                         | 6.64                      | -0.132               | 6.33                     | 20.96                         | 0.3    | 7.141                             | 0.049              | 7.096   | 7.116           | 7.128  | 7.148           | 7.43                    |         |
| LRFN2    | 3vxNSoS.bdXtDpdu1U  | rs6925172  | 4.52                         | 4.33                      | -0.086               | 3.25                     | 32.19                         | 0.145  | 7.141                             | 0.049              | 7.096   | 7.116           | 7.128  | 7.148           | 7.43                    |         |
| LRFN2    | 3vxNSoS.bdXtDpdu1U  | rs6931355  | 6.03                         | 5.76                      | 0.115                | 4.19                     | 35.1                          | 0.26   | 7.141                             | 0.049              | 7.096   | 7.116           | 7.128  | 7.148           | 7.43                    |         |
| LRFN2    | 3vxNSoS.bdXtDpdu1U  | rs6941669  | 4.1                          | 3.93                      | 0.077                | 4.65                     | 46.89                         | 0.2222 | 7.141                             | 0.049              | 7.096   | 7.116           | 7.128  | 7.148           | 7.43                    |         |
| LRIG1    | oghHieoegKElIfer3qw | rs9829376  | 3.52                         | 3.37                      | 0.066                | 1.09                     | -18.82                        | 0.4025 | 9.5                               | 0.476              | 8.194   | 9.12            | 9.53   | 9.88            | 10.595                  |         |
| LRIG1    | oghHieoegKElIfer3qw | rs7627907  | 4.08                         | 3.91                      | 0.078                | 1.3                      | -2.31                         | 0.365  | 9.5                               | 0.476              | 8.194   | 9.12            | 9.53   | 9.88            | 10.595                  |         |
| LRIG1    | oghHieoegKElIfer3qw | rs12633819 | 3.99                         | 3.82                      | 0.075                | 0.97                     | 19.09                         | 0.3575 | 9.5                               | 0.476              | 8.194   | 9.12            | 9.53   | 9.88            | 10.595                  |         |
| LRRC1    | fdMOLku0h7lx3jrO5Q  | rs9474647  | 5.72                         | 5.47                      | -0.114               | 3.47                     | -40.77                        | 0.17   | 7.993                             | 0.214              | 7.256   | 7.857           | 7.99   | 8.147           | 8.626                   |         |
| LRRC1    | fdMOLku0h7lx3jrO5Q  | rs4715423  | 4.05                         | 4.05                      | 0.084                | 2.53                     | -8.12                         | 0.4462 | 7.993                             | 0.214              | 7.256   | 7.857           | 7.99   | 8.147           | 8.626                   |         |
| LRRC1    | fdMOLku0h7lx3jrO5Q  | rs4342426  | 9.61                         | 9.17                      | 0.197                | 4.46                     | 5.41                          | 0.3825 | 7.993                             | 0.214              | 7.256   | 7.857           | 7.99   | 8.147           | 8.626                   |         |
| LRRC1    | fdMOLku0h7lx3jrO5Q  | rs4486000  | 6.6                          | 6.31                      | -0.133               | 4.47                     | 25.98                         | 0.24   | 7.993                             | 0.214              | 7.256   | 7.857           | 7.99   | 8.147           | 8.626                   |         |
| LRRC1    | fdMOLku0h7lx3jrO5Q  | rs3003489  | 4.61                         | 4.41                      | -0.092               | 2.07                     | 31.48                         | 0.1425 | 7.993                             | 0.214              | 7.256   | 7.857           | 7.99   | 8.147           | 8.626                   |         |
| LRRC1    | fdMOLku0h7lx3jrO5Q  | rs9370236  | 9.61                         | 9.17                      | -0.197               | 4.46                     | -64.57                        | 0.3825 | 7.993                             | 0.214              | 7.256   | 7.857           | 7.99   | 8.147           | 8.626                   |         |
| LRRC1    | fdMOLku0h7lx3jrO5Q  | rs6458972  | 4.58                         | 4.38                      | -0.091               | 2.26                     | -33.54                        | 0.145  | 7.993                             | 0.214              | 7.256   | 7.857           | 7.99   | 8.147           | 8.626                   |         |
| LRRC1    | fdMOLku0h7lx3jrO5Q  | rs1883632  | 10.84                        | 10.34                     | 0.216                | 5.31                     | -8.41                         | 0.425  | 7.993                             | 0.214              | 7.256   | 7.857           | 7.99   | 8.147           | 8.626                   |         |
| LRRC1    | fdMOLku0h7lx3jrO5Q  | rs9474687  | 7                            | 6.68                      | -0.141               | 5.31                     | 6.64                          | 0.235  | 7.993                             | 0.214              | 7.256   | 7.857           | 7.99   | 8.147           | 8.626                   |         |
| LRRC1    | fdMOLku0h7lx3jrO5Q  | rs10948787 | 7                            | 6.68                      | -0.141               | 5.52                     | 13.46                         | 0.235  | 7.993                             | 0.214              | 7.256   | 7.857           | 7.99   | 8.147           | 8.626                   |         |
| LRRC1    | fdMOLku0h7lx3jrO5Q  | rs11751301 | 7.14                         | 6.82                      | -0.143               | 5.73                     | 40.14                         | 0.2375 | 7.993                             | 0.214              | 7.256   | 7.857           | 7.99   | 8.147           | 8.626                   |         |
| LRRC14   | uBEr6SiLdptLYiUIID4 | rs1063739  | 3.73                         | 3.57                      | 0.068                | 1.7                      | -13.66                        | 0.4775 | 9.476                             | 0.359              | 8.584   | 9.244           | 9.464  | 9.721           | 10.639                  |         |
| LRRC14   | uBEr6SiLdptLYiUIID4 | rs3757966  | 3.54                         | 3.39                      | 0.064                | 1.43                     | 1.23                          | 0.475  | 9.476                             | 0.359              | 8.584   | 9.244           | 9.464  | 9.721           | 10.639                  |         |
| LRRC16   | HkxTQYkSciEi4IKVOK  | rs7764258  | 3.63                         | 3.48                      | -0.069               | 1.5                      | 43.04                         | 0.1859 | 7.461                             | 0.201              | 7.125   | 7.317           | 7.433  | 7.573           | 8.428                   |         |
| LRRC16   | HkxTQYkSciEi4IKVOK  | rs1983578  | 4.05                         | 3.87                      | 0.078                | 1.72                     | 57.7                          | 0.3975 | 7.461                             | 0.201              | 7.125   | 7.317           | 7.433  | 7.573           | 8.428                   |         |

| Symbol | Lumi nuID          | SNP        | Population-based association |                           | % Variance Explained | Family-based association |                               | Transcript abundance (log2 scale) |        |                    |         |                 |        |                 | SNP mapping under probe |
|--------|--------------------|------------|------------------------------|---------------------------|----------------------|--------------------------|-------------------------------|-----------------------------------|--------|--------------------|---------|-----------------|--------|-----------------|-------------------------|
|        |                    |            | p-value (-log10)             | p-value (-log10), GC adj. |                      | p-value (-log10)         | Distance from transcript (kb) | MAF                               | Mean   | Standard Deviation | Minimum | 25th percentile | Median | 75th percentile |                         |
| LRRC16 | HkxTQYkScIEi4IKVOK | rs1983579  | 3.71                         | 3.55                      | 0.07                 | 1.63                     | 57.86                         | 0.405                             | 7.461  | 0.201              | 7.125   | 7.317           | 7.433  | 7.573           | 8.428                   |
| LRRC16 | HkxTQYkScIEi4IKVOK | rs2206194  | 4.84                         | 4.63                      | 0.094                | 2.4                      | 60.7                          | 0.4825                            | 7.461  | 0.201              | 7.125   | 7.317           | 7.433  | 7.573           | 8.428                   |
| LRRC16 | HkxTQYkScIEi4IKVOK | rs2744229  | 3.5                          | 3.35                      | -0.066               | 1.54                     | 61.8                          | 0.395                             | 7.461  | 0.201              | 7.125   | 7.317           | 7.433  | 7.573           | 8.428                   |
| LRRC16 | HkxTQYkScIEi4IKVOK | rs11759658 | 5.44                         | 5.21                      | -0.107               | 2.93                     | 79.77                         | 0.3417                            | 7.461  | 0.201              | 7.125   | 7.317           | 7.433  | 7.573           | 8.428                   |
| LRRC16 | HkxTQYkScIEi4IKVOK | rs716797   | 4.03                         | 3.86                      | 0.078                | 1.25                     | 113.53                        | 0.4623                            | 7.461  | 0.201              | 7.125   | 7.317           | 7.433  | 7.573           | 8.428                   |
| LRRC16 | HkxTQYkScIEi4IKVOK | rs17317669 | 6.22                         | 5.95                      | -0.121               | 2.92                     | 126.25                        | 0.2975                            | 7.461  | 0.201              | 7.125   | 7.317           | 7.433  | 7.573           | 8.428                   |
| LRRC16 | HkxTQYkScIEi4IKVOK | rs4368803  | 4.08                         | 3.91                      | 0.078                | 3.16                     | 130.3                         | 0.3175                            | 7.461  | 0.201              | 7.125   | 7.317           | 7.433  | 7.573           | 8.428                   |
| LRRC16 | HkxTQYkScIEi4IKVOK | rs9358854  | 5.05                         | 4.83                      | -0.098               | 3.5                      | 131.69                        | 0.3125                            | 7.461  | 0.201              | 7.125   | 7.317           | 7.433  | 7.573           | 8.428                   |
| LRRC23 | Z6yi6_ilmCmnu9o8   | rs2238114  | 11.38                        | 10.86                     | -0.225               | 4.5                      | -48.21                        | 0.3141                            | 8.539  | 0.34               | 7.598   | 8.301           | 8.487  | 8.736           | 9.636                   |
| LRRC23 | Km4XoFYETPjckkvcl0 | rs2238114  | 5.21                         | 4.98                      | -0.106               | 1.71                     | -48.21                        | 0.3141                            | 7.312  | 0.106              | 7.104   | 7.231           | 7.305  | 7.376           | 7.648                   |
| LRRC23 | Z6yi6_ilmCmnu9o8   | rs2040352  | 14.9                         | 14.21                     | -0.291               | 4.28                     | -6.95                         | 0.28                              | 8.539  | 0.34               | 7.598   | 8.301           | 8.487  | 8.736           | 9.636                   |
| LRRC23 | Km4XoFYETPjckkvcl0 | rs2040352  | 7.83                         | 7.48                      | -0.163               | 1.79                     | -6.95                         | 0.28                              | 7.312  | 0.106              | 7.104   | 7.231           | 7.305  | 7.376           | 7.648                   |
| LRRC23 | Z6yi6_ilmCmnu9o8   | rs2301137  | 14.98                        | 14.28                     | 0.291                | 4.22                     | -4.46                         | 0.275                             | 8.539  | 0.34               | 7.598   | 8.301           | 8.487  | 8.736           | 9.636                   |
| LRRC23 | Km4XoFYETPjckkvcl0 | rs2301137  | 7.46                         | 7.13                      | 0.155                | 1.18                     | -4.46                         | 0.275                             | 7.312  | 0.106              | 7.104   | 7.231           | 7.305  | 7.376           | 7.648                   |
| LRRC23 | Z6yi6_ilmCmnu9o8   | rs710415   | 13.94                        | 13.30                     | 0.27                 | 3.99                     | -0.28                         | 0.285                             | 8.539  | 0.34               | 7.598   | 8.301           | 8.487  | 8.736           | 9.636                   |
| LRRC23 | Km4XoFYETPjckkvcl0 | rs710415   | 6.56                         | 6.27                      | 0.134                | 0.9                      | -0.28                         | 0.285                             | 7.312  | 0.106              | 7.104   | 7.231           | 7.305  | 7.376           | 7.648                   |
| LRRC23 | Z6yi6_ilmCmnu9o8   | rs7303722  | 7.39                         | 7.06                      | -0.149               | 3.24                     | 10.42                         | 0.2412                            | 8.539  | 0.34               | 7.598   | 8.301           | 8.487  | 8.736           | 9.636                   |
| LRRC23 | Km4XoFYETPjckkvcl0 | rs7303722  | 4.09                         | 3.91                      | -0.082               | 1.21                     | 10.42                         | 0.2412                            | 7.312  | 0.106              | 7.104   | 7.231           | 7.305  | 7.376           | 7.648                   |
| LRRC23 | Z6yi6_ilmCmnu9o8   | rs1044189  | 8.98                         | 8.57                      | 0.176                | 2.84                     | 29.74                         | 0.3075                            | 8.539  | 0.34               | 7.598   | 8.301           | 8.487  | 8.736           | 9.636                   |
| LRRC23 | Km4XoFYETPjckkvcl0 | rs1044189  | 5.84                         | 5.58                      | 0.117                | 1.39                     | 29.74                         | 0.3075                            | 7.312  | 0.106              | 7.104   | 7.231           | 7.305  | 7.376           | 7.648                   |
| LRRC3  | BVoseqPjv0KUNDqOYF | rs743491   | 3.66                         | 3.51                      | 0.071                | 0.58                     | -6.03                         | 0.1425                            | 7.181  | 0.046              | 7.11    | 7.151           | 7.173  | 7.207           | 7.373                   |
| LRRC3  | BVoseqPjv0KUNDqOYF | rs2838572  | 3.55                         | 3.40                      | -0.069               | 2.24                     | 23.58                         | 0.465                             | 7.181  | 0.046              | 7.11    | 7.151           | 7.173  | 7.207           | 7.373                   |
| LRRC45 | TXmZpqv6AxJm.kf7jA | rs9912335  | 4.36                         | 4.17                      | 0.084                | 1.51                     | -21.62                        | 0.32                              | 9.171  | 0.301              | 8.283   | 8.963           | 9.183  | 9.358           | 10.411                  |
| LRRC56 | ldd_mShlWgVAUE.Unc | rs7930593  | 3.46                         | 3.31                      | 0.065                | 2.86                     | -35.51                        | 0.355                             | 7.954  | 0.224              | 7.332   | 7.813           | 7.971  | 8.095           | 8.493                   |
| LRRC56 | ldd_mShlWgVAUE.Unc | rs12420868 | 6.54                         | 6.25                      | -0.126               | 1.98                     | -25.72                        | 0.1775                            | 7.954  | 0.224              | 7.332   | 7.813           | 7.971  | 8.095           | 8.493                   |
| LRRC6  | 0FC4oIVBf4IQV4L1k  | rs4480107  | 5.59                         | 5.34                      | 0.118                | 2.33                     | 45.17                         | 0.495                             | 7.457  | 0.141              | 7.161   | 7.362           | 7.45   | 7.55            | 7.919                   |
| LRRC6  | 0FC4oIVBf4IQV4L1k  | rs6471091  | 12.46                        | 11.89                     | 0.257                | 5.09                     | 10.2                          | 0.4874                            | 7.457  | 0.141              | 7.161   | 7.362           | 7.45   | 7.55            | 7.919                   |
| LRRC6  | 0FC4oIVBf4IQV4L1k  | rs10097529 | 5.59                         | 5.35                      | 0.114                | 4.66                     | 16.9                          | 0.165                             | 7.457  | 0.141              | 7.161   | 7.362           | 7.45   | 7.55            | 7.919                   |
| LRRC6  | 0FC4oIVBf4IQV4L1k  | rs4736424  | 3.29                         | 3.15                      | 0.065                | 0.58                     | 25.3                          | 0.325                             | 7.457  | 0.141              | 7.161   | 7.362           | 7.45   | 7.55            | 7.919                   |
| LRRC6  | 0FC4oIVBf4IQV4L1k  | rs3843561  | 5.58                         | 5.33                      | -0.112               | 2.03                     | 26.67                         | 0.2136                            | 7.457  | 0.141              | 7.161   | 7.362           | 7.45   | 7.55            | 7.919                   |
| LRRC6  | 0FC4oIVBf4IQV4L1k  | rs2280871  | 10.36                        | 9.88                      | -0.209               | 5.64                     | 34.86                         | 0.1575                            | 7.457  | 0.141              | 7.161   | 7.362           | 7.45   | 7.55            | 7.919                   |
| LRRC6  | 0FC4oIVBf4IQV4L1k  | rs10110952 | 14.53                        | 13.85                     | -0.3                 | 4.6                      | 37.91                         | 0.4975                            | 7.457  | 0.141              | 7.161   | 7.362           | 7.45   | 7.55            | 7.919                   |
| LRRC6  | 0FC4oIVBf4IQV4L1k  | rs1593398  | 4.59                         | 4.39                      | -0.095               | 0.6                      | 38.81                         | 0.3725                            | 7.457  | 0.141              | 7.161   | 7.362           | 7.45   | 7.55            | 7.919                   |
| LRRC6  | 0FC4oIVBf4IQV4L1k  | rs7011665  | 14.49                        | 13.82                     | 0.296                | 4.82                     | 41.17                         | 0.4975                            | 7.457  | 0.141              | 7.161   | 7.362           | 7.45   | 7.55            | 7.919                   |
| LRRC6  | 0FC4oIVBf4IQV4L1k  | rs2052701  | 3.5                          | 3.35                      | 0.069                | 0.48                     | 43.98                         | 0.35                              | 7.457  | 0.141              | 7.161   | 7.362           | 7.45   | 7.55            | 7.919                   |
| LRRC6  | 0FC4oIVBf4IQV4L1k  | rs10283307 | 9.49                         | 9.05                      | -0.195               | 4.19                     | 49.99                         | 0.1475                            | 7.457  | 0.141              | 7.161   | 7.362           | 7.45   | 7.55            | 7.919                   |
| LRRC8C | H4DXV14Hq4e2p3gmJ4 | rs1215494  | 4.11                         | 3.93                      | 0.074                | 1.08                     | -31.96                        | 0.3675                            | 10.502 | 0.359              | 9.062   | 10.284          | 10.538 | 10.747          | 11.325                  |
| LRRC8C | H4DXV14Hq4e2p3gmJ4 | rs10493823 | 6.27                         | 6.00                      | 0.118                | 3.09                     | -31.41                        | 0.4825                            | 10.502 | 0.359              | 9.062   | 10.284          | 10.538 | 10.747          | 11.325                  |
| LRRC8C | H4DXV14Hq4e2p3gmJ4 | rs1885745  | 4.54                         | 4.35                      | 0.086                | 1.39                     | -29.12                        | 0.39                              | 10.502 | 0.359              | 9.062   | 10.284          | 10.538 | 10.747          | 11.325                  |
| LRRC8C | H4DXV14Hq4e2p3gmJ4 | rs1215512  | 5.61                         | 5.36                      | 0.105                | 1.82                     | -11.25                        | 0.4325                            | 10.502 | 0.359              | 9.062   | 10.284          | 10.538 | 10.747          | 11.325                  |
| LRRC8C | H4DXV14Hq4e2p3gmJ4 | rs6428561  | 3.67                         | 3.51                      | 0.066                | 1.62                     | 3.86                          | 0.4825                            | 10.502 | 0.359              | 9.062   | 10.284          | 10.538 | 10.747          | 11.325                  |
| LRRC8C | H4DXV14Hq4e2p3gmJ4 | rs10493829 | 3.87                         | 3.71                      | 0.07                 | 1.77                     | 19.07                         | 0.485                             | 10.502 | 0.359              | 9.062   | 10.284          | 10.538 | 10.747          | 11.325                  |
| LRRC8C | H4DXV14Hq4e2p3gmJ4 | rs10922690 | 9.87                         | 9.42                      | -0.191               | 2.73                     | 33.31                         | 0.3618                            | 10.502 | 0.359              | 9.062   | 10.284          | 10.538 | 10.747          | 11.325                  |
| LRRC8C | H4DXV14Hq4e2p3gmJ4 | rs6693717  | 9.95                         | 9.49                      | -0.191               | 2.72                     | 33.72                         | 0.36                              | 10.502 | 0.359              | 9.062   | 10.284          | 10.538 | 10.747          | 11.325                  |
| LRRC8C | H4DXV14Hq4e2p3gmJ4 | rs2185196  | 9.73                         | 9.29                      | -0.187               | 2.52                     | 33.82                         | 0.3625                            | 10.502 | 0.359              | 9.062   | 10.284          | 10.538 | 10.747          | 11.325                  |
| LRRC8C | H4DXV14Hq4e2p3gmJ4 | rs4658309  | 9.73                         | 9.29                      | 0.187                | 2.63                     | -37.35                        | 0.3625                            | 10.502 | 0.359              | 9.062   | 10.284          | 10.538 | 10.747          | 11.325                  |
| LRRC8C | H4DXV14Hq4e2p3gmJ4 | rs1343779  | 15.72                        | 14.99                     | -0.292               | 3.19                     | -21.86                        | 0.3575                            | 10.502 | 0.359              | 9.062   | 10.284          | 10.538 | 10.747          | 11.325                  |
| LRRC8C | H4DXV14Hq4e2p3gmJ4 | rs4593805  | 15.25                        | 14.54                     | -0.286               | 2.95                     | -16.5                         | 0.3568                            | 10.502 | 0.359              | 9.062   | 10.284          | 10.538 | 10.747          | 11.325                  |
| LRRC8C | H4DXV14Hq4e2p3gmJ4 | rs7548762  | 3.92                         | 3.76                      | 0.073                | 1.15                     | 18.03                         | 0.185                             | 10.502 | 0.359              | 9.062   | 10.284          | 10.538 | 10.747          | 11.325                  |
| LRRC8C | H4DXV14Hq4e2p3gmJ4 | rs2146338  | 5.35                         | 5.35                      | -0.101               | 1.37                     | 40.55                         | 0.4774                            | 10.502 | 0.359              | 9.062   | 10.284          | 10.538 | 10.747          | 11.325                  |
| LRRC8C | H4DXV14Hq4e2p3gmJ4 | rs473412   | 5.64                         | 5.19                      | -0.107               | 1.34                     | 47.07                         | 0.4725                            | 10.502 | 0.359              | 9.062   | 10.284          | 10.538 | 10.747          | 11.325                  |
| LRRC8D | Imp__6CNF__MV5R2C0 | rs4658340  | 3.93                         | 3.76                      | 0.076                | 2.54                     | 40.04                         | 0.295                             | 10.346 | 0.246              | 8.592   | 10.245          | 10.357 | 10.474          | 10.887                  |
| LRRC8D | Imp__6CNF__MV5R2C0 | rs2802031  | 3.93                         | 3.76                      | 0.076                | 2.54                     | 52.16                         | 0.295                             | 10.346 | 0.246              | 8.592   | 10.245          | 10.357 | 10.474          | 10.887                  |
| LRRC8D | Imp__6CNF__MV5R2C0 | rs2802028  | 3.42                         | 3.27                      | 0.066                | 2.16                     | -38.95                        | 0.3225                            | 10.346 | 0.246              | 8.592   | 10.245          | 10.357 | 10.474          | 10.887                  |
| LRRC8D | Imp__6CNF__MV5R2C0 | rs1078513  | 3.56                         | 3.41                      | -0.066               | 0.76                     | -7.77                         | 0.1425                            | 7.248  | 0.159              | 7.103   | 7.146           | 7.188  | 7.301           | 8.134                   |
| LSM8   | inLn3AL51ckelrurKw | rs979652   | 8.05                         | 7.69                      | 0.161                | 2.87                     | 4.97                          | 0.3475                            | 8.38   | 0.246              | 7.719   | 8.218           | 8.388  | 8.557           | 8.874                   |
| LSM8   | inLn3AL51ckelrurKw | rs10487390 | 8.05                         | 7.69                      | 0.161                | 2.88                     | 15.5                          | 0.3475                            | 8.38   | 0.246              | 7.719   | 8.218           | 8.388  | 8.557           | 8.874                   |
| LSM8   | inLn3AL51ckelrurKw | rs11486992 | 8.03                         | 7.67                      | 0.163                | 2.31                     | 17.13                         | 0.3485                            | 8.38   | 0.246              | 7.719   | 8.218           | 8.388  | 8.557           | 8.874                   |
| LSM8   | inLn3AL51ckelrurKw | rs17141053 | 6.39                         | 6.11                      | -0.129               | 2.69                     | 21.59                         | 0.49                              | 8.38   | 0.246              | 7.719   | 8.218           | 8.388  | 8.557           | 8.874                   |
| LSM8   | inLn3AL51ckelrurKw | rs2058418  | 5.39                         | 5.15                      | -0.107               | 2.92                     | 23.41                         | 0.4548                            | 8.38   | 0.246              | 7.719   | 8.218           | 8.388  | 8.557           | 8.874                   |
| LSM8   | inLn3AL51ckelrurKw | rs917761   | 8.69                         | 8.29                      | -0.174               | 3.15                     | 26.17                         | 0.3775                            | 8.38   | 0.246              | 7.719   | 8.218           | 8.388  | 8.557           | 8.874                   |
| LSM8   | inLn3AL51ckelrurKw | rs769435   | 5.3                          | 5.07                      | -0.104               | 3.08                     | 29.36                         | 0.455                             | 8.38   | 0.246              | 7.719   | 8.218           | 8.388  | 8.557           | 8.874                   |

| Symbol  | Lumi nuID          | SNP        | Population-based | Population-based          | % Variance | Family-based     | Distance from | MAF    | Mean      | Transcript abundance (log2 scale) |            |            |            |        | SNP mapping under probe |      |
|---------|--------------------|------------|------------------|---------------------------|------------|------------------|---------------|--------|-----------|-----------------------------------|------------|------------|------------|--------|-------------------------|------|
|         |                    |            | association      | association               |            | association      |               |        |           | transcript (kb)                   | Standard   | Minimum    | 25th       | Median |                         | 75th |
|         |                    |            | p-value (-log10) | p-value (-log10), GC adj. | Explained  | p-value (-log10) |               |        | Deviation |                                   | percentile | percentile | percentile |        |                         |      |
| LSM8    | inLn3AL51ckelrurKw | rs2286865  | 6.24             | 5.96                      | -0.125     | 2.91             | 31.76         | 0.5    | 8.38      | 0.246                             | 7.719      | 8.218      | 8.388      | 8.557  | 8.874                   |      |
| LSS     | 65Kn60nl70u0EFV5E0 | rs2075906  | 4.85             | 4.64                      | 0.092      | 4.5              | 16.5          | 0.165  | 8.903     | 0.404                             | 8.026      | 8.618      | 8.889      | 9.139  | 10.03                   |      |
| LSS     | 65Kn60nl70u0EFV5E0 | rs2839156  | 4.16             | 3.98                      | 0.077      | 4.49             | -7.5          | 0.16   | 8.903     | 0.404                             | 8.026      | 8.618      | 8.889      | 9.139  | 10.03                   |      |
| LSS     | VW4TnfhAoRRQiiOkns | rs16979001 | 5.75             | 5.50                      | -0.108     | 3.23             | 5.61          | 0.055  | 7.745     | 0.254                             | 7.267      | 7.57       | 7.738      | 7.879  | 9.614                   |      |
| LSS     | 65Kn60nl70u0EFV5E0 | rs2839168  | 3.81             | 3.65                      | -0.072     | 1.44             | 12.92         | 0.415  | 8.903     | 0.404                             | 8.026      | 8.618      | 8.889      | 9.139  | 10.03                   |      |
| LSS     | 65Kn60nl70u0EFV5E0 | rs2839182  | 4.13             | 3.95                      | 0.077      | 4.68             | 37.46         | 0.16   | 8.903     | 0.404                             | 8.026      | 8.618      | 8.889      | 9.139  | 10.03                   |      |
| LXN     | fiPPV6QQQvd6TUQxpE | rs7624934  | 3.36             | 3.21                      | 0.063      | 0.94             | -0.71         | 0.425  | 8.917     | 0.269                             | 7.319      | 8.792      | 8.957      | 9.098  | 9.46                    |      |
| LXN     | fiPPV6QQQvd6TUQxpE | rs9842500  | 3.36             | 3.21                      | 0.063      | 0.94             | 7.8           | 0.425  | 8.917     | 0.269                             | 7.319      | 8.792      | 8.957      | 9.098  | 9.46                    |      |
| LXN     | fiPPV6QQQvd6TUQxpE | rs17699324 | 4.3              | 4.11                      | -0.084     | 1.42             | 34.08         | 0.285  | 8.917     | 0.269                             | 7.319      | 8.792      | 8.957      | 9.098  | 9.46                    |      |
| LXN     | fiPPV6QQQvd6TUQxpE | rs2307064  | 3.74             | 3.58                      | -0.072     | 1.35             | 38.16         | 0.2925 | 8.917     | 0.269                             | 7.319      | 8.792      | 8.957      | 9.098  | 9.46                    |      |
| LY6G5C  | 6fr4ZX0kR8ecd7FVJU | rs2242660  | 8.33             | 7.95                      | 0.16       | 3.9              | -46.71        | 0.3813 | 7.922     | 0.188                             | 7.166      | 7.793      | 7.916      | 8.034  | 8.562                   |      |
| LY6G5C  | 6fr4ZX0kR8ecd7FVJU | rs1046089  | 6.62             | 6.33                      | 0.129      | 3.77             | -41.49        | 0.35   | 7.922     | 0.188                             | 7.166      | 7.793      | 7.916      | 8.034  | 8.562                   |      |
| LY6G5C  | 6fr4ZX0kR8ecd7FVJU | rs1077394  | 5.2              | 4.97                      | 0.099      | 1.54             | -34.08        | 0.35   | 7.922     | 0.188                             | 7.166      | 7.793      | 7.916      | 8.034  | 8.562                   |      |
| LY6G5C  | 6fr4ZX0kR8ecd7FVJU | rs1077393  | 8.24             | 7.87                      | 0.161      | 2.55             | -33.93        | 0.4774 | 7.922     | 0.188                             | 7.166      | 7.793      | 7.916      | 8.034  | 8.562                   |      |
| LY6G5C  | 6fr4ZX0kR8ecd7FVJU | rs1052486  | 8.21             | 7.84                      | 0.16       | 2.39             | -33.77        | 0.4774 | 7.922     | 0.188                             | 7.166      | 7.793      | 7.916      | 8.034  | 8.562                   |      |
| LY6G5C  | 6fr4ZX0kR8ecd7FVJU | rs2844463  | 3.9              | 3.74                      | 0.07       | 2.47             | -29.29        | 0.135  | 7.922     | 0.188                             | 7.166      | 7.793      | 7.916      | 8.034  | 8.562                   |      |
| LY6G5C  | 6fr4ZX0kR8ecd7FVJU | rs805303   | 8.02             | 7.66                      | 0.152      | 4.45             | -28.09        | 0.37   | 7.922     | 0.188                             | 7.166      | 7.793      | 7.916      | 8.034  | 8.562                   |      |
| LY6G5C  | 6fr4ZX0kR8ecd7FVJU | rs805262   | 6.48             | 6.19                      | 0.124      | 1.96             | -15.73        | 0.45   | 7.922     | 0.188                             | 7.166      | 7.793      | 7.916      | 8.034  | 8.562                   |      |
| LY6G5C  | 6fr4ZX0kR8ecd7FVJU | rs2280800  | 4.57             | 4.38                      | 0.086      | 4.1              | -1.74         | 0.15   | 7.922     | 0.188                             | 7.166      | 7.793      | 7.916      | 8.034  | 8.562                   |      |
| LY6G5C  | 6fr4ZX0kR8ecd7FVJU | rs805274   | 9.84             | 9.39                      | 0.186      | 6.11             | 17.05         | 0.2875 | 7.922     | 0.188                             | 7.166      | 7.793      | 7.916      | 8.034  | 8.562                   |      |
| LY6G5C  | rogFRIRQu3qxF7Uo50 | rs805274   | 3.63             | 3.47                      | 0.069      | 4.03             | 17.05         | 0.2875 | 7.161     | 0.037                             | 7.102      | 7.132      | 7.153      | 7.18   | 7.274                   |      |
| LY6G5C  | 6fr4ZX0kR8ecd7FVJU | rs9267546  | 4.89             | 4.68                      | 0.091      | 2.47             | 25.3          | 0.1091 | 7.922     | 0.188                             | 7.166      | 7.793      | 7.916      | 8.034  | 8.562                   |      |
| LY6G5C  | 6fr4ZX0kR8ecd7FVJU | rs2242653  | 3.48             | 3.33                      | 0.063      | 2.57             | 27.62         | 0.1625 | 7.922     | 0.188                             | 7.166      | 7.793      | 7.916      | 8.034  | 8.562                   |      |
| LY6G5C  | 6fr4ZX0kR8ecd7FVJU | rs805286   | 6.77             | 6.47                      | -0.131     | 4.98             | 31.17         | 0.2764 | 7.922     | 0.188                             | 7.166      | 7.793      | 7.916      | 8.034  | 8.562                   |      |
| LY6G5C  | 6fr4ZX0kR8ecd7FVJU | rs385306   | 5.44             | 5.20                      | 0.104      | 3                | 33.02         | 0.2372 | 7.922     | 0.188                             | 7.166      | 7.793      | 7.916      | 8.034  | 8.562                   |      |
| LY6G5C  | 6fr4ZX0kR8ecd7FVJU | rs1065356  | 5.85             | 5.59                      | 0.109      | 4.06             | 38.87         | 0.23   | 7.922     | 0.188                             | 7.166      | 7.793      | 7.916      | 8.034  | 8.562                   |      |
| LY6G5C  | 6fr4ZX0kR8ecd7FVJU | rs805294   | 5.17             | 4.95                      | -0.096     | 3.25             | 40.08         | 0.3475 | 7.922     | 0.188                             | 7.166      | 7.793      | 7.916      | 8.034  | 8.562                   |      |
| LYCAT   | 6dwbogOJ9OeKy6_Xyl | rs2076932  | 14.68            | 14.00                     | 0.29       | 4.79             | -33.22        | 0.42   | 9.218     | 0.502                             | 7.171      | 8.854      | 9.189      | 9.504  | 10.707                  | Yes  |
| LYCAT   | 6dwbogOJ9OeKy6_Xyl | rs829597   | 4.15             | 3.97                      | 0.083      | 1.13             | -31.66        | 0.1275 | 9.218     | 0.502                             | 7.171      | 8.854      | 9.189      | 9.504  | 10.707                  | Yes  |
| LYCAT   | 6dwbogOJ9OeKy6_Xyl | rs829699   | 6.08             | 5.81                      | -0.123     | 2.98             | -26.33        | 0.4475 | 9.218     | 0.502                             | 7.171      | 8.854      | 9.189      | 9.504  | 10.707                  | Yes  |
| LYCAT   | 6dwbogOJ9OeKy6_Xyl | rs711237   | 7.54             | 7.20                      | 0.154      | 3.2              | -20.92        | 0.3    | 9.218     | 0.502                             | 7.171      | 8.854      | 9.189      | 9.504  | 10.707                  | Yes  |
| LYCAT   | 6dwbogOJ9OeKy6_Xyl | rs829697   | 7.01             | 6.69                      | -0.148     | 2.13             | -17.68        | 0.0955 | 9.218     | 0.502                             | 7.171      | 8.854      | 9.189      | 9.504  | 10.707                  | Yes  |
| LYCAT   | 6dwbogOJ9OeKy6_Xyl | rs6727836  | 5.6              | 5.35                      | 0.112      | 2.4              | -15.82        | 0.3325 | 9.218     | 0.502                             | 7.171      | 8.854      | 9.189      | 9.504  | 10.707                  | Yes  |
| LYCAT   | 6dwbogOJ9OeKy6_Xyl | rs1662955  | 25.89            | 24.66                     | -0.475     | 6.97             | 0.84          | 0.2175 | 9.218     | 0.502                             | 7.171      | 8.854      | 9.189      | 9.504  | 10.707                  | Yes  |
| LYCAT   | 6dwbogOJ9OeKy6_Xyl | rs1612616  | 25.89            | 24.66                     | 0.475      | 6.98             | 6.29          | 0.2175 | 9.218     | 0.502                             | 7.171      | 8.854      | 9.189      | 9.504  | 10.707                  | Yes  |
| LYCAT   | 6dwbogOJ9OeKy6_Xyl | rs711241   | 7.31             | 6.98                      | 0.153      | 1.9              | 31.59         | 0.1025 | 9.218     | 0.502                             | 7.171      | 8.854      | 9.189      | 9.504  | 10.707                  | Yes  |
| LYCAT   | 6dwbogOJ9OeKy6_Xyl | rs1723167  | 25.23            | 24.03                     | -0.464     | 7.05             | 44.51         | 0.215  | 9.218     | 0.502                             | 7.171      | 8.854      | 9.189      | 9.504  | 10.707                  | Yes  |
| LYCAT   | 6dwbogOJ9OeKy6_Xyl | rs1880540  | 8.43             | 8.05                      | -0.173     | 4.13             | 51.37         | 0.4475 | 9.218     | 0.502                             | 7.171      | 8.854      | 9.189      | 9.504  | 10.707                  | Yes  |
| LYCAT   | 6dwbogOJ9OeKy6_Xyl | rs1252627  | 7.31             | 6.98                      | -0.153     | 1.9              | 80.34         | 0.1025 | 9.218     | 0.502                             | 7.171      | 8.854      | 9.189      | 9.504  | 10.707                  | Yes  |
| LYCAT   | 6dwbogOJ9OeKy6_Xyl | rs10495776 | 6.9              | 6.59                      | -0.141     | 2.27             | 97.39         | 0.2889 | 9.218     | 0.502                             | 7.171      | 8.854      | 9.189      | 9.504  | 10.707                  | Yes  |
| LYCAT   | 6dwbogOJ9OeKy6_Xyl | rs11692096 | 7.31             | 6.98                      | -0.153     | 2.37             | -97.99        | 0.1025 | 9.218     | 0.502                             | 7.171      | 8.854      | 9.189      | 9.504  | 10.707                  | Yes  |
| LYCAT   | 6dwbogOJ9OeKy6_Xyl | rs6712951  | 5.9              | 5.64                      | -0.118     | 1.89             | -96.36        | 0.3075 | 9.218     | 0.502                             | 7.171      | 8.854      | 9.189      | 9.504  | 10.707                  | Yes  |
| LYCAT   | 6dwbogOJ9OeKy6_Xyl | rs10203381 | 5.61             | 5.36                      | 0.113      | 2.22             | -92.1         | 0.28   | 9.218     | 0.502                             | 7.171      | 8.854      | 9.189      | 9.504  | 10.707                  | Yes  |
| LYCAT   | 6dwbogOJ9OeKy6_Xyl | rs12621663 | 4.55             | 4.36                      | 0.09       | 1.81             | -82.55        | 0.3125 | 9.218     | 0.502                             | 7.171      | 8.854      | 9.189      | 9.504  | 10.707                  | Yes  |
| LYCAT   | 6dwbogOJ9OeKy6_Xyl | rs4952151  | 16.43            | 15.66                     | 0.331      | 5.83             | -70.42        | 0.1231 | 9.218     | 0.502                             | 7.171      | 8.854      | 9.189      | 9.504  | 10.707                  | Yes  |
| LYCAT   | 6dwbogOJ9OeKy6_Xyl | rs2363851  | 15.58            | 14.86                     | 0.31       | 5.27             | -61.46        | 0.115  | 9.218     | 0.502                             | 7.171      | 8.854      | 9.189      | 9.504  | 10.707                  | Yes  |
| LYCAT   | 6dwbogOJ9OeKy6_Xyl | rs11895131 | 6.27             | 5.99                      | -0.131     | 1.91             | -31.18        | 0.095  | 9.218     | 0.502                             | 7.171      | 8.854      | 9.189      | 9.504  | 10.707                  | Yes  |
| LYCAT   | 6dwbogOJ9OeKy6_Xyl | rs10200895 | 15.58            | 14.86                     | -0.31      | 5.27             | -25.98        | 0.115  | 9.218     | 0.502                             | 7.171      | 8.854      | 9.189      | 9.504  | 10.707                  | Yes  |
| LYCAT   | 6dwbogOJ9OeKy6_Xyl | rs2609920  | 6.04             | 5.77                      | -0.128     | 1.41             | -17.98        | 0.0985 | 9.218     | 0.502                             | 7.171      | 8.854      | 9.189      | 9.504  | 10.707                  | Yes  |
| LYCAT   | 6dwbogOJ9OeKy6_Xyl | rs12613783 | 4.6              | 4.40                      | -0.092     | 1.51             | -8.36         | 0.3325 | 9.218     | 0.502                             | 7.171      | 8.854      | 9.189      | 9.504  | 10.707                  | Yes  |
| LYCAT   | 6dwbogOJ9OeKy6_Xyl | rs12471868 | 15.58            | 14.86                     | 0.31       | 5.27             | -3.98         | 0.115  | 9.218     | 0.502                             | 7.171      | 8.854      | 9.189      | 9.504  | 10.707                  | Yes  |
| LYCAT   | 6dwbogOJ9OeKy6_Xyl | rs11127284 | 7.55             | 7.21                      | 0.154      | 2.84             | 6.02          | 0.305  | 9.218     | 0.502                             | 7.171      | 8.854      | 9.189      | 9.504  | 10.707                  | Yes  |
| LYCAT   | 6dwbogOJ9OeKy6_Xyl | rs2602777  | 3.64             | 3.49                      | 0.072      | 1.4              | 12.43         | 0.285  | 9.218     | 0.502                             | 7.171      | 8.854      | 9.189      | 9.504  | 10.707                  | Yes  |
| LYCAT   | 6dwbogOJ9OeKy6_Xyl | rs2602772  | 5.75             | 5.49                      | -0.117     | 3.3              | 18.17         | 0.195  | 9.218     | 0.502                             | 7.171      | 8.854      | 9.189      | 9.504  | 10.707                  | Yes  |
| LYCAT   | 6dwbogOJ9OeKy6_Xyl | rs6739960  | 5.33             | 5.10                      | 0.109      | 3.39             | 22.2          | 0.21   | 9.218     | 0.502                             | 7.171      | 8.854      | 9.189      | 9.504  | 10.707                  | Yes  |
| LYCAT   | 6dwbogOJ9OeKy6_Xyl | rs2609934  | 5.59             | 5.34                      | -0.115     | 2.67             | 28.89         | 0.1959 | 9.218     | 0.502                             | 7.171      | 8.854      | 9.189      | 9.504  | 10.707                  | Yes  |
| LYCAT   | 6dwbogOJ9OeKy6_Xyl | rs6719376  | 3.9              | 3.73                      | -0.077     | 1.87             | 33.48         | 0.21   | 9.218     | 0.502                             | 7.171      | 8.854      | 9.189      | 9.504  | 10.707                  | Yes  |
| LYPLAL1 | WTJl3eN9eTpOrj3oQo | rs6699816  | 3.82             | 3.66                      | 0.077      | 1.19             | 8.57          | 0.1332 | 8.345     | 0.355                             | 7.112      | 8.155      | 8.39       | 8.572  | 9.198                   |      |
| LYRM4   | QFrlQN6euhJf6lvog  | rs438934   | 5.1              | 4.88                      | 0.099      | 0.79             | 1.48          | 0.2975 | 8.706     | 0.316                             | 8.02       | 8.47       | 8.696      | 8.925  | 9.473                   |      |
| LYRM4   | QFrlQN6euhJf6lvog  | rs12195956 | 3.96             | 3.79                      | -0.075     | 1.12             | 3.03          | 0.2    | 8.706     | 0.316                             | 8.02       | 8.47       | 8.696      | 8.925  | 9.473                   |      |
| LYRM4   | QFrlQN6euhJf6lvog  | rs464681   | 3.79             | 3.63                      | 0.071      | 2.24             | 7.71          | 0.495  | 8.706     | 0.316                             | 8.02       | 8.47       | 8.696      | 8.925  | 9.473                   |      |
| LYRM4   | QFrlQN6euhJf6lvog  | rs11242992 | 4.74             | 4.53                      | -0.092     | 2.4              | 21.41         | 0.3175 | 8.706     | 0.316                             | 8.02       | 8.47       | 8.696      | 8.925  | 9.473                   |      |

| Symbol   | Lumi nuID          | SNP        | Population-based             | Population-based                      | % Variance Explained | Family-based                 | Distance from transcript (kb) | MAF    | Mean   | Transcript abundance (log2 scale) |         |                 |        |                 | SNP mapping under probe |         |
|----------|--------------------|------------|------------------------------|---------------------------------------|----------------------|------------------------------|-------------------------------|--------|--------|-----------------------------------|---------|-----------------|--------|-----------------|-------------------------|---------|
|          |                    |            | association p-value (-log10) | association p-value (-log10), GC adj. |                      | association p-value (-log10) |                               |        |        | Standard Deviation                | Minimum | 25th percentile | Median | 75th percentile |                         | Maximum |
| LYRM4    | QFrIQN6euhJF6lvog  | rs464606   | 5.57                         | 5.32                                  | -0.11                | 1.84                         | 21.78                         | 0.3869 | 8.706  | 0.316                             | 8.02    | 8.47            | 8.696  | 8.925           | 9.473                   |         |
| LYRM4    | QFrIQN6euhJF6lvog  | rs385315   | 4.04                         | 3.86                                  | 0.076                | 2.13                         | 23.89                         | 0.4975 | 8.706  | 0.316                             | 8.02    | 8.47            | 8.696  | 8.925           | 9.473                   |         |
| LYRM4    | QFrIQN6euhJF6lvog  | rs460416   | 5.97                         | 5.70                                  | 0.117                | 1.28                         | 29.12                         | 0.2526 | 8.706  | 0.316                             | 8.02    | 8.47            | 8.696  | 8.925           | 9.473                   |         |
| LYRM4    | QFrIQN6euhJF6lvog  | rs457453   | 4.19                         | 4.01                                  | 0.079                | 2.31                         | 29.27                         | 0.4425 | 8.706  | 0.316                             | 8.02    | 8.47            | 8.696  | 8.925           | 9.473                   |         |
| LYRM4    | QFrIQN6euhJF6lvog  | rs6597115  | 4.88                         | 4.67                                  | -0.095               | 1.15                         | 34.19                         | 0.2    | 8.706  | 0.316                             | 8.02    | 8.47            | 8.696  | 8.925           | 9.473                   |         |
| LYST     | ck6CIUv2_ScXqCGvna | rs7535375  | 3.73                         | 3.57                                  | -0.073               | 0.96                         | -9.32                         | 0.4075 | 7.104  | 0.006                             | 7.09    | 7.1             | 7.103  | 7.107           | 7.127                   | Yes     |
| LYST     | ck6CIUv2_ScXqCGvna | rs6696123  | 3.9                          | 3.74                                  | 0.077                | 0.97                         | 22.82                         | 0.41   | 7.104  | 0.006                             | 7.09    | 7.1             | 7.103  | 7.107           | 7.127                   | Yes     |
| LYST     | ck6CIUv2_ScXqCGvna | rs6692303  | 4.08                         | 3.90                                  | 0.081                | 0.97                         | -49.63                        | 0.41   | 7.104  | 0.006                             | 7.09    | 7.1             | 7.103  | 7.107           | 7.127                   | Yes     |
| MAD2L1BP | 6meDRU3r_ici_fxrl  | rs1617105  | 4.88                         | 4.67                                  | -0.094               | 1.64                         | 4.49                          | 0.2925 | 9.085  | 0.274                             | 8.407   | 8.897           | 9.086  | 9.26            | 9.68                    |         |
| MAML3    | 0Sq6qnU83.AJ9dQOdI | rs17050873 | 3.47                         | 3.33                                  | 0.066                | 1.73                         | -6.41                         | 0.07   | 7.411  | 0.122                             | 7.187   | 7.316           | 7.403  | 7.482           | 7.866                   |         |
| MAML3    | 0Sq6qnU83.AJ9dQOdI | rs17286383 | 4.5                          | 4.31                                  | -0.088               | 2.4                          | 13.68                         | 0.0675 | 7.411  | 0.122                             | 7.187   | 7.316           | 7.403  | 7.482           | 7.866                   |         |
| MAML3    | 0Sq6qnU83.AJ9dQOdI | rs12646059 | 4.31                         | 4.12                                  | -0.082               | 2.34                         | 30.55                         | 0.135  | 7.411  | 0.122                             | 7.187   | 7.316           | 7.403  | 7.482           | 7.866                   |         |
| MAN1A2   | QSGfdCo4ohIFXH1C50 | rs3767793  | 3.33                         | 3.19                                  | 0.063                | 1.52                         | 26.02                         | 0.3564 | 7.813  | 0.149                             | 7.215   | 7.727           | 7.811  | 7.908           | 8.359                   |         |
| MAN2A1   | 9i0RfTRzX45PRdWkdI | rs31597    | 4.86                         | 4.64                                  | -0.096               | 1.54                         | -17.6                         | 0.3125 | 11.141 | 0.351                             | 10.358  | 10.932          | 11.078 | 11.306          | 12.526                  |         |
| MAN2C1   | x9Que1e_dufSXWUR4s | rs9972533  | 3.43                         | 3.28                                  | 0.064                | 0.44                         | 9.14                          | 0.1288 | 10.464 | 0.594                             | 9.279   | 9.994           | 10.388 | 10.831          | 13.124                  |         |
| MAN2C1   | x9Que1e_dufSXWUR4s | rs4886699  | 9.41                         | 8.98                                  | 0.184                | 2.78                         | 31.36                         | 0.2638 | 10.464 | 0.594                             | 9.279   | 9.994           | 10.388 | 10.831          | 13.124                  |         |
| MAP2K6   | i55NrQAdR_Tgj5GXK  | rs1972933  | 3.61                         | 3.46                                  | 0.069                | 0.41                         | 29.97                         | 0.5    | 7.458  | 0.188                             | 7.107   | 7.301           | 7.461  | 7.6             | 7.864                   |         |
| MAP3K2   | 3kl0CDxv1QDtlLning | rs1143407  | 18.38                        | 17.52                                 | 0.344                | 6.22                         | -39.89                        | 0.2286 | 8.89   | 0.474                             | 7.11    | 8.585           | 8.915  | 9.26            | 10.341                  | Yes     |
| MAP3K2   | 3kl0CDxv1QDtlLning | rs1011019  | 4.24                         | 4.06                                  | -0.082               | 0.36                         | -26.22                        | 0.26   | 8.89   | 0.474                             | 7.11    | 8.585           | 8.915  | 9.26            | 10.341                  | Yes     |
| MAP3K2   | 3kl0CDxv1QDtlLning | rs7556675  | 4.24                         | 4.06                                  | -0.082               | 0.36                         | -10.03                        | 0.26   | 8.89   | 0.474                             | 7.11    | 8.585           | 8.915  | 9.26            | 10.341                  | Yes     |
| MAP3K2   | 3kl0CDxv1QDtlLning | rs3732209  | 3.74                         | 3.58                                  | 0.072                | 0.13                         | 16.03                         | 0.2868 | 8.89   | 0.474                             | 7.11    | 8.585           | 8.915  | 9.26            | 10.341                  | Yes     |
| MAP3K2   | 3kl0CDxv1QDtlLning | rs4662721  | 20.06                        | 19.12                                 | -0.372               | 6.57                         | 1.61                          | 0.2362 | 8.89   | 0.474                             | 7.11    | 8.585           | 8.915  | 9.26            | 10.341                  | Yes     |
| MAP3K2   | 3kl0CDxv1QDtlLning | rs2139142  | 20.13                        | 19.18                                 | -0.372               | 6.42                         | 30.96                         | 0.235  | 8.89   | 0.474                             | 7.11    | 8.585           | 8.915  | 9.26            | 10.341                  | Yes     |
| MAP3K4   | 6uU8ceXGhTZd7ddb0  | rs2293287  | 3.72                         | 3.57                                  | 0.07                 | 0.94                         | 12.61                         | 0.075  | 10.105 | 0.304                             | 9.348   | 9.87            | 10.103 | 10.325          | 11.167                  |         |
| MAP3K4   | 6uU8ceXGhTZd7ddb0  | rs3734462  | 3.79                         | 3.63                                  | 0.07                 | 0.51                         | 19.25                         | 0.1725 | 10.105 | 0.304                             | 9.348   | 9.87            | 10.103 | 10.325          | 11.167                  |         |
| MAP6D1   | fIQJu581Cq9Jz14fRo | rs262957   | 13                           | 12.40                                 | 0.248                | 3.94                         | -47.37                        | 0.4575 | 7.974  | 0.263                             | 7.388   | 7.789           | 7.951  | 8.14            | 8.886                   |         |
| MAP6D1   | fIQJu581Cq9Jz14fRo | rs263009   | 6.64                         | 6.35                                  | 0.128                | 4.23                         | -36.55                        | 0.3575 | 7.974  | 0.263                             | 7.388   | 7.789           | 7.951  | 8.14            | 8.886                   |         |
| MAP6D1   | fIQJu581Cq9Jz14fRo | rs263044   | 13.25                        | 12.64                                 | -0.252               | 3.96                         | -15.67                        | 0.455  | 7.974  | 0.263                             | 7.388   | 7.789           | 7.951  | 8.14            | 8.886                   |         |
| MAP6D1   | fIQJu581Cq9Jz14fRo | rs2278968  | 7.81                         | 7.46                                  | 0.153                | 3.78                         | -12.07                        | 0.34   | 7.974  | 0.263                             | 7.388   | 7.789           | 7.951  | 8.14            | 8.886                   |         |
| MAP6D1   | fIQJu581Cq9Jz14fRo | rs263025   | 13                           | 12.40                                 | 0.248                | 3.94                         | -6.05                         | 0.4575 | 7.974  | 0.263                             | 7.388   | 7.789           | 7.951  | 8.14            | 8.886                   |         |
| MAP6D1   | fIQJu581Cq9Jz14fRo | rs2582093  | 11.3                         | 10.78                                 | -0.218               | 4.64                         | -0.29                         | 0.34   | 7.974  | 0.263                             | 7.388   | 7.789           | 7.951  | 8.14            | 8.886                   |         |
| MAP6D1   | fIQJu581Cq9Jz14fRo | rs897604   | 8.58                         | 8.19                                  | -0.167               | 3.62                         | 2.09                          | 0.4775 | 7.974  | 0.263                             | 7.388   | 7.789           | 7.951  | 8.14            | 8.886                   |         |
| MAP6D1   | fIQJu581Cq9Jz14fRo | rs894000   | 6.61                         | 6.32                                  | 0.128                | 4.32                         | 2.39                          | 0.3575 | 7.974  | 0.263                             | 7.388   | 7.789           | 7.951  | 8.14            | 8.886                   |         |
| MAP6D1   | fIQJu581Cq9Jz14fRo | rs2606228  | 5.31                         | 5.08                                  | -0.103               | 3.49                         | 4.09                          | 0.3535 | 7.974  | 0.263                             | 7.388   | 7.789           | 7.951  | 8.14            | 8.886                   |         |
| MAP6D1   | fIQJu581Cq9Jz14fRo | rs3749446  | 3.8                          | 3.64                                  | -0.07                | 2.04                         | 42.64                         | 0.345  | 7.974  | 0.263                             | 7.388   | 7.789           | 7.951  | 8.14            | 8.886                   |         |
| MAPK14   | TUn0kjm3hKBFVZ83Q  | rs969659   | 3.92                         | 3.75                                  | 0.078                | 1.84                         | -32.59                        | 0.495  | 7.491  | 0.16                              | 7.133   | 7.378           | 7.476  | 7.59            | 8.045                   |         |
| MAPK14   | TUn0kjm3hKBFVZ83Q  | rs851019   | 3.78                         | 3.62                                  | -0.075               | 1.92                         | 18.59                         | 0.4397 | 7.491  | 0.16                              | 7.133   | 7.378           | 7.476  | 7.59            | 8.045                   |         |
| MAPK14   | TUn0kjm3hKBFVZ83Q  | rs664367   | 3.47                         | 3.32                                  | -0.069               | 1.7                          | 23.65                         | 0.4369 | 7.491  | 0.16                              | 7.133   | 7.378           | 7.476  | 7.59            | 8.045                   |         |
| MAPK14   | TUn0kjm3hKBFVZ83Q  | rs851010   | 3.81                         | 3.65                                  | -0.076               | 2.27                         | -37.1                         | 0.44   | 7.491  | 0.16                              | 7.133   | 7.378           | 7.476  | 7.59            | 8.045                   |         |
| MASTL    | ioeoA3kk0hzi.TVUII | rs1753415  | 5.3                          | 5.06                                  | -0.106               | 2.25                         | -49.19                        | 0.1575 | 7.658  | 0.213                             | 7.124   | 7.51            | 7.665  | 7.786           | 8.432                   |         |
| MASTL    | ioeoA3kk0hzi.TVUII | rs12255977 | 3.53                         | 3.38                                  | 0.064                | 0.66                         | -25.09                        | 0.16   | 7.658  | 0.213                             | 7.124   | 7.51            | 7.665  | 7.786           | 8.432                   |         |
| MASTL    | ioeoA3kk0hzi.TVUII | rs10829194 | 3.53                         | 3.38                                  | 0.064                | 0.66                         | -18.85                        | 0.16   | 7.658  | 0.213                             | 7.124   | 7.51            | 7.665  | 7.786           | 8.432                   |         |
| MASTL    | ioeoA3kk0hzi.TVUII | rs2274634  | 3.74                         | 3.58                                  | 0.068                | 0.7                          | -9.81                         | 0.1625 | 7.658  | 0.213                             | 7.124   | 7.51            | 7.665  | 7.786           | 8.432                   |         |
| MASTL    | ioeoA3kk0hzi.TVUII | rs3780926  | 10.81                        | 10.32                                 | 0.207                | 3.5                          | -8                            | 0.3275 | 7.658  | 0.213                             | 7.124   | 7.51            | 7.665  | 7.786           | 8.432                   |         |
| MASTL    | ioeoA3kk0hzi.TVUII | rs1775350  | 5.3                          | 5.06                                  | -0.106               | 2.25                         | -2.32                         | 0.1575 | 7.658  | 0.213                             | 7.124   | 7.51            | 7.665  | 7.786           | 8.432                   |         |
| MASTL    | ioeoA3kk0hzi.TVUII | rs6482601  | 5.12                         | 4.90                                  | -0.096               | 2.15                         | -11.25                        | 0.4125 | 7.658  | 0.213                             | 7.124   | 7.51            | 7.665  | 7.786           | 8.432                   |         |
| MASTL    | ioeoA3kk0hzi.TVUII | rs7091128  | 11.29                        | 10.77                                 | -0.217               | 3.83                         | -9.38                         | 0.32   | 7.658  | 0.213                             | 7.124   | 7.51            | 7.665  | 7.786           | 8.432                   |         |
| MASTL    | ioeoA3kk0hzi.TVUII | rs4747589  | 5.05                         | 4.83                                  | 0.099                | 2.87                         | 14.38                         | 0.2526 | 7.658  | 0.213                             | 7.124   | 7.51            | 7.665  | 7.786           | 8.432                   |         |
| MASTL    | ioeoA3kk0hzi.TVUII | rs10764690 | 5.63                         | 5.38                                  | -0.105               | 2.94                         | 32.91                         | 0.48   | 7.658  | 0.213                             | 7.124   | 7.51            | 7.665  | 7.786           | 8.432                   |         |
| MATN2    | 6e6EQfn3i015fLuQ3Q | rs2449545  | 4.63                         | 4.43                                  | 0.09                 | 1.5                          | -35.09                        | 0.1775 | 7.362  | 0.196                             | 7.098   | 7.215           | 7.328  | 7.458           | 7.991                   |         |
| MATN2    | 6e6EQfn3i015fLuQ3Q | rs2449520  | 3.67                         | 3.51                                  | -0.069               | 1.19                         | -30.21                        | 0.191  | 7.362  | 0.196                             | 7.098   | 7.215           | 7.328  | 7.458           | 7.991                   |         |
| MATN2    | 6e6EQfn3i015fLuQ3Q | rs10504983 | 8.48                         | 8.09                                  | -0.167               | 4.39                         | -15.25                        | 0.17   | 7.362  | 0.196                             | 7.098   | 7.215           | 7.328  | 7.458           | 7.991                   |         |
| MBP      | KEak1_HU2pn3_muEqs | rs2051344  | 6.57                         | 6.28                                  | -0.139               | 0.53                         | -13.4                         | 0.355  | 9.214  | 0.57                              | 7.259   | 8.956           | 9.201  | 9.611           | 10.809                  |         |
| MBP      | KEak1_HU2pn3_muEqs | rs7232502  | 6.88                         | 6.57                                  | 0.145                | 0.3                          | -1.44                         | 0.37   | 9.214  | 0.57                              | 7.259   | 8.956           | 9.201  | 9.611           | 10.809                  |         |
| MBP      | KEak1_HU2pn3_muEqs | rs4890876  | 3.46                         | 3.31                                  | 0.068                | 0.37                         | 3.03                          | 0.4121 | 9.214  | 0.57                              | 7.259   | 8.956           | 9.201  | 9.611           | 10.809                  |         |
| MCM10    | oq6CuezcH7vXXCvO1w | rs2281797  | 3.3                          | 3.16                                  | 0.061                | 0.43                         | 11.18                         | 0.2638 | 7.17   | 0.065                             | 7.105   | 7.133           | 7.149  | 7.187           | 7.571                   |         |
| MDGA1    | ft1FUI3vVT_Xd.RdQk | rs13219089 | 3.93                         | 3.76                                  | -0.073               | 2.13                         | -19.08                        | 0.103  | 7.389  | 0.214                             | 7.13    | 7.224           | 7.324  | 7.51            | 8.227                   |         |
| MDGA1    | ft1FUI3vVT_Xd.RdQk | rs12665609 | 4.01                         | 3.83                                  | -0.076               | 2.24                         | -13.8                         | 0.1675 | 7.389  | 0.214                             | 7.13    | 7.224           | 7.324  | 7.51            | 8.227                   |         |
| MDGA1    | ft1FUI3vVT_Xd.RdQk | rs9366942  | 3.35                         | 3.21                                  | 0.064                | 1.2                          | -9.98                         | 0.2487 | 7.389  | 0.214                             | 7.13    | 7.224           | 7.324  | 7.51            | 8.227                   |         |
| MDGA1    | ft1FUI3vVT_Xd.RdQk | rs12191311 | 9.47                         | 9.04                                  | -0.184               | 4.38                         | 3.42                          | 0.455  | 7.389  | 0.214                             | 7.13    | 7.224           | 7.324  | 7.51            | 8.227                   |         |
| MDGA1    | ft1FUI3vVT_Xd.RdQk | rs10947686 | 10.64                        | 10.15                                 | 0.206                | 4.72                         | 6.52                          | 0.49   | 7.389  | 0.214                             | 7.13    | 7.224           | 7.324  | 7.51            | 8.227                   |         |
| MDGA1    | ft1FUI3vVT_Xd.RdQk | rs4714089  | 17.96                        | 17.12                                 | -0.342               | 4.25                         | 10.62                         | 0.3475 | 7.389  | 0.214                             | 7.13    | 7.224           | 7.324  | 7.51            | 8.227                   |         |



| Symbol   | Lumi nuID          | SNP        | Population-based             | Population-based                      | % Variance Explained | Family-based                 | Distance from transcript (kb) | MAF    | Mean  | Transcript abundance (log2 scale) |         |                 |        |                 | SNP mapping under probe |         |
|----------|--------------------|------------|------------------------------|---------------------------------------|----------------------|------------------------------|-------------------------------|--------|-------|-----------------------------------|---------|-----------------|--------|-----------------|-------------------------|---------|
|          |                    |            | association p-value (-log10) | association p-value (-log10), GC adj. |                      | association p-value (-log10) |                               |        |       | Standard Deviation                | Minimum | 25th percentile | Median | 75th percentile |                         | Maximum |
| MDGA1    | ft1FUI3vVT_Xd.RdQk | rs7745284  | 7.69                         | 7.34                                  | -0.16                | 3.18                         | 15.79                         | 0.3375 | 7.389 | 0.214                             | 7.13    | 7.224           | 7.324  | 7.51            | 8.227                   |         |
| MDGA1    | ft1FUI3vVT_Xd.RdQk | rs9462343  | 9.65                         | 9.21                                  | -0.192               | 2.71                         | 20.49                         | 0.18   | 7.389 | 0.214                             | 7.13    | 7.224           | 7.324  | 7.51            | 8.227                   |         |
| MDGA1    | ft1FUI3vVT_Xd.RdQk | rs3846876  | 18.47                        | 17.60                                 | 0.353                | 4.73                         | 24.39                         | 0.3232 | 7.389 | 0.214                             | 7.13    | 7.224           | 7.324  | 7.51            | 8.227                   |         |
| MDGA1    | ft1FUI3vVT_Xd.RdQk | rs6922589  | 4.45                         | 4.26                                  | 0.086                | 1.87                         | 27.34                         | 0.1475 | 7.389 | 0.214                             | 7.13    | 7.224           | 7.324  | 7.51            | 8.227                   |         |
| MDGA1    | ft1FUI3vVT_Xd.RdQk | rs4711509  | 19.28                        | 18.38                                 | -0.365               | 4.91                         | 29.11                         | 0.325  | 7.389 | 0.214                             | 7.13    | 7.224           | 7.324  | 7.51            | 8.227                   |         |
| MDGA1    | ft1FUI3vVT_Xd.RdQk | rs10947690 | 7.22                         | 6.90                                  | -0.142               | 5.1                          | 31.48                         | 0.2925 | 7.389 | 0.214                             | 7.13    | 7.224           | 7.324  | 7.51            | 8.227                   |         |
| MDGA1    | ft1FUI3vVT_Xd.RdQk | rs6925749  | 14.91                        | 14.21                                 | 0.28                 | 4.16                         | 32.74                         | 0.23   | 7.389 | 0.214                             | 7.13    | 7.224           | 7.324  | 7.51            | 8.227                   |         |
| MDGA1    | ft1FUI3vVT_Xd.RdQk | rs4714092  | 10.23                        | 9.76                                  | -0.197               | 3.2                          | -21.71                        | 0.2337 | 7.389 | 0.214                             | 7.13    | 7.224           | 7.324  | 7.51            | 8.227                   |         |
| MDGA1    | ft1FUI3vVT_Xd.RdQk | rs10947692 | 6.11                         | 5.84                                  | 0.118                | 2.03                         | -21.5                         | 0.3475 | 7.389 | 0.214                             | 7.13    | 7.224           | 7.324  | 7.51            | 8.227                   |         |
| MDGA1    | ft1FUI3vVT_Xd.RdQk | rs989713   | 11.32                        | 10.80                                 | -0.217               | 3.1                          | -16.05                        | 0.22   | 7.389 | 0.214                             | 7.13    | 7.224           | 7.324  | 7.51            | 8.227                   |         |
| MDGA1    | ft1FUI3vVT_Xd.RdQk | rs11752386 | 4.72                         | 4.52                                  | 0.092                | 3.43                         | -15.13                        | 0.2025 | 7.389 | 0.214                             | 7.13    | 7.224           | 7.324  | 7.51            | 8.227                   |         |
| MDGA1    | ft1FUI3vVT_Xd.RdQk | rs6916856  | 9.85                         | 9.40                                  | -0.202               | 6.63                         | -5.65                         | 0.3675 | 7.389 | 0.214                             | 7.13    | 7.224           | 7.324  | 7.51            | 8.227                   |         |
| MDGA1    | ft1FUI3vVT_Xd.RdQk | rs6458011  | 15.96                        | 15.22                                 | -0.297               | 4.55                         | -4.9                          | 0.33   | 7.389 | 0.214                             | 7.13    | 7.224           | 7.324  | 7.51            | 8.227                   |         |
| MDGA1    | ft1FUI3vVT_Xd.RdQk | rs10947693 | 5.82                         | 5.56                                  | 0.115                | 3.18                         | -1.54                         | 0.2423 | 7.389 | 0.214                             | 7.13    | 7.224           | 7.324  | 7.51            | 8.227                   |         |
| MDGA1    | ft1FUI3vVT_Xd.RdQk | rs6938061  | 18.13                        | 17.28                                 | -0.348               | 7.74                         | 8.57                          | 0.4675 | 7.389 | 0.214                             | 7.13    | 7.224           | 7.324  | 7.51            | 8.227                   |         |
| MDGA1    | ft1FUI3vVT_Xd.RdQk | rs4714100  | 5.43                         | 5.19                                  | -0.107               | 3.09                         | 17.07                         | 0.2538 | 7.389 | 0.214                             | 7.13    | 7.224           | 7.324  | 7.51            | 8.227                   |         |
| MDGA1    | ft1FUI3vVT_Xd.RdQk | rs6458014  | 5.51                         | 5.27                                  | 0.109                | 2.08                         | 22.39                         | 0.4275 | 7.389 | 0.214                             | 7.13    | 7.224           | 7.324  | 7.51            | 8.227                   |         |
| ME3      | oZsQEEXp9ccVllwoQo | rs1540082  | 3.47                         | 3.32                                  | 0.065                | 1.91                         | -81.71                        | 0.2575 | 7.612 | 0.315                             | 7.132   | 7.367           | 7.563  | 7.824           | 9.161                   | Yes     |
| ME3      | oZsQEEXp9ccVllwoQo | rs4382935  | 3.37                         | 3.22                                  | -0.061               | 2.26                         | -80.1                         | 0.485  | 7.612 | 0.315                             | 7.132   | 7.367           | 7.563  | 7.824           | 9.161                   | Yes     |
| ME3      | oZsQEEXp9ccVllwoQo | rs10400291 | 4.17                         | 3.99                                  | -0.079               | 1.64                         | -79.37                        | 0.2225 | 7.612 | 0.315                             | 7.132   | 7.367           | 7.563  | 7.824           | 9.161                   | Yes     |
| ME3      | oZsQEEXp9ccVllwoQo | rs6592301  | 5.01                         | 4.79                                  | 0.095                | 1.3                          | -64.52                        | 0.3625 | 7.612 | 0.315                             | 7.132   | 7.367           | 7.563  | 7.824           | 9.161                   | Yes     |
| ME3      | oZsQEEXp9ccVllwoQo | rs4245423  | 4.93                         | 4.71                                  | 0.094                | 1.16                         | -62.43                        | 0.3618 | 7.612 | 0.315                             | 7.132   | 7.367           | 7.563  | 7.824           | 9.161                   | Yes     |
| ME3      | oZsQEEXp9ccVllwoQo | rs4944603  | 5.01                         | 4.79                                  | -0.095               | 1.32                         | -61.85                        | 0.3625 | 7.612 | 0.315                             | 7.132   | 7.367           | 7.563  | 7.824           | 9.161                   | Yes     |
| ME3      | oZsQEEXp9ccVllwoQo | rs7120052  | 3.99                         | 3.82                                  | -0.075               | 1.84                         | -47.97                        | 0.1925 | 7.612 | 0.315                             | 7.132   | 7.367           | 7.563  | 7.824           | 9.161                   | Yes     |
| ME3      | oZsQEEXp9ccVllwoQo | rs7105863  | 5.91                         | 5.65                                  | -0.113               | 1.74                         | -47.87                        | 0.3475 | 7.612 | 0.315                             | 7.132   | 7.367           | 7.563  | 7.824           | 9.161                   | Yes     |
| ME3      | oZsQEEXp9ccVllwoQo | rs1894012  | 4.13                         | 3.95                                  | -0.078               | 1.64                         | -43.56                        | 0.2161 | 7.612 | 0.315                             | 7.132   | 7.367           | 7.563  | 7.824           | 9.161                   | Yes     |
| ME3      | oZsQEEXp9ccVllwoQo | rs7123010  | 5.21                         | 4.99                                  | -0.103               | 2.6                          | -42.24                        | 0.3214 | 7.612 | 0.315                             | 7.132   | 7.367           | 7.563  | 7.824           | 9.161                   | Yes     |
| ME3      | oZsQEEXp9ccVllwoQo | rs10501627 | 3.57                         | 3.42                                  | -0.065               | 3.49                         | -31.93                        | 0.435  | 7.612 | 0.315                             | 7.132   | 7.367           | 7.563  | 7.824           | 9.161                   | Yes     |
| ME3      | oZsQEEXp9ccVllwoQo | rs1938921  | 4.82                         | 4.61                                  | 0.092                | 0.93                         | -29.51                        | 0.215  | 7.612 | 0.315                             | 7.132   | 7.367           | 7.563  | 7.824           | 9.161                   | Yes     |
| ME3      | oZsQEEXp9ccVllwoQo | rs746490   | 4.75                         | 4.55                                  | 0.09                 | 1.41                         | 22.66                         | 0.06   | 7.612 | 0.315                             | 7.132   | 7.367           | 7.563  | 7.824           | 9.161                   | Yes     |
| MED16    | ioSTXnfWXnRQnejec  | rs1651895  | 3.36                         | 3.21                                  | -0.066               | 1.08                         | -1.94                         | 0.2475 | 8.808 | 0.625                             | 7.106   | 8.5             | 8.715  | 9.101           | 10.684                  |         |
| MED16    | i12v1_XRWalmeBehCQ | rs13090    | 3.75                         | 3.59                                  | 0.073                | 1.89                         | 0.15                          | 0.28   | 10.65 | 0.373                             | 9.612   | 10.408          | 10.647 | 10.882          | 12.058                  |         |
| MED16    | ioSTXnfWXnRQnejec  | rs13090    | 3.32                         | 3.18                                  | 0.064                | 0.74                         | 0.15                          | 0.28   | 8.808 | 0.625                             | 7.106   | 8.5             | 8.715  | 9.101           | 10.684                  |         |
| MED16    | i12v1_XRWalmeBehCQ | rs1683591  | 3.51                         | 3.37                                  | 0.067                | 1.52                         | 1.07                          | 0.2825 | 10.65 | 0.373                             | 9.612   | 10.408          | 10.647 | 10.882          | 12.058                  |         |
| MED16    | ioSTXnfWXnRQnejec  | rs1683591  | 3.29                         | 3.15                                  | 0.063                | 0.99                         | 1.07                          | 0.2825 | 8.808 | 0.625                             | 7.106   | 8.5             | 8.715  | 9.101           | 10.684                  |         |
| MED16    | ioSTXnfWXnRQnejec  | rs2965292  | 3.53                         | 3.38                                  | 0.069                | 0.92                         | -2.37                         | 0.2487 | 8.808 | 0.625                             | 7.106   | 8.5             | 8.715  | 9.101           | 10.684                  |         |
| MED16    | i12v1_XRWalmeBehCQ | rs2965292  | 3.41                         | 3.27                                  | 0.066                | 1.94                         | -2.37                         | 0.2487 | 10.65 | 0.373                             | 9.612   | 10.408          | 10.647 | 10.882          | 12.058                  |         |
| MED4     | BkFP31fRfXffEvVSio | rs1410116  | 24.87                        | 23.70                                 | -0.454               | 3.93                         | 16.68                         | 0.0653 | 9.849 | 0.327                             | 9.201   | 9.632           | 9.827  | 9.991           | 10.9                    |         |
| MED4     | BkFP31fRfXffEvVSio | rs9526450  | 8.29                         | 7.92                                  | 0.177                | 1.73                         | 29.55                         | 0.135  | 9.849 | 0.327                             | 9.201   | 9.632           | 9.827  | 9.991           | 10.9                    |         |
| MED4     | BkFP31fRfXffEvVSio | rs9526455  | 25.79                        | 24.57                                 | -0.47                | 3.95                         | 43.23                         | 0.0603 | 9.849 | 0.327                             | 9.201   | 9.632           | 9.827  | 9.991           | 10.9                    |         |
| MED4     | BkFP31fRfXffEvVSio | rs7317685  | 25.81                        | 24.59                                 | -0.469               | 3.93                         | 46.51                         | 0.06   | 9.849 | 0.327                             | 9.201   | 9.632           | 9.827  | 9.991           | 10.9                    |         |
| MED4     | BkFP31fRfXffEvVSio | rs7325115  | 20.45                        | 19.49                                 | 0.394                | 4.14                         | 47.78                         | 0.075  | 9.849 | 0.327                             | 9.201   | 9.632           | 9.827  | 9.991           | 10.9                    |         |
| MEIS2    | 0ep5_7d4D4QoZKg1k  | rs8033784  | 3.32                         | 3.18                                  | 0.068                | 0.44                         | -13.37                        | 0.14   | 7.133 | 0.028                             | 7.105   | 7.118           | 7.125  | 7.14            | 7.318                   |         |
| MEIS2    | 0ep5_7d4D4QoZKg1k  | rs8036552  | 4.88                         | 4.66                                  | -0.098               | 0.96                         | -11.6                         | 0.105  | 7.133 | 0.028                             | 7.105   | 7.118           | 7.125  | 7.14            | 7.318                   |         |
| MEOX1    | xnrnkiorQbi.o3fsZl | rs1320304  | 3.37                         | 3.23                                  | -0.062               | 0.87                         | -43.77                        | 0.4447 | 8.144 | 0.257                             | 7.258   | 7.972           | 8.126  | 8.315           | 8.969                   |         |
| MEOX1    | xnrnkiorQbi.o3fsZl | rs536652   | 4.82                         | 4.61                                  | -0.089               | 0.84                         | -11.8                         | 0.4875 | 8.144 | 0.257                             | 7.258   | 7.972           | 8.126  | 8.315           | 8.969                   |         |
| MEOX1    | xnrnkiorQbi.o3fsZl | rs1398882  | 7.24                         | 6.92                                  | -0.136               | 0.67                         | 9.52                          | 0.4675 | 8.144 | 0.257                             | 7.258   | 7.972           | 8.126  | 8.315           | 8.969                   |         |
| MEOX1    | xnrnkiorQbi.o3fsZl | rs9902563  | 7.29                         | 6.96                                  | 0.136                | 0.88                         | 18.05                         | 0.4325 | 8.144 | 0.257                             | 7.258   | 7.972           | 8.126  | 8.315           | 8.969                   |         |
| MEOX1    | xnrnkiorQbi.o3fsZl | rs1398883  | 6.35                         | 6.07                                  | 0.119                | 0.53                         | 21.46                         | 0.4095 | 8.144 | 0.257                             | 7.258   | 7.972           | 8.126  | 8.315           | 8.969                   |         |
| MEOX1    | xnrnkiorQbi.o3fsZl | rs9901754  | 6.39                         | 6.10                                  | -0.12                | 0.7                          | 29.04                         | 0.41   | 8.144 | 0.257                             | 7.258   | 7.972           | 8.126  | 8.315           | 8.969                   |         |
| MEOX1    | xnrnkiorQbi.o3fsZl | rs9912855  | 6.07                         | 5.81                                  | -0.114               | 1.17                         | 29.12                         | 0.1457 | 8.144 | 0.257                             | 7.258   | 7.972           | 8.126  | 8.315           | 8.969                   |         |
| MESP1    | fU6KhUppyEf4pCSinc | rs9920376  | 6.33                         | 6.03                                  | 0.125                | 1.24                         | -38.31                        | 0.3    | 7.248 | 0.094                             | 7.109   | 7.177           | 7.225  | 7.311           | 7.596                   |         |
| MESP1    | fU6KhUppyEf4pCSinc | rs7179296  | 5.05                         | 4.84                                  | 0.102                | 2.3                          | -24.34                        | 0.0761 | 7.248 | 0.094                             | 7.109   | 7.177           | 7.225  | 7.311           | 7.596                   |         |
| MESP1    | fU6KhUppyEf4pCSinc | rs3743115  | 8.34                         | 7.96                                  | 0.166                | 2.37                         | -0.5                          | 0.3275 | 7.248 | 0.094                             | 7.109   | 7.177           | 7.225  | 7.311           | 7.596                   |         |
| MESP1    | fU6KhUppyEf4pCSinc | rs11073889 | 5.2                          | 4.98                                  | 0.101                | 1.3                          | 27.45                         | 0.4146 | 7.248 | 0.094                             | 7.109   | 7.177           | 7.225  | 7.311           | 7.596                   |         |
| METRn    | oJhniedelk5FJh9sPQ | rs12448432 | 3.46                         | 3.31                                  | -0.066               | 2.1                          | 11.34                         | 0.215  | 7.3   | 0.167                             | 7.102   | 7.182           | 7.245  | 7.371           | 7.984                   |         |
| MFSD9    | cEX9UndJL7Hk46JqU  | rs2732846  | 3.49                         | 3.36                                  | 0.065                | 0.49                         | 36.48                         | 0.495  | 7.257 | 0.135                             | 7.112   | 7.171           | 7.219  | 7.298           | 8.051                   |         |
| MGC15523 | QN5fHvfwEXmk20Tp_4 | rs7212762  | 3.93                         | 3.74                                  | 0.078                | 4.63                         | -14.16                        | 0.1275 | 7.508 | 0.175                             | 7.155   | 7.379           | 7.499  | 7.59            | 8.356                   |         |
| MGC16169 | lpNJFBJEVfTNRHdIQ  | rs6853554  | 4.48                         | 4.29                                  | -0.087               | 3.06                         | -19.75                        | 0.295  | 8.565 | 0.219                             | 7.165   | 8.44            | 8.586  | 8.701           | 9.085                   |         |
| MGC16169 | lpNJFBJEVfTNRHdIQ  | rs6533237  | 4.01                         | 3.84                                  | -0.079               | 2.26                         | -12.95                        | 0.3819 | 8.565 | 0.219                             | 7.165   | 8.44            | 8.586  | 8.701           | 9.085                   |         |
| MGC16169 | lpNJFBJEVfTNRHdIQ  | rs6843331  | 4.44                         | 4.25                                  | 0.087                | 2.22                         | -8.93                         | 0.375  | 8.565 | 0.219                             | 7.165   | 8.44            | 8.586  | 8.701           | 9.085                   |         |
| MGC16169 | lpNJFBJEVfTNRHdIQ  | rs7657962  | 4.23                         | 4.04                                  | -0.083               | 2.18                         | -0.52                         | 0.355  | 8.565 | 0.219                             | 7.165   | 8.44            | 8.586  | 8.701           | 9.085                   |         |

| Symbol   | Lumi nuID          | SNP        | Population-based association p-value (-log10) | Population-based association p-value (-log10), GC adj. | % Variance Explained | Family-based association p-value (-log10) | Distance from transcript (kb) | MAF    | Mean   | Transcript abundance (log2 scale) |         |                 |        |                 | SNP mapping under probe |         |
|----------|--------------------|------------|-----------------------------------------------|--------------------------------------------------------|----------------------|-------------------------------------------|-------------------------------|--------|--------|-----------------------------------|---------|-----------------|--------|-----------------|-------------------------|---------|
|          |                    |            |                                               |                                                        |                      |                                           |                               |        |        | Standard Deviation                | Minimum | 25th percentile | Median | 75th percentile |                         | Maximum |
| MGC16169 | IpNJFBJEVfTNRiHdIQ | rs17272618 | 4.4                                           | 4.21                                                   | 0.085                | 3.08                                      | 55.27                         | 0.2925 | 8.565  | 0.219                             | 7.165   | 8.44            | 8.586  | 8.701           | 9.085                   |         |
| MGC16169 | IpNJFBJEVfTNRiHdIQ | rs6849573  | 4.4                                           | 4.21                                                   | -0.085               | 2.74                                      | 56.77                         | 0.2925 | 8.565  | 0.219                             | 7.165   | 8.44            | 8.586  | 8.701           | 9.085                   |         |
| MGC16169 | IpNJFBJEVfTNRiHdIQ | rs6836198  | 4.02                                          | 3.85                                                   | -0.079               | 2.24                                      | 84.87                         | 0.3825 | 8.565  | 0.219                             | 7.165   | 8.44            | 8.586  | 8.701           | 9.085                   |         |
| MGC16169 | IpNJFBJEVfTNRiHdIQ | rs12512903 | 6.57                                          | 6.28                                                   | 0.131                | 2.39                                      | -91.54                        | 0.17   | 8.565  | 0.219                             | 7.165   | 8.44            | 8.586  | 8.701           | 9.085                   |         |
| MGC16169 | IpNJFBJEVfTNRiHdIQ | rs10516533 | 6.57                                          | 6.28                                                   | 0.131                | 2.53                                      | -68.65                        | 0.17   | 8.565  | 0.219                             | 7.165   | 8.44            | 8.586  | 8.701           | 9.085                   |         |
| MGC16169 | IpNJFBJEVfTNRiHdIQ | rs12641015 | 6.57                                          | 6.28                                                   | 0.131                | 2.44                                      | -65.2                         | 0.17   | 8.565  | 0.219                             | 7.165   | 8.44            | 8.586  | 8.701           | 9.085                   |         |
| MGC16169 | IpNJFBJEVfTNRiHdIQ | rs3762947  | 6.17                                          | 5.90                                                   | 0.123                | 2.27                                      | -0.74                         | 0.1675 | 8.565  | 0.219                             | 7.165   | 8.44            | 8.586  | 8.701           | 9.085                   |         |
| MGC16169 | IpNJFBJEVfTNRiHdIQ | rs3113249  | 3.78                                          | 3.62                                                   | 0.073                | 2.1                                       | 1.75                          | 0.3775 | 8.565  | 0.219                             | 7.165   | 8.44            | 8.586  | 8.701           | 9.085                   |         |
| MGC16169 | IpNJFBJEVfTNRiHdIQ | rs3113252  | 3.78                                          | 3.62                                                   | 0.073                | 2.1                                       | 15.02                         | 0.3775 | 8.565  | 0.219                             | 7.165   | 8.44            | 8.586  | 8.701           | 9.085                   |         |
| MGC16169 | IpNJFBJEVfTNRiHdIQ | rs3109955  | 3.49                                          | 3.35                                                   | -0.068               | 1.69                                      | 16.79                         | 0.3756 | 8.565  | 0.219                             | 7.165   | 8.44            | 8.586  | 8.701           | 9.085                   |         |
| MGC16169 | IpNJFBJEVfTNRiHdIQ | rs7654865  | 5.93                                          | 5.67                                                   | 0.12                 | 2.26                                      | 42.06                         | 0.1624 | 8.565  | 0.219                             | 7.165   | 8.44            | 8.586  | 8.701           | 9.085                   |         |
| MGC3020  | 39eohTVUX91pd4h.i0 | rs7204877  | 10.81                                         | 10.32                                                  | -0.221               | 3.82                                      | -46.63                        | 0.2944 | 9.002  | 0.572                             | 7.858   | 8.604           | 8.904  | 9.38            | 11.02                   |         |
| MGC3020  | 39eohTVUX91pd4h.i0 | rs4632148  | 10.14                                         | 9.67                                                   | -0.21                | 3.58                                      | -4.68                         | 0.2923 | 9.002  | 0.572                             | 7.858   | 8.604           | 8.904  | 9.38            | 11.02                   |         |
| MGC3020  | 39eohTVUX91pd4h.i0 | rs1468158  | 10.3                                          | 9.83                                                   | 0.208                | 3.48                                      | -2.83                         | 0.2975 | 9.002  | 0.572                             | 7.858   | 8.604           | 8.904  | 9.38            | 11.02                   |         |
| MGC3020  | 39eohTVUX91pd4h.i0 | rs17519579 | 3.69                                          | 3.53                                                   | 0.07                 | 2.2                                       | 11.77                         | 0.1212 | 9.002  | 0.572                             | 7.858   | 8.604           | 8.904  | 9.38            | 11.02                   |         |
| MGC34725 | 3JTggBXqTmP7iehhEk | rs2305058  | 3.77                                          | 3.61                                                   | -0.069               | 2.65                                      | -9.93                         | 0.5    | 7.121  | 0.013                             | 7.098   | 7.112           | 7.118  | 7.127           | 7.169                   |         |
| MGC34725 | 3JTggBXqTmP7iehhEk | rs173229   | 3.72                                          | 3.56                                                   | 0.07                 | 2.22                                      | 18.53                         | 0.4824 | 7.121  | 0.013                             | 7.098   | 7.112           | 7.118  | 7.127           | 7.169                   |         |
| MGC34725 | 3JTggBXqTmP7iehhEk | rs348365   | 4.01                                          | 3.84                                                   | 0.076                | 1.55                                      | 21.64                         | 0.4475 | 7.121  | 0.013                             | 7.098   | 7.112           | 7.118  | 7.127           | 7.169                   |         |
| MGMT     | fnpYB4s7kso6O.iYRE | rs1762438  | 6.19                                          | 5.91                                                   | 0.128                | 2.48                                      | -2.01                         | 0.4075 | 9.697  | 0.392                             | 7.281   | 9.534           | 9.737  | 9.946           | 10.52                   |         |
| MGMT     | fnpYB4s7kso6O.iYRE | rs1711650  | 5.94                                          | 5.68                                                   | 0.12                 | 2.23                                      | 3.48                          | 0.3175 | 9.697  | 0.392                             | 7.281   | 9.534           | 9.737  | 9.946           | 10.52                   |         |
| MGMT     | fnpYB4s7kso6O.iYRE | rs871026   | 8.34                                          | 7.97                                                   | -0.17                | 4.41                                      | 27.68                         | 0.4625 | 9.697  | 0.392                             | 7.281   | 9.534           | 9.737  | 9.946           | 10.52                   |         |
| MGMT     | fnpYB4s7kso6O.iYRE | rs12246239 | 5.92                                          | 5.66                                                   | 0.122                | 3.61                                      | 34.24                         | 0.2625 | 9.697  | 0.392                             | 7.281   | 9.534           | 9.737  | 9.946           | 10.52                   |         |
| MGMT     | fnpYB4s7kso6O.iYRE | rs1762418  | 8.34                                          | 7.97                                                   | -0.17                | 4.41                                      | 37.89                         | 0.4625 | 9.697  | 0.392                             | 7.281   | 9.534           | 9.737  | 9.946           | 10.52                   |         |
| MGMT     | fnpYB4s7kso6O.iYRE | rs10764889 | 5.21                                          | 4.98                                                   | -0.105               | 3.47                                      | 76.06                         | 0.49   | 9.697  | 0.392                             | 7.281   | 9.534           | 9.737  | 9.946           | 10.52                   |         |
| MGMT     | fnpYB4s7kso6O.iYRE | rs3858300  | 6.07                                          | 5.80                                                   | 0.124                | 4.63                                      | 76.66                         | 0.3325 | 9.697  | 0.392                             | 7.281   | 9.534           | 9.737  | 9.946           | 10.52                   |         |
| MGMT     | fnpYB4s7kso6O.iYRE | rs4751099  | 4.71                                          | 4.51                                                   | 0.098                | 3.1                                       | 81                            | 0.2846 | 9.697  | 0.392                             | 7.281   | 9.534           | 9.737  | 9.946           | 10.52                   |         |
| MGMT     | fnpYB4s7kso6O.iYRE | rs496298   | 3.35                                          | 3.21                                                   | 0.065                | 2.27                                      | 89.66                         | 0.31   | 9.697  | 0.392                             | 7.281   | 9.534           | 9.737  | 9.946           | 10.52                   |         |
| MGMT     | fnpYB4s7kso6O.iYRE | rs511770   | 4.58                                          | 4.38                                                   | 0.092                | 1.84                                      | 95.76                         | 0.3788 | 9.697  | 0.392                             | 7.281   | 9.534           | 9.737  | 9.946           | 10.52                   |         |
| MGMT     | fnpYB4s7kso6O.iYRE | rs574831   | 4.11                                          | 3.93                                                   | 0.081                | 1.39                                      | 113.72                        | 0.47   | 9.697  | 0.392                             | 7.281   | 9.534           | 9.737  | 9.946           | 10.52                   |         |
| MGMT     | fnpYB4s7kso6O.iYRE | rs471390   | 6.59                                          | 6.30                                                   | -0.133               | 3.51                                      | 117.36                        | 0.485  | 9.697  | 0.392                             | 7.281   | 9.534           | 9.737  | 9.946           | 10.52                   |         |
| MGMT     | fnpYB4s7kso6O.iYRE | rs551491   | 3.81                                          | 3.65                                                   | -0.074               | 1.3                                       | 132.35                        | 0.47   | 9.697  | 0.392                             | 7.281   | 9.534           | 9.737  | 9.946           | 10.52                   |         |
| MGMT     | fnpYB4s7kso6O.iYRE | rs4751104  | 4.23                                          | 4.05                                                   | 0.084                | 1.55                                      | 139.89                        | 0.34   | 9.697  | 0.392                             | 7.281   | 9.534           | 9.737  | 9.946           | 10.52                   |         |
| MGMT     | fnpYB4s7kso6O.iYRE | rs553371   | 7.7                                           | 7.35                                                   | -0.155               | 3.58                                      | 148.21                        | 0.4925 | 9.697  | 0.392                             | 7.281   | 9.534           | 9.737  | 9.946           | 10.52                   |         |
| MGMT     | fnpYB4s7kso6O.iYRE | rs567700   | 7.18                                          | 6.86                                                   | 0.149                | 3.42                                      | -142.24                       | 0.4974 | 9.697  | 0.392                             | 7.281   | 9.534           | 9.737  | 9.946           | 10.52                   |         |
| MGMT     | fnpYB4s7kso6O.iYRE | rs531572   | 8.82                                          | 8.42                                                   | 0.178                | 4.2                                       | -137.8                        | 0.475  | 9.697  | 0.392                             | 7.281   | 9.534           | 9.737  | 9.946           | 10.52                   |         |
| MGMT     | fnpYB4s7kso6O.iYRE | rs4751107  | 4.39                                          | 4.20                                                   | -0.088               | 3.02                                      | -137.71                       | 0.2575 | 9.697  | 0.392                             | 7.281   | 9.534           | 9.737  | 9.946           | 10.52                   |         |
| MGMT     | fnpYB4s7kso6O.iYRE | rs12247354 | 4.16                                          | 3.98                                                   | -0.083               | 1.94                                      | -128.81                       | 0.285  | 9.697  | 0.392                             | 7.281   | 9.534           | 9.737  | 9.946           | 10.52                   |         |
| MGMT     | fnpYB4s7kso6O.iYRE | rs4750759  | 7.54                                          | 7.20                                                   | 0.152                | 3.67                                      | -128.76                       | 0.4925 | 9.697  | 0.392                             | 7.281   | 9.534           | 9.737  | 9.946           | 10.52                   |         |
| MGMT     | fnpYB4s7kso6O.iYRE | rs6482743  | 3.35                                          | 3.21                                                   | -0.063               | 1.5                                       | -108.19                       | 0.3675 | 9.697  | 0.392                             | 7.281   | 9.534           | 9.737  | 9.946           | 10.52                   |         |
| MGMT     | fnpYB4s7kso6O.iYRE | rs9971190  | 5.54                                          | 5.30                                                   | 0.111                | 3.65                                      | -104.05                       | 0.3825 | 9.697  | 0.392                             | 7.281   | 9.534           | 9.737  | 9.946           | 10.52                   |         |
| MGMT     | fnpYB4s7kso6O.iYRE | rs7082319  | 3.93                                          | 3.76                                                   | -0.076               | 2.4                                       | -101.47                       | 0.4125 | 9.697  | 0.392                             | 7.281   | 9.534           | 9.737  | 9.946           | 10.52                   |         |
| MGST2    | Eo0Wv1h4t6o.6X74V0 | rs2602238  | 4.62                                          | 4.42                                                   | -0.088               | 3.62                                      | 6.39                          | 0.4875 | 9.346  | 0.596                             | 8.017   | 8.905           | 9.267  | 9.646           | 11.061                  |         |
| MGST2    | Eo0Wv1h4t6o.6X74V0 | rs8192047  | 5.01                                          | 4.79                                                   | -0.099               | 3.34                                      | 9.78                          | 0.2814 | 9.346  | 0.596                             | 8.017   | 8.905           | 9.267  | 9.646           | 11.061                  |         |
| MGST3    | xWbMn3pep_i6PvoYyc | rs1337444  | 8.67                                          | 8.28                                                   | -0.17                | 4.53                                      | -10.91                        | 0.44   | 10.788 | 0.272                             | 9.737   | 10.624          | 10.807 | 10.984          | 11.611                  |         |
| MGST3    | xWbMn3pep_i6PvoYyc | rs4147591  | 6.89                                          | 6.59                                                   | -0.139               | 2.75                                      | -0.47                         | 0.255  | 10.788 | 0.272                             | 9.737   | 10.624          | 10.807 | 10.984          | 11.611                  |         |
| MGST3    | xWbMn3pep_i6PvoYyc | rs4147592  | 14.66                                         | 13.98                                                  | 0.277                | 5.23                                      | -0.3                          | 0.4975 | 10.788 | 0.272                             | 9.737   | 10.624          | 10.807 | 10.984          | 11.611                  |         |
| MGST3    | xWbMn3pep_i6PvoYyc | rs9333378  | 7.43                                          | 7.09                                                   | 0.146                | 2.56                                      | 1.02                          | 0.3825 | 10.788 | 0.272                             | 9.737   | 10.624          | 10.807 | 10.984          | 11.611                  |         |
| MGST3    | xWbMn3pep_i6PvoYyc | rs7554034  | 7.45                                          | 7.12                                                   | -0.148               | 2.24                                      | 10.01                         | 0.2075 | 10.788 | 0.272                             | 9.737   | 10.624          | 10.807 | 10.984          | 11.611                  |         |
| MGST3    | xWbMn3pep_i6PvoYyc | rs6686643  | 6.57                                          | 6.28                                                   | -0.132               | 2.64                                      | -8.27                         | 0.2525 | 10.788 | 0.272                             | 9.737   | 10.624          | 10.807 | 10.984          | 11.611                  |         |
| MGST3    | xWbMn3pep_i6PvoYyc | rs1878076  | 11.02                                         | 10.52                                                  | -0.215               | 8.18                                      | -7.54                         | 0.4    | 10.788 | 0.272                             | 9.737   | 10.624          | 10.807 | 10.984          | 11.611                  |         |
| MICA     | QS_oYuFEqOURJ2j9Jc | rs2523554  | 3.34                                          | 3.20                                                   | 0.063                | 0.95                                      | -39.54                        | 0.405  | 9.719  | 0.371                             | 8.687   | 9.471           | 9.729  | 9.939           | 10.914                  | Yes     |
| MICA     | QS_oYuFEqOURJ2j9Jc | rs9266395  | 3.75                                          | 3.59                                                   | 0.069                | 0.84                                      | -35.8                         | 0.1975 | 9.719  | 0.371                             | 8.687   | 9.471           | 9.729  | 9.939           | 10.914                  | Yes     |
| MICA     | QS_oYuFEqOURJ2j9Jc | rs9266409  | 3.75                                          | 3.59                                                   | -0.069               | 0.9                                       | -34.8                         | 0.1975 | 9.719  | 0.371                             | 8.687   | 9.471           | 9.729  | 9.939           | 10.914                  | Yes     |
| MICA     | QS_oYuFEqOURJ2j9Jc | rs7770216  | 3.81                                          | 3.65                                                   | 0.071                | 0.69                                      | -30.76                        | 0.2045 | 9.719  | 0.371                             | 8.687   | 9.471           | 9.729  | 9.939           | 10.914                  | Yes     |
| MICA     | QS_oYuFEqOURJ2j9Jc | rs6933050  | 3.69                                          | 3.53                                                   | -0.068               | 0.9                                       | -27.74                        | 0.196  | 9.719  | 0.371                             | 8.687   | 9.471           | 9.729  | 9.939           | 10.914                  | Yes     |
| MICA     | QS_oYuFEqOURJ2j9Jc | rs9266722  | 3.99                                          | 3.82                                                   | 0.075                | 0.76                                      | -21.45                        | 0.1025 | 9.719  | 0.371                             | 8.687   | 9.471           | 9.729  | 9.939           | 10.914                  | Yes     |
| MICA     | QS_oYuFEqOURJ2j9Jc | rs1131896  | 6.77                                          | 6.47                                                   | -0.131               | 2.7                                       | -3.98                         | 0.2588 | 9.719  | 0.371                             | 8.687   | 9.471           | 9.729  | 9.939           | 10.914                  | Yes     |
| MICA     | QS_oYuFEqOURJ2j9Jc | rs2596531  | 4.05                                          | 3.88                                                   | 0.076                | 0.49                                      | 4.47                          | 0.48   | 9.719  | 0.371                             | 8.687   | 9.471           | 9.729  | 9.939           | 10.914                  | Yes     |
| MICA     | QS_oYuFEqOURJ2j9Jc | rs2844511  | 4.24                                          | 4.06                                                   | 0.08                 | 0.49                                      | 6.69                          | 0.4825 | 9.719  | 0.371                             | 8.687   | 9.471           | 9.729  | 9.939           | 10.914                  | Yes     |
| MICA     | QS_oYuFEqOURJ2j9Jc | rs2516448  | 4.24                                          | 4.06                                                   | -0.08                | 0.49                                      | 7.32                          | 0.4825 | 9.719  | 0.371                             | 8.687   | 9.471           | 9.729  | 9.939           | 10.914                  | Yes     |
| MICA     | QS_oYuFEqOURJ2j9Jc | rs2524279  | 3.53                                          | 3.38                                                   | 0.065                | 1.22                                      | 9.82                          | 0.0779 | 9.719  | 0.371                             | 8.687   | 9.471           | 9.729  | 9.939           | 10.914                  | Yes     |
| MICB     | HhSf37Rfiv2VbRFVM  | rs3132468  | 3.6                                           | 3.45                                                   | 0.069                | 1.45                                      | -3.42                         | 0.27   | 9.633  | 0.337                             | 8.761   | 9.405           | 9.615  | 9.838           | 10.717                  |         |

| Symbol   | Lumi nuID          | SNP        | Population-based association |                           |                      | Family-based association |                               |        | Transcript abundance (log2 scale) |                    |         |                 |        |                 | SNP mapping under probe |         |
|----------|--------------------|------------|------------------------------|---------------------------|----------------------|--------------------------|-------------------------------|--------|-----------------------------------|--------------------|---------|-----------------|--------|-----------------|-------------------------|---------|
|          |                    |            | p-value (-log10)             | p-value (-log10), GC adv. | % Variance Explained | p-value (-log10)         | Distance from transcript (kb) | MAF    | Mean                              | Standard Deviation | Minimum | 25th percentile | Median | 75th percentile |                         | Maximum |
| MICB     | HhSf37RftV2vbRFV   | rs4947324  | 4.41                         | 4.22                      | -0.088               | 3.45                     | 49.23                         | 0.0758 | 9.633                             | 0.337              | 8.761   | 9.405           | 9.615  | 9.838           | 10.717                  |         |
| MIZF     | xqiXih3o9.iqNeju7s | rs641382   | 5.84                         | 5.58                      | 0.111                | 2.7                      | 0.54                          | 0.39   | 9.165                             | 0.184              | 8.721   | 9.047           | 9.152  | 9.272           | 9.705                   |         |
| MIZF     | xqiXih3o9.iqNeju7s | rs671872   | 3.89                         | 3.72                      | -0.072               | 2.44                     | 10.41                         | 0.4775 | 9.165                             | 0.184              | 8.721   | 9.047           | 9.152  | 9.272           | 9.705                   |         |
| MIZF     | xqiXih3o9.iqNeju7s | rs4301800  | 3.89                         | 3.72                      | 0.072                | 2.44                     | 13.76                         | 0.4775 | 9.165                             | 0.184              | 8.721   | 9.047           | 9.152  | 9.272           | 9.705                   |         |
| MIZF     | xqiXih3o9.iqNeju7s | rs668033   | 3.87                         | 3.70                      | -0.073               | 2.42                     | 17.34                         | 0.4772 | 9.165                             | 0.184              | 8.721   | 9.047           | 9.152  | 9.272           | 9.705                   |         |
| MKRN1    | NHao516.tTcef49fo  | rs11765962 | 3.72                         | 3.56                      | -0.069               | 2.7                      | -26.34                        | 0.1375 | 12.141                            | 0.212              | 11.54   | 12.018          | 12.123 | 12.234          | 13.01                   | Yes     |
| MLF1IP   | ES97kTH.Qx1WGgiQq4 | rs2696051  | 4.77                         | 4.57                      | 0.101                | 2.1                      | -10.46                        | 0.235  | 7.4                               | 0.126              | 7.194   | 7.32            | 7.372  | 7.44            | 7.913                   |         |
| MLF1IP   | ES97kTH.Qx1WGgiQq4 | rs2130392  | 7.88                         | 7.52                      | -0.171               | 3.06                     | -16.12                        | 0.3025 | 7.4                               | 0.126              | 7.194   | 7.32            | 7.372  | 7.44            | 7.913                   |         |
| MLF1IP   | ES97kTH.Qx1WGgiQq4 | rs902176   | 3.47                         | 3.32                      | -0.068               | 0.81                     | -0.93                         | 0.1575 | 7.4                               | 0.126              | 7.194   | 7.32            | 7.372  | 7.44            | 7.913                   |         |
| MLF1IP   | ES97kTH.Qx1WGgiQq4 | rs6851816  | 4.24                         | 4.06                      | 0.084                | 0.28                     | -0.45                         | 0.1825 | 7.4                               | 0.126              | 7.194   | 7.32            | 7.372  | 7.44            | 7.913                   |         |
| MLF1IP   | ES97kTH.Qx1WGgiQq4 | rs902174   | 5.54                         | 5.30                      | -0.113               | 0.41                     | -0.12                         | 0.2411 | 7.4                               | 0.126              | 7.194   | 7.32            | 7.372  | 7.44            | 7.913                   |         |
| MLF1IP   | ES97kTH.Qx1WGgiQq4 | rs755535   | 5.82                         | 5.56                      | 0.122                | 1.37                     | 13.09                         | 0.35   | 7.4                               | 0.126              | 7.194   | 7.32            | 7.372  | 7.44            | 7.913                   |         |
| MLH3     | cKeVUq.eR61Xf9X0t8 | rs174994   | 7.72                         | 7.37                      | -0.147               | 3.89                     | -49.2                         | 0.4899 | 7.226                             | 0.082              | 7.107   | 7.164           | 7.213  | 7.264           | 7.664                   |         |
| MLH3     | cKeVUq.eR61Xf9X0t8 | rs175057   | 9.69                         | 9.25                      | -0.185               | 3.79                     | 6.33                          | 0.4698 | 7.226                             | 0.082              | 7.107   | 7.164           | 7.213  | 7.264           | 7.664                   |         |
| MLH3     | cKeVUq.eR61Xf9X0t8 | rs175505   | 7.16                         | 6.84                      | -0.136               | 2.54                     | 11.49                         | 0.4825 | 7.226                             | 0.082              | 7.107   | 7.164           | 7.213  | 7.264           | 7.664                   |         |
| MLH3     | cKeVUq.eR61Xf9X0t8 | rs12431669 | 3.55                         | 3.40                      | -0.067               | 1.96                     | 28.1                          | 0.255  | 7.226                             | 0.082              | 7.107   | 7.164           | 7.213  | 7.264           | 7.664                   |         |
| MLKL     | HSVilzFpxFPSCReB1E | rs9932977  | 10.13                        | 9.67                      | -0.194               | 1.59                     | 0.36                          | 0.4749 | 8.226                             | 0.335              | 7.138   | 8.062           | 8.222  | 8.438           | 9.346                   |         |
| MLKL     | HSVilzFpxFPSCReB1E | rs2057803  | 6.51                         | 6.22                      | 0.124                | 2.71                     | 0.65                          | 0.265  | 8.226                             | 0.335              | 7.138   | 8.062           | 8.222  | 8.438           | 9.346                   |         |
| MLKL     | HSVilzFpxFPSCReB1E | rs2097840  | 4.93                         | 4.72                      | 0.092                | 2.66                     | 1.33                          | 0.407  | 8.226                             | 0.335              | 7.138   | 8.062           | 8.222  | 8.438           | 9.346                   |         |
| MME      | Ki311OeS72Lo_yuQjo | rs1025192  | 3.39                         | 3.25                      | 0.062                | 1.87                     | 29.73                         | 0.4975 | 7.303                             | 0.149              | 7.114   | 7.214           | 7.258  | 7.342           | 8.28                    |         |
| MME      | Ki311OeS72Lo_yuQjo | rs2016848  | 3.57                         | 3.42                      | -0.067               | 2.17                     | -42.81                        | 0.3869 | 7.303                             | 0.149              | 7.114   | 7.214           | 7.258  | 7.342           | 8.28                    |         |
| MME      | Ki311OeS72Lo_yuQjo | rs1836917  | 3.52                         | 3.37                      | 0.065                | 2.33                     | -40.58                        | 0.3875 | 7.303                             | 0.149              | 7.114   | 7.214           | 7.258  | 7.342           | 8.28                    |         |
| MMEL1    | x99NBzISu65q1xaVi8 | rs734999   | 3.52                         | 3.37                      | -0.055               | 2.9                      | -8.87                         | 0.4625 | 7.307                             | 0.159              | 7.106   | 7.184           | 7.278  | 7.385           | 8.143                   |         |
| MMEL1    | x99NBzISu65q1xaVi8 | rs3748816  | 5.29                         | 5.05                      | -0.084               | 3.26                     | 4.66                          | 0.3425 | 7.307                             | 0.159              | 7.106   | 7.184           | 7.278  | 7.385           | 8.143                   |         |
| MMEL1    | x99NBzISu65q1xaVi8 | rs12138909 | 3.84                         | 3.68                      | -0.061               | 2.02                     | 16.66                         | 0.1352 | 7.307                             | 0.159              | 7.106   | 7.184           | 7.278  | 7.385           | 8.143                   |         |
| MMEL1    | x99NBzISu65q1xaVi8 | rs3890745  | 6.15                         | 5.88                      | 0.098                | 3.15                     | -10.8                         | 0.315  | 7.307                             | 0.159              | 7.106   | 7.184           | 7.278  | 7.385           | 8.143                   |         |
| MMP16    | rpqn5dcs2OS.OAMmGo | rs1477917  | 3.42                         | 3.27                      | -0.068               | 1.44                     | 51.26                         | 0.095  | 7.146                             | 0.036              | 7.097   | 7.116           | 7.138  | 7.165           | 7.27                    |         |
| MMP7     | 3nR9jijgZ6GjrJLcqM | rs2156528  | 5.17                         | 4.94                      | 0.101                | 0.43                     | 1.42                          | 0.1875 | 7.111                             | 0.016              | 7.096   | 7.103           | 7.108  | 7.114           | 7.248                   |         |
| MMP7     | 3nR9jijgZ6GjrJLcqM | rs10502001 | 5.56                         | 5.32                      | 0.111                | 0.55                     | -2.88                         | 0.1919 | 7.111                             | 0.016              | 7.096   | 7.103           | 7.108  | 7.114           | 7.248                   |         |
| MMRN1    | WTKniko.oNKU7fdSJJ | rs10516848 | 6.81                         | 6.50                      | -0.136               | 1.73                     | -40.84                        | 0.3775 | 7.277                             | 0.147              | 7.105   | 7.17            | 7.231  | 7.347           | 8.023                   |         |
| MMRN1    | WTKniko.oNKU7fdSJJ | rs2736994  | 4.72                         | 4.52                      | -0.09                | 1.96                     | -31.52                        | 0.2462 | 7.277                             | 0.147              | 7.105   | 7.17            | 7.231  | 7.347           | 8.023                   |         |
| MMRN1    | WTKniko.oNKU7fdSJJ | rs11097239 | 5.54                         | 5.29                      | 0.108                | 0.59                     | -20.25                        | 0.3543 | 7.277                             | 0.147              | 7.105   | 7.17            | 7.231  | 7.347           | 8.023                   |         |
| MMRN1    | WTKniko.oNKU7fdSJJ | rs1899389  | 9.8                          | 9.36                      | 0.197                | 2.96                     | -13.05                        | 0.4925 | 7.277                             | 0.147              | 7.105   | 7.17            | 7.231  | 7.347           | 8.023                   |         |
| MMRN1    | WTKniko.oNKU7fdSJJ | rs3775479  | 6.03                         | 5.76                      | -0.114               | 1.35                     | 26.92                         | 0.4575 | 7.277                             | 0.147              | 7.105   | 7.17            | 7.231  | 7.347           | 8.023                   |         |
| MMRN1    | WTKniko.oNKU7fdSJJ | rs1442129  | 9.04                         | 8.63                      | -0.175               | 2.15                     | -26.33                        | 0.4725 | 7.277                             | 0.147              | 7.105   | 7.17            | 7.231  | 7.347           | 8.023                   |         |
| MMRN1    | WTKniko.oNKU7fdSJJ | rs6854896  | 3.93                         | 3.77                      | -0.073               | 1.19                     | -4.22                         | 0.3175 | 7.277                             | 0.147              | 7.105   | 7.17            | 7.231  | 7.347           | 8.023                   |         |
| MMRN1    | WTKniko.oNKU7fdSJJ | rs1318557  | 3.83                         | 3.66                      | -0.07                | 0.86                     | 3.83                          | 0.3825 | 7.277                             | 0.147              | 7.105   | 7.17            | 7.231  | 7.347           | 8.023                   |         |
| MMRN1    | WTKniko.oNKU7fdSJJ | rs11931138 | 3.56                         | 3.41                      | -0.064               | 1.08                     | 7.27                          | 0.4045 | 7.277                             | 0.147              | 7.105   | 7.17            | 7.231  | 7.347           | 8.023                   |         |
| MOAP1    | WuS53iqEhCn6uzOUFI | rs17128905 | 3.39                         | 3.25                      | 0.063                | 0.22                     | -25.91                        | 0.38   | 10.542                            | 0.243              | 9.817   | 10.406          | 10.527 | 10.686          | 11.272                  |         |
| MORN3    | 0U9eK0A1yFeOu56aKU | rs12320939 | 7.17                         | 6.85                      | 0.146                | 3.67                     | -26.57                        | 0.3925 | 7.663                             | 0.287              | 7.142   | 7.437           | 7.63   | 7.864           | 8.675                   |         |
| MORN3    | 0U9eK0A1yFeOu56aKU | rs12313273 | 7.75                         | 7.40                      | -0.165               | 1.98                     | -26.28                        | 0.1575 | 7.663                             | 0.287              | 7.142   | 7.437           | 7.63   | 7.864           | 8.675                   |         |
| MORN3    | 0U9eK0A1yFeOu56aKU | rs7135617  | 7.44                         | 7.11                      | -0.154               | 4.23                     | -20.29                        | 0.404  | 7.663                             | 0.287              | 7.142   | 7.437           | 7.63   | 7.864           | 8.675                   |         |
| MORN3    | 0U9eK0A1yFeOu56aKU | rs6486795  | 7.02                         | 6.71                      | -0.152               | 2.03                     | -13.38                        | 0.1859 | 7.663                             | 0.287              | 7.142   | 7.437           | 7.63   | 7.864           | 8.675                   |         |
| MORN3    | 0U9eK0A1yFeOu56aKU | rs3741595  | 6.93                         | 6.62                      | 0.146                | 1.54                     | -10.1                         | 0.13   | 7.663                             | 0.287              | 7.142   | 7.437           | 7.63   | 7.864           | 8.675                   |         |
| MORN3    | 0U9eK0A1yFeOu56aKU | rs2942368  | 7.57                         | 7.23                      | 0.155                | 4.78                     | 9.23                          | 0.395  | 7.663                             | 0.287              | 7.142   | 7.437           | 7.63   | 7.864           | 8.675                   |         |
| MORN3    | 0U9eK0A1yFeOu56aKU | rs2466145  | 3.74                         | 3.58                      | 0.072                | 2.56                     | 42.82                         | 0.3475 | 7.663                             | 0.287              | 7.142   | 7.437           | 7.63   | 7.864           | 8.675                   |         |
| MORN3    | 0U9eK0A1yFeOu56aKU | rs925531   | 3.74                         | 3.58                      | -0.072               | 2.6                      | 45.75                         | 0.3475 | 7.663                             | 0.287              | 7.142   | 7.437           | 7.63   | 7.864           | 8.675                   |         |
| MORN3    | 0U9eK0A1yFeOu56aKU | rs2137434  | 3.74                         | 3.58                      | -0.072               | 2.56                     | 45.94                         | 0.3475 | 7.663                             | 0.287              | 7.142   | 7.437           | 7.63   | 7.864           | 8.675                   |         |
| IPHOSPH6 | iiUo8l6OXwmOISq5_s | rs4243230  | 4.26                         | 4.08                      | 0.085                | 1.38                     | -28.91                        | 0.37   | 9.011                             | 0.287              | 8.313   | 8.829           | 8.981  | 9.192           | 10.053                  |         |
| IPHOSPH6 | iiUo8l6OXwmOISq5_s | rs6564982  | 4.7                          | 4.50                      | -0.095               | 1.63                     | -14.58                        | 0.205  | 9.011                             | 0.287              | 8.313   | 8.829           | 8.981  | 9.192           | 10.053                  |         |
| IPHOSPH6 | iiUo8l6OXwmOISq5_s | rs4889467  | 5.87                         | 5.61                      | -0.12                | 1.63                     | -12.39                        | 0.325  | 9.011                             | 0.287              | 8.313   | 8.829           | 8.981  | 9.192           | 10.053                  |         |
| IPHOSPH6 | iiUo8l6OXwmOISq5_s | rs7203990  | 4.33                         | 4.14                      | -0.087               | 1.51                     | 3.55                          | 0.2035 | 9.011                             | 0.287              | 8.313   | 8.829           | 8.981  | 9.192           | 10.053                  |         |
| IPHOSPH6 | iiUo8l6OXwmOISq5_s | rs12102917 | 6.29                         | 6.01                      | 0.126                | 2.19                     | -7                            | 0.255  | 9.011                             | 0.287              | 8.313   | 8.829           | 8.981  | 9.192           | 10.053                  |         |
| IPHOSPH6 | iiUo8l6OXwmOISq5_s | rs12598637 | 7.98                         | 7.62                      | -0.162               | 2.05                     | -6.92                         | 0.3744 | 9.011                             | 0.287              | 8.313   | 8.829           | 8.981  | 9.192           | 10.053                  |         |
| IPHOSPH6 | iiUo8l6OXwmOISq5_s | rs2303266  | 8.58                         | 8.19                      | 0.173                | 1.99                     | -5.93                         | 0.3775 | 9.011                             | 0.287              | 8.313   | 8.829           | 8.981  | 9.192           | 10.053                  |         |
| IPHOSPH6 | iiUo8l6OXwmOISq5_s | rs7205534  | 6.77                         | 6.47                      | 0.136                | 2.12                     | -2.19                         | 0.2475 | 9.011                             | 0.287              | 8.313   | 8.829           | 8.981  | 9.192           | 10.053                  |         |
| IPHOSPH6 | iiUo8l6OXwmOISq5_s | rs2303262  | 4.44                         | 4.25                      | -0.089               | 1.23                     | -0.05                         | 0.1985 | 9.011                             | 0.287              | 8.313   | 8.829           | 8.981  | 9.192           | 10.053                  |         |
| IPHOSPH6 | iiUo8l6OXwmOISq5_s | rs2967379  | 4.27                         | 4.08                      | -0.084               | 1.32                     | 9.5                           | 0.39   | 9.011                             | 0.287              | 8.313   | 8.829           | 8.981  | 9.192           | 10.053                  |         |
| IPHOSPH6 | iiUo8l6OXwmOISq5_s | rs918759   | 6.09                         | 5.82                      | 0.122                | 1.81                     | 12.7                          | 0.4425 | 9.011                             | 0.287              | 8.313   | 8.829           | 8.981  | 9.192           | 10.053                  |         |
| IPHOSPH6 | iiUo8l6OXwmOISq5_s | rs918760   | 4.26                         | 4.07                      | -0.084               | 1.75                     | 12.81                         | 0.385  | 9.011                             | 0.287              | 8.313   | 8.829           | 8.981  | 9.192           | 10.053                  |         |
| IPHOSPH9 | 0KFI_KSRwko5fdeihg | rs1727302  | 3.52                         | 3.37                      | 0.07                 | 0.77                     | -8.02                         | 0.24   | 8.392                             | 0.173              | 7.864   | 8.276           | 8.386  | 8.515           | 9.117                   |         |
| MPP2     | Bi4oVxTUe1M9LVJVLk | rs231487   | 4.21                         | 4.03                      | -0.083               | 2.5                      | -3.81                         | 0.3525 | 7.161                             | 0.049              | 7.103   | 7.129           | 7.148  | 7.183           | 7.424                   |         |

| Symbol | Lumi nuID          | SNP        | Population-based association |                           |                      | Family-based association |                               |        | Transcript abundance (log2 scale) |                    |         |                 |        |                 | SNP mapping under probe |         |
|--------|--------------------|------------|------------------------------|---------------------------|----------------------|--------------------------|-------------------------------|--------|-----------------------------------|--------------------|---------|-----------------|--------|-----------------|-------------------------|---------|
|        |                    |            | p-value (-log10)             | p-value (-log10), GC adj. | % Variance Explained | p-value (-log10)         | Distance from transcript (kb) | MAF    | Mean                              | Standard Deviation | Minimum | 25th percentile | Median | 75th percentile |                         | Maximum |
| MPP2   | Bi4oVxTUE1M9LVJVLk | rs231486   | 4.1                          | 3.93                      | -0.083               | 2.47                     | -3.71                         | 0.3462 | 7.161                             | 0.049              | 7.103   | 7.129           | 7.148  | 7.183           | 7.424                   |         |
| MPP2   | Bi4oVxTUE1M9LVJVLk | rs231485   | 4.21                         | 4.03                      | -0.083               | 2.5                      | -3.1                          | 0.3525 | 7.161                             | 0.049              | 7.103   | 7.129           | 7.148  | 7.183           | 7.424                   |         |
| MPP2   | Bi4oVxTUE1M9LVJVLk | rs105025   | 4.28                         | 4.10                      | -0.084               | 2.51                     | 2.33                          | 0.3525 | 7.161                             | 0.049              | 7.103   | 7.129           | 7.148  | 7.183           | 7.424                   |         |
| MPP2   | Bi4oVxTUE1M9LVJVLk | rs1731898  | 3.46                         | 3.31                      | -0.067               | 0.77                     | 23.75                         | 0.4175 | 7.161                             | 0.049              | 7.103   | 7.129           | 7.148  | 7.183           | 7.424                   |         |
| MPPE1  | N20dE5GETfvUoKI64  | rs647651   | 14.62                        | 13.94                     | -0.293               | 3.73                     | 2.08                          | 0.0875 | 10.401                            | 0.399              | 8.556   | 10.155          | 10.444 | 10.684          | 11.881                  |         |
| MPPE1  | N20dE5GETfvUoKI64  | rs9951817  | 22.92                        | 21.84                     | 0.413                | 4.61                     | 3.92                          | 0.0675 | 10.401                            | 0.399              | 8.556   | 10.155          | 10.444 | 10.684          | 11.881                  |         |
| MPPE1  | N20dE5GETfvUoKI64  | rs593713   | 4.93                         | 4.71                      | 0.095                | 1.77                     | 4.19                          | 0.275  | 10.401                            | 0.399              | 8.556   | 10.155          | 10.444 | 10.684          | 11.881                  |         |
| MPPE1  | N20dE5GETfvUoKI64  | rs605961   | 5.61                         | 5.36                      | -0.11                | 1.64                     | 4.62                          | 0.2663 | 10.401                            | 0.399              | 8.556   | 10.155          | 10.444 | 10.684          | 11.881                  |         |
| MPPE1  | N20dE5GETfvUoKI64  | rs6650615  | 13.83                        | 13.19                     | -0.263               | 4.4                      | 9.85                          | 0.095  | 10.401                            | 0.399              | 8.556   | 10.155          | 10.444 | 10.684          | 11.881                  |         |
| MPPE1  | N20dE5GETfvUoKI64  | rs8094168  | 6.6                          | 6.31                      | -0.13                | 3.37                     | -8.9                          | 0.1525 | 10.401                            | 0.399              | 8.556   | 10.155          | 10.444 | 10.684          | 11.881                  |         |
| MPPED2 | 0Xdv3VP_R7u2OQ32ck | rs576063   | 3.6                          | 3.44                      | -0.067               | 1.24                     | 59.98                         | 0.0581 | 7.324                             | 0.188              | 7.126   | 7.198           | 7.261  | 7.395           | 8.236                   |         |
| MPPED2 | 0Xdv3VP_R7u2OQ32ck | rs473481   | 4.56                         | 4.36                      | -0.086               | 1.43                     | -59.01                        | 0.06   | 7.324                             | 0.188              | 7.126   | 7.198           | 7.261  | 7.395           | 8.236                   |         |
| MPPED2 | 0Xdv3VP_R7u2OQ32ck | rs521069   | 7.6                          | 7.26                      | -0.142               | 3.06                     | -22.55                        | 0.425  | 7.324                             | 0.188              | 7.126   | 7.198           | 7.261  | 7.395           | 8.236                   |         |
| MPPED2 | 0Xdv3VP_R7u2OQ32ck | rs3824982  | 16.24                        | 15.48                     | 0.293                | 3.05                     | -2.29                         | 0.2625 | 7.324                             | 0.188              | 7.126   | 7.198           | 7.261  | 7.395           | 8.236                   |         |
| MPPED2 | 0Xdv3VP_R7u2OQ32ck | rs3781852  | 18.17                        | 17.31                     | 0.325                | 4.37                     | -1.66                         | 0.2803 | 7.324                             | 0.188              | 7.126   | 7.198           | 7.261  | 7.395           | 8.236                   |         |
| MPPED2 | 0Xdv3VP_R7u2OQ32ck | rs2045528  | 8.82                         | 8.42                      | -0.164               | 2.14                     | 0.27                          | 0.3975 | 7.324                             | 0.188              | 7.126   | 7.198           | 7.261  | 7.395           | 8.236                   |         |
| MPPED2 | 0Xdv3VP_R7u2OQ32ck | rs7119684  | 15.31                        | 14.60                     | 0.274                | 4.05                     | 11.79                         | 0.26   | 7.324                             | 0.188              | 7.126   | 7.198           | 7.261  | 7.395           | 8.236                   |         |
| MPPED2 | 0Xdv3VP_R7u2OQ32ck | rs1374612  | 3.64                         | 3.48                      | -0.064               | 1.84                     | 16.78                         | 0.33   | 7.324                             | 0.188              | 7.126   | 7.198           | 7.261  | 7.395           | 8.236                   |         |
| MPPED2 | 0Xdv3VP_R7u2OQ32ck | rs2593549  | 7.39                         | 7.06                      | -0.137               | 3.24                     | 23.32                         | 0.4874 | 7.324                             | 0.188              | 7.126   | 7.198           | 7.261  | 7.395           | 8.236                   |         |
| MPZL2  | WpwMtCqzwqXvvy7dfU | rs1624780  | 3.72                         | 3.56                      | -0.069               | 0.37                     | -0.22                         | 0.4375 | 7.776                             | 0.42               | 7.1     | 7.439           | 7.729  | 8.036           | 9.005                   |         |
| MPZL2  | WpwMtCqzwqXvvy7dfU | rs2853009  | 3.55                         | 3.40                      | -0.065               | 0.5                      | 13.14                         | 0.4497 | 7.776                             | 0.42               | 7.1     | 7.439           | 7.729  | 8.036           | 9.005                   |         |
| MR1    | ZJ7d6tT7X7T7np6L64 | rs10797666 | 5.59                         | 5.34                      | -0.11                | 3.09                     | -5.83                         | 0.2775 | 9.001                             | 0.295              | 8.036   | 8.827           | 9.001  | 9.199           | 9.835                   | Yes     |
| MR1    | ZJ7d6tT7X7T7np6L64 | rs3747956  | 5.5                          | 5.26                      | 0.108                | 2.81                     | -0.23                         | 0.295  | 9.001                             | 0.295              | 8.036   | 8.827           | 9.001  | 9.199           | 9.835                   | Yes     |
| MR1    | ZJ7d6tT7X7T7np6L64 | rs16856699 | 4.88                         | 4.67                      | 0.097                | 1.43                     | 0.48                          | 0.185  | 9.001                             | 0.295              | 8.036   | 8.827           | 9.001  | 9.199           | 9.835                   | Yes     |
| MRE11A | rreiH3FbJKB0CHnu0k | rs2508678  | 3.83                         | 3.66                      | 0.077                | 1.7                      | -1.12                         | 0.445  | 8.021                             | 0.215              | 7.195   | 7.922           | 8.033  | 8.173           | 8.515                   |         |
| MRE11A | rreiH3FbJKB0CHnu0k | rs598599   | 7.04                         | 6.73                      | -0.144               | 3.05                     | 16.69                         | 0.3575 | 8.021                             | 0.215              | 7.195   | 7.922           | 8.033  | 8.173           | 8.515                   |         |
| MRE11A | rreiH3FbJKB0CHnu0k | rs529126   | 9.05                         | 8.64                      | 0.188                | 3.3                      | -32.74                        | 0.3375 | 8.021                             | 0.215              | 7.195   | 7.922           | 8.033  | 8.173           | 8.515                   |         |
| MRE11A | rreiH3FbJKB0CHnu0k | rs535801   | 11.62                        | 11.08                     | 0.237                | 3.81                     | -14.99                        | 0.375  | 8.021                             | 0.215              | 7.195   | 7.922           | 8.033  | 8.173           | 8.515                   |         |
| MRE11A | rreiH3FbJKB0CHnu0k | rs1270146  | 6.06                         | 5.79                      | -0.124               | 2.88                     | -11.73                        | 0.49   | 8.021                             | 0.215              | 7.195   | 7.922           | 8.033  | 8.173           | 8.515                   |         |
| MRE11A | rreiH3FbJKB0CHnu0k | rs509723   | 7.86                         | 7.50                      | 0.162                | 2.97                     | 21.54                         | 0.415  | 8.021                             | 0.215              | 7.195   | 7.922           | 8.033  | 8.173           | 8.515                   |         |
| MRE11A | rreiH3FbJKB0CHnu0k | rs628728   | 5.83                         | 5.57                      | 0.119                | 2.4                      | 23.34                         | 0.4925 | 8.021                             | 0.215              | 7.195   | 7.922           | 8.033  | 8.173           | 8.515                   |         |
| MRE11A | rreiH3FbJKB0CHnu0k | rs525057   | 5.83                         | 5.57                      | 0.119                | 2.4                      | 26.13                         | 0.4925 | 8.021                             | 0.215              | 7.195   | 7.922           | 8.033  | 8.173           | 8.515                   |         |
| MRE11A | rreiH3FbJKB0CHnu0k | rs695093   | 5.73                         | 5.47                      | -0.117               | 2.62                     | 26.4                          | 0.49   | 8.021                             | 0.215              | 7.195   | 7.922           | 8.033  | 8.173           | 8.515                   |         |
| MRE11A | rreiH3FbJKB0CHnu0k | rs521349   | 7.86                         | 7.50                      | 0.162                | 2.97                     | 26.54                         | 0.415  | 8.021                             | 0.215              | 7.195   | 7.922           | 8.033  | 8.173           | 8.515                   |         |
| MRE11A | rreiH3FbJKB0CHnu0k | rs658234   | 4.21                         | 4.02                      | 0.084                | 1.76                     | 47.29                         | 0.4575 | 8.021                             | 0.215              | 7.195   | 7.922           | 8.033  | 8.173           | 8.515                   |         |
| MRGPRF | WKl.pZfay_F5f94dag | rs4930255  | 3.43                         | 3.28                      | 0.065                | 0.3                      | -33.71                        | 0.24   | 7.12                              | 0.019              | 7.094   | 7.108           | 7.115  | 7.127           | 7.247                   |         |
| MRPL17 | K6Et_Oq_IF96oll4V0 | rs7129828  | 3.34                         | 3.20                      | -0.063               | 1.02                     | -36.77                        | 0.1325 | 10.096                            | 0.32               | 9.405   | 9.887           | 10.085 | 10.313          | 11.012                  |         |
| MRPL21 | uhfm7oIlPYeiCteevo | rs604524   | 6.25                         | 5.97                      | 0.135                | 1.37                     | -28.82                        | 0.29   | 10.451                            | 0.295              | 8.576   | 10.296          | 10.47  | 10.646          | 11.071                  |         |
| MRPL21 | uhfm7oIlPYeiCteevo | rs629426   | 6.28                         | 6.00                      | -0.136               | 1.25                     | -0.2                          | 0.2875 | 10.451                            | 0.295              | 8.576   | 10.296          | 10.47  | 10.646          | 11.071                  |         |
| MRPL21 | uhfm7oIlPYeiCteevo | rs10896379 | 4.51                         | 4.31                      | -0.092               | 1.18                     | 9.27                          | 0.1725 | 10.451                            | 0.295              | 8.576   | 10.296          | 10.47  | 10.646          | 11.071                  |         |
| MRPL21 | uhfm7oIlPYeiCteevo | rs622082   | 5.29                         | 5.06                      | -0.114               | 1.3                      | 32.66                         | 0.2854 | 10.451                            | 0.295              | 8.576   | 10.296          | 10.47  | 10.646          | 11.071                  |         |
| MRPL21 | uhfm7oIlPYeiCteevo | rs10896384 | 5.15                         | 4.92                      | 0.109                | 1.33                     | 48.71                         | 0.2925 | 10.451                            | 0.295              | 8.576   | 10.296          | 10.47  | 10.646          | 11.071                  |         |
| MRPL27 | HuclLqAqBel6J3eNFc | rs2586473  | 3.64                         | 3.48                      | 0.069                | 1.98                     | -28.96                        | 0.49   | 7.295                             | 0.123              | 7.106   | 7.204           | 7.262  | 7.367           | 7.76                    |         |
| MRPL27 | HuclLqAqBel6J3eNFc | rs2097844  | 3.56                         | 3.41                      | 0.067                | 1.35                     | -14.53                        | 0.485  | 7.295                             | 0.123              | 7.106   | 7.204           | 7.262  | 7.367           | 7.76                    |         |
| MRPL27 | HuclLqAqBel6J3eNFc | rs4794136  | 3.61                         | 3.45                      | 0.068                | 1.25                     | -11.27                        | 0.4925 | 7.295                             | 0.123              | 7.106   | 7.204           | 7.262  | 7.367           | 7.76                    |         |
| MRPL35 | ihSoSuylwoekFI0k0  | rs4832254  | 5.79                         | 5.43                      | -0.114               | 3.28                     | 2.48                          | 0.0808 | 9.119                             | 0.257              | 8.434   | 8.978           | 9.153  | 9.278           | 9.718                   |         |
| MRPL35 | ihSoSuylwoekFI0k0  | rs749581   | 4.92                         | 4.71                      | 0.096                | 2.39                     | 8.26                          | 0.13   | 9.119                             | 0.257              | 8.434   | 8.978           | 9.153  | 9.278           | 9.718                   |         |
| MRPL35 | ihSoSuylwoekFI0k0  | rs7419344  | 5.23                         | 5.00                      | -0.102               | 3.37                     | 11.17                         | 0.0875 | 9.119                             | 0.257              | 8.434   | 8.978           | 9.153  | 9.278           | 9.718                   |         |
| MRPL35 | ihSoSuylwoekFI0k0  | rs4832257  | 4.92                         | 4.71                      | -0.096               | 2.45                     | 13.95                         | 0.13   | 9.119                             | 0.257              | 8.434   | 8.978           | 9.153  | 9.278           | 9.718                   |         |
| MRPL35 | 3STIKUo88qI9dgHLu4 | rs1559514  | 3.37                         | 3.23                      | 0.059                | 1.14                     | 22.83                         | 0.3625 | 8.334                             | 0.226              | 7.274   | 8.217           | 8.326  | 8.469           | 8.939                   |         |
| MRPL35 | 3STIKUo88qI9dgHLu4 | rs9677502  | 3.75                         | 3.59                      | -0.067               | 1.83                     | 40.97                         | 0.4925 | 8.334                             | 0.226              | 7.274   | 8.217           | 8.326  | 8.469           | 8.939                   |         |
| MRPL36 | HWKRCISIOYF1dSLRk  | rs3776150  | 3.81                         | 3.64                      | -0.073               | 1.3                      | 3.96                          | 0.25   | 10.671                            | 0.255              | 9.755   | 10.521          | 10.696 | 10.866          | 11.172                  |         |
| MRPL39 | 6pM_m9e5zjje7jlio  | rs1740084  | 4.16                         | 3.98                      | 0.077                | 0.16                     | -46.88                        | 0.1475 | 9.894                             | 0.338              | 7.717   | 9.709           | 9.932  | 10.138          | 10.457                  |         |
| MRPL39 | 6pM_m9e5zjje7jlio  | rs1893650  | 6.11                         | 5.84                      | -0.118               | 0.9                      | -17.15                        | 0.2825 | 9.894                             | 0.338              | 7.717   | 9.709           | 9.932  | 10.138          | 10.457                  |         |
| MRPL39 | 6pM_m9e5zjje7jlio  | rs2829803  | 6.11                         | 5.84                      | -0.118               | 0.9                      | -9.66                         | 0.2825 | 9.894                             | 0.338              | 7.717   | 9.709           | 9.932  | 10.138          | 10.457                  |         |
| MRPL39 | 6pM_m9e5zjje7jlio  | rs2829806  | 6.11                         | 5.84                      | -0.118               | 0.93                     | 2.22                          | 0.2825 | 9.894                             | 0.338              | 7.717   | 9.709           | 9.932  | 10.138          | 10.457                  |         |
| MRPL39 | 6pM_m9e5zjje7jlio  | rs7276984  | 4.44                         | 4.25                      | -0.083               | 0.15                     | 8.85                          | 0.16   | 9.894                             | 0.338              | 7.717   | 9.709           | 9.932  | 10.138          | 10.457                  |         |
| MRPL39 | 6pM_m9e5zjje7jlio  | rs9974676  | 5.99                         | 5.72                      | -0.114               | 0.79                     | 25.25                         | 0.2775 | 9.894                             | 0.338              | 7.717   | 9.709           | 9.932  | 10.138          | 10.457                  |         |
| MRPL39 | 6pM_m9e5zjje7jlio  | rs763331   | 5.01                         | 4.79                      | -0.095               | 0.66                     | 29.52                         | 0.2854 | 9.894                             | 0.338              | 7.717   | 9.709           | 9.932  | 10.138          | 10.457                  |         |
| MRPL39 | 6pM_m9e5zjje7jlio  | rs2829841  | 5.25                         | 5.02                      | -0.1                 | 1.61                     | 43.22                         | 0.1475 | 9.894                             | 0.338              | 7.717   | 9.709           | 9.932  | 10.138          | 10.457                  |         |
| MRPL39 | 6pM_m9e5zjje7jlio  | rs963103   | 4.91                         | 4.70                      | -0.096               | 0.62                     | 49.16                         | 0.2813 | 9.894                             | 0.338              | 7.717   | 9.709           | 9.932  | 10.138          | 10.457                  |         |
| MRPL42 | cgXxUBC6iSiUBzSnU  | rs11107052 | 3.41                         | 3.27                      | -0.062               | 0.25                     | 4.86                          | 0.1575 | 8.154                             | 0.222              | 7.374   | 8.027           | 8.172  | 8.299           | 8.708                   |         |

| Symbol | Lumi nuID           | SNP        | Population-based             | Population-based                      | % Variance Explained | Family-based                 | Distance from transcript (kb) | MAF    | Mean   | Transcript abundance (log2 scale) |         |                 |        |                 | SNP mapping under probe |         |
|--------|---------------------|------------|------------------------------|---------------------------------------|----------------------|------------------------------|-------------------------------|--------|--------|-----------------------------------|---------|-----------------|--------|-----------------|-------------------------|---------|
|        |                     |            | association p-value (-log10) | association p-value (-log10), GC adj. |                      | association p-value (-log10) |                               |        |        | Standard Deviation                | Minimum | 25th percentile | Median | 75th percentile |                         | Maximum |
| MRPL42 | cgXxUBC6iJsiUBzSnU  | rs10859510 | 3.41                         | 3.26                                  | 0.062                | 0.24                         | 27.2                          | 0.16   | 8.154  | 0.222                             | 7.374   | 8.027           | 8.172  | 8.299           | 8.708                   |         |
| MRPL43 | o0gkTJz5T011klp6ks  | rs10509748 | 9.25                         | 8.83                                  | 0.191                | 4.8                          | -49.72                        | 0.45   | 7.536  | 0.255                             | 7.154   | 7.322           | 7.501  | 7.71            | 8.164                   |         |
| MRPL43 | o0gkTJz5T011klp6ks  | rs1122556  | 4.89                         | 4.67                                  | -0.099               | 2.67                         | -34.54                        | 0.4523 | 7.536  | 0.255                             | 7.154   | 7.322           | 7.501  | 7.71            | 8.164                   |         |
| MRPL43 | o0gkTJz5T011klp6ks  | rs2863095  | 30.83                        | 29.36                                 | 0.513                | 9.83                         | -0.77                         | 0.2075 | 7.536  | 0.255                             | 7.154   | 7.322           | 7.501  | 7.71            | 8.164                   |         |
| MRPL43 | lieXv39S5efeqkuF_4  | rs2863095  | 9.07                         | 8.66                                  | -0.179               | 2.39                         | 0.48                          | 0.2075 | 10.119 | 0.273                             | 9.365   | 9.907           | 10.156 | 10.307          | 10.908                  |         |
| MRPL43 | 3DF8Gqe5mKlk1HkLa0  | rs2863095  | 7.66                         | 7.31                                  | 0.155                | 5.82                         | 0.48                          | 0.2075 | 9.272  | 0.4                               | 7.22    | 9.087           | 9.315  | 9.496           | 10.115                  | Yes     |
| MRPL43 | KLklZZR6LlezoLVfDA  | rs2863095  | 7.49                         | 7.16                                  | 0.147                | 4.4                          | -0.77                         | 0.2075 | 8.111  | 0.419                             | 7.28    | 7.8             | 8.061  | 8.404           | 9.536                   |         |
| MRPL43 | o0gkTJz5T011klp6ks  | rs3740484  | 12.49                        | 11.91                                 | 0.246                | 4.83                         | 0.09                          | 0.3015 | 7.536  | 0.255                             | 7.154   | 7.322           | 7.501  | 7.71            | 8.164                   |         |
| MRPL43 | 3DF8Gqe5mKlk1HkLa0  | rs3740484  | 6.84                         | 6.53                                  | 0.139                | 2.52                         | 0.09                          | 0.3015 | 9.272  | 0.4                               | 7.22    | 9.087           | 9.315  | 9.496           | 10.115                  | Yes     |
| MRPL43 | lieXv39S5efeqkuF_4  | rs3740484  | 5.27                         | 5.04                                  | -0.104               | 2.03                         | 0.09                          | 0.3015 | 10.119 | 0.273                             | 9.365   | 9.907           | 10.156 | 10.307          | 10.908                  |         |
| MRPL43 | o0gkTJz5T011klp6ks  | rs3740487  | 30.83                        | 29.36                                 | -0.513               | 9.83                         | 3.51                          | 0.2075 | 7.536  | 0.255                             | 7.154   | 7.322           | 7.501  | 7.71            | 8.164                   |         |
| MRPL43 | lieXv39S5efeqkuF_4  | rs3740487  | 9.07                         | 8.66                                  | 0.179                | 2.39                         | 3.51                          | 0.2075 | 10.119 | 0.273                             | 9.365   | 9.907           | 10.156 | 10.307          | 10.908                  |         |
| MRPL43 | 3DF8Gqe5mKlk1HkLa0  | rs3740487  | 7.66                         | 7.31                                  | -0.155               | 5.82                         | 3.51                          | 0.2075 | 9.272  | 0.4                               | 7.22    | 9.087           | 9.315  | 9.496           | 10.115                  | Yes     |
| MRPL43 | KLklZZR6LlezoLVfDA  | rs3740487  | 7.49                         | 7.16                                  | -0.147               | 4.4                          | 3.51                          | 0.2075 | 8.111  | 0.419                             | 7.28    | 7.8             | 8.061  | 8.404           | 9.536                   |         |
| MRPL43 | o0gkTJz5T011klp6ks  | rs701836   | 16.64                        | 15.86                                 | -0.31                | 8.18                         | 19.84                         | 0.2475 | 7.536  | 0.255                             | 7.154   | 7.322           | 7.501  | 7.71            | 8.164                   |         |
| MRPL43 | lieXv39S5efeqkuF_4  | rs701836   | 6.46                         | 6.17                                  | 0.126                | 1.41                         | 19.84                         | 0.2475 | 10.119 | 0.273                             | 9.365   | 9.907           | 10.156 | 10.307          | 10.908                  |         |
| MRPL43 | 3DF8Gqe5mKlk1HkLa0  | rs701836   | 5.37                         | 5.14                                  | -0.106               | 5.51                         | 19.84                         | 0.2475 | 9.272  | 0.4                               | 7.22    | 9.087           | 9.315  | 9.496           | 10.115                  | Yes     |
| MRPL43 | o0gkTJz5T011klp6ks  | rs11190790 | 4.36                         | 4.17                                  | -0.085               | 2.95                         | 25.01                         | 0.395  | 7.536  | 0.255                             | 7.154   | 7.322           | 7.501  | 7.71            | 8.164                   |         |
| MRPL52 | NlnqEUIEJ7yNHl6in4  | rs2065134  | 3.46                         | 3.31                                  | 0.062                | 0.51                         | -40.91                        | 0.09   | 8.075  | 0.221                             | 7.238   | 7.927           | 8.118  | 8.234           | 8.583                   |         |
| MRPL52 | NlnqEUIEJ7yNHl6in4  | rs3811188  | 4.79                         | 4.58                                  | -0.089               | 1.72                         | 0.04                          | 0.465  | 8.075  | 0.221                             | 7.238   | 7.927           | 8.118  | 8.234           | 8.583                   |         |
| MRPL52 | NlnqEUIEJ7yNHl6in4  | rs17122926 | 7.46                         | 7.12                                  | 0.14                 | 2.82                         | 0.82                          | 0.195  | 8.075  | 0.221                             | 7.238   | 7.927           | 8.118  | 8.234           | 8.583                   |         |
| MRPL52 | NlnqEUIEJ7yNHl6in4  | rs1042704  | 6.66                         | 6.36                                  | 0.124                | 3.01                         | 8.35                          | 0.2161 | 8.075  | 0.221                             | 7.238   | 7.927           | 8.118  | 8.234           | 8.583                   |         |
| MRPL53 | xprnTdfnegOdFI9l1RM | rs1063588  | 5.13                         | 4.91                                  | -0.103               | 1.62                         | -8.73                         | 0.1525 | 10.032 | 0.402                             | 9.19    | 9.734           | 10.055 | 10.34           | 11.191                  |         |
| MRPL53 | xprnTdfnegOdFI9l1RM | rs1047911  | 5.38                         | 5.14                                  | 0.109                | 1.67                         | -0.15                         | 0.15   | 10.032 | 0.402                             | 9.19    | 9.734           | 10.055 | 10.34           | 11.191                  |         |
| MRPL53 | xprnTdfnegOdFI9l1RM | rs6707475  | 4.85                         | 4.64                                  | -0.098               | 1.09                         | 10.56                         | 0.16   | 10.032 | 0.402                             | 9.19    | 9.734           | 10.055 | 10.34           | 11.191                  |         |
| MRPS10 | NsgkrU7f_6.XkTf6Ll  | rs13217993 | 3.7                          | 3.54                                  | 0.076                | 4.96                         | -10.14                        | 0.3925 | 10.477 | 0.307                             | 7.157   | 10.368          | 10.491 | 10.645          | 10.911                  |         |
| MRPS10 | NsgkrU7f_6.XkTf6Ll  | rs722269   | 3.56                         | 3.41                                  | -0.073               | 5.01                         | 9.31                          | 0.3875 | 10.477 | 0.307                             | 7.157   | 10.368          | 10.491 | 10.645          | 10.911                  |         |
| MRPS25 | QPufki_7ukkk.i1ODk  | rs11717371 | 4.58                         | 4.38                                  | -0.088               | 2.71                         | -4.28                         | 0.2175 | 8.355  | 0.345                             | 7.535   | 8.113           | 8.318  | 8.534           | 10.176                  |         |
| MRPS35 | N7qnT.IKlCcuUgCyC6l | rs7133442  | 4.67                         | 4.46                                  | -0.094               | 2.62                         | -14.95                        | 0.3869 | 9.464  | 0.233                             | 8.61    | 9.368           | 9.496  | 9.599           | 9.959                   |         |
| MRPS35 | N7qnT.IKlCcuUgCyC6l | rs929948   | 5.25                         | 5.02                                  | 0.106                | 3                            | -13.93                        | 0.3875 | 9.464  | 0.233                             | 8.61    | 9.368           | 9.496  | 9.599           | 9.959                   |         |
| MRPS35 | N7qnT.IKlCcuUgCyC6l | rs7310809  | 3.47                         | 3.32                                  | 0.067                | 2.19                         | 0.61                          | 0.4625 | 9.464  | 0.233                             | 8.61    | 9.368           | 9.496  | 9.599           | 9.959                   |         |
| MRPS7  | Tld5ZCAS7iceUZ4AcU  | rs1871269  | 5.34                         | 5.11                                  | 0.108                | 2.75                         | -36.79                        | 0.2437 | 9.574  | 0.2                               | 8.691   | 9.467           | 9.582  | 9.704           | 9.98                    |         |
| MRPS7  | Tld5ZCAS7iceUZ4AcU  | rs1478785  | 4.63                         | 4.43                                  | -0.093               | 2.57                         | -34.92                        | 0.25   | 9.574  | 0.2                               | 8.691   | 9.467           | 9.582  | 9.704           | 9.98                    |         |
| MRPS7  | Tld5ZCAS7iceUZ4AcU  | rs2242231  | 6.13                         | 5.86                                  | 0.125                | 3.31                         | -14.86                        | 0.2175 | 9.574  | 0.2                               | 8.691   | 9.467           | 9.582  | 9.704           | 9.98                    |         |
| MRPS7  | Tld5ZCAS7iceUZ4AcU  | rs4789157  | 6.13                         | 5.86                                  | 0.125                | 3.31                         | -14.48                        | 0.2175 | 9.574  | 0.2                               | 8.691   | 9.467           | 9.582  | 9.704           | 9.98                    |         |
| MSC    | NNW3X1QnVp.9w0pKbc  | rs3779757  | 3.47                         | 3.32                                  | -0.068               | 0.75                         | -0.06                         | 0.255  | 7.338  | 0.145                             | 7.117   | 7.233           | 7.313  | 7.423           | 8.323                   |         |
| MSC    | NNW3X1QnVp.9w0pKbc  | rs2035376  | 4.16                         | 3.98                                  | 0.083                | 0.98                         | 4.57                          | 0.24   | 7.338  | 0.145                             | 7.117   | 7.233           | 7.313  | 7.423           | 8.323                   |         |
| MSH3   | To1KZJIELV4.7RfX8U  | rs12517451 | 4.65                         | 4.45                                  | 0.088                | 1.23                         | -30.22                        | 0.235  | 8.658  | 0.261                             | 7.756   | 8.502           | 8.666  | 8.836           | 9.407                   | Yes     |
| MSH3   | To1KZJIELV4.7RfX8U  | rs1650647  | 4.51                         | 4.31                                  | 0.085                | 1.7                          | 20.13                         | 0.295  | 8.658  | 0.261                             | 7.756   | 8.502           | 8.666  | 8.836           | 9.407                   | Yes     |
| MSH3   | To1KZJIELV4.7RfX8U  | rs2035256  | 5.63                         | 5.38                                  | -0.11                | 2.65                         | 46.35                         | 0.4325 | 8.658  | 0.261                             | 7.756   | 8.502           | 8.666  | 8.836           | 9.407                   | Yes     |
| MSH3   | To1KZJIELV4.7RfX8U  | rs3776967  | 4.42                         | 4.23                                  | -0.087               | 1.65                         | 52.06                         | 0.3392 | 8.658  | 0.261                             | 7.756   | 8.502           | 8.666  | 8.836           | 9.407                   | Yes     |
| MSH3   | To1KZJIELV4.7RfX8U  | rs6151816  | 4.55                         | 4.35                                  | 0.087                | 1.68                         | -99                           | 0.1525 | 8.658  | 0.261                             | 7.756   | 8.502           | 8.666  | 8.836           | 9.407                   | Yes     |
| MSH3   | To1KZJIELV4.7RfX8U  | rs32989    | 4.72                         | 4.52                                  | 0.096                | 2.72                         | -56.54                        | 0.35   | 8.658  | 0.261                             | 7.756   | 8.502           | 8.666  | 8.836           | 9.407                   | Yes     |
| MSH3   | To1KZJIELV4.7RfX8U  | rs3797898  | 4.44                         | 4.25                                  | 0.086                | 1.81                         | -49.32                        | 0.1389 | 8.658  | 0.261                             | 7.756   | 8.502           | 8.666  | 8.836           | 9.407                   | Yes     |
| MSH3   | To1KZJIELV4.7RfX8U  | rs6874652  | 4.41                         | 4.22                                  | 0.084                | 1.43                         | -41.92                        | 0.1425 | 8.658  | 0.261                             | 7.756   | 8.502           | 8.666  | 8.836           | 9.407                   | Yes     |
| MSH3   | To1KZJIELV4.7RfX8U  | rs2897298  | 4.41                         | 4.22                                  | -0.084               | 1.43                         | -19.16                        | 0.1425 | 8.658  | 0.261                             | 7.756   | 8.502           | 8.666  | 8.836           | 9.407                   | Yes     |
| MSH3   | To1KZJIELV4.7RfX8U  | rs245340   | 4.74                         | 4.53                                  | -0.096               | 2.73                         | -11.13                        | 0.3525 | 8.658  | 0.261                             | 7.756   | 8.502           | 8.666  | 8.836           | 9.407                   | Yes     |
| MSH3   | To1KZJIELV4.7RfX8U  | rs26279    | 4.74                         | 4.53                                  | 0.096                | 2.73                         | -3.7                          | 0.3525 | 8.658  | 0.261                             | 7.756   | 8.502           | 8.666  | 8.836           | 9.407                   | Yes     |
| MSI2   | cdVNUFfjpo0faNir4cQ | rs886929   | 3.41                         | 3.26                                  | -0.062               | 3.35                         | 43.34                         | 0.235  | 7.804  | 0.146                             | 7.452   | 7.712           | 7.804  | 7.885           | 8.62                    |         |
| MSLN   | B9RVCIHZNswGoE5VeQ  | rs12448639 | 3.74                         | 3.58                                  | -0.073               | 0.69                         | -12.64                        | 0.1288 | 7.176  | 0.273                             | 7.098   | 7.117           | 7.127  | 7.146           | 9.446                   |         |
| MSLN   | B9RVCIHZNswGoE5VeQ  | rs3764246  | 3.48                         | 3.34                                  | 0.065                | 1.34                         | -0.99                         | 0.275  | 7.176  | 0.273                             | 7.098   | 7.117           | 7.127  | 7.146           | 9.446                   |         |
| MSLN   | B9RVCIHZNswGoE5VeQ  | rs2235505  | 3.3                          | 3.16                                  | 0.061                | 1.2                          | 0.3                           | 0.2688 | 7.176  | 0.273                             | 7.098   | 7.117           | 7.127  | 7.146           | 9.446                   |         |
| MSLN   | B9RVCIHZNswGoE5VeQ  | rs3765266  | 3.87                         | 3.70                                  | 0.072                | 1.63                         | 21.9                          | 0.1725 | 7.176  | 0.273                             | 7.098   | 7.117           | 7.127  | 7.146           | 9.446                   |         |
| MSRA   | HfrlJwruJ6ivnoSjqo  | rs11993663 | 3.33                         | 3.19                                  | 0.064                | 2.36                         | 121.07                        | 0.305  | 8.458  | 0.149                             | 7.95    | 8.365           | 8.463  | 8.555           | 8.869                   |         |
| MSRA   | HfrlJwruJ6ivnoSjqo  | rs10503406 | 3.31                         | 3.17                                  | 0.063                | 4.15                         | -177.42                       | 0.42   | 8.458  | 0.149                             | 7.95    | 8.365           | 8.463  | 8.555           | 8.869                   |         |
| MSRA   | HfrlJwruJ6ivnoSjqo  | rs13250969 | 3.87                         | 3.70                                  | -0.074               | 2.55                         | -162.42                       | 0.4775 | 8.458  | 0.149                             | 7.95    | 8.365           | 8.463  | 8.555           | 8.869                   |         |
| MSRA   | HfrlJwruJ6ivnoSjqo  | rs6601427  | 3.38                         | 3.24                                  | -0.067               | 2.42                         | -130.37                       | 0.4072 | 8.458  | 0.149                             | 7.95    | 8.365           | 8.463  | 8.555           | 8.869                   |         |
| MSRA   | HfrlJwruJ6ivnoSjqo  | rs7832708  | 4.33                         | 4.14                                  | -0.087               | 3.87                         | -96.36                        | 0.44   | 8.458  | 0.149                             | 7.95    | 8.365           | 8.463  | 8.555           | 8.869                   |         |
| MSRA   | HfrlJwruJ6ivnoSjqo  | rs4841326  | 4.09                         | 3.92                                  | 0.081                | 3.35                         | -81.83                        | 0.3225 | 8.458  | 0.149                             | 7.95    | 8.365           | 8.463  | 8.555           | 8.869                   |         |
| MSRA   | HfrlJwruJ6ivnoSjqo  | rs12679609 | 3.64                         | 3.48                                  | 0.07                 | 1.68                         | -75.33                        | 0.165  | 8.458  | 0.149                             | 7.95    | 8.365           | 8.463  | 8.555           | 8.869                   |         |
| MSRA   | HfrlJwruJ6ivnoSjqo  | rs7015455  | 3.47                         | 3.32                                  | 0.066                | 1.77                         | -61.24                        | 0.43   | 8.458  | 0.149                             | 7.95    | 8.365           | 8.463  | 8.555           | 8.869                   |         |
| MSRA   | HfrlJwruJ6ivnoSjqo  | rs11249994 | 3.75                         | 3.59                                  | -0.071               | 3.14                         | -49.58                        | 0.495  | 8.458  | 0.149                             | 7.95    | 8.365           | 8.463  | 8.555           | 8.869                   |         |

| Symbol  | Lumi nuID          | SNP        | Population-based association p-value (-log10) | Population-based association p-value (-log10), GC adj. | % Variance Explained | Family-based association p-value (-log10) | Distance from transcript (kb) | MAF    | Mean   | Transcript abundance (log2 scale) |         |                 |        |                 | SNP mapping under probe |         |
|---------|--------------------|------------|-----------------------------------------------|--------------------------------------------------------|----------------------|-------------------------------------------|-------------------------------|--------|--------|-----------------------------------|---------|-----------------|--------|-----------------|-------------------------|---------|
|         |                    |            |                                               |                                                        |                      |                                           |                               |        |        | Standard Deviation                | Minimum | 25th percentile | Median | 75th percentile |                         | Maximum |
| MSRA    | Hfr1JwruJ6ivnoSjgo | rs10283145 | 4.14                                          | 3.96                                                   | 0.081                | 4.04                                      | -44.98                        | 0.445  | 8.458  | 0.149                             | 7.95    | 8.365           | 8.463  | 8.555           | 8.869                   |         |
| MSRA    | Hfr1JwruJ6ivnoSjgo | rs17765901 | 5.41                                          | 5.17                                                   | 0.108                | 4.93                                      | -36.91                        | 0.4575 | 8.458  | 0.149                             | 7.95    | 8.365           | 8.463  | 8.555           | 8.869                   |         |
| MSRA    | Hfr1JwruJ6ivnoSjgo | rs1962073  | 4.54                                          | 4.34                                                   | 0.089                | 3.78                                      | -25.84                        | 0.415  | 8.458  | 0.149                             | 7.95    | 8.365           | 8.463  | 8.555           | 8.869                   |         |
| MSRA    | Hfr1JwruJ6ivnoSjgo | rs6999466  | 4.56                                          | 4.36                                                   | -0.087               | 4.34                                      | -20.68                        | 0.34   | 8.458  | 0.149                             | 7.95    | 8.365           | 8.463  | 8.555           | 8.869                   |         |
| MSRA    | Hfr1JwruJ6ivnoSjgo | rs4521760  | 3.9                                           | 3.74                                                   | -0.074               | 3.01                                      | -12.21                        | 0.345  | 8.458  | 0.149                             | 7.95    | 8.365           | 8.463  | 8.555           | 8.869                   |         |
| MSRA    | Hfr1JwruJ6ivnoSjgo | rs17767186 | 4.09                                          | 3.92                                                   | -0.077               | 2.47                                      | -8.9                          | 0.2714 | 8.458  | 0.149                             | 7.95    | 8.365           | 8.463  | 8.555           | 8.869                   |         |
| MSRA    | Hfr1JwruJ6ivnoSjgo | rs14879    | 5.38                                          | 5.15                                                   | -0.103               | 4.34                                      | -0.12                         | 0.2925 | 8.458  | 0.149                             | 7.95    | 8.365           | 8.463  | 8.555           | 8.869                   |         |
| MSRA    | Hfr1JwruJ6ivnoSjgo | rs4841339  | 3.51                                          | 3.36                                                   | 0.067                | 3.69                                      | 7.93                          | 0.265  | 8.458  | 0.149                             | 7.95    | 8.365           | 8.463  | 8.555           | 8.869                   |         |
| MSRA    | Hfr1JwruJ6ivnoSjgo | rs7837520  | 3.91                                          | 3.75                                                   | -0.074               | 4.04                                      | 13.74                         | 0.26   | 8.458  | 0.149                             | 7.95    | 8.365           | 8.463  | 8.555           | 8.869                   |         |
| MSRA    | Hfr1JwruJ6ivnoSjgo | rs7833781  | 4.42                                          | 4.23                                                   | -0.086               | 4.34                                      | 47.08                         | 0.43   | 8.458  | 0.149                             | 7.95    | 8.365           | 8.463  | 8.555           | 8.869                   |         |
| MT1A    | 055155VOJ7IC7ISp5M | rs8052106  | 4.56                                          | 4.36                                                   | -0.089               | 1.84                                      | -37.48                        | 0.3025 | 10.508 | 0.409                             | 9.616   | 10.202          | 10.572 | 10.789          | 11.569                  |         |
| MT1F    | QeeYeOUoQX91SOWEil | rs7189840  | 17.58                                         | 16.76                                                  | 0.341                | 6.73                                      | -8.23                         | 0.4475 | 10.09  | 0.319                             | 9.098   | 9.913           | 10.089 | 10.323          | 10.82                   |         |
| MT1F    | QeeYeOUoQX91SOWEil | rs1875233  | 6.86                                          | 6.55                                                   | -0.137               | 1.6                                       | -5.15                         | 0.47   | 10.09  | 0.319                             | 9.098   | 9.913           | 10.089 | 10.323          | 10.82                   |         |
| MT1F    | QeeYeOUoQX91SOWEil | rs7193812  | 5.81                                          | 5.55                                                   | 0.119                | 2.76                                      | -2.5                          | 0.105  | 10.09  | 0.319                             | 9.098   | 9.913           | 10.089 | 10.323          | 10.82                   |         |
| MT1F    | QeeYeOUoQX91SOWEil | rs12232396 | 3.61                                          | 3.46                                                   | -0.073               | 0.24                                      | -1.67                         | 0.2036 | 10.09  | 0.319                             | 9.098   | 9.913           | 10.089 | 10.323          | 10.82                   |         |
| MT1F    | QeeYeOUoQX91SOWEil | rs2291956  | 5.8                                           | 5.55                                                   | -0.118               | 2.61                                      | 0.36                          | 0.1025 | 10.09  | 0.319                             | 9.098   | 9.913           | 10.089 | 10.323          | 10.82                   |         |
| MT1F    | QeeYeOUoQX91SOWEil | rs2291957  | 7.74                                          | 7.39                                                   | 0.154                | 3.9                                       | 0.05                          | 0.2775 | 10.09  | 0.319                             | 9.098   | 9.913           | 10.089 | 10.323          | 10.82                   |         |
| MT1F    | QeeYeOUoQX91SOWEil | rs7194895  | 9.64                                          | 9.20                                                   | -0.194               | 1.96                                      | 3.88                          | 0.33   | 10.09  | 0.319                             | 9.098   | 9.913           | 10.089 | 10.323          | 10.82                   |         |
| MT1F    | QeeYeOUoQX91SOWEil | rs4783952  | 8.77                                          | 8.37                                                   | 0.185                | 4.03                                      | 25.95                         | 0.4571 | 10.09  | 0.319                             | 9.098   | 9.913           | 10.089 | 10.323          | 10.82                   |         |
| MT1F    | QeeYeOUoQX91SOWEil | rs11076164 | 10.8                                          | 10.31                                                  | -0.223               | 4.42                                      | 26.19                         | 0.41   | 10.09  | 0.319                             | 9.098   | 9.913           | 10.089 | 10.323          | 10.82                   |         |
| MT1F    | QeeYeOUoQX91SOWEil | rs4784714  | 9.19                                          | 8.77                                                   | -0.19                | 4.83                                      | 31.6                          | 0.4573 | 10.09  | 0.319                             | 9.098   | 9.913           | 10.089 | 10.323          | 10.82                   |         |
| MT1X    | Be1Z5u.1342oHxn3X4 | rs7193812  | 4.22                                          | 4.04                                                   | 0.086                | 0.85                                      | -27.04                        | 0.105  | 10.08  | 0.494                             | 7.434   | 9.859           | 10.127 | 10.393          | 11.202                  |         |
| MT1X    | Be1Z5u.1342oHxn3X4 | rs2291956  | 4.43                                          | 4.24                                                   | -0.09                | 0.9                                       | -24.18                        | 0.1025 | 10.08  | 0.494                             | 7.434   | 9.859           | 10.127 | 10.393          | 11.202                  |         |
| MT1X    | Be1Z5u.1342oHxn3X4 | rs4783952  | 4.31                                          | 4.13                                                   | 0.09                 | 1.56                                      | 1.05                          | 0.4571 | 10.08  | 0.494                             | 7.434   | 9.859           | 10.127 | 10.393          | 11.202                  |         |
| MT1X    | Be1Z5u.1342oHxn3X4 | rs11076164 | 3.96                                          | 3.79                                                   | -0.081               | 0.77                                      | 1.3                           | 0.41   | 10.08  | 0.494                             | 7.434   | 9.859           | 10.127 | 10.393          | 11.202                  |         |
| MT2A    | 051456hJvN17AgZh8  | rs12444489 | 4.68                                          | 4.48                                                   | -0.093               | 1.94                                      | -11.58                        | 0.215  | 10.508 | 0.436                             | 9.579   | 10.221          | 10.458 | 10.798          | 12.066                  |         |
| MT2A    | 051456hJvN17AgZh8  | rs8052106  | 6.92                                          | 6.61                                                   | -0.138               | 3.26                                      | -7.41                         | 0.3025 | 10.508 | 0.436                             | 9.579   | 10.221          | 10.458 | 10.798          | 12.066                  |         |
| MTAP    | cJ79KI75Sc5f4gXajU | rs4977734  | 3.56                                          | 3.41                                                   | -0.067               | 1.6                                       | -9.5                          | 0.275  | 8.669  | 0.223                             | 8.019   | 8.501           | 8.671  | 8.813           | 9.622                   |         |
| MTAP    | cJ79KI75Sc5f4gXajU | rs4607709  | 4.29                                          | 4.10                                                   | 0.082                | 0.95                                      | 15.37                         | 0.2675 | 8.669  | 0.223                             | 8.019   | 8.501           | 8.671  | 8.813           | 9.622                   |         |
| MTAP    | cJ79KI75Sc5f4gXajU | rs4977569  | 4.73                                          | 4.53                                                   | 0.091                | 1.86                                      | 28.52                         | 0.2236 | 8.669  | 0.223                             | 8.019   | 8.501           | 8.671  | 8.813           | 9.622                   |         |
| MTAP    | cJ79KI75Sc5f4gXajU | rs756641   | 4.8                                           | 4.59                                                   | 0.092                | 1.56                                      | 36.38                         | 0.225  | 8.669  | 0.223                             | 8.019   | 8.501           | 8.671  | 8.813           | 9.622                   |         |
| MTERFD2 | ik1TJFWV_VTRXupxOQ | rs2108487  | 4.81                                          | 4.60                                                   | 0.092                | 1.13                                      | -46.38                        | 0.135  | 7.388  | 0.183                             | 7.121   | 7.24            | 7.356  | 7.498           | 7.972                   |         |
| MTERFD2 | ik1TJFWV_VTRXupxOQ | rs1123650  | 5.56                                          | 5.31                                                   | 0.107                | 1.35                                      | -44.6                         | 0.0875 | 7.388  | 0.183                             | 7.121   | 7.24            | 7.356  | 7.498           | 7.972                   |         |
| MTERFD2 | ik1TJFWV_VTRXupxOQ | rs3815291  | 3.44                                          | 3.29                                                   | -0.063               | 1.36                                      | 6.03                          | 0.38   | 7.388  | 0.183                             | 7.121   | 7.24            | 7.356  | 7.498           | 7.972                   |         |
| MTERFD2 | ik1TJFWV_VTRXupxOQ | rs2286323  | 5.53                                          | 5.29                                                   | 0.107                | 2.39                                      | -4.93                         | 0.0875 | 7.388  | 0.183                             | 7.121   | 7.24            | 7.356  | 7.498           | 7.972                   |         |
| MTERFD2 | ik1TJFWV_VTRXupxOQ | rs1131293  | 5.85                                          | 5.59                                                   | 0.114                | 2.85                                      | 5.06                          | 0.1025 | 7.388  | 0.183                             | 7.121   | 7.24            | 7.356  | 7.498           | 7.972                   |         |
| MTERFD2 | ik1TJFWV_VTRXupxOQ | rs2074824  | 5.85                                          | 5.59                                                   | -0.114               | 2.85                                      | 10.05                         | 0.1025 | 7.388  | 0.183                             | 7.121   | 7.24            | 7.356  | 7.498           | 7.972                   |         |
| MTRFR1  | WvsfXp6izyI0osiPR8 | rs10504389 | 6.73                                          | 6.43                                                   | 0.132                | 0.89                                      | -0.79                         | 0.1275 | 7.998  | 0.188                             | 7.445   | 7.866           | 7.997  | 8.124           | 8.433                   |         |
| MTRFR1  | WvsfXp6izyI0osiPR8 | rs17304921 | 3.43                                          | 3.28                                                   | 0.065                | 0.6                                       | 32.62                         | 0.0575 | 7.998  | 0.188                             | 7.445   | 7.866           | 7.997  | 8.124           | 8.433                   |         |
| MTG1    | oK5FsuX6i7u8Ced0Us | rs7918164  | 4.14                                          | 3.96                                                   | -0.079               | 1.27                                      | -11.5                         | 0.22   | 7.536  | 0.187                             | 7.167   | 7.414           | 7.518  | 7.634           | 8.267                   |         |
| MTG1    | oK5FsuX6i7u8Ced0Us | rs10857712 | 3.86                                          | 3.70                                                   | -0.074               | 1.1                                       | -9.16                         | 0.2211 | 7.536  | 0.187                             | 7.167   | 7.414           | 7.518  | 7.634           | 8.267                   |         |
| MTHFS   | ZJnv5JNKC4JXEVB6bc | rs685487   | 4.51                                          | 4.31                                                   | 0.09                 | 1.23                                      | -1.19                         | 0.375  | 9.839  | 0.251                             | 9.261   | 9.67            | 9.82   | 10.023          | 10.528                  |         |
| MTMR15  | Bq5jX_ewHoiFLVASKo | rs1524878  | 4.04                                          | 3.87                                                   | 0.076                | 4.4                                       | -41.43                        | 0.4975 | 10.303 | 0.361                             | 9.458   | 10.056          | 10.26  | 10.523          | 11.755                  |         |
| MTRR    | x.VE8.t1OMUdCS7noU | rs2966952  | 10.41                                         | 9.93                                                   | 0.207                | 3.76                                      | -1.25                         | 0.16   | 9.767  | 0.72                              | 7.135   | 9.307           | 9.82   | 10.291          | 11.032                  | Yes     |
| MTRR    | x.VE8.t1OMUdCS7noU | rs326120   | 10.25                                         | 9.78                                                   | 0.208                | 3.85                                      | 5.57                          | 0.1675 | 9.767  | 0.72                              | 7.135   | 9.307           | 9.82   | 10.291          | 11.032                  | Yes     |
| MTRR    | x.VE8.t1OMUdCS7noU | rs1532268  | 3.53                                          | 3.38                                                   | -0.069               | 1.07                                      | 8.9                           | 0.365  | 9.767  | 0.72                              | 7.135   | 9.307           | 9.82   | 10.291          | 11.032                  | Yes     |
| MTRR    | x.VE8.t1OMUdCS7noU | rs162031   | 11.17                                         | 10.66                                                  | 0.228                | 5.3                                       | 11.01                         | 0.195  | 9.767  | 0.72                              | 7.135   | 9.307           | 9.82   | 10.291          | 11.032                  | Yes     |
| MTRR    | x.VE8.t1OMUdCS7noU | rs162040   | 7.53                                          | 7.20                                                   | 0.151                | 2.26                                      | -13.76                        | 0.1206 | 9.767  | 0.72                              | 7.135   | 9.307           | 9.82   | 10.291          | 11.032                  | Yes     |
| MTRR    | x.VE8.t1OMUdCS7noU | rs162048   | 12.04                                         | 11.48                                                  | 0.237                | 4.74                                      | -8.93                         | 0.16   | 9.767  | 0.72                              | 7.135   | 9.307           | 9.82   | 10.291          | 11.032                  | Yes     |
| MTRR    | x.VE8.t1OMUdCS7noU | rs3776455  | 11.88                                         | 11.33                                                  | -0.24                | 4.61                                      | -4.73                         | 0.325  | 9.767  | 0.72                              | 7.135   | 9.307           | 9.82   | 10.291          | 11.032                  | Yes     |
| MTRR    | x.VE8.t1OMUdCS7noU | rs1532267  | 9.64                                          | 9.20                                                   | -0.19                | 3.87                                      | 33.77                         | 0.12   | 9.767  | 0.72                              | 7.135   | 9.307           | 9.82   | 10.291          | 11.032                  | Yes     |
| MTRR    | x.VE8.t1OMUdCS7noU | rs97713    | 6.26                                          | 5.98                                                   | 0.122                | 2.72                                      | 40.52                         | 0.2025 | 9.767  | 0.72                              | 7.135   | 9.307           | 9.82   | 10.291          | 11.032                  | Yes     |
| MTRR    | x.VE8.t1OMUdCS7noU | rs329852   | 4.91                                          | 4.69                                                   | 0.093                | 1.74                                      | 42.56                         | 0.0725 | 9.767  | 0.72                              | 7.135   | 9.307           | 9.82   | 10.291          | 11.032                  | Yes     |
| MTSS1   | 6wSpE.eFgV3Qploov4 | rs4870903  | 7.96                                          | 7.60                                                   | 0.162                | 3.21                                      | 7.11                          | 0.25   | 8.415  | 0.309                             | 7.134   | 8.236           | 8.412  | 8.621           | 9.133                   | Yes     |
| MTSS1   | 6wSpE.eFgV3Qploov4 | rs7846270  | 6.76                                          | 6.46                                                   | -0.137               | 2.32                                      | 7.77                          | 0.4075 | 8.415  | 0.309                             | 7.134   | 8.236           | 8.412  | 8.621           | 9.133                   | Yes     |
| MTSS1   | 6wSpE.eFgV3Qploov4 | rs6470249  | 5.57                                          | 5.32                                                   | -0.111               | 1.83                                      | 8.63                          | 0.1775 | 8.415  | 0.309                             | 7.134   | 8.236           | 8.412  | 8.621           | 9.133                   | Yes     |
| MTSS1   | 6wSpE.eFgV3Qploov4 | rs6470250  | 4.05                                          | 3.88                                                   | 0.081                | 1.93                                      | 8.72                          | 0.2875 | 8.415  | 0.309                             | 7.134   | 8.236           | 8.412  | 8.621           | 9.133                   | Yes     |
| MTSS1   | 6wSpE.eFgV3Qploov4 | rs3763542  | 7.4                                           | 7.07                                                   | -0.156               | 2.63                                      | 10.74                         | 0.475  | 8.415  | 0.309                             | 7.134   | 8.236           | 8.412  | 8.621           | 9.133                   | Yes     |
| MTSS1   | 6wSpE.eFgV3Qploov4 | rs7824951  | 10.78                                         | 10.28                                                  | -0.219               | 3.41                                      | 15.69                         | 0.2925 | 8.415  | 0.309                             | 7.134   | 8.236           | 8.412  | 8.621           | 9.133                   | Yes     |
| MTSS1   | 6wSpE.eFgV3Qploov4 | rs3857944  | 9.37                                          | 8.94                                                   | 0.191                | 3.31                                      | 16.76                         | 0.295  | 8.415  | 0.309                             | 7.134   | 8.236           | 8.412  | 8.621           | 9.133                   | Yes     |
| MTSS1   | 6wSpE.eFgV3Qploov4 | rs6470253  | 7.75                                          | 7.40                                                   | 0.162                | 2.72                                      | 33.23                         | 0.4575 | 8.415  | 0.309                             | 7.134   | 8.236           | 8.412  | 8.621           | 9.133                   | Yes     |
| MTSS1   | 6wSpE.eFgV3Qploov4 | rs4871506  | 5.94                                          | 5.68                                                   | 0.12                 | 2.74                                      | 37.79                         | 0.485  | 8.415  | 0.309                             | 7.134   | 8.236           | 8.412  | 8.621           | 9.133                   | Yes     |

| Symbol | Lumi nuID          | SNP        | Population-based association |                      |                           | Family-based association |                               |        | Transcript abundance (log2 scale) |                    |         |                 |        |                 | SNP mapping under probe |         |     |
|--------|--------------------|------------|------------------------------|----------------------|---------------------------|--------------------------|-------------------------------|--------|-----------------------------------|--------------------|---------|-----------------|--------|-----------------|-------------------------|---------|-----|
|        |                    |            | p-value (-log10)             | % Variance Explained | p-value (-log10), GC adv. | p-value (-log10)         | Distance from transcript (kb) | MAF    | Mean                              | Standard Deviation | Minimum | 25th percentile | Median | 75th percentile |                         | Maximum |     |
| MTSS1  | 6wSpE.eFgV3Qploov4 | rs4871507  | 3.95                         |                      | 3.78                      | -0.077                   | 1.56                          | 37.92  | 0.3725                            | 8.415              | 0.309   | 7.134           | 8.236  | 8.412           | 8.621                   | 9.133   | Yes |
| MTUS1  | ixh4aUCj59gF9h9fSo | rs4921804  | 5.64                         |                      | 5.39                      | 0.11                     | 3.39                          | -4.55  | 0.395                             | 7.455              | 0.213   | 7.11            | 7.295  | 7.411           | 7.594                   | 7.987   |     |
| MTUS1  | ixh4aUCj59gF9h9fSo | rs209973   | 5.68                         |                      | 5.43                      | 0.116                    | 2.18                          | -4.32  | 0.3025                            | 7.455              | 0.213   | 7.11            | 7.295  | 7.411           | 7.594                   | 7.987   |     |
| MTUS1  | ixh4aUCj59gF9h9fSo | rs374386   | 8.26                         |                      | 7.88                      | 0.168                    | 2.66                          | 3.35   | 0.3425                            | 7.455              | 0.213   | 7.11            | 7.295  | 7.411           | 7.594                   | 7.987   |     |
| MTUS1  | ixh4aUCj59gF9h9fSo | rs4921809  | 8.57                         |                      | 8.18                      | -0.172                   | 2.47                          | 9.89   | 0.38                              | 7.455              | 0.213   | 7.11            | 7.295  | 7.411           | 7.594                   | 7.987   |     |
| MTUS1  | ixh4aUCj59gF9h9fSo | rs7830863  | 9.7                          |                      | 9.26                      | 0.196                    | 4.12                          | 11.73  | 0.44                              | 7.455              | 0.213   | 7.11            | 7.295  | 7.411           | 7.594                   | 7.987   |     |
| MTUS1  | ixh4aUCj59gF9h9fSo | rs406253   | 6.46                         |                      | 6.18                      | 0.132                    | 0.95                          | 16.28  | 0.165                             | 7.455              | 0.213   | 7.11            | 7.295  | 7.411           | 7.594                   | 7.987   |     |
| MTUS1  | ixh4aUCj59gF9h9fSo | rs3862100  | 8.96                         |                      | 8.55                      | -0.177                   | 3.25                          | 20.15  | 0.4875                            | 7.455              | 0.213   | 7.11            | 7.295  | 7.411           | 7.594                   | 7.987   |     |
| MTUS1  | ixh4aUCj59gF9h9fSo | rs6981770  | 8.17                         |                      | 7.80                      | -0.165                   | 2.99                          | 23.62  | 0.43                              | 7.455              | 0.213   | 7.11            | 7.295  | 7.411           | 7.594                   | 7.987   |     |
| MUC20  | Wnm8e54isVIK9U4Kkk | rs2291652  | 3.86                         |                      | 3.70                      | 0.073                    | 2.16                          | 17.37  | 0.42                              | 7.775              | 0.416   | 7.163           | 7.439  | 7.742           | 8.035                   | 9.328   |     |
| MUT    | BdX6Gllz37Tu6KrfFE | rs2501976  | 3.84                         |                      | 3.68                      | 0.075                    | 3.02                          | -28.01 | 0.3575                            | 9.188              | 0.203   | 8.619           | 9.052  | 9.17            | 9.298                   | 9.848   |     |
| MUT    | BdX6Gllz37Tu6KrfFE | rs2501979  | 3.82                         |                      | 3.66                      | -0.075                   | 2.98                          | -22.07 | 0.3568                            | 9.188              | 0.203   | 8.619           | 9.052  | 9.17            | 9.298                   | 9.848   |     |
| MUT    | BdX6Gllz37Tu6KrfFE | rs6458690  | 3.83                         |                      | 3.67                      | 0.075                    | 2.28                          | 12.62  | 0.3575                            | 9.188              | 0.203   | 8.619           | 9.052  | 9.17            | 9.298                   | 9.848   |     |
| MUT    | BdX6Gllz37Tu6KrfFE | rs4267943  | 3.62                         |                      | 3.47                      | -0.071                   | 2.48                          | 8.95   | 0.3503                            | 9.188              | 0.203   | 8.619           | 9.052  | 9.17            | 9.298                   | 9.848   |     |
| MUTYH  | N6vUArvK7XdbktoAJU | rs10890324 | 3.5                          |                      | 3.35                      | -0.064                   | 0.85                          | -3.76  | 0.2725                            | 10.093             | 0.358   | 9.265           | 9.811  | 10.135          | 10.356                  | 11.079  | Yes |
| MX1    | HFS7.KJOLiu7ubXtok | rs458966   | 4.73                         |                      | 4.52                      | -0.09                    | 0.94                          | -15.52 | 0.4325                            | 12.066             | 0.457   | 10.92           | 11.73  | 12.029          | 12.306                  | 14.483  |     |
| MX1    | HFS7.KJOLiu7ubXtok | rs459498   | 7.74                         |                      | 7.39                      | 0.15                     | 3.52                          | -3.13  | 0.39                              | 12.066             | 0.457   | 10.92           | 11.73  | 12.029          | 12.306                  | 14.483  |     |
| MX1    | HFS7.KJOLiu7ubXtok | rs466513   | 4.81                         |                      | 4.60                      | -0.095                   | 0.75                          | 3.46   | 0.4548                            | 12.066             | 0.457   | 10.92           | 11.73  | 12.029          | 12.306                  | 14.483  |     |
| MX1    | HFS7.KJOLiu7ubXtok | rs468105   | 5.37                         |                      | 5.13                      | 0.109                    | 1.82                          | 8.01   | 0.345                             | 12.066             | 0.457   | 10.92           | 11.73  | 12.029          | 12.306                  | 14.483  |     |
| MX1    | HFS7.KJOLiu7ubXtok | rs469083   | 6.01                         |                      | 5.74                      | 0.124                    | 2.45                          | 10.56  | 0.315                             | 12.066             | 0.457   | 10.92           | 11.73  | 12.029          | 12.306                  | 14.483  |     |
| MX1    | HFS7.KJOLiu7ubXtok | rs468646   | 4.65                         |                      | 4.45                      | 0.092                    | 0.88                          | 11.05  | 0.455                             | 12.066             | 0.457   | 10.92           | 11.73  | 12.029          | 12.306                  | 14.483  |     |
| MX1    | HFS7.KJOLiu7ubXtok | rs468440   | 5.37                         |                      | 5.13                      | 0.107                    | 2.53                          | 16.37  | 0.3775                            | 12.066             | 0.457   | 10.92           | 11.73  | 12.029          | 12.306                  | 14.483  |     |
| MX1    | HFS7.KJOLiu7ubXtok | rs469066   | 4.68                         |                      | 4.47                      | 0.093                    | 2.29                          | -15.12 | 0.2825                            | 12.066             | 0.457   | 10.92           | 11.73  | 12.029          | 12.306                  | 14.483  |     |
| MX1    | HFS7.KJOLiu7ubXtok | rs469382   | 3.97                         |                      | 3.80                      | -0.077                   | 1.4                           | -13.53 | 0.4625                            | 12.066             | 0.457   | 10.92           | 11.73  | 12.029          | 12.306                  | 14.483  |     |
| MX1    | HFS7.KJOLiu7ubXtok | rs469390   | 5.48                         |                      | 5.24                      | -0.108                   | 2.78                          | -13.21 | 0.3675                            | 12.066             | 0.457   | 10.92           | 11.73  | 12.029          | 12.306                  | 14.483  |     |
| MX1    | HFS7.KJOLiu7ubXtok | rs2070229  | 4.52                         |                      | 4.33                      | 0.087                    | 2.43                          | -10.03 | 0.2725                            | 12.066             | 0.457   | 10.92           | 11.73  | 12.029          | 12.306                  | 14.483  |     |
| MX1    | HFS7.KJOLiu7ubXtok | rs6517666  | 5.69                         |                      | 5.44                      | 0.111                    | 2.84                          | -9.1   | 0.3875                            | 12.066             | 0.457   | 10.92           | 11.73  | 12.029          | 12.306                  | 14.483  |     |
| MX1    | HFS7.KJOLiu7ubXtok | rs467798   | 5.46                         |                      | 5.22                      | 0.108                    | 2.59                          | -6.26  | 0.41                              | 12.066             | 0.457   | 10.92           | 11.73  | 12.029          | 12.306                  | 14.483  |     |
| MX1    | HFS7.KJOLiu7ubXtok | rs467593   | 4.1                          |                      | 3.92                      | -0.08                    | 2.09                          | -4.59  | 0.2825                            | 12.066             | 0.457   | 10.92           | 11.73  | 12.029          | 12.306                  | 14.483  |     |
| MX1    | HFS7.KJOLiu7ubXtok | rs1557372  | 4.76                         |                      | 4.55                      | -0.093                   | 2.47                          | 1.4    | 0.345                             | 12.066             | 0.457   | 10.92           | 11.73  | 12.029          | 12.306                  | 14.483  |     |
| MXRA7  | utdMU5K1T940VR6ShA | rs9897045  | 7.8                          |                      | 7.45                      | -0.152                   | 0.69                          | -9.76  | 0.2175                            | 7.379              | 0.242   | 7.108           | 7.222  | 7.294           | 7.445                   | 8.346   |     |
| MXRA7  | utdMU5K1T940VR6ShA | rs9910052  | 19.08                        |                      | 18.18                     | -0.35                    | 2.89                          | -3.01  | 0.1175                            | 7.379              | 0.242   | 7.108           | 7.222  | 7.294           | 7.445                   | 8.346   |     |
| MXRA7  | utdMU5K1T940VR6ShA | rs2286593  | 7.57                         |                      | 7.23                      | -0.151                   | 0.82                          | 9.63   | 0.2026                            | 7.379              | 0.242   | 7.108           | 7.222  | 7.294           | 7.445                   | 8.346   |     |
| MXRA7  | utdMU5K1T940VR6ShA | rs1005645  | 40.7                         |                      | 38.75                     | 0.616                    | 3.3                           | -10.3  | 0.085                             | 7.379              | 0.242   | 7.108           | 7.222  | 7.294           | 7.445                   | 8.346   |     |
| MXRA7  | utdMU5K1T940VR6ShA | rs1014390  | 25.76                        |                      | 24.54                     | -0.452                   | 3.07                          | 5.83   | 0.105                             | 7.379              | 0.242   | 7.108           | 7.222  | 7.294           | 7.445                   | 8.346   |     |
| MXRA7  | utdMU5K1T940VR6ShA | rs2240769  | 3.85                         |                      | 3.68                      | 0.075                    | 2.82                          | 11.1   | 0.325                             | 7.379              | 0.242   | 7.108           | 7.222  | 7.294           | 7.445                   | 8.346   |     |
| MYL4   | Hi.ICRNO0q4Ji9SuU  | rs16941635 | 7.93                         |                      | 7.57                      | -0.169                   | 1.42                          | -24.76 | 0.1237                            | 7.29               | 0.291   | 7.122           | 7.165  | 7.21            | 7.301                   | 10.396  |     |
| MYLIP  | 3k.6CetJySv96jtqIU | rs6921677  | 3.57                         |                      | 3.42                      | 0.069                    | 2.34                          | -30.37 | 0.24                              | 11.234             | 0.246   | 10.197          | 11.097 | 11.248          | 11.396                  | 11.875  |     |
| MYO5C  | NJHXLd6XujUuc97RQU | rs4405491  | 6.34                         |                      | 6.06                      | 0.128                    | 2.24                          | 31     | 0.145                             | 7.343              | 0.181   | 7.116           | 7.228  | 7.31            | 7.393                   | 8.199   |     |
| MYO5C  | NJHXLd6XujUuc97RQU | rs3825801  | 10.79                        |                      | 10.30                     | 0.216                    | 0.85                          | 33.2   | 0.1025                            | 7.343              | 0.181   | 7.116           | 7.228  | 7.31            | 7.393                   | 8.199   |     |
| MYO5C  | NJHXLd6XujUuc97RQU | rs3751631  | 7.77                         |                      | 7.42                      | 0.161                    | 2.69                          | 49.83  | 0.17                              | 7.343              | 0.181   | 7.116           | 7.228  | 7.31            | 7.393                   | 8.199   |     |
| MYO5C  | NJHXLd6XujUuc97RQU | rs8040562  | 10.72                        |                      | 10.23                     | -0.223                   | 2.14                          | -14.33 | 0.0779                            | 7.343              | 0.181   | 7.116           | 7.228  | 7.31            | 7.393                   | 8.199   |     |
| MYO5C  | NJHXLd6XujUuc97RQU | rs12594710 | 21.82                        |                      | 20.79                     | 0.416                    | 1.91                          | -6.51  | 0.05                              | 7.343              | 0.181   | 7.116           | 7.228  | 7.31            | 7.393                   | 8.199   |     |
| MYOM1  | Kpbt27vvEiuO5.2Gpk | rs4798075  | 7.78                         |                      | 7.43                      | 0.159                    | 2.88                          | 27.15  | 0.2075                            | 8.176              | 0.317   | 7.483           | 7.926  | 8.138           | 8.413                   | 9.393   |     |
| MYOM1  | Kpbt27vvEiuO5.2Gpk | rs717183   | 5.71                         |                      | 5.46                      | 0.121                    | 2.36                          | 32.82  | 0.2854                            | 8.176              | 0.317   | 7.483           | 7.926  | 8.138           | 8.413                   | 9.393   |     |
| MYOM1  | Kpbt27vvEiuO5.2Gpk | rs1662336  | 7.53                         |                      | 7.19                      | -0.155                   | 3.8                           | 43.28  | 0.1825                            | 8.176              | 0.317   | 7.483           | 7.926  | 8.138           | 8.413                   | 9.393   |     |
| MYOM2  | uP9GrupE6u6Rehu5JM | rs3779834  | 8.12                         |                      | 7.76                      | 0.164                    | 1.14                          | -32.97 | 0.1825                            | 9.065              | 0.954   | 7.271           | 8.338  | 8.922           | 9.735                   | 11.934  |     |
| MYOM2  | uP9GrupE6u6Rehu5JM | rs1866717  | 8.58                         |                      | 8.19                      | 0.171                    | 2.33                          | -32.83 | 0.385                             | 9.065              | 0.954   | 7.271           | 8.338  | 8.922           | 9.735                   | 11.934  |     |
| MYOM2  | uP9GrupE6u6Rehu5JM | rs6983960  | 8.52                         |                      | 8.14                      | -0.177                   | 2.91                          | -30.22 | 0.435                             | 9.065              | 0.954   | 7.271           | 8.338  | 8.922           | 9.735                   | 11.934  |     |
| MYOM2  | uP9GrupE6u6Rehu5JM | rs4876223  | 3.97                         |                      | 3.80                      | -0.083                   | 3.28                          | -28.29 | 0.3317                            | 9.065              | 0.954   | 7.271           | 8.338  | 8.922           | 9.735                   | 11.934  |     |
| MYOM2  | uP9GrupE6u6Rehu5JM | rs2280899  | 6.89                         |                      | 6.59                      | 0.146                    | 3.42                          | -21.04 | 0.3125                            | 9.065              | 0.954   | 7.271           | 8.338  | 8.922           | 9.735                   | 11.934  |     |
| MYOM2  | uP9GrupE6u6Rehu5JM | rs2280904  | 8.18                         |                      | 7.81                      | 0.164                    | 3.88                          | -2.2   | 0.28                              | 9.065              | 0.954   | 7.271           | 8.338  | 8.922           | 9.735                   | 11.934  |     |
| MYOM2  | uP9GrupE6u6Rehu5JM | rs10503170 | 5.49                         |                      | 5.25                      | 0.11                     | 1.42                          | -0.9   | 0.2275                            | 9.065              | 0.954   | 7.271           | 8.338  | 8.922           | 9.735                   | 11.934  |     |
| MYOM2  | uP9GrupE6u6Rehu5JM | rs9644319  | 8.41                         |                      | 8.03                      | -0.171                   | 3.82                          | 1.87   | 0.2828                            | 9.065              | 0.954   | 7.271           | 8.338  | 8.922           | 9.735                   | 11.934  |     |
| MYOM2  | uP9GrupE6u6Rehu5JM | rs9314453  | 18.35                        |                      | 17.49                     | 0.346                    | 4.79                          | 3.63   | 0.315                             | 9.065              | 0.954   | 7.271           | 8.338  | 8.922           | 9.735                   | 11.934  |     |
| MYOM2  | uP9GrupE6u6Rehu5JM | rs17752155 | 6.83                         |                      | 6.52                      | -0.138                   | 1.8                           | 3.87   | 0.1925                            | 9.065              | 0.954   | 7.271           | 8.338  | 8.922           | 9.735                   | 11.934  |     |
| MYOM2  | uP9GrupE6u6Rehu5JM | rs7013774  | 8.19                         |                      | 7.82                      | -0.166                   | 2.2                           | 4.18   | 0.125                             | 9.065              | 0.954   | 7.271           | 8.338  | 8.922           | 9.735                   | 11.934  |     |
| MYOM2  | uP9GrupE6u6Rehu5JM | rs4529490  | 19.79                        |                      | 18.86                     | -0.375                   | 6.43                          | 4.45   | 0.2125                            | 9.065              | 0.954   | 7.271           | 8.338  | 8.922           | 9.735                   | 11.934  |     |
| MYOM2  | uP9GrupE6u6Rehu5JM | rs12676956 | 8.15                         |                      | 7.78                      | 0.164                    | 4.06                          | 8.28   | 0.2825                            | 9.065              | 0.954   | 7.271           | 8.338  | 8.922           | 9.735                   | 11.934  |     |
| MYOM2  | uP9GrupE6u6Rehu5JM | rs17831401 | 15.15                        |                      | 14.44                     | 0.299                    | 3.97                          | 8.3    | 0.055                             | 9.065              | 0.954   | 7.271           | 8.338  | 8.922           | 9.735                   | 11.934  |     |
| MYOM2  | uP9GrupE6u6Rehu5JM | rs1866719  | 10.62                        |                      | 10.13                     | -0.218                   | 2.42                          | 10     | 0.1106                            | 9.065              | 0.954   | 7.271           | 8.338  | 8.922           | 9.735                   | 11.934  |     |
| MYOM2  | uP9GrupE6u6Rehu5JM | rs7828726  | 7.57                         |                      | 7.23                      | -0.153                   | 2.16                          | 11.35  | 0.1005                            | 9.065              | 0.954   | 7.271           | 8.338  | 8.922           | 9.735                   | 11.934  |     |

| Symbol | Lumi nuID          | SNP        | Population-based association |                           |                      | Family-based association |                               |        | Transcript abundance (log2 scale) |                    |         |                 |        |                 | SNP mapping under probe |         |
|--------|--------------------|------------|------------------------------|---------------------------|----------------------|--------------------------|-------------------------------|--------|-----------------------------------|--------------------|---------|-----------------|--------|-----------------|-------------------------|---------|
|        |                    |            | p-value (-log10)             | p-value (-log10), GC adj. | % Variance Explained | p-value (-log10)         | Distance from transcript (kb) | MAF    | Mean                              | Standard Deviation | Minimum | 25th percentile | Median | 75th percentile |                         | Maximum |
| MYOM2  | uP9GrupE6u6Rehu5JM | rs9644321  | 8.21                         | 7.84                      | 0.171                | 2.49                     | 11.8                          | 0.4217 | 9.065                             | 0.954              | 7.271   | 8.338           | 8.922  | 9.735           | 11.934                  |         |
| MYOM2  | uP9GrupE6u6Rehu5JM | rs10094743 | 8                            | 7.63                      | 0.162                | 2.47                     | 11.83                         | 0.103  | 9.065                             | 0.954              | 7.271   | 8.338           | 8.922  | 9.735           | 11.934                  |         |
| MYOM2  | uP9GrupE6u6Rehu5JM | rs10093876 | 7.78                         | 7.43                      | 0.158                | 2.16                     | 11.87                         | 0.101  | 9.065                             | 0.954              | 7.271   | 8.338           | 8.922  | 9.735           | 11.934                  |         |
| MYOM2  | uP9GrupE6u6Rehu5JM | rs9314454  | 15.04                        | 14.34                     | 0.295                | 5.22                     | 14.81                         | 0.1575 | 9.065                             | 0.954              | 7.271   | 8.338           | 8.922  | 9.735           | 11.934                  |         |
| MYOM2  | uP9GrupE6u6Rehu5JM | rs9314455  | 15.53                        | 14.80                     | 0.297                | 2.78                     | 15.68                         | 0.3275 | 9.065                             | 0.954              | 7.271   | 8.338           | 8.922  | 9.735           | 11.934                  |         |
| MYOM2  | uP9GrupE6u6Rehu5JM | rs1036688  | 14.16                        | 13.50                     | 0.278                | 4.42                     | 18.66                         | 0.1625 | 9.065                             | 0.954              | 7.271   | 8.338           | 8.922  | 9.735           | 11.934                  |         |
| MYOM2  | uP9GrupE6u6Rehu5JM | rs1036689  | 4.66                         | 4.45                      | 0.095                | 1.25                     | 18.75                         | 0.445  | 9.065                             | 0.954              | 7.271   | 8.338           | 8.922  | 9.735           | 11.934                  |         |
| MYOM2  | uP9GrupE6u6Rehu5JM | rs10100885 | 13.19                        | 12.58                     | -0.26                | 3.87                     | 23.86                         | 0.1575 | 9.065                             | 0.954              | 7.271   | 8.338           | 8.922  | 9.735           | 11.934                  |         |
| MYOM2  | uP9GrupE6u6Rehu5JM | rs2618814  | 5.65                         | 5.40                      | -0.12                | 2.45                     | 26.86                         | 0.4824 | 9.065                             | 0.954              | 7.271   | 8.338           | 8.922  | 9.735           | 11.934                  |         |
| MYOM2  | uP9GrupE6u6Rehu5JM | rs731869   | 6.08                         | 5.81                      | 0.122                | 3.37                     | 29.73                         | 0.295  | 9.065                             | 0.954              | 7.271   | 8.338           | 8.922  | 9.735           | 11.934                  |         |
| MYOM2  | uP9GrupE6u6Rehu5JM | rs11989864 | 4.82                         | 4.61                      | -0.094               | 1.1                      | 37.74                         | 0.13   | 9.065                             | 0.954              | 7.271   | 8.338           | 8.922  | 9.735           | 11.934                  |         |
| MYT1L  | WqVU_9MEkzk.VRZvu0 | rs6759577  | 10.2                         | 9.74                      | 0.199                | 5.52                     | -6.68                         | 0.3056 | 7.157                             | 0.107              | 7.099   | 7.111           | 7.12   | 7.157           | 8.171                   |         |
| MYT1L  | WqVU_9MEkzk.VRZvu0 | rs7588942  | 7.98                         | 7.62                      | 0.152                | 6.57                     | 6.81                          | 0.39   | 7.157                             | 0.107              | 7.099   | 7.111           | 7.12   | 7.157           | 8.171                   |         |
| MYT1L  | WqVU_9MEkzk.VRZvu0 | rs6548056  | 3.9                          | 3.73                      | -0.073               | 4.28                     | 20.44                         | 0.33   | 7.157                             | 0.107              | 7.099   | 7.111           | 7.12   | 7.157           | 8.171                   |         |
| MYT1L  | WqVU_9MEkzk.VRZvu0 | rs4853831  | 6.61                         | 6.32                      | 0.127                | 6.19                     | 20.78                         | 0.4425 | 7.157                             | 0.107              | 7.099   | 7.111           | 7.12   | 7.157           | 8.171                   |         |
| MYT1L  | WqVU_9MEkzk.VRZvu0 | rs4645032  | 8.02                         | 7.66                      | 0.156                | 6.94                     | 27.18                         | 0.425  | 7.157                             | 0.107              | 7.099   | 7.111           | 7.12   | 7.157           | 8.171                   |         |
| MYT1L  | WqVU_9MEkzk.VRZvu0 | rs6755207  | 3.61                         | 3.46                      | 0.066                | 0.73                     | 31.24                         | 0.06   | 7.157                             | 0.107              | 7.099   | 7.111           | 7.12   | 7.157           | 8.171                   |         |
| N4BP2  | 9is.Auf4hePTIVQKus | rs11737408 | 15.53                        | 14.80                     | -0.289               | 6.95                     | -49.91                        | 0.3075 | 8.226                             | 0.396              | 7.255   | 7.961           | 8.243  | 8.462           | 9.702                   |         |
| N4BP2  | 9is.Auf4hePTIVQKus | rs1706023  | 9.39                         | 8.97                      | -0.18                | 3.2                      | -24.11                        | 0.4213 | 8.226                             | 0.396              | 7.255   | 7.961           | 8.243  | 8.462           | 9.702                   |         |
| N4BP2  | 9is.Auf4hePTIVQKus | rs4974961  | 19.66                        | 18.74                     | 0.363                | 5.98                     | -1.29                         | 0.4075 | 8.226                             | 0.396              | 7.255   | 7.961           | 8.243  | 8.462           | 9.702                   |         |
| N4BP2  | 9is.Auf4hePTIVQKus | rs9993439  | 8.8                          | 8.40                      | 0.168                | 3.21                     | 3.51                          | 0.2764 | 8.226                             | 0.396              | 7.255   | 7.961           | 8.243  | 8.462           | 9.702                   |         |
| N4BP2  | 9is.Auf4hePTIVQKus | rs6531759  | 20.67                        | 19.70                     | -0.379               | 6.72                     | 5.94                          | 0.31   | 8.226                             | 0.396              | 7.255   | 7.961           | 8.243  | 8.462           | 9.702                   |         |
| NAE1   | f9dTE.hJ7epXzokxLo | rs363175   | 7.44                         | 7.11                      | -0.144               | 2.68                     | -9.23                         | 0.3525 | 7.321                             | 0.186              | 7.094   | 7.174           | 7.281  | 7.407           | 7.994                   | Yes     |
| NAE1   | f9dTE.hJ7epXzokxLo | rs422945   | 7.44                         | 7.11                      | 0.144                | 2.68                     | 1.75                          | 0.3525 | 7.321                             | 0.186              | 7.094   | 7.174           | 7.281  | 7.407           | 7.994                   | Yes     |
| NAE1   | f9dTE.hJ7epXzokxLo | rs187431   | 4.08                         | 3.91                      | 0.075                | 2.68                     | 41.99                         | 0.4875 | 7.321                             | 0.186              | 7.094   | 7.174           | 7.281  | 7.407           | 7.994                   | Yes     |
| NAE1   | f9dTE.hJ7epXzokxLo | rs149156   | 4.08                         | 3.91                      | 0.075                | 2.68                     | 47.83                         | 0.4875 | 7.321                             | 0.186              | 7.094   | 7.174           | 7.281  | 7.407           | 7.994                   | Yes     |
| NAGA   | EU6H6i_qlIvXofhQ8  | rs1801311  | 3.57                         | 3.42                      | 0.064                | 1.84                     | 19.95                         | 0.3125 | 8.212                             | 0.422              | 7.314   | 7.923           | 8.136  | 8.386           | 9.928                   |         |
| NAGA   | EU6H6i_qlIvXofhQ8  | rs2413669  | 3.57                         | 3.42                      | -0.064               | 1.86                     | 40.98                         | 0.3125 | 8.212                             | 0.422              | 7.314   | 7.923           | 8.136  | 8.386           | 9.928                   |         |
| NAGA   | EU6H6i_qlIvXofhQ8  | rs11090076 | 3.57                         | 3.42                      | 0.064                | 1.84                     | 47.42                         | 0.3125 | 8.212                             | 0.422              | 7.314   | 7.923           | 8.136  | 8.386           | 9.928                   |         |
| NAPRT1 | B1V4h2iap4egEEYNHQ | rs2290416  | 3.62                         | 3.46                      | 0.068                | 0.47                     | 0.64                          | 0.075  | 10.08                             | 0.59               | 7.853   | 9.798           | 10.193 | 10.413          | 11.655                  |         |
| NAPRT1 | B1V4h2iap4egEEYNHQ | rs1809148  | 36.14                        | 34.41                     | 0.567                | 6.05                     | 2.58                          | 0.14   | 10.08                             | 0.59               | 7.853   | 9.798           | 10.193 | 10.413          | 11.655                  |         |
| NAPRT1 | B1V4h2iap4egEEYNHQ | rs2123758  | 15.25                        | 14.54                     | -0.297               | 5.06                     | 3.17                          | 0.4091 | 10.08                             | 0.59               | 7.853   | 9.798           | 10.193 | 10.413          | 11.655                  |         |
| NAPRT1 | B1V4h2iap4egEEYNHQ | rs2382962  | 15.04                        | 14.34                     | -0.29                | 3.09                     | 8.9                           | 0.0779 | 10.08                             | 0.59               | 7.853   | 9.798           | 10.193 | 10.413          | 11.655                  |         |
| NAPRT1 | B1V4h2iap4egEEYNHQ | rs4874159  | 14.66                        | 13.98                     | 0.284                | 3.1                      | 10.46                         | 0.14   | 10.08                             | 0.59               | 7.853   | 9.798           | 10.193 | 10.413          | 11.655                  |         |
| NAPRT1 | B1V4h2iap4egEEYNHQ | rs4874164  | 14.66                        | 13.98                     | -0.284               | 3.1                      | 14.55                         | 0.14   | 10.08                             | 0.59               | 7.853   | 9.798           | 10.193 | 10.413          | 11.655                  |         |
| NAPRT1 | B1V4h2iap4egEEYNHQ | rs896962   | 5.6                          | 5.35                      | 0.108                | 1.57                     | 26.6                          | 0.15   | 10.08                             | 0.59               | 7.853   | 9.798           | 10.193 | 10.413          | 11.655                  |         |
| NAPRT1 | B1V4h2iap4egEEYNHQ | rs2242089  | 4.27                         | 4.08                      | -0.08                | 1.65                     | 28.65                         | 0.18   | 10.08                             | 0.59               | 7.853   | 9.798           | 10.193 | 10.413          | 11.655                  |         |
| NAPRT1 | B1V4h2iap4egEEYNHQ | rs2045084  | 4.31                         | 4.13                      | 0.084                | 0.31                     | 33.35                         | 0.3825 | 10.08                             | 0.59               | 7.853   | 9.798           | 10.193 | 10.413          | 11.655                  |         |
| NAPRT1 | B1V4h2iap4egEEYNHQ | rs4873809  | 6.31                         | 6.03                      | -0.13                | 0.9                      | 33.57                         | 0.2474 | 10.08                             | 0.59               | 7.853   | 9.798           | 10.193 | 10.413          | 11.655                  |         |
| NARFL  | W4plklavdFXh96KfV8 | rs12448432 | 3.66                         | 3.50                      | -0.071               | 1.12                     | -0.95                         | 0.215  | 7.814                             | 0.289              | 7.365   | 7.628           | 7.736  | 7.919           | 8.935                   |         |
| NBPF3  | rG9EYc7JE5ai43IIT0 | rs12118362 | 6.27                         | 6.00                      | 0.127                | 3.7                      | 5.37                          | 0.2437 | 7.438                             | 0.173              | 7.108   | 7.299           | 7.441  | 7.575           | 7.98                    |         |
| NBPF3  | rG9EYc7JE5ai43IIT0 | rs4654748  | 6.65                         | 6.36                      | -0.136               | 1.9                      | 19.44                         | 0.45   | 7.438                             | 0.173              | 7.108   | 7.299           | 7.441  | 7.575           | 7.98                    |         |
| NBPF3  | rG9EYc7JE5ai43IIT0 | rs1827293  | 8.11                         | 7.75                      | -0.166               | 1.51                     | -16                           | 0.48   | 7.438                             | 0.173              | 7.108   | 7.299           | 7.441  | 7.575           | 7.98                    |         |
| NBPF3  | rG9EYc7JE5ai43IIT0 | rs7537914  | 3.84                         | 3.68                      | -0.075               | 0.93                     | -14.78                        | 0.315  | 7.438                             | 0.173              | 7.108   | 7.299           | 7.441  | 7.575           | 7.98                    |         |
| NBPF3  | rG9EYc7JE5ai43IIT0 | rs4654947  | 3.93                         | 3.76                      | -0.078               | 2.03                     | -6.34                         | 0.2889 | 7.438                             | 0.173              | 7.108   | 7.299           | 7.441  | 7.575           | 7.98                    |         |
| NBPF3  | rG9EYc7JE5ai43IIT0 | rs1780324  | 10.11                        | 9.64                      | -0.203               | 3.78                     | 10.36                         | 0.495  | 7.438                             | 0.173              | 7.108   | 7.299           | 7.441  | 7.575           | 7.98                    |         |
| NBPF3  | rG9EYc7JE5ai43IIT0 | rs10799702 | 6.98                         | 6.66                      | 0.141                | 2.31                     | 10.49                         | 0.4575 | 7.438                             | 0.173              | 7.108   | 7.299           | 7.441  | 7.575           | 7.98                    |         |
| NBPF3  | rG9EYc7JE5ai43IIT0 | rs1697421  | 6.76                         | 6.46                      | -0.136               | 3.12                     | 11.9                          | 0.465  | 7.438                             | 0.173              | 7.108   | 7.299           | 7.441  | 7.575           | 7.98                    |         |
| NCAPD2 | WjXKC3vXtdXuSrNeyo | rs2532501  | 10.84                        | 10.35                     | -0.218               | 2.97                     | -40.55                        | 0.2975 | 9.725                             | 0.385              | 8.661   | 9.469           | 9.686  | 9.911           | 11.237                  |         |
| NCAPD2 | WjXKC3vXtdXuSrNeyo | rs12964    | 6.4                          | 6.11                      | 0.127                | 2.59                     | -31.11                        | 0.4925 | 9.725                             | 0.385              | 8.661   | 9.469           | 9.686  | 9.911           | 11.237                  |         |
| NCAPD2 | WjXKC3vXtdXuSrNeyo | rs1048402  | 12.5                         | 11.93                     | 0.248                | 4                        | -2.12                         | 0.2825 | 9.725                             | 0.385              | 8.661   | 9.469           | 9.686  | 9.911           | 11.237                  |         |
| NCAPD2 | WjXKC3vXtdXuSrNeyo | rs7134136  | 13                           | 12.40                     | 0.258                | 3.86                     | 6.2                           | 0.2825 | 9.725                             | 0.385              | 8.661   | 9.469           | 9.686  | 9.911           | 11.237                  |         |
| NCAPD2 | WjXKC3vXtdXuSrNeyo | rs7298053  | 5.18                         | 4.95                      | 0.1                  | 2.21                     | 15.75                         | 0.4125 | 9.725                             | 0.385              | 8.661   | 9.469           | 9.686  | 9.911           | 11.237                  |         |
| NCAPD2 | WjXKC3vXtdXuSrNeyo | rs917634   | 4.62                         | 4.42                      | -0.09                | 1.04                     | -9.64                         | 0.4775 | 9.725                             | 0.385              | 8.661   | 9.469           | 9.686  | 9.911           | 11.237                  |         |
| NCAPD2 | WjXKC3vXtdXuSrNeyo | rs740851   | 5.01                         | 4.79                      | -0.097               | 1.99                     | -24.26                        | 0.415  | 9.725                             | 0.385              | 8.661   | 9.469           | 9.686  | 9.911           | 11.237                  |         |
| NCAPD2 | WjXKC3vXtdXuSrNeyo | rs1558333  | 5.62                         | 5.38                      | -0.11                | 3.08                     | -3.46                         | 0.1625 | 9.725                             | 0.385              | 8.661   | 9.469           | 9.686  | 9.911           | 11.237                  |         |
| NCNF4  | Tu1eiS4qhFJABFSd0g | rs5756379  | 4.27                         | 4.08                      | -0.077               | 2.38                     | 1.84                          | 0.34   | 8.611                             | 0.417              | 7.514   | 8.341           | 8.539  | 8.876           | 10.214                  | Yes     |
| NCKAP1 | QhwhU65XvpPJHFPsV4 | rs4392211  | 4.94                         | 4.73                      | 0.096                | 1.49                     | -9.2                          | 0.2425 | 8.256                             | 0.228              | 7.621   | 8.12            | 8.248  | 8.405           | 8.928                   |         |
| NCKAP1 | QhwhU65XvpPJHFPsV4 | rs9333280  | 4.94                         | 4.73                      | -0.096               | 1.49                     | 3.79                          | 0.2425 | 8.256                             | 0.228              | 7.621   | 8.12            | 8.248  | 8.405           | 8.928                   |         |
| NCKAP1 | QhwhU65XvpPJHFPsV4 | rs7595898  | 4.1                          | 3.92                      | -0.08                | 1.58                     | 30.29                         | 0.0875 | 8.256                             | 0.228              | 7.621   | 8.12            | 8.248  | 8.405           | 8.928                   |         |
| NCKAP1 | QhwhU65XvpPJHFPsV4 | rs17265880 | 4.39                         | 4.20                      | -0.085               | 1.76                     | -53.22                        | 0.15   | 8.256                             | 0.228              | 7.621   | 8.12            | 8.248  | 8.405           | 8.928                   |         |
| NCLN   | Et6p0p67qOSWljiAMA | rs550581   | 4.06                         | 3.89                      | -0.079               | 1.01                     | 5.73                          | 0.3975 | 10.119                            | 0.432              | 8.847   | 9.862           | 10.073 | 10.391          | 11.141                  |         |



| Symbol | Lumi nuID          | SNP        | Population-based             | Population-based                      | % Variance Explained | Family-based                 | Distance from transcript (kb) | MAF    | Transcript abundance (log2 scale) |                    |         |                 |        | SNP mapping under probe |                 |         |
|--------|--------------------|------------|------------------------------|---------------------------------------|----------------------|------------------------------|-------------------------------|--------|-----------------------------------|--------------------|---------|-----------------|--------|-------------------------|-----------------|---------|
|        |                    |            | association p-value (-log10) | association p-value (-log10), GC adj. |                      | association p-value (-log10) |                               |        | Mean                              | Standard Deviation | Minimum | 25th percentile | Median |                         | 75th percentile | Maximum |
| NCOA3  | 9UTgOHZqo64nuHn_eE | rs1569438  | 3.29                         | 3.15                                  | -0.064               | 1.72                         | 55.91                         | 0.125  | 10.277                            | 0.392              | 8.498   | 10.015          | 10.262 | 10.523                  | 11.233          |         |
| NCOA7  | WeyXq7G.R0L3XHih34 | rs622936   | 5.37                         | 5.14                                  | 0.106                | 2.27                         | 44.4                          | 0.3166 | 10.044                            | 0.235              | 9.398   | 9.876           | 10.022 | 10.235                  | 10.602          |         |
| NCOA7  | WeyXq7G.R0L3XHih34 | rs9401850  | 5.44                         | 5.20                                  | 0.103                | 1.24                         | 48.69                         | 0.4086 | 10.044                            | 0.235              | 9.398   | 9.876           | 10.022 | 10.235                  | 10.602          |         |
| NCOA7  | WeyXq7G.R0L3XHih34 | rs490361   | 5.34                         | 5.10                                  | -0.105               | 2.42                         | 50.95                         | 0.3141 | 10.044                            | 0.235              | 9.398   | 9.876           | 10.022 | 10.235                  | 10.602          |         |
| NCOA7  | WeyXq7G.R0L3XHih34 | rs9321057  | 5.49                         | 5.25                                  | 0.103                | 1.69                         | 54.64                         | 0.41   | 10.044                            | 0.235              | 9.398   | 9.876           | 10.022 | 10.235                  | 10.602          |         |
| NCOA7  | WeyXq7G.R0L3XHih34 | rs584032   | 7.41                         | 7.08                                  | -0.14                | 2.84                         | 62.7                          | 0.43   | 10.044                            | 0.235              | 9.398   | 9.876           | 10.022 | 10.235                  | 10.602          |         |
| NCOA7  | WeyXq7G.R0L3XHih34 | rs9401851  | 3.29                         | 3.15                                  | 0.06                 | 1.22                         | -70.3                         | 0.4721 | 10.044                            | 0.235              | 9.398   | 9.876           | 10.022 | 10.235                  | 10.602          |         |
| NCOA7  | WeyXq7G.R0L3XHih34 | rs17745584 | 3.44                         | 3.29                                  | 0.062                | 2.57                         | -56.12                        | 0.13   | 10.044                            | 0.235              | 9.398   | 9.876           | 10.022 | 10.235                  | 10.602          |         |
| NCOA7  | WeyXq7G.R0L3XHih34 | rs9401855  | 3.35                         | 3.20                                  | 0.06                 | 3.55                         | -20.19                        | 0.4196 | 10.044                            | 0.235              | 9.398   | 9.876           | 10.022 | 10.235                  | 10.602          |         |
| NCR3   | NKVETFd96e8qifq1eA | rs2844509  | 6.03                         | 5.77                                  | -0.116               | 1.81                         | -45.75                        | 0.2325 | 9.196                             | 0.523              | 7.446   | 8.927           | 9.199  | 9.579                   | 10.706          |         |
| NCR3   | NKVETFd96e8qifq1eA | rs2239705  | 8.94                         | 8.54                                  | 0.174                | 1.97                         | -43.27                        | 0.175  | 9.196                             | 0.523              | 7.446   | 8.927           | 9.199  | 9.579                   | 10.706          |         |
| NCR3   | NKVETFd96e8qifq1eA | rs6916921  | 19.67                        | 18.74                                 | -0.348               | 3.03                         | -36.25                        | 0.105  | 9.196                             | 0.523              | 7.446   | 8.927           | 9.199  | 9.579                   | 10.706          |         |
| NCR3   | NKVETFd96e8qifq1eA | rs986475   | 21.49                        | 20.48                                 | -0.373               | 3.28                         | 0.04                          | 0.1025 | 9.196                             | 0.523              | 7.446   | 8.927           | 9.199  | 9.579                   | 10.706          |         |
| NCR3   | NKVETFd96e8qifq1eA | rs2260000  | 3.49                         | 3.36                                  | -0.064               | 0.16                         | 32.71                         | 0.3668 | 9.196                             | 0.523              | 7.446   | 8.927           | 9.199  | 9.579                   | 10.706          |         |
| NDRG1  | BFV6X4sgC2qNqkling | rs7013213  | 3.51                         | 3.34                                  | 0.067                | 2.56                         | 18.89                         | 0.3141 | 10.326                            | 0.288              | 9.423   | 10.13           | 10.347 | 10.531                  | 11.178          |         |
| NDRG1  | BFV6X4sgC2qNqkling | rs13255915 | 3.53                         | 3.38                                  | -0.068               | 2.28                         | 19.49                         | 0.315  | 10.326                            | 0.288              | 9.423   | 10.13           | 10.347 | 10.531                  | 11.178          |         |
| NDRG1  | BFV6X4sgC2qNqkling | rs16904891 | 3.36                         | 3.22                                  | 0.063                | 0.41                         | 22.56                         | 0.1725 | 10.326                            | 0.288              | 9.423   | 10.13           | 10.347 | 10.531                  | 11.178          |         |
| NDUFA3 | EIECOnmtpI9dCDI6g  | rs254259   | 4.35                         | 4.17                                  | 0.079                | 2.32                         | 0.24                          | 0.42   | 11.999                            | 0.365              | 9.627   | 11.823          | 12.047 | 12.244                  | 12.677          |         |
| NDUFA7 | ceeyeUellKa4dSddUw | rs1019757  | 3.34                         | 3.20                                  | 0.063                | 0.81                         | 3.25                          | 0.236  | 9.976                             | 0.333              | 8.933   | 9.803           | 9.992  | 10.202                  | 10.953          | Yes     |
| NDUFB1 | QgAss4.nptFXedbmpk | rs3814833  | 15.52                        | 14.80                                 | -0.294               | 5.4                          | 1.11                          | 0.32   | 7.333                             | 0.134              | 7.132   | 7.236           | 7.302  | 7.399                   | 8.052           |         |
| NDUFB1 | QgAss4.nptFXedbmpk | rs12586783 | 5.55                         | 5.30                                  | -0.107               | 3.55                         | 1.99                          | 0.1375 | 7.333                             | 0.134              | 7.132   | 7.236           | 7.302  | 7.399                   | 8.052           |         |
| NDUFB1 | QgAss4.nptFXedbmpk | rs4548800  | 5.38                         | 5.14                                  | -0.103               | 1.48                         | -1.59                         | 0.1591 | 7.333                             | 0.134              | 7.132   | 7.236           | 7.302  | 7.399                   | 8.052           |         |
| NDUFB1 | QgAss4.nptFXedbmpk | rs2295726  | 3.86                         | 3.70                                  | -0.075               | 0.08                         | 12.64                         | 0.171  | 7.333                             | 0.134              | 7.132   | 7.236           | 7.302  | 7.399                   | 8.052           |         |
| NDUFB1 | QgAss4.nptFXedbmpk | rs2025072  | 6.5                          | 6.21                                  | -0.129               | 2.12                         | 38.98                         | 0.397  | 7.333                             | 0.134              | 7.132   | 7.236           | 7.302  | 7.399                   | 8.052           |         |
| NDUFS4 | cq_pNBp41fNQTr3BfQ | rs11743262 | 4.97                         | 4.76                                  | -0.094               | 1.97                         | 59.54                         | 0.1382 | 11.034                            | 0.21               | 10.413  | 10.917          | 11.06  | 11.164                  | 11.613          |         |
| NDUFS4 | cq_pNBp41fNQTr3BfQ | rs2124948  | 3.36                         | 3.22                                  | 0.063                | 0.99                         | -50.78                        | 0.485  | 11.034                            | 0.21               | 10.413  | 10.917          | 11.06  | 11.164                  | 11.613          |         |
| NDUFS4 | cq_pNBp41fNQTr3BfQ | rs10513019 | 5                            | 4.78                                  | -0.095               | 1.99                         | -34.74                        | 0.14   | 11.034                            | 0.21               | 10.413  | 10.917          | 11.06  | 11.164                  | 11.613          |         |
| NDUFS4 | cq_pNBp41fNQTr3BfQ | rs4147739  | 4.89                         | 4.67                                  | -0.093               | 2.08                         | -12.15                        | 0.1407 | 11.034                            | 0.21               | 10.413  | 10.917          | 11.06  | 11.164                  | 11.613          |         |
| NDUFS4 | cq_pNBp41fNQTr3BfQ | rs2290697  | 3.36                         | 3.22                                  | 0.063                | 1.06                         | -0.45                         | 0.485  | 11.034                            | 0.21               | 10.413  | 10.917          | 11.06  | 11.164                  | 11.613          |         |
| NDUFS5 | 9Q1luuBJXEI6etjOc  | rs10886650 | 5.36                         | 5.13                                  | -0.108               | 1.96                         | 6.87                          | 0.3275 | 12.117                            | 0.349              | 9.699   | 11.96           | 12.18  | 12.33                   | 12.711          |         |
| NEFH   | NrQlfSj3c96CJrUro  | rs13054354 | 3.74                         | 3.58                                  | 0.074                | 3                            | -36.04                        | 0.1809 | 7.516                             | 0.184              | 7.157   | 7.385           | 7.491  | 7.626                   | 8.299           |         |
| NEFH   | NrQlfSj3c96CJrUro  | rs13053817 | 3.53                         | 3.39                                  | 0.069                | 2.74                         | -28.5                         | 0.1825 | 7.516                             | 0.184              | 7.157   | 7.385           | 7.491  | 7.626                   | 8.299           |         |
| NEFH   | NrQlfSj3c96CJrUro  | rs165607   | 3.68                         | 3.53                                  | 0.073                | 0.6                          | 1.2                           | 0.1425 | 7.516                             | 0.184              | 7.157   | 7.385           | 7.491  | 7.626                   | 8.299           |         |
| NEFH   | NrQlfSj3c96CJrUro  | rs165821   | 3.78                         | 3.62                                  | 0.075                | 0.52                         | 1.41                          | 0.1432 | 7.516                             | 0.184              | 7.157   | 7.385           | 7.491  | 7.626                   | 8.299           |         |
| NEFH   | NrQlfSj3c96CJrUro  | rs3815335  | 4.18                         | 4.00                                  | 0.085                | 1.06                         | 5.25                          | 0.3425 | 7.516                             | 0.184              | 7.157   | 7.385           | 7.491  | 7.626                   | 8.299           |         |
| NEFH   | NrQlfSj3c96CJrUro  | rs2008880  | 3.6                          | 3.45                                  | -0.071               | 1.19                         | 26.52                         | 0.135  | 7.516                             | 0.184              | 7.157   | 7.385           | 7.491  | 7.626                   | 8.299           |         |
| NEIL2  | oeijUqOKMi6XiJLn6M | rs10503426 | 4.05                         | 3.87                                  | -0.076               | 3.47                         | -37.87                        | 0.4648 | 8.826                             | 0.299              | 8.104   | 8.614           | 8.846  | 9.005                   | 9.742           |         |
| NEIL2  | oeijUqOKMi6XiJLn6M | rs2898295  | 3.48                         | 3.33                                  | 0.065                | 2.76                         | -31.29                        | 0.4975 | 8.826                             | 0.299              | 8.104   | 8.614           | 8.846  | 9.005                   | 9.742           |         |
| NEIL2  | oeijUqOKMi6XiJLn6M | rs2029969  | 3.78                         | 3.62                                  | 0.071                | 2.52                         | -22.4                         | 0.35   | 8.826                             | 0.299              | 8.104   | 8.614           | 8.846  | 9.005                   | 9.742           |         |
| NEIL2  | oeijUqOKMi6XiJLn6M | rs3735814  | 6.56                         | 6.27                                  | -0.132               | 3.61                         | -19.86                        | 0.445  | 8.826                             | 0.299              | 8.104   | 8.614           | 8.846  | 9.005                   | 9.742           |         |
| NEIL2  | oeijUqOKMi6XiJLn6M | rs13273672 | 4.16                         | 3.98                                  | -0.08                | 2.17                         | -14.88                        | 0.29   | 8.826                             | 0.299              | 8.104   | 8.614           | 8.846  | 9.005                   | 9.742           |         |
| NEIL2  | oeijUqOKMi6XiJLn6M | rs804280   | 7.09                         | 6.77                                  | -0.143               | 3.8                          | -14.56                        | 0.47   | 8.826                             | 0.299              | 8.104   | 8.614           | 8.846  | 9.005                   | 9.742           |         |
| NEIL2  | oeijUqOKMi6XiJLn6M | rs1062219  | 4.44                         | 4.25                                  | -0.09                | 3.13                         | -10.85                        | 0.4949 | 8.826                             | 0.299              | 8.104   | 8.614           | 8.846  | 9.005                   | 9.742           |         |
| NEIL2  | oeijUqOKMi6XiJLn6M | rs809204   | 3.41                         | 3.26                                  | 0.065                | 3.69                         | -8.09                         | 0.3    | 8.826                             | 0.299              | 8.104   | 8.614           | 8.846  | 9.005                   | 9.742           |         |
| NEIL2  | oeijUqOKMi6XiJLn6M | rs1466785  | 4.73                         | 4.52                                  | 0.094                | 3.17                         | -3.8                          | 0.3869 | 8.826                             | 0.299              | 8.104   | 8.614           | 8.846  | 9.005                   | 9.742           |         |
| NEIL2  | oeijUqOKMi6XiJLn6M | rs804267   | 3.49                         | 3.34                                  | -0.067               | 1.45                         | 1.98                          | 0.3775 | 8.826                             | 0.299              | 8.104   | 8.614           | 8.846  | 9.005                   | 9.742           |         |
| NEIL2  | oeijUqOKMi6XiJLn6M | rs2686187  | 4.1                          | 3.92                                  | -0.08                | 2.55                         | 9.94                          | 0.3675 | 8.826                             | 0.299              | 8.104   | 8.614           | 8.846  | 9.005                   | 9.742           |         |
| NEK11  | Nh3JcQTnicSVIjSE5c | rs13093185 | 6.64                         | 6.32                                  | -0.128               | 1.39                         | -16.24                        | 0.1925 | 7.327                             | 0.112              | 7.145   | 7.242           | 7.307  | 7.385                   | 7.723           |         |
| NEK11  | Nh3JcQTnicSVIjSE5c | rs218503   | 4.45                         | 4.26                                  | -0.084               | 1.67                         | -8.1                          | 0.27   | 7.327                             | 0.112              | 7.145   | 7.242           | 7.307  | 7.385                   | 7.723           |         |
| NEK11  | Nh3JcQTnicSVIjSE5c | rs903046   | 7.98                         | 7.62                                  | -0.155               | 1.62                         | 9.4                           | 0.205  | 7.327                             | 0.112              | 7.145   | 7.242           | 7.307  | 7.385                   | 7.723           |         |
| NEK11  | Nh3JcQTnicSVIjSE5c | rs10512798 | 7.98                         | 7.62                                  | 0.155                | 1.43                         | 40.6                          | 0.205  | 7.327                             | 0.112              | 7.145   | 7.242           | 7.307  | 7.385                   | 7.723           |         |
| NEK11  | Nh3JcQTnicSVIjSE5c | rs7634905  | 7.47                         | 7.13                                  | -0.145               | 1.2                          | 81.28                         | 0.2075 | 7.327                             | 0.112              | 7.145   | 7.242           | 7.307  | 7.385                   | 7.723           |         |
| NEK11  | Nh3JcQTnicSVIjSE5c | rs2718872  | 7.36                         | 7.03                                  | 0.143                | 1.09                         | 126.32                        | 0.21   | 7.327                             | 0.112              | 7.145   | 7.242           | 7.307  | 7.385                   | 7.723           |         |
| NEK11  | Nh3JcQTnicSVIjSE5c | rs9868843  | 3.43                         | 3.29                                  | 0.065                | 1.04                         | -137.31                       | 0.4162 | 7.327                             | 0.112              | 7.145   | 7.242           | 7.307  | 7.385                   | 7.723           |         |
| NEK11  | Nh3JcQTnicSVIjSE5c | rs6768031  | 3.96                         | 3.79                                  | -0.073               | 1.94                         | -118.16                       | 0.2375 | 7.327                             | 0.112              | 7.145   | 7.242           | 7.307  | 7.385                   | 7.723           |         |
| NEK11  | Nh3JcQTnicSVIjSE5c | rs6439279  | 4.16                         | 3.98                                  | 0.078                | 2.05                         | -60.17                        | 0.2325 | 7.327                             | 0.112              | 7.145   | 7.242           | 7.307  | 7.385                   | 7.723           |         |
| NEK11  | Nh3JcQTnicSVIjSE5c | rs4429602  | 4.21                         | 4.03                                  | -0.079               | 0.83                         | 44.43                         | 0.075  | 7.327                             | 0.112              | 7.145   | 7.242           | 7.307  | 7.385                   | 7.723           |         |
| NELL2  | EW4TXgV6MgJeJU_je4 | rs2408085  | 7.02                         | 6.71                                  | -0.136               | 4.85                         | -38.75                        | 0.14   | 11.197                            | 0.456              | 9.6     | 10.929          | 11.263 | 11.501                  | 12.115          |         |
| NELL2  | EW4TXgV6MgJeJU_je4 | rs2710455  | 6.89                         | 6.58                                  | 0.133                | 4.8                          | -21.03                        | 0.1375 | 11.197                            | 0.456              | 9.6     | 10.929          | 11.263 | 11.501                  | 12.115          |         |
| NELL2  | EW4TXgV6MgJeJU_je4 | rs2710459  | 7.59                         | 7.25                                  | -0.145               | 5.05                         | -19.03                        | 0.15   | 11.197                            | 0.456              | 9.6     | 10.929          | 11.263 | 11.501                  | 12.115          |         |
| NELL2  | EW4TXgV6MgJeJU_je4 | rs1506681  | 6.77                         | 6.47                                  | -0.131               | 4.95                         | 19.46                         | 0.1364 | 11.197                            | 0.456              | 9.6     | 10.929          | 11.263 | 11.501                  | 12.115          |         |
| NELL2  | EW4TXgV6MgJeJU_je4 | rs1039669  | 6.89                         | 6.58                                  | 0.133                | 4.8                          | 42.94                         | 0.1375 | 11.197                            | 0.456              | 9.6     | 10.929          | 11.263 | 11.501                  | 12.115          |         |

| Symbol | Lumi nuID          | SNP        | Population-based             | Population-based                      | % Variance Explained | Family-based                 | Distance from transcript (kb) | MAF    | Mean   | Transcript abundance (log2 scale) |         |                 |        |                 | SNP mapping under probe |
|--------|--------------------|------------|------------------------------|---------------------------------------|----------------------|------------------------------|-------------------------------|--------|--------|-----------------------------------|---------|-----------------|--------|-----------------|-------------------------|
|        |                    |            | association p-value (-log10) | association p-value (-log10), GC adj. |                      | association p-value (-log10) |                               |        |        | Standard Deviation                | Minimum | 25th percentile | Median | 75th percentile |                         |
| NFE2L3 | ThQrKUIDVBRzndS7FQ | rs3814095  | 15.66                        | 14.93                                 | -0.293               | 3.3                          | -44.64                        | 0.16   | 8.215  | 0.244                             | 7.167   | 8.055           | 8.236  | 8.38            | 8.704                   |
| NFE2L3 | ThQrKUIDVBRzndS7FQ | rs6973742  | 5.03                         | 4.81                                  | -0.096               | 1.8                          | -40.67                        | 0.395  | 8.215  | 0.244                             | 7.167   | 8.055           | 8.236  | 8.38            | 8.704                   |
| NFE2L3 | ThQrKUIDVBRzndS7FQ | rs2057763  | 15.98                        | 15.24                                 | 0.297                | 3.38                         | -36.46                        | 0.155  | 8.215  | 0.244                             | 7.167   | 8.055           | 8.236  | 8.38            | 8.704                   |
| NFE2L3 | ThQrKUIDVBRzndS7FQ | rs2107348  | 15.66                        | 14.93                                 | -0.293               | 3.3                          | -36.35                        | 0.16   | 8.215  | 0.244                             | 7.167   | 8.055           | 8.236  | 8.38            | 8.704                   |
| NINJ2  | IKULEVp8KOeveHcVR4 | rs9861     | 3.37                         | 3.23                                  | -0.064               | 1.46                         | -1.09                         | 0.3492 | 9.492  | 0.48                              | 8.174   | 9.154           | 9.525  | 9.794           | 10.794                  |
| NINJ2  | IKULEVp8KOeveHcVR4 | rs2607916  | 3.58                         | 3.42                                  | 0.068                | 2.1                          | 43.05                         | 0.24   | 9.492  | 0.48                              | 8.174   | 9.154           | 9.525  | 9.794           | 10.794                  |
| NINJ2  | IKULEVp8KOeveHcVR4 | rs1471132  | 5.4                          | 5.16                                  | 0.104                | 4.48                         | -21.45                        | 0.3475 | 9.492  | 0.48                              | 8.174   | 9.154           | 9.525  | 9.794           | 10.794                  |
| NINJ2  | IKULEVp8KOeveHcVR4 | rs10744703 | 4.83                         | 4.62                                  | -0.094               | 3.57                         | -1.53                         | 0.365  | 9.492  | 0.48                              | 8.174   | 9.154           | 9.525  | 9.794           | 10.794                  |
| NINJ2  | IKULEVp8KOeveHcVR4 | rs17754970 | 4.88                         | 4.67                                  | -0.098               | 3.11                         | 0.51                          | 0.21   | 9.492  | 0.48                              | 8.174   | 9.154           | 9.525  | 9.794           | 10.794                  |
| NINJ2  | IKULEVp8KOeveHcVR4 | rs3809263  | 9.29                         | 8.86                                  | -0.185               | 7.34                         | 0.7                           | 0.385  | 9.492  | 0.48                              | 8.174   | 9.154           | 9.525  | 9.794           | 10.794                  |
| NINJ2  | IKULEVp8KOeveHcVR4 | rs7298096  | 9.82                         | 9.37                                  | 0.198                | 5.76                         | 3.72                          | 0.4125 | 9.492  | 0.48                              | 8.174   | 9.154           | 9.525  | 9.794           | 10.794                  |
| NKX2-3 | cj7aqGSh32KAFJYOI0 | rs9665572  | 3.36                         | 3.22                                  | -0.062               | 0.51                         | -42.36                        | 0.2475 | 7.137  | 0.02                              | 7.106   | 7.123           | 7.133  | 7.146           | 7.248                   |
| NKX2-3 | cj7aqGSh32KAFJYOI0 | rs10736142 | 3.5                          | 3.35                                  | 0.066                | 0.6                          | -31.66                        | 0.2462 | 7.137  | 0.02                              | 7.106   | 7.123           | 7.133  | 7.146           | 7.248                   |
| NLP    | QmxET11Ap9HZ6gbQVI | rs2500406  | 3.65                         | 3.49                                  | -0.07                | 1.55                         | -31.48                        | 0.3392 | 7.184  | 0.057                             | 7.108   | 7.143           | 7.172  | 7.204           | 7.445                   |
| NLP    | QmxET11Ap9HZ6gbQVI | rs3764694  | 12.73                        | 12.14                                 | 0.251                | 3.42                         | -10.85                        | 0.1425 | 7.184  | 0.057                             | 7.108   | 7.143           | 7.172  | 7.204           | 7.445                   |
| NLP    | QmxET11Ap9HZ6gbQVI | rs2281212  | 12.06                        | 11.51                                 | 0.237                | 3.57                         | 32.25                         | 0.175  | 7.184  | 0.057                             | 7.108   | 7.143           | 7.172  | 7.204           | 7.445                   |
| NLP    | QmxET11Ap9HZ6gbQVI | rs6050690  | 7.92                         | 7.57                                  | -0.159               | 2.5                          | -0.91                         | 0.2225 | 7.184  | 0.057                             | 7.108   | 7.143           | 7.172  | 7.204           | 7.445                   |
| NLP    | QmxET11Ap9HZ6gbQVI | rs6115227  | 7.2                          | 6.88                                  | 0.146                | 2.93                         | 25.22                         | 0.25   | 7.184  | 0.057                             | 7.108   | 7.143           | 7.172  | 7.204           | 7.445                   |
| NLP    | QmxET11Ap9HZ6gbQVI | rs11700338 | 12.6                         | 12.02                                 | -0.249               | 3.93                         | 29.71                         | 0.1325 | 7.184  | 0.057                             | 7.108   | 7.143           | 7.172  | 7.204           | 7.445                   |
| NLRP2  | 3nv4BfhO9S6RXWhHSs | rs1036231  | 8.9                          | 8.49                                  | -0.166               | 3                            | -14.66                        | 0.295  | 8.066  | 0.55                              | 7.098   | 7.675           | 8.045  | 8.437           | 9.516                   |
| NLRP2  | 3nv4BfhO9S6RXWhHSs | rs1654496  | 9.32                         | 8.90                                  | -0.173               | 4.18                         | -10.67                        | 0.3175 | 8.066  | 0.55                              | 7.098   | 7.675           | 8.045  | 8.437           | 9.516                   |
| NLRP2  | 3nv4BfhO9S6RXWhHSs | rs1671133  | 7.41                         | 7.08                                  | 0.138                | 3.41                         | -5.46                         | 0.4525 | 8.066  | 0.55                              | 7.098   | 7.675           | 8.045  | 8.437           | 9.516                   |
| NLRP2  | 3nv4BfhO9S6RXWhHSs | rs1043673  | 7.66                         | 7.31                                  | -0.141               | 2.94                         | -0.27                         | 0.4275 | 8.066  | 0.55                              | 7.098   | 7.675           | 8.045  | 8.437           | 9.516                   |
| NLRP2  | 3nv4BfhO9S6RXWhHSs | rs10415310 | 8.11                         | 7.75                                  | 0.151                | 4.25                         | 3.47                          | 0.3375 | 8.066  | 0.55                              | 7.098   | 7.675           | 8.045  | 8.437           | 9.516                   |
| NLRP2  | 3nv4BfhO9S6RXWhHSs | rs1654410  | 6.94                         | 6.63                                  | 0.131                | 1.58                         | 12.31                         | 0.4523 | 8.066  | 0.55                              | 7.098   | 7.675           | 8.045  | 8.437           | 9.516                   |
| NLRP2  | 3nv4BfhO9S6RXWhHSs | rs10416380 | 7.67                         | 7.32                                  | 0.145                | 2.04                         | 12.4                          | 0.1725 | 8.066  | 0.55                              | 7.098   | 7.675           | 8.045  | 8.437           | 9.516                   |
| NLRP2  | 3nv4BfhO9S6RXWhHSs | rs11084381 | 7.18                         | 6.86                                  | -0.139               | 2                            | 22.91                         | 0.1818 | 8.066  | 0.55                              | 7.098   | 7.675           | 8.045  | 8.437           | 9.516                   |
| NLRP2  | 3nv4BfhO9S6RXWhHSs | rs1613662  | 8.64                         | 8.25                                  | -0.165               | 2.53                         | 24.09                         | 0.1683 | 8.066  | 0.55                              | 7.098   | 7.675           | 8.045  | 8.437           | 9.516                   |
| NLRP2  | 3nv4BfhO9S6RXWhHSs | rs1671196  | 7.18                         | 6.86                                  | 0.138                | 2.03                         | 27.04                         | 0.18   | 8.066  | 0.55                              | 7.098   | 7.675           | 8.045  | 8.437           | 9.516                   |
| NLRP2  | 3nv4BfhO9S6RXWhHSs | rs1671215  | 5.77                         | 5.52                                  | -0.106               | 2.07                         | 40.51                         | 0.315  | 8.066  | 0.55                              | 7.098   | 7.675           | 8.045  | 8.437           | 9.516                   |
| NLRP2  | 3nv4BfhO9S6RXWhHSs | rs1059211  | 8.19                         | 7.85                                  | -0.153               | 3.33                         | 47.23                         | 0.2487 | 8.066  | 0.55                              | 7.098   | 7.675           | 8.045  | 8.437           | 9.516                   |
| NLRP2  | 3nv4BfhO9S6RXWhHSs | rs6509916  | 5.39                         | 5.12                                  | 0.1                  | 2.55                         | 49.9                          | 0.45   | 8.066  | 0.55                              | 7.098   | 7.675           | 8.045  | 8.437           | 9.516                   |
| NMB    | fION52g115wKd6m4k  | rs11635597 | 4.56                         | 4.36                                  | -0.089               | 2.09                         | -32.66                        | 0.33   | 7.602  | 0.18                              | 7.234   | 7.463           | 7.58   | 7.731           | 8.117                   |
| NMB    | fION52g115wKd6m4k  | rs2271431  | 4.56                         | 4.36                                  | 0.089                | 1.43                         | -8.9                          | 0.33   | 7.602  | 0.18                              | 7.234   | 7.463           | 7.58   | 7.731           | 8.117                   |
| NMB    | fION52g115wKd6m4k  | rs11638290 | 4.11                         | 3.94                                  | -0.08                | 1.64                         | 25.83                         | 0.3325 | 7.602  | 0.18                              | 7.234   | 7.463           | 7.58   | 7.731           | 8.117                   |
| NME1   | uqUJrmHtx.Kjbf0KY  | rs10514981 | 3.63                         | 3.47                                  | -0.07                | 1.37                         | -11.47                        | 0.206  | 7.203  | 0.073                             | 7.108   | 7.151           | 7.183  | 7.234           | 7.526                   |
| NME1   | Koi5lgojafuv0V4oHo | rs16949649 | 12.04                        | 11.48                                 | -0.23                | 5.83                         | -0.61                         | 0.3725 | 10.261 | 0.3                               | 8.645   | 10.091          | 10.274 | 10.424          | 10.946                  |
| NME1   | uqUJrmHtx.Kjbf0KY  | rs16949649 | 6.65                         | 6.36                                  | -0.13                | 2.59                         | -0.61                         | 0.3725 | 7.203  | 0.073                             | 7.108   | 7.151           | 7.183  | 7.234           | 7.526                   |
| NME1   | Koi5lgojafuv0V4oHo | rs3760469  | 7.54                         | 7.20                                  | -0.149               | 4.91                         | -0.37                         | 0.47   | 10.261 | 0.3                               | 8.645   | 10.091          | 10.274 | 10.424          | 10.946                  |
| NME1   | uqUJrmHtx.Kjbf0KY  | rs3760469  | 5.48                         | 5.24                                  | -0.109               | 1.84                         | -0.37                         | 0.47   | 7.203  | 0.073                             | 7.108   | 7.151           | 7.183  | 7.234           | 7.526                   |
| NME1   | Koi5lgojafuv0V4oHo | rs2041296  | 5.22                         | 4.99                                  | 0.1                  | 2.84                         | -1.89                         | 0.1825 | 10.261 | 0.3                               | 8.645   | 10.091          | 10.274 | 10.424          | 10.946                  |
| NME1   | uqUJrmHtx.Kjbf0KY  | rs2318785  | 4.24                         | 4.06                                  | 0.083                | 0.93                         | 0.07                          | 0.49   | 7.203  | 0.073                             | 7.108   | 7.151           | 7.183  | 7.234           | 7.526                   |
| NME1   | Koi5lgojafuv0V4oHo | rs2318785  | 4.16                         | 3.98                                  | 0.08                 | 2.1                          | 0.07                          | 0.49   | 10.261 | 0.3                               | 8.645   | 10.091          | 10.274 | 10.424          | 10.946                  |
| NME2   | Bl66ml00Jn2JlKj1I0 | rs16949649 | 4.27                         | 4.09                                  | 0.078                | 1.36                         | -13.33                        | 0.3725 | 11.706 | 0.516                             | 7.474   | 11.509          | 11.774 | 11.991          | 12.537                  |
| NME2   | Bl66ml00Jn2JlKj1I0 | rs3760469  | 3.35                         | 3.21                                  | 0.061                | 1.18                         | -13.09                        | 0.47   | 11.706 | 0.516                             | 7.474   | 11.509          | 11.774 | 11.991          | 12.537                  |
| NME2   | Bl66ml00Jn2JlKj1I0 | rs2041296  | 3.32                         | 3.18                                  | -0.059               | 0.86                         | -6.08                         | 0.1825 | 11.706 | 0.516                             | 7.474   | 11.509          | 11.774 | 11.991          | 12.537                  |
| NME4   | fr7ISROrrEcPOH1VJ0 | rs3904991  | 11.54                        | 11.01                                 | -0.233               | 5.43                         | -4.39                         | 0.4495 | 9.354  | 0.35                              | 8.258   | 9.11            | 9.371  | 9.608           | 10.125                  |
| NME4   | fr7ISROrrEcPOH1VJ0 | rs1698231  | 3.6                          | 3.44                                  | -0.072               | 3.54                         | 16.83                         | 0.4475 | 9.354  | 0.35                              | 8.258   | 9.11            | 9.371  | 9.608           | 10.125                  |
| NME4   | fr7ISROrrEcPOH1VJ0 | rs1204509  | 4.6                          | 4.40                                  | -0.093               | 4.14                         | 29.34                         | 0.4472 | 9.354  | 0.35                              | 8.258   | 9.11            | 9.371  | 9.608           | 10.125                  |
| NME4   | fr7ISROrrEcPOH1VJ0 | rs1698232  | 6.96                         | 6.65                                  | -0.139               | 4.89                         | 34.8                          | 0.4375 | 9.354  | 0.35                              | 8.258   | 9.11            | 9.371  | 9.608           | 10.125                  |
| NME4   | fr7ISROrrEcPOH1VJ0 | rs12926123 | 7.09                         | 6.77                                  | 0.142                | 4.9                          | 36.97                         | 0.4347 | 9.354  | 0.35                              | 8.258   | 9.11            | 9.371  | 9.608           | 10.125                  |
| NME4   | fr7ISROrrEcPOH1VJ0 | rs7196963  | 3.85                         | 3.68                                  | -0.074               | 4.12                         | 44.78                         | 0.37   | 9.354  | 0.35                              | 8.258   | 9.11            | 9.371  | 9.608           | 10.125                  |
| NME7   | cUg570ex43llo6XPlo | rs3753292  | 3.32                         | 3.18                                  | -0.063               | 1.27                         | -10.3                         | 0.4725 | 8.49   | 0.201                             | 7.946   | 8.35            | 8.479  | 8.64            | 9.018                   |
| NME7   | cUg570ex43llo6XPlo | rs1892094  | 4.12                         | 3.94                                  | 0.081                | 1.52                         | -7.31                         | 0.4925 | 8.49   | 0.201                             | 7.946   | 8.35            | 8.479  | 8.64            | 9.018                   |
| NME7   | cUg570ex43llo6XPlo | rs1200160  | 4.43                         | 4.24                                  | 0.088                | 1.39                         | 1.43                          | 0.495  | 8.49   | 0.201                             | 7.946   | 8.35            | 8.479  | 8.64            | 9.018                   |
| NME7   | cUg570ex43llo6XPlo | rs17349439 | 3.67                         | 3.52                                  | -0.071               | 0.69                         | 44.67                         | 0.3175 | 8.49   | 0.201                             | 7.946   | 8.35            | 8.479  | 8.64            | 9.018                   |
| NME7   | cUg570ex43llo6XPlo | rs1200082  | 4.48                         | 4.28                                  | 0.09                 | 1.55                         | 58.96                         | 0.165  | 8.49   | 0.201                             | 7.946   | 8.35            | 8.479  | 8.64            | 9.018                   |
| NME7   | cUg570ex43llo6XPlo | rs1208370  | 7.14                         | 6.82                                  | 0.145                | 2.04                         | 68.26                         | 0.3763 | 8.49   | 0.201                             | 7.946   | 8.35            | 8.479  | 8.64            | 9.018                   |
| NME7   | cUg570ex43llo6XPlo | rs1208377  | 7.31                         | 6.98                                  | -0.148               | 2.2                          | 90.09                         | 0.3744 | 8.49   | 0.201                             | 7.946   | 8.35            | 8.479  | 8.64            | 9.018                   |
| NME7   | cUg570ex43llo6XPlo | rs6703463  | 3.92                         | 3.75                                  | 0.079                | 1.17                         | 97.66                         | 0.3883 | 8.49   | 0.201                             | 7.946   | 8.35            | 8.479  | 8.64            | 9.018                   |
| NME7   | cUg570ex43llo6XPlo | rs2157597  | 3.64                         | 3.48                                  | 0.071                | 0.76                         | 99.8                          | 0.3191 | 8.49   | 0.201                             | 7.946   | 8.35            | 8.479  | 8.64            | 9.018                   |
| NME7   | cUg570ex43llo6XPlo | rs12121994 | 3.56                         | 3.41                                  | 0.069                | 0.75                         | -78.88                        | 0.3375 | 8.49   | 0.201                             | 7.946   | 8.35            | 8.479  | 8.64            | 9.018                   |

| Symbol | Lumi nuID          | SNP        | Population-based association p-value (-log10) | Population-based association p-value (-log10), GC add | % Variance Explained | Family-based association p-value (-log10) | Distance from transcript (kb) | MAF    | Mean   | Transcript abundance (log2 scale) |         |                 |        |                 | SNP mapping under probe |         |
|--------|--------------------|------------|-----------------------------------------------|-------------------------------------------------------|----------------------|-------------------------------------------|-------------------------------|--------|--------|-----------------------------------|---------|-----------------|--------|-----------------|-------------------------|---------|
|        |                    |            |                                               |                                                       |                      |                                           |                               |        |        | Standard Deviation                | Minimum | 25th percentile | Median | 75th percentile |                         | Maximum |
| NME7   | cUg570ex43llo6XPlo | rs12118611 | 3.71                                          | 3.55                                                  | 0.072                | 0.69                                      | -61.56                        | 0.32   | 8.49   | 0.201                             | 7.946   | 8.35            | 8.479  | 8.64            | 9.018                   |         |
| NME7   | cUg570ex43llo6XPlo | rs10753786 | 7.5                                           | 7.16                                                  | -0.152               | 2.09                                      | -48.42                        | 0.39   | 8.49   | 0.201                             | 7.946   | 8.35            | 8.479  | 8.64            | 9.018                   |         |
| NME7   | cUg570ex43llo6XPlo | rs10800431 | 6.79                                          | 6.48                                                  | -0.136               | 1.44                                      | -45.98                        | 0.4475 | 8.49   | 0.201                             | 7.946   | 8.35            | 8.479  | 8.64            | 9.018                   |         |
| NME7   | cUg570ex43llo6XPlo | rs7538259  | 6.79                                          | 6.48                                                  | -0.136               | 1.44                                      | -43.47                        | 0.4475 | 8.49   | 0.201                             | 7.946   | 8.35            | 8.479  | 8.64            | 9.018                   |         |
| NME7   | cUg570ex43llo6XPlo | rs10919144 | 6.79                                          | 6.48                                                  | 0.136                | 1.57                                      | -28.76                        | 0.4475 | 8.49   | 0.201                             | 7.946   | 8.35            | 8.479  | 8.64            | 9.018                   |         |
| NME7   | cUg570ex43llo6XPlo | rs2176473  | 6.32                                          | 6.04                                                  | 0.128                | 1.23                                      | -5.38                         | 0.3425 | 8.49   | 0.201                             | 7.946   | 8.35            | 8.479  | 8.64            | 9.018                   |         |
| NME7   | cUg570ex43llo6XPlo | rs6677410  | 4.44                                          | 4.25                                                  | -0.09                | 0.16                                      | 16.11                         | 0.3838 | 8.49   | 0.201                             | 7.946   | 8.35            | 8.479  | 8.64            | 9.018                   |         |
| NMNAT3 | i5GeDkveJOkmlXirSM | rs11720063 | 3.53                                          | 3.38                                                  | -0.069               | 1.9                                       | 14.19                         | 0.3075 | 7.275  | 0.12                              | 7.11    | 7.181           | 7.259  | 7.341           | 7.886                   |         |
| NOD2   | 0epSD9AaXRyn3r45e4 | rs9302752  | 4.72                                          | 4.52                                                  | -0.094               | 2.71                                      | -11.95                        | 0.28   | 8.637  | 0.509                             | 7.719   | 8.297           | 8.601  | 8.879           | 10.598                  |         |
| NOD2   | 0epSD9AaXRyn3r45e4 | rs7194886  | 4.82                                          | 4.61                                                  | 0.092                | 2.8                                       | -5.86                         | 0.4125 | 8.637  | 0.509                             | 7.719   | 8.297           | 8.601  | 8.879           | 10.598                  |         |
| NOD2   | 0epSD9AaXRyn3r45e4 | rs2111234  | 3.48                                          | 3.33                                                  | -0.066               | 2.74                                      | 2.98                          | 0.3275 | 8.637  | 0.509                             | 7.719   | 8.297           | 8.601  | 8.879           | 10.598                  |         |
| NOD2   | 0epSD9AaXRyn3r45e4 | rs8057341  | 3.59                                          | 3.44                                                  | 0.068                | 3.05                                      | 6.93                          | 0.3275 | 8.637  | 0.509                             | 7.719   | 8.297           | 8.601  | 8.879           | 10.598                  |         |
| NOD2   | 0epSD9AaXRyn3r45e4 | rs11647841 | 3.37                                          | 3.23                                                  | -0.062               | 2.6                                       | 12.28                         | 0.3852 | 8.637  | 0.509                             | 7.719   | 8.297           | 8.601  | 8.879           | 10.598                  |         |
| NOD2   | 0epSD9AaXRyn3r45e4 | rs10521209 | 3.36                                          | 3.22                                                  | -0.061               | 2.58                                      | -11.28                        | 0.4075 | 8.637  | 0.509                             | 7.719   | 8.297           | 8.601  | 8.879           | 10.598                  |         |
| NOLA3  | odbBQHfaHuJXjI_Uk  | rs6495662  | 5.46                                          | 5.22                                                  | 0.11                 | 2.35                                      | -3.34                         | 0.1875 | 11.902 | 0.287                             | 10.73   | 11.732          | 11.95  | 12.093          | 12.632                  |         |
| NOLA3  | odbBQHfaHuJXjI_Uk  | rs8031404  | 3.48                                          | 3.33                                                  | -0.067               | 2.16                                      | 2.34                          | 0.1125 | 11.902 | 0.287                             | 10.73   | 11.732          | 11.95  | 12.093          | 12.632                  |         |
| NOLA3  | odbBQHfaHuJXjI_Uk  | rs12595504 | 3.48                                          | 3.33                                                  | 0.067                | 2.16                                      | 2.84                          | 0.1125 | 11.902 | 0.287                             | 10.73   | 11.732          | 11.95  | 12.093          | 12.632                  |         |
| NOM1   | cq5pxwjgABzRhLpFF4 | rs2969114  | 5.72                                          | 5.47                                                  | -0.11                | 0.92                                      | -13.75                        | 0.24   | 7.241  | 0.106                             | 7.108   | 7.153           | 7.217  | 7.299           | 7.568                   | Yes     |
| NOM1   | cq5pxwjgABzRhLpFF4 | rs12670999 | 7.66                                          | 7.32                                                  | 0.15                 | 2.08                                      | 5.62                          | 0.215  | 7.241  | 0.106                             | 7.108   | 7.153           | 7.217  | 7.299           | 7.568                   | Yes     |
| NOM1   | cq5pxwjgABzRhLpFF4 | rs887614   | 6.32                                          | 6.04                                                  | 0.126                | 0.9                                       | 8.28                          | 0.435  | 7.241  | 0.106                             | 7.108   | 7.153           | 7.217  | 7.299           | 7.568                   | Yes     |
| NOM1   | cq5pxwjgABzRhLpFF4 | rs887611   | 6.32                                          | 6.04                                                  | 0.126                | 0.9                                       | 8.81                          | 0.435  | 7.241  | 0.106                             | 7.108   | 7.153           | 7.217  | 7.299           | 7.568                   | Yes     |
| NOM1   | cq5pxwjgABzRhLpFF4 | rs2024265  | 15.14                                         | 14.44                                                 | 0.292                | 4.07                                      | -8.25                         | 0.245  | 7.241  | 0.106                             | 7.108   | 7.153           | 7.217  | 7.299           | 7.568                   | Yes     |
| NOM1   | cq5pxwjgABzRhLpFF4 | rs2302445  | 6.08                                          | 5.81                                                  | 0.124                | 1.25                                      | -4.06                         | 0.4162 | 7.241  | 0.106                             | 7.108   | 7.153           | 7.217  | 7.299           | 7.568                   | Yes     |
| NOM1   | cq5pxwjgABzRhLpFF4 | rs12919    | 6.82                                          | 6.52                                                  | 0.138                | 1.26                                      | -3.63                         | 0.4225 | 7.241  | 0.106                             | 7.108   | 7.153           | 7.217  | 7.299           | 7.568                   | Yes     |
| NOM1   | cq5pxwjgABzRhLpFF4 | rs10227139 | 5.97                                          | 5.71                                                  | 0.122                | 0.77                                      | 4.56                          | 0.4086 | 7.241  | 0.106                             | 7.108   | 7.153           | 7.217  | 7.299           | 7.568                   | Yes     |
| NOM1   | cq5pxwjgABzRhLpFF4 | rs6963005  | 3.6                                           | 3.44                                                  | -0.066               | 2.17                                      | 6.67                          | 0.135  | 7.241  | 0.106                             | 7.108   | 7.153           | 7.217  | 7.299           | 7.568                   | Yes     |
| NOVA2  | ospWHkV1X3rLTKSj4s | rs2015728  | 4.73                                          | 4.53                                                  | 0.1                  | 0.58                                      | -23.91                        | 0.0859 | 7.14   | 0.029                             | 7.103   | 7.124           | 7.133  | 7.149           | 7.312                   |         |
| NPDC1  | ZvyFVAeik6lFsiZKA  | rs12337910 | 7                                             | 6.68                                                  | -0.134               | 2.5                                       | -4.49                         | 0.095  | 9.082  | 0.505                             | 7.893   | 8.73            | 9.08   | 9.447           | 10.327                  |         |
| NPEPL1 | ISVJXuAjonh_eSgF48 | rs6128397  | 4.5                                           | 4.30                                                  | 0.084                | 0.12                                      | -14.73                        | 0.3    | 10.573 | 0.386                             | 9.583   | 10.305          | 10.588 | 10.846          | 11.596                  |         |
| NPEPL1 | ISVJXuAjonh_eSgF48 | rs8978     | 5                                             | 4.78                                                  | 0.095                | 0.4                                       | -0.05                         | 0.368  | 10.573 | 0.386                             | 9.583   | 10.305          | 10.588 | 10.846          | 11.596                  |         |
| NPEPL1 | ISVJXuAjonh_eSgF48 | rs2426778  | 3.59                                          | 3.44                                                  | -0.066               | 0.51                                      | 2.58                          | 0.475  | 10.573 | 0.386                             | 9.583   | 10.305          | 10.588 | 10.846          | 11.596                  |         |
| NPEPL1 | ISVJXuAjonh_eSgF48 | rs6070563  | 3.33                                          | 3.19                                                  | 0.058                | 0.51                                      | 4.23                          | 0.285  | 10.573 | 0.386                             | 9.583   | 10.305          | 10.588 | 10.846          | 11.596                  |         |
| NPHP1  | 9th0V_Sl_TdlwF7h4  | rs10496435 | 3.36                                          | 3.22                                                  | -0.065               | 2.19                                      | -33.42                        | 0.365  | 7.113  | 0.011                             | 7.094   | 7.105           | 7.111  | 7.117           | 7.168                   |         |
| NPHP3  | xnH8l_U9d_f9JLleIQ | rs12636883 | 5.42                                          | 5.18                                                  | 0.105                | 0.78                                      | -11.75                        | 0.1558 | 9.062  | 0.379                             | 7.997   | 8.765           | 9.086  | 9.329           | 9.934                   |         |
| NPHP3  | xnH8l_U9d_f9JLleIQ | rs11718115 | 5.29                                          | 5.05                                                  | -0.101               | 0.94                                      | -5.45                         | 0.31   | 9.062  | 0.379                             | 7.997   | 8.765           | 9.086  | 9.329           | 9.934                   |         |
| NPHP3  | xnH8l_U9d_f9JLleIQ | rs2369832  | 6.49                                          | 6.20                                                  | -0.126               | 1.37                                      | -3.89                         | 0.185  | 9.062  | 0.379                             | 7.997   | 8.765           | 9.086  | 9.329           | 9.934                   |         |
| NPHP3  | xnH8l_U9d_f9JLleIQ | rs3860503  | 5.59                                          | 5.34                                                  | 0.107                | 0.71                                      | -2.98                         | 0.205  | 9.062  | 0.379                             | 7.997   | 8.765           | 9.086  | 9.329           | 9.934                   |         |
| NPHP3  | xnH8l_U9d_f9JLleIQ | rs747328   | 3.96                                          | 3.79                                                  | 0.076                | 0.6                                       | 2.38                          | 0.1875 | 9.062  | 0.379                             | 7.997   | 8.765           | 9.086  | 9.329           | 9.934                   |         |
| NPHP3  | xnH8l_U9d_f9JLleIQ | rs10935030 | 4.74                                          | 4.54                                                  | 0.094                | 0.73                                      | 5.83                          | 0.1558 | 9.062  | 0.379                             | 7.997   | 8.765           | 9.086  | 9.329           | 9.934                   |         |
| NPTXR  | TUVJ6EaiH4ISX3h5PQ | rs8141420  | 3.32                                          | 3.18                                                  | 0.063                | 1.3                                       | 17.38                         | 0.2425 | 7.327  | 0.123                             | 7.16    | 7.239           | 7.293  | 7.395           | 7.743                   |         |
| NPY2R  | KRR4EgP3UqJRKd19Nk | rs17304749 | 3.59                                          | 3.44                                                  | -0.069               | 0.48                                      | -15.91                        | 0.055  | 7.108  | 0.01                              | 7.093   | 7.102           | 7.105  | 7.112           | 7.164                   |         |
| NQO2   | EaikaW17EYISi0iPc  | rs3799200  | 3.51                                          | 3.36                                                  | 0.064                | 0.49                                      | -42.14                        | 0.1834 | 8.388  | 0.345                             | 7.668   | 8.132           | 8.352  | 8.561           | 9.754                   |         |
| NQO2   | EaikaW17EYISi0iPc  | rs7743193  | 4.12                                          | 3.94                                                  | -0.077               | 0.68                                      | -29.66                        | 0.3375 | 8.388  | 0.345                             | 7.668   | 8.132           | 8.352  | 8.561           | 9.754                   |         |
| NQO2   | EaikaW17EYISi0iPc  | rs2326106  | 6.37                                          | 6.09                                                  | -0.122               | 0.91                                      | -10.65                        | 0.201  | 8.388  | 0.345                             | 7.668   | 8.132           | 8.352  | 8.561           | 9.754                   |         |
| NQO2   | EaikaW17EYISi0iPc  | rs1054132  | 7.47                                          | 7.13                                                  | 0.152                | 1.24                                      | -9.34                         | 0.4275 | 8.388  | 0.345                             | 7.668   | 8.132           | 8.352  | 8.561           | 9.754                   |         |
| NQO2   | EaikaW17EYISi0iPc  | rs2071002  | 8.52                                          | 8.14                                                  | -0.165               | 1.85                                      | 0.07                          | 0.2975 | 8.388  | 0.345                             | 7.668   | 8.132           | 8.352  | 8.561           | 9.754                   |         |
| NQO2   | EaikaW17EYISi0iPc  | rs4149352  | 8.01                                          | 7.65                                                  | 0.165                | 1.9                                       | 2.01                          | 0.255  | 8.388  | 0.345                             | 7.668   | 8.132           | 8.352  | 8.561           | 9.754                   |         |
| NQO2   | EaikaW17EYISi0iPc  | rs1143684  | 10.6                                          | 10.11                                                 | -0.215               | 2.93                                      | -9.6                          | 0.235  | 8.388  | 0.345                             | 7.668   | 8.132           | 8.352  | 8.561           | 9.754                   |         |
| NQO2   | EaikaW17EYISi0iPc  | rs9378352  | 13.83                                         | 13.19                                                 | -0.272               | 4.09                                      | -8.85                         | 0.39   | 8.388  | 0.345                             | 7.668   | 8.132           | 8.352  | 8.561           | 9.754                   |         |
| NQO2   | EaikaW17EYISi0iPc  | rs1885298  | 11.2                                          | 10.69                                                 | -0.219               | 1.87                                      | -2.41                         | 0.1875 | 8.388  | 0.345                             | 7.668   | 8.132           | 8.352  | 8.561           | 9.754                   |         |
| NQO2   | EaikaW17EYISi0iPc  | rs10223369 | 14.27                                         | 13.60                                                 | 0.276                | 4.76                                      | -1.82                         | 0.3375 | 8.388  | 0.345                             | 7.668   | 8.132           | 8.352  | 8.561           | 9.754                   |         |
| NQO2   | EaikaW17EYISi0iPc  | rs4149370  | 12.93                                         | 12.33                                                 | 0.249                | 3.51                                      | -0.34                         | 0.285  | 8.388  | 0.345                             | 7.668   | 8.132           | 8.352  | 8.561           | 9.754                   |         |
| NQO2   | EaikaW17EYISi0iPc  | rs1885300  | 12.79                                         | 12.20                                                 | 0.242                | 2.45                                      | 9.13                          | 0.2275 | 8.388  | 0.345                             | 7.668   | 8.132           | 8.352  | 8.561           | 9.754                   |         |
| NQO2   | EaikaW17EYISi0iPc  | rs1040521  | 7.35                                          | 7.02                                                  | -0.144               | 2.71                                      | 19.61                         | 0.3889 | 8.388  | 0.345                             | 7.668   | 8.132           | 8.352  | 8.561           | 9.754                   |         |
| NQO2   | EaikaW17EYISi0iPc  | rs7774283  | 7.7                                           | 7.36                                                  | -0.15                | 2.77                                      | 21.21                         | 0.385  | 8.388  | 0.345                             | 7.668   | 8.132           | 8.352  | 8.561           | 9.754                   |         |
| NQO2   | EaikaW17EYISi0iPc  | rs7761969  | 7.94                                          | 7.58                                                  | -0.155               | 4.25                                      | 29.99                         | 0.3775 | 8.388  | 0.345                             | 7.668   | 8.132           | 8.352  | 8.561           | 9.754                   |         |
| NQO2   | EaikaW17EYISi0iPc  | rs7775816  | 5.83                                          | 5.57                                                  | -0.117               | 3.74                                      | 37.42                         | 0.1784 | 8.388  | 0.345                             | 7.668   | 8.132           | 8.352  | 8.561           | 9.754                   |         |
| NQO2   | EaikaW17EYISi0iPc  | rs12200314 | 7                                             | 6.69                                                  | 0.137                | 4.34                                      | 38.7                          | 0.4025 | 8.388  | 0.345                             | 7.668   | 8.132           | 8.352  | 8.561           | 9.754                   |         |
| NR1D2  | ZfmgDID467VQ5VF0SI | rs11718625 | 3.56                                          | 3.41                                                  | 0.066                | 1.82                                      | -49.84                        | 0.1625 | 8.389  | 0.474                             | 7.286   | 8.065           | 8.369  | 8.654           | 9.932                   |         |
| NR1D2  | ZfmgDID467VQ5VF0SI | rs9876561  | 5.48                                          | 5.24                                                  | 0.107                | 3.66                                      | -49.02                        | 0.2175 | 8.389  | 0.474                             | 7.286   | 8.065           | 8.369  | 8.654           | 9.932                   |         |
| NR1D2  | ZfmgDID467VQ5VF0SI | rs2001209  | 9.18                                          | 8.76                                                  | -0.182               | 4.9                                       | -24.16                        | 0.2875 | 8.389  | 0.474                             | 7.286   | 8.065           | 8.369  | 8.654           | 9.932                   |         |
| NR1D2  | ZfmgDID467VQ5VF0SI | rs13325754 | 6.66                                          | 6.36                                                  | -0.132               | 3.6                                       | -4.48                         | 0.22   | 8.389  | 0.474                             | 7.286   | 8.065           | 8.369  | 8.654           | 9.932                   |         |

| Symbol | Lumi nuID          | SNP        | Population-based association |                  | % Variance Explained | Family-based association |                               | Transcript abundance (log2 scale) |        |                    |         |                 |        |                 | SNP mapping under probe |
|--------|--------------------|------------|------------------------------|------------------|----------------------|--------------------------|-------------------------------|-----------------------------------|--------|--------------------|---------|-----------------|--------|-----------------|-------------------------|
|        |                    |            | p-value (-log10)             | p-value (-log10) |                      | p-value (-log10)         | Distance from transcript (kb) | MAF                               | Mean   | Standard Deviation | Minimum | 25th percentile | Median | 75th percentile |                         |
| NR1D2  | ZfmgDiD467VQ5VF0SI | rs4131864  | 4.58                         | 4.38             | 0.087                | 2.61                     | -1                            | 0.2575                            | 8.389  | 0.474              | 7.286   | 8.065           | 8.369  | 8.654           | 9.932                   |
| NR1D2  | ZfmgDiD467VQ5VF0SI | rs3935253  | 3.44                         | 3.30             | -0.067               | 1.35                     | 12.95                         | 0.065                             | 8.389  | 0.474              | 7.286   | 8.065           | 8.369  | 8.654           | 9.932                   |
| NR1D2  | ZfmgDiD467VQ5VF0SI | rs1567580  | 3.44                         | 3.30             | 0.067                | 1.45                     | 15.54                         | 0.065                             | 8.389  | 0.474              | 7.286   | 8.065           | 8.369  | 8.654           | 9.932                   |
| NR1D2  | ZfmgDiD467VQ5VF0SI | rs4568061  | 4.39                         | 4.20             | 0.084                | 2.67                     | 28.28                         | 0.315                             | 8.389  | 0.474              | 7.286   | 8.065           | 8.369  | 8.654           | 9.932                   |
| NR1D2  | ZfmgDiD467VQ5VF0SI | rs4356765  | 3.93                         | 3.76             | -0.075               | 2.44                     | 30.79                         | 0.295                             | 8.389  | 0.474              | 7.286   | 8.065           | 8.369  | 8.654           | 9.932                   |
| NR1D2  | ZfmgDiD467VQ5VF0SI | rs951015   | 4.19                         | 4.01             | 0.08                 | 2.92                     | 32.55                         | 0.3116                            | 8.389  | 0.474              | 7.286   | 8.065           | 8.369  | 8.654           | 9.932                   |
| NR2F6  | iVck4H7qOuq_n1ek44 | rs2288540  | 4.32                         | 4.13             | -0.088               | 0.83                     | -5.35                         | 0.1111                            | 7.944  | 0.385              | 7.263   | 7.63            | 7.915  | 8.181           | 9.065                   |
| NR2F6  | iVck4H7qOuq_n1ek44 | rs744067   | 3.4                          | 3.26             | -0.063               | 1.2                      | -2.75                         | 0.1                               | 7.944  | 0.385              | 7.263   | 7.63            | 7.915  | 8.181           | 9.065                   |
| NR2F6  | iVck4H7qOuq_n1ek44 | rs7258100  | 5.53                         | 5.28             | 0.114                | 1.36                     | -2.29                         | 0.11                              | 7.944  | 0.385              | 7.263   | 7.63            | 7.915  | 8.181           | 9.065                   |
| NR2F6  | iVck4H7qOuq_n1ek44 | rs2288539  | 6.61                         | 6.32             | -0.138               | 1.67                     | -4.62                         | 0.1156                            | 7.944  | 0.385              | 7.263   | 7.63            | 7.915  | 8.181           | 9.065                   |
| NR2F6  | iVck4H7qOuq_n1ek44 | rs9676419  | 5.31                         | 5.07             | -0.106               | 1.57                     | 11.28                         | 0.24                              | 7.944  | 0.385              | 7.263   | 7.63            | 7.915  | 8.181           | 9.065                   |
| NR6A1  | KJSIhQjop7okk.Vvl0 | rs10818986 | 3.97                         | 3.80             | 0.076                | 0.26                     | -62.68                        | 0.0875                            | 7.121  | 0.018              | 7.098   | 7.111           | 7.119  | 7.127           | 7.291                   |
| NRBP2  | EF3.vgq6T3nhRJHUE  | rs11778556 | 3.43                         | 3.43             | -0.068               | 1.92                     | 3.07                          | 0.2652                            | 9.357  | 0.378              | 8.191   | 9.066           | 9.35   | 9.636           | 10.905                  |
| NRG1   | rcTUUeoQIN_wDualKI | rs17646307 | 6.33                         | 6.05             | -0.119               | 1.37                     | -7.73                         | 0.0675                            | 7.342  | 0.248              | 7.115   | 7.182           | 7.235  | 7.404           | 8.427                   |
| NRG1   | rcTUUeoQIN_wDualKI | rs10503920 | 4.57                         | 4.37             | 0.085                | 1.02                     | 22.84                         | 0.31                              | 7.342  | 0.248              | 7.115   | 7.182           | 7.235  | 7.404           | 8.427                   |
| NRG1   | rcTUUeoQIN_wDualKI | rs2466066  | 3.87                         | 3.71             | -0.073               | 0.31                     | 32.56                         | 0.273                             | 7.342  | 0.248              | 7.115   | 7.182           | 7.235  | 7.404           | 8.427                   |
| NRG1   | rcTUUeoQIN_wDualKI | rs10954859 | 3.34                         | 3.20             | -0.06                | 0.9                      | 36.5                          | 0.2613                            | 7.342  | 0.248              | 7.115   | 7.182           | 7.235  | 7.404           | 8.427                   |
| NRXN3  | HaAa1Q7JKQs4WVXg4  | rs8007529  | 3.94                         | 3.77             | 0.076                | 0.98                     | 26.84                         | 0.065                             | 7.114  | 0.013              | 7.098   | 7.107           | 7.111  | 7.118           | 7.246                   |
| NSUN2  | EkXS67iPBOS6rwekU  | rs10223157 | 3.33                         | 3.19             | -0.063               | 1.53                     | -6.64                         | 0.2975                            | 11.353 | 0.329              | 8.565   | 11.195          | 11.365 | 11.504          | 12.693                  |
| NSUN2  | EkXS67iPBOS6rwekU  | rs7700639  | 3.52                         | 3.37             | 0.068                | 1.36                     | 7.46                          | 0.4689                            | 11.353 | 0.329              | 8.565   | 11.195          | 11.365 | 11.504          | 12.693                  |
| NSUN2  | EkXS67iPBOS6rwekU  | rs720846   | 5.69                         | 5.44             | 0.111                | 3.99                     | 8.56                          | 0.2975                            | 11.353 | 0.329              | 8.565   | 11.195          | 11.365 | 11.504          | 12.693                  |
| NSUN2  | EkXS67iPBOS6rwekU  | rs1366297  | 5.36                         | 5.13             | 0.104                | 3.63                     | 8.8                           | 0.3125                            | 11.353 | 0.329              | 8.565   | 11.195          | 11.365 | 11.504          | 12.693                  |
| NSUN2  | EkXS67iPBOS6rwekU  | rs6882580  | 3.33                         | 3.19             | -0.063               | 2.66                     | 9.67                          | 0.3275                            | 11.353 | 0.329              | 8.565   | 11.195          | 11.365 | 11.504          | 12.693                  |
| NSUN2  | EkXS67iPBOS6rwekU  | rs3822432  | 4.3                          | 4.13             | 0.086                | 3.39                     | 9.76                          | 0.4095                            | 11.353 | 0.329              | 8.565   | 11.195          | 11.365 | 11.504          | 12.693                  |
| NSUN2  | EkXS67iPBOS6rwekU  | rs3756429  | 5.36                         | 5.11             | -0.104               | 3.63                     | 13.79                         | 0.3125                            | 11.353 | 0.329              | 8.565   | 11.195          | 11.365 | 11.504          | 12.693                  |
| NSUN2  | EkXS67iPBOS6rwekU  | rs2303705  | 4.01                         | 3.84             | 0.076                | 1.93                     | -11.14                        | 0.4075                            | 11.353 | 0.329              | 8.565   | 11.195          | 11.365 | 11.504          | 12.693                  |
| NSUN2  | EkXS67iPBOS6rwekU  | rs10037161 | 4.01                         | 3.84             | 0.076                | 2.05                     | -8.86                         | 0.4075                            | 11.353 | 0.329              | 8.565   | 11.195          | 11.365 | 11.504          | 12.693                  |
| NSUN2  | EkXS67iPBOS6rwekU  | rs6874005  | 3.89                         | 3.72             | -0.073               | 2.04                     | -8.79                         | 0.405                             | 11.353 | 0.329              | 8.565   | 11.195          | 11.365 | 11.504          | 12.693                  |
| NSUN2  | EkXS67iPBOS6rwekU  | rs7706809  | 3.64                         | 3.48             | -0.072               | 1.38                     | 2.81                          | 0.4048                            | 11.353 | 0.329              | 8.565   | 11.195          | 11.365 | 11.504          | 12.693                  |
| NSUN2  | EkXS67iPBOS6rwekU  | rs4702374  | 3.68                         | 3.53             | -0.07                | 1.91                     | 5.27                          | 0.415                             | 11.353 | 0.329              | 8.565   | 11.195          | 11.365 | 11.504          | 12.693                  |
| NT5C3  | EHVCIHwg6SOi6UO_JE | rs4723233  | 4.02                         | 3.85             | 0.079                | 0.81                     | 9.46                          | 0.3275                            | 9.351  | 0.592              | 7.098   | 8.972           | 9.359  | 9.743           | 10.626                  |
| NT5C3  | EHVCIHwg6SOi6UO_JE | rs7793793  | 4.79                         | 4.59             | -0.094               | 0.86                     | -10.35                        | 0.295                             | 9.351  | 0.592              | 7.098   | 8.972           | 9.359  | 9.743           | 10.626                  |
| NT5C3  | EHVCIHwg6SOi6UO_JE | rs2049758  | 4.79                         | 4.59             | -0.094               | 0.86                     | -5.83                         | 0.295                             | 9.351  | 0.592              | 7.098   | 8.972           | 9.359  | 9.743           | 10.626                  |
| NT5C3  | EHVCIHwg6SOi6UO_JE | rs4723242  | 4.02                         | 3.85             | -0.079               | 0.81                     | 14.04                         | 0.3275                            | 9.351  | 0.592              | 7.098   | 8.972           | 9.359  | 9.743           | 10.626                  |
| NT5C3  | EHVCIHwg6SOi6UO_JE | rs10251079 | 4.02                         | 3.85             | -0.079               | 0.75                     | 14.46                         | 0.3275                            | 9.351  | 0.592              | 7.098   | 8.972           | 9.359  | 9.743           | 10.626                  |
| NT5C3  | EHVCIHwg6SOi6UO_JE | rs2392218  | 4.79                         | 4.59             | 0.094                | 0.86                     | 38.18                         | 0.295                             | 9.351  | 0.592              | 7.098   | 8.972           | 9.359  | 9.743           | 10.626                  |
| NT5C3  | EHVCIHwg6SOi6UO_JE | rs2022230  | 3.43                         | 3.29             | 0.065                | 0.61                     | 39.38                         | 0.3175                            | 9.351  | 0.592              | 7.098   | 8.972           | 9.359  | 9.743           | 10.626                  |
| NT5C3L | HW11.V4kX00Uin4KBU | rs1469863  | 4.13                         | 3.95             | 0.082                | 2.74                     | -14.37                        | 0.1                               | 8.718  | 0.379              | 7.957   | 8.462           | 8.719  | 9.022           | 9.834                   |
| NT5C3L | HW11.V4kX00Uin4KBU | rs11079016 | 7.32                         | 6.99             | -0.152               | 4.3                      | -5.43                         | 0.1775                            | 8.718  | 0.379              | 7.957   | 8.462           | 8.719  | 9.022           | 9.834                   |
| NT5C3L | HW11.V4kX00Uin4KBU | rs9907244  | 3.42                         | 3.28             | 0.066                | 3.12                     | -0.56                         | 0.4225                            | 8.718  | 0.379              | 7.957   | 8.462           | 8.719  | 9.022           | 9.834                   |
| NT5C3L | HW11.V4kX00Uin4KBU | rs1046403  | 12.28                        | 11.72            | 0.238                | 5.13                     | 2.36                          | 0.3                               | 8.718  | 0.379              | 7.957   | 8.462           | 8.719  | 9.022           | 9.834                   |
| NT5C3L | HW11.V4kX00Uin4KBU | rs4796712  | 3.49                         | 3.35             | 0.067                | 1.01                     | -5.32                         | 0.1225                            | 8.718  | 0.379              | 7.957   | 8.462           | 8.719  | 9.022           | 9.834                   |
| NT5C3L | HW11.V4kX00Uin4KBU | rs1319763  | 12.96                        | 12.36            | -0.252               | 5.14                     | -0.66                         | 0.304                             | 8.718  | 0.379              | 7.957   | 8.462           | 8.719  | 9.022           | 9.834                   |
| NT5C3L | HW11.V4kX00Uin4KBU | rs4796715  | 11.63                        | 11.09            | 0.226                | 4.77                     | 1.32                          | 0.2925                            | 8.718  | 0.379              | 7.957   | 8.462           | 8.719  | 9.022           | 9.834                   |
| NT5C3L | HW11.V4kX00Uin4KBU | rs9905601  | 4.26                         | 4.08             | -0.082               | 0.96                     | 22.76                         | 0.1583                            | 8.718  | 0.379              | 7.957   | 8.462           | 8.719  | 9.022           | 9.834                   |
| NT5C3L | HW11.V4kX00Uin4KBU | rs9303318  | 11.63                        | 11.09            | -0.226               | 4.51                     | 27.64                         | 0.2925                            | 8.718  | 0.379              | 7.957   | 8.462           | 8.719  | 9.022           | 9.834                   |
| NT5C3L | HW11.V4kX00Uin4KBU | rs4796729  | 11.2                         | 10.69            | -0.219               | 4.63                     | 49.23                         | 0.29                              | 8.718  | 0.379              | 7.957   | 8.462           | 8.719  | 9.022           | 9.834                   |
| NT5DC2 | 0uZ93hdxOI1dJ5edBw | rs1010554  | 3.47                         | 3.32             | -0.065               | 4.14                     | -15.48                        | 0.4548                            | 7.317  | 0.165              | 7.12    | 7.209           | 7.279  | 7.383           | 8.318                   |
| NT5DC2 | 0uZ93hdxOI1dJ5edBw | rs2251219  | 3.62                         | 3.47             | 0.066                | 2.46                     | 2.33                          | 0.4275                            | 7.317  | 0.165              | 7.12    | 7.209           | 7.279  | 7.383           | 8.318                   |
| NT5DC3 | QXkZT3UXSzf2qBUF4  | rs11111760 | 4.38                         | 4.19             | -0.084               | 2.54                     | -2.19                         | 0.25                              | 8.566  | 0.238              | 7.923   | 8.41            | 8.588  | 8.729           | 9.51                    |
| NT5DC3 | QXkZT3UXSzf2qBUF4  | rs17138889 | 4.31                         | 4.12             | -0.083               | 2.23                     | -1.71                         | 0.2487                            | 8.566  | 0.238              | 7.923   | 8.41            | 8.588  | 8.729           | 9.51                    |
| NT5DC3 | QXkZT3UXSzf2qBUF4  | rs10861099 | 3.69                         | 3.53             | -0.069               | 1.99                     | 9.49                          | 0.3625                            | 8.566  | 0.238              | 7.923   | 8.41            | 8.588  | 8.729           | 9.51                    |
| NT5DC3 | QXkZT3UXSzf2qBUF4  | rs12368209 | 7.44                         | 7.11             | -0.15                | 2.6                      | 14.78                         | 0.2236                            | 8.566  | 0.238              | 7.923   | 8.41            | 8.588  | 8.729           | 9.51                    |
| NT5DC3 | QXkZT3UXSzf2qBUF4  | rs11111790 | 6.47                         | 6.18             | 0.132                | 2.39                     | 26.7                          | 0.1734                            | 8.566  | 0.238              | 7.923   | 8.41            | 8.588  | 8.729           | 9.51                    |
| NT5DC3 | QXkZT3UXSzf2qBUF4  | rs10861116 | 8.35                         | 7.98             | -0.174               | 2.6                      | -8.75                         | 0.15                              | 8.566  | 0.238              | 7.923   | 8.41            | 8.588  | 8.729           | 9.51                    |
| NT5DC3 | QXkZT3UXSzf2qBUF4  | rs4964571  | 8.35                         | 7.98             | -0.174               | 2.6                      | -7.51                         | 0.15                              | 8.566  | 0.238              | 7.923   | 8.41            | 8.588  | 8.729           | 9.51                    |
| NTNG2  | NoVYXUvixD1LZ4frXs | rs7046350  | 4.29                         | 4.11             | -0.084               | 0.74                     | -17.06                        | 0.4296                            | 7.686  | 0.21               | 7.274   | 7.553           | 7.66   | 7.777           | 8.689                   |
| NTNG2  | NoVYXUvixD1LZ4frXs | rs1412076  | 3.62                         | 3.46             | -0.07                | 1.87                     | -9.24                         | 0.4175                            | 7.686  | 0.21               | 7.274   | 7.553           | 7.66   | 7.777           | 8.689                   |
| NTNG2  | NoVYXUvixD1LZ4frXs | rs6597551  | 3.35                         | 3.21             | -0.065               | 2.52                     | 8.59                          | 0.4648                            | 7.686  | 0.21               | 7.274   | 7.553           | 7.66   | 7.777           | 8.689                   |
| NUB1   | Qp1JLbXR5IGR13sjs  | rs6964641  | 4.36                         | 4.17             | -0.086               | 2.55                     | -32.33                        | 0.2161                            | 10.101 | 0.433              | 8.962   | 9.845           | 10.208 | 10.383          | 10.965                  |
| NUDT18 | 0J.eRVS6TddNG97lfc | rs1456     | 5.1                          | 4.88             | 0.104                | 2.49                     | -12.16                        | 0.4125                            | 9.231  | 0.328              | 8.501   | 8.997           | 9.177  | 9.419           | 10.563                  |
| NUDT18 | 0J.eRVS6TddNG97lfc | rs9644091  | 11.21                        | 10.70            | 0.226                | 7.8                      | -6.45                         | 0.33                              | 9.231  | 0.328              | 8.501   | 8.997           | 9.177  | 9.419           | 10.563                  |

| Symbol   | Lumi nuID           | SNP        | Population-based             | Population-based                      | % Variance Explained | Family-based                 | Distance from transcript (kb) | MAF    | Mean   | Transcript abundance (log2 scale) |         |                 |        |                 | SNP mapping under probe |
|----------|---------------------|------------|------------------------------|---------------------------------------|----------------------|------------------------------|-------------------------------|--------|--------|-----------------------------------|---------|-----------------|--------|-----------------|-------------------------|
|          |                     |            | association p-value (-log10) | association p-value (-log10), GC adj. |                      | association p-value (-log10) |                               |        |        | Standard Deviation                | Minimum | 25th percentile | Median | 75th percentile |                         |
| NUDT18   | OJ.eRVS6TddNG97Itc  | rs1005901  | 11.46                        | 10.93                                 | -0.233               | 5.8                          | -0.01                         | 0.4625 | 9.231  | 0.328                             | 8.501   | 8.997           | 9.177  | 9.419           | 10.563                  |
| NUDT18   | OJ.eRVS6TddNG97Itc  | rs7836362  | 10.76                        | 10.27                                 | 0.218                | 5.14                         | 2.56                          | 0.4975 | 9.231  | 0.328                             | 8.501   | 8.997           | 9.177  | 9.419           | 10.563                  |
| NUDT18   | OJ.eRVS6TddNG97Itc  | rs11135859 | 6.33                         | 6.05                                  | -0.129               | 4.93                         | 10.2                          | 0.4246 | 9.231  | 0.328                             | 8.501   | 8.997           | 9.177  | 9.419           | 10.563                  |
| NUDT18   | OJ.eRVS6TddNG97Itc  | rs13256571 | 3.77                         | 3.61                                  | -0.078               | 1.43                         | 14.08                         | 0.105  | 9.231  | 0.328                             | 8.501   | 8.997           | 9.177  | 9.419           | 10.563                  |
| NUDT18   | OJ.eRVS6TddNG97Itc  | rs6557841  | 7.16                         | 6.84                                  | -0.146               | 5.4                          | 20.65                         | 0.41   | 9.231  | 0.328                             | 8.501   | 8.997           | 9.177  | 9.419           | 10.563                  |
| NUDT18   | OJ.eRVS6TddNG97Itc  | rs12679786 | 4.3                          | 4.11                                  | -0.088               | 1.7                          | 39.42                         | 0.1625 | 9.231  | 0.328                             | 8.501   | 8.997           | 9.177  | 9.419           | 10.563                  |
| NUDT18   | OJ.eRVS6TddNG97Itc  | rs7838257  | 3.91                         | 3.74                                  | -0.08                | 1.58                         | 40.61                         | 0.1558 | 9.231  | 0.328                             | 8.501   | 8.997           | 9.177  | 9.419           | 10.563                  |
| NUDT2    | 6upfcl4JRXStSoK_54  | rs7028914  | 14.8                         | 14.11                                 | -0.277               | 7.06                         | -44.78                        | 0.1325 | 9.949  | 0.425                             | 8.865   | 9.639           | 9.949  | 10.237          | 10.795                  |
| NUDT2    | 6upfcl4JRXStSoK_54  | rs10972047 | 17.28                        | 16.47                                 | -0.318               | 6.83                         | -19.15                        | 0.125  | 9.949  | 0.425                             | 8.865   | 9.639           | 9.949  | 10.237          | 10.795                  |
| NUDT2    | 6upfcl4JRXStSoK_54  | rs7039222  | 19.65                        | 18.73                                 | 0.357                | 7.16                         | 3.24                          | 0.1225 | 9.949  | 0.425                             | 8.865   | 9.639           | 9.949  | 10.237          | 10.795                  |
| NUDT2    | 6upfcl4JRXStSoK_54  | rs4879775  | 16.56                        | 15.79                                 | -0.308               | 7.38                         | 5.29                          | 0.1307 | 9.949  | 0.425                             | 8.865   | 9.639           | 9.949  | 10.237          | 10.795                  |
| NUDT2    | 6upfcl4JRXStSoK_54  | rs10972072 | 10.09                        | 9.63                                  | -0.203               | 1.8                          | 5.05                          | 0.235  | 9.949  | 0.425                             | 8.865   | 9.639           | 9.949  | 10.237          | 10.795                  |
| NUDT2    | 6upfcl4JRXStSoK_54  | rs2381117  | 9.67                         | 9.23                                  | -0.194               | 1.81                         | 38.48                         | 0.2325 | 9.949  | 0.425                             | 8.865   | 9.639           | 9.949  | 10.237          | 10.795                  |
| NUDT6    | Bh3unilKISSPFKM59E  | rs308382   | 4.22                         | 4.04                                  | -0.081               | 1.98                         | -30.61                        | 0.155  | 7.311  | 0.101                             | 7.107   | 7.233           | 7.309  | 7.378           | 7.612                   |
| NUDT6    | Bh3unilKISSPFKM59E  | rs17408557 | 3.55                         | 3.40                                  | 0.067                | 1.4                          | -13.18                        | 0.145  | 7.311  | 0.101                             | 7.107   | 7.233           | 7.309  | 7.378           | 7.612                   |
| NUP85    | Kjht2j5V2t.ejh3nhl  | rs11657106 | 4.59                         | 4.39                                  | -0.092               | 2.41                         | 2.35                          | 0.236  | 9.864  | 0.264                             | 9.138   | 9.685           | 9.836  | 10.007          | 10.656                  |
| NUP85    | Kjht2j5V2t.ejh3nhl  | rs1871269  | 3.8                          | 3.64                                  | -0.074               | 2.58                         | -10.85                        | 0.2437 | 9.864  | 0.264                             | 9.138   | 9.685           | 9.836  | 10.007          | 10.656                  |
| NUP85    | Kjht2j5V2t.ejh3nhl  | rs1478785  | 3.77                         | 3.60                                  | 0.074                | 2.71                         | -8.99                         | 0.25   | 9.864  | 0.264                             | 9.138   | 9.685           | 9.836  | 10.007          | 10.656                  |
| NYD-SP26 | okEAqMU7iPuQy3JSck  | rs17148537 | 4.08                         | 3.90                                  | -0.079               | 1.19                         | -35.34                        | 0.1097 | 7.11   | 0.008                             | 7.092   | 7.105           | 7.109  | 7.115           | 7.155                   |
| OAS1     | HdefXV5T01eVd1OCfg  | rs11066435 | 5.63                         | 5.38                                  | 0.109                | 1.83                         | -47.04                        | 0.085  | 8.151  | 0.633                             | 7.177   | 7.76            | 8.14   | 8.447           | 11.18                   |
| OAS1     | HdefXV5T01eVd1OCfg  | rs7965538  | 8.37                         | 7.99                                  | -0.159               | 2.97                         | -3.14                         | 0.215  | 8.151  | 0.633                             | 7.177   | 7.76            | 8.14   | 8.447           | 11.18                   |
| OAS1     | HdefXV5T01eVd1OCfg  | rs4583033  | 5.87                         | 5.61                                  | -0.114               | 2.76                         | -2.82                         | 0.2588 | 8.151  | 0.633                             | 7.177   | 7.76            | 8.14   | 8.447           | 11.18                   |
| OAS1     | HdefXV5T01eVd1OCfg  | rs3741981  | 16.01                        | 15.27                                 | -0.296               | 6.86                         | 4.13                          | 0.4625 | 8.151  | 0.633                             | 7.177   | 7.76            | 8.14   | 8.447           | 11.18                   |
| OAS1     | HdefXV5T01eVd1OCfg  | rs3177979  | 21.45                        | 20.44                                 | -0.393               | 9.8                          | 1.38                          | 0.3662 | 8.151  | 0.633                             | 7.177   | 7.76            | 8.14   | 8.447           | 11.18                   |
| OAS1     | HdefXV5T01eVd1OCfg  | rs1859333  | 20.08                        | 19.14                                 | -0.367               | 9.43                         | 15.13                         | 0.38   | 8.151  | 0.633                             | 7.177   | 7.76            | 8.14   | 8.447           | 11.18                   |
| OAS1     | HdefXV5T01eVd1OCfg  | rs10774679 | 20.49                        | 19.53                                 | 0.373                | 9.39                         | 18.92                         | 0.3825 | 8.151  | 0.633                             | 7.177   | 7.76            | 8.14   | 8.447           | 11.18                   |
| OAS1     | HdefXV5T01eVd1OCfg  | rs2269899  | 17.93                        | 17.09                                 | 0.336                | 7.67                         | 26.12                         | 0.365  | 8.151  | 0.633                             | 7.177   | 7.76            | 8.14   | 8.447           | 11.18                   |
| OAS1     | HdefXV5T01eVd1OCfg  | rs7970893  | 8.56                         | 8.17                                  | -0.165               | 5.8                          | 34.85                         | 0.4825 | 8.151  | 0.633                             | 7.177   | 7.76            | 8.14   | 8.447           | 11.18                   |
| OAS1     | HdefXV5T01eVd1OCfg  | rs2072135  | 6.33                         | 6.05                                  | 0.125                | 2.28                         | 43.35                         | 0.305  | 8.151  | 0.633                             | 7.177   | 7.76            | 8.14   | 8.447           | 11.18                   |
| OAS2     | x1191.eKOVxXsEC2.c  | rs1859333  | 8.57                         | 8.18                                  | 0.174                | 4.44                         | -45.31                        | 0.38   | 9.778  | 0.329                             | 8.885   | 9.592           | 9.794  | 9.985           | 11.021                  |
| OAS2     | x1191.eKOVxXsEC2.c  | rs10774679 | 8.99                         | 8.58                                  | -0.183               | 4.53                         | -41.53                        | 0.3825 | 9.778  | 0.329                             | 8.885   | 9.592           | 9.794  | 9.985           | 11.021                  |
| OAS2     | x1191.eKOVxXsEC2.c  | rs2269899  | 10.16                        | 9.70                                  | -0.207               | 4.91                         | -34.32                        | 0.365  | 9.778  | 0.329                             | 8.885   | 9.592           | 9.794  | 9.985           | 11.021                  |
| OAS2     | x1191.eKOVxXsEC2.c  | rs7970893  | 4.83                         | 4.62                                  | 0.094                | 2.84                         | -25.59                        | 0.4825 | 9.778  | 0.329                             | 8.885   | 9.592           | 9.794  | 9.985           | 11.021                  |
| OAS2     | x1191.eKOVxXsEC2.c  | rs2072135  | 13.54                        | 12.92                                 | -0.271               | 5.01                         | -17.09                        | 0.305  | 9.778  | 0.329                             | 8.885   | 9.592           | 9.794  | 9.985           | 11.021                  |
| OAS2     | x1191.eKOVxXsEC2.c  | rs1293770  | 5.19                         | 4.96                                  | 0.1                  | 2.44                         | -4.74                         | 0.155  | 9.778  | 0.329                             | 8.885   | 9.592           | 9.794  | 9.985           | 11.021                  |
| OAS2     | x1191.eKOVxXsEC2.c  | rs12821546 | 4.21                         | 4.03                                  | -0.081               | 1.45                         | -4.63                         | 0.185  | 9.778  | 0.329                             | 8.885   | 9.592           | 9.794  | 9.985           | 11.021                  |
| OAS2     | x1191.eKOVxXsEC2.c  | rs12422608 | 14.2                         | 13.55                                 | -0.277               | 5.6                          | -2.15                         | 0.3175 | 9.778  | 0.329                             | 8.885   | 9.592           | 9.794  | 9.985           | 11.021                  |
| OAS2     | x1191.eKOVxXsEC2.c  | rs1293764  | 11.26                        | 10.75                                 | 0.232                | 4.89                         | -0.93                         | 0.3375 | 9.778  | 0.329                             | 8.885   | 9.592           | 9.794  | 9.985           | 11.021                  |
| OAS2     | x1191.eKOVxXsEC2.c  | rs757402   | 8.57                         | 8.18                                  | -0.175               | 4.75                         | 2.49                          | 0.3342 | 9.778  | 0.329                             | 8.885   | 9.592           | 9.794  | 9.985           | 11.021                  |
| OAS2     | x1191.eKOVxXsEC2.c  | rs1293758  | 3.33                         | 3.19                                  | 0.062                | 4.33                         | 6.98                          | 0.465  | 9.778  | 0.329                             | 8.885   | 9.592           | 9.794  | 9.985           | 11.021                  |
| OAS2     | x1191.eKOVxXsEC2.c  | rs2072137  | 9.32                         | 8.90                                  | 0.19                 | 4.51                         | 14.31                         | 0.4225 | 9.778  | 0.329                             | 8.885   | 9.592           | 9.794  | 9.985           | 11.021                  |
| OAS2     | x1191.eKOVxXsEC2.c  | rs15895    | 5.75                         | 5.50                                  | -0.119               | 3.95                         | 21.68                         | 0.38   | 9.778  | 0.329                             | 8.885   | 9.592           | 9.794  | 9.985           | 11.021                  |
| OAS2     | x1191.eKOVxXsEC2.c  | rs13311    | 7.53                         | 7.20                                  | 0.156                | 3.58                         | 22.04                         | 0.39   | 9.778  | 0.329                             | 8.885   | 9.592           | 9.794  | 9.985           | 11.021                  |
| OAS2     | x1191.eKOVxXsEC2.c  | rs10492029 | 6.63                         | 6.33                                  | 0.137                | 5.19                         | 32.07                         | 0.405  | 9.778  | 0.329                             | 8.885   | 9.592           | 9.794  | 9.985           | 11.021                  |
| OAT      | WqOfok7bXh9iMhOh96U | rs2491161  | 4.13                         | 3.96                                  | -0.076               | 1.62                         | -3.43                         | 0.16   | 8.944  | 0.293                             | 7.417   | 8.791           | 8.975  | 9.143           | 9.564                   |
| OCEL1    | i5A5d9L_h0neEIXXUo  | rs8107108  | 5.03                         | 4.81                                  | -0.1                 | 2.83                         | -25.75                        | 0.075  | 9.754  | 0.311                             | 8.815   | 9.551           | 9.745  | 9.962           | 10.602                  |
| OCEL1    | i5A5d9L_h0neEIXXUo  | rs2288542  | 5.01                         | 4.79                                  | 0.096                | 2.36                         | 0.17                          | 0.4825 | 9.754  | 0.311                             | 8.815   | 9.551           | 9.745  | 9.962           | 10.602                  |
| OCEL1    | i5A5d9L_h0neEIXXUo  | rs4808611  | 5.15                         | 4.92                                  | -0.104               | 1.53                         | 14.8                          | 0.1825 | 9.754  | 0.311                             | 8.815   | 9.551           | 9.745  | 9.962           | 10.602                  |
| OCEL1    | i5A5d9L_h0neEIXXUo  | rs8170     | 7.03                         | 6.71                                  | 0.143                | 1.79                         | 49.68                         | 0.1834 | 9.754  | 0.311                             | 8.815   | 9.551           | 9.745  | 9.962           | 10.602                  |
| OCIAD2   | ZJJTSUC_RkeXXxe4o   | rs2289065  | 8.96                         | 8.56                                  | 0.181                | 3.56                         | 7.58                          | 0.3274 | 9.908  | 0.534                             | 8.264   | 9.553           | 9.934  | 10.267          | 11.074                  |
| OCIAD2   | ZJJTSUC_RkeXXxe4o   | rs2085292  | 5.8                          | 5.54                                  | -0.119               | 3.15                         | 6.12                          | 0.46   | 9.908  | 0.534                             | 8.264   | 9.553           | 9.934  | 10.267          | 11.074                  |
| OCIAD2   | ZJJTSUC_RkeXXxe4o   | rs2247481  | 6.69                         | 6.39                                  | -0.134               | 3.17                         | 28.01                         | 0.37   | 9.908  | 0.534                             | 8.264   | 9.553           | 9.934  | 10.267          | 11.074                  |
| ODF2L    | BuSFkBEU8qJ9KIK_Og  | rs1334149  | 9.34                         | 8.92                                  | -0.187               | 2.46                         | 37.02                         | 0.1175 | 8.541  | 0.302                             | 7.539   | 8.352           | 8.523  | 8.759           | 9.366                   |
| OGN      | WrlisC.cAwT13R_xVE  | rs944949   | 4.11                         | 3.94                                  | 0.083                | 0.53                         | -5.65                         | 0.1225 | 7.152  | 0.054                             | 7.103   | 7.125           | 7.137  | 7.155           | 7.446                   |
| OPA3     | 6dJiitVe1CarPUUpTM  | rs7250901  | 3.39                         | 3.25                                  | -0.065               | 2.59                         | -43.8                         | 0.445  | 7.249  | 0.088                             | 7.113   | 7.184           | 7.241  | 7.297           | 7.544                   |
| OPRM1    | obSBHhRV1GiDEujIE   | rs6923231  | 3.38                         | 3.24                                  | -0.063               | 0.78                         | 31.69                         | 0.0975 | 7.144  | 0.03                              | 7.1     | 7.127           | 7.137  | 7.153           | 7.356                   |
| OPRM1    | obSBHhRV1GiDEujIE   | rs9479756  | 3.34                         | 3.20                                  | -0.062               | 1                            | -30.19                        | 0.1    | 7.144  | 0.03                              | 7.1     | 7.127           | 7.137  | 7.153           | 7.356                   |
| OPRM1    | obSBHhRV1GiDEujIE   | rs636433   | 3.65                         | 3.50                                  | -0.07                | 1                            | 12.18                         | 0.12   | 7.144  | 0.03                              | 7.1     | 7.127           | 7.137  | 7.153           | 7.356                   |
| OPRM1    | obSBHhRV1GiDEujIE   | rs544093   | 3.65                         | 3.50                                  | -0.07                | 1                            | 17.19                         | 0.12   | 7.144  | 0.03                              | 7.1     | 7.127           | 7.137  | 7.153           | 7.356                   |
| OPTN     | feivLO57uLyC09_eII  | rs17512962 | 11.8                         | 11.26                                 | 0.23                 | 4.22                         | -11.21                        | 0.32   | 10.322 | 0.462                             | 7.473   | 10.098          | 10.384 | 10.636          | 11.218                  |
| OPTN     | feivLO57uLyC09_eII  | rs825411   | 5.47                         | 5.23                                  | -0.108               | 2.3                          | -10.9                         | 0.4425 | 10.322 | 0.462                             | 7.473   | 10.098          | 10.384 | 10.636          | 11.218                  |
| OR10A3   | 0NN33uldVaxyJ_7uSE  | rs7109112  | 3.32                         | 3.18                                  | 0.065                | 1.19                         | -14.3                         | 0.175  | 7.125  | 0.036                             | 7.098   | 7.115           | 7.12   | 7.128           | 7.597                   |

| Symbol  | Lumi nuID           | SNP        | Population-based | Population-based          | % Variance | Family-based     | Distance from   | MAF    | Mean      | Transcript abundance (log2 scale) |            |            |            |         | SNP mapping under probe |     |
|---------|---------------------|------------|------------------|---------------------------|------------|------------------|-----------------|--------|-----------|-----------------------------------|------------|------------|------------|---------|-------------------------|-----|
|         |                     |            | association      | association               |            | association      |                 |        |           | Standard                          | 25th       | Median     | 75th       | Maximum |                         |     |
|         |                     |            | p-value (-log10) | p-value (-log10), GC adj. | Explained  | p-value (-log10) | transcript (kb) |        | Deviation | Minimum                           | percentile | percentile | percentile | Maximum |                         |     |
| OR3A3   | fSXSax470qZ3u0nH7o  | rs227787   | 3.43             | 3.29                      | -0.066     | 0.65             | -0.02           | 0.2525 | 7.116     | 0.016                             | 7.095      | 7.105      | 7.112      | 7.12    | 7.194                   |     |
| OR521I  | rpKMy5X5EVC55yeF7E  | rs4910512  | 3.33             | 3.19                      | 0.062      | 0.45             | 11.42           | 0.4375 | 7.14      | 0.026                             | 7.105      | 7.122      | 7.134      | 7.152   | 7.244                   |     |
| OR52I2  | ctR1x7iRMn_IK8k7ng  | rs16923484 | 3.79             | 3.62                      | 0.072      | 1.58             | 49.99           | 0.0575 | 7.132     | 0.03                              | 7.103      | 7.117      | 7.125      | 7.138   | 7.364                   |     |
| OR56A1  | Zmg5n3x5FT1zXR9XnU  | rs7946925  | 3.98             | 3.81                      | 0.078      | 1.69             | 2.88            | 0.2375 | 7.141     | 0.034                             | 7.101      | 7.119      | 7.131      | 7.154   | 7.317                   |     |
| OR7D2   | Eq.gk.nMn_83QuukSI  | rs7254803  | 6.02             | 5.76                      | 0.114      | 2.36             | 0.08            | 0.351  | 7.189     | 0.14                              | 7.103      | 7.126      | 7.138      | 7.168   | 7.96                    |     |
| OR7D2   | Eq.gk.nMn_83QuukSI  | rs10415904 | 11.22            | 10.70                     | -0.221     | 5.06             | 14.64           | 0.1742 | 7.189     | 0.14                              | 7.103      | 7.126      | 7.138      | 7.168   | 7.96                    |     |
| ORMDL3  | u5lggLiLqJeJep6Jfc  | rs11557467 | 7.95             | 7.59                      | -0.161     | 3.42             | -48.66          | 0.42   | 9.037     | 0.479                             | 8.075      | 8.717      | 9.001      | 9.333   | 10.583                  |     |
| ORMDL3  | u5lggLiLqJeJep6Jfc  | rs2872507  | 8.48             | 8.09                      | 0.172      | 2.75             | -36.53          | 0.4    | 9.037     | 0.479                             | 8.075      | 8.717      | 9.001      | 9.333   | 10.583                  |     |
| ORMDL3  | u5lggLiLqJeJep6Jfc  | rs8067378  | 8.36             | 7.98                      | -0.169     | 3.03             | -25.95          | 0.4225 | 9.037     | 0.479                             | 8.075      | 8.717      | 9.001      | 9.333   | 10.583                  |     |
| ORMDL3  | u5lggLiLqJeJep6Jfc  | rs2305480  | 9                | 8.59                      | 0.182      | 2.82             | -15.1           | 0.3825 | 9.037     | 0.479                             | 8.075      | 8.717      | 9.001      | 9.333   | 10.583                  |     |
| ORMDL3  | u5lggLiLqJeJep6Jfc  | rs2290400  | 8.91             | 8.51                      | 0.182      | 3.34             | -11.06          | 0.4141 | 9.037     | 0.479                             | 8.075      | 8.717      | 9.001      | 9.333   | 10.583                  |     |
| ORMDL3  | u5lggLiLqJeJep6Jfc  | rs7216389  | 8.16             | 7.79                      | 0.165      | 3.39             | -7.35           | 0.4175 | 9.037     | 0.479                             | 8.075      | 8.717      | 9.001      | 9.333   | 10.583                  |     |
| ORMDL3  | u5lggLiLqJeJep6Jfc  | rs3744246  | 8.03             | 7.67                      | -0.165     | 5.37             | 0.5             | 0.1775 | 9.037     | 0.479                             | 8.075      | 8.717      | 9.001      | 9.333   | 10.583                  |     |
| ORMDL3  | u5lggLiLqJeJep6Jfc  | rs4795402  | 7.1              | 6.78                      | 0.146      | 5.8              | 1.53            | 0.1975 | 9.037     | 0.479                             | 8.075      | 8.717      | 9.001      | 9.333   | 10.583                  |     |
| ORMDL3  | u5lggLiLqJeJep6Jfc  | rs4795405  | 9.98             | 9.52                      | -0.202     | 3.73             | 4.56            | 0.3675 | 9.037     | 0.479                             | 8.075      | 8.717      | 9.001      | 9.333   | 10.583                  |     |
| ORMDL3  | u5lggLiLqJeJep6Jfc  | rs8079416  | 7.1              | 6.78                      | -0.147     | 3.11             | 8.86            | 0.4749 | 9.037     | 0.479                             | 8.075      | 8.717      | 9.001      | 9.333   | 10.583                  |     |
| ORMDL3  | u5lggLiLqJeJep6Jfc  | rs1007654  | 5.16             | 4.94                      | 0.104      | 0.79             | 27.5            | 0.3425 | 9.037     | 0.479                             | 8.075      | 8.717      | 9.001      | 9.333   | 10.583                  |     |
| ORMDL3  | u5lggLiLqJeJep6Jfc  | rs7219080  | 5.2              | 4.97                      | 0.105      | 0.74             | 30.66           | 0.3417 | 9.037     | 0.479                             | 8.075      | 8.717      | 9.001      | 9.333   | 10.583                  |     |
| ORMDL3  | u5lggLiLqJeJep6Jfc  | rs3902025  | 7.77             | 7.42                      | 0.16       | 2.65             | 35.4            | 0.402  | 9.037     | 0.479                             | 8.075      | 8.717      | 9.001      | 9.333   | 10.583                  |     |
| ORMDL3  | u5lggLiLqJeJep6Jfc  | rs3894194  | 6.48             | 6.19                      | -0.133     | 2.77             | 38.14           | 0.4775 | 9.037     | 0.479                             | 8.075      | 8.717      | 9.001      | 9.333   | 10.583                  |     |
| ORMDL3  | u5lggLiLqJeJep6Jfc  | rs3859192  | 3.49             | 3.35                      | 0.067      | 0.93             | 44.79           | 0.495  | 9.037     | 0.479                             | 8.075      | 8.717      | 9.001      | 9.333   | 10.583                  |     |
| OSTM1   | fXyKU3jji9Uiejo1co  | rs10484904 | 3.49             | 3.34                      | -0.07      | 0.55             | -2.35           | 0.2975 | 8.861     | 0.18                              | 8.406      | 8.745      | 8.86       | 8.99    | 9.674                   |     |
| OSTM1   | fXyKU3jji9Uiejo1co  | rs17069204 | 3.52             | 3.37                      | -0.071     | 0.47             | -0.62           | 0.2965 | 8.861     | 0.18                              | 8.406      | 8.745      | 8.86       | 8.99    | 9.674                   |     |
| OTUB2   | Kp9UJKLlKoFOiILook  | rs3748328  | 3.42             | 3.27                      | 0.065      | 3.23             | 13.81           | 0.325  | 7.246     | 0.066                             | 7.11       | 7.198      | 7.239      | 7.282   | 7.476                   | Yes |
| OTUB2   | Kp9UJKLlKoFOiILook  | rs8017510  | 3.52             | 3.37                      | -0.068     | 3.35             | 29.74           | 0.3325 | 7.246     | 0.066                             | 7.11       | 7.198      | 7.239      | 7.282   | 7.476                   | Yes |
| P2RX5   | ilOoCK9eOmbnUKEmHIE | rs220488   | 3.55             | 3.40                      | 0.07       | 1.35             | -1.76           | 0.155  | 7.524     | 0.209                             | 7.124      | 7.383      | 7.479      | 7.652   | 8.069                   |     |
| P4HA2   | 0eV7n7qeQurdQwuvU4  | rs2089855  | 5.11             | 4.88                      | 0.106      | 3.22             | 9.97            | 0.435  | 7.144     | 0.022                             | 7.113      | 7.13       | 7.14       | 7.154   | 7.286                   |     |
| P4HA2   | 0eV7n7qeQurdQwuvU4  | rs4594848  | 5.11             | 4.88                      | -0.106     | 3.22             | 23.04           | 0.435  | 7.144     | 0.022                             | 7.113      | 7.13       | 7.14       | 7.154   | 7.286                   |     |
| PAAF1   | EYzXsF3hd4ffoCJLVo  | rs10793068 | 3.49             | 3.34                      | 0.068      | 1.49             | 30.53           | 0.3775 | 9.096     | 0.2                               | 7.987      | 8.992      | 9.124      | 9.217   | 9.467                   |     |
| PAAF1   | EYzXsF3hd4ffoCJLVo  | rs699138   | 3.85             | 3.69                      | -0.075     | 2.46             | 33.04           | 0.35   | 9.096     | 0.2                               | 7.987      | 8.992      | 9.124      | 9.217   | 9.467                   |     |
| PABPC4  | 6vcSnTTICAgniSCupk  | rs4660293  | 3.52             | 3.37                      | -0.065     | 1.96             | 1.69            | 0.245  | 10.844    | 0.259                             | 9.519      | 10.728     | 10.904     | 11.005  | 11.388                  |     |
| PAC3IN2 | EWWW0UnOT0db9S4kjs  | rs5759066  | 3.61             | 3.46                      | 0.064      | 2.47             | -44.85          | 0.4623 | 10.528    | 0.279                             | 9.74       | 10.344     | 10.519     | 10.711  | 11.303                  |     |
| PAC3IN2 | EWWW0UnOT0db9S4kjs  | rs5759070  | 3.6              | 3.45                      | 0.064      | 2.49             | -35.45          | 0.4625 | 10.528    | 0.279                             | 9.74       | 10.344     | 10.519     | 10.711  | 11.303                  |     |
| PAC3IN2 | EWWW0UnOT0db9S4kjs  | rs972579   | 3.6              | 3.45                      | 0.064      | 2.49             | -23.44          | 0.4625 | 10.528    | 0.279                             | 9.74       | 10.344     | 10.519     | 10.711  | 11.303                  |     |
| PAC3IN2 | EWWW0UnOT0db9S4kjs  | rs5759093  | 3.6              | 3.45                      | 0.064      | 2.54             | -1.16           | 0.4625 | 10.528    | 0.279                             | 9.74       | 10.344     | 10.519     | 10.711  | 11.303                  |     |
| PADI6   | uirX_YpTH1eF75o4_4  | rs6695214  | 4.19             | 4.01                      | 0.081      | 1.92             | -8.12           | 0.365  | 7.124     | 0.021                             | 7.096      | 7.111      | 7.117      | 7.131   | 7.263                   |     |
| PADI6   | uirX_YpTH1eF75o4_4  | rs6586538  | 3.71             | 3.55                      | 0.071      | 1.84             | 15.65           | 0.38   | 7.124     | 0.021                             | 7.096      | 7.111      | 7.117      | 7.131   | 7.263                   |     |
| PADI6   | uirX_YpTH1eF75o4_4  | rs6678862  | 3.65             | 3.50                      | 0.069      | 1.84             | 16.89           | 0.3775 | 7.124     | 0.021                             | 7.096      | 7.111      | 7.117      | 7.131   | 7.263                   |     |
| PADI6   | uirX_YpTH1eF75o4_4  | rs2800687  | 3.65             | 3.50                      | -0.069     | 1.84             | 35.56           | 0.3775 | 7.124     | 0.021                             | 7.096      | 7.111      | 7.117      | 7.131   | 7.263                   |     |
| PAFAH2  | Tv60nAHSeSXoSyJIFU  | rs12743484 | 3.61             | 3.46                      | 0.068      | 2.06             | 11.28           | 0.2175 | 9.009     | 0.341                             | 8.202      | 8.789      | 8.967      | 9.201   | 10.298                  |     |
| PAK4    | 3eq5XfBUqjSwV7ni0M  | rs8112664  | 3.65             | 3.50                      | -0.072     | 0.72             | -31.69          | 0.3625 | 7.15      | 0.038                             | 7.1        | 7.122      | 7.141      | 7.167   | 7.305                   |     |
| PAPD1   | BdPpVfBet4L3qO.0v4  | rs2480296  | 7.49             | 7.15                      | 0.136      | 3.42             | 8.05            | 0.345  | 9.166     | 0.222                             | 8.423      | 9.024      | 9.185      | 9.309   | 9.706                   | Yes |
| PAPD1   | BdPpVfBet4L3qO.0v4  | rs11007990 | 6.48             | 6.19                      | 0.118      | 1.74             | 17.7            | 0.4375 | 9.166     | 0.222                             | 8.423      | 9.024      | 9.185      | 9.309   | 9.706                   | Yes |
| PAPD1   | BdPpVfBet4L3qO.0v4  | rs913644   | 6.41             | 6.13                      | 0.117      | 1.58             | -12.73          | 0.05   | 9.166     | 0.222                             | 8.423      | 9.024      | 9.185      | 9.309   | 9.706                   | Yes |
| PAPD1   | BdPpVfBet4L3qO.0v4  | rs11818836 | 6.14             | 5.87                      | -0.112     | 1.43             | 2.89            | 0.4397 | 9.166     | 0.222                             | 8.423      | 9.024      | 9.185      | 9.309   | 9.706                   | Yes |
| PAPD1   | BdPpVfBet4L3qO.0v4  | rs10826790 | 5.98             | 5.72                      | -0.109     | 1.74             | 5.62            | 0.445  | 9.166     | 0.222                             | 8.423      | 9.024      | 9.185      | 9.309   | 9.706                   | Yes |
| PAPD1   | BdPpVfBet4L3qO.0v4  | rs2484290  | 5.59             | 5.34                      | 0.102      | 2.85             | 12.69           | 0.3317 | 9.166     | 0.222                             | 8.423      | 9.024      | 9.185      | 9.309   | 9.706                   | Yes |
| PAPSS1  | 3gFF4K.Tp1Qp_hbnhl  | rs2522422  | 3.72             | 3.57                      | 0.071      | 0.68             | -29.48          | 0.07   | 9.961     | 0.232                             | 8.905      | 9.838      | 9.962      | 10.081  | 10.813                  |     |
| PAPSS1  | 3gFF4K.Tp1Qp_hbnhl  | rs2522425  | 3.85             | 3.69                      | -0.073     | 0.7              | -23.19          | 0.0675 | 9.961     | 0.232                             | 8.905      | 9.838      | 9.962      | 10.081  | 10.813                  |     |
| PAPSS1  | 3gFF4K.Tp1Qp_hbnhl  | rs973126   | 6.54             | 6.25                      | -0.133     | 1.36             | -0.12           | 0.105  | 9.961     | 0.232                             | 8.905      | 9.838      | 9.962      | 10.081  | 10.813                  |     |
| PAPSS1  | 3gFF4K.Tp1Qp_hbnhl  | rs16780    | 6.35             | 6.07                      | -0.129     | 1.36             | 1.53            | 0.1075 | 9.961     | 0.232                             | 8.905      | 9.838      | 9.962      | 10.081  | 10.813                  |     |
| PAPSS1  | 3gFF4K.Tp1Qp_hbnhl  | rs6533319  | 6.35             | 6.07                      | -0.129     | 1.36             | 22.57           | 0.1075 | 9.961     | 0.232                             | 8.905      | 9.838      | 9.962      | 10.081  | 10.813                  |     |
| PAPSS1  | 3gFF4K.Tp1Qp_hbnhl  | rs2522447  | 5.78             | 5.53                      | -0.117     | 1.3              | 23.16           | 0.11   | 9.961     | 0.232                             | 8.905      | 9.838      | 9.962      | 10.081  | 10.813                  |     |
| PAPSS1  | 3gFF4K.Tp1Qp_hbnhl  | rs2158179  | 6                | 5.74                      | -0.12      | 1.43             | 41.49           | 0.1    | 9.961     | 0.232                             | 8.905      | 9.838      | 9.962      | 10.081  | 10.813                  |     |
| PAQR8   | BXUjPPTi8dICpHIPtU  | rs560243   | 4.27             | 4.08                      | -0.084     | 2.02             | -28.14          | 0.2525 | 10.13     | 0.401                             | 8.022      | 9.881      | 10.131     | 10.403  | 11.166                  |     |
| PAQR8   | BXUjPPTi8dICpHIPtU  | rs474848   | 6.08             | 5.81                      | 0.119      | 3.27             | -0.46           | 0.2775 | 10.13     | 0.401                             | 8.022      | 9.881      | 10.131     | 10.403  | 11.166                  |     |
| PAQR8   | BXUjPPTi8dICpHIPtU  | rs17651289 | 3.95             | 3.78                      | -0.075     | 2.43             | 2.56            | 0.1975 | 10.13     | 0.401                             | 8.022      | 9.881      | 10.131     | 10.403  | 11.166                  |     |
| PAQR8   | BXUjPPTi8dICpHIPtU  | rs649330   | 3.95             | 3.78                      | 0.075      | 2.43             | 3.34            | 0.1975 | 10.13     | 0.401                             | 8.022      | 9.881      | 10.131     | 10.403  | 11.166                  |     |
| PASK    | cCUGLove1nmJeiOqBI  | rs13411510 | 3.72             | 3.56                      | 0.071      | 0.9              | -29.86          | 0.1784 | 10.801    | 0.622                             | 8.826      | 10.465     | 10.79      | 11.213  | 12.515                  |     |
| PASK    | cCUGLove1nmJeiOqBI  | rs2108485  | 7.47             | 7.13                      | -0.151     | 1.75             | -23.77          | 0.1575 | 10.801    | 0.622                             | 8.826      | 10.465     | 10.79      | 11.213  | 12.515                  |     |
| PASK    | cCUGLove1nmJeiOqBI  | rs2286323  | 5.36             | 5.13                      | -0.107     | 1.55             | -8.72           | 0.0875 | 10.801    | 0.622                             | 8.826      | 10.465     | 10.79      | 11.213  | 12.515                  |     |
| PASK    | cCUGLove1nmJeiOqBI  | rs1131293  | 7.22             | 6.89                      | -0.146     | 1.95             | 1.27            | 0.1025 | 10.801    | 0.622                             | 8.826      | 10.465     | 10.79      | 11.213  | 12.515                  |     |

| Symbol  | Lumi nuID          | SNP        | Population-based association |                      |                           | Family-based association |                               |        | Transcript abundance (log2 scale) |                    |                 |        |                 |         | SNP mapping under probe |     |
|---------|--------------------|------------|------------------------------|----------------------|---------------------------|--------------------------|-------------------------------|--------|-----------------------------------|--------------------|-----------------|--------|-----------------|---------|-------------------------|-----|
|         |                    |            | p-value (-log10)             | % Variance Explained | p-value (-log10), GC Adj. | p-value (-log10)         | Distance from transcript (kb) | MAF    | Mean                              | Standard Deviation | 25th percentile | Median | 75th percentile | Maximum |                         |     |
| PASK    | cCUGLove1nmJeiOqBI | rs2074824  | 7.22                         | 6.89                 | 0.146                     | 1.95                     | 6.26                          | 0.1025 | 10.801                            | 0.622              | 8.826           | 10.465 | 10.79           | 11.213  | 12.515                  |     |
| PAX8    | cUDufXknRIRScCoVA  | rs902695   | 5.59                         | 5.34                 | -0.112                    | 4.33                     | -19.86                        | 0.4874 | 7.193                             | 0.085              | 7.105           | 7.14   | 7.171           | 7.216   | 7.746                   |     |
| PAX8    | cUDufXknRIRScCoVA  | rs12620738 | 4.74                         | 4.53                 | 0.093                     | 3.92                     | -11.2                         | 0.4925 | 7.193                             | 0.085              | 7.105           | 7.14   | 7.171           | 7.216   | 7.746                   |     |
| PAX8    | cUDufXknRIRScCoVA  | rs4849179  | 7.98                         | 7.62                 | -0.158                    | 5.53                     | 10.23                         | 0.37   | 7.193                             | 0.085              | 7.105           | 7.14   | 7.171           | 7.216   | 7.746                   |     |
| PAX8    | cUDufXknRIRScCoVA  | rs2863242  | 3.93                         | 3.76                 | -0.076                    | 1.54                     | 14.3                          | 0.2525 | 7.193                             | 0.085              | 7.105           | 7.14   | 7.171           | 7.216   | 7.746                   |     |
| PCBP3   | oB75eIVdd3REleU54c | rs3827268  | 3.95                         | 3.78                 | -0.078                    | 1.5                      | -12.36                        | 0.07   | 7.145                             | 0.044              | 7.102           | 7.12   | 7.13            | 7.151   | 7.391                   |     |
| PCBP3   | oB75eIVdd3REleU54c | rs13050871 | 3.95                         | 3.78                 | 0.078                     | 1.5                      | -3.69                         | 0.07   | 7.145                             | 0.044              | 7.102           | 7.12   | 7.13            | 7.151   | 7.391                   |     |
| PCBP3   | oB75eIVdd3REleU54c | rs3827270  | 6.58                         | 6.29                 | -0.138                    | 1.42                     | 17.45                         | 0.07   | 7.145                             | 0.044              | 7.102           | 7.12   | 7.13            | 7.151   | 7.391                   |     |
| PCDH17  | Kku4geCz940d0h7XW4 | rs2592873  | 3.83                         | 3.67                 | 0.076                     | 0.5                      | -18.98                        | 0.2225 | 7.118                             | 0.016              | 7.096           | 7.109  | 7.115           | 7.121   | 7.212                   |     |
| PCDH17  | Kku4geCz940d0h7XW4 | rs2807625  | 3.83                         | 3.67                 | 0.076                     | 0.47                     | -10.07                        | 0.2225 | 7.118                             | 0.016              | 7.096           | 7.109  | 7.115           | 7.121   | 7.212                   |     |
| PCK2    | KeUopEgtOBv5L9S1Sk | rs3561     | 3.98                         | 3.81                 | -0.074                    | 1.34                     | -13.26                        | 0.3975 | 7.146                             | 0.03               | 7.103           | 7.124  | 7.14            | 7.157   | 7.261                   |     |
| PCK2    | KeUopEgtOBv5L9S1Sk | rs1951634  | 8.54                         | 8.15                 | 0.161                     | 3.55                     | -0.04                         | 0.3106 | 7.146                             | 0.03               | 7.103           | 7.124  | 7.14            | 7.157   | 7.261                   |     |
| PCK2    | KeUopEgtOBv5L9S1Sk | rs2277481  | 4.82                         | 4.61                 | 0.092                     | 1.08                     | 17.77                         | 0.3825 | 7.146                             | 0.03               | 7.103           | 7.124  | 7.14            | 7.157   | 7.261                   |     |
| PCK2    | KeUopEgtOBv5L9S1Sk | rs2277483  | 4.63                         | 4.43                 | 0.088                     | 1.15                     | 22.12                         | 0.33   | 7.146                             | 0.03               | 7.103           | 7.124  | 7.14            | 7.157   | 7.261                   |     |
| PCOLCE2 | uSK.JzePoBeWHY5rjl | rs2608069  | 3.37                         | 3.23                 | -0.066                    | 0.66                     | 8.94                          | 0.0675 | 7.123                             | 0.023              | 7.099           | 7.11   | 7.117           | 7.127   | 7.286                   |     |
| PCOTH   | W5KEOeUil610idGwk0 | rs1886972  | 4.11                         | 3.94                 | -0.08                     | 2.05                     | -26.8                         | 0.0704 | 7.133                             | 0.019              | 7.101           | 7.12   | 7.128           | 7.14    | 7.228                   |     |
| PCOTH   | W5KEOeUil610idGwk0 | rs1886970  | 3.29                         | 3.15                 | 0.063                     | 2.48                     | -22.53                        | 0.4246 | 7.133                             | 0.019              | 7.101           | 7.12   | 7.128           | 7.14    | 7.228                   |     |
| PCOTH   | W5KEOeUil610idGwk0 | rs1570979  | 4.3                          | 4.11                 | 0.085                     | 2.08                     | -21.47                        | 0.0707 | 7.133                             | 0.019              | 7.101           | 7.12   | 7.128           | 7.14    | 7.228                   |     |
| PCOTH   | W5KEOeUil610idGwk0 | rs9318700  | 3.43                         | 3.28                 | -0.066                    | 1.93                     | -20.55                        | 0.4196 | 7.133                             | 0.019              | 7.101           | 7.12   | 7.128           | 7.14    | 7.228                   |     |
| PCOTH   | W5KEOeUil610idGwk0 | rs2077709  | 3.42                         | 3.27                 | 0.066                     | 2.21                     | 9.83                          | 0.3995 | 7.133                             | 0.019              | 7.101           | 7.12   | 7.128           | 7.14    | 7.228                   |     |
| PCSK4   | Wlp6JFUAIKoC6KilBs | rs1047854  | 3.57                         | 3.42                 | -0.062                    | 1.74                     | 0.05                          | 0.3975 | 7.306                             | 0.12               | 7.116           | 7.231  | 7.281           | 7.353   | 8.033                   |     |
| PCSK4   | Wlp6JFUAIKoC6KilBs | rs2277748  | 4.52                         | 4.32                 | -0.081                    | 2.58                     | 5.23                          | 0.3141 | 7.306                             | 0.12               | 7.116           | 7.231  | 7.281           | 7.353   | 8.033                   |     |
| PDCD2   | cklk_Hqk16e30Xuelk | rs6932750  | 3.7                          | 3.54                 | -0.069                    | 1.11                     | -32.9                         | 0.4875 | 10.399                            | 0.229              | 9.248           | 10.271 | 10.393          | 10.537  | 11.314                  |     |
| PDCD2   | QeCHl6CqWZu705cxjA | rs6928833  | 4.96                         | 4.74                 | 0.096                     | 1.99                     | -20.26                        | 0.485  | 9.401                             | 0.246              | 8.819           | 9.228  | 9.396           | 9.57    | 10.164                  |     |
| PDCD2   | cklk_Hqk16e30Xuelk | rs6928833  | 3.98                         | 3.81                 | -0.075                    | 1.85                     | -15.87                        | 0.485  | 10.399                            | 0.229              | 9.248           | 10.271 | 10.393          | 10.537  | 11.314                  |     |
| PDCD2   | QeCHl6CqWZu705cxjA | rs2072916  | 4.92                         | 4.71                 | 0.095                     | 2.04                     | -9.7                          | 0.47   | 9.401                             | 0.246              | 8.819           | 9.228  | 9.396           | 9.57    | 10.164                  |     |
| PDCD2   | QeCHl6CqWZu705cxjA | rs960744   | 4.84                         | 4.63                 | -0.094                    | 1.82                     | -2.63                         | 0.4825 | 9.401                             | 0.246              | 8.819           | 9.228  | 9.396           | 9.57    | 10.164                  |     |
| PDCD2   | cklk_Hqk16e30Xuelk | rs960744   | 4.13                         | 3.96                 | 0.079                     | 1.86                     | 1.76                          | 0.4825 | 10.399                            | 0.229              | 9.248           | 10.271 | 10.393          | 10.537  | 11.314                  |     |
| PDE9A   | c7gAS4Kle5eKAmqpuK | rs4920137  | 3.38                         | 3.24                 | 0.061                     | 2.26                     | -55.5                         | 0.4196 | 7.55                              | 0.185              | 7.214           | 7.431  | 7.536           | 7.636   | 8.502                   |     |
| PDE9A   | c7gAS4Kle5eKAmqpuK | rs2269149  | 3.4                          | 3.25                 | 0.062                     | 2.2                      | -54.26                        | 0.4196 | 7.55                              | 0.185              | 7.214           | 7.431  | 7.536           | 7.636   | 8.502                   |     |
| PDE9A   | c7gAS4Kle5eKAmqpuK | rs2250870  | 4.01                         | 3.84                 | -0.075                    | 2.73                     | -38.43                        | 0.4375 | 7.55                              | 0.185              | 7.214           | 7.431  | 7.536           | 7.636   | 8.502                   |     |
| PDE9A   | c7gAS4Kle5eKAmqpuK | rs2839581  | 5.93                         | 5.67                 | 0.115                     | 1.71                     | -37.21                        | 0.3225 | 7.55                              | 0.185              | 7.214           | 7.431  | 7.536           | 7.636   | 8.502                   |     |
| PDE9A   | c7gAS4Kle5eKAmqpuK | rs10451852 | 3.82                         | 3.66                 | 0.069                     | 1.02                     | -34.34                        | 0.24   | 7.55                              | 0.185              | 7.214           | 7.431  | 7.536           | 7.636   | 8.502                   |     |
| PDF     | 6724FUI5i5_ElI60X8 | rs1127231  | 3.57                         | 3.42                 | -0.067                    | 1.56                     | -7.56                         | 0.304  | 7.218                             | 0.095              | 7.105           | 7.143  | 7.188           | 7.278   | 7.602                   |     |
| PDGFB   | HqKQR57UThdT9UC13k | rs5995693  | 3.54                         | 3.39                 | 0.062                     | 1.11                     | -37.05                        | 0.3875 | 7.339                             | 0.168              | 7.112           | 7.209  | 7.307           | 7.434   | 8.13                    |     |
| PDGFB   | HqKQR57UThdT9UC13k | rs2064309  | 4.01                         | 3.84                 | 0.072                     | 2.13                     | -20.42                        | 0.245  | 7.339                             | 0.168              | 7.112           | 7.209  | 7.307           | 7.434   | 8.13                    |     |
| PDGFB   | HqKQR57UThdT9UC13k | rs5757546  | 4.39                         | 4.21                 | -0.081                    | 1.29                     | -19.97                        | 0.45   | 7.339                             | 0.168              | 7.112           | 7.209  | 7.307           | 7.434   | 8.13                    |     |
| PDGFB   | HqKQR57UThdT9UC13k | rs742502   | 4.17                         | 3.99                 | -0.075                    | 1.11                     | -17.2                         | 0.3675 | 7.339                             | 0.168              | 7.112           | 7.209  | 7.307           | 7.434   | 8.13                    |     |
| PDGFB   | HqKQR57UThdT9UC13k | rs130657   | 4.42                         | 4.23                 | -0.079                    | 1.36                     | -9.07                         | 0.3725 | 7.339                             | 0.168              | 7.112           | 7.209  | 7.307           | 7.434   | 8.13                    |     |
| PDGFB   | HqKQR57UThdT9UC13k | rs135175   | 3.33                         | 3.19                 | -0.058                    | 1.76                     | -7.63                         | 0.305  | 7.339                             | 0.168              | 7.112           | 7.209  | 7.307           | 7.434   | 8.13                    |     |
| PDGFB   | HqKQR57UThdT9UC13k | rs9622978  | 5.15                         | 4.92                 | -0.094                    | 1.52                     | 5.35                          | 0.385  | 7.339                             | 0.168              | 7.112           | 7.209  | 7.307           | 7.434   | 8.13                    |     |
| PDGFB   | HqKQR57UThdT9UC13k | rs4821877  | 4.85                         | 4.63                 | -0.089                    | 2.21                     | -7.85                         | 0.4648 | 7.339                             | 0.168              | 7.112           | 7.209  | 7.307           | 7.434   | 8.13                    |     |
| PDGFB   | HqKQR57UThdT9UC13k | rs2247128  | 9.63                         | 9.19                 | 0.182                     | 3.61                     | -6.66                         | 0.3575 | 7.339                             | 0.168              | 7.112           | 7.209  | 7.307           | 7.434   | 8.13                    |     |
| PDGFB   | HqKQR57UThdT9UC13k | rs879180   | 6.74                         | 6.44                 | -0.127                    | 2.27                     | -5.4                          | 0.265  | 7.339                             | 0.168              | 7.112           | 7.209  | 7.307           | 7.434   | 8.13                    |     |
| PDGFB   | HqKQR57UThdT9UC13k | rs5757573  | 9.99                         | 9.54                 | 0.187                     | 4.81                     | -3.32                         | 0.3975 | 7.339                             | 0.168              | 7.112           | 7.209  | 7.307           | 7.434   | 8.13                    |     |
| PDI A6  | cgDuqunhJ6JU4H4    | rs1623958  | 3.68                         | 3.53                 | -0.069                    | 1.36                     | 27.69                         | 0.2725 | 8.897                             | 0.381              | 7.432           | 8.676  | 8.885           | 9.145   | 10                      |     |
| PDXK    | 9pXn7IO6O.uJdrXEkc | rs3746954  | 4.79                         | 4.58                 | -0.093                    | 3.41                     | -4.92                         | 0.206  | 10.216                            | 0.303              | 9.117           | 10.016 | 10.207          | 10.423  | 11.032                  | Yes |
| PDXK    | 9pXn7IO6O.uJdrXEkc | rs2276246  | 3.37                         | 3.23                 | -0.063                    | 1.42                     | 28.75                         | 0.1875 | 10.216                            | 0.303              | 9.117           | 10.016 | 10.207          | 10.423  | 11.032                  | Yes |
| PELO    | QWfV71YH94Ulq49S94 | rs2432144  | 4.27                         | 4.08                 | -0.079                    | 2.82                     | 34.81                         | 0.15   | 9.65                              | 0.332              | 8.726           | 9.439  | 9.686           | 9.895   | 10.275                  |     |
| PER3    | BEAitnUlcUS44eKX8  | rs228703   | 3.93                         | 3.76                 | 0.076                     | 0.98                     | 39.03                         | 0.3838 | 7.266                             | 0.094              | 7.111           | 7.199  | 7.25            | 7.318   | 7.616                   |     |
| PEX1    | HplxaJQLoihg1OBQUo | rs3814099  | 3.64                         | 3.48                 | -0.068                    | 1.31                     | -33.57                        | 0.08   | 8.489                             | 0.299              | 7.149           | 8.358  | 8.522           | 8.671   | 9.22                    |     |
| PEX1    | HplxaJQLoihg1OBQUo | rs10236856 | 3.42                         | 3.27                 | -0.066                    | 1.25                     | 19.35                         | 0.0773 | 8.489                             | 0.299              | 7.149           | 8.358  | 8.522           | 8.671   | 9.22                    |     |
| PEX1    | HplxaJQLoihg1OBQUo | rs10252324 | 3.61                         | 3.45                 | -0.07                     | 1.65                     | -13.06                        | 0.17   | 8.489                             | 0.299              | 7.149           | 8.358  | 8.522           | 8.671   | 9.22                    |     |
| PEX1    | HplxaJQLoihg1OBQUo | rs10488516 | 5.05                         | 4.83                 | 0.099                     | 1.92                     | 10.02                         | 0.125  | 8.489                             | 0.299              | 7.149           | 8.358  | 8.522           | 8.671   | 9.22                    |     |
| PEX1    | HplxaJQLoihg1OBQUo | rs758002   | 4.99                         | 4.78                 | -0.098                    | 1.98                     | 22.61                         | 0.1275 | 8.489                             | 0.299              | 7.149           | 8.358  | 8.522           | 8.671   | 9.22                    |     |
| PEX1    | HplxaJQLoihg1OBQUo | rs10276838 | 4.63                         | 4.43                 | -0.09                     | 1.82                     | 43.05                         | 0.1457 | 8.489                             | 0.299              | 7.149           | 8.358  | 8.522           | 8.671   | 9.22                    |     |
| PEX11A  | OQXuO6kiOKUIGiCook | rs8179043  | 3.75                         | 3.59                 | 0.072                     | 1.59                     | -14.14                        | 0.34   | 7.472                             | 0.109              | 7.157           | 7.394  | 7.458           | 7.537   | 8.047                   |     |
| PEX11A  | OQXuO6kiOKUIGiCook | rs2289487  | 5.16                         | 4.94                 | -0.101                    | 2.76                     | -9.19                         | 0.39   | 7.472                             | 0.109              | 7.157           | 7.394  | 7.458           | 7.537   | 8.047                   |     |
| PEX11A  | OQXuO6kiOKUIGiCook | rs17816376 | 8.4                          | 8.02                 | -0.164                    | 3.03                     | -0.4                          | 0.2085 | 7.472                             | 0.109              | 7.157           | 7.394  | 7.458           | 7.537   | 8.047                   |     |
| PEX11A  | OQXuO6kiOKUIGiCook | rs8023357  | 5.92                         | 5.66                 | 0.113                     | 3.54                     | 1.27                          | 0.2725 | 7.472                             | 0.109              | 7.157           | 7.394  | 7.458           | 7.537   | 8.047                   |     |
| PEX11A  | OQXuO6kiOKUIGiCook | rs3926649  | 5.49                         | 5.25                 | -0.107                    | 3.55                     | 15.56                         | 0.2197 | 7.472                             | 0.109              | 7.157           | 7.394  | 7.458           | 7.537   | 8.047                   |     |
| PEX5    | fqiMRwVUGOHnCXfl_0 | rs7958865  | 3.85                         | 3.69                 | 0.076                     | 2.28                     | -26.93                        | 0.1825 | 10.151                            | 0.272              | 9.374           | 9.97   | 10.179          | 10.348  | 10.705                  | Yes |

| Symbol  | Lumi nuID          | SNP        | Population-based association |                  | % Variance Explained | Family-based association |                               | Transcript abundance (log2 scale) |        |                    |         |                 |        |                 | SNP mapping under probe |         |
|---------|--------------------|------------|------------------------------|------------------|----------------------|--------------------------|-------------------------------|-----------------------------------|--------|--------------------|---------|-----------------|--------|-----------------|-------------------------|---------|
|         |                    |            | p-value (-log10)             | p-value (-log10) |                      | p-value (-log10)         | Distance from transcript (kb) | MAF                               | Mean   | Standard Deviation | Minimum | 25th percentile | Median | 75th percentile |                         | Maximum |
| PEX5    | fqiMRwvUgOHnCXfl_0 | rs12317363 | 4.65                         | 4.44             | 0.093                | 2.44                     | -24.8                         | 0.19                              | 10.151 | 0.272              | 9.374   | 9.97            | 10.179 | 10.348          | 10.705                  | Yes     |
| PEX5    | fqiMRwvUgOHnCXfl_0 | rs7969508  | 4.79                         | 4.59             | -0.096               | 1.76                     | 6.43                          | 0.2725                            | 10.151 | 0.272              | 9.374   | 9.97            | 10.179 | 10.348          | 10.705                  | Yes     |
| PEX6    | W1K11SrKc6T4hJJBj0 | rs6901007  | 8.26                         | 7.88             | 0.165                | 1.91                     | -38.91                        | 0.3825                            | 8.462  | 0.549              | 7.243   | 8.123           | 8.454  | 8.831           | 9.869                   |         |
| PEX6    | W1K11SrKc6T4hJJBj0 | rs2234185  | 13.08                        | 12.47            | -0.257               | 4.48                     | -34.67                        | 0.4425                            | 8.462  | 0.549              | 7.243   | 8.123           | 8.454  | 8.831           | 9.869                   |         |
| PEX6    | W1K11SrKc6T4hJJBj0 | rs4711731  | 9.2                          | 8.78             | 0.183                | 3.28                     | -34.03                        | 0.4175                            | 8.462  | 0.549              | 7.243   | 8.123           | 8.454  | 8.831           | 9.869                   |         |
| PEX6    | W1K11SrKc6T4hJJBj0 | rs4714634  | 19.41                        | 18.50            | -0.366               | 6.3                      | -30.63                        | 0.495                             | 8.462  | 0.549              | 7.243   | 8.123           | 8.454  | 8.831           | 9.869                   |         |
| PEX6    | W1K11SrKc6T4hJJBj0 | rs9471969  | 3.47                         | 3.32             | 0.066                | 2.06                     | -25.36                        | 0.3025                            | 8.462  | 0.549              | 7.243   | 8.123           | 8.454  | 8.831           | 9.869                   |         |
| PEX6    | W1K11SrKc6T4hJJBj0 | rs9462853  | 3.5                          | 3.35             | -0.067               | 1.06                     | -21.08                        | 0.309                             | 8.462  | 0.549              | 7.243   | 8.123           | 8.454  | 8.831           | 9.869                   |         |
| PEX6    | W1K11SrKc6T4hJJBj0 | rs6927188  | 3.93                         | 3.76             | 0.081                | 1.67                     | -19.16                        | 0.2888                            | 8.462  | 0.549              | 7.243   | 8.123           | 8.454  | 8.831           | 9.869                   |         |
| PEX6    | W1K11SrKc6T4hJJBj0 | rs6941212  | 24.61                        | 23.45            | -0.441               | 5.56                     | -15.83                        | 0.49                              | 8.462  | 0.549              | 7.243   | 8.123           | 8.454  | 8.831           | 9.869                   |         |
| PEX6    | W1K11SrKc6T4hJJBj0 | rs9462856  | 25.75                        | 24.53            | -0.451               | 4.89                     | -5.72                         | 0.41                              | 8.462  | 0.549              | 7.243   | 8.123           | 8.454  | 8.831           | 9.869                   |         |
| PEX6    | W1K11SrKc6T4hJJBj0 | rs1129187  | 24.61                        | 23.45            | 0.441                | 5.56                     | 0.45                          | 0.49                              | 8.462  | 0.549              | 7.243   | 8.123           | 8.454  | 8.831           | 9.869                   |         |
| PEX6    | W1K11SrKc6T4hJJBj0 | rs2274514  | 25.19                        | 24.00            | 0.45                 | 4.63                     | 2.75                          | 0.4116                            | 8.462  | 0.549              | 7.243   | 8.123           | 8.454  | 8.831           | 9.869                   |         |
| PEX6    | W1K11SrKc6T4hJJBj0 | rs2395943  | 28.2                         | 26.86            | 0.476                | 5.12                     | -6.21                         | 0.3725                            | 8.462  | 0.549              | 7.243   | 8.123           | 8.454  | 8.831           | 9.869                   |         |
| PEX7    | 9h9LFSJvHSunh736jg | rs2295592  | 4.5                          | 4.30             | -0.088               | 1.59                     | 22.93                         | 0.135                             | 8.145  | 0.153              | 7.793   | 8.04            | 8.142  | 8.25            | 8.592                   |         |
| PFAAP5  | WX3QVN1cFUTn5S9_Co | rs9595617  | 10.44                        | 9.96             | 0.198                | 4.25                     | -33.69                        | 0.39                              | 10.297 | 0.426              | 9.297   | 9.991           | 10.307 | 10.613          | 11.557                  |         |
| PFAAP5  | WX3QVN1cFUTn5S9_Co | rs9595630  | 10.44                        | 9.96             | -0.198               | 4.29                     | -25.59                        | 0.39                              | 10.297 | 0.426              | 9.297   | 9.991           | 10.307 | 10.613          | 11.557                  |         |
| PFAAP5  | WX3QVN1cFUTn5S9_Co | rs798266   | 8.66                         | 8.26             | -0.17                | 2.56                     | -17.34                        | 0.3543                            | 10.297 | 0.426              | 9.297   | 9.991           | 10.307 | 10.613          | 11.557                  |         |
| PFAAP5  | WX3QVN1cFUTn5S9_Co | rs7328733  | 10.18                        | 9.71             | 0.194                | 4.42                     | 13.82                         | 0.39                              | 10.297 | 0.426              | 9.297   | 9.991           | 10.307 | 10.613          | 11.557                  |         |
| PFAAP5  | WX3QVN1cFUTn5S9_Co | rs7332115  | 8.9                          | 8.49             | -0.171               | 4.26                     | 34.63                         | 0.4                               | 10.297 | 0.426              | 9.297   | 9.991           | 10.307 | 10.613          | 11.557                  |         |
| PFAAP5  | WX3QVN1cFUTn5S9_Co | rs208418   | 8.63                         | 8.24             | 0.17                 | 2.65                     | 41.1                          | 0.345                             | 10.297 | 0.426              | 9.297   | 9.991           | 10.307 | 10.613          | 11.557                  |         |
| PFAS    | cne.eMiuuqndNX11wU | rs2270445  | 3.31                         | 3.17             | -0.061               | 0.24                     | 45.67                         | 0.4264                            | 8.722  | 0.259              | 8.083   | 8.549           | 8.705  | 8.902           | 9.396                   |         |
| PFKFB2  | cqeJF3q_DqDq0j6glw | rs10864035 | 4.93                         | 4.71             | -0.091               | 4.22                     | -18.29                        | 0.39                              | 7.841  | 0.266              | 7.218   | 7.662           | 7.812  | 8.025           | 8.624                   |         |
| PFKFB2  | cqeJF3q_DqDq0j6glw | rs2075863  | 4.61                         | 4.41             | 0.085                | 4.09                     | 9.33                          | 0.395                             | 7.841  | 0.266              | 7.218   | 7.662           | 7.812  | 8.025           | 8.624                   |         |
| PFKP    | 6zhu2hOpSegTuSV6Ls | rs17212411 | 3.41                         | 3.27             | 0.061                | 1.81                     | -9.31                         | 0.07                              | 10.303 | 0.414              | 9.402   | 9.987           | 10.31  | 10.603          | 11.556                  | Yes     |
| PFKP    | 6zhu2hOpSegTuSV6Ls | rs12268267 | 4.14                         | 3.96             | 0.08                 | 0.84                     | -13.68                        | 0.165                             | 10.303 | 0.414              | 9.402   | 9.987           | 10.31  | 10.603          | 11.556                  | Yes     |
| PFN2    | BkFXVOF8SwUx4_DVSo | rs2168753  | 5.22                         | 4.99             | -0.099               | 0.76                     | 5.18                          | 0.4025                            | 7.985  | 0.269              | 7.168   | 7.826           | 7.964  | 8.158           | 8.721                   |         |
| PFN2    | BkFXVOF8SwUx4_DVSo | rs9637407  | 5.27                         | 5.04             | -0.102               | 0.64                     | 9.69                          | 0.4061                            | 7.985  | 0.269              | 7.168   | 7.826           | 7.964  | 8.158           | 8.721                   |         |
| PFN2    | BkFXVOF8SwUx4_DVSo | rs1457547  | 4.73                         | 4.53             | -0.088               | 2.22                     | 35.92                         | 0.135                             | 7.985  | 0.269              | 7.168   | 7.826           | 7.964  | 8.158           | 8.721                   |         |
| PFN2    | BkFXVOF8SwUx4_DVSo | rs12635847 | 4.78                         | 4.57             | -0.091               | 0.69                     | 44.82                         | 0.4091                            | 7.985  | 0.269              | 7.168   | 7.826           | 7.964  | 8.158           | 8.721                   |         |
| PGCP    | c6S4ApSpTToorzXnk  | rs2704253  | 3.95                         | 3.78             | 0.073                | 2.76                     | -6.14                         | 0.13                              | 8.26   | 0.253              | 7.207   | 8.112           | 8.247  | 8.381           | 9.557                   |         |
| PHACS   | 92eyS6gHXwnuvSXqV0 | rs10838223 | 5.87                         | 5.61             | 0.115                | 1.89                     | -32.36                        | 0.22                              | 9.673  | 0.658              | 8.099   | 9.187           | 9.533  | 10.159          | 11.472                  |         |
| PHACS   | 92eyS6gHXwnuvSXqV0 | rs4237645  | 6.17                         | 5.90             | -0.122               | 2.13                     | -12.14                        | 0.3593                            | 9.673  | 0.658              | 8.099   | 9.187           | 9.533  | 10.159          | 11.472                  |         |
| PHACS   | 92eyS6gHXwnuvSXqV0 | rs2074051  | 4.46                         | 4.27             | -0.086               | 1.93                     | -7.65                         | 0.2273                            | 9.673  | 0.658              | 8.099   | 9.187           | 9.533  | 10.159          | 11.472                  |         |
| PHACS   | 92eyS6gHXwnuvSXqV0 | rs178501   | 11.75                        | 11.20            | -0.23                | 4.85                     | -6.14                         | 0.445                             | 9.673  | 0.658              | 8.099   | 9.187           | 9.533  | 10.159          | 11.472                  |         |
| PHACS   | 92eyS6gHXwnuvSXqV0 | rs178503   | 8.32                         | 7.94             | -0.168               | 2.99                     | -4.93                         | 0.4874                            | 9.673  | 0.658              | 8.099   | 9.187           | 9.533  | 10.159          | 11.472                  |         |
| PHACS   | 92eyS6gHXwnuvSXqV0 | rs178505   | 12.04                        | 11.49            | 0.235                | 5.03                     | -3.01                         | 0.4425                            | 9.673  | 0.658              | 8.099   | 9.187           | 9.533  | 10.159          | 11.472                  |         |
| PHACS   | 92eyS6gHXwnuvSXqV0 | rs7127924  | 19.41                        | 18.49            | -0.352               | 5.58                     | -2.17                         | 0.185                             | 9.673  | 0.658              | 8.099   | 9.187           | 9.533  | 10.159          | 11.472                  |         |
| PHACS   | 92eyS6gHXwnuvSXqV0 | rs178514   | 4.06                         | 3.88             | -0.078               | 1.67                     | 1.3                           | 0.2025                            | 9.673  | 0.658              | 8.099   | 9.187           | 9.533  | 10.159          | 11.472                  |         |
| PHACS   | 92eyS6gHXwnuvSXqV0 | rs7951555  | 21.31                        | 20.31            | 0.393                | 5.89                     | 3.54                          | 0.1734                            | 9.673  | 0.658              | 8.099   | 9.187           | 9.533  | 10.159          | 11.472                  |         |
| PHACS   | 92eyS6gHXwnuvSXqV0 | rs178519   | 3.83                         | 3.67             | -0.072               | 1.54                     | 5.44                          | 0.2525                            | 9.673  | 0.658              | 8.099   | 9.187           | 9.533  | 10.159          | 11.472                  |         |
| PHACS   | 92eyS6gHXwnuvSXqV0 | rs7935243  | 4.62                         | 4.42             | 0.095                | 2.92                     | 6.56                          | 0.34                              | 9.673  | 0.658              | 8.099   | 9.187           | 9.533  | 10.159          | 11.472                  |         |
| PHACS   | 92eyS6gHXwnuvSXqV0 | rs178525   | 5.4                          | 5.16             | -0.106               | 3.29                     | -5.71                         | 0.29                              | 9.673  | 0.658              | 8.099   | 9.187           | 9.533  | 10.159          | 11.472                  |         |
| PHACS   | 92eyS6gHXwnuvSXqV0 | rs3134909  | 12.63                        | 12.05            | 0.244                | 4.7                      | -2.39                         | 0.3025                            | 9.673  | 0.658              | 8.099   | 9.187           | 9.533  | 10.159          | 11.472                  |         |
| PHACS   | 92eyS6gHXwnuvSXqV0 | rs3107275  | 5.17                         | 4.94             | 0.105                | 2.81                     | -0.59                         | 0.425                             | 9.673  | 0.658              | 8.099   | 9.187           | 9.533  | 10.159          | 11.472                  |         |
| PHACS   | 92eyS6gHXwnuvSXqV0 | rs2285029  | 5.17                         | 4.94             | 0.102                | 3.23                     | 0.3                           | 0.2925                            | 9.673  | 0.658              | 8.099   | 9.187           | 9.533  | 10.159          | 11.472                  |         |
| PHACS   | 92eyS6gHXwnuvSXqV0 | rs11037858 | 8.25                         | 7.87             | -0.175               | 3.53                     | 5.12                          | 0.25                              | 9.673  | 0.658              | 8.099   | 9.187           | 9.533  | 10.159          | 11.472                  |         |
| PHACS   | 92eyS6gHXwnuvSXqV0 | rs7111879  | 3.45                         | 3.31             | -0.068               | 1.53                     | 28.57                         | 0.44                              | 9.673  | 0.658              | 8.099   | 9.187           | 9.533  | 10.159          | 11.472                  |         |
| PHACTR4 | 9XicfvZfe5tFCw3r00 | rs7518232  | 3.67                         | 3.52             | -0.071               | 2.82                     | -25.38                        | 0.3175                            | 9.975  | 0.294              | 8.271   | 9.775           | 10.01  | 10.187          | 10.655                  |         |
| PHACTR4 | 9XicfvZfe5tFCw3r00 | rs7518249  | 3.67                         | 3.52             | -0.071               | 2.86                     | -25.34                        | 0.3175                            | 9.975  | 0.294              | 8.271   | 9.775           | 10.01  | 10.187          | 10.655                  |         |
| PHACTR4 | 9XicfvZfe5tFCw3r00 | rs11247814 | 3.67                         | 3.52             | 0.071                | 2.86                     | -22.36                        | 0.3175                            | 9.975  | 0.294              | 8.271   | 9.775           | 10.01  | 10.187          | 10.655                  |         |
| PHACTR4 | 9XicfvZfe5tFCw3r00 | rs10915206 | 3.62                         | 3.47             | -0.069               | 2.07                     | 21.77                         | 0.27                              | 9.975  | 0.294              | 8.271   | 9.775           | 10.01  | 10.187          | 10.655                  |         |
| PHACTR4 | 9XicfvZfe5tFCw3r00 | rs9426403  | 4.6                          | 4.40             | 0.09                 | 2.58                     | 40.82                         | 0.3025                            | 9.975  | 0.294              | 8.271   | 9.775           | 10.01  | 10.187          | 10.655                  |         |
| PHF11   | ftct136XSSd9XvHr4  | rs8000149  | 3.7                          | 3.55             | 0.069                | 1.18                     | -13.09                        | 0.32                              | 12.046 | 0.257              | 11.077  | 11.89           | 12.053 | 12.216          | 13.245                  |         |
| PHF11   | ftct136XSSd9XvHr4  | rs7329078  | 3.68                         | 3.53             | -0.068               | 1.49                     | -10.63                        | 0.3492                            | 12.046 | 0.257              | 11.077  | 11.89           | 12.053 | 12.216          | 13.245                  |         |
| PHF11   | ftct136XSSd9XvHr4  | rs9526569  | 3.63                         | 3.48             | 0.067                | 1.49                     | -0.89                         | 0.3426                            | 12.046 | 0.257              | 11.077  | 11.89           | 12.053 | 12.216          | 13.245                  |         |
| PHF14   | BxX04hUHeUSdNdpDU  | rs7790568  | 3.41                         | 3.26             | -0.065               | 1.74                     | -2.9                          | 0.1025                            | 7.196  | 0.045              | 7.111   | 7.167           | 7.192  | 7.218           | 7.419                   |         |
| PHF19   | II103moLul6vFFJLIE | rs1953126  | 4.04                         | 3.87             | -0.078               | 0.61                     | 0.89                          | 0.3475                            | 8.17   | 0.375              | 7.338   | 7.886           | 8.212  | 8.442           | 9.074                   |         |
| PHF19   | II103moLul6vFFJLIE | rs10985073 | 3.45                         | 3.31             | -0.067               | 0.83                     | 4.25                          | 0.4523                            | 8.17   | 0.375              | 7.338   | 7.886           | 8.212  | 8.442           | 9.074                   |         |
| PHF19   | II103moLul6vFFJLIE | rs881375   | 4.44                         | 4.25             | -0.086               | 0.79                     | 13.29                         | 0.35                              | 8.17   | 0.375              | 7.338   | 7.886           | 8.212  | 8.442           | 9.074                   |         |
| PHGDH   | WUT36ngZqXeEefEeR0 | rs942835   | 4.07                         | 3.90             | -0.078               | 2.01                     | 8.51                          | 0.1525                            | 8.802  | 0.417              | 7.643   | 8.535           | 8.806  | 9.087           | 9.882                   |         |
| PHGDH   | WUT36ngZqXeEefEeR0 | rs591162   | 3.35                         | 3.21             | 0.063                | 0.95                     | 0.99                          | 0.3025                            | 8.802  | 0.417              | 7.643   | 8.535           | 8.806  | 9.087           | 9.882                   |         |



| Symbol   | Lumi nuID          | SNP        | Population-based | Population-based          | % Variance | Family-based     | Distance from   | MAF    | Mean      | Transcript abundance (log2 scale) |            |            |            |         | SNP mapping under probe |         |
|----------|--------------------|------------|------------------|---------------------------|------------|------------------|-----------------|--------|-----------|-----------------------------------|------------|------------|------------|---------|-------------------------|---------|
|          |                    |            | association      | association               |            | association      |                 |        |           | Standard                          | Minimum    | 25th       | Median     | 75th    |                         | Maximum |
|          |                    |            | p-value (-log10) | p-value (-log10), GC adj. | Explained  | p-value (-log10) | transcript (kb) |        | Deviation |                                   | percentile | percentile | percentile | Maximum |                         |         |
| PHGDH    | WUT36ngZqXeEeffeR0 | rs522277   | 3.46             | 3.31                      | -0.066     | 0.95             | 1.5             | 0.305  | 8.802     | 0.417                             | 7.643      | 8.535      | 8.806      | 9.087   | 9.882                   |         |
| *HOSPHO2 | oiS4TT5f0dSo66B30E | rs7575494  | 21.98            | 20.94                     | -0.391     | 3.74             | -33.38          | 0.3175 | 7.755     | 0.239                             | 7.153      | 7.618      | 7.768      | 7.894   | 8.483                   |         |
| *HOSPHO2 | oiS4TT5f0dSo66B30E | rs6733165  | 6.17             | 5.89                      | -0.121     | 1.47             | -31.5           | 0.355  | 7.755     | 0.239                             | 7.153      | 7.618      | 7.768      | 7.894   | 8.483                   |         |
| *HOSPHO2 | oiS4TT5f0dSo66B30E | rs6705785  | 10.04            | 9.58                      | 0.196      | 1.94             | -22.48          | 0.4823 | 7.755     | 0.239                             | 7.153      | 7.618      | 7.768      | 7.894   | 8.483                   |         |
| *HOSPHO2 | oiS4TT5f0dSo66B30E | rs7421737  | 10.16            | 9.69                      | 0.194      | 1.48             | -12.56          | 0.4825 | 7.755     | 0.239                             | 7.153      | 7.618      | 7.768      | 7.894   | 8.483                   |         |
| *HOSPHO2 | oiS4TT5f0dSo66B30E | rs2930     | 10.16            | 9.69                      | 0.194      | 1.5              | -10.12          | 0.4825 | 7.755     | 0.239                             | 7.153      | 7.618      | 7.768      | 7.894   | 8.483                   |         |
| *HOSPHO2 | oiS4TT5f0dSo66B30E | rs6433138  | 9.6              | 9.17                      | 0.186      | 1.51             | 25.98           | 0.1859 | 7.755     | 0.239                             | 7.153      | 7.618      | 7.768      | 7.894   | 8.483                   |         |
| *HOSPHO2 | oiS4TT5f0dSo66B30E | rs2288331  | 3.66             | 3.51                      | 0.069      | 1.32             | 34.49           | 0.1875 | 7.755     | 0.239                             | 7.153      | 7.618      | 7.768      | 7.894   | 8.483                   |         |
| *HOSPHO2 | oiS4TT5f0dSo66B30E | rs6745705  | 8.16             | 7.79                      | 0.157      | 0.87             | 45.36           | 0.1825 | 7.755     | 0.239                             | 7.153      | 7.618      | 7.768      | 7.894   | 8.483                   |         |
| *HOSPHO2 | oiS4TT5f0dSo66B30E | rs1344639  | 5.44             | 5.20                      | -0.104     | 0.16             | 49.53           | 0.385  | 7.755     | 0.239                             | 7.153      | 7.618      | 7.768      | 7.894   | 8.483                   |         |
| PHTF1    | K4Ou.WiiQtt9QeruTk | rs3827733  | 4.72             | 4.52                      | 0.093      | 2.91             | 37.23           | 0.1834 | 7.975     | 0.179                             | 7.374      | 7.866      | 7.982      | 8.081   | 8.528                   |         |
| PI16     | uEk7md1eLl7snqjq0  | rs1405069  | 3.53             | 3.38                      | 0.06       | 0.62             | 0.48            | 0.4425 | 9.061     | 0.553                             | 7.679      | 8.669      | 9.066      | 9.429   | 10.455                  |         |
| PI16     | uEk7md1eLl7snqjq0  | rs9357232  | 10.78            | 10.29                     | -0.19      | 3.87             | -4.15           | 0.145  | 9.061     | 0.553                             | 7.679      | 8.669      | 9.066      | 9.429   | 10.455                  |         |
| PI16     | uEk7md1eLl7snqjq0  | rs7755143  | 11.28            | 10.77                     | 0.201      | 3.5              | 0.56            | 0.1475 | 9.061     | 0.553                             | 7.679      | 8.669      | 9.066      | 9.429   | 10.455                  |         |
| PI16     | uEk7md1eLl7snqjq0  | rs6918432  | 4.13             | 3.95                      | -0.071     | 0.95             | 7.66            | 0.255  | 9.061     | 0.553                             | 7.679      | 8.669      | 9.066      | 9.429   | 10.455                  |         |
| PI16     | uEk7md1eLl7snqjq0  | rs748408   | 5.31             | 5.07                      | 0.094      | 1.42             | 10.13           | 0.2025 | 9.061     | 0.553                             | 7.679      | 8.669      | 9.066      | 9.429   | 10.455                  |         |
| PI16     | uEk7md1eLl7snqjq0  | rs6909984  | 5.22             | 4.99                      | -0.092     | 1.44             | 11.3            | 0.2035 | 9.061     | 0.553                             | 7.679      | 8.669      | 9.066      | 9.429   | 10.455                  |         |
| PI16     | uEk7md1eLl7snqjq0  | rs3778022  | 10.78            | 10.29                     | 0.192      | 3.22             | 15.63           | 0.1275 | 9.061     | 0.553                             | 7.679      | 8.669      | 9.066      | 9.429   | 10.455                  |         |
| PI16     | uEk7md1eLl7snqjq0  | rs3778021  | 3.72             | 3.56                      | 0.065      | 1.36             | 16.19           | 0.3575 | 9.061     | 0.553                             | 7.679      | 8.669      | 9.066      | 9.429   | 10.455                  |         |
| PI16     | uEk7md1eLl7snqjq0  | rs2293390  | 3.34             | 3.20                      | 0.058      | 0.33             | 16.91           | 0.405  | 9.061     | 0.553                             | 7.679      | 8.669      | 9.066      | 9.429   | 10.455                  |         |
| PI16     | uEk7md1eLl7snqjq0  | rs726819   | 3.4              | 3.26                      | -0.058     | 0.95             | 18.6            | 0.16   | 9.061     | 0.553                             | 7.679      | 8.669      | 9.066      | 9.429   | 10.455                  |         |
| PI16     | uEk7md1eLl7snqjq0  | rs16868759 | 3.48             | 3.33                      | 0.06       | 1                | 22.91           | 0.1625 | 9.061     | 0.553                             | 7.679      | 8.669      | 9.066      | 9.429   | 10.455                  |         |
| PI16     | uEk7md1eLl7snqjq0  | rs6930271  | 4.29             | 4.11                      | 0.074      | 1.24             | 32.49           | 0.1625 | 9.061     | 0.553                             | 7.679      | 8.669      | 9.066      | 9.429   | 10.455                  |         |
| PIGB     | Z5UfVOI.dS5WUheHoA | rs12902710 | 4.22             | 4.04                      | -0.081     | 1.33             | -0.07           | 0.375  | 9.263     | 0.241                             | 8.528      | 9.113      | 9.272      | 9.443   | 9.793                   | Yes     |
| PIGB     | Z5UfVOI.dS5WUheHoA | rs12050587 | 3.35             | 3.21                      | 0.062      | 1.59             | 16.33           | 0.29   | 9.263     | 0.241                             | 8.528      | 9.113      | 9.272      | 9.443   | 9.793                   | Yes     |
| PIGB     | Z5UfVOI.dS5WUheHoA | rs678892   | 3.5              | 3.36                      | 0.066      | 1.1              | -14.99          | 0.3775 | 9.263     | 0.241                             | 8.528      | 9.113      | 9.272      | 9.443   | 9.793                   | Yes     |
| PIGL     | Ed5AKIVOyIkP7UB1J8 | rs178831   | 4.08             | 3.90                      | -0.078     | 0.96             | -39.69          | 0.3442 | 7.56      | 0.218                             | 7.129      | 7.398      | 7.526      | 7.698   | 8.573                   |         |
| PIGL     | Ed5AKIVOyIkP7UB1J8 | rs178810   | 4.34             | 4.15                      | -0.083     | 1.03             | -23.11          | 0.3492 | 7.56      | 0.218                             | 7.129      | 7.398      | 7.526      | 7.698   | 8.573                   |         |
| PIGL     | Ed5AKIVOyIkP7UB1J8 | rs178798   | 5.92             | 5.66                      | 0.115      | 1.89             | -3.18           | 0.405  | 7.56      | 0.218                             | 7.129      | 7.398      | 7.526      | 7.698   | 8.573                   |         |
| PIGL     | Ed5AKIVOyIkP7UB1J8 | rs178791   | 5.77             | 5.51                      | -0.112     | 2.16             | 6.67            | 0.41   | 7.56      | 0.218                             | 7.129      | 7.398      | 7.526      | 7.698   | 8.573                   |         |
| PIGL     | Ed5AKIVOyIkP7UB1J8 | rs7210224  | 6.06             | 5.80                      | 0.119      | 1.89             | 27.29           | 0.2766 | 7.56      | 0.218                             | 7.129      | 7.398      | 7.526      | 7.698   | 8.573                   |         |
| PIGL     | Ed5AKIVOyIkP7UB1J8 | rs2109262  | 9.36             | 8.93                      | 0.182      | 1.6              | -44.94          | 0.46   | 7.56      | 0.218                             | 7.129      | 7.398      | 7.526      | 7.698   | 8.573                   |         |
| PIGL     | Ed5AKIVOyIkP7UB1J8 | rs3112511  | 6.71             | 6.41                      | -0.131     | 1.35             | -22.05          | 0.3975 | 7.56      | 0.218                             | 7.129      | 7.398      | 7.526      | 7.698   | 8.573                   |         |
| PIGL     | Ed5AKIVOyIkP7UB1J8 | rs9944524  | 9.35             | 8.93                      | -0.182     | 1.89             | -16.92          | 0.4575 | 7.56      | 0.218                             | 7.129      | 7.398      | 7.526      | 7.698   | 8.573                   |         |
| PIGL     | Ed5AKIVOyIkP7UB1J8 | rs9890539  | 8.36             | 7.99                      | 0.164      | 1.79             | -8.25           | 0.4121 | 7.56      | 0.218                             | 7.129      | 7.398      | 7.526      | 7.698   | 8.573                   |         |
| PIGL     | Ed5AKIVOyIkP7UB1J8 | rs1476810  | 8.52             | 8.13                      | -0.165     | 1.55             | 3.65            | 0.465  | 7.56      | 0.218                             | 7.129      | 7.398      | 7.526      | 7.698   | 8.573                   |         |
| PIGL     | Ed5AKIVOyIkP7UB1J8 | rs7477     | 4.47             | 4.28                      | -0.084     | 1.34             | 16.45           | 0.465  | 7.56      | 0.218                             | 7.129      | 7.398      | 7.526      | 7.698   | 8.573                   |         |
| PIGN     | 6uu5yff6eOcj.XrOZU | rs565610   | 7.26             | 6.94                      | 0.144      | 3.91             | -13.86          | 0.09   | 8.702     | 0.246                             | 7.974      | 8.539      | 8.71       | 8.866   | 9.321                   |         |
| PIGN     | 6uu5yff6eOcj.XrOZU | rs9636100  | 4.67             | 4.46                      | -0.09      | 1.66             | -0.15           | 0.4125 | 8.702     | 0.246                             | 7.974      | 8.539      | 8.71       | 8.866   | 9.321                   |         |
| PIGN     | 6uu5yff6eOcj.XrOZU | rs1573402  | 9.04             | 8.63                      | 0.178      | 3.83             | 39.73           | 0.09   | 8.702     | 0.246                             | 7.974      | 8.539      | 8.71       | 8.866   | 9.321                   |         |
| PIGN     | 6uu5yff6eOcj.XrOZU | rs4941107  | 7.94             | 7.58                      | -0.16      | 2.96             | 39.87           | 0.385  | 8.702     | 0.246                             | 7.974      | 8.539      | 8.71       | 8.866   | 9.321                   |         |
| PIGN     | 6uu5yff6eOcj.XrOZU | rs17715613 | 7.95             | 7.59                      | -0.16      | 3.07             | -33.92          | 0.3825 | 8.702     | 0.246                             | 7.974      | 8.539      | 8.71       | 8.866   | 9.321                   |         |
| PIGN     | 6uu5yff6eOcj.XrOZU | rs4941117  | 5.43             | 5.19                      | -0.106     | 3.63             | -17.82          | 0.3875 | 8.702     | 0.246                             | 7.974      | 8.539      | 8.71       | 8.866   | 9.321                   |         |
| PIGN     | 6uu5yff6eOcj.XrOZU | rs7235710  | 8                | 7.64                      | 0.16       | 3.23             | -2.12           | 0.3875 | 8.702     | 0.246                             | 7.974      | 8.539      | 8.71       | 8.866   | 9.321                   |         |
| PIGN     | 6uu5yff6eOcj.XrOZU | rs1587999  | 5.68             | 5.43                      | -0.112     | 1.13             | 22.27           | 0.0575 | 8.702     | 0.246                             | 7.974      | 8.539      | 8.71       | 8.866   | 9.321                   |         |
| PIGN     | 6uu5yff6eOcj.XrOZU | rs12150701 | 3.44             | 3.30                      | -0.067     | 0.29             | 27.43           | 0.285  | 8.702     | 0.246                             | 7.974      | 8.539      | 8.71       | 8.866   | 9.321                   |         |
| PILRB    | cteloKPKQqMAKRcKV8 | rs6955367  | 46.52            | 44.28                     | 0.673      | 5.35             | -4.26           | 0.1725 | 7.268     | 0.231                             | 7.1        | 7.123      | 7.154      | 7.354   | 8.315                   |         |
| PILRB    | cteloKPKQqMAKRcKV8 | rs5015756  | 3.63             | 3.48                      | -0.066     | 1.85             | 48.01           | 0.4375 | 7.268     | 0.231                             | 7.1        | 7.123      | 7.154      | 7.354   | 8.315                   |         |
| PINK1    | HRigdv4KqSbJ03_UU  | rs3738133  | 3.92             | 3.76                      | -0.074     | 0.9              | 5.49            | 0.2575 | 8.425     | 0.184                             | 7.995      | 8.299      | 8.417      | 8.515   | 9.509                   |         |
| PINK1    | HRigdv4KqSbJ03_UU  | rs1043424  | 3.91             | 3.74                      | 0.074      | 0.9              | -1              | 0.26   | 8.425     | 0.184                             | 7.995      | 8.299      | 8.417      | 8.515   | 9.509                   |         |
| PITRM1   | 912hWIFYA_UKFTXo00 | rs1053000  | 4.41             | 4.22                      | 0.089      | 0.43             | -1.04           | 0.2854 | 9.017     | 0.309                             | 8.258      | 8.818      | 9.034      | 9.203   | 9.932                   |         |
| PITRM1   | 912hWIFYA_UKFTXo00 | rs2279216  | 4.2              | 4.02                      | -0.083     | 0.29             | 1.03            | 0.28   | 9.017     | 0.309                             | 8.258      | 8.818      | 9.034      | 9.203   | 9.932                   |         |
| PITRM1   | 912hWIFYA_UKFTXo00 | rs2291103  | 3.95             | 3.78                      | -0.078     | 0.2              | 10.88           | 0.255  | 9.017     | 0.309                             | 8.258      | 8.818      | 9.034      | 9.203   | 9.932                   |         |
| PITRM1   | 912hWIFYA_UKFTXo00 | rs3765099  | 3.71             | 3.55                      | -0.072     | 0.27             | -17.41          | 0.26   | 9.017     | 0.309                             | 8.258      | 8.818      | 9.034      | 9.203   | 9.932                   |         |
| PKD2L1   | WikdWiQLc4KN95CKeU | rs2278842  | 3.32             | 3.18                      | 0.061      | 1.1              | 8.84            | 0.1375 | 7.129     | 0.047                             | 7.096      | 7.109      | 7.117      | 7.129   | 7.545                   |         |
| PKD2L1   | WikdWiQLc4KN95CKeU | rs12781019 | 3.32             | 3.18                      | -0.061     | 1.1              | 9.66            | 0.1375 | 7.129     | 0.047                             | 7.096      | 7.109      | 7.117      | 7.129   | 7.545                   |         |
| PKIA     | EXh.eJXr9VAguP3jl  | rs7837755  | 3.86             | 3.70                      | 0.076      | 0.47             | 19.08           | 0.1175 | 7.347     | 0.163                             | 7.105      | 7.211      | 7.327      | 7.452   | 7.89                    |         |
| PKIA     | EXh.eJXr9VAguP3jl  | rs7007627  | 4.05             | 3.88                      | -0.08      | 0.71             | 27.66           | 0.1575 | 7.347     | 0.163                             | 7.105      | 7.211      | 7.327      | 7.452   | 7.89                    |         |
| PKIA     | EXh.eJXr9VAguP3jl  | rs967426   | 3.33             | 3.19                      | -0.063     | 1.69             | -17.59          | 0.3157 | 7.347     | 0.163                             | 7.105      | 7.211      | 7.327      | 7.452   | 7.89                    |         |
| PKIA     | EXh.eJXr9VAguP3jl  | rs1062248  | 3.55             | 3.40                      | -0.068     | 0.53             | 1.27            | 0.1508 | 7.347     | 0.163                             | 7.105      | 7.211      | 7.327      | 7.452   | 7.89                    |         |
| PLA2G1B  | menaQ0XskkAECLuKU  | rs2070873  | 4.15             | 3.97                      | -0.084     | 2.27             | -2.15           | 0.1325 | 7.148     | 0.029                             | 7.107      | 7.128      | 7.143      | 7.161   | 7.274                   |         |
| PLA2G4C  | E5fUedfzh5H3JSyd5E | rs1653554  | 10.6             | 10.11                     | 0.209      | 3.05             | -5.54           | 0.18   | 7.438     | 0.341                             | 7.111      | 7.203      | 7.325      | 7.491   | 8.81                    |         |

| Symbol  | Lumi nuID           | SNP        | Population-based             | Population-based                     | % Variance Explained | Family-based                 | Distance from transcript (kb) | MAF    | Transcript abundance (log2 scale) |                    |         |                 |        | SNP mapping under probe |                 |         |
|---------|---------------------|------------|------------------------------|--------------------------------------|----------------------|------------------------------|-------------------------------|--------|-----------------------------------|--------------------|---------|-----------------|--------|-------------------------|-----------------|---------|
|         |                     |            | association p-value (-log10) | association p-value (-log10), GC aad |                      | association p-value (-log10) |                               |        | Mean                              | Standard Deviation | Minimum | 25th percentile | Median |                         | 75th percentile | Maximum |
| PLA2G4C | E5fUedfzh5H3J5yd5E  | rs251693   | 4.05                         | 3.88                                 | 0.076                | 4.53                         | 1.42                          | 0.4425 | 7.438                             | 0.341              | 7.111   | 7.203           | 7.325  | 7.491                   | 8.81            |         |
| PLA2G4C | E5fUedfzh5H3J5yd5E  | rs2304136  | 12.44                        | 11.87                                | -0.24                | 1.54                         | 29.11                         | 0.0575 | 7.438                             | 0.341              | 7.111   | 7.203           | 7.325  | 7.491                   | 8.81            |         |
| PLA2G4C | E5fUedfzh5H3J5yd5E  | rs3730913  | 10.12                        | 9.66                                 | -0.201               | 2.49                         | 38.79                         | 0.1734 | 7.438                             | 0.341              | 7.111   | 7.203           | 7.325  | 7.491                   | 8.81            |         |
| PLCB2   | uoGop4DoAnI_1efp4s  | rs2277562  | 3.94                         | 3.77                                 | 0.076                | 2.73                         | -36.96                        | 0.1825 | 10.36                             | 0.648              | 8.945   | 9.843           | 10.393 | 10.844                  | 12.234          |         |
| PLD1    | QqkqH0ez.vTLs1UiXo  | rs6794454  | 4.12                         | 3.94                                 | -0.079               | 1.72                         | -0.68                         | 0.1575 | 7.282                             | 0.145              | 7.098   | 7.185           | 7.25   | 7.325                   | 7.953           |         |
| PLD1    | QqkqH0ez.vTLs1UiXo  | rs11708205 | 4.12                         | 3.94                                 | -0.079               | 1.72                         | 15.49                         | 0.1575 | 7.282                             | 0.145              | 7.098   | 7.185           | 7.25   | 7.325                   | 7.953           |         |
| PLD2    | H3lUpXHFT71fXflfg   | rs2286670  | 3.41                         | 3.27                                 | 0.063                | 0.19                         | 7.6                           | 0.1332 | 7.615                             | 0.189              | 7.236   | 7.499           | 7.583  | 7.696                   | 8.487           |         |
| PLEK    | 6ldXQ9V7BPXgnvVHVI  | rs7595717  | 4.99                         | 4.77                                 | 0.092                | 2.51                         | -4.95                         | 0.2475 | 10.03                             | 0.932              | 7.881   | 9.311           | 9.924  | 10.832                  | 12.079          |         |
| PLEK    | 6ldXQ9V7BPXgnvVHVI  | rs960221   | 4.11                         | 3.93                                 | -0.075               | 3.95                         | 0.72                          | 0.37   | 10.03                             | 0.932              | 7.881   | 9.311           | 9.924  | 10.832                  | 12.079          |         |
| PLEK    | 6ldXQ9V7BPXgnvVHVI  | rs17035378 | 3.47                         | 3.32                                 | -0.061               | 1.67                         | 6.53                          | 0.2675 | 10.03                             | 0.932              | 7.881   | 9.311           | 9.924  | 10.832                  | 12.079          |         |
| PLEK    | 6ldXQ9V7BPXgnvVHVI  | rs3816281  | 5.12                         | 4.90                                 | 0.094                | 2.89                         | 15.52                         | 0.2375 | 10.03                             | 0.932              | 7.881   | 9.311           | 9.924  | 10.832                  | 12.079          |         |
| PLEK    | 6ldXQ9V7BPXgnvVHVI  | rs10496164 | 5.12                         | 4.90                                 | 0.094                | 2.89                         | -14.46                        | 0.2375 | 10.03                             | 0.932              | 7.881   | 9.311           | 9.924  | 10.832                  | 12.079          |         |
| PLEKHA1 | QnfvYyTKAO964_Qq3U  | rs6585827  | 3.45                         | 3.30                                 | 0.065                | 2.72                         | -26.25                        | 0.4775 | 10.39                             | 0.657              | 7.671   | 9.981           | 10.362 | 10.844                  | 11.639          |         |
| PLEKHA1 | QnfvYyTKAO964_Qq3U  | rs2280141  | 3.49                         | 3.34                                 | 0.066                | 2.52                         | 1.31                          | 0.485  | 10.39                             | 0.657              | 7.671   | 9.981           | 10.362 | 10.844                  | 11.639          |         |
| PLEKHA4 | EDUn7DWWVAJpJQ2iZig | rs610308   | 3.5                          | 3.35                                 | -0.071               | 1.14                         | 5.46                          | 0.37   | 7.294                             | 0.14               | 7.111   | 7.206           | 7.259  | 7.35                    | 8.204           |         |
| PLEKHA5 | Qf3a0j5DJLx5RHxIt   | rs969235   | 7.51                         | 7.18                                 | 0.167                | 3.04                         | 32.59                         | 0.17   | 8.165                             | 0.294              | 7.136   | 7.98            | 8.169  | 8.356                   | 8.929           |         |
| PLEKHA5 | Qf3a0j5DJLx5RHxIt   | rs4764465  | 6.23                         | 5.95                                 | -0.13                | 2.23                         | 42.9                          | 0.1375 | 8.165                             | 0.294              | 7.136   | 7.98            | 8.169  | 8.356                   | 8.929           |         |
| PLEKHA5 | Qf3a0j5DJLx5RHxIt   | rs4561260  | 6.91                         | 6.60                                 | 0.152                | 2.56                         | 48.3                          | 0.13   | 8.165                             | 0.294              | 7.136   | 7.98            | 8.169  | 8.356                   | 8.929           |         |
| PLEKHA5 | Qf3a0j5DJLx5RHxIt   | rs10770448 | 5.64                         | 5.39                                 | -0.123               | 1.36                         | 61.49                         | 0.2423 | 8.165                             | 0.294              | 7.136   | 7.98            | 8.169  | 8.356                   | 8.929           |         |
| PLEKHA5 | Qf3a0j5DJLx5RHxIt   | rs2417772  | 5.44                         | 5.20                                 | 0.116                | 1.28                         | 67.47                         | 0.25   | 8.165                             | 0.294              | 7.136   | 7.98            | 8.169  | 8.356                   | 8.929           |         |
| PLEKHA5 | Qf3a0j5DJLx5RHxIt   | rs4550272  | 5.88                         | 5.62                                 | 0.124                | 2.42                         | 80.45                         | 0.1439 | 8.165                             | 0.294              | 7.136   | 7.98            | 8.169  | 8.356                   | 8.929           |         |
| PLEKHA5 | Qf3a0j5DJLx5RHxIt   | rs12817458 | 5.49                         | 5.25                                 | -0.112               | 1.35                         | -28.15                        | 0.0525 | 8.165                             | 0.294              | 7.136   | 7.98            | 8.169  | 8.356                   | 8.929           |         |
| PLEKHA5 | Qf3a0j5DJLx5RHxIt   | rs1344717  | 4.72                         | 4.51                                 | -0.092               | 1.72                         | -10.2                         | 0.085  | 8.165                             | 0.294              | 7.136   | 7.98            | 8.169  | 8.356                   | 8.929           |         |
| PLEKHA5 | Qf3a0j5DJLx5RHxIt   | rs751082   | 3.62                         | 3.46                                 | 0.07                 | 1.04                         | 2.66                          | 0.165  | 8.165                             | 0.294              | 7.136   | 7.98            | 8.169  | 8.356                   | 8.929           |         |
| PLEKHA7 | QSecnSEUCqwpUoT0zc  | rs11024102 | 3.74                         | 3.58                                 | 0.071                | 1.7                          | -27.35                        | 0.3075 | 7.385                             | 0.132              | 7.146   | 7.298           | 7.364  | 7.451                   | 8.222           |         |
| PLEKHA7 | QSecnSEUCqwpUoT0zc  | rs10734250 | 5.09                         | 4.87                                 | 0.098                | 1.74                         | -8.4                          | 0.35   | 7.385                             | 0.132              | 7.146   | 7.298           | 7.364  | 7.451                   | 8.222           |         |
| PLEKHA7 | QSecnSEUCqwpUoT0zc  | rs4757490  | 5.24                         | 5.01                                 | 0.101                | 1.35                         | -5.18                         | 0.3275 | 7.385                             | 0.132              | 7.146   | 7.298           | 7.364  | 7.451                   | 8.222           |         |
| PLEKHA9 | fitTqeg3jivs46eepI  | rs7303573  | 3.32                         | 3.18                                 | -0.059               | 2.57                         | -47.29                        | 0.385  | 9.329                             | 0.311              | 8.527   | 9.142           | 9.321  | 9.539                   | 10.217          |         |
| PLEKHH2 | ZdKSy.PTT_sJV1UR10  | rs10182489 | 3.35                         | 3.21                                 | 0.061                | 2.55                         | -34.91                        | 0.392  | 7.286                             | 0.113              | 7.118   | 7.212           | 7.271  | 7.33                    | 7.955           |         |
| PLEKHH2 | ZdKSy.PTT_sJV1UR10  | rs6710610  | 5.5                          | 5.26                                 | 0.104                | 2.51                         | -5.87                         | 0.395  | 7.286                             | 0.113              | 7.118   | 7.212           | 7.271  | 7.33                    | 7.955           |         |
| PLEKHH2 | ZdKSy.PTT_sJV1UR10  | rs13412979 | 4.09                         | 3.92                                 | -0.077               | 2.13                         | -5.36                         | 0.3945 | 7.286                             | 0.113              | 7.118   | 7.212           | 7.271  | 7.33                    | 7.955           |         |
| PLEKHH2 | ZdKSy.PTT_sJV1UR10  | rs12473033 | 9.68                         | 9.23                                 | 0.183                | 4.36                         | -1.56                         | 0.35   | 7.286                             | 0.113              | 7.118   | 7.212           | 7.271  | 7.33                    | 7.955           |         |
| PLEKHH2 | ZdKSy.PTT_sJV1UR10  | rs6750909  | 9.61                         | 9.17                                 | -0.182               | 4.55                         | 6.04                          | 0.345  | 7.286                             | 0.113              | 7.118   | 7.212           | 7.271  | 7.33                    | 7.955           |         |
| PLEKHH2 | ZdKSy.PTT_sJV1UR10  | rs7571775  | 7.94                         | 7.59                                 | 0.152                | 3.67                         | 10.84                         | 0.3875 | 7.286                             | 0.113              | 7.118   | 7.212           | 7.271  | 7.33                    | 7.955           |         |
| PLEKHH2 | ZdKSy.PTT_sJV1UR10  | rs7594100  | 4.73                         | 4.53                                 | 0.088                | 1.99                         | 16.71                         | 0.4275 | 7.286                             | 0.113              | 7.118   | 7.212           | 7.271  | 7.33                    | 7.955           |         |
| PLEKHH2 | ZdKSy.PTT_sJV1UR10  | rs3828297  | 6.27                         | 5.99                                 | -0.121               | 3.22                         | 38.62                         | 0.255  | 7.286                             | 0.113              | 7.118   | 7.212           | 7.271  | 7.33                    | 7.955           |         |
| PLRG1   | leieEOkU5N.qHogenE  | rs6825454  | 3.89                         | 3.73                                 | 0.075                | 2.48                         | 29.66                         | 0.2487 | 10.221                            | 0.32               | 7.335   | 10.094          | 10.266 | 10.421                  | 10.641          |         |
| PLS1    | ZUBPpyBNUIznhHte8k  | rs1403725  | 5.41                         | 5.17                                 | -0.106               | 1.85                         | 11.63                         | 0.0603 | 7.173                             | 0.056              | 7.102   | 7.134           | 7.155  | 7.197                   | 7.413           | Yes     |
| PLXDC1  | QedNlrm9dBdeRRdQIA  | rs7223157  | 3.49                         | 3.34                                 | -0.065               | 1.58                         | -17.07                        | 0.2125 | 8.53                              | 0.418              | 7.467   | 8.213           | 8.531  | 8.799                   | 10.311          |         |
| PLXDC1  | QedNlrm9dBdeRRdQIA  | rs13755    | 4                            | 3.83                                 | -0.076               | 1.13                         | 3.9                           | 0.4925 | 8.53                              | 0.418              | 7.467   | 8.213           | 8.531  | 8.799                   | 10.311          |         |
| PLXDC1  | QedNlrm9dBdeRRdQIA  | rs1882473  | 3.84                         | 3.68                                 | 0.072                | 1.68                         | 21.33                         | 0.2111 | 8.53                              | 0.418              | 7.467   | 8.213           | 8.531  | 8.799                   | 10.311          |         |
| PLXDC1  | QedNlrm9dBdeRRdQIA  | rs9896717  | 3.71                         | 3.55                                 | -0.069               | 1.11                         | 24.68                         | 0.295  | 8.53                              | 0.418              | 7.467   | 8.213           | 8.531  | 8.799                   | 10.311          |         |
| PM20D1  | KWE3k1fjUek.nld_1c  | rs947211   | 8.06                         | 7.70                                 | -0.159               | 2.9                          | -44.49                        | 0.235  | 7.221                             | 0.105              | 7.102   | 7.146           | 7.188  | 7.269                   | 7.703           |         |
| PM20D1  | TnnWUhbEtbVolQzxx4  | rs947211   | 4.45                         | 4.26                                 | -0.088               | 1.27                         | -44.49                        | 0.235  | 7.13                              | 0.034              | 7.096   | 7.113           | 7.12   | 7.136                   | 7.416           |         |
| PM20D1  | KWE3k1fjUek.nld_1c  | rs708727   | 18.12                        | 17.27                                | 0.335                | 7.89                         | -29.27                        | 0.4075 | 7.221                             | 0.105              | 7.102   | 7.146           | 7.188  | 7.269                   | 7.703           |         |
| PM20D1  | TnnWUhbEtbVolQzxx4  | rs708727   | 7.86                         | 7.51                                 | 0.158                | 4.11                         | -29.27                        | 0.4075 | 7.13                              | 0.034              | 7.096   | 7.113           | 7.12   | 7.136                   | 7.416           |         |
| PM20D1  | KWE3k1fjUek.nld_1c  | rs9438392  | 6.42                         | 6.13                                 | -0.126               | 4.34                         | -27.93                        | 0.185  | 7.221                             | 0.105              | 7.102   | 7.146           | 7.188  | 7.269                   | 7.703           |         |
| PM20D1  | KWE3k1fjUek.nld_1c  | rs1891092  | 4.67                         | 4.47                                 | 0.089                | 1.18                         | -11.65                        | 0.1075 | 7.221                             | 0.105              | 7.102   | 7.146           | 7.188  | 7.269                   | 7.703           |         |
| PM20D1  | TnnWUhbEtbVolQzxx4  | rs1891092  | 3.33                         | 3.19                                 | 0.063                | 0.38                         | -11.65                        | 0.1075 | 7.13                              | 0.034              | 7.096   | 7.113           | 7.12   | 7.136                   | 7.416           |         |
| PM20D1  | KWE3k1fjUek.nld_1c  | rs1891094  | 4.67                         | 4.47                                 | -0.089               | 1.18                         | -11.22                        | 0.1075 | 7.221                             | 0.105              | 7.102   | 7.146           | 7.188  | 7.269                   | 7.703           |         |
| PM20D1  | TnnWUhbEtbVolQzxx4  | rs1891094  | 3.33                         | 3.19                                 | -0.063               | 0.38                         | -11.22                        | 0.1075 | 7.13                              | 0.034              | 7.096   | 7.113           | 7.12   | 7.136                   | 7.416           |         |
| PM20D1  | KWE3k1fjUek.nld_1c  | rs823082   | 13.43                        | 12.81                                | 0.262                | 7.61                         | -10.22                        | 0.4875 | 7.221                             | 0.105              | 7.102   | 7.146           | 7.188  | 7.269                   | 7.703           |         |
| PM20D1  | TnnWUhbEtbVolQzxx4  | rs823082   | 5.93                         | 5.67                                 | 0.121                | 2.75                         | -10.22                        | 0.4875 | 7.13                              | 0.034              | 7.096   | 7.113           | 7.12   | 7.136                   | 7.416           |         |
| PM20D1  | KWE3k1fjUek.nld_1c  | rs823088   | 5.43                         | 5.19                                 | -0.107               | 5.47                         | -2.98                         | 0.38   | 7.221                             | 0.105              | 7.102   | 7.146           | 7.188  | 7.269                   | 7.703           |         |
| PM20D1  | KWE3k1fjUek.nld_1c  | rs13611754 | 13.43                        | 12.81                                | -0.262               | 7.61                         | 4.72                          | 0.4875 | 7.221                             | 0.105              | 7.102   | 7.146           | 7.188  | 7.269                   | 7.703           |         |
| PM20D1  | TnnWUhbEtbVolQzxx4  | rs1361754  | 5.93                         | 5.67                                 | -0.121               | 2.75                         | 4.72                          | 0.4875 | 7.13                              | 0.034              | 7.096   | 7.113           | 7.12   | 7.136                   | 7.416           |         |
| PM20D1  | KWE3k1fjUek.nld_1c  | rs954206   | 3.81                         | 3.65                                 | 0.074                | 3.58                         | 10.35                         | 0.3175 | 7.221                             | 0.105              | 7.102   | 7.146           | 7.188  | 7.269                   | 7.703           |         |
| PM20D1  | KWE3k1fjUek.nld_1c  | rs6702688  | 3.85                         | 3.69                                 | 0.073                | 3.32                         | 1.91                          | 0.4725 | 7.221                             | 0.105              | 7.102   | 7.146           | 7.188  | 7.269                   | 7.703           |         |
| PMCH    | li3FhfvC3jF761E00   | rs10860845 | 3.4                          | 3.26                                 | -0.064               | 0.59                         | 6.09                          | 0.4725 | 7.215                             | 0.08               | 7.113   | 7.163           | 7.197  | 7.247                   | 7.708           |         |
| PMEPA1  | TXiUTV6n4fdSBCXXrc  | rs157104   | 3.4                          | 3.26                                 | 0.065                | 0.85                         | -22.92                        | 0.48   | 7.127                             | 0.019              | 7.099   | 7.114           | 7.122  | 7.133                   | 7.236           |         |
| PMEPA1  | TXiUTV6n4fdSBCXXrc  | rs157106   | 3.38                         | 3.24                                 | -0.064               | 0.75                         | -19.77                        | 0.48   | 7.127                             | 0.019              | 7.099   | 7.114           | 7.122  | 7.133                   | 7.236           |         |
| PNPT1   | EuVBB.H5cQa9EB6BKU  | rs10496046 | 3.75                         | 3.59                                 | -0.072               | 1.58                         | -11.55                        | 0.0625 | 8.099                             | 0.263              | 7.354   | 7.928           | 8.103  | 8.274                   | 8.772           |         |

| Symbol  | Lumi nuID          | SNP        | Population-based | Population-based          | % Variance | Family-based     | Distance from | MAF    | Mean      | Transcript abundance (log2 scale) |            |            |            |         | SNP mapping under probe |         |
|---------|--------------------|------------|------------------|---------------------------|------------|------------------|---------------|--------|-----------|-----------------------------------|------------|------------|------------|---------|-------------------------|---------|
|         |                    |            | association      | association               |            | association      |               |        |           | transcript (kb)                   | Standard   | 25th       | Median     | 75th    |                         | Maximum |
|         |                    |            | p-value (-log10) | p-value (-log10), GC adj. | Explained  | p-value (-log10) |               |        | Deviation | Minimum                           | percentile | percentile | percentile | Maximum |                         |         |
| POLDIP2 | 0TpZCetCI50ewE6d7E | rs3093679  | 3.84             | 3.68                      | -0.076     | 1.42             | -9.44         | 0.07   | 8.154     | 0.14                              | 7.838      | 8.059      | 8.143      | 8.235   | 8.563                   |         |
| POLDIP2 | 0TpZCetCI50ewE6d7E | rs2710719  | 3.84             | 3.68                      | 0.076      | 1.42             | 1.65          | 0.07   | 8.154     | 0.14                              | 7.838      | 8.059      | 8.143      | 8.235   | 8.563                   |         |
| POLR1D  | 9He19lCm49ye_FX5J4 | rs14144    | 3.29             | 3.15                      | -0.062     | 2.17             | 43.24         | 0.4775 | 12.574    | 0.358                             | 9.191      | 12.406     | 12.563     | 12.769  | 13.565                  |         |
| POLR1E  | Wool8XIZOf1ISpv_nk | rs2296777  | 5.15             | 4.92                      | 0.095      | 2.53             | -1.85         | 0.175  | 9.223     | 0.342                             | 7.609      | 9.065      | 9.262      | 9.44    | 9.987                   |         |
| POLR1E  | Wool8XIZOf1ISpv_nk | rs1006763  | 3.51             | 3.36                      | 0.064      | 2.73             | 6.18          | 0.115  | 9.223     | 0.342                             | 7.609      | 9.065      | 9.262      | 9.44    | 9.987                   |         |
| POLR1E  | Wool8XIZOf1ISpv_nk | rs11789074 | 3.5              | 3.35                      | -0.065     | 2.5              | 18.68         | 0.0875 | 9.223     | 0.342                             | 7.609      | 9.065      | 9.262      | 9.44    | 9.987                   |         |
| POLR1E  | Wool8XIZOf1ISpv_nk | rs16934265 | 3.51             | 3.36                      | 0.065      | 3.22             | 31.38         | 0.11   | 9.223     | 0.342                             | 7.609      | 9.065      | 9.262      | 9.44    | 9.987                   |         |
| POLR2J  | o7ofiSa4fZCQOj7Sn4 | rs11444    | 6.54             | 6.25                      | 0.126      | 1.68             | -46.67        | 0.1575 | 7.87      | 0.243                             | 7.341      | 7.711      | 7.857      | 8       | 8.669                   |         |
| POLR2J  | o7ofiSa4fZCQOj7Sn4 | rs1131384  | 23.68            | 22.56                     | 0.427      | 1.82             | 0.29          | 0.0725 | 7.87      | 0.243                             | 7.341      | 7.711      | 7.857      | 8       | 8.669                   |         |
| POLR2J  | o7ofiSa4fZCQOj7Sn4 | rs1131383  | 9.35             | 8.92                      | 0.186      | 1.38             | 0.36          | 0.2175 | 7.87      | 0.243                             | 7.341      | 7.711      | 7.857      | 8       | 8.669                   |         |
| POLR2L  | B1dfervfSniSlp17Fc | rs12416812 | 3.42             | 3.28                      | -0.068     | 1.64             | 46.1          | 0.4725 | 8.091     | 0.292                             | 7.46       | 7.889      | 8.109      | 8.286   | 9.063                   |         |
| POLR3B  | KrSXp.7brp6dowP9UE | rs2077730  | 4.55             | 4.35                      | 0.088      | 2.17             | -34.75        | 0.4    | 8.937     | 0.231                             | 8.387      | 8.776      | 8.932      | 9.066   | 9.601                   |         |
| POLR3B  | KrSXp.7brp6dowP9UE | rs11113032 | 3.9              | 3.73                      | 0.076      | 2.61             | 32.65         | 0.2275 | 8.937     | 0.231                             | 8.387      | 8.776      | 8.932      | 9.066   | 9.601                   |         |
| POMC    | 3BINNCBlxCCpi4qRJo | rs7575363  | 3.58             | 3.42                      | -0.071     | 1.48             | -40.87        | 0.22   | 7.802     | 0.261                             | 7.306      | 7.629      | 7.759      | 7.934   | 9.013                   | Yes     |
| POMC    | 3BINNCBlxCCpi4qRJo | rs13428823 | 6.92             | 6.61                      | 0.144      | 1.87             | -10.49        | 0.39   | 7.802     | 0.261                             | 7.306      | 7.629      | 7.759      | 7.934   | 9.013                   | Yes     |
| POMC    | 3BINNCBlxCCpi4qRJo | rs934778   | 3.39             | 3.25                      | -0.066     | 1.88             | -2.23         | 0.2675 | 7.802     | 0.261                             | 7.306      | 7.629      | 7.759      | 7.934   | 9.013                   | Yes     |
| POP5    | 0kgkOI4F3nVREnpxHk | rs4766974  | 3.31             | 3.17                      | -0.06      | 3.14             | 49.92         | 0.3475 | 9.837     | 0.361                             | 9.015      | 9.595      | 9.828      | 10.108  | 10.866                  |         |
| PPA1    | WiJV9C7jXjnlllPujk | rs9971029  | 11.56            | 11.03                     | -0.206     | 3.96             | -46.12        | 0.385  | 12.643    | 0.347                             | 11.173     | 12.421     | 12.662     | 12.841  | 13.934                  |         |
| PPA1    | WiJV9C7jXjnlllPujk | rs2271690  | 7.25             | 6.93                      | 0.13       | 3.68             | -40.99        | 0.3325 | 12.643    | 0.347                             | 11.173     | 12.421     | 12.662     | 12.841  | 13.934                  |         |
| PPA1    | WiJV9C7jXjnlllPujk | rs3858169  | 9.25             | 8.83                      | 0.168      | 4.72             | -33.59        | 0.4225 | 12.643    | 0.347                             | 11.173     | 12.421     | 12.662     | 12.841  | 13.934                  |         |
| PPA1    | WiJV9C7jXjnlllPujk | rs870801   | 9.25             | 8.83                      | 0.168      | 4.7              | -32.84        | 0.4225 | 12.643    | 0.347                             | 11.173     | 12.421     | 12.662     | 12.841  | 13.934                  |         |
| PPA1    | WiJV9C7jXjnlllPujk | rs10999170 | 8.36             | 7.98                      | 0.151      | 4.58             | -26.25        | 0.3825 | 12.643    | 0.347                             | 11.173     | 12.421     | 12.662     | 12.841  | 13.934                  |         |
| PPA1    | WiJV9C7jXjnlllPujk | rs10762345 | 14.08            | 13.42                     | 0.249      | 5.02             | -23.21        | 0.345  | 12.643    | 0.347                             | 11.173     | 12.421     | 12.662     | 12.841  | 13.934                  |         |
| PPA1    | WiJV9C7jXjnlllPujk | rs6480445  | 7.05             | 6.74                      | -0.126     | 3.58             | -10.14        | 0.445  | 12.643    | 0.347                             | 11.173     | 12.421     | 12.662     | 12.841  | 13.934                  |         |
| PPA1    | WiJV9C7jXjnlllPujk | rs12412099 | 7.53             | 7.19                      | 0.137      | 4.67             | -2.64         | 0.4075 | 12.643    | 0.347                             | 11.173     | 12.421     | 12.662     | 12.841  | 13.934                  |         |
| PPA1    | WiJV9C7jXjnlllPujk | rs7072230  | 14.21            | 13.55                     | 0.256      | 4.82             | -15.03        | 0.3275 | 12.643    | 0.347                             | 11.173     | 12.421     | 12.662     | 12.841  | 13.934                  |         |
| PPA1    | WiJV9C7jXjnlllPujk | rs10509321 | 14.21            | 13.55                     | -0.256     | 4.34             | -7.44         | 0.3275 | 12.643    | 0.347                             | 11.173     | 12.421     | 12.662     | 12.841  | 13.934                  |         |
| PPA1    | WiJV9C7jXjnlllPujk | rs10999204 | 9.3              | 8.88                      | -0.169     | 2.79             | 14.13         | 0.3775 | 12.643    | 0.347                             | 11.173     | 12.421     | 12.662     | 12.841  | 13.934                  |         |
| PPA1    | WiJV9C7jXjnlllPujk | rs10999211 | 9.57             | 9.13                      | 0.176      | 3.27             | 18.99         | 0.2875 | 12.643    | 0.347                             | 11.173     | 12.421     | 12.662     | 12.841  | 13.934                  |         |
| PPFIA1  | oq0RwXIH76ITISf3t4 | rs687660   | 4.6              | 4.40                      | -0.096     | 3.43             | -5.29         | 0.32   | 7.512     | 0.164                             | 7.127      | 7.404      | 7.507      | 7.612   | 8.031                   |         |
| PPFIA1  | oq0RwXIH76ITISf3t4 | rs6592522  | 4.37             | 4.18                      | -0.084     | 4.23             | 11.45         | 0.1125 | 7.512     | 0.164                             | 7.127      | 7.404      | 7.507      | 7.612   | 8.031                   |         |
| PPFIA1  | oq0RwXIH76ITISf3t4 | rs7116059  | 3.67             | 3.52                      | 0.069      | 4.24             | 42.87         | 0.1175 | 7.512     | 0.164                             | 7.127      | 7.404      | 7.507      | 7.612   | 8.031                   |         |
| PPFIA1  | oq0RwXIH76ITISf3t4 | rs7116191  | 3.67             | 3.52                      | -0.069     | 4.24             | 42.96         | 0.1175 | 7.512     | 0.164                             | 7.127      | 7.404      | 7.507      | 7.612   | 8.031                   |         |
| PPFIA1  | oq0RwXIH76ITISf3t4 | rs627079   | 3.31             | 3.17                      | 0.062      | 2.84             | 48.68         | 0.1432 | 7.512     | 0.164                             | 7.127      | 7.404      | 7.507      | 7.612   | 8.031                   |         |
| PPFIA1  | oq0RwXIH76ITISf3t4 | rs7109643  | 4.4              | 4.21                      | -0.089     | 3.34             | -29.32        | 0.3175 | 7.512     | 0.164                             | 7.127      | 7.404      | 7.507      | 7.612   | 8.031                   |         |
| PPFIA1  | oq0RwXIH76ITISf3t4 | rs947781   | 3.67             | 3.52                      | -0.069     | 4.04             | -11.74        | 0.1175 | 7.512     | 0.164                             | 7.127      | 7.404      | 7.507      | 7.612   | 8.031                   |         |
| PPFIA1  | oq0RwXIH76ITISf3t4 | rs6592554  | 4.41             | 4.22                      | -0.085     | 4.03             | 1.54          | 0.1131 | 7.512     | 0.164                             | 7.127      | 7.404      | 7.507      | 7.612   | 8.031                   |         |
| PPFIBP1 | 0killFCCo.V54HO4jk | rs2288225  | 6.57             | 6.28                      | -0.13      | 0.6              | 9             | 0.0625 | 7.177     | 0.075                             | 7.106      | 7.137      | 7.154      | 7.185   | 7.771                   | Yes     |
| PPFIBP1 | 0killFCCo.V54HO4jk | rs11049087 | 8.05             | 7.68                      | 0.162      | 0.34             | 19.6          | 0.0775 | 7.177     | 0.075                             | 7.106      | 7.137      | 7.154      | 7.185   | 7.771                   | Yes     |
| PPFIBP1 | 0killFCCo.V54HO4jk | rs1010094  | 6.59             | 6.30                      | -0.14      | 0.87             | 43.02         | 0.1    | 7.177     | 0.075                             | 7.106      | 7.137      | 7.154      | 7.185   | 7.771                   | Yes     |
| PPFIBP2 | 9US36el0Co4kEqH3IE | rs4408288  | 11.52            | 10.99                     | 0.227      | 2.29             | -45.61        | 0.225  | 9.348     | 0.722                             | 7.3        | 9.029      | 9.436      | 9.902   | 10.612                  |         |
| PPFIBP2 | 9US36el0Co4kEqH3IE | rs4351800  | 5.11             | 4.89                      | 0.101      | 1.73             | -45.23        | 0.4025 | 9.348     | 0.722                             | 7.3        | 9.029      | 9.436      | 9.902   | 10.612                  |         |
| PPFIBP2 | 9US36el0Co4kEqH3IE | rs6578868  | 4.99             | 4.77                      | -0.107     | 0.24             | -22.46        | 0.42   | 9.348     | 0.722                             | 7.3        | 9.029      | 9.436      | 9.902   | 10.612                  |         |
| PPFIBP2 | 9US36el0Co4kEqH3IE | rs3923015  | 5.24             | 5.01                      | -0.109     | 0.19             | -14.52        | 0.1378 | 9.348     | 0.722                             | 7.3        | 9.029      | 9.436      | 9.902   | 10.612                  |         |
| PPFIBP2 | 9US36el0Co4kEqH3IE | rs7943470  | 3.66             | 3.51                      | -0.071     | 1.69             | -7.94         | 0.3925 | 9.348     | 0.722                             | 7.3        | 9.029      | 9.436      | 9.902   | 10.612                  |         |
| PPFIBP2 | 9US36el0Co4kEqH3IE | rs3884596  | 10.82            | 10.32                     | -0.216     | 2.83             | -2.88         | 0.475  | 9.348     | 0.722                             | 7.3        | 9.029      | 9.436      | 9.902   | 10.612                  |         |
| PPFIBP2 | 9US36el0Co4kEqH3IE | rs4322372  | 23.06            | 21.97                     | -0.414     | 7.51             | 20.02         | 0.47   | 9.348     | 0.722                             | 7.3        | 9.029      | 9.436      | 9.902   | 10.612                  |         |
| PPFIBP2 | 9US36el0Co4kEqH3IE | rs4757999  | 22.67            | 21.60                     | 0.407      | 7.83             | 21.01         | 0.455  | 9.348     | 0.722                             | 7.3        | 9.029      | 9.436      | 9.902   | 10.612                  |         |
| PPFIBP2 | 9US36el0Co4kEqH3IE | rs12791447 | 3.85             | 3.68                      | -0.076     | 0.49             | 21.53         | 0.075  | 9.348     | 0.722                             | 7.3        | 9.029      | 9.436      | 9.902   | 10.612                  |         |
| PPFIBP2 | 9US36el0Co4kEqH3IE | rs7925442  | 14.54            | 13.86                     | 0.276      | 5.57             | 23.68         | 0.4125 | 9.348     | 0.722                             | 7.3        | 9.029      | 9.436      | 9.902   | 10.612                  |         |
| PPFIBP2 | 9US36el0Co4kEqH3IE | rs4758001  | 22.2             | 21.15                     | -0.395     | 5.8              | 24.88         | 0.2225 | 9.348     | 0.722                             | 7.3        | 9.029      | 9.436      | 9.902   | 10.612                  |         |
| PPFIBP2 | 9US36el0Co4kEqH3IE | rs6578869  | 9.5              | 9.07                      | -0.192     | 2.91             | 26.15         | 0.24   | 9.348     | 0.722                             | 7.3        | 9.029      | 9.436      | 9.902   | 10.612                  |         |
| PPFIBP2 | 9US36el0Co4kEqH3IE | rs7481343  | 11.64            | 11.10                     | 0.233      | 5.95             | 28.59         | 0.2175 | 9.348     | 0.722                             | 7.3        | 9.029      | 9.436      | 9.902   | 10.612                  |         |
| PPFIBP2 | 9US36el0Co4kEqH3IE | rs11041434 | 5.09             | 4.87                      | 0.1        | 2                | 31.24         | 0.23   | 9.348     | 0.722                             | 7.3        | 9.029      | 9.436      | 9.902   | 10.612                  |         |
| PPFIBP2 | 9US36el0Co4kEqH3IE | rs4076808  | 10               | 9.54                      | -0.201     | 3.36             | 31.84         | 0.495  | 9.348     | 0.722                             | 7.3        | 9.029      | 9.436      | 9.902   | 10.612                  |         |
| PPFIBP2 | 9US36el0Co4kEqH3IE | rs10839804 | 6.47             | 6.18                      | 0.13       | 1.68             | 36.16         | 0.3575 | 9.348     | 0.722                             | 7.3        | 9.029      | 9.436      | 9.902   | 10.612                  |         |
| PPFIBP2 | 9US36el0Co4kEqH3IE | rs6578872  | 6.47             | 6.18                      | -0.13      | 1.68             | 36.71         | 0.3575 | 9.348     | 0.722                             | 7.3        | 9.029      | 9.436      | 9.902   | 10.612                  |         |
| PPFIBP2 | 9US36el0Co4kEqH3IE | rs7481625  | 3.74             | 3.58                      | -0.071     | 1.62             | 41.3          | 0.215  | 9.348     | 0.722                             | 7.3        | 9.029      | 9.436      | 9.902   | 10.612                  |         |
| PPFIBP2 | 9US36el0Co4kEqH3IE | rs7478756  | 6.15             | 5.88                      | 0.121      | 2.58             | 45.98         | 0.4725 | 9.348     | 0.722                             | 7.3        | 9.029      | 9.436      | 9.902   | 10.612                  |         |
| PPFIBP2 | 9US36el0Co4kEqH3IE | rs10839814 | 3.3              | 3.16                      | -0.063     | 2.02             | 53.54         | 0.1974 | 9.348     | 0.722                             | 7.3        | 9.029      | 9.436      | 9.902   | 10.612                  |         |
| PPFIBP2 | 9US36el0Co4kEqH3IE | rs7942861  | 6.69             | 6.39                      | -0.132     | 2.94             | 55.23         | 0.4975 | 9.348     | 0.722                             | 7.3        | 9.029      | 9.436      | 9.902   | 10.612                  |         |
| PPFIBP2 | 9US36el0Co4kEqH3IE | rs6578882  | 5.82             | 5.57                      | -0.113     | 0.84             | 64.34         | 0.3925 | 9.348     | 0.722                             | 7.3        | 9.029      | 9.436      | 9.902   | 10.612                  |         |

| Symbol  | Lumi nuID          | SNP        | Population-based association |                      |                           | Family-based association |                               |         | Transcript abundance (log2 scale) |                    |                 |        |                 |         | SNP mapping under probe |        |     |
|---------|--------------------|------------|------------------------------|----------------------|---------------------------|--------------------------|-------------------------------|---------|-----------------------------------|--------------------|-----------------|--------|-----------------|---------|-------------------------|--------|-----|
|         |                    |            | p-value (-log10)             | % Variance Explained | p-value (-log10), GC adj. | p-value (-log10)         | Distance from transcript (kb) | MAF     | Mean                              | Standard Deviation | 25th percentile | Median | 75th percentile | Maximum |                         |        |     |
| PPFIBP2 | 9US36e10Co4kEqH3IE | rs7933428  | 3.66                         |                      | 3.51                      | -0.069                   | 2.02                          | -67.45  | 0.1225                            | 9.348              | 0.722           | 7.3    | 9.029           | 9.436   | 9.902                   | 10.612 |     |
| PPFIBP2 | 9US36e10Co4kEqH3IE | rs12803437 | 3.57                         |                      | 3.42                      | 0.068                    | 0.38                          | -48.73  | 0.115                             | 9.348              | 0.722           | 7.3    | 9.029           | 9.436   | 9.902                   | 10.612 |     |
| PPFIBP2 | 9US36e10Co4kEqH3IE | rs7123745  | 3.57                         |                      | 3.42                      | 0.068                    | 0.38                          | -41.77  | 0.115                             | 9.348              | 0.722           | 7.3    | 9.029           | 9.436   | 9.902                   | 10.612 |     |
| PPIL3   | lkpP.i6XjxM9dUSQY  | rs7562391  | 10.74                        |                      | 10.25                     | -0.217                   | 4.73                          | 0.49    | 0.1225                            | 11.467             | 0.354           | 9.693  | 11.26           | 11.483  | 11.737                  | 12.284 |     |
| PPIL3   | lkpP.i6XjxM9dUSQY  | rs7606251  | 21.92                        |                      | 20.88                     | 0.413                    | 8.48                          | 1.05    | 0.2225                            | 11.467             | 0.354           | 9.693  | 11.26           | 11.483  | 11.737                  | 12.284 |     |
| PPIL3   | lkpP.i6XjxM9dUSQY  | rs4035021  | 9.84                         |                      | 9.39                      | -0.202                   | 3.94                          | 3.65    | 0.38                              | 11.467             | 0.354           | 9.693  | 11.26           | 11.483  | 11.737                  | 12.284 |     |
| PPIL3   | lkpP.i6XjxM9dUSQY  | rs6747253  | 13.37                        |                      | 12.76                     | 0.265                    | 5.67                          | -5.43   | 0.1425                            | 11.467             | 0.354           | 9.693  | 11.26           | 11.483  | 11.737                  | 12.284 |     |
| PPIL3   | lkpP.i6XjxM9dUSQY  | rs4381763  | 18.05                        |                      | 17.20                     | 0.347                    | 7.98                          | 23.14   | 0.175                             | 11.467             | 0.354           | 9.693  | 11.26           | 11.483  | 11.737                  | 12.284 |     |
| PPIL5   | 0vIRHut8sjD_rrHgkU | rs4898626  | 5.89                         |                      | 5.63                      | 0.125                    | 5.22                          | -26.36  | 0.4925                            | 8.884              | 0.221           | 7.362  | 8.771           | 8.897   | 9.021                   | 9.53   |     |
| PPIL5   | 0vIRHut8sjD_rrHgkU | rs9989177  | 5.48                         |                      | 5.24                      | -0.115                   | 4.71                          | 11.08   | 0.495                             | 8.884              | 0.221           | 7.362  | 8.771           | 8.897   | 9.021                   | 9.53   |     |
| PPM1M   | ilet45VBHlfn_1e0U  | rs352169   | 8.02                         |                      | 7.66                      | 0.159                    | 5.67                          | -43.42  | 0.44                              | 11.365             | 0.315           | 10.501 | 11.169          | 11.361  | 11.573                  | 12.18  |     |
| PPM1M   | ilet45VBHlfn_1e0U  | rs352165   | 8.35                         |                      | 7.98                      | -0.165                   | 5.65                          | -37.28  | 0.4375                            | 11.365             | 0.315           | 10.501 | 11.169          | 11.361  | 11.573                  | 12.18  |     |
| PPM1M   | ilet45VBHlfn_1e0U  | rs352163   | 8.55                         |                      | 8.16                      | 0.171                    | 5.99                          | -33.08  | 0.43                              | 11.365             | 0.315           | 10.501 | 11.169          | 11.361  | 11.573                  | 12.18  |     |
| PPM1M   | ilet45VBHlfn_1e0U  | rs353547   | 4.1                          |                      | 3.92                      | -0.08                    | 3.42                          | -11.32  | 0.425                             | 11.365             | 0.315           | 10.501 | 11.169          | 11.361  | 11.573                  | 12.18  |     |
| PPM1M   | ilet45VBHlfn_1e0U  | rs4082828  | 4.48                         |                      | 4.29                      | -0.09                    | 2.72                          | -5.44   | 0.1275                            | 11.365             | 0.315           | 10.501 | 11.169          | 11.361  | 11.573                  | 12.18  |     |
| PPM1M   | ilet45VBHlfn_1e0U  | rs3796343  | 3.4                          |                      | 3.26                      | -0.065                   | 3.17                          | 39.56   | 0.1675                            | 11.365             | 0.315           | 10.501 | 11.169          | 11.361  | 11.573                  | 12.18  |     |
| PPM1M   | ilet45VBHlfn_1e0U  | rs11708811 | 4.48                         |                      | 4.29                      | -0.09                    | 2.72                          | 44      | 0.1275                            | 11.365             | 0.315           | 10.501 | 11.169          | 11.361  | 11.573                  | 12.18  |     |
| PPP2CB  | B9D_FSZdtuuJdO8Rpk | rs4733203  | 3.5                          |                      | 3.35                      | -0.063                   | 0.98                          | 38.1    | 0.07                              | 9.417              | 0.306           | 8.345  | 9.226           | 9.43    | 9.586                   | 10.24  |     |
| PPP2R2B | KIS.3eurUu.71yu3nk | rs586362   | 3.85                         |                      | 3.69                      | 0.075                    | 1.48                          | -155.69 | 0.3575                            | 8.655              | 0.4             | 7.699  | 8.392           | 8.625   | 8.949                   | 9.861  |     |
| PPP2R2B | KIS.3eurUu.71yu3nk | rs471172   | 3.46                         |                      | 3.32                      | 0.066                    | 1.52                          | -148.73 | 0.4925                            | 8.655              | 0.4             | 7.699  | 8.392           | 8.625   | 8.949                   | 9.861  |     |
| PPP2R2B | KIS.3eurUu.71yu3nk | rs2436401  | 3.85                         |                      | 3.69                      | -0.075                   | 1.48                          | -148.29 | 0.3575                            | 8.655              | 0.4             | 7.699  | 8.392           | 8.625   | 8.949                   | 9.861  |     |
| PPP2R2B | KIS.3eurUu.71yu3nk | rs577197   | 3.56                         |                      | 3.40                      | 0.069                    | 1.48                          | -148.27 | 0.36                              | 8.655              | 0.4             | 7.699  | 8.392           | 8.625   | 8.949                   | 9.861  |     |
| PPP2R2B | KIS.3eurUu.71yu3nk | rs319171   | 3.56                         |                      | 3.40                      | 0.069                    | 1.2                           | -146.67 | 0.36                              | 8.655              | 0.4             | 7.699  | 8.392           | 8.625   | 8.949                   | 9.861  |     |
| PPP2R2B | KIS.3eurUu.71yu3nk | rs178549   | 3.49                         |                      | 3.34                      | -0.068                   | 1.46                          | -139.49 | 0.3575                            | 8.655              | 0.4             | 7.699  | 8.392           | 8.625   | 8.949                   | 9.861  |     |
| PPP2R2B | KIS.3eurUu.71yu3nk | rs319161   | 3.49                         |                      | 3.34                      | 0.068                    | 1.46                          | -135.32 | 0.3575                            | 8.655              | 0.4             | 7.699  | 8.392           | 8.625   | 8.949                   | 9.861  |     |
| PPP2R2B | KIS.3eurUu.71yu3nk | rs1842346  | 3.33                         |                      | 3.19                      | 0.063                    | 1.11                          | -95.82  | 0.32                              | 8.655              | 0.4             | 7.699  | 8.392           | 8.625   | 8.949                   | 9.861  |     |
| PPP3R1  | fe9S7QeU7nefQqoHJc | rs1868402  | 3.57                         |                      | 3.42                      | -0.066                   | 1.97                          | 3.05    | 0.2875                            | 10.069             | 0.463           | 8.453  | 9.791           | 10.2    | 10.39                   | 10.977 |     |
| PPWD1   | QoJUeRrHoogJm6oog  | rs6897886  | 4.26                         |                      | 4.07                      | -0.085                   | 1.55                          | -29.88  | 0.385                             | 8.094              | 0.434           | 7.135  | 7.792           | 8.028   | 8.299                   | 9.493  |     |
| PPWD1   | QoJUeRrHoogJm6oog  | rs460262   | 5.5                          |                      | 5.25                      | 0.112                    | 2.38                          | 4.7     | 0.37                              | 8.094              | 0.434           | 7.135  | 7.792           | 8.028   | 8.299                   | 9.493  |     |
| PPWD1   | QoJUeRrHoogJm6oog  | rs36133    | 5.5                          |                      | 5.25                      | 0.112                    | 2.35                          | 9.14    | 0.37                              | 8.094              | 0.434           | 7.135  | 7.792           | 8.028   | 8.299                   | 9.493  |     |
| PPWD1   | QoJUeRrHoogJm6oog  | rs154861   | 5.4                          |                      | 5.17                      | 0.109                    | 2.35                          | 13.68   | 0.3725                            | 8.094              | 0.434           | 7.135  | 7.792           | 8.028   | 8.299                   | 9.493  |     |
| PPWD1   | QoJUeRrHoogJm6oog  | rs468754   | 5.47                         |                      | 5.23                      | 0.112                    | 2.35                          | 36.08   | 0.3719                            | 8.094              | 0.434           | 7.135  | 7.792           | 8.028   | 8.299                   | 9.493  |     |
| PRDX6   | id6UKK7JK7iQzy5TuU | rs4405161  | 5.79                         |                      | 5.59                      | -0.122                   | 1.77                          | -31.49  | 0.33                              | 10.864             | 0.309           | 9.879  | 10.68           | 10.889  | 11.066                  | 11.9   | Yes |
| PRDX6   | id6UKK7JK7iQzy5TuU | rs12140760 | 4.8                          |                      | 4.4                       | -0.1                     | 0.94                          | -16.49  | 0.3825                            | 10.864             | 0.309           | 9.879  | 10.68           | 10.889  | 11.066                  | 11.9   | Yes |
| PRF1    | Kj0V7UB5cJXWU90JXk | rs2394730  | 3.29                         |                      | 3.15                      | -0.062                   | 0.42                          | -36.6   | 0.397                             | 10.095             | 0.642           | 8.709  | 9.697           | 10.075  | 10.536                  | 12.165 |     |
| PRKACA  | ovQpyJ56oqnl7.HRUU | rs3786661  | 3.72                         |                      | 3.56                      | 0.074                    | 2.02                          | -6.05   | 0.2424                            | 7.19               | 0.083           | 7.105  | 7.137           | 7.167   | 7.218                   | 7.798  |     |
| PRKCB1  | 04.BQghp5olySHSI7o | rs1976194  | 3.68                         |                      | 3.52                      | -0.07                    | 1.13                          | -165.88 | 0.4925                            | 12.109             | 0.324           | 11.417 | 11.892          | 12.053  | 12.289                  | 13.38  |     |
| PRKCB1  | 04.BQghp5olySHSI7o | rs10852259 | 6.26                         |                      | 5.98                      | -0.121                   | 2.4                           | -159.01 | 0.26                              | 12.109             | 0.324           | 11.417 | 11.892          | 12.053  | 12.289                  | 13.38  |     |
| PRKCB1  | 04.BQghp5olySHSI7o | rs16973180 | 6.26                         |                      | 5.98                      | -0.121                   | 2.42                          | -156.93 | 0.26                              | 12.109             | 0.324           | 11.417 | 11.892          | 12.053  | 12.289                  | 13.38  |     |
| PRKCB1  | 04.BQghp5olySHSI7o | rs7193148  | 8.43                         |                      | 8.05                      | 0.165                    | 3                             | -155.85 | 0.1625                            | 12.109             | 0.324           | 11.417 | 11.892          | 12.053  | 12.289                  | 13.38  |     |
| PRKCB1  | EQiiRdQfYQlvRSEI7o | rs7193148  | 4.43                         |                      | 4.23                      | 0.083                    | 2.86                          | -160.08 | 0.1625                            | 9.605              | 0.414           | 7.258  | 9.422           | 9.598   | 9.817                   | 10.691 |     |
| PRKCB1  | 04.BQghp5olySHSI7o | rs7195728  | 15.88                        |                      | 15.14                     | -0.301                   | 3.33                          | -146.86 | 0.0775                            | 12.109             | 0.324           | 11.417 | 11.892          | 12.053  | 12.289                  | 13.38  |     |
| PRKCB1  | EQiiRdQfYQlvRSEI7o | rs7195728  | 9.04                         |                      | 8.63                      | -0.175                   | 2.1                           | -151.1  | 0.0775                            | 9.605              | 0.414           | 7.258  | 9.422           | 9.598   | 9.817                   | 10.691 |     |
| PRKCB1  | I9azPj6iAfgZAINSVU | rs7195728  | 3.86                         |                      | 3.69                      | -0.073                   | 0.62                          | -151.1  | 0.0775                            | 9.088              | 0.564           | 7.121  | 8.699           | 9.056   | 9.48                    | 10.563 |     |
| PRKCB1  | 04.BQghp5olySHSI7o | rs9929918  | 15.86                        |                      | 15.12                     | -0.303                   | 3.41                          | -145.28 | 0.0783                            | 12.109             | 0.324           | 11.417 | 11.892          | 12.053  | 12.289                  | 13.38  |     |
| PRKCB1  | EQiiRdQfYQlvRSEI7o | rs9929918  | 9.05                         |                      | 8.64                      | -0.176                   | 2.06                          | -149.51 | 0.0783                            | 9.605              | 0.414           | 7.258  | 9.422           | 9.598   | 9.817                   | 10.691 |     |
| PRKCB1  | I9azPj6iAfgZAINSVU | rs9929918  | 3.82                         |                      | 3.66                      | -0.073                   | 0.66                          | -149.51 | 0.0783                            | 9.088              | 0.564           | 7.121  | 8.699           | 9.056   | 9.48                    | 10.563 |     |
| PRKCB1  | 04.BQghp5olySHSI7o | rs11648535 | 18.22                        |                      | 17.37                     | -0.339                   | 3.62                          | -141.8  | 0.0725                            | 12.109             | 0.324           | 11.417 | 11.892          | 12.053  | 12.289                  | 13.38  |     |
| PRKCB1  | EQiiRdQfYQlvRSEI7o | rs11648535 | 9.87                         |                      | 9.42                      | -0.191                   | 2.08                          | -146.04 | 0.0725                            | 9.605              | 0.414           | 7.258  | 9.422           | 9.598   | 9.817                   | 10.691 |     |
| PRKCB1  | I9azPj6iAfgZAINSVU | rs11648535 | 3.47                         |                      | 3.32                      | -0.065                   | 0.68                          | -146.04 | 0.0725                            | 9.088              | 0.564           | 7.121  | 8.699           | 9.056   | 9.48                    | 10.563 |     |
| PRKG2   | KeE4tSoikI_JDLs6RQ | rs3733553  | 3.32                         |                      | 3.18                      | -0.065                   | 3.06                          | -11.71  | 0.2275                            | 7.156              | 0.036           | 7.101  | 7.133           | 7.146   | 7.169                   | 7.321  |     |
| PRMT2   | c6eraJ1O9CJylytXHU | rs2839357  | 4.24                         |                      | 4.06                      | 0.08                     | 0.85                          | -32.64  | 0.1275                            | 10.577             | 0.36            | 9.484  | 10.333          | 10.535  | 10.807                  | 11.707 |     |
| PROSC   | BX7XiiR.UpMvEn1Uew | rs7463174  | 3.45                         |                      | 3.30                      | 0.07                     | 3.09                          | -1.64   | 0.1843                            | 10.847             | 0.283           | 9.634  | 10.76           | 10.884  | 10.993                  | 11.386 |     |
| PRPF4B  | oQk5E.65PQg6ANIMkk | rs723796   | 4.38                         |                      | 4.19                      | 0.082                    | 1.03                          | 9.55    | 0.1175                            | 7.114              | 0.027           | 7.094  | 7.104           | 7.107   | 7.115                   | 7.398  |     |
| PRR17   | fICwXVCeFeFSVRHe4  | rs6011248  | 24.18                        |                      | 23.03                     | -0.443                   | 7.25                          | -43.34  | 0.1725                            | 7.164              | 0.089           | 7.101  | 7.116           | 7.128   | 7.164                   | 7.596  | Yes |
| PRR17   | fICwXVCeFeFSVRHe4  | rs2427590  | 24.18                        |                      | 23.03                     | -0.443                   | 7.25                          | -27.44  | 0.1725                            | 7.164              | 0.089           | 7.101  | 7.116           | 7.128   | 7.164                   | 7.596  | Yes |
| PRR17   | fICwXVCeFeFSVRHe4  | rs816922   | 36.4                         |                      | 34.66                     | 0.579                    | 4.21                          | -18.53  | 0.065                             | 7.164              | 0.089           | 7.101  | 7.116           | 7.128   | 7.164                   | 7.596  | Yes |
| PRR17   | fICwXVCeFeFSVRHe4  | rs816931   | 36.4                         |                      | 34.66                     | 0.579                    | 4.07                          | -10.65  | 0.065                             | 7.164              | 0.089           | 7.101  | 7.116           | 7.128   | 7.164                   | 7.596  | Yes |
| PRR4    | uGKEW0hd3FWP197SXk | rs2298866  | 3.71                         |                      | 3.55                      | -0.069                   | 0.5                           | 31.93   | 0.4175                            | 7.548              | 0.159           | 7.168  | 7.433           | 7.541   | 7.65                    | 8.04   |     |
| PRR6    | 0Qf53V5bl2uudeDung | rs3112511  | 5.9                          |                      | 5.64                      | -0.118                   | 1.4                           | -38.32  | 0.3975                            | 9.098              | 0.298           | 8.339  | 8.869           | 9.076   | 9.29                    | 10.396 |     |
| PRR6    | 0Qf53V5bl2uudeDung | rs9944524  | 4.35                         |                      | 4.16                      | -0.084                   | 0.95                          | -33.2   | 0.4575                            | 9.098              | 0.298           | 8.339  | 8.869           | 9.076   | 9.29                    | 10.396 |     |
| PRR6    | 0Qf53V5bl2uudeDung | rs9890539  | 6.18                         |                      | 5.90                      | 0.123                    | 1.93                          | -24.53  | 0.4121                            | 9.098              | 0.298           | 8.339  | 8.869           | 9.076   | 9.29                    | 10.396 |     |

| Symbol  | Lumi nuID          | SNP        | Population-based association |                  | % Variance Explained | Family-based association |                               | Transcript abundance (log2 scale) |        |                    |                 |        |                 |         | SNP mapping under probe |     |
|---------|--------------------|------------|------------------------------|------------------|----------------------|--------------------------|-------------------------------|-----------------------------------|--------|--------------------|-----------------|--------|-----------------|---------|-------------------------|-----|
|         |                    |            | p-value (-log10)             | p-value (-log10) |                      | p-value (-log10)         | Distance from transcript (kb) | MAF                               | Mean   | Standard Deviation | 25th percentile | Median | 75th percentile | Maximum |                         |     |
| PRR6    | 0Qf53V5b12uudeDung | rs1476810  | 4.86                         | 4.65             | -0.095               | 1.34                     | -12.63                        | 0.465                             | 0.908  | 0.298              | 8.339           | 8.869  | 9.076           | 9.29    | 10.396                  |     |
| PRR6    | 0Qf53V5b12uudeDung | rs7477     | 4.39                         | 4.20             | -0.084               | 1.35                     | 0.17                          | 0.465                             | 0.908  | 0.298              | 8.339           | 8.869  | 9.076           | 9.29    | 10.396                  |     |
| PRRX1   | xBv11QjvxxGp9MGj0  | rs12038255 | 4.2                          | 4.02             | -0.076               | 0.46                     | -14.85                        | 0.1975                            | 7.171  | 0.05               | 7.103           | 7.136  | 7.163           | 7.196   | 7.534                   |     |
| PRSS16  | uKl6ijKnDVCr158pzs | rs13219354 | 4.3                          | 4.12             | -0.073               | 3.72                     | -29.84                        | 0.1156                            | 7.302  | 0.129              | 7.123           | 7.209  | 7.284           | 7.358   | 7.786                   |     |
| PRSS16  | uKl6ijKnDVCr158pzs | rs4452638  | 4.31                         | 4.12             | -0.073               | 3.8                      | 5.01                          | 0.115                             | 7.302  | 0.129              | 7.123           | 7.209  | 7.284           | 7.358   | 7.786                   |     |
| PRSS16  | uKl6ijKnDVCr158pzs | rs6938200  | 9.66                         | 9.22             | 0.168                | 3.77                     | 6.9                           | 0.1784                            | 7.302  | 0.129              | 7.123           | 7.209  | 7.284           | 7.358   | 7.786                   |     |
| PRSS16  | uKl6ijKnDVCr158pzs | rs6915678  | 4.73                         | 4.53             | -0.081               | 4.08                     | 11.62                         | 0.3668                            | 7.302  | 0.129              | 7.123           | 7.209  | 7.284           | 7.358   | 7.786                   |     |
| PRSS16  | uKl6ijKnDVCr158pzs | rs6932590  | 4.92                         | 4.71             | -0.087               | 2.53                     | 24.68                         | 0.2375                            | 7.302  | 0.129              | 7.123           | 7.209  | 7.284           | 7.358   | 7.786                   |     |
| PRSS16  | uKl6ijKnDVCr158pzs | rs7746199  | 3.53                         | 3.38             | 0.059                | 1.4                      | 37.07                         | 0.1625                            | 7.302  | 0.129              | 7.123           | 7.209  | 7.284           | 7.358   | 7.786                   |     |
| PRSS35  | WSdOV00.M_7ze_reoQ | rs6901074  | 4.34                         | 4.16             | 0.083                | 0.79                     | -48.33                        | 0.32                              | 7.13   | 0.028              | 7.098           | 7.116  | 7.123           | 7.138   | 7.403                   |     |
| PRSS35  | WSdOV00.M_7ze_reoQ | rs12203860 | 4.7                          | 4.49             | 0.091                | 0.89                     | -47.87                        | 0.2825                            | 7.13   | 0.028              | 7.098           | 7.116  | 7.123           | 7.138   | 7.403                   |     |
| PSAT1   | Ek9TyQi_xVdVLFZfXc | rs10780231 | 3.92                         | 3.76             | 0.074                | 0.98                     | -1.39                         | 0.3325                            | 8.226  | 0.317              | 7.417           | 8.017  | 8.198           | 8.445   | 9.56                    |     |
| PSAT1   | Ek9TyQi_xVdVLFZfXc | rs2788867  | 4.77                         | 4.56             | 0.093                | 0.63                     | 13.91                         | 0.1475                            | 8.226  | 0.317              | 7.417           | 8.017  | 8.198           | 8.445   | 9.56                    |     |
| PSAT1   | oZPpDIAojn8gAl.fg  | rs10867188 | 4.18                         | 4.00             | -0.083               | 0.48                     | 37.41                         | 0.0725                            | 7.131  | 0.029              | 7.099           | 7.115  | 7.124           | 7.135   | 7.383                   |     |
| PSAT1   | oZPpDIAojn8gAl.fg  | rs11137631 | 4.18                         | 4.00             | -0.083               | 0.48                     | 40.48                         | 0.0725                            | 7.131  | 0.029              | 7.099           | 7.115  | 7.124           | 7.135   | 7.383                   |     |
| PSEN2   | iF6ud6eiKAS9XGKLS  | rs10916066 | 3.73                         | 3.57             | -0.067               | 2.2                      | 14.79                         | 0.25                              | 7.435  | 0.213              | 7.12            | 7.295  | 7.401           | 7.537   | 8.49                    |     |
| PSMB9   | x6gOLnSojonyqK6ufU | rs3763349  | 6.58                         | 6.28             | 0.136                | 3.2                      | -13.71                        | 0.47                              | 8.962  | 0.31               | 8.089           | 8.756  | 8.985           | 9.175   | 9.985                   |     |
| PSMB9   | x6gOLnSojonyqK6ufU | rs9357155  | 4.61                         | 4.41             | 0.092                | 0.77                     | -12.09                        | 0.11                              | 8.962  | 0.31               | 8.089           | 8.756  | 8.985           | 9.175   | 9.985                   |     |
| PSMB9   | x6gOLnSojonyqK6ufU | rs6924102  | 4.84                         | 4.63             | 0.099                | 1.4                      | -10.55                        | 0.37                              | 8.962  | 0.31               | 8.089           | 8.756  | 8.985           | 9.175   | 9.985                   |     |
| PSMB9   | x6gOLnSojonyqK6ufU | rs2071543  | 4.04                         | 3.86             | -0.079               | 0.58                     | -10.31                        | 0.12                              | 8.962  | 0.31               | 8.089           | 8.756  | 8.985           | 9.175   | 9.985                   |     |
| PSMB9   | x6gOLnSojonyqK6ufU | rs2071540  | 9.73                         | 9.29             | -0.194               | 3.15                     | -9.02                         | 0.465                             | 8.962  | 0.31               | 8.089           | 8.756  | 8.985           | 9.175   | 9.985                   |     |
| PSMB9   | x6gOLnSojonyqK6ufU | rs4713600  | 25.4                         | 24.20            | 0.44                 | 5.01                     | 0.92                          | 0.39                              | 8.962  | 0.31               | 8.089           | 8.756  | 8.985           | 9.175   | 9.985                   |     |
| PSMB9   | x6gOLnSojonyqK6ufU | rs17587    | 14.59                        | 13.91            | -0.284               | 3.16                     | -2.54                         | 0.225                             | 8.962  | 0.31               | 8.089           | 8.756  | 8.985           | 9.175   | 9.985                   |     |
| PSMB9   | x6gOLnSojonyqK6ufU | rs2071477  | 25.4                         | 24.20            | -0.44                | 5.01                     | -2.28                         | 0.39                              | 8.962  | 0.31               | 8.089           | 8.756  | 8.985           | 9.175   | 9.985                   |     |
| PSMB9   | x6gOLnSojonyqK6ufU | rs9276831  | 4.85                         | 4.64             | 0.1                  | 1.68                     | 4.41                          | 0.1125                            | 8.962  | 0.31               | 8.089           | 8.756  | 8.985           | 9.175   | 9.985                   |     |
| PSMB9   | x6gOLnSojonyqK6ufU | rs6929078  | 18.07                        | 17.23            | -0.335               | 3.82                     | 11.04                         | 0.3275                            | 8.962  | 0.31               | 8.089           | 8.756  | 8.985           | 9.175   | 9.985                   |     |
| PSMB9   | x6gOLnSojonyqK6ufU | rs9276857  | 18.07                        | 17.23            | -0.335               | 3.67                     | 13.69                         | 0.3275                            | 8.962  | 0.31               | 8.089           | 8.756  | 8.985           | 9.175   | 9.985                   |     |
| PSMB9   | x6gOLnSojonyqK6ufU | rs7757767  | 18.07                        | 17.23            | 0.335                | 3.66                     | 18.25                         | 0.3275                            | 8.962  | 0.31               | 8.089           | 8.756  | 8.985           | 9.175   | 9.985                   |     |
| PSMB9   | x6gOLnSojonyqK6ufU | rs241405   | 11.73                        | 11.19            | 0.233                | 2.64                     | 38.17                         | 0.48                              | 8.962  | 0.31               | 8.089           | 8.756  | 8.985           | 9.175   | 9.985                   |     |
| PSMB9   | x6gOLnSojonyqK6ufU | rs241404   | 7.64                         | 7.29             | -0.152               | 1.42                     | 38.37                         | 0.3875                            | 8.962  | 0.31               | 8.089           | 8.756  | 8.985           | 9.175   | 9.985                   |     |
| PSMB9   | x6gOLnSojonyqK6ufU | rs3101942  | 6.96                         | 6.65             | -0.145               | 2.4                      | 42.43                         | 0.4275                            | 8.962  | 0.31               | 8.089           | 8.756  | 8.985           | 9.175   | 9.985                   |     |
| PSMB9   | x6gOLnSojonyqK6ufU | rs241398   | 7.64                         | 7.29             | 0.152                | 1.39                     | 47.82                         | 0.3875                            | 8.962  | 0.31               | 8.089           | 8.756  | 8.985           | 9.175   | 9.985                   |     |
| PSTPIP2 | Z.kCpQP1UB4Gp0oDvU | rs920296   | 3.68                         | 3.53             | -0.069               | 2.02                     | -0.65                         | 0.1475                            | 8.972  | 0.448              | 7.139           | 8.667  | 8.988           | 9.272   | 10.404                  | Yes |
| PSTPIP2 | Z.kCpQP1UB4Gp0oDvU | rs920295   | 4.38                         | 4.19             | -0.083               | 2.51                     | -0.48                         | 0.0975                            | 8.972  | 0.448              | 7.139           | 8.667  | 8.988           | 9.272   | 10.404                  | Yes |
| PSTPIP2 | Z.kCpQP1UB4Gp0oDvU | rs7227161  | 3.94                         | 3.77             | 0.074                | 2.08                     | 3.7                           | 0.145                             | 8.972  | 0.448              | 7.139           | 8.667  | 8.988           | 9.272   | 10.404                  | Yes |
| PSTPIP2 | Z.kCpQP1UB4Gp0oDvU | rs2276199  | 3.94                         | 3.77             | 0.074                | 2.08                     | 5.21                          | 0.145                             | 8.972  | 0.448              | 7.139           | 8.667  | 8.988           | 9.272   | 10.404                  | Yes |
| PSTPIP2 | Z.kCpQP1UB4Gp0oDvU | rs3745001  | 3.97                         | 3.80             | 0.075                | 2.45                     | 10.48                         | 0.1025                            | 8.972  | 0.448              | 7.139           | 8.667  | 8.988           | 9.272   | 10.404                  | Yes |
| PSTPIP2 | Z.kCpQP1UB4Gp0oDvU | rs9675392  | 4.61                         | 4.41             | -0.086               | 1.94                     | 22.03                         | 0.18                              | 8.972  | 0.448              | 7.139           | 8.667  | 8.988           | 9.272   | 10.404                  | Yes |
| PSTPIP2 | Z.kCpQP1UB4Gp0oDvU | rs687526   | 4.94                         | 4.73             | -0.096               | 2.67                     | 27.49                         | 0.1                               | 8.972  | 0.448              | 7.139           | 8.667  | 8.988           | 9.272   | 10.404                  | Yes |
| PSTPIP2 | Z.kCpQP1UB4Gp0oDvU | rs654466   | 4.04                         | 3.87             | -0.076               | 1.51                     | 31.31                         | 0.1875                            | 8.972  | 0.448              | 7.139           | 8.667  | 8.988           | 9.272   | 10.404                  | Yes |
| PSTPIP2 | Z.kCpQP1UB4Gp0oDvU | rs10502871 | 4.09                         | 3.91             | -0.077               | 1.62                     | 33.32                         | 0.18                              | 8.972  | 0.448              | 7.139           | 8.667  | 8.988           | 9.272   | 10.404                  | Yes |
| PTCH1   | QuXIFROt5TXBFSd50g | rs10512249 | 6.05                         | 5.78             | -0.123               | 0.39                     | -14.52                        | 0.075                             | 7.341  | 0.165              | 7.108           | 7.212  | 7.313           | 7.437   | 8.206                   |     |
| PTER    | 0XSIEh_yw0.gpdFy7U | rs7909832  | 58.84                        | 56.01            | -0.752               | 11.15                    | 0.97                          | 0.44                              | 7.844  | 0.396              | 7.121           | 7.664  | 7.874           | 8.113   | 8.781                   |     |
| PTER    | 0XSIEh_yw0.gpdFy7U | rs2298126  | 20.22                        | 19.27            | -0.377               | 7.67                     | 3.25                          | 0.3655                            | 7.844  | 0.396              | 7.121           | 7.664  | 7.874           | 8.113   | 8.781                   |     |
| PTER    | 0XSIEh_yw0.gpdFy7U | rs7913889  | 6.1                          | 5.83             | 0.119                | 2.14                     | 3.64                          | 0.185                             | 7.844  | 0.396              | 7.121           | 7.664  | 7.874           | 8.113   | 8.781                   |     |
| PTER    | 0XSIEh_yw0.gpdFy7U | rs11254053 | 7.14                         | 6.82             | -0.147               | 1.8                      | 11.56                         | 0.2875                            | 7.844  | 0.396              | 7.121           | 7.664  | 7.874           | 8.113   | 8.781                   |     |
| PTER    | 0XSIEh_yw0.gpdFy7U | rs10904768 | 3.53                         | 3.38             | -0.068               | 0.52                     | 19.53                         | 0.1055                            | 7.844  | 0.396              | 7.121           | 7.664  | 7.874           | 8.113   | 8.781                   |     |
| PTER    | 0XSIEh_yw0.gpdFy7U | rs7086455  | 3.44                         | 3.30             | 0.065                | 0.43                     | 27.51                         | 0.1875                            | 7.844  | 0.396              | 7.121           | 7.664  | 7.874           | 8.113   | 8.781                   |     |
| PTER    | 0XSIEh_yw0.gpdFy7U | rs7084722  | 15.02                        | 14.32            | -0.298               | 5.34                     | 39.66                         | 0.4375                            | 7.844  | 0.396              | 7.121           | 7.664  | 7.874           | 8.113   | 8.781                   |     |
| PTER    | 0XSIEh_yw0.gpdFy7U | rs10904772 | 3.72                         | 3.56             | 0.074                | 4.36                     | 49.45                         | 0.3687                            | 7.844  | 0.396              | 7.121           | 7.664  | 7.874           | 8.113   | 8.781                   |     |
| PTGIR   | WNuQcQaigqinnk_6uM | rs1126510  | 3.56                         | 3.41             | -0.066               | 2.18                     | 0.06                          | 0.345                             | 7.259  | 0.081              | 7.116           | 7.201  | 7.247           | 7.307   | 7.545                   | Yes |
| PTPLA   | Eli7m_3rZuh7hijR0  | rs6602207  | 3.37                         | 3.23             | 0.063                | 1.94                     | 39.51                         | 0.445                             | 7.618  | 0.177              | 7.159           | 7.486  | 7.615           | 7.73    | 8.163                   |     |
| PTPN1   | iFeSJzriu6MKFK5Sns | rs4602269  | 4.98                         | 4.73             | -0.093               | 1.13                     | -28.85                        | 0.05                              | 10.885 | 0.258              | 9.328           | 10.773 | 10.889          | 11.062  | 11.477                  |     |
| PUS3    | cwlXToW1wOUKHoNWJU | rs481056   | 3.92                         | 3.75             | -0.076               | 1.16                     | -2.96                         | 0.105                             | 9.268  | 0.305              | 8.535           | 9.05   | 9.223           | 9.484   | 10.132                  |     |
| PUS3    | cwlXToW1wOUKHoNWJU | rs529457   | 3.78                         | 3.62             | 0.074                | 1.2                      | -4.18                         | 0.1075                            | 9.268  | 0.305              | 8.535           | 9.05   | 9.223           | 9.484   | 10.132                  |     |
| PUS7    | r6EKf33NLJvxx_0Uuk | rs11764594 | 8.04                         | 7.68             | 0.18                 | 4.58                     | -6.75                         | 0.1472                            | 8.402  | 0.242              | 7.635           | 8.249  | 8.366           | 8.58    | 9.075                   |     |
| PUS7    | r6EKf33NLJvxx_0Uuk | rs10273718 | 3.78                         | 3.62             | -0.078               | 2.71                     | 11.29                         | 0.21                              | 8.402  | 0.242              | 7.635           | 8.249  | 8.366           | 8.58    | 9.075                   |     |
| PUS7    | r6EKf33NLJvxx_0Uuk | rs6466070  | 3.79                         | 3.63             | -0.076               | 0.86                     | 11.7                          | 0.4293                            | 8.402  | 0.242              | 7.635           | 8.249  | 8.366           | 8.58    | 9.075                   |     |
| PVALB   | 6npj56lQl6oaQD6r4Y | rs4821544  | 4.21                         | 4.03             | 0.079                | 1.05                     | 42.99                         | 0.36                              | 7.248  | 0.14               | 7.113           | 7.178  | 7.212           | 7.263   | 8.156                   | Yes |
| PYGB    | EqBKce19Xug_WIDckU | rs6083776  | 4.74                         | 4.53             | -0.096               | 4.31                     | -42.59                        | 0.4575                            | 9.433  | 0.401              | 8.648           | 9.145  | 9.37            | 9.729   | 10.536                  | Yes |
| PYGB    | EqBKce19Xug_WIDckU | rs2076559  | 3.84                         | 3.68             | -0.075               | 2.38                     | -41.49                        | 0.31                              | 9.433  | 0.401              | 8.648           | 9.145  | 9.37            | 9.729   | 10.536                  | Yes |
| PYGB    | EqBKce19Xug_WIDckU | rs1007707  | 4.74                         | 4.53             | 0.096                | 3.84                     | -38.07                        | 0.4575                            | 9.433  | 0.401              | 8.648           | 9.145  | 9.37            | 9.729   | 10.536                  | Yes |

| Symbol    | Lumi nuID          | SNP        | Population-based | Population-based          | % Variance | Family-based     | Distance from | MAF    | Mean      | Transcript abundance (log2 scale) |            |            |            |        | SNP mapping under probe |         |
|-----------|--------------------|------------|------------------|---------------------------|------------|------------------|---------------|--------|-----------|-----------------------------------|------------|------------|------------|--------|-------------------------|---------|
|           |                    |            | association      | association               |            | association      |               |        |           | transcript (kb)                   | Standard   | 25th       | Median     | 75th   |                         | Maximum |
|           |                    |            | p-value (-log10) | p-value (-log10), GC adj. | Explained  | p-value (-log10) |               |        | Deviation | percentile                        | percentile | percentile | percentile |        |                         |         |
| PYGB      | EqBKc19Xug_WIDckU  | rs3746337  | 5.18             | 4.95                      | 0.107      | 2.48             | -20.43        | 0.46   | 9.433     | 0.401                             | 8.648      | 9.145      | 9.37       | 9.729  | 10.536                  | Yes     |
| PYGB      | EqBKc19Xug_WIDckU  | rs11697384 | 3.55             | 3.40                      | 0.069      | 1.39             | -22.05        | 0.2925 | 9.433     | 0.401                             | 8.648      | 9.145      | 9.37       | 9.729  | 10.536                  | Yes     |
| PYGB      | EqBKc19Xug_WIDckU  | rs2274890  | 4.9              | 4.69                      | -0.101     | 1.93             | 22.37         | 0.25   | 9.433     | 0.401                             | 8.648      | 9.145      | 9.37       | 9.729  | 10.536                  | Yes     |
| QRSL1     | QnjgkqiQZOkiH5fFU  | rs7756087  | 7.96             | 7.60                      | -0.151     | 2.55             | -38.02        | 0.3593 | 7.36      | 0.15                              | 7.113      | 7.242      | 7.353      | 7.453  | 8.107                   |         |
| QRSL1     | QnjgkqiQZOkiH5fFU  | rs898896   | 4.84             | 4.63                      | -0.09      | 1.28             | -14.29        | 0.3375 | 7.36      | 0.15                              | 7.113      | 7.242      | 7.353      | 7.453  | 8.107                   |         |
| QRSL1     | QnjgkqiQZOkiH5fFU  | rs2054365  | 13.55            | 12.93                     | 0.254      | 3.78             | 0.05          | 0.41   | 7.36      | 0.15                              | 7.113      | 7.242      | 7.353      | 7.453  | 8.107                   |         |
| QRSL1     | QnjgkqiQZOkiH5fFU  | rs1419055  | 14.89            | 14.20                     | 0.281      | 5.6              | 7.26          | 0.4337 | 7.36      | 0.15                              | 7.113      | 7.242      | 7.353      | 7.453  | 8.107                   |         |
| QRSL1     | QnjgkqiQZOkiH5fFU  | rs7750365  | 18.6             | 17.73                     | 0.348      | 7.74             | 11.84         | 0.447  | 7.36      | 0.15                              | 7.113      | 7.242      | 7.353      | 7.453  | 8.107                   |         |
| QRSL1     | QnjgkqiQZOkiH5fFU  | rs3804345  | 17.79            | 16.95                     | 0.326      | 7.44             | -17.32        | 0.4898 | 7.36      | 0.15                              | 7.113      | 7.242      | 7.353      | 7.453  | 8.107                   |         |
| QRSL1     | QnjgkqiQZOkiH5fFU  | rs3127657  | 16.76            | 15.97                     | 0.31       | 6.79             | -11.04        | 0.4596 | 7.36      | 0.15                              | 7.113      | 7.242      | 7.353      | 7.453  | 8.107                   |         |
| QRSL1     | QnjgkqiQZOkiH5fFU  | rs3101493  | 19.19            | 18.28                     | -0.356     | 7.71             | -0.02         | 0.404  | 7.36      | 0.15                              | 7.113      | 7.242      | 7.353      | 7.453  | 8.107                   |         |
| QRSL1     | QnjgkqiQZOkiH5fFU  | rs3121447  | 15.13            | 14.43                     | 0.281      | 6.65             | 1.03          | 0.4646 | 7.36      | 0.15                              | 7.113      | 7.242      | 7.353      | 7.453  | 8.107                   |         |
| QRSL1     | QnjgkqiQZOkiH5fFU  | rs3121445  | 18.85            | 17.97                     | 0.347      | 8.1              | 8.47          | 0.405  | 7.36      | 0.15                              | 7.113      | 7.242      | 7.353      | 7.453  | 8.107                   |         |
| QRSL1     | QnjgkqiQZOkiH5fFU  | rs9386579  | 4.72             | 4.52                      | 0.089      | 1.98             | 20.26         | 0.285  | 7.36      | 0.15                              | 7.113      | 7.242      | 7.353      | 7.453  | 8.107                   |         |
| QRSL1     | QnjgkqiQZOkiH5fFU  | rs12209982 | 4.15             | 3.97                      | -0.078     | 1.46             | 21.19         | 0.225  | 7.36      | 0.15                              | 7.113      | 7.242      | 7.353      | 7.453  | 8.107                   |         |
| QRSL1     | QnjgkqiQZOkiH5fFU  | rs3104037  | 5.83             | 5.57                      | -0.112     | 3.42             | 24.25         | 0.4225 | 7.36      | 0.15                              | 7.113      | 7.242      | 7.353      | 7.453  | 8.107                   |         |
| QRSL1     | QnjgkqiQZOkiH5fFU  | rs17067644 | 3.38             | 3.23                      | -0.062     | 1.03             | 24.95         | 0.1482 | 7.36      | 0.15                              | 7.113      | 7.242      | 7.353      | 7.453  | 8.107                   |         |
| QRSL1     | QnjgkqiQZOkiH5fFU  | rs6940205  | 3.95             | 3.78                      | 0.075      | 1.2              | 25.84         | 0.2025 | 7.36      | 0.15                              | 7.113      | 7.242      | 7.353      | 7.453  | 8.107                   |         |
| QRSL1     | QnjgkqiQZOkiH5fFU  | rs910528   | 6.71             | 6.41                      | 0.13       | 2.78             | 36.11         | 0.4525 | 7.36      | 0.15                              | 7.113      | 7.242      | 7.353      | 7.453  | 8.107                   |         |
| QRSL1     | QnjgkqiQZOkiH5fFU  | rs2077953  | 4.29             | 4.11                      | 0.082      | 1.1              | 42.62         | 0.275  | 7.36      | 0.15                              | 7.113      | 7.242      | 7.353      | 7.453  | 8.107                   |         |
| QRSL1     | QnjgkqiQZOkiH5fFU  | rs2748293  | 3.59             | 3.44                      | 0.067      | 1                | 45.08         | 0.2663 | 7.36      | 0.15                              | 7.113      | 7.242      | 7.353      | 7.453  | 8.107                   |         |
| RAB11F1P5 | EJRH6KAvkrq_pKISk4 | rs17008611 | 6.39             | 6.10                      | 0.123      | 2.02             | -38.66        | 0.2085 | 8.475     | 0.305                             | 7.729      | 8.295      | 8.444      | 8.635  | 9.546                   |         |
| RAB11F1P5 | EJRH6KAvkrq_pKISk4 | rs6710739  | 5.38             | 5.38                      | 0.112      | 2.14             | -21.52        | 0.2175 | 8.475     | 0.305                             | 7.729      | 8.295      | 8.444      | 8.635  | 9.546                   |         |
| RAB11F1P5 | EJRH6KAvkrq_pKISk4 | rs1046183  | 6.91             | 6.60                      | -0.131     | 1.34             | 1.31          | 0.1475 | 8.475     | 0.305                             | 7.729      | 8.295      | 8.444      | 8.635  | 9.546                   |         |
| RAB11F1P5 | EJRH6KAvkrq_pKISk4 | rs1430350  | 5.18             | 4.95                      | 0.101      | 1.73             | -10.26        | 0.215  | 8.475     | 0.305                             | 7.729      | 8.295      | 8.444      | 8.635  | 9.546                   |         |
| RAB11F1P5 | EJRH6KAvkrq_pKISk4 | rs1430351  | 5.18             | 4.95                      | 0.101      | 1.73             | -9.19         | 0.2136 | 8.475     | 0.305                             | 7.729      | 8.295      | 8.444      | 8.635  | 9.546                   |         |
| RAB11F1P5 | EJRH6KAvkrq_pKISk4 | rs6725882  | 3.44             | 3.30                      | -0.064     | 0.81             | 5.75          | 0.3106 | 8.475     | 0.305                             | 7.729      | 8.295      | 8.444      | 8.635  | 9.546                   |         |
| RAB14     | 0SISAPu1SCjtlD7hyk | rs12552499 | 5.73             | 5.48                      | -0.114     | 2.63             | -42.92        | 0.1275 | 7.204     | 0.08                              | 7.098      | 7.138      | 7.179      | 7.255  | 7.46                    |         |
| RAB14     | 0SISAPu1SCjtlD7hyk | rs2146836  | 3.55             | 3.40                      | -0.068     | 1.65             | -10.12        | 0.32   | 7.204     | 0.08                              | 7.098      | 7.138      | 7.179      | 7.255  | 7.46                    |         |
| RAB14     | 0SISAPu1SCjtlD7hyk | rs3789311  | 7.09             | 6.77                      | 0.145      | 3.93             | -1.42         | 0.1575 | 7.204     | 0.08                              | 7.098      | 7.138      | 7.179      | 7.255  | 7.46                    |         |
| RAB14     | 0SISAPu1SCjtlD7hyk | rs942152   | 3.67             | 3.51                      | -0.071     | 2.42             | 11.27         | 0.44   | 7.204     | 0.08                              | 7.098      | 7.138      | 7.179      | 7.255  | 7.46                    |         |
| RAB15     | olc1EKIOHqAKzqJIKI | rs1951488  | 3.45             | 3.30                      | 0.064      | 0.23             | -40.32        | 0.2475 | 7.809     | 0.257                             | 7.295      | 7.635      | 7.764      | 7.97   | 8.645                   |         |
| RAB15     | olc1EKIOHqAKzqJIKI | rs7143432  | 3.96             | 3.80                      | 0.076      | 0.26             | -33.39        | 0.2025 | 7.809     | 0.257                             | 7.295      | 7.635      | 7.764      | 7.97   | 8.645                   |         |
| RAB15     | olc1EKIOHqAKzqJIKI | rs4902336  | 3.82             | 3.66                      | 0.073      | 0.26             | -25.27        | 0.205  | 7.809     | 0.257                             | 7.295      | 7.635      | 7.764      | 7.97   | 8.645                   |         |
| RAB23     | Nk64nXndMKOIAIXwgo | rs7756421  | 5.39             | 5.16                      | 0.103      | 2.73             | -19.57        | 0.16   | 7.41      | 0.123                             | 7.177      | 7.337      | 7.4        | 7.472  | 8.313                   |         |
| RAB23     | Nk64nXndMKOIAIXwgo | rs11398    | 5.71             | 5.45                      | -0.108     | 1.58             | 0.37          | 0.17   | 7.41      | 0.123                             | 7.177      | 7.337      | 7.4        | 7.472  | 8.313                   |         |
| RAB23     | Nk64nXndMKOIAIXwgo | rs7744316  | 3.94             | 3.78                      | 0.072      | 2.13             | -5.2          | 0.21   | 7.41      | 0.123                             | 7.177      | 7.337      | 7.4        | 7.472  | 8.313                   |         |
| RAB34     | In4VehP5Hh.NSFaieU | rs9900141  | 4.87             | 4.66                      | -0.096     | 1.17             | 48.66         | 0.2525 | 7.9       | 0.365                             | 7.24       | 7.651      | 7.884      | 8.077  | 9.585                   |         |
| RAB3IP    | HoHeOd5uoU5eB1WDB4 | rs775466   | 4.17             | 3.99                      | -0.081     | 0.78             | -31.62        | 0.26   | 9.422     | 0.346                             | 8.71       | 9.162      | 9.406      | 9.627  | 10.456                  |         |
| RAB3IP    | HoHeOd5uoU5eB1WDB4 | rs17225596 | 5.69             | 5.44                      | -0.109     | 1.48             | -25.81        | 0.2261 | 9.422     | 0.346                             | 8.71       | 9.162      | 9.406      | 9.627  | 10.456                  |         |
| RAB3IP    | HoHeOd5uoU5eB1WDB4 | rs775450   | 7.26             | 6.93                      | -0.14      | 1.48             | -15.4         | 0.3317 | 9.422     | 0.346                             | 8.71       | 9.162      | 9.406      | 9.627  | 10.456                  |         |
| RAB3IP    | HoHeOd5uoU5eB1WDB4 | rs775448   | 7.6              | 7.26                      | 0.146      | 1.48             | -15.23        | 0.335  | 9.422     | 0.346                             | 8.71       | 9.162      | 9.406      | 9.627  | 10.456                  |         |
| RAB3IP    | HoHeOd5uoU5eB1WDB4 | rs4258420  | 7.6              | 7.26                      | 0.146      | 1.48             | 26.91         | 0.335  | 9.422     | 0.346                             | 8.71       | 9.162      | 9.406      | 9.627  | 10.456                  |         |
| RAB3IP    | HoHeOd5uoU5eB1WDB4 | rs7305307  | 7.31             | 6.98                      | 0.14       | 1.48             | 26.22         | 0.3225 | 9.422     | 0.346                             | 8.71       | 9.162      | 9.406      | 9.627  | 10.456                  |         |
| RAB3IP    | HoHeOd5uoU5eB1WDB4 | rs1240265  | 6.4              | 6.11                      | -0.127     | 0.24             | 28.99         | 0.4725 | 9.422     | 0.346                             | 8.71       | 9.162      | 9.406      | 9.627  | 10.456                  |         |
| RABAC1    | 9p3p7f.aZe8T3c3mRc | rs1864207  | 3.43             | 3.29                      | 0.064      | 0.2              | -32.07        | 0.3525 | 11.074    | 0.392                             | 7.898      | 10.875     | 11.13      | 11.353 | 11.887                  |         |
| RABEP1    | WJ0vq.Ri717nzPS3uU | rs6502851  | 3.92             | 3.75                      | -0.078     | 3.32             | -34.93        | 0.202  | 9.743     | 0.305                             | 7.59       | 9.577      | 9.755      | 9.936  | 10.63                   |         |
| RABEP1    | WJ0vq.Ri717nzPS3uU | rs9914449  | 7.32             | 6.99                      | -0.146     | 2.55             | -32.14        | 0.3525 | 9.743     | 0.305                             | 7.59       | 9.577      | 9.755      | 9.936  | 10.63                   |         |
| RABEP1    | WJ0vq.Ri717nzPS3uU | rs7212681  | 16.91            | 16.12                     | -0.326     | 7.46             | 5.94          | 0.4975 | 9.743     | 0.305                             | 7.59       | 9.577      | 9.755      | 9.936  | 10.63                   |         |
| RABEP1    | WJ0vq.Ri717nzPS3uU | rs2251155  | 16.91            | 16.12                     | -0.326     | 7.46             | 13.52         | 0.4975 | 9.743     | 0.305                             | 7.59       | 9.577      | 9.755      | 9.936  | 10.63                   |         |
| RABEP1    | WJ0vq.Ri717nzPS3uU | rs16954515 | 4.62             | 4.42                      | 0.091      | 4.7              | 17.38         | 0.2175 | 9.743     | 0.305                             | 7.59       | 9.577      | 9.755      | 9.936  | 10.63                   |         |
| RABEP1    | WJ0vq.Ri717nzPS3uU | rs1046368  | 3.69             | 3.53                      | -0.072     | 5.83             | 19.14         | 0.1625 | 9.743     | 0.305                             | 7.59       | 9.577      | 9.755      | 9.936  | 10.63                   |         |
| RABEP1    | WJ0vq.Ri717nzPS3uU | rs6502860  | 16.83            | 16.05                     | -0.326     | 7.88             | 51.43         | 0.4975 | 9.743     | 0.305                             | 7.59       | 9.577      | 9.755      | 9.936  | 10.63                   |         |
| RABEP1    | WJ0vq.Ri717nzPS3uU | rs2987     | 4.03             | 3.86                      | 0.078      | 1.19             | -45.29        | 0.25   | 9.743     | 0.305                             | 7.59       | 9.577      | 9.755      | 9.936  | 10.63                   |         |
| RABEP1    | WJ0vq.Ri717nzPS3uU | rs11871517 | 10.4             | 9.93                      | -0.208     | 5.6              | -39.13        | 0.4125 | 9.743     | 0.305                             | 7.59       | 9.577      | 9.755      | 9.936  | 10.63                   |         |
| RABEP1    | WJ0vq.Ri717nzPS3uU | rs11867190 | 9                | 8.60                      | -0.182     | 5.1              | -27.91        | 0.395  | 9.743     | 0.305                             | 7.59       | 9.577      | 9.755      | 9.936  | 10.63                   |         |
| RABEP1    | WJ0vq.Ri717nzPS3uU | rs11078559 | 17.8             | 16.97                     | 0.34       | 7.77             | -26.38        | 0.495  | 9.743     | 0.305                             | 7.59       | 9.577      | 9.755      | 9.936  | 10.63                   |         |
| RABEP1    | WJ0vq.Ri717nzPS3uU | rs1000940  | 9.47             | 9.04                      | 0.196      | 5.98             | -5.88         | 0.3175 | 9.743     | 0.305                             | 7.59       | 9.577      | 9.755      | 9.936  | 10.63                   |         |
| RABEP1    | WJ0vq.Ri717nzPS3uU | rs1065483  | 18.49            | 17.62                     | -0.345     | 8.08             | -4.36         | 0.4125 | 9.743     | 0.305                             | 7.59       | 9.577      | 9.755      | 9.936  | 10.63                   |         |
| RABEP1    | WJ0vq.Ri717nzPS3uU | rs2301739  | 3.39             | 3.24                      | 0.065      | 3.36             | 19.25         | 0.19   | 9.743     | 0.305                             | 7.59       | 9.577      | 9.755      | 9.936  | 10.63                   |         |
| RABEP1    | WJ0vq.Ri717nzPS3uU | rs2301740  | 14.76            | 14.08                     | -0.287     | 6.96             | 30.49         | 0.3875 | 9.743     | 0.305                             | 7.59       | 9.577      | 9.755      | 9.936  | 10.63                   |         |
| RABEP1    | WJ0vq.Ri717nzPS3uU | rs8074617  | 11.94            | 11.39                     | 0.247      | 4.12             | 34.86         | 0.3075 | 9.743     | 0.305                             | 7.59       | 9.577      | 9.755      | 9.936  | 10.63                   |         |

| Symbol   | Lumi nuID          | SNP        | Population-based | Population-based          | % Variance | Family-based     | Distance from | MAF    | Mean      | Transcript abundance (log2 scale) |             |                 |            |         | SNP mapping under probe |        |
|----------|--------------------|------------|------------------|---------------------------|------------|------------------|---------------|--------|-----------|-----------------------------------|-------------|-----------------|------------|---------|-------------------------|--------|
|          |                    |            | association      | association               |            |                  |               |        |           | explained                         | association | transcript (kb) | Standard   | 25th    |                         | Median |
|          |                    |            | p-value (-log10) | p-value (-log10), GC adj. | Explained  | p-value (-log10) |               |        | Deviation | Minimum                           | percentile  | Median          | percentile | Maximum |                         |        |
| RABEP1   | WJ0vq.Ri717nzPS3uU | rs4790770  | 11.94            | 11.39                     | 0.247      | 3.95             | 35.76         | 0.3075 | 9.743     | 0.305                             | 7.59        | 9.577           | 9.755      | 9.936   | 10.63                   |        |
| RABGEF1  | 9vR4tJ69UJ2RIK4wvE | rs10499785 | 15.29            | 14.58                     | 0.287      | 2.85             | -22.33        | 0.05   | 9.445     | 0.173                             | 8.931       | 9.341           | 9.452      | 9.567   | 9.771                   |        |
| RABGEF1  | 9vR4tJ69UJ2RIK4wvE | rs2077180  | 3.81             | 3.65                      | -0.071     | 2.12             | -11.01        | 0.154  | 9.445     | 0.173                             | 8.931       | 9.341           | 9.452      | 9.567   | 9.771                   |        |
| RAD51C   | ur4yLrIX5x5eT0kX0k | rs12946522 | 3.33             | 3.19                      | -0.06      | 1.8              | -1.86         | 0.2    | 8.375     | 0.242                             | 7.125       | 8.241           | 8.389      | 8.518   | 8.875                   |        |
| RAD51L1  | xokKvuC3t6VNA4UOn8 | rs4902613  | 4.29             | 4.11                      | 0.083      | 2.9              | 12.07         | 0.1475 | 7.21      | 0.062                             | 7.121       | 7.168           | 7.198      | 7.232   | 7.482                   |        |
| RAD51L1  | xokKvuC3t6VNA4UOn8 | rs17106012 | 5.94             | 5.68                      | -0.118     | 4.14             | 14.84         | 0.135  | 7.21      | 0.062                             | 7.121       | 7.168           | 7.198      | 7.232   | 7.482                   |        |
| RAD51L1  | xokKvuC3t6VNA4UOn8 | rs17834971 | 4.64             | 4.44                      | -0.091     | 3.63             | 15.07         | 0.1675 | 7.21      | 0.062                             | 7.121       | 7.168           | 7.198      | 7.232   | 7.482                   |        |
| RAD51L1  | xokKvuC3t6VNA4UOn8 | rs4902619  | 6.05             | 5.78                      | 0.12       | 3.92             | 29.07         | 0.1375 | 7.21      | 0.062                             | 7.121       | 7.168           | 7.198      | 7.232   | 7.482                   |        |
| RAD54B   | Npl0sJct.uqS_2F0UI | rs10956911 | 15.45            | 14.73                     | -0.289     | 5.01             | -0.31         | 0.3325 | 7.717     | 0.201                             | 7.233       | 7.567           | 7.72       | 7.853   | 8.312                   |        |
| RAD54B   | Npl0sJct.uqS_2F0UI | rs3019146  | 13.19            | 12.58                     | 0.257      | 3.98             | 29.92         | 0.3775 | 7.717     | 0.201                             | 7.233       | 7.567           | 7.72       | 7.853   | 8.312                   |        |
| RAD54B   | Npl0sJct.uqS_2F0UI | rs2246066  | 8.83             | 8.43                      | 0.179      | 2.22             | 34.97         | 0.4041 | 7.717     | 0.201                             | 7.233       | 7.567           | 7.72       | 7.853   | 8.312                   |        |
| RAD54B   | Npl0sJct.uqS_2F0UI | rs2930961  | 17.23            | 16.42                     | -0.323     | 4.99             | -43.5         | 0.35   | 7.717     | 0.201                             | 7.233       | 7.567           | 7.72       | 7.853   | 8.312                   |        |
| RAD54B   | Npl0sJct.uqS_2F0UI | rs935052   | 8.67             | 8.28                      | -0.172     | 2.56             | -25.36        | 0.43   | 7.717     | 0.201                             | 7.233       | 7.567           | 7.72       | 7.853   | 8.312                   |        |
| RAD54B   | Npl0sJct.uqS_2F0UI | rs3099407  | 6.29             | 6.01                      | 0.124      | 2.25             | 17.99         | 0.4397 | 7.717     | 0.201                             | 7.233       | 7.567           | 7.72       | 7.853   | 8.312                   |        |
| RAD54B   | Npl0sJct.uqS_2F0UI | rs3099412  | 6.03             | 5.76                      | 0.12       | 2.27             | 36.9          | 0.4365 | 7.717     | 0.201                             | 7.233       | 7.567           | 7.72       | 7.853   | 8.312                   |        |
| RALBP1   | uih0ksUFMNOJ3qMh60 | rs12970514 | 3.33             | 3.19                      | -0.066     | 1.55             | 47.23         | 0.175  | 9.45      | 0.254                             | 7.951       | 9.282           | 9.454      | 9.629   | 10.059                  |        |
| RALGPS1  | TbdFZLBR4GONJXU6r0 | rs10819243 | 4.07             | 3.90                      | 0.076      | 1.95             | -43.73        | 0.3725 | 7.878     | 0.266                             | 7.183       | 7.729           | 7.832      | 8.005   | 9.259                   |        |
| RALGPS1  | TbdFZLBR4GONJXU6r0 | rs561041   | 3.81             | 3.65                      | -0.072     | 2.56             | -18.38        | 0.245  | 7.878     | 0.266                             | 7.183       | 7.729           | 7.832      | 8.005   | 9.259                   |        |
| RALGPS1  | TbdFZLBR4GONJXU6r0 | rs671261   | 4.25             | 4.06                      | -0.081     | 2.99             | -17.14        | 0.25   | 7.878     | 0.266                             | 7.183       | 7.729           | 7.832      | 8.005   | 9.259                   |        |
| RALGPS1  | TbdFZLBR4GONJXU6r0 | rs7859816  | 4.74             | 4.53                      | -0.092     | 2.67             | -7.5          | 0.27   | 7.878     | 0.266                             | 7.183       | 7.729           | 7.832      | 8.005   | 9.259                   |        |
| RALGPS1  | TbdFZLBR4GONJXU6r0 | rs670410   | 4.35             | 4.16                      | 0.083      | 2.94             | 23.48         | 0.245  | 7.878     | 0.266                             | 7.183       | 7.729           | 7.832      | 8.005   | 9.259                   |        |
| RALGPS1  | TbdFZLBR4GONJXU6r0 | rs518116   | 4.35             | 4.16                      | -0.083     | 2.94             | 38.68         | 0.245  | 7.878     | 0.266                             | 7.183       | 7.729           | 7.832      | 8.005   | 9.259                   |        |
| RALGPS1  | TbdFZLBR4GONJXU6r0 | rs3120028  | 4.35             | 4.16                      | -0.083     | 2.94             | 49.81         | 0.245  | 7.878     | 0.266                             | 7.183       | 7.729           | 7.832      | 8.005   | 9.259                   |        |
| RALGPS1  | TbdFZLBR4GONJXU6r0 | rs11790388 | 3.48             | 3.33                      | 0.066      | 1.3              | 63.23         | 0.1375 | 7.878     | 0.266                             | 7.183       | 7.729           | 7.832      | 8.005   | 9.259                   |        |
| RALGPS1  | TbdFZLBR4GONJXU6r0 | rs7040080  | 3.34             | 3.20                      | -0.062     | 1.86             | 64.99         | 0.5    | 7.878     | 0.266                             | 7.183       | 7.729           | 7.832      | 8.005   | 9.259                   |        |
| RALGPS1  | TbdFZLBR4GONJXU6r0 | rs7022033  | 3.92             | 3.76                      | 0.075      | 3.01             | 90.47         | 0.2475 | 7.878     | 0.266                             | 7.183       | 7.729           | 7.832      | 8.005   | 9.259                   |        |
| RALGPS1  | TbdFZLBR4GONJXU6r0 | rs1536705  | 3.35             | 3.21                      | 0.061      | 1.86             | 94.82         | 0.5    | 7.878     | 0.266                             | 7.183       | 7.729           | 7.832      | 8.005   | 9.259                   |        |
| RALGPS1  | TbdFZLBR4GONJXU6r0 | rs2297866  | 3.34             | 3.20                      | 0.061      | 1.86             | -131.24       | 0.495  | 7.878     | 0.266                             | 7.183       | 7.729           | 7.832      | 8.005   | 9.259                   |        |
| RALGPS1  | TbdFZLBR4GONJXU6r0 | rs13298677 | 3.48             | 3.33                      | 0.066      | 1.3              | -122.45       | 0.1375 | 7.878     | 0.266                             | 7.183       | 7.729           | 7.832      | 8.005   | 9.259                   |        |
| RALGPS1  | TbdFZLBR4GONJXU6r0 | rs2789507  | 3.33             | 3.19                      | -0.06      | 2.29             | -74.68        | 0.475  | 7.878     | 0.266                             | 7.183       | 7.729           | 7.832      | 8.005   | 9.259                   |        |
| RALGPS1  | TbdFZLBR4GONJXU6r0 | rs3739554  | 3.44             | 3.29                      | 0.064      | 1.5              | -44.8         | 0.1475 | 7.878     | 0.266                             | 7.183       | 7.729           | 7.832      | 8.005   | 9.259                   |        |
| RALGPS1  | TbdFZLBR4GONJXU6r0 | rs2151272  | 4.38             | 4.20                      | -0.084     | 1.34             | -36.67        | 0.25   | 7.878     | 0.266                             | 7.183       | 7.729           | 7.832      | 8.005   | 9.259                   |        |
| RALGPS1  | TbdFZLBR4GONJXU6r0 | rs1890546  | 3.66             | 3.51                      | -0.067     | 1.66             | -33.3         | 0.5    | 7.878     | 0.266                             | 7.183       | 7.729           | 7.832      | 8.005   | 9.259                   |        |
| RAP1A    | QrjxXuzCLO7dHkX0Ok | rs2800881  | 5.73             | 5.48                      | 0.112      | 1                | -28.5         | 0.3894 | 7.741     | 0.372                             | 7.128       | 7.473           | 7.729      | 7.94    | 8.951                   |        |
| RAP1A    | QrjxXuzCLO7dHkX0Ok | rs2786991  | 3.95             | 3.79                      | -0.075     | 1.67             | -14.84        | 0.425  | 7.741     | 0.372                             | 7.128       | 7.473           | 7.729      | 7.94    | 8.951                   |        |
| RAP1A    | QrjxXuzCLO7dHkX0Ok | rs4839154  | 3.64             | 3.49                      | 0.069      | 1.81             | -5.44         | 0.2275 | 7.741     | 0.372                             | 7.128       | 7.473           | 7.729      | 7.94    | 8.951                   |        |
| RAP1A    | QrjxXuzCLO7dHkX0Ok | rs10489469 | 4.15             | 3.97                      | -0.079     | 1.58             | -22.02        | 0.185  | 7.741     | 0.372                             | 7.128       | 7.473           | 7.729      | 7.94    | 8.951                   |        |
| RAP1A    | QrjxXuzCLO7dHkX0Ok | rs3767595  | 4.44             | 4.25                      | -0.085     | 1.49             | -11.47        | 0.1875 | 7.741     | 0.372                             | 7.128       | 7.473           | 7.729      | 7.94    | 8.951                   |        |
| RAPGEF6  | 695J0XVUTdMkUr7t4U | rs31251    | 4.11             | 3.94                      | -0.08      | 4.28             | 72.34         | 0.4369 | 10.91     | 0.556                             | 9.432       | 10.573          | 10.862     | 11.272  | 13.31                   |        |
| RASA1    | uAeVH2_fniHdqUppr8 | rs16902601 | 3.62             | 3.47                      | -0.071     | 0.2              | -24.89        | 0.2225 | 7.128     | 0.026                             | 7.1         | 7.112           | 7.121      | 7.136   | 7.316                   | Yes    |
| RASA1    | uAeVH2_fniHdqUppr8 | rs10942498 | 3.9              | 3.73                      | 0.077      | 0.01             | -23.84        | 0.23   | 7.128     | 0.026                             | 7.1         | 7.112           | 7.121      | 7.136   | 7.316                   | Yes    |
| RASGEF1A | 6ITi3rXq6JKDL1Hs_0 | rs2503846  | 3.29             | 3.15                      | -0.062     | 2.21             | -31.57        | 0.27   | 7.493     | 0.18                              | 7.135       | 7.373           | 7.478      | 7.616   | 8.206                   |        |
| RASGRP2  | ljel_VeLUajvToCShI | rs2052482  | 3.48             | 3.33                      | 0.067      | 1.04             | 26.03         | 0.2275 | 7.247     | 0.079                             | 7.127       | 7.184           | 7.23       | 7.304   | 7.453                   |        |
| RASGRP3  | cgbIN7AkdIKSU1cjvo | rs7603061  | 3.35             | 3.21                      | 0.064      | 2.52             | 9.59          | 0.3375 | 7.896     | 0.252                             | 7.228       | 7.715           | 7.887      | 8.07    | 8.673                   |        |
| RASGRP3  | cgbIN7AkdIKSU1cjvo | rs2124437  | 8.76             | 8.36                      | 0.178      | 4.21             | 21.32         | 0.3575 | 7.896     | 0.252                             | 7.228       | 7.715           | 7.887      | 8.07    | 8.673                   |        |
| RASGRP3  | cgbIN7AkdIKSU1cjvo | rs10189117 | 3.36             | 3.22                      | 0.066      | 0.96             | 27.23         | 0.1718 | 7.896     | 0.252                             | 7.228       | 7.715           | 7.887      | 8.07    | 8.673                   |        |
| RASGRP3  | cgbIN7AkdIKSU1cjvo | rs13398130 | 3.55             | 3.40                      | -0.067     | 1.16             | 27.74         | 0.1825 | 7.896     | 0.252                             | 7.228       | 7.715           | 7.887      | 8.07    | 8.673                   |        |
| RASGRP3  | cgbIN7AkdIKSU1cjvo | rs2054133  | 8.13             | 7.77                      | -0.166     | 5.09             | 30.39         | 0.4775 | 7.896     | 0.252                             | 7.228       | 7.715           | 7.887      | 8.07    | 8.673                   |        |
| RASGRP3  | cgbIN7AkdIKSU1cjvo | rs13408995 | 4.6              | 4.40                      | 0.094      | 4.21             | 30.69         | 0.3525 | 7.896     | 0.252                             | 7.228       | 7.715           | 7.887      | 8.07    | 8.673                   |        |
| RASGRP3  | cgbIN7AkdIKSU1cjvo | rs10191627 | 4.82             | 4.61                      | 0.096      | 1.61             | 33.44         | 0.2107 | 7.896     | 0.252                             | 7.228       | 7.715           | 7.887      | 8.07    | 8.673                   |        |
| RASGRP3  | cgbIN7AkdIKSU1cjvo | rs2887087  | 9.68             | 9.24                      | -0.198     | 4.77             | 33.66         | 0.4362 | 7.896     | 0.252                             | 7.228       | 7.715           | 7.887      | 8.07    | 8.673                   |        |
| RASGRP3  | cgbIN7AkdIKSU1cjvo | rs11124321 | 5.9              | 5.64                      | -0.126     | 4.35             | 39.99         | 0.3945 | 7.896     | 0.252                             | 7.228       | 7.715           | 7.887      | 8.07    | 8.673                   |        |
| RASGRP3  | cgbIN7AkdIKSU1cjvo | rs17594260 | 6.73             | 6.43                      | -0.137     | 2.4              | 40.22         | 0.1244 | 7.896     | 0.252                             | 7.228       | 7.715           | 7.887      | 8.07    | 8.673                   |        |
| RASGRP3  | cgbIN7AkdIKSU1cjvo | rs2367735  | 3.63             | 3.48                      | 0.075      | 3.27             | 41.26         | 0.4799 | 7.896     | 0.252                             | 7.228       | 7.715           | 7.887      | 8.07    | 8.673                   |        |
| RASGRP3  | cgbIN7AkdIKSU1cjvo | rs13031142 | 5.71             | 5.46                      | -0.117     | 2                | 42.51         | 0.435  | 7.896     | 0.252                             | 7.228       | 7.715           | 7.887      | 8.07    | 8.673                   |        |
| RBL2     | iVT2u65LuALX4_9q7k | rs8056923  | 3.54             | 3.39                      | -0.066     | 1.52             | -31.2         | 0.47   | 11.706    | 0.473                             | 9.438       | 11.516          | 11.8       | 11.974  | 12.798                  |        |
| RBL2     | iVT2u65LuALX4_9q7k | rs9921587  | 4.52             | 4.33                      | -0.086     | 1.99             | 7.25          | 0.49   | 11.706    | 0.473                             | 9.438       | 11.516          | 11.8       | 11.974  | 12.798                  |        |
| RBL2     | iVT2u65LuALX4_9q7k | rs8043918  | 5.05             | 4.83                      | -0.097     | 1.94             | -12.53        | 0.49   | 11.706    | 0.473                             | 9.438       | 11.516          | 11.8       | 11.974  | 12.798                  |        |
| RBL2     | iVT2u65LuALX4_9q7k | rs7189819  | 5.12             | 4.90                      | -0.098     | 3.03             | 10.79         | 0.345  | 11.706    | 0.473                             | 9.438       | 11.516          | 11.8       | 11.974  | 12.798                  |        |
| RBL2     | iVT2u65LuALX4_9q7k | rs3095571  | 3.35             | 3.21                      | 0.062      | 2.41             | 19.43         | 0.47   | 11.706    | 0.473                             | 9.438       | 11.516          | 11.8       | 11.974  | 12.798                  |        |
| RBL2     | iVT2u65LuALX4_9q7k | rs17194040 | 3.79             | 3.62                      | 0.069      | 2.77             | 25.34         | 0.3075 | 11.706    | 0.473                             | 9.438       | 11.516          | 11.8       | 11.974  | 12.798                  |        |
| RBM11    | Wp6j0O6Lro.XglCy5l | rs374916   | 3.62             | 3.46                      | -0.07      | 1.7              | -38.04        | 0.2601 | 7.538     | 0.189                             | 7.171       | 7.407           | 7.529      | 7.638   | 8.17                    |        |

| Symbol | Lumi nuID          | SNP        | Population-based             | Population-based                      | % Variance Explained | Family-based                 | Distance from transcript (kb) | MAF    | Mean   | Transcript abundance (log2 scale) |         |                 |        |                 | SNP mapping under probe |
|--------|--------------------|------------|------------------------------|---------------------------------------|----------------------|------------------------------|-------------------------------|--------|--------|-----------------------------------|---------|-----------------|--------|-----------------|-------------------------|
|        |                    |            | association p-value (-log10) | association p-value (-log10), GC adj. |                      | association p-value (-log10) |                               |        |        | Standard Deviation                | Minimum | 25th percentile | Median | 75th percentile |                         |
| RBM11  | Wp6j0O6Lro.XglCy5l | rs434247   | 3.71                         | 3.55                                  | 0.071                | 2.25                         | -11.94                        | 0.2325 | 7.538  | 0.189                             | 7.171   | 7.407           | 7.529  | 7.638           | 8.17                    |
| RBM11  | Wp6j0O6Lro.XglCy5l | rs447455   | 3.49                         | 3.34                                  | 0.067                | 1.56                         | -7.65                         | 0.255  | 7.538  | 0.189                             | 7.171   | 7.407           | 7.529  | 7.638           | 8.17                    |
| RBM11  | Wp6j0O6Lro.XglCy5l | rs389468   | 4                            | 3.83                                  | -0.076               | 2.33                         | 5.99                          | 0.105  | 7.538  | 0.189                             | 7.171   | 7.407           | 7.529  | 7.638           | 8.17                    |
| RBM11  | Wp6j0O6Lro.XglCy5l | rs409782   | 4.85                         | 4.64                                  | -0.093               | 2.44                         | -3.91                         | 0.1625 | 7.538  | 0.189                             | 7.171   | 7.407           | 7.529  | 7.638           | 8.17                    |
| RBM11  | Wp6j0O6Lro.XglCy5l | rs433899   | 6.35                         | 6.07                                  | 0.129                | 3.27                         | 2.91                          | 0.375  | 7.538  | 0.189                             | 7.171   | 7.407           | 7.529  | 7.638           | 8.17                    |
| RBM11  | Wp6j0O6Lro.XglCy5l | rs2041610  | 3.52                         | 3.37                                  | -0.067               | 1.58                         | 9.75                          | 0.1884 | 7.538  | 0.189                             | 7.171   | 7.407           | 7.529  | 7.638           | 8.17                    |
| RBM43  | 9uJenHgHn57BelUv_0 | rs289903   | 4.33                         | 4.14                                  | -0.079               | 1.1                          | -21.2                         | 0.455  | 7.295  | 0.155                             | 7.115   | 7.174           | 7.256  | 7.377           | 7.84                    |
| RBM43  | 9uJenHgHn57BelUv_0 | rs2218880  | 4.58                         | 4.38                                  | 0.084                | 1.06                         | -6.03                         | 0.435  | 7.295  | 0.155                             | 7.115   | 7.174           | 7.256  | 7.377           | 7.84                    |
| RBM43  | 9uJenHgHn57BelUv_0 | rs2271811  | 4.37                         | 4.18                                  | 0.08                 | 0.89                         | -0.6                          | 0.4325 | 7.295  | 0.155                             | 7.115   | 7.174           | 7.256  | 7.377           | 7.84                    |
| RBM43  | 9uJenHgHn57BelUv_0 | rs6433327  | 4.73                         | 4.53                                  | -0.086               | 1.22                         | 36.35                         | 0.455  | 7.295  | 0.155                             | 7.115   | 7.174           | 7.256  | 7.377           | 7.84                    |
| RBM43  | 9uJenHgHn57BelUv_0 | rs6726634  | 5.1                          | 4.87                                  | 0.093                | 1.16                         | 41.5                          | 0.47   | 7.295  | 0.155                             | 7.115   | 7.174           | 7.256  | 7.377           | 7.84                    |
| RBM6   | 0qVS76JdKCBSQCEtQY | rs2230590  | 4.49                         | 4.29                                  | 0.081                | 1.11                         | -41.49                        | 0.4725 | 9.827  | 0.438                             | 8.541   | 9.571           | 9.83   | 10.09           | 11.58                   |
| RBM6   | 0qVS76JdKCBSQCEtQY | rs4688758  | 4.96                         | 4.74                                  | 0.09                 | 1.27                         | 50.79                         | 0.465  | 9.827  | 0.438                             | 8.541   | 9.571           | 9.83   | 10.09           | 11.58                   |
| RBM6   | 0qVS76JdKCBSQCEtQY | rs6765484  | 4.96                         | 4.74                                  | 0.09                 | 1.3                          | 63.72                         | 0.465  | 9.827  | 0.438                             | 8.541   | 9.571           | 9.83   | 10.09           | 11.58                   |
| RBM6   | 0qVS76JdKCBSQCEtQY | rs2526748  | 4.96                         | 4.74                                  | 0.09                 | 0.98                         | -34.24                        | 0.465  | 9.827  | 0.438                             | 8.541   | 9.571           | 9.83   | 10.09           | 11.58                   |
| RBMS1  | cSOXxSxlFzxvSzeQk  | rs1020732  | 3.68                         | 3.52                                  | -0.07                | 4.68                         | 13.73                         | 0.435  | 8.054  | 0.369                             | 7.109   | 7.828           | 8.039  | 8.271           | 9.083                   |
| RBMS2  | BSAnuuegTY4KJXHx4k | rs941208   | 3.4                          | 3.26                                  | -0.063               | 0.72                         | -0.36                         | 0.335  | 7.233  | 0.122                             | 7.125   | 7.166           | 7.203  | 7.26            | 8.341                   |
| RBMS2  | BSAnuuegTY4KJXHx4k | rs10450    | 3.35                         | 3.21                                  | -0.062               | 0.87                         | 1                             | 0.2725 | 7.233  | 0.122                             | 7.125   | 7.166           | 7.203  | 7.26            | 8.341                   |
| RBP1   | rS4nqGiEJ1Lu5lKull | rs12493507 | 3.36                         | 3.22                                  | 0.066                | 0.3                          | 3.13                          | 0.115  | 7.113  | 0.01                              | 7.096   | 7.106           | 7.111  | 7.119           | 7.173                   |
| RBPMS2 | rpT9lfq4pp77T5414  | rs1008917  | 3.43                         | 3.29                                  | 0.068                | 1.11                         | -8.12                         | 0.1325 | 7.276  | 0.296                             | 7.101   | 7.127           | 7.152  | 7.288           | 9.048                   |
| RBPMS2 | rpT9lfq4pp77T5414  | rs7174486  | 9.37                         | 8.96                                  | 0.198                | 1.71                         | 10.12                         | 0.0675 | 7.276  | 0.296                             | 7.101   | 7.127           | 7.152  | 7.288           | 9.048                   |
| RC3H1  | 3wEDq66q6gqwxLXlPK | rs1951626  | 3.41                         | 3.24                                  | 0.066                | 1.28                         | -13.82                        | 0.3125 | 7.227  | 0.082                             | 7.108   | 7.175           | 7.212  | 7.256           | 7.628                   |
| RCCD1  | x7K7u7e6.JA79UVQq0 | rs7183098  | 8.83                         | 8.43                                  | 0.175                | 0.79                         | -45.81                        | 0.2725 | 8.232  | 0.3                               | 7.663   | 8.029           | 8.202  | 8.366           | 9.337                   |
| RCCD1  | x7K7u7e6.JA79UVQq0 | rs2106673  | 9.24                         | 8.82                                  | 0.185                | 0.87                         | -45.51                        | 0.2825 | 8.232  | 0.3                               | 7.663   | 8.029           | 8.202  | 8.366           | 9.337                   |
| RCCD1  | x7K7u7e6.JA79UVQq0 | rs1266492  | 9.08                         | 8.66                                  | -0.182               | 0.82                         | -42                           | 0.2725 | 8.232  | 0.3                               | 7.663   | 8.029           | 8.202  | 8.366           | 9.337                   |
| RCCD1  | x7K7u7e6.JA79UVQq0 | rs11073961 | 12.59                        | 12.01                                 | 0.243                | 1.51                         | -14.71                        | 0.26   | 8.232  | 0.3                               | 7.663   | 8.029           | 8.202  | 8.366           | 9.337                   |
| RCCD1  | x7K7u7e6.JA79UVQq0 | rs2001217  | 6.99                         | 6.68                                  | 0.139                | 1.28                         | 0.14                          | 0.4125 | 8.232  | 0.3                               | 7.663   | 8.029           | 8.202  | 8.366           | 9.337                   |
| RCCD1  | x7K7u7e6.JA79UVQq0 | rs7601     | 6.46                         | 6.17                                  | -0.122               | 1.42                         | 3.24                          | 0.3075 | 8.232  | 0.3                               | 7.663   | 8.029           | 8.202  | 8.366           | 9.337                   |
| RCCD1  | x7K7u7e6.JA79UVQq0 | rs2290202  | 15.68                        | 14.95                                 | 0.292                | 1.17                         | 5.91                          | 0.13   | 8.232  | 0.3                               | 7.663   | 8.029           | 8.202  | 8.366           | 9.337                   |
| RCCD1  | x7K7u7e6.JA79UVQq0 | rs8042680  | 6.89                         | 6.58                                  | -0.134               | 1.29                         | 14.98                         | 0.32   | 8.232  | 0.3                               | 7.663   | 8.029           | 8.202  | 8.366           | 9.337                   |
| RCCD1  | x7K7u7e6.JA79UVQq0 | rs2301826  | 10.02                        | 9.56                                  | 0.196                | 0.91                         | 18.84                         | 0.185  | 8.232  | 0.3                               | 7.663   | 8.029           | 8.202  | 8.366           | 9.337                   |
| RCCD1  | x7K7u7e6.JA79UVQq0 | rs3803563  | 13.33                        | 12.72                                 | -0.249               | 1.36                         | 25                            | 0.1725 | 8.232  | 0.3                               | 7.663   | 8.029           | 8.202  | 8.366           | 9.337                   |
| RCCD1  | x7K7u7e6.JA79UVQq0 | rs12899811 | 5.36                         | 5.13                                  | 0.105                | 1.01                         | 37.72                         | 0.315  | 8.232  | 0.3                               | 7.663   | 8.029           | 8.202  | 8.366           | 9.337                   |
| RCCD1  | x7K7u7e6.JA79UVQq0 | rs4244883  | 4.61                         | 4.41                                  | -0.088               | 1.35                         | 40.14                         | 0.4    | 8.232  | 0.3                               | 7.663   | 8.029           | 8.202  | 8.366           | 9.337                   |
| RCCD1  | x7K7u7e6.JA79UVQq0 | rs3826033  | 18.29                        | 17.44                                 | -0.326               | 1.38                         | 42.25                         | 0.12   | 8.232  | 0.3                               | 7.663   | 8.029           | 8.202  | 8.366           | 9.337                   |
| RCHY1  | caxUq_fQs.vThG0HY4 | rs11731477 | 7.64                         | 7.30                                  | -0.161               | 2.6                          | -44.92                        | 0.2125 | 7.932  | 0.219                             | 7.152   | 7.804           | 7.944  | 8.076           | 8.464                   |
| RCHY1  | caxUq_fQs.vThG0HY4 | rs10518140 | 7.68                         | 7.33                                  | -0.163               | 2.77                         | 13.44                         | 0.2175 | 7.932  | 0.219                             | 7.152   | 7.804           | 7.944  | 8.076           | 8.464                   |
| RCHY1  | caxUq_fQs.vThG0HY4 | rs7673610  | 7.68                         | 7.33                                  | 0.163                | 2.77                         | 20.91                         | 0.2175 | 7.932  | 0.219                             | 7.152   | 7.804           | 7.944  | 8.076           | 8.464                   |
| RCHY1  | caxUq_fQs.vThG0HY4 | rs11722735 | 4.63                         | 4.43                                  | 0.093                | 2.35                         | 27.95                         | 0.3015 | 7.932  | 0.219                             | 7.152   | 7.804           | 7.944  | 8.076           | 8.464                   |
| RCHY1  | caxUq_fQs.vThG0HY4 | rs11728930 | 3.73                         | 3.57                                  | 0.073                | 1                            | 40.16                         | 0.1125 | 7.932  | 0.219                             | 7.152   | 7.804           | 7.944  | 8.076           | 8.464                   |
| RCL1   | NXui3vHvf3kKHRdfiU | rs1260073  | 3.64                         | 3.49                                  | -0.067               | 0.63                         | -0.49                         | 0.4    | 8.224  | 0.197                             | 7.463   | 8.086           | 8.233  | 8.347           | 8.627                   |
| RCL1   | NXui3vHvf3kKHRdfiU | rs10072    | 6.72                         | 6.42                                  | -0.129               | 1.43                         | -0.1                          | 0.37   | 8.224  | 0.197                             | 7.463   | 8.086           | 8.233  | 8.347           | 8.627                   |
| RCL1   | NXui3vHvf3kKHRdfiU | rs7850837  | 3.33                         | 3.19                                  | 0.063                | 1.85                         | 5.78                          | 0.4304 | 8.224  | 0.197                             | 7.463   | 8.086           | 8.233  | 8.347           | 8.627                   |
| REEP6  | HLlYnrVeU9ahd3osR8 | rs166451   | 3.42                         | 3.28                                  | -0.064               | 0.55                         | -15.77                        | 0.0553 | 7.75   | 0.232                             | 7.255   | 7.585           | 7.745  | 7.901           | 8.467                   |
| RELN   | KpXsneDnP7sHgK_R3l | rs2906634  | 3.68                         | 3.52                                  | 0.073                | 0.38                         | 46.53                         | 0.4278 | 7.117  | 0.015                             | 7.096   | 7.107           | 7.113  | 7.122           | 7.173                   |
| RELN   | KpXsneDnP7sHgK_R3l | rs2711853  | 3.53                         | 3.38                                  | 0.069                | 0.81                         | 49.05                         | 0.3615 | 7.117  | 0.015                             | 7.096   | 7.107           | 7.113  | 7.122           | 7.173                   |
| RERE   | 3leF9Ou3_CVBR2v19o | rs301819   | 3.36                         | 3.22                                  | 0.063                | 0.32                         | 89.33                         | 0.3975 | 10.247 | 0.389                             | 9.326   | 9.952           | 10.243 | 10.51           | 11.26                   |
| RFC4   | Ql4q05JB0nbQ0HU47o | rs1354091  | 3.62                         | 3.47                                  | 0.072                | 2.02                         | -1.78                         | 0.2425 | 9.479  | 0.279                             | 7.129   | 9.352           | 9.504  | 9.629           | 10.244                  |
| RFC4   | Ql4q05JB0nbQ0HU47o | rs2066500  | 3.62                         | 3.47                                  | -0.072               | 1.95                         | 0.24                          | 0.2425 | 9.479  | 0.279                             | 7.129   | 9.352           | 9.504  | 9.629           | 10.244                  |
| RFC4   | Ql4q05JB0nbQ0HU47o | rs16861184 | 3.62                         | 3.47                                  | -0.072               | 1.95                         | -3.81                         | 0.2425 | 9.479  | 0.279                             | 7.129   | 9.352           | 9.504  | 9.629           | 10.244                  |
| RFPL2  | oFEifo96HuL_KjopZc | rs738203   | 3.9                          | 3.73                                  | -0.074               | 0.43                         | 17.61                         | 0.2136 | 7.282  | 0.119                             | 7.112   | 7.19            | 7.255  | 7.348           | 7.631                   |
| RFPL2  | oFEifo96HuL_KjopZc | rs8142488  | 3.39                         | 3.24                                  | 0.064                | 0.61                         | 25.54                         | 0.19   | 7.282  | 0.119                             | 7.112   | 7.19            | 7.255  | 7.348           | 7.631                   |
| RFTN2  | Wfn.f1X3Dlrp.L_FSU | rs3792159  | 4.24                         | 4.06                                  | -0.085               | 2.55                         | -31.83                        | 0.385  | 7.175  | 0.054                             | 7.106   | 7.137           | 7.161  | 7.201           | 7.459                   |
| RFTN2  | Wfn.f1X3Dlrp.L_FSU | rs11685247 | 4.85                         | 4.64                                  | 0.099                | 3.44                         | 30.93                         | 0.14   | 7.175  | 0.054                             | 7.106   | 7.137           | 7.161  | 7.201           | 7.459                   |
| RFTN2  | Wfn.f1X3Dlrp.L_FSU | rs1455653  | 4.35                         | 4.16                                  | 0.087                | 2.75                         | 42.79                         | 0.38   | 7.175  | 0.054                             | 7.106   | 7.137           | 7.161  | 7.201           | 7.459                   |
| RFTN2  | Wfn.f1X3Dlrp.L_FSU | rs6719729  | 4.35                         | 4.16                                  | 0.087                | 2.75                         | 44.54                         | 0.38   | 7.175  | 0.054                             | 7.106   | 7.137           | 7.161  | 7.201           | 7.459                   |
| RFTN2  | Wfn.f1X3Dlrp.L_FSU | rs2045244  | 4.97                         | 4.75                                  | -0.101               | 2.14                         | -34.12                        | 0.1475 | 7.175  | 0.054                             | 7.106   | 7.137           | 7.161  | 7.201           | 7.459                   |
| RFTN2  | Wfn.f1X3Dlrp.L_FSU | rs7564924  | 7.2                          | 6.88                                  | -0.146               | 3.95                         | -26.71                        | 0.3525 | 7.175  | 0.054                             | 7.106   | 7.137           | 7.161  | 7.201           | 7.459                   |
| RFTN2  | Wfn.f1X3Dlrp.L_FSU | rs1598469  | 7.15                         | 6.83                                  | 0.146                | 3.63                         | -24.93                        | 0.3518 | 7.175  | 0.054                             | 7.106   | 7.137           | 7.161  | 7.201           | 7.459                   |
| RFTN2  | Wfn.f1X3Dlrp.L_FSU | rs1902249  | 7.07                         | 6.75                                  | 0.144                | 3.76                         | -19.23                        | 0.3518 | 7.175  | 0.054                             | 7.106   | 7.137           | 7.161  | 7.201           | 7.459                   |
| RGMB   | BMnvSK3XqonwBqoBHo | rs2545680  | 3.3                          | 3.16                                  | -0.064               | 0.8                          | -0.32                         | 0.1775 | 7.395  | 0.138                             | 7.143   | 7.292           | 7.38   | 7.478           | 7.872                   |
| RGS12  | iV1NbroRe7p3Reb.g  | rs3129317  | 3.29                         | 3.15                                  | -0.061               | 0.44                         | -28.22                        | 0.36   | 8.401  | 0.329                             | 7.686   | 8.197           | 8.389  | 8.566           | 9.669                   |



| Symbol   | Lumi nuID           | SNP        | Population-based | Population-based          | % Variance | Family-based     | Distance from   | MAF    | Mean      | Transcript abundance (log2 scale) |            |            |            |         | SNP mapping under probe |
|----------|---------------------|------------|------------------|---------------------------|------------|------------------|-----------------|--------|-----------|-----------------------------------|------------|------------|------------|---------|-------------------------|
|          |                     |            | association      | association               |            | association      |                 |        |           | Standard                          | 25th       | Median     | 75th       | Maximum |                         |
|          |                     |            | p-value (-log10) | p-value (-log10), GC adj. | Explained  | p-value (-log10) | transcript (kb) |        | Deviation | Minimum                           | percentile | percentile | percentile | Maximum |                         |
| RGS12    | iV1NbfroRe7p3Reb.g  | rs2857861  | 4.22             | 4.04                      | -0.077     | 1.36             | 7.89            | 0.4225 | 8.401     | 0.329                             | 7.686      | 8.197      | 8.389      | 8.566   | 9.669                   |
| RGS12    | iV1NbfroRe7p3Reb.g  | rs7435601  | 4.84             | 4.63                      | 0.092      | 1.56             | 53.77           | 0.3675 | 8.401     | 0.329                             | 7.686      | 8.197      | 8.389      | 8.566   | 9.669                   |
| RGS17    | ooA1w6o9d6_9HIAHuk  | rs583297   | 4.04             | 3.87                      | 0.08       | 1.55             | 17.79           | 0.405  | 7.144     | 0.029                             | 7.096      | 7.122      | 7.138      | 7.159   | 7.26                    |
| RGS17    | ooA1w6o9d6_9HIAHuk  | rs12192214 | 3.35             | 3.21                      | -0.064     | 2.32             | 40.48           | 0.3543 | 7.144     | 0.029                             | 7.096      | 7.122      | 7.138      | 7.159   | 7.26                    |
| RGS6     | u11S383gpUIAkVdwFo  | rs11621871 | 3.32             | 3.18                      | 0.067      | 1.14             | 101.33          | 0.191  | 7.164     | 0.04                              | 7.112      | 7.135      | 7.152      | 7.179   | 7.327                   |
| RHBDL2   | rjq3Wu3.knRPkro.no  | rs6703810  | 3.47             | 3.33                      | -0.066     | 0.37             | -6.12           | 0.0725 | 7.123     | 0.018                             | 7.101      | 7.114      | 7.12       | 7.127   | 7.279                   |
| RIMS3    | ZuSTf1wfvuvVq6SuRI  | rs12562229 | 5.92             | 5.66                      | 0.117      | 2.24             | 18.89           | 0.2525 | 8.214     | 0.228                             | 7.7        | 8.056      | 8.2        | 8.326   | 9.236                   |
| RIMS3    | ZuSTf1wfvuvVq6SuRI  | rs2780944  | 4.03             | 3.86                      | 0.08       | 2.03             | -15.72          | 0.305  | 8.214     | 0.228                             | 7.7        | 8.056      | 8.2        | 8.326   | 9.236                   |
| RIN2     | TUv5K6EBzifrs1GwRI  | rs4814909  | 3.57             | 3.42                      | -0.066     | 0.34             | -45.34          | 0.0925 | 7.871     | 0.619                             | 7.122      | 7.333      | 7.674      | 8.341   | 9.982                   |
| RIOK2    | KQootXnp3hizgig5XQ  | rs160632   | 4.56             | 4.37                      | -0.083     | 2.58             | 4.88            | 0.3725 | 9.365     | 0.243                             | 8.57       | 9.23       | 9.387      | 9.539   | 9.868                   |
| RIT2     | ip8uKgpZCCci1OU1_Og | rs949223   | 4.03             | 3.86                      | 0.081      | 1.03             | -181            | 0.1865 | 7.112     | 0.008                             | 7.096      | 7.106      | 7.111      | 7.116   | 7.136                   |
| RIT2     | ip8uKgpZCCci1OU1_Og | rs525291   | 3.81             | 3.65                      | -0.079     | 2.06             | -180.42         | 0.12   | 7.112     | 0.008                             | 7.096      | 7.106      | 7.111      | 7.116   | 7.136                   |
| RLN1     | 6hhXG6R7_IDvIw_vsU  | rs7047392  | 3.82             | 3.66                      | -0.073     | 1.4              | -37.41          | 0.2823 | 7.533     | 0.167                             | 7.205      | 7.411      | 7.521      | 7.629   | 8.133                   |
| RLN1     | 6hhXG6R7_IDvIw_vsU  | rs10491649 | 5.16             | 4.93                      | -0.101     | 4.59             | -16.2           | 0.447  | 7.533     | 0.167                             | 7.205      | 7.411      | 7.521      | 7.629   | 8.133                   |
| RLN1     | 6hhXG6R7_IDvIw_vsU  | rs10125965 | 5.52             | 5.28                      | -0.106     | 4.97             | -1.82           | 0.4425 | 7.533     | 0.167                             | 7.205      | 7.411      | 7.521      | 7.629   | 8.133                   |
| RLN1     | 6hhXG6R7_IDvIw_vsU  | rs2273782  | 11.98            | 11.43                     | -0.222     | 6.83             | 0.5             | 0.25   | 7.533     | 0.167                             | 7.205      | 7.411      | 7.521      | 7.629   | 8.133                   |
| RLN1     | 6hhXG6R7_IDvIw_vsU  | rs1322220  | 5.62             | 5.37                      | 0.106      | 3.66             | 0.72            | 0.425  | 7.533     | 0.167                             | 7.205      | 7.411      | 7.521      | 7.629   | 8.133                   |
| RLN1     | 6hhXG6R7_IDvIw_vsU  | rs2181146  | 5.53             | 5.29                      | -0.103     | 4.52             | 20.42           | 0.09   | 7.533     | 0.167                             | 7.205      | 7.411      | 7.521      | 7.629   | 8.133                   |
| RLN1     | 6hhXG6R7_IDvIw_vsU  | rs10815198 | 7.22             | 6.90                      | 0.137      | 3.05             | 35.35           | 0.3775 | 7.533     | 0.167                             | 7.205      | 7.411      | 7.521      | 7.629   | 8.133                   |
| RLN2     | oR6g3RaGioCR4gSgnk  | rs2273782  | 9.91             | 9.46                      | 0.194      | 1.14             | 30.89           | 0.25   | 7.814     | 0.262                             | 7.114      | 7.645      | 7.83       | 8.034   | 8.329                   |
| RLN2     | fgHz2QyEC4JZJSS19I  | rs2273782  | 4.47             | 4.28                      | 0.087      | 0.58             | 30.89           | 0.25   | 7.258     | 0.186                             | 7.106      | 7.136      | 7.179      | 7.296   | 8.011                   |
| RLN2     | oR6g3RaGioCR4gSgnk  | rs1322220  | 3.55             | 3.40                      | -0.067     | 0.13             | 36.02           | 0.425  | 7.814     | 0.262                             | 7.114      | 7.645      | 7.83       | 8.034   | 8.329                   |
| RMND1    | Kmg0Xg4gipHWfouj4   | rs7775640  | 4.65             | 4.45                      | -0.087     | 2.29             | -20.66          | 0.27   | 7.954     | 0.166                             | 7.347      | 7.838      | 7.961      | 8.067   | 8.371                   |
| RMND1    | Kmg0Xg4gipHWfouj4   | rs7771156  | 5.04             | 4.82                      | 0.095      | 1.17             | -4.24           | 0.395  | 7.954     | 0.166                             | 7.347      | 7.838      | 7.961      | 8.067   | 8.371                   |
| RMND1    | Kmg0Xg4gipHWfouj4   | rs3778608  | 4.76             | 4.56                      | -0.088     | 1.18             | 12.14           | 0.4749 | 7.954     | 0.166                             | 7.347      | 7.838      | 7.961      | 8.067   | 8.371                   |
| RMND1    | Kmg0Xg4gipHWfouj4   | rs3800270  | 5.38             | 5.15                      | -0.104     | 1.85             | 18.07           | 0.145  | 7.954     | 0.166                             | 7.347      | 7.838      | 7.961      | 8.067   | 8.371                   |
| RMND1    | Kmg0Xg4gipHWfouj4   | rs3757316  | 4.15             | 3.97                      | 0.077      | 0.42             | 1.08            | 0.4128 | 7.954     | 0.166                             | 7.347      | 7.838      | 7.961      | 8.067   | 8.371                   |
| RMND1    | Kmg0Xg4gipHWfouj4   | rs6916340  | 4.48             | 4.28                      | 0.082      | 1.18             | 5.8             | 0.41   | 7.954     | 0.166                             | 7.347      | 7.838      | 7.961      | 8.067   | 8.371                   |
| RMND1    | Kmg0Xg4gipHWfouj4   | rs6937816  | 3.69             | 3.53                      | 0.067      | 0.41             | 21.45           | 0.355  | 7.954     | 0.166                             | 7.347      | 7.838      | 7.961      | 8.067   | 8.371                   |
| RMND5A   | WfRSa_o_iSifouf61A  | rs938486   | 3.47             | 3.32                      | -0.067     | 2.35             | -7.71           | 0.3116 | 7.242     | 0.105                             | 7.1        | 7.182      | 7.225      | 7.281   | 8.18                    |
| RNASE4   | EUuyelHzUqf.cfTRCg  | rs10139564 | 5.9              | 5.64                      | -0.117     | 3.01             | -2.59           | 0.4075 | 7.665     | 0.423                             | 7.108      | 7.382      | 7.573      | 7.827   | 9.737                   |
| RNASE4   | EUuyelHzUqf.cfTRCg  | rs2067689  | 3.53             | 3.38                      | 0.069      | 0.78             | -2.44           | 0.2613 | 7.665     | 0.423                             | 7.108      | 7.382      | 7.573      | 7.827   | 9.737                   |
| RNASE4   | EUuyelHzUqf.cfTRCg  | rs9322855  | 3.64             | 3.48                      | -0.068     | 2.46             | 0.93            | 0.405  | 7.665     | 0.423                             | 7.108      | 7.382      | 7.573      | 7.827   | 9.737                   |
| RNASE4   | EUuyelHzUqf.cfTRCg  | rs8004382  | 3.73             | 3.58                      | -0.07      | 1.59             | 3.02            | 0.485  | 7.665     | 0.423                             | 7.108      | 7.382      | 7.573      | 7.827   | 9.737                   |
| RNASEH2B | 0kA4eSdlKf6c_C_Eluc | rs474012   | 3.51             | 3.36                      | 0.07       | 1.24             | -44.47          | 0.4875 | 8.847     | 1.047                             | 7.136      | 8.051      | 8.558      | 9.543   | 11.331                  |
| RNASEH2B | 0kA4eSdlKf6c_C_Eluc | rs2408213  | 3.74             | 3.59                      | -0.073     | 1.43             | -31.18          | 0.3    | 8.847     | 1.047                             | 7.136      | 8.051      | 8.558      | 9.543   | 11.331                  |
| RNASET2  | xjpUt9zVUXACFCt45U  | rs1212550  | 4.39             | 4.20                      | 0.084      | 2.48             | -11.84          | 0.3543 | 13.776    | 0.339                             | 12.944     | 13.562     | 13.754     | 13.977  | 14.629                  |
| RNASET2  | xjpUt9zVUXACFCt45U  | rs2236312  | 4.66             | 4.46                      | -0.094     | 0.69             | -9.97           | 0.2    | 13.776    | 0.339                             | 12.944     | 13.562     | 13.754     | 13.977  | 14.629                  |
| RNASET2  | xjpUt9zVUXACFCt45U  | rs2236313  | 8.68             | 8.29                      | -0.18      | 1.29             | -9.69           | 0.3975 | 13.776    | 0.339                             | 12.944     | 13.562     | 13.754     | 13.977  | 14.629                  |
| RNASET2  | xjpUt9zVUXACFCt45U  | rs9366076  | 6.36             | 6.08                      | 0.13       | 1.28             | 3.63            | 0.2325 | 13.776    | 0.339                             | 12.944     | 13.562     | 13.754     | 13.977  | 14.629                  |
| RNASET2  | xjpUt9zVUXACFCt45U  | rs9355610  | 7.34             | 7.01                      | -0.148     | 1.47             | 13              | 0.355  | 13.776    | 0.339                             | 12.944     | 13.562     | 13.754     | 13.977  | 14.629                  |
| RNASET2  | xjpUt9zVUXACFCt45U  | rs429083   | 10.12            | 9.66                      | 0.207      | 1.62             | 13.89           | 0.47   | 13.776    | 0.339                             | 12.944     | 13.562     | 13.754     | 13.977  | 14.629                  |
| RNASET2  | xjpUt9zVUXACFCt45U  | rs9366078  | 7.34             | 7.01                      | 0.148      | 1.47             | 29.43           | 0.355  | 13.776    | 0.339                             | 12.944     | 13.562     | 13.754     | 13.977  | 14.629                  |
| RNASET2  | xjpUt9zVUXACFCt45U  | rs933243   | 7.21             | 6.89                      | -0.148     | 1.25             | 33.8            | 0.3528 | 13.776    | 0.339                             | 12.944     | 13.562     | 13.754     | 13.977  | 14.629                  |
| RNASET2  | xjpUt9zVUXACFCt45U  | rs400837   | 10.12            | 9.66                      | 0.207      | 1.62             | 40.93           | 0.47   | 13.776    | 0.339                             | 12.944     | 13.562     | 13.754     | 13.977  | 14.629                  |
| RNF13    | Bi6khNgIASSzVoJHTk  | rs3772200  | 3.36             | 3.21                      | 0.066      | 1.79             | 13.85           | 0.0875 | 7.257     | 0.099                             | 7.131      | 7.19       | 7.231      | 7.295   | 7.738                   |
| RNF138   | f.Vd_0uT6gyoyH8SM   | rs4799327  | 8.1              | 7.73                      | 0.163      | 3.58             | 3.15            | 0.175  | 9.08      | 0.495                             | 7.19       | 8.852      | 9.147      | 9.401   | 10.147                  |
| RNF138   | f.Vd_0uT6gyoyH8SM   | rs7229437  | 6.96             | 6.65                      | 0.141      | 3.09             | -13.33          | 0.1675 | 9.08      | 0.495                             | 7.19       | 8.852      | 9.147      | 9.401   | 10.147                  |
| RNF138   | f.Vd_0uT6gyoyH8SM   | rs4239374  | 13.08            | 12.47                     | 0.259      | 2.78             | -9.3            | 0.0625 | 9.08      | 0.495                             | 7.19       | 8.852      | 9.147      | 9.401   | 10.147                  |
| RNF138   | f.Vd_0uT6gyoyH8SM   | rs1834162  | 3.71             | 3.55                      | -0.072     | 1.7              | 19.56           | 0.055  | 9.08      | 0.495                             | 7.19       | 8.852      | 9.147      | 9.401   | 10.147                  |
| RNF150   | KorXnkBVeJf5T0cFfA  | rs7687054  | 11.17            | 11.17                     | 0.235      | 1.8              | -121.52         | 0.085  | 7.127     | 0.113                             | 7.092      | 7.104      | 7.11       | 7.118   | 8.541                   |
| RNF150   | KorXnkBVeJf5T0cFfA  | rs17425634 | 3.38             | 3.23                      | -0.064     | 1.02             | -111.56         | 0.2725 | 7.127     | 0.113                             | 7.092      | 7.104      | 7.11       | 7.118   | 8.541                   |
| RNF167   | KVCfdXxURc1.4qn_q4  | rs400688   | 6.26             | 5.98                      | -0.129     | 3.86             | -3.7            | 0.1913 | 10.018    | 0.278                             | 9.214      | 9.831      | 10.021     | 10.196  | 10.63                   |
| RNF167   | KVCfdXxURc1.4qn_q4  | rs238224   | 3.93             | 3.76                      | -0.073     | 2.4              | 14.87           | 0.1725 | 10.018    | 0.278                             | 9.214      | 9.831      | 10.021     | 10.196  | 10.63                   |
| RNF167   | KVCfdXxURc1.4qn_q4  | rs452825   | 5.6              | 5.35                      | 0.109      | 3.96             | 25.68           | 0.2    | 10.018    | 0.278                             | 9.214      | 9.831      | 10.021     | 10.196  | 10.63                   |
| RNF167   | KVCfdXxURc1.4qn_q4  | rs238228   | 5.45             | 5.25                      | 0.107      | 3.47             | 30.42           | 0.21   | 10.018    | 0.278                             | 9.214      | 9.831      | 10.021     | 10.196  | 10.63                   |
| RNF175   | rRyp6DKEkhVIJBMeTo  | rs7654018  | 3.77             | 3.61                      | -0.074     | 0.64             | 8.36            | 0.3475 | 7.884     | 0.371                             | 7.19       | 7.614      | 7.851      | 8.085   | 9.337                   |
| RNF175   | rRyp6DKEkhVIJBMeTo  | rs10517577 | 7.17             | 6.85                      | 0.143      | 1.73             | 13.22           | 0.26   | 7.884     | 0.371                             | 7.19       | 7.614      | 7.851      | 8.085   | 9.337                   |
| RNF175   | rRyp6DKEkhVIJBMeTo  | rs2606324  | 8                | 7.64                      | -0.159     | 1.75             | 21.14           | 0.265  | 7.884     | 0.371                             | 7.19       | 7.614      | 7.851      | 8.085   | 9.337                   |
| RNF175   | rRyp6DKEkhVIJBMeTo  | rs2251997  | 8                | 7.64                      | -0.159     | 1.75             | 22.75           | 0.265  | 7.884     | 0.371                             | 7.19       | 7.614      | 7.851      | 8.085   | 9.337                   |
| RNF175   | rRyp6DKEkhVIJBMeTo  | rs2251900  | 8                | 7.64                      | -0.159     | 1.75             | 22.83           | 0.265  | 7.884     | 0.371                             | 7.19       | 7.614      | 7.851      | 8.085   | 9.337                   |
| RNF175   | rRyp6DKEkhVIJBMeTo  | rs11099898 | 10.19            | 9.73                      | 0.205      | 3.19             | -16.37          | 0.4975 | 7.884     | 0.371                             | 7.19       | 7.614      | 7.851      | 8.085   | 9.337                   |

| Symbol  | Lumi nuID           | SNP        | Population-based | Population-based          | % Variance | Family-based     | Distance from | MAF    | Mean      | Transcript abundance (log2 scale) |            |            |            |         | SNP mapping under probe |         |
|---------|---------------------|------------|------------------|---------------------------|------------|------------------|---------------|--------|-----------|-----------------------------------|------------|------------|------------|---------|-------------------------|---------|
|         |                     |            | association      | association               |            | association      |               |        |           | transcript (kb)                   | Standard   | 25th       | Median     | 75th    |                         | Maximum |
|         |                     |            | p-value (-log10) | p-value (-log10), GC adj. | Explained  | p-value (-log10) |               |        | Deviation | Minimum                           | percentile | percentile | percentile | Maximum |                         |         |
| RNF175  | rRyp6DKEkhVIJBMeTo  | rs1598632  | 10.56            | 10.08                     | 0.216      | 2.91             | -14.01        | 0.4923 | 7.884     | 0.371                             | 7.19       | 7.614      | 7.851      | 8.085   | 9.337                   |         |
| RNF175  | rRyp6DKEkhVIJBMeTo  | rs7653960  | 8.7              | 8.31                      | -0.171     | 2.43             | 16.04         | 0.315  | 7.884     | 0.371                             | 7.19       | 7.614      | 7.851      | 8.085   | 9.337                   |         |
| RNF175  | rRyp6DKEkhVIJBMeTo  | rs732681   | 7.65             | 7.31                      | 0.156      | 3.16             | 43.73         | 0.4598 | 7.884     | 0.371                             | 7.19       | 7.614      | 7.851      | 8.085   | 9.337                   |         |
| RNF190  | un4k3OpJRJhS3LVISQ  | rs8072519  | 4.55             | 4.35                      | 0.091      | 3.09             | 7.82          | 0.365  | 7.139     | 0.038                             | 7.099      | 7.118      | 7.131      | 7.145   | 7.483                   |         |
| RNF190  | un4k3OpJRJhS3LVISQ  | rs17683483 | 4.6              | 4.40                      | -0.094     | 1.33             | 23.81         | 0.15   | 7.139     | 0.038                             | 7.099      | 7.118      | 7.131      | 7.145   | 7.483                   |         |
| RNF32   | chKXX9TI7Xd5Z15xSA  | rs7790357  | 4.47             | 4.27                      | -0.092     | 3.64             | -5.61         | 0.1658 | 7.159     | 0.04                              | 7.106      | 7.132      | 7.149      | 7.176   | 7.336                   |         |
| RNF32   | chKXX9TI7Xd5Z15xSA  | rs12007    | 3.38             | 3.24                      | 0.062      | 1.91             | -0.2          | 0.34   | 7.159     | 0.04                              | 7.106      | 7.132      | 7.149      | 7.176   | 7.336                   |         |
| RNF8    | uviksou6r36ghjql_w  | rs2284922  | 4.3              | 4.12                      | 0.082      | 1.75             | -13.48        | 0.32   | 7.301     | 0.087                             | 7.124      | 7.246      | 7.296      | 7.343   | 7.774                   |         |
| RNPEP   | cR5KkmrPddVFWt3qCA  | rs4950752  | 3.86             | 3.69                      | -0.072     | 1.32             | 4.66          | 0.4    | 9.259     | 0.387                             | 8.146      | 9.036      | 9.246      | 9.424   | 10.628                  |         |
| ROBO1   | rs0reFUJugBAIAQB4FE | rs1865862  | 4.45             | 4.26                      | -0.088     | 2.22             | 157.46        | 0.285  | 7.12      | 0.013                             | 7.099      | 7.111      | 7.117      | 7.124   | 7.182                   |         |
| ROBO3   | WCiKEgGWloFCOFfvk   | rs11219821 | 10.76            | 10.27                     | 0.208      | 2.67             | 6.49          | 0.48   | 8.569     | 0.49                              | 7.384      | 8.242      | 8.564      | 8.891   | 10.118                  |         |
| ROBO3   | WCiKEgGWloFCOFfvk   | rs4606490  | 6.9              | 6.59                      | 0.134      | 1.14             | 7.45          | 0.4592 | 8.569     | 0.49                              | 7.384      | 8.242      | 8.564      | 8.891   | 10.118                  |         |
| ROBO3   | WCiKEgGWloFCOFfvk   | rs6590109  | 3.41             | 3.27                      | -0.062     | 0.73             | 7.69          | 0.355  | 8.569     | 0.49                              | 7.384      | 8.242      | 8.564      | 8.891   | 10.118                  |         |
| ROBO3   | WCiKEgGWloFCOFfvk   | rs4586175  | 4.18             | 4.00                      | -0.081     | 0.85             | 18.26         | 0.21   | 8.569     | 0.49                              | 7.384      | 8.242      | 8.564      | 8.891   | 10.118                  |         |
| ROBO3   | WCiKEgGWloFCOFfvk   | rs4077566  | 9.02             | 8.61                      | 0.178      | 2.4              | 19.91         | 0.4075 | 8.569     | 0.49                              | 7.384      | 8.242      | 8.564      | 8.891   | 10.118                  |         |
| ROBO3   | WCiKEgGWloFCOFfvk   | rs4936958  | 3.35             | 3.21                      | -0.06      | 0.54             | 43.79         | 0.1307 | 8.569     | 0.49                              | 7.384      | 8.242      | 8.564      | 8.891   | 10.118                  |         |
| RPA2    | ZiVyWlBeel3l7.T9Uc  | rs3766398  | 3.47             | 3.32                      | -0.067     | 1.29             | -8.74         | 0.3317 | 10.119    | 0.264                             | 9.46       | 9.945      | 10.125     | 10.301  | 10.721                  |         |
| RPA2    | ZiVyWlBeel3l7.T9Uc  | rs3766400  | 3.74             | 3.58                      | -0.073     | 1.07             | -8.68         | 0.3342 | 10.119    | 0.264                             | 9.46       | 9.945      | 10.125     | 10.301  | 10.721                  |         |
| RPA2    | ZiVyWlBeel3l7.T9Uc  | rs2236074  | 7.75             | 7.40                      | 0.154      | 2.69             | -6.66         | 0.3775 | 10.119    | 0.264                             | 9.46       | 9.945      | 10.125     | 10.301  | 10.721                  |         |
| RPA2    | ZiVyWlBeel3l7.T9Uc  | rs1467464  | 7.32             | 6.99                      | 0.15       | 3.24             | -6.4          | 0.392  | 10.119    | 0.264                             | 9.46       | 9.945      | 10.125     | 10.301  | 10.721                  |         |
| RPA2    | ZiVyWlBeel3l7.T9Uc  | rs7536088  | 7.12             | 6.80                      | -0.144     | 3.02             | -6.91         | 0.3875 | 10.119    | 0.264                             | 9.46       | 9.945      | 10.125     | 10.301  | 10.721                  |         |
| RPA3    | Z3eg_6C6_giwWUkUU0  | rs886727   | 3.37             | 3.23                      | -0.065     | 1.87             | -12.78        | 0.2854 | 10.688    | 0.262                             | 9.296      | 10.577     | 10.714     | 10.859  | 11.277                  |         |
| RPL13   | E67v26gQepeo6p9Hns  | rs2292954  | 6.76             | 6.46                      | 0.13       | 2.18             | -14.01        | 0.17   | 13.061    | 0.382                             | 11.996     | 12.788     | 13.097     | 13.304  | 14.15                   |         |
| RPL13   | E67v26gQepeo6p9Hns  | rs2019604  | 4.37             | 4.18                      | -0.083     | 2.12             | -11.37        | 0.148  | 13.061    | 0.382                             | 11.996     | 12.788     | 13.097     | 13.304  | 14.15                   |         |
| RPL13   | E67v26gQepeo6p9Hns  | rs2889543  | 6.47             | 6.18                      | -0.124     | 2.08             | -10.96        | 0.1683 | 13.061    | 0.382                             | 11.996     | 12.788     | 13.097     | 13.304  | 14.15                   |         |
| RPL13   | E67v26gQepeo6p9Hns  | rs17775174 | 6.76             | 6.46                      | 0.13       | 2.18             | -9.61         | 0.17   | 13.061    | 0.382                             | 11.996     | 12.788     | 13.097     | 13.304  | 14.15                   |         |
| RPL13   | E67v26gQepeo6p9Hns  | rs3751691  | 7.69             | 7.36                      | 0.146      | 2.11             | 1.25          | 0.16   | 13.061    | 0.382                             | 11.996     | 12.788     | 13.097     | 13.304  | 14.15                   |         |
| RPL13   | E67v26gQepeo6p9Hns  | rs3751688  | 6.77             | 6.47                      | -0.129     | 2.12             | 4.59          | 0.16   | 13.061    | 0.382                             | 11.996     | 12.788     | 13.097     | 13.304  | 14.15                   |         |
| RPL28   | BVCRReghOUJ7ksOXro  | rs6509940  | 5.32             | 5.09                      | 0.102      | 2.13             | -13.42        | 0.475  | 8.843     | 0.26                              | 8.053      | 8.667      | 8.865      | 9.025   | 9.548                   |         |
| RPL28   | BVCRReghOUJ7ksOXro  | rs17700376 | 18.32            | 17.46                     | -0.342     | 5.54             | 0.03          | 0.34   | 8.843     | 0.26                              | 8.053      | 8.667      | 8.865      | 9.025   | 9.548                   |         |
| RPL28   | BVCRReghOUJ7ksOXro  | rs10425596 | 3.61             | 3.45                      | 0.068      | 0.43             | -2.35         | 0.2025 | 8.843     | 0.26                              | 8.053      | 8.667      | 8.865      | 9.025   | 9.548                   |         |
| RPL37   | 3Xm0SoJbcSIJJ1UlJg  | rs466108   | 3.31             | 3.17                      | 0.061      | 0.42             | -28.62        | 0.315  | 8.952     | 0.243                             | 8.208      | 8.812      | 8.957      | 9.12    | 9.606                   |         |
| RPL37   | 3Xm0SoJbcSIJJ1UlJg  | rs461404   | 3.31             | 3.17                      | -0.061     | 0.42             | -25.82        | 0.315  | 8.952     | 0.243                             | 8.208      | 8.812      | 8.957      | 9.12    | 9.606                   |         |
| RPP38   | xVWnS4iDZVbT6fAO70  | rs7918775  | 3.31             | 3.17                      | -0.064     | 2                | 5.66          | 0.2175 | 7.947     | 0.238                             | 7.172      | 7.799      | 7.912      | 8.102   | 8.567                   |         |
| RPRM    | 3nbh5GvxlEAud_E1uE  | rs11676810 | 3.31             | 3.17                      | -0.061     | 1.89             | -23.48        | 0.2725 | 7.243     | 0.187                             | 7.111      | 7.147      | 7.173      | 7.25    | 8.385                   |         |
| RPRM    | 3nbh5GvxlEAud_E1uE  | rs4294952  | 3.83             | 3.67                      | -0.073     | 1.89             | -7.08         | 0.2764 | 7.243     | 0.187                             | 7.111      | 7.147      | 7.173      | 7.25    | 8.385                   |         |
| RPS23   | fdXvu97FLk4BV7RM1U  | rs17245874 | 4.96             | 4.74                      | 0.102      | 4.29             | -41.88        | 0.195  | 12.063    | 0.754                             | 8.846      | 11.88      | 12.29      | 12.567  | 13.826                  | Yes     |
| RPS23   | fdXvu97FLk4BV7RM1U  | rs2195448  | 17.93            | 17.09                     | -0.339     | 7.71             | -27.9         | 0.4875 | 12.063    | 0.754                             | 8.846      | 11.88      | 12.29      | 12.567  | 13.826                  | Yes     |
| RPS23   | fdXvu97FLk4BV7RM1U  | rs1864183  | 17.48            | 16.66                     | 0.33       | 7.76             | -19.92        | 0.495  | 12.063    | 0.754                             | 8.846      | 11.88      | 12.29      | 12.567  | 13.826                  | Yes     |
| RPS23   | fdXvu97FLk4BV7RM1U  | rs1864182  | 24.07            | 22.93                     | -0.43      | 6.87             | -19.9         | 0.4271 | 12.063    | 0.754                             | 8.846      | 11.88      | 12.29      | 12.567  | 13.826                  | Yes     |
| RPS23   | fdXvu97FLk4BV7RM1U  | rs749401   | 30.77            | 29.30                     | 0.518      | 6.12             | -7.77         | 0.2325 | 12.063    | 0.754                             | 8.846      | 11.88      | 12.29      | 12.567  | 13.826                  | Yes     |
| RPS23   | fdXvu97FLk4BV7RM1U  | rs226201   | 33.59            | 31.99                     | -0.548     | 9.11             | -2.39         | 0.3813 | 12.063    | 0.754                             | 8.846      | 11.88      | 12.29      | 12.567  | 13.826                  | Yes     |
| RPS23   | fdXvu97FLk4BV7RM1U  | rs226206   | 60.48            | 57.57                     | -0.776     | 8.86             | 18.78         | 0.28   | 12.063    | 0.754                             | 8.846      | 11.88      | 12.29      | 12.567  | 13.826                  | Yes     |
| RPS23   | fdXvu97FLk4BV7RM1U  | rs701405   | 4.74             | 4.53                      | -0.092     | 1.85             | 19.36         | 0.2325 | 12.063    | 0.754                             | 8.846      | 11.88      | 12.29      | 12.567  | 13.826                  | Yes     |
| RPS23   | fdXvu97FLk4BV7RM1U  | rs226205   | 38.93            | 37.07                     | 0.614      | 7.33             | 19.42         | 0.2312 | 12.063    | 0.754                             | 8.846      | 11.88      | 12.29      | 12.567  | 13.826                  | Yes     |
| RPS23   | fdXvu97FLk4BV7RM1U  | rs2215128  | 11.48            | 10.95                     | -0.228     | 5.85             | 20.85         | 0.3875 | 12.063    | 0.754                             | 8.846      | 11.88      | 12.29      | 12.567  | 13.826                  | Yes     |
| RPS23   | fdXvu97FLk4BV7RM1U  | rs862239   | 3.75             | 3.59                      | -0.071     | 1.74             | 21.34         | 0.185  | 12.063    | 0.754                             | 8.846      | 11.88      | 12.29      | 12.567  | 13.826                  | Yes     |
| RPS23   | fdXvu97FLk4BV7RM1U  | rs12659061 | 3.35             | 3.21                      | -0.065     | 0.47             | 35.22         | 0.1475 | 12.063    | 0.754                             | 8.846      | 11.88      | 12.29      | 12.567  | 13.826                  | Yes     |
| RPS23   | fdXvu97FLk4BV7RM1U  | rs658912   | 18.7             | 18.2                      | 0.346      | 6.82             | 38.24         | 0.335  | 12.063    | 0.754                             | 8.846      | 11.88      | 12.29      | 12.567  | 13.826                  | Yes     |
| RPS23   | fdXvu97FLk4BV7RM1U  | rs224804   | 30.86            | 29.39                     | 0.509      | 9.29             | 43.82         | 0.3925 | 12.063    | 0.754                             | 8.846      | 11.88      | 12.29      | 12.567  | 13.826                  | Yes     |
| RPS6KA2 | coDlhRl003QXo7oIRQ  | rs1309150  | 3.43             | 3.29                      | -0.06      | 2.07             | -45.67        | 0.2236 | 7.437     | 0.29                              | 7.127      | 7.201      | 7.301      | 7.655   | 8.462                   | Yes     |
| RPS6KA2 | coDlhRl003QXo7oIRQ  | rs1099652  | 3.31             | 3.17                      | -0.058     | 1.58             | -45.25        | 0.1675 | 7.437     | 0.29                              | 7.127      | 7.201      | 7.301      | 7.655   | 8.462                   | Yes     |
| RPS6KA2 | coDlhRl003QXo7oIRQ  | rs6902718  | 3.82             | 3.65                      | 0.068      | 2.38             | -42.86        | 0.2475 | 7.437     | 0.29                              | 7.127      | 7.201      | 7.301      | 7.655   | 8.462                   | Yes     |
| RPS6KA2 | coDlhRl003QXo7oIRQ  | rs1099663  | 3.77             | 3.61                      | -0.068     | 1.92             | -39.14        | 0.1925 | 7.437     | 0.29                              | 7.127      | 7.201      | 7.301      | 7.655   | 8.462                   | Yes     |
| RPS6KA2 | coDlhRl003QXo7oIRQ  | rs6918384  | 34.69            | 33.04                     | 0.536      | 6.5              | -5.79         | 0.1975 | 7.437     | 0.29                              | 7.127      | 7.201      | 7.301      | 7.655   | 8.462                   | Yes     |
| RPS6KA2 | coDlhRl003QXo7oIRQ  | rs9356529  | 39.94            | 38.03                     | 0.582      | 7.1              | -4.63         | 0.2725 | 7.437     | 0.29                              | 7.127      | 7.201      | 7.301      | 7.655   | 8.462                   | Yes     |
| RPS6KA2 | coDlhRl003QXo7oIRQ  | rs9356531  | 37.92            | 36.10                     | -0.57      | 8.16             | 1.19          | 0.2825 | 7.437     | 0.29                              | 7.127      | 7.201      | 7.301      | 7.655   | 8.462                   | Yes     |
| RPS6KA2 | coDlhRl003QXo7oIRQ  | rs4710128  | 32.7             | 31.14                     | -0.513     | 6.46             | 7.18          | 0.225  | 7.437     | 0.29                              | 7.127      | 7.201      | 7.301      | 7.655   | 8.462                   | Yes     |
| RPS6KA2 | coDlhRl003QXo7oIRQ  | rs13204302 | 15.9             | 15.15                     | 0.3        | 6.03             | 12            | 0.3274 | 7.437     | 0.29                              | 7.127      | 7.201      | 7.301      | 7.655   | 8.462                   | Yes     |
| RPS6KA2 | coDlhRl003QXo7oIRQ  | rs7766409  | 16.39            | 15.62                     | 0.307      | 5.78             | 14.07         | 0.31   | 7.437     | 0.29                              | 7.127      | 7.201      | 7.301      | 7.655   | 8.462                   | Yes     |
| RPS6KA2 | coDlhRl003QXo7oIRQ  | rs9459785  | 16.55            | 15.78                     | -0.3       | 3.37             | 20.02         | 0.095  | 7.437     | 0.29                              | 7.127      | 7.201      | 7.301      | 7.655   | 8.462                   | Yes     |
| RPS6KA2 | coDlhRl003QXo7oIRQ  | rs10455981 | 18.24            | 17.39                     | 0.338      | 5.92             | 20.97         | 0.295  | 7.437     | 0.29                              | 7.127      | 7.201      | 7.301      | 7.655   | 8.462                   | Yes     |

| Symbol  | Lumi nuID           | SNP        | Population-based association |                           | % Variance Explained | Family-based association |                               | Transcript abundance (log2 scale) |        |                    |         |                 |        |                 | SNP mapping under probe |         |
|---------|---------------------|------------|------------------------------|---------------------------|----------------------|--------------------------|-------------------------------|-----------------------------------|--------|--------------------|---------|-----------------|--------|-----------------|-------------------------|---------|
|         |                     |            | p-value (-log10)             | p-value (-log10), GC adj. |                      | p-value (-log10)         | Distance from transcript (kb) | MAF                               | Mean   | Standard Deviation | Minimum | 25th percentile | Median | 75th percentile |                         | Maximum |
| RRP7A   | rSiCWWheniJUCi0K2C8 | rs4822135  | 5.22                         | 5.00                      | 0.107                | 2.84                     | -31.97                        | 0.4849                            | 8.083  | 0.352              | 7.15    | 7.849           | 8.086  | 8.327           | 9.026                   |         |
| RRP7A   | Q35dRFdd1KFfej1ve4  | rs4822135  | 3.74                         | 3.58                      | 0.074                | 2.44                     | -31.97                        | 0.4849                            | 9.563  | 0.419              | 8.1     | 9.333           | 9.626  | 9.795           | 11.172                  |         |
| RRP7A   | rSiCWWheniJUCi0K2C8 | rs11703700 | 5.02                         | 4.81                      | 0.103                | 2.78                     | -31.03                        | 0.4899                            | 8.083  | 0.352              | 7.15    | 7.849           | 8.086  | 8.327           | 9.026                   |         |
| RRP7A   | Q35dRFdd1KFfej1ve4  | rs11703700 | 3.94                         | 3.77                      | 0.079                | 2.68                     | -31.03                        | 0.4899                            | 9.563  | 0.419              | 8.1     | 9.333           | 9.626  | 9.795           | 11.172                  |         |
| RRP7A   | rSiCWWheniJUCi0K2C8 | rs4822136  | 18.56                        | 17.69                     | -0.349               | 5.45                     | -27.61                        | 0.1475                            | 9.563  | 0.419              | 8.1     | 9.333           | 9.626  | 9.795           | 11.172                  |         |
| RRP7A   | Q35dRFdd1KFfej1ve4  | rs4822136  | 6.33                         | 6.05                      | -0.127               | 3.31                     | -27.61                        | 0.1475                            | 8.083  | 0.352              | 7.15    | 7.849           | 8.086  | 8.327           | 9.026                   |         |
| RSPH3   | ZQSULSQkNKw47mLVdl  | rs2273067  | 4.58                         | 4.38                      | -0.089               | 1.67                     | 37.6                          | 0.085                             | 7.879  | 0.179              | 7.121   | 7.773           | 7.875  | 7.984           | 8.697                   |         |
| RSPH3   | ZQSULSQkNKw47mLVdl  | rs2073138  | 4.58                         | 4.38                      | 0.089                | 1.67                     | 40.73                         | 0.085                             | 7.879  | 0.179              | 7.121   | 7.773           | 7.875  | 7.984           | 8.697                   |         |
| RSPRY1  | The5Oj7L_Seif5U_7Y  | rs4293366  | 4.11                         | 3.93                      | 0.079                | 3.01                     | 38.86                         | 0.4575                            | 10.509 | 0.318              | 9.861   | 10.305          | 10.451 | 10.686          | 11.52                   |         |
| RSRC1   | Zk1cec0LFCOEPV6VnQ  | rs10936145 | 3.53                         | 3.38                      | -0.066               | 0.63                     | -69.45                        | 0.285                             | 8.059  | 0.261              | 7.462   | 7.86            | 8.069  | 8.246           | 8.699                   |         |
| RSRC1   | Zk1cec0LFCOEPV6VnQ  | rs17684859 | 4.07                         | 3.89                      | 0.077                | 0.9                      | -48.74                        | 0.29                              | 8.059  | 0.261              | 7.462   | 7.86            | 8.069  | 8.246           | 8.699                   |         |
| RSRC1   | Zk1cec0LFCOEPV6VnQ  | rs2117764  | 3.95                         | 3.78                      | -0.072               | 0.62                     | -25.72                        | 0.3875                            | 8.059  | 0.261              | 7.462   | 7.86            | 8.069  | 8.246           | 8.699                   |         |
| RTN4    | 0eS_5Jloh5f1a_KAas  | rs2588512  | 4.86                         | 4.65                      | 0.094                | 1.53                     | -7.24                         | 0.165                             | 7.499  | 0.253              | 7.109   | 7.281           | 7.477  | 7.652           | 8.293                   |         |
| RTN4    | lhxfUfUFS5_M.SLS0   | rs2588512  | 4.12                         | 3.94                      | 0.079                | 2.73                     | -7.24                         | 0.165                             | 11.774 | 0.28               | 10.916  | 11.627          | 11.78  | 11.948          | 12.876                  |         |
| RTN4IP1 | 964df114E6Fj6kySOK  | rs13193036 | 4.27                         | 4.08                      | -0.081               | 1.97                     | -49.31                        | 0.2925                            | 8.43   | 0.138              | 8.063   | 8.332           | 8.428  | 8.512           | 8.83                    |         |
| RTN4IP1 | 964df114E6Fj6kySOK  | rs783390   | 3.51                         | 3.37                      | -0.068               | 0.88                     | -43.56                        | 0.3426                            | 8.43   | 0.138              | 8.063   | 8.332           | 8.428  | 8.512           | 8.83                    |         |
| RTN4IP1 | 964df114E6Fj6kySOK  | rs9320173  | 4.81                         | 4.60                      | -0.093               | 3.12                     | -35.18                        | 0.3075                            | 8.43   | 0.138              | 8.063   | 8.332           | 8.428  | 8.512           | 8.83                    |         |
| RTN4IP1 | 964df114E6Fj6kySOK  | rs7756087  | 7.52                         | 7.18                      | 0.147                | 3.22                     | 19.58                         | 0.3593                            | 8.43   | 0.138              | 8.063   | 8.332           | 8.428  | 8.512           | 8.83                    |         |
| RTN4IP1 | 964df114E6Fj6kySOK  | rs898896   | 3.93                         | 3.76                      | 0.073                | 0.7                      | -14.19                        | 0.3375                            | 8.43   | 0.138              | 8.063   | 8.332           | 8.428  | 8.512           | 8.83                    |         |
| RTN4IP1 | 964df114E6Fj6kySOK  | rs2054365  | 8.5                          | 8.12                      | -0.167               | 3.96                     | 0.15                          | 0.41                              | 8.43   | 0.138              | 8.063   | 8.332           | 8.428  | 8.512           | 8.83                    |         |
| RTN4IP1 | 964df114E6Fj6kySOK  | rs7750365  | 6.69                         | 6.39                      | -0.137               | 2.68                     | 11.94                         | 0.447                             | 8.43   | 0.138              | 8.063   | 8.332           | 8.428  | 8.512           | 8.83                    |         |
| RTN4IP1 | 964df114E6Fj6kySOK  | rs3804345  | 3.64                         | 3.49                      | -0.069               | 1.67                     | 20.73                         | 0.4898                            | 8.43   | 0.138              | 8.063   | 8.332           | 8.428  | 8.512           | 8.83                    |         |
| RTN4IP1 | 964df114E6Fj6kySOK  | rs3101493  | 7.43                         | 7.09                      | 0.152                | 2.91                     | 38.04                         | 0.404                             | 8.43   | 0.138              | 8.063   | 8.332           | 8.428  | 8.512           | 8.83                    |         |
| RTN4IP1 | 964df114E6Fj6kySOK  | rs3121447  | 3.79                         | 3.62                      | -0.072               | 0.98                     | 39.09                         | 0.4646                            | 8.43   | 0.138              | 8.063   | 8.332           | 8.428  | 8.512           | 8.83                    |         |
| RTN4IP1 | 964df114E6Fj6kySOK  | rs3121445  | 7.03                         | 6.72                      | -0.142               | 2.76                     | 46.53                         | 0.405                             | 8.43   | 0.138              | 8.063   | 8.332           | 8.428  | 8.512           | 8.83                    |         |
| RTN4IP1 | 964df114E6Fj6kySOK  | rs3821812  | 3.4                          | 3.26                      | 0.066                | 0.49                     | -0.56                         | 0.32                              | 8.165  | 0.25               | 7.559   | 7.996           | 8.136  | 8.358           | 9.049                   |         |
| RUNX2   | uVOPWKAqHpUg1K8MTo  | rs910586   | 5.1                          | 4.87                      | -0.101               | 2.8                      | -108.51                       | 0.31                              | 8.7    | 0.375              | 7.68    | 8.455           | 8.724  | 8.969           | 9.572                   | Yes     |
| RUNX2   | uVOPWKAqHpUg1K8MTo  | rs2677099  | 5.38                         | 5.14                      | -0.109               | 2.92                     | -98.9                         | 0.3087                            | 8.7    | 0.375              | 7.68    | 8.455           | 8.724  | 8.969           | 9.572                   | Yes     |
| RUNX2   | uVOPWKAqHpUg1K8MTo  | rs2790102  | 5.94                         | 5.68                      | 0.119                | 2.85                     | -86.61                        | 0.3075                            | 8.7    | 0.375              | 7.68    | 8.455           | 8.724  | 8.969           | 9.572                   | Yes     |
| RUNX2   | uVOPWKAqHpUg1K8MTo  | rs9472494  | 5.78                         | 5.53                      | -0.115               | 3.02                     | -66.98                        | 0.305                             | 8.7    | 0.375              | 7.68    | 8.455           | 8.724  | 8.969           | 9.572                   | Yes     |
| RUNX2   | uVOPWKAqHpUg1K8MTo  | rs6904353  | 3.74                         | 3.58                      | -0.072               | 2.31                     | -25.74                        | 0.405                             | 8.7    | 0.375              | 7.68    | 8.455           | 8.724  | 8.969           | 9.572                   | Yes     |
| RUNX2   | uVOPWKAqHpUg1K8MTo  | rs7748231  | 3.74                         | 3.58                      | -0.072               | 2.31                     | -17.27                        | 0.405                             | 8.7    | 0.375              | 7.68    | 8.455           | 8.724  | 8.969           | 9.572                   | Yes     |
| RUNX2   | uVOPWKAqHpUg1K8MTo  | rs12209785 | 6.07                         | 5.81                      | -0.12                | 2.8                      | -12.7                         | 0.2425                            | 8.7    | 0.375              | 7.68    | 8.455           | 8.724  | 8.969           | 9.572                   | Yes     |
| RUNX2   | uVOPWKAqHpUg1K8MTo  | rs1928533  | 4.67                         | 4.47                      | -0.092               | 2.89                     | -8.99                         | 0.385                             | 8.7    | 0.375              | 7.68    | 8.455           | 8.724  | 8.969           | 9.572                   | Yes     |
| RUNX2   | uVOPWKAqHpUg1K8MTo  | rs10948238 | 4.97                         | 4.76                      | -0.098               | 2.96                     | -7.28                         | 0.3725                            | 8.7    | 0.375              | 7.68    | 8.455           | 8.724  | 8.969           | 9.572                   | Yes     |
| RUNX2   | uVOPWKAqHpUg1K8MTo  | rs13201287 | 7.93                         | 7.57                      | 0.159                | 4.21                     | -6.87                         | 0.235                             | 8.7    | 0.375              | 7.68    | 8.455           | 8.724  | 8.969           | 9.572                   | Yes     |
| RUNX2   | uVOPWKAqHpUg1K8MTo  | rs2772395  | 7.1                          | 6.79                      | 0.145                | 3.81                     | 2.63                          | 0.3875                            | 8.7    | 0.375              | 7.68    | 8.455           | 8.724  | 8.969           | 9.572                   | Yes     |
| RUNX2   | uVOPWKAqHpUg1K8MTo  | rs13191376 | 8.24                         | 7.87                      | -0.168               | 3.28                     | 3.32                          | 0.3241                            | 8.7    | 0.375              | 7.68    | 8.455           | 8.724  | 8.969           | 9.572                   | Yes     |
| RUNX2   | uVOPWKAqHpUg1K8MTo  | rs485817   | 9.54                         | 9.11                      | -0.194               | 4.65                     | 4.59                          | 0.465                             | 8.7    | 0.375              | 7.68    | 8.455           | 8.724  | 8.969           | 9.572                   | Yes     |
| RUNX2   | uVOPWKAqHpUg1K8MTo  | rs2153277  | 9.23                         | 8.81                      | -0.186               | 3.97                     | 7.87                          | 0.235                             | 8.7    | 0.375              | 7.68    | 8.455           | 8.724  | 8.969           | 9.572                   | Yes     |
| RUNX2   | uVOPWKAqHpUg1K8MTo  | rs1200426  | 9.23                         | 8.81                      | -0.186               | 3.97                     | 8.12                          | 0.235                             | 8.7    | 0.375              | 7.68    | 8.455           | 8.724  | 8.969           | 9.572                   | Yes     |
| RUNX2   | uVOPWKAqHpUg1K8MTo  | rs1200425  | 5.68                         | 5.43                      | 0.117                | 2.59                     | 8.31                          | 0.3925                            | 8.7    | 0.375              | 7.68    | 8.455           | 8.724  | 8.969           | 9.572                   | Yes     |
| RYBP    | Z90NV57rKB1LrgafmY  | rs6797249  | 7.9                          | 7.55                      | 0.158                | 2.2                      | 33.69                         | 0.1432                            | 10.18  | 0.44               | 8.385   | 9.922           | 10.229 | 10.464          | 11.307                  |         |
| RYBP    | Z90NV57rKB1LrgafmY  | rs12493016 | 8.31                         | 7.93                      | 0.164                | 2.9                      | -14.31                        | 0.1275                            | 10.18  | 0.44               | 8.385   | 9.922           | 10.229 | 10.464          | 11.307                  |         |
| RYBP    | Z90NV57rKB1LrgafmY  | rs2028240  | 7.27                         | 6.94                      | -0.145               | 1.75                     | -5.02                         | 0.42                              | 10.18  | 0.44               | 8.385   | 9.922           | 10.229 | 10.464          | 11.307                  |         |
| S100A13 | oSbQYvQlrxnUkyIU3k  | rs913859   | 5.24                         | 5.01                      | -0.103               | 0.87                     | 19.97                         | 0.1175                            | 7.347  | 0.203              | 7.11    | 7.191           | 7.3    | 7.457           | 8.239                   |         |
| SAMD10  | iFGqIV01eVe7p5kLPc  | rs6011248  | 3.37                         | 3.23                      | -0.063               | 4.28                     | 15.16                         | 0.1725                            | 7.664  | 0.327              | 7.171   | 7.389           | 7.626  | 7.855           | 8.748                   |         |
| SAMD10  | iFGqIV01eVe7p5kLPc  | rs2427590  | 3.37                         | 3.23                      | -0.063               | 4.28                     | 31.07                         | 0.1725                            | 7.664  | 0.327              | 7.171   | 7.389           | 7.626  | 7.855           | 8.748                   |         |
| SAMD3   | cWE4cL6CnR7FUkVJI   | rs7749850  | 5.21                         | 4.99                      | -0.103               | 2.98                     | 2.25                          | 0.45                              | 8.658  | 0.313              | 7.616   | 8.439           | 8.681  | 8.859           | 9.542                   |         |
| SAMD3   | cWE4cL6CnR7FUkVJI   | rs12194317 | 3.31                         | 3.17                      | -0.061               | 0.42                     | 7.25                          | 0.105                             | 8.658  | 0.313              | 7.616   | 8.439           | 8.681  | 8.859           | 9.542                   |         |
| SAMM50  | ouOm1L_jeowr17JYRU  | rs139051   | 3.47                         | 3.33                      | -0.064               | 0.88                     | -26.62                        | 0.35                              | 10.217 | 0.337              | 9.514   | 9.992           | 10.232 | 10.422          | 11.263                  |         |
| SAMM50  | ouOm1L_jeowr17JYRU  | rs2073082  | 3.97                         | 3.80                      | -0.076               | 0.9                      | 8.71                          | 0.196                             | 10.217 | 0.337              | 9.514   | 9.992           | 10.232 | 10.422          | 11.263                  |         |
| SAMM50  | ouOm1L_jeowr17JYRU  | rs6006467  | 4.66                         | 4.46                      | -0.089               | 1.96                     | -10.16                        | 0.1425                            | 10.217 | 0.337              | 9.514   | 9.992           | 10.232 | 10.422          | 11.263                  |         |
| SAMM50  | ouOm1L_jeowr17JYRU  | rs2294928  | 3.93                         | 3.76                      | 0.076                | 2.05                     | -9.56                         | 0.1775                            | 10.217 | 0.337              | 9.514   | 9.992           | 10.232 | 10.422          | 11.263                  |         |
| SAPS2   | QT.omNouWVmWL3a3Yk  | rs756014   | 4.76                         | 4.55                      | -0.098               | 1.77                     | 0.45                          | 0.3719                            | 7.187  | 0.065              | 7.108   | 7.142           | 7.169  | 7.217           | 7.512                   | Yes     |
| SARS2   | oUuoJKG3qf3r3KhKII  | rs10410544 | 5.41                         | 5.17                      | 0.107                | 1.51                     | -20.37                        | 0.48                              | 9.557  | 0.285              | 8.287   | 9.361           | 9.527  | 9.722           | 10.226                  |         |
| SARS2   | oUuoJKG3qf3r3KhKII  | rs4802998  | 7.03                         | 6.72                      | 0.141                | 2.25                     | -18.19                        | 0.4225                            | 9.557  | 0.285              | 8.287   | 9.361           | 9.527  | 9.722           | 10.226                  |         |
| SARS2   | oUuoJKG3qf3r3KhKII  | rs2099339  | 4.93                         | 4.72                      | -0.097               | 1.44                     | 4.21                          | 0.4372                            | 9.557  | 0.285              | 8.287   | 9.361           | 9.527  | 9.722           | 10.226                  |         |
| SARS2   | oUuoJKG3qf3r3KhKII  | rs8108375  | 3.78                         | 3.62                      | 0.075                | 1.32                     | 3.63                          | 0.1574                            | 9.557  | 0.285              | 8.287   | 9.361           | 9.527  | 9.722           | 10.226                  |         |
| SARS2   | oUuoJKG3qf3r3KhKII  | rs10416055 | 11.75                        | 11.21                     | 0.233                | 2.28                     | 13.95                         | 0.3875                            | 9.557  | 0.285              | 8.287   | 9.361           | 9.527  | 9.722           | 10.226                  |         |
| SARS2   | oUuoJKG3qf3r3KhKII  | rs12151188 | 7.37                         | 7.04                      | 0.147                | 0.46                     | 34                            | 0.3425                            | 9.557  | 0.285              | 8.287   | 9.361           | 9.527  | 9.722           | 10.226                  |         |
| SARS2   | oUuoJKG3qf3r3KhKII  | rs934421   | 3.86                         | 3.70                      | 0.073                | 0.21                     | 37.83                         | 0.405                             | 9.557  | 0.285              | 8.287   | 9.361           | 9.527  | 9.722           | 10.226                  |         |

| Symbol   | Lumi nuID          | SNP        | Population-based association p-value (-log10) | Population-based association p-value (-log10), GC adj. | % Variance Explained | Family-based association p-value (-log10) | Distance from transcript (kb) | MAF    | Transcript abundance (log2 scale) |                    |         |                 |        |                 | SNP mapping under probe |         |
|----------|--------------------|------------|-----------------------------------------------|--------------------------------------------------------|----------------------|-------------------------------------------|-------------------------------|--------|-----------------------------------|--------------------|---------|-----------------|--------|-----------------|-------------------------|---------|
|          |                    |            |                                               |                                                        |                      |                                           |                               |        | Mean                              | Standard Deviation | Minimum | 25th percentile | Median | 75th percentile |                         | Maximum |
| SBK1     | ZSJVV07fllFXU7v7A  | rs4255791  | 5.46                                          | 5.22                                                   | -0.111               | 1.72                                      | -29.04                        | 0.3475 | 10.654                            | 0.282              | 9.373   | 10.488          | 10.651 | 10.8            | 11.348                  |         |
| SCAND2   | 9dWh9CiPSAG1LkrqA4 | rs11635597 | 3.68                                          | 3.52                                                   | 0.071                | 2.22                                      | -9.01                         | 0.33   | 7.433                             | 0.242              | 7.114   | 7.272           | 7.38   | 7.527           | 8.794                   |         |
| SCAND2   | 9dWh9CiPSAG1LkrqA4 | rs11858419 | 4.63                                          | 4.43                                                   | -0.089               | 3.65                                      | -6.53                         | 0.1925 | 7.433                             | 0.242              | 7.114   | 7.272           | 7.38   | 7.527           | 8.794                   |         |
| SCAND2   | EgUstSrp0QIUf4p350 | rs3825877  | 4.75                                          | 4.55                                                   | 0.096                | 1.45                                      | -0.08                         | 0.4825 | 7.95                              | 0.227              | 7.15    | 7.802           | 7.928  | 8.095           | 8.759                   | Yes     |
| SCAND2   | 9dWh9CiPSAG1LkrqA4 | rs3825877  | 4.44                                          | 4.25                                                   | 0.089                | 3.74                                      | -0.08                         | 0.4825 | 7.433                             | 0.242              | 7.114   | 7.272           | 7.38   | 7.527           | 8.794                   |         |
| SCAND2   | EgUstSrp0QIUf4p350 | rs2292463  | 4.75                                          | 4.55                                                   | -0.096               | 1.48                                      | 1.04                          | 0.4825 | 7.95                              | 0.227              | 7.15    | 7.802           | 7.928  | 8.095           | 8.759                   | Yes     |
| SCAND2   | 9dWh9CiPSAG1LkrqA4 | rs2292463  | 4.44                                          | 4.25                                                   | -0.089               | 3.8                                       | 1.04                          | 0.4825 | 7.433                             | 0.242              | 7.114   | 7.272           | 7.38   | 7.527           | 8.794                   |         |
| SCAND2   | 9dWh9CiPSAG1LkrqA4 | rs2271431  | 3.68                                          | 3.52                                                   | -0.071               | 1.79                                      | 4.94                          | 0.33   | 7.433                             | 0.242              | 7.114   | 7.272           | 7.38   | 7.527           | 8.794                   |         |
| SCAND2   | EgUstSrp0QIUf4p350 | rs1107179  | 4.52                                          | 4.33                                                   | -0.091               | 1.34                                      | 14.38                         | 0.4849 | 7.95                              | 0.227              | 7.15    | 7.802           | 7.928  | 8.095           | 8.759                   | Yes     |
| SCAND2   | 9dWh9CiPSAG1LkrqA4 | rs1107179  | 4.3                                           | 4.12                                                   | -0.086               | 3.34                                      | 13.84                         | 0.4849 | 7.433                             | 0.242              | 7.114   | 7.272           | 7.38   | 7.527           | 8.794                   |         |
| SCAND2   | EgUstSrp0QIUf4p350 | rs2292462  | 5.28                                          | 5.05                                                   | -0.107               | 2.01                                      | 16.77                         | 0.4875 | 7.95                              | 0.227              | 7.15    | 7.802           | 7.928  | 8.095           | 8.759                   | Yes     |
| SCAND2   | 9dWh9CiPSAG1LkrqA4 | rs2292462  | 4.3                                           | 4.12                                                   | -0.086               | 3.66                                      | 16.23                         | 0.4875 | 7.433                             | 0.242              | 7.114   | 7.272           | 7.38   | 7.527           | 8.794                   |         |
| SCAPER   | BUIc34npwSP10kpeol | rs7171795  | 3.54                                          | 3.39                                                   | 0.065                | 1.28                                      | -31.36                        | 0.2875 | 8.124                             | 0.17               | 7.762   | 8.002           | 8.124  | 8.23            | 8.679                   |         |
| SCAPER   | BUIc34npwSP10kpeol | rs3866543  | 5.19                                          | 4.96                                                   | 0.097                | 1.07                                      | -10.93                        | 0.455  | 8.124                             | 0.17               | 7.762   | 8.002           | 8.124  | 8.23            | 8.679                   |         |
| SCAPER   | BUIc34npwSP10kpeol | rs11634019 | 8.97                                          | 8.56                                                   | -0.171               | 4.01                                      | -5.86                         | 0.3668 | 8.124                             | 0.17               | 7.762   | 8.002           | 8.124  | 8.23            | 8.679                   |         |
| SCAPER   | BUIc34npwSP10kpeol | rs1568083  | 5.44                                          | 5.20                                                   | 0.103                | 1.84                                      | 30.38                         | 0.19   | 8.124                             | 0.17               | 7.762   | 8.002           | 8.124  | 8.23            | 8.679                   |         |
| SCAPER   | BUIc34npwSP10kpeol | rs3765115  | 10.06                                         | 9.61                                                   | -0.192               | 4.19                                      | 33.18                         | 0.3975 | 8.124                             | 0.17               | 7.762   | 8.002           | 8.124  | 8.23            | 8.679                   |         |
| SCAPER   | BUIc34npwSP10kpeol | rs744336   | 7.13                                          | 6.81                                                   | 0.135                | 2.72                                      | 34.09                         | 0.4775 | 8.124                             | 0.17               | 7.762   | 8.002           | 8.124  | 8.23            | 8.679                   |         |
| SCAPER   | BUIc34npwSP10kpeol | rs4886493  | 9.66                                          | 9.22                                                   | 0.183                | 3.97                                      | 38.49                         | 0.39   | 8.124                             | 0.17               | 7.762   | 8.002           | 8.124  | 8.23            | 8.679                   |         |
| SCAPER   | BUIc34npwSP10kpeol | rs12907805 | 5.62                                          | 5.37                                                   | 0.106                | 1.27                                      | 50.07                         | 0.4425 | 8.124                             | 0.17               | 7.762   | 8.002           | 8.124  | 8.23            | 8.679                   |         |
| SCAPER   | BUIc34npwSP10kpeol | rs1607017  | 9.66                                          | 9.22                                                   | 0.183                | 4.29                                      | 85.93                         | 0.385  | 8.124                             | 0.17               | 7.762   | 8.002           | 8.124  | 8.23            | 8.679                   |         |
| SCAPER   | BUIc34npwSP10kpeol | rs157783   | 5.07                                          | 4.85                                                   | 0.096                | 1.23                                      | 124.7                         | 0.4025 | 8.124                             | 0.17               | 7.762   | 8.002           | 8.124  | 8.23            | 8.679                   |         |
| SCAPER   | BUIc34npwSP10kpeol | rs1587381  | 3.46                                          | 3.31                                                   | 0.063                | 0.69                                      | 129.08                        | 0.4825 | 8.124                             | 0.17               | 7.762   | 8.002           | 8.124  | 8.23            | 8.679                   |         |
| SCAPER   | BUIc34npwSP10kpeol | rs2469249  | 7.29                                          | 6.97                                                   | 0.138                | 2.37                                      | 131.53                        | 0.305  | 8.124                             | 0.17               | 7.762   | 8.002           | 8.124  | 8.23            | 8.679                   |         |
| SCAPER   | BUIc34npwSP10kpeol | rs1603856  | 5.32                                          | 5.09                                                   | -0.101               | 0.65                                      | 170.85                        | 0.1825 | 8.124                             | 0.17               | 7.762   | 8.002           | 8.124  | 8.23            | 8.679                   |         |
| SCAPER   | BUIc34npwSP10kpeol | rs2461870  | 7.94                                          | 7.58                                                   | -0.152               | 4.32                                      | 173.38                        | 0.42   | 8.124                             | 0.17               | 7.762   | 8.002           | 8.124  | 8.23            | 8.679                   |         |
| SCAPER   | BUIc34npwSP10kpeol | rs12441433 | 6.56                                          | 6.27                                                   | 0.125                | 2.95                                      | 175.48                        | 0.495  | 8.124                             | 0.17               | 7.762   | 8.002           | 8.124  | 8.23            | 8.679                   |         |
| SCAPER   | BUIc34npwSP10kpeol | rs920712   | 9.04                                          | 8.63                                                   | -0.175               | 3.69                                      | -142.22                       | 0.3869 | 8.124                             | 0.17               | 7.762   | 8.002           | 8.124  | 8.23            | 8.679                   |         |
| SCAPER   | BUIc34npwSP10kpeol | rs11855534 | 6.42                                          | 6.13                                                   | 0.123                | 1.72                                      | -24.63                        | 0.475  | 8.124                             | 0.17               | 7.762   | 8.002           | 8.124  | 8.23            | 8.679                   |         |
| SCAPER   | BUIc34npwSP10kpeol | rs11072632 | 4.93                                          | 4.72                                                   | 0.095                | 1.56                                      | -13.11                        | 0.202  | 8.124                             | 0.17               | 7.762   | 8.002           | 8.124  | 8.23            | 8.679                   |         |
| SCAPER   | BUIc34npwSP10kpeol | rs12595586 | 4.74                                          | 4.54                                                   | -0.089               | 1.82                                      | -3.98                         | 0.4225 | 8.124                             | 0.17               | 7.762   | 8.002           | 8.124  | 8.23            | 8.679                   |         |
| SCAPER   | BUIc34npwSP10kpeol | rs3812908  | 8.74                                          | 8.34                                                   | -0.171               | 2.45                                      | -0.03                         | 0.3934 | 8.124                             | 0.17               | 7.762   | 8.002           | 8.124  | 8.23            | 8.679                   |         |
| SCAPER   | BUIc34npwSP10kpeol | rs11637296 | 9.21                                          | 8.79                                                   | -0.177               | 3.42                                      | 31.69                         | 0.375  | 8.124                             | 0.17               | 7.762   | 8.002           | 8.124  | 8.23            | 8.679                   |         |
| SCARA5   | xKBJBHxp4QcJQzpXK0 | rs1870587  | 5.22                                          | 4.99                                                   | -0.097               | 2.02                                      | -12.62                        | 0.103  | 7.204                             | 0.09               | 7.112   | 7.144           | 7.17   | 7.233           | 7.651                   |         |
| SCARA5   | xKBJBHxp4QcJQzpXK0 | rs4537259  | 5.12                                          | 4.89                                                   | -0.095               | 1.85                                      | -9.44                         | 0.1025 | 7.204                             | 0.09               | 7.112   | 7.144           | 7.17   | 7.233           | 7.651                   |         |
| SCARA5   | xKBJBHxp4QcJQzpXK0 | rs898464   | 3.89                                          | 3.73                                                   | -0.072               | 1.73                                      | 2.08                          | 0.055  | 7.204                             | 0.09               | 7.112   | 7.144           | 7.17   | 7.233           | 7.651                   |         |
| SCGB3A1  | fNVuBRdMip1SC7unic | rs2453176  | 95.61                                         | 90.98                                                  | 0.896                | 7.41                                      | -41.31                        | 0.0875 | 7.506                             | 0.853              | 7.096   | 7.113           | 7.125  | 7.165           | 10.415                  |         |
| SCGB3A1  | fNVuBRdMip1SC7unic | rs11957360 | 4.85                                          | 4.64                                                   | 0.097                | 3.37                                      | -6.47                         | 0.4875 | 7.506                             | 0.853              | 7.096   | 7.113           | 7.125  | 7.165           | 10.415                  |         |
| SCGB3A1  | fNVuBRdMip1SC7unic | rs368686   | 10.76                                         | 10.27                                                  | 0.216                | 5.49                                      | -0.46                         | 0.31   | 7.506                             | 0.853              | 7.096   | 7.113           | 7.125  | 7.165           | 10.415                  |         |
| SCGB3A1  | fNVuBRdMip1SC7unic | rs307823   | 3.62                                          | 3.47                                                   | 0.069                | 4.4                                       | 33.62                         | 0.22   | 7.506                             | 0.853              | 7.096   | 7.113           | 7.125  | 7.165           | 10.415                  |         |
| SCGB3A1  | fNVuBRdMip1SC7unic | rs10085025 | 15.69                                         | 14.96                                                  | -0.297               | 5.52                                      | 42.3                          | 0.0854 | 7.506                             | 0.853              | 7.096   | 7.113           | 7.125  | 7.165           | 10.415                  |         |
| SCGB3A1  | fNVuBRdMip1SC7unic | rs12654563 | 16.4                                          | 15.63                                                  | -0.307               | 5.89                                      | 45.26                         | 0.0875 | 7.506                             | 0.853              | 7.096   | 7.113           | 7.125  | 7.165           | 10.415                  |         |
| SCGB3A1  | fNVuBRdMip1SC7unic | rs4700745  | 3.98                                          | 3.81                                                   | -0.076               | 1.63                                      | 46.97                         | 0.41   | 7.506                             | 0.853              | 7.096   | 7.113           | 7.125  | 7.165           | 10.415                  |         |
| SCGB3A1  | fNVuBRdMip1SC7unic | rs307806   | 8.68                                          | 8.29                                                   | -0.176               | 3.32                                      | 49.19                         | 0.1276 | 7.506                             | 0.853              | 7.096   | 7.113           | 7.125  | 7.165           | 10.415                  |         |
| SCN2A2   | 9QdSIAWM4ZfUbdRXY  | rs1541901  | 3.5                                           | 3.35                                                   | -0.068               | 0.67                                      | 48.86                         | 0.2592 | 7.149                             | 0.03               | 7.102   | 7.13            | 7.145  | 7.163           | 7.307                   |         |
| SCYL1BP1 | N3KrO.Rfj.pWf0u9Y  | rs16863369 | 3.48                                          | 3.33                                                   | -0.064               | 1.25                                      | -48.82                        | 0.1308 | 8.569                             | 0.3                | 7.263   | 8.439           | 8.598  | 8.779           | 9.104                   |         |
| SCYL1BP1 | N3KrO.Rfj.pWf0u9Y  | rs7515690  | 4.65                                          | 4.45                                                   | -0.085               | 0.26                                      | -33.2                         | 0.155  | 8.569                             | 0.3                | 7.263   | 8.439           | 8.598  | 8.779           | 9.104                   |         |
| SCYL1BP1 | N3KrO.Rfj.pWf0u9Y  | rs6676293  | 4.48                                          | 4.29                                                   | 0.082                | 0.34                                      | 6.33                          | 0.1508 | 8.569                             | 0.3                | 7.263   | 8.439           | 8.598  | 8.779           | 9.104                   |         |
| SEC61A2  | 6qRYnC3u5JPLFZ5fAE | rs2399786  | 3.33                                          | 3.19                                                   | -0.064               | 1.48                                      | 8.35                          | 0.48   | 7.39                              | 0.169              | 7.135   | 7.27            | 7.371  | 7.417           | 8.53                    |         |
| SELT     | oIJK_nDnOqv.FEvlPs | rs9840992  | 3.62                                          | 3.47                                                   | 0.07                 | 2.2                                       | -32.76                        | 0.3525 | 9.16                              | 0.318              | 8.12    | 8.972           | 9.197  | 9.383           | 9.817                   |         |
| SELT     | oIJK_nDnOqv.FEvlPs | rs9863120  | 3.48                                          | 3.34                                                   | 0.067                | 1.7                                       | -28.3                         | 0.3401 | 9.16                              | 0.318              | 8.12    | 8.972           | 9.197  | 9.383           | 9.817                   |         |
| SELT     | oIJK_nDnOqv.FEvlPs | rs10935809 | 3.91                                          | 3.75                                                   | 0.077                | 1.66                                      | -24.25                        | 0.19   | 9.16                              | 0.318              | 8.12    | 8.972           | 9.197  | 9.383           | 9.817                   |         |
| SELT     | oIJK_nDnOqv.FEvlPs | rs10935810 | 3.91                                          | 3.75                                                   | 0.077                | 1.51                                      | -15.37                        | 0.19   | 9.16                              | 0.318              | 8.12    | 8.972           | 9.197  | 9.383           | 9.817                   |         |
| SELT     | oIJK_nDnOqv.FEvlPs | rs1568585  | 3.81                                          | 3.65                                                   | -0.075               | 2.85                                      | 10.95                         | 0.2775 | 9.16                              | 0.318              | 8.12    | 8.972           | 9.197  | 9.383           | 9.817                   |         |
| SEMA3A   | xBKKFRg.iKkVKL4nk  | rs701307   | 3.48                                          | 3.33                                                   | -0.063               | 1.25                                      | -29.18                        | 0.165  | 7.128                             | 0.024              | 7.1     | 7.113           | 7.122  | 7.133           | 7.272                   |         |
| SEMA3A   | xBKKFRg.iKkVKL4nk  | rs3801615  | 3.51                                          | 3.36                                                   | 0.066                | 1.69                                      | -103.14                       | 0.4769 | 7.128                             | 0.024              | 7.1     | 7.113           | 7.122  | 7.133           | 7.272                   |         |
| SEMA3A   | xBKKFRg.iKkVKL4nk  | rs7804363  | 3.5                                           | 3.35                                                   | -0.064               | 2.66                                      | -101.22                       | 0.475  | 7.128                             | 0.024              | 7.1     | 7.113           | 7.122  | 7.133           | 7.272                   |         |
| SEMA3A   | xBKKFRg.iKkVKL4nk  | rs3823911  | 3.39                                          | 3.25                                                   | -0.062               | 2.66                                      | -91.64                        | 0.48   | 7.128                             | 0.024              | 7.1     | 7.113           | 7.122  | 7.133           | 7.272                   |         |
| SEMA3A   | xBKKFRg.iKkVKL4nk  | rs917090   | 3.39                                          | 3.25                                                   | -0.062               | 2.92                                      | -89.89                        | 0.48   | 7.128                             | 0.024              | 7.1     | 7.113           | 7.122  | 7.133           | 7.272                   |         |
| SEMA3A   | xBKKFRg.iKkVKL4nk  | rs464      | 5.07                                          | 4.85                                                   | -0.096               | 1.5                                       | -37.45                        | 0.2663 | 7.128                             | 0.024              | 7.1     | 7.113           | 7.122  | 7.133           | 7.272                   |         |
| SEMA3A   | xBKKFRg.iKkVKL4nk  | rs13224698 | 16.25                                         | 15.49                                                  | 0.305                | 1.82                                      | -14.8                         | 0.05   | 7.128                             | 0.024              | 7.1     | 7.113           | 7.122  | 7.133           | 7.272                   |         |
| SEMA3A   | xBKKFRg.iKkVKL4nk  | rs11976275 | 16.01                                         | 15.27                                                  | 0.307                | 2.87                                      | 11.52                         | 0.051  | 7.128                             | 0.024              | 7.1     | 7.113           | 7.122  | 7.133           | 7.272                   |         |

| Symbol   | Lumi nuID           | SNP        | Population-based             | Population-based                      | % Variance Explained | Family-based                 | Distance from transcript (kb) | MAF    | Mean   | Transcript abundance (log2 scale) |         |                 |        |                 | SNP mapping under probe |         |
|----------|---------------------|------------|------------------------------|---------------------------------------|----------------------|------------------------------|-------------------------------|--------|--------|-----------------------------------|---------|-----------------|--------|-----------------|-------------------------|---------|
|          |                     |            | association p-value (-log10) | association p-value (-log10), GC adj. |                      | association p-value (-log10) |                               |        |        | Standard Deviation                | Minimum | 25th percentile | Median | 75th percentile |                         | Maximum |
| SEN2     | oqde_X91oLeEcSb6Rl  | rs13072061 | 4.59                         | 4.39                                  | 0.091                | 0.86                         | 21.99                         | 0.2825 | 8.267  | 0.18                              | 7.782   | 8.161           | 8.277  | 8.381           | 8.794                   |         |
| SEN2     | oqde_X91oLeEcSb6Rl  | rs6784948  | 4.59                         | 4.39                                  | 0.091                | 0.86                         | -6.1                          | 0.2825 | 8.267  | 0.18                              | 7.782   | 8.161           | 8.277  | 8.381           | 8.794                   |         |
| SEN2     | oqde_X91oLeEcSb6Rl  | rs7638853  | 4.59                         | 4.39                                  | -0.091               | 1.06                         | 1.82                          | 0.28   | 8.267  | 0.18                              | 7.782   | 8.161           | 8.277  | 8.381           | 8.794                   |         |
| SERAC1   | NTFTiS0vVF3n9UJeaW  | rs13340445 | 3.56                         | 3.41                                  | 0.065                | 0.52                         | -26.29                        | 0.2175 | 7.496  | 0.139                             | 7.211   | 7.4             | 7.486  | 7.566           | 8.386                   |         |
| SERAC1   | NTFTiS0vVF3n9UJeaW  | rs11756587 | 7.55                         | 7.21                                  | 0.148                | 1.59                         | -16.29                        | 0.135  | 7.496  | 0.139                             | 7.211   | 7.4             | 7.486  | 7.566           | 8.386                   |         |
| SERAC1   | NTFTiS0vVF3n9UJeaW  | rs1124275  | 3.31                         | 3.17                                  | -0.06                | 1.37                         | 32.86                         | 0.14   | 7.496  | 0.139                             | 7.211   | 7.4             | 7.486  | 7.566           | 8.386                   |         |
| SERAC1   | NTFTiS0vVF3n9UJeaW  | rs644637   | 3.53                         | 3.38                                  | 0.065                | 1.39                         | 35.55                         | 0.3675 | 7.496  | 0.139                             | 7.211   | 7.4             | 7.486  | 7.566           | 8.386                   |         |
| SERPINB1 | QZcruSjd.BLJ.Cnje3o | rs316338   | 4.96                         | 4.75                                  | -0.092               | 3.17                         | 4.11                          | 0.3275 | 10.906 | 0.367                             | 9.623   | 10.644          | 10.872 | 11.083          | 12.137                  |         |
| SERPINB1 | QZcruSjd.BLJ.Cnje3o | rs316339   | 5.74                         | 5.48                                  | -0.106               | 4.53                         | -4.04                         | 0.285  | 10.906 | 0.367                             | 9.623   | 10.644          | 10.872 | 11.083          | 12.137                  |         |
| SERPINB6 | KFQul81uS66S9IDAqU  | rs318491   | 6.13                         | 5.86                                  | -0.118               | 2.33                         | -49.8                         | 0.41   | 10.822 | 0.494                             | 9.425   | 10.516          | 10.877 | 11.144          | 11.8                    |         |
| SERPINB6 | KFQul81uS66S9IDAqU  | rs318497   | 6.18                         | 5.90                                  | 0.121                | 1.82                         | -36.12                        | 0.4422 | 10.822 | 0.494                             | 9.425   | 10.516          | 10.877 | 11.144          | 11.8                    |         |
| SERPINB6 | KFQul81uS66S9IDAqU  | rs7759176  | 13.9                         | 13.25                                 | -0.267               | 3.75                         | -32.73                        | 0.2875 | 10.822 | 0.494                             | 9.425   | 10.516          | 10.877 | 11.144          | 11.8                    |         |
| SERPINB6 | KFQul81uS66S9IDAqU  | rs318449   | 7.25                         | 6.93                                  | -0.14                | 1.88                         | -15.94                        | 0.3525 | 10.822 | 0.494                             | 9.425   | 10.516          | 10.877 | 11.144          | 11.8                    |         |
| SERPINB6 | KFQul81uS66S9IDAqU  | rs318453   | 7.17                         | 6.85                                  | 0.139                | 1.63                         | -11.19                        | 0.3543 | 10.822 | 0.494                             | 9.425   | 10.516          | 10.877 | 11.144          | 11.8                    |         |
| SERPINB6 | KFQul81uS66S9IDAqU  | rs11242810 | 18.12                        | 17.27                                 | 0.335                | 4.16                         | -11.05                        | 0.2575 | 10.822 | 0.494                             | 9.425   | 10.516          | 10.877 | 11.144          | 11.8                    |         |
| SERPINB6 | KFQul81uS66S9IDAqU  | rs318427   | 3.43                         | 3.28                                  | 0.063                | 1.01                         | -3.06                         | 0.19   | 10.822 | 0.494                             | 9.425   | 10.516          | 10.877 | 11.144          | 11.8                    |         |
| SERPINB9 | uSEB7.USS_BT1E9UUK  | rs405616   | 3.81                         | 3.65                                  | -0.069               | 1.29                         | -44.17                        | 0.46   | 7.887  | 0.289                             | 7.143   | 7.713           | 7.902  | 8.069           | 8.86                    |         |
| SERPINB9 | uSEB7.USS_BT1E9UUK  | rs9503317  | 4.4                          | 4.21                                  | 0.078                | 1.45                         | -39.93                        | 0.1925 | 7.887  | 0.289                             | 7.143   | 7.713           | 7.902  | 8.069           | 8.86                    |         |
| SERPINB9 | uSEB7.USS_BT1E9UUK  | rs412303   | 7.46                         | 7.13                                  | -0.139               | 3.2                          | -33.14                        | 0.3744 | 7.887  | 0.289                             | 7.143   | 7.713           | 7.902  | 8.069           | 8.86                    |         |
| SERPINB9 | uSEB7.USS_BT1E9UUK  | rs380779   | 8.54                         | 8.16                                  | -0.164               | 3.74                         | -23.21                        | 0.3325 | 7.887  | 0.289                             | 7.143   | 7.713           | 7.902  | 8.069           | 8.86                    |         |
| SERPINB9 | uSEB7.USS_BT1E9UUK  | rs6932052  | 11.36                        | 10.84                                 | 0.21                 | 4.88                         | -18.47                        | 0.3425 | 7.887  | 0.289                             | 7.143   | 7.713           | 7.902  | 8.069           | 8.86                    |         |
| SERPINB9 | uSEB7.USS_BT1E9UUK  | rs12530071 | 11.86                        | 11.31                                 | 0.224                | 3.5                          | -1.44                         | 0.2125 | 7.887  | 0.289                             | 7.143   | 7.713           | 7.902  | 8.069           | 8.86                    |         |
| SERPINB9 | uSEB7.USS_BT1E9UUK  | rs318477   | 11.23                        | 10.72                                 | 0.217                | 5.09                         | 0.15                          | 0.4742 | 7.887  | 0.289                             | 7.143   | 7.713           | 7.902  | 8.069           | 8.86                    |         |
| SERPINB9 | uSEB7.USS_BT1E9UUK  | rs1052886  | 6.55                         | 6.26                                  | -0.123               | 1.65                         | 2.69                          | 0.2    | 7.887  | 0.289                             | 7.143   | 7.713           | 7.902  | 8.069           | 8.86                    |         |
| SERPINC1 | I56W9nAVQ5rh.QpQSk  | rs6703547  | 3.76                         | 3.60                                  | 0.067                | 1.61                         | 21.34                         | 0.1075 | 7.131  | 0.023                             | 7.1     | 7.117           | 7.126  | 7.137           | 7.288                   |         |
| SERPINE2 | Qt_chCvnuS717Rx60   | rs13396978 | 5.26                         | 5.03                                  | -0.106               | 1.91                         | 20.34                         | 0.2175 | 9.307  | 0.562                             | 7.732   | 8.923           | 9.304  | 9.671           | 10.723                  |         |
| SERPINE2 | Qt_chCvnuS717Rx60   | rs3795877  | 6.93                         | 6.62                                  | 0.143                | 1.99                         | 26.3                          | 0.2125 | 9.307  | 0.562                             | 7.732   | 8.923           | 9.304  | 9.671           | 10.723                  |         |
| SERPINE2 | Qt_chCvnuS717Rx60   | rs2037755  | 6.9                          | 6.59                                  | -0.144               | 4.47                         | -20.69                        | 0.455  | 9.307  | 0.562                             | 7.732   | 8.923           | 9.304  | 9.671           | 10.723                  |         |
| SERPINE2 | Qt_chCvnuS717Rx60   | rs13008520 | 3.65                         | 3.49                                  | -0.069               | 2.61                         | -14.61                        | 0.1375 | 9.307  | 0.562                             | 7.732   | 8.923           | 9.304  | 9.671           | 10.723                  |         |
| SERPINE2 | Qt_chCvnuS717Rx60   | rs10194024 | 13.45                        | 12.83                                 | 0.268                | 4.57                         | -13.15                        | 0.4275 | 9.307  | 0.562                             | 7.732   | 8.923           | 9.304  | 9.671           | 10.723                  |         |
| SERPINE2 | Qt_chCvnuS717Rx60   | rs920251   | 23.35                        | 22.25                                 | -0.424               | 5.71                         | -11.05                        | 0.3275 | 9.307  | 0.562                             | 7.732   | 8.923           | 9.304  | 9.671           | 10.723                  |         |
| SERPINE2 | Qt_chCvnuS717Rx60   | rs6719480  | 14.11                        | 13.45                                 | 0.275                | 2.46                         | -10.56                        | 0.1975 | 9.307  | 0.562                             | 7.732   | 8.923           | 9.304  | 9.671           | 10.723                  |         |
| SERPINE2 | Qt_chCvnuS717Rx60   | rs1438831  | 20.7                         | 19.72                                 | 0.386                | 5.4                          | 2.32                          | 0.315  | 9.307  | 0.562                             | 7.732   | 8.923           | 9.304  | 9.671           | 10.723                  |         |
| SERPINE2 | Qt_chCvnuS717Rx60   | rs282254   | 14.01                        | 13.36                                 | -0.277               | 4.81                         | 3.35                          | 0.4275 | 9.307  | 0.562                             | 7.732   | 8.923           | 9.304  | 9.671           | 10.723                  |         |
| SERPINE2 | Qt_chCvnuS717Rx60   | rs282258   | 7.97                         | 7.61                                  | 0.157                | 3.17                         | 10.81                         | 0.4015 | 9.307  | 0.562                             | 7.732   | 8.923           | 9.304  | 9.671           | 10.723                  |         |
| SERPINE2 | Qt_chCvnuS717Rx60   | rs4674860  | 9.72                         | 9.27                                  | 0.195                | 3.91                         | 17.82                         | 0.4375 | 9.307  | 0.562                             | 7.732   | 8.923           | 9.304  | 9.671           | 10.723                  |         |
| SERPINE2 | Qt_chCvnuS717Rx60   | rs4673085  | 4.03                         | 3.86                                  | -0.078               | 2.58                         | 21.42                         | 0.1475 | 9.307  | 0.562                             | 7.732   | 8.923           | 9.304  | 9.671           | 10.723                  |         |
| SERPINE2 | Qt_chCvnuS717Rx60   | rs2196661  | 18.73                        | 17.85                                 | -0.352               | 4.84                         | 21.85                         | 0.3425 | 9.307  | 0.562                             | 7.732   | 8.923           | 9.304  | 9.671           | 10.723                  |         |
| SERPINE2 | Qt_chCvnuS717Rx60   | rs12694628 | 17.94                        | 17.10                                 | 0.338                | 3.7                          | 25.67                         | 0.3325 | 9.307  | 0.562                             | 7.732   | 8.923           | 9.304  | 9.671           | 10.723                  |         |
| SESN1    | ZXhHoqSe37k8fu9UkU  | rs2273669  | 7.99                         | 7.63                                  | 0.157                | 3.32                         | -22.46                        | 0.1225 | 9.976  | 0.469                             | 8.38    | 9.657           | 9.955  | 10.245          | 11.37                   |         |
| SESN1    | ZXhHoqSe37k8fu9UkU  | rs10872027 | 7.99                         | 7.63                                  | -0.157               | 3.32                         | -18.11                        | 0.1225 | 9.976  | 0.469                             | 8.38    | 9.657           | 9.955  | 10.245          | 11.37                   |         |
| SESN1    | ZXhHoqSe37k8fu9UkU  | rs1887414  | 7.99                         | 7.63                                  | -0.157               | 3.32                         | -14.91                        | 0.1225 | 9.976  | 0.469                             | 8.38    | 9.657           | 9.955  | 10.245          | 11.37                   |         |
| SESN1    | ZXhHoqSe37k8fu9UkU  | rs2273668  | 8.71                         | 8.32                                  | 0.17                 | 3.99                         | 15.87                         | 0.11   | 9.976  | 0.469                             | 8.38    | 9.657           | 9.955  | 10.245          | 11.37                   |         |
| SESN1    | ZXhHoqSe37k8fu9UkU  | rs12197912 | 8.85                         | 8.45                                  | 0.178                | 3.17                         | 30.5                          | 0.1108 | 9.976  | 0.469                             | 8.38    | 9.657           | 9.955  | 10.245          | 11.37                   |         |
| SESN1    | ZXhHoqSe37k8fu9UkU  | rs12208578 | 9.12                         | 8.71                                  | -0.179               | 4.02                         | -45.53                        | 0.1125 | 9.976  | 0.469                             | 8.38    | 9.657           | 9.955  | 10.245          | 11.37                   |         |
| SESTD1   | xXgjh_38qjp40lKTE   | rs340348   | 4.5                          | 4.30                                  | 0.094                | 1.36                         | -40.75                        | 0.25   | 7.128  | 0.017                             | 7.1     | 7.116           | 7.124  | 7.137           | 7.195                   |         |
| SETD4    | ZlloRe5HZ1sXoXng0w  | rs2835223  | 3.61                         | 3.46                                  | -0.07                | 0.6                          | -46.17                        | 0.3266 | 7.759  | 0.165                             | 7.368   | 7.634           | 7.748  | 7.882           | 8.175                   |         |
| SETD4    | ZlloRe5HZ1sXoXng0w  | rs2835261  | 4.17                         | 3.99                                  | 0.082                | 0.93                         | 11.92                         | 0.2925 | 7.759  | 0.165                             | 7.368   | 7.634           | 7.748  | 7.882           | 8.175                   |         |
| SETD4    | ZlloRe5HZ1sXoXng0w  | rs9024     | 7.05                         | 6.74                                  | 0.145                | 2.83                         | -6.37                         | 0.1301 | 7.759  | 0.165                             | 7.368   | 7.634           | 7.748  | 7.882           | 8.175                   |         |
| SETD4    | ZlloRe5HZ1sXoXng0w  | rs2835272  | 6.81                         | 6.51                                  | 0.138                | 2.76                         | 1.23                          | 0.1275 | 7.759  | 0.165                             | 7.368   | 7.634           | 7.748  | 7.882           | 8.175                   |         |
| SETD4    | ZlloRe5HZ1sXoXng0w  | rs735142   | 6.35                         | 6.07                                  | 0.127                | 1.93                         | 8.48                          | 0.155  | 7.759  | 0.165                             | 7.368   | 7.634           | 7.748  | 7.882           | 8.175                   |         |
| SF1      | ZrkvOfKLCBLVS1JJRU  | rs477549   | 7.41                         | 7.08                                  | -0.147               | 2.24                         | -16.43                        | 0.135  | 8.696  | 0.696                             | 7.302   | 8.215           | 8.62   | 9.114           | 10.709                  |         |
| SF1      | ZrkvOfKLCBLVS1JJRU  | rs523200   | 8.39                         | 8.01                                  | 0.165                | 2.14                         | -10.93                        | 0.1375 | 8.696  | 0.696                             | 7.302   | 8.215           | 8.62   | 9.114           | 10.709                  |         |
| SF1      | HmgiiWegUIRDoEghLg  | rs523200   | 3.72                         | 3.56                                  | 0.069                | 0.71                         | -10.93                        | 0.1375 | 7.593  | 0.31                              | 7.119   | 7.358           | 7.546  | 7.781           | 8.499                   | Yes     |
| SF1      | ZrkvOfKLCBLVS1JJRU  | rs474707   | 7.76                         | 7.41                                  | 0.153                | 2.25                         | 0.63                          | 0.1325 | 8.696  | 0.696                             | 7.302   | 8.215           | 8.62   | 9.114           | 10.709                  |         |
| SF1      | ZrkvOfKLCBLVS1JJRU  | rs606458   | 8.39                         | 8.01                                  | -0.165               | 2.14                         | 0.15                          | 0.1375 | 8.696  | 0.696                             | 7.302   | 8.215           | 8.62   | 9.114           | 10.709                  |         |
| SF1      | HmgiiWegUIRDoEghLg  | rs606458   | 3.72                         | 3.56                                  | -0.069               | 0.71                         | 0.15                          | 0.1375 | 7.593  | 0.31                              | 7.119   | 7.358           | 7.546  | 7.781           | 8.499                   | Yes     |
| SF1      | ZrkvOfKLCBLVS1JJRU  | rs669976   | 6.54                         | 6.26                                  | -0.13                | 2.04                         | 27.35                         | 0.1294 | 8.696  | 0.696                             | 7.302   | 8.215           | 8.62   | 9.114           | 10.709                  |         |
| SF1      | HmgiiWegUIRDoEghLg  | rs669976   | 3.35                         | 3.21                                  | -0.062               | 0.79                         | 27.35                         | 0.1294 | 7.593  | 0.31                              | 7.119   | 7.358           | 7.546  | 7.781           | 8.499                   | Yes     |
| SF1      | ZrkvOfKLCBLVS1JJRU  | rs524386   | 5.28                         | 5.05                                  | -0.104               | 2.69                         | 38.72                         | 0.135  | 8.696  | 0.696                             | 7.302   | 8.215           | 8.62   | 9.114           | 10.709                  |         |
| SF3A1    | 6LnXvkoeeoASuu6h8l  | rs2108093  | 11.19                        | 10.68                                 | -0.217               | 4.69                         | -48.59                        | 0.16   | 9.476  | 0.276                             | 8.622   | 9.295           | 9.473  | 9.651           | 10.147                  | Yes     |
| SF3A1    | 6LnXvkoeeoASuu6h8l  | rs4339043  | 11.19                        | 10.68                                 | -0.217               | 4.69                         | 7.93                          | 0.16   | 9.476  | 0.276                             | 8.622   | 9.295           | 9.473  | 9.651           | 10.147                  | Yes     |

| Symbol  | Lumi nuID          | SNP        | Population-based association |         | % Variance Explained | Family-based association |                               | Transcript abundance (log2 scale) |        |                    |         |                 |        |                 | SNP mapping under probe |         |
|---------|--------------------|------------|------------------------------|---------|----------------------|--------------------------|-------------------------------|-----------------------------------|--------|--------------------|---------|-----------------|--------|-----------------|-------------------------|---------|
|         |                    |            | p-value (-log10)             | GC adj. |                      | p-value (-log10)         | Distance from transcript (kb) | MAF                               | Mean   | Standard Deviation | Minimum | 25th percentile | Median | 75th percentile |                         | Maximum |
| SF3A1   | 6LnXvkoeeoASuu6h8l | rs737950   | 11.19                        | 10.68   | -0.217               | 4.69                     | 4.38                          | 0.16                              | 9.476  | 0.276              | 8.622   | 9.295           | 9.473  | 9.651           | 10.147                  | Yes     |
| SF3A1   | 6LnXvkoeeoASuu6h8l | rs715504   | 7.43                         | 7.09    | 0.146                | 2.12                     | 39.2                          | 0.115                             | 9.476  | 0.276              | 8.622   | 9.295           | 9.473  | 9.651           | 10.147                  | Yes     |
| SF3A1   | 6LnXvkoeeoASuu6h8l | rs4820844  | 5.04                         | 4.82    | -0.1                 | 2.2                      | 42.3                          | 0.2575                            | 9.476  | 0.276              | 8.622   | 9.295           | 9.473  | 9.651           | 10.147                  | Yes     |
| SFXN4   | EioGvouqNpeYcJHuA0 | rs2297696  | 7.02                         | 6.71    | -0.144               | 4.05                     | -8.74                         | 0.415                             | 9.109  | 0.268              | 8.468   | 8.954           | 9.104  | 9.265           | 9.89                    |         |
| SFXN4   | EioGvouqNpeYcJHuA0 | rs2275111  | 14.25                        | 13.59   | -0.286               | 4.62                     | -7.76                         | 0.4375                            | 9.109  | 0.268              | 8.468   | 8.954           | 9.104  | 9.265           | 9.89                    |         |
| SFXN4   | EioGvouqNpeYcJHuA0 | rs10886406 | 10.01                        | 9.55    | -0.199               | 3.04                     | -2.9                          | 0.2275                            | 9.109  | 0.268              | 8.468   | 8.954           | 9.104  | 9.265           | 9.89                    |         |
| SFXN4   | EioGvouqNpeYcJHuA0 | rs1108472  | 3.84                         | 3.68    | 0.074                | 1.97                     | 29.15                         | 0.4                               | 9.109  | 0.268              | 8.468   | 8.954           | 9.104  | 9.265           | 9.89                    |         |
| SFXN4   | EioGvouqNpeYcJHuA0 | rs11198819 | 10.59                        | 10.11   | 0.211                | 2.88                     | 35.5                          | 0.265                             | 9.109  | 0.268              | 8.468   | 8.954           | 9.104  | 9.265           | 9.89                    |         |
| SFXN4   | EioGvouqNpeYcJHuA0 | rs7923896  | 3.36                         | 3.22    | -0.063               | 1.68                     | 40.79                         | 0.4                               | 9.109  | 0.268              | 8.468   | 8.954           | 9.104  | 9.265           | 9.89                    |         |
| SGCG    | iupER4u_L5bui8Ozhk | rs7995077  | 3.51                         | 3.36    | -0.068               | 1.79                     | -71.49                        | 0.475                             | 7.136  | 0.02               | 7.102   | 7.123           | 7.132  | 7.143           | 7.248                   |         |
| SGIP1   | fHdl6VXEkt674L9.gy | rs474409   | 4.66                         | 4.46    | -0.092               | 3.27                     | 48.52                         | 0.1625                            | 7.106  | 0.008              | 7.093   | 7.101           | 7.106  | 7.11            | 7.142                   |         |
| SH2D3C  | 9aZziC9kCtdHle1RCc | rs514024   | 3.45                         | 3.31    | -0.065               | 1.36                     | 3.04                          | 0.42                              | 8.605  | 0.465              | 7.13    | 8.254           | 8.575  | 8.84            | 10                      |         |
| SH2D4A  | fFJJSSipOoSvVRCXw  | rs3802329  | 3.93                         | 3.76    | -0.074               | 2.35                     | 13.41                         | 0.39                              | 7.203  | 0.055              | 7.113   | 7.161           | 7.189  | 7.238           | 7.368                   |         |
| SH3BP1  | 0ECqTqXUI.IRC5dLIQ | rs732857   | 9.5                          | 9.07    | 0.188                | 1.44                     | 8.8                           | 0.4325                            | 9.269  | 0.474              | 8.299   | 8.949           | 9.195  | 9.481           | 11.044                  |         |
| SH3BP1  | 0ECqTqXUI.IRC5dLIQ | rs713835   | 7.66                         | 7.31    | -0.154               | 1.81                     | 12.61                         | 0.34                              | 9.269  | 0.474              | 8.299   | 8.949           | 9.195  | 9.481           | 11.044                  |         |
| SH3BP1  | 0ECqTqXUI.IRC5dLIQ | rs4820294  | 7.25                         | 6.93    | 0.152                | 1.45                     | 19                            | 0.3359                            | 9.269  | 0.474              | 8.299   | 8.949           | 9.195  | 9.481           | 11.044                  |         |
| SH3BP1  | 0ECqTqXUI.IRC5dLIQ | rs929039   | 7.17                         | 6.85    | 0.146                | 1.53                     | 19.47                         | 0.3442                            | 9.269  | 0.474              | 8.299   | 8.949           | 9.195  | 9.481           | 11.044                  |         |
| SH3BP1  | 0ECqTqXUI.IRC5dLIQ | rs2899292  | 3.8                          | 3.64    | -0.074               | 0.06                     | 25.67                         | 0.3275                            | 9.269  | 0.474              | 8.299   | 8.949           | 9.195  | 9.481           | 11.044                  |         |
| SH3BP1  | 0ECqTqXUI.IRC5dLIQ | rs12627973 | 4.48                         | 4.28    | -0.089               | 0.54                     | 44.65                         | 0.2375                            | 9.269  | 0.474              | 8.299   | 8.949           | 9.195  | 9.481           | 11.044                  |         |
| SH3YL1  | 6qnE.vT9SSyTAFGuE4 | rs2290911  | 6.64                         | 6.34    | -0.136               | 3.52                     | 6.76                          | 0.34                              | 9.668  | 0.877              | 7.568   | 9.068           | 9.567  | 10.287          | 11.716                  |         |
| SH3YL1  | 6qnE.vT9SSyTAFGuE4 | rs3791221  | 6.64                         | 6.34    | -0.136               | 3.52                     | 8.78                          | 0.34                              | 9.668  | 0.877              | 7.568   | 9.068           | 9.567  | 10.287          | 11.716                  |         |
| SH3YL1  | 6qnE.vT9SSyTAFGuE4 | rs4455191  | 3.48                         | 3.34    | -0.069               | 1.83                     | -7.88                         | 0.3618                            | 9.668  | 0.877              | 7.568   | 9.068           | 9.567  | 10.287          | 11.716                  |         |
| SH3YL1  | 6qnE.vT9SSyTAFGuE4 | rs6742672  | 4.03                         | 3.86    | -0.079               | 2.04                     | 37.63                         | 0.3925                            | 9.668  | 0.877              | 7.568   | 9.068           | 9.567  | 10.287          | 11.716                  |         |
| SHD     | uf_LXalSDbNUCV1Tpc | rs4807567  | 4.36                         | 4.17    | -0.082               | 0.95                     | -1.16                         | 0.4648                            | 7.273  | 0.185              | 7.114   | 7.142           | 7.213  | 7.326           | 8.21                    |         |
| SHISA2  | ZVEe9_P13d.SiOEPhs | rs9319269  | 3.44                         | 3.29    | -0.063               | 1.97                     | -43.2                         | 0.33                              | 7.319  | 0.16               | 7.112   | 7.193           | 7.272  | 7.428           | 7.864                   |         |
| SHISA2  | ZVEe9_P13d.SiOEPhs | rs800838   | 4.38                         | 4.19    | -0.082               | 2.33                     | -25.84                        | 0.335                             | 7.319  | 0.16               | 7.112   | 7.193           | 7.272  | 7.428           | 7.864                   |         |
| SHISA2  | ZVEe9_P13d.SiOEPhs | rs1048789  | 4.62                         | 4.42    | -0.088               | 1.69                     | -24.04                        | 0.4175                            | 7.319  | 0.16               | 7.112   | 7.193           | 7.272  | 7.428           | 7.864                   |         |
| SHISA2  | ZVEe9_P13d.SiOEPhs | rs9551232  | 4.11                         | 3.93    | -0.081               | 2.69                     | -17.8                         | 0.445                             | 7.319  | 0.16               | 7.112   | 7.193           | 7.272  | 7.428           | 7.864                   |         |
| SHISA2  | ZVEe9_P13d.SiOEPhs | rs17416101 | 3.96                         | 3.80    | -0.076               | 3.02                     | -16.52                        | 0.4675                            | 7.319  | 0.16               | 7.112   | 7.193           | 7.272  | 7.428           | 7.864                   |         |
| SHISA2  | ZVEe9_P13d.SiOEPhs | rs1055252  | 3.55                         | 3.40    | -0.067               | 2.63                     | 0.19                          | 0.1975                            | 7.319  | 0.16               | 7.112   | 7.193           | 7.272  | 7.428           | 7.864                   |         |
| SHMT1   | BUp.XnUXIMFB1dWw0o | rs7207123  | 9.16                         | 8.75    | -0.183               | 1.83                     | -22.64                        | 0.3575                            | 9.078  | 0.346              | 7.973   | 8.853           | 9.066  | 9.288           | 9.916                   |         |
| SHMT1   | BUp.XnUXIMFB1dWw0o | rs8080966  | 7.15                         | 6.83    | 0.148                | 1.93                     | -10.51                        | 0.3351                            | 9.078  | 0.346              | 7.973   | 8.853           | 9.066  | 9.288           | 9.916                   |         |
| SHMT1   | BUp.XnUXIMFB1dWw0o | rs1563632  | 9.38                         | 8.95    | -0.19                | 2.65                     | -10.42                        | 0.335                             | 9.078  | 0.346              | 7.973   | 8.853           | 9.066  | 9.288           | 9.916                   |         |
| SHMT1   | BUp.XnUXIMFB1dWw0o | rs921986   | 9.16                         | 8.75    | 0.183                | 1.82                     | -4.11                         | 0.3575                            | 9.078  | 0.346              | 7.973   | 8.853           | 9.066  | 9.288           | 9.916                   |         |
| SHMT1   | BUp.XnUXIMFB1dWw0o | rs12952556 | 7.52                         | 7.18    | -0.151               | 1.57                     | 0.61                          | 0.3425                            | 9.078  | 0.346              | 7.973   | 8.853           | 9.066  | 9.288           | 9.916                   |         |
| SIDT1   | ipJ3u3iC9xPhSIV__U | rs3928555  | 6.68                         | 6.38    | -0.129               | 1.09                     | -43.27                        | 0.355                             | 8.678  | 0.287              | 7.655   | 8.486           | 8.662  | 8.868           | 9.34                    |         |
| SIDT1   | ipJ3u3iC9xPhSIV__U | rs2399488  | 3.55                         | 3.40    | -0.066               | 0.92                     | 19.91                         | 0.36                              | 8.678  | 0.287              | 7.655   | 8.486           | 8.662  | 8.868           | 9.34                    |         |
| SIDT1   | ipJ3u3iC9xPhSIV__U | rs1513287  | 3.7                          | 3.55    | 0.068                | 0.98                     | 20.71                         | 0.365                             | 8.678  | 0.287              | 7.655   | 8.486           | 8.662  | 8.868           | 9.34                    |         |
| SIDT1   | ipJ3u3iC9xPhSIV__U | rs7611694  | 3.64                         | 3.48    | 0.067                | 0.34                     | 24.13                         | 0.4                               | 8.678  | 0.287              | 7.655   | 8.486           | 8.662  | 8.868           | 9.34                    |         |
| SIRPB2  | BQnr164EzeFAqOO610 | rs1535883  | 5.01                         | 4.80    | 0.101                | 1.67                     | 3.02                          | 0.3675                            | 8.938  | 0.504              | 7.113   | 8.687           | 9.003  | 9.255           | 10.069                  |         |
| SIRPB2  | BQnr164EzeFAqOO610 | rs2318044  | 4.24                         | 4.06    | -0.084               | 0.59                     | 4.49                          | 0.42                              | 8.938  | 0.504              | 7.113   | 8.687           | 9.003  | 9.255           | 10.069                  |         |
| SIRPB2  | BQnr164EzeFAqOO610 | rs17770331 | 5.52                         | 5.27    | -0.111               | 2.56                     | 5.51                          | 0.24                              | 8.938  | 0.504              | 7.113   | 8.687           | 9.003  | 9.255           | 10.069                  |         |
| SIRPB2  | BQnr164EzeFAqOO610 | rs6043583  | 5.82                         | 5.57    | -0.115               | 1.74                     | 0.77                          | 0.3216                            | 8.938  | 0.504              | 7.113   | 8.687           | 9.003  | 9.255           | 10.069                  |         |
| SIRPB2  | BQnr164EzeFAqOO610 | rs4814413  | 6.02                         | 5.75    | -0.122               | 2.4                      | 3.9                           | 0.2437                            | 8.938  | 0.504              | 7.113   | 8.687           | 9.003  | 9.255           | 10.069                  |         |
| SIRPB2  | BQnr164EzeFAqOO610 | rs6110838  | 6.23                         | 5.96    | 0.127                | 1.74                     | 7.1                           | 0.4625                            | 8.938  | 0.504              | 7.113   | 8.687           | 9.003  | 9.255           | 10.069                  |         |
| SIRPB2  | BQnr164EzeFAqOO610 | rs6135736  | 3.36                         | 3.22    | -0.066               | 1.88                     | 49.05                         | 0.2113                            | 8.938  | 0.504              | 7.113   | 8.687           | 9.003  | 9.255           | 10.069                  |         |
| SIRT6   | QV5RFUI3h_e77UiuKc | rs2240702  | 4.02                         | 3.85    | 0.08                 | 1.25                     | -14.23                        | 0.1036                            | 7.292  | 0.162              | 7.125   | 7.18            | 7.246  | 7.337           | 8.166                   |         |
| SIRT6   | QV5RFUI3h_e77UiuKc | rs350852   | 3.54                         | 3.39    | 0.067                | 1.32                     | -4.11                         | 0.0975                            | 7.292  | 0.162              | 7.125   | 7.18            | 7.246  | 7.337           | 8.166                   |         |
| SIRT6   | QV5RFUI3h_e77UiuKc | rs350844   | 3.31                         | 3.17    | -0.062               | 1.05                     | 2.94                          | 0.0975                            | 7.292  | 0.162              | 7.125   | 7.18            | 7.246  | 7.337           | 8.166                   |         |
| SIRT6   | QV5RFUI3h_e77UiuKc | rs4807546  | 3.31                         | 3.17    | -0.062               | 1.14                     | -0.54                         | 0.0975                            | 7.292  | 0.162              | 7.125   | 7.18            | 7.246  | 7.337           | 8.166                   |         |
| SIRT6   | QV5RFUI3h_e77UiuKc | rs3760905  | 3.75                         | 3.59    | 0.072                | 1.72                     | 0.34                          | 0.1162                            | 7.292  | 0.162              | 7.125   | 7.18            | 7.246  | 7.337           | 8.166                   |         |
| SIVA    | ZN6rJIT5e9dObmJbo4 | rs4983382  | 5.05                         | 4.83    | -0.1                 | 0.38                     | -30                           | 0.2374                            | 10.966 | 0.347              | 8.859   | 10.755          | 10.992 | 11.184          | 11.883                  |         |
| SIVA    | ZN6rJIT5e9dObmJbo4 | rs2498804  | 3.92                         | 3.76    | 0.077                | 0.8                      | 7.1                           | 0.3096                            | 10.966 | 0.347              | 8.859   | 10.755          | 10.992 | 11.184          | 11.883                  |         |
| SIX5    | 0lftdPNaVIUCPV01eo | rs10415988 | 7                            | 6.68    | 0.131                | 3.1                      | -21.34                        | 0.47                              | 7.354  | 0.137              | 7.139   | 7.26            | 7.326  | 7.421           | 7.814                   |         |
| SIX5    | 0lftdPNaVIUCPV01eo | rs725660   | 4.41                         | 4.22    | 0.082                | 2.67                     | -5.76                         | 0.351                             | 7.354  | 0.137              | 7.139   | 7.26            | 7.326  | 7.421           | 7.814                   |         |
| SIX5    | 0lftdPNaVIUCPV01eo | rs8109951  | 4.49                         | 4.29    | -0.083               | 3.01                     | 17.19                         | 0.3525                            | 7.354  | 0.137              | 7.139   | 7.26            | 7.326  | 7.421           | 7.814                   |         |
| SIX5    | 0lftdPNaVIUCPV01eo | rs1865116  | 6.73                         | 6.43    | -0.125               | 2.93                     | 22.2                          | 0.4698                            | 7.354  | 0.137              | 7.139   | 7.26            | 7.326  | 7.421           | 7.814                   |         |
| SIX5    | 0lftdPNaVIUCPV01eo | rs1548029  | 4.52                         | 4.33    | -0.084               | 2.49                     | 36.89                         | 0.3467                            | 7.354  | 0.137              | 7.139   | 7.26            | 7.326  | 7.421           | 7.814                   |         |
| SIX5    | 0lftdPNaVIUCPV01eo | rs4514788  | 3.45                         | 3.31    | -0.062               | 0.52                     | 45.28                         | 0.304                             | 7.354  | 0.137              | 7.139   | 7.26            | 7.326  | 7.421           | 7.814                   |         |
| SLC10A7 | BcYgR.3u.VU5bXtE10 | rs13149037 | 6.47                         | 6.18    | -0.128               | 3.31                     | -2.31                         | 0.4648                            | 8.283  | 0.205              | 7.719   | 8.143           | 8.305  | 8.418           | 9.279                   |         |
| SLC10A7 | BcYgR.3u.VU5bXtE10 | rs1057560  | 6.53                         | 6.24    | -0.129               | 3.53                     | 1.16                          | 0.4675                            | 8.283  | 0.205              | 7.719   | 8.143           | 8.305  | 8.418           | 9.279                   |         |
| SLC10A7 | BcYgR.3u.VU5bXtE10 | rs11930848 | 3.85                         | 3.69    | 0.071                | 2.66                     | 1.29                          | 0.2375                            | 8.283  | 0.205              | 7.719   | 8.143           | 8.305  | 8.418           | 9.279                   |         |

| Symbol   | Lumi nuID          | SNP        | Population-based             | Population-based                      | % Variance Explained | Family-based                 | Distance from transcript (kb) | MAF    | Mean  | Transcript abundance (log2 scale) |         |                 |        |                 | SNP mapping under probe |         |
|----------|--------------------|------------|------------------------------|---------------------------------------|----------------------|------------------------------|-------------------------------|--------|-------|-----------------------------------|---------|-----------------|--------|-----------------|-------------------------|---------|
|          |                    |            | association p-value (-log10) | association p-value (-log10), GC adj. |                      | association p-value (-log10) |                               |        |       | Standard Deviation                | Minimum | 25th percentile | Median | 75th percentile |                         | Maximum |
| SLC11A1  | xqF579cmSU7jxXerdl | rs1059823  | 4.27                         | 4.09                                  | 0.08                 | 1.94                         | -0.19                         | 0.3693 | 8.839 | 1.028                             | 7.168   | 7.982           | 8.751  | 9.57            | 12.2                    |         |
| SLC11A1  | xqF579cmSU7jxXerdl | rs2279014  | 4.35                         | 4.16                                  | 0.081                | 2.17                         | 1.14                          | 0.335  | 8.839 | 1.028                             | 7.168   | 7.982           | 8.751  | 9.57            | 12.2                    |         |
| SLC11A1  | xqF579cmSU7jxXerdl | rs2227255  | 3.35                         | 3.21                                  | -0.061               | 2.45                         | 7.74                          | 0.385  | 8.839 | 1.028                             | 7.168   | 7.982           | 8.751  | 9.57            | 12.2                    |         |
| SLC12A7  | i6cJOLwkkAZ11O3o6o | rs4975684  | 3.63                         | 3.47                                  | 0.067                | 2.32                         | 28.14                         | 0.4525 | 7.947 | 0.263                             | 7.337   | 7.779           | 7.903  | 8.109           | 8.787                   |         |
| SLC12A7  | i6cJOLwkkAZ11O3o6o | rs4975593  | 10.71                        | 10.22                                 | 0.209                | 7.02                         | -14.83                        | 0.4697 | 7.947 | 0.263                             | 7.337   | 7.779           | 7.903  | 8.109           | 8.787                   |         |
| SLC12A7  | i6cJOLwkkAZ11O3o6o | rs6894574  | 10.58                        | 10.10                                 | 0.208                | 7.15                         | -8.61                         | 0.3025 | 7.947 | 0.263                             | 7.337   | 7.779           | 7.903  | 8.109           | 8.787                   |         |
| SLC12A7  | i6cJOLwkkAZ11O3o6o | rs4975643  | 4.1                          | 3.93                                  | 0.077                | 4.14                         | -4.32                         | 0.2775 | 7.947 | 0.263                             | 7.337   | 7.779           | 7.903  | 8.109           | 8.787                   |         |
| SLC12A7  | i6cJOLwkkAZ11O3o6o | rs4580814  | 9.82                         | 9.38                                  | -0.199               | 6.74                         | 1.14                          | 0.365  | 7.947 | 0.263                             | 7.337   | 7.779           | 7.903  | 8.109           | 8.787                   |         |
| SLC13A4  | cpAgBRyhRSIREFUhUY | rs3110817  | 3.43                         | 3.29                                  | 0.068                | 0.65                         | -1.78                         | 0.4075 | 7.262 | 0.109                             | 7.11    | 7.197           | 7.246  | 7.304           | 8.009                   |         |
| SLC13A4  | cpAgBRyhRSIREFUhUY | rs4430037  | 3.82                         | 3.66                                  | 0.076                | 1.95                         | 15.86                         | 0.4675 | 7.262 | 0.109                             | 7.11    | 7.197           | 7.246  | 7.304           | 8.009                   |         |
| SLC16A9  | 6onUL7focRRHSH3oA  | rs12354667 | 4.48                         | 4.28                                  | -0.09                | 0.76                         | -9.14                         | 0.43   | 7.121 | 0.016                             | 7.1     | 7.111           | 7.117  | 7.128           | 7.196                   |         |
| SLC16A9  | 6onUL7focRRHSH3oA  | rs1177697  | 4.73                         | 4.52                                  | 0.095                | 1.75                         | 28.19                         | 0.4725 | 7.121 | 0.016                             | 7.1     | 7.111           | 7.117  | 7.128           | 7.196                   |         |
| SLC16A9  | 6onUL7focRRHSH3oA  | rs746228   | 5.55                         | 5.31                                  | -0.113               | 1.42                         | 34.65                         | 0.4775 | 7.121 | 0.016                             | 7.1     | 7.111           | 7.117  | 7.128           | 7.196                   |         |
| SLC17A3  | rqJNCKP9iJF7T7FR4  | rs1165196  | 3.68                         | 3.52                                  | -0.07                | 0.8                          | -32.18                        | 0.43   | 7.172 | 0.053                             | 7.1     | 7.131           | 7.16   | 7.196           | 7.345                   |         |
| SLC17A3  | rqJNCKP9iJF7T7FR4  | rs9393672  | 4.46                         | 4.27                                  | -0.087               | 0.81                         | -2.72                         | 0.4625 | 7.172 | 0.053                             | 7.1     | 7.131           | 7.16   | 7.196           | 7.345                   |         |
| SLC17A3  | rqJNCKP9iJF7T7FR4  | rs942379   | 5.34                         | 5.11                                  | 0.105                | 1.45                         | 4.29                          | 0.4372 | 7.172 | 0.053                             | 7.1     | 7.131           | 7.16   | 7.196           | 7.345                   |         |
| SLC17A3  | rqJNCKP9iJF7T7FR4  | rs1165164  | 3.45                         | 3.31                                  | -0.067               | 0.4                          | 18.15                         | 0.225  | 7.172 | 0.053                             | 7.1     | 7.131           | 7.16   | 7.196           | 7.345                   |         |
| SLC17A3  | rqJNCKP9iJF7T7FR4  | rs1165206  | 4.83                         | 4.62                                  | -0.097               | 1.22                         | -14.95                        | 0.445  | 7.172 | 0.053                             | 7.1     | 7.131           | 7.16   | 7.196           | 7.345                   |         |
| SLC17A3  | rqJNCKP9iJF7T7FR4  | rs13198474 | 4.74                         | 4.53                                  | -0.094               | 0.5                          | -8.09                         | 0.085  | 7.172 | 0.053                             | 7.1     | 7.131           | 7.16   | 7.196           | 7.345                   |         |
| SLC17A3  | rqJNCKP9iJF7T7FR4  | rs670011   | 4.77                         | 4.56                                  | 0.097                | 2.31                         | 5.45                          | 0.4848 | 7.172 | 0.053                             | 7.1     | 7.131           | 7.16   | 7.196           | 7.345                   |         |
| SLC17A3  | rqJNCKP9iJF7T7FR4  | rs9467632  | 3.56                         | 3.41                                  | 0.068                | 0.8                          | 7.19                          | 0.1075 | 7.172 | 0.053                             | 7.1     | 7.131           | 7.16   | 7.196           | 7.345                   |         |
| SLC17A3  | rqJNCKP9iJF7T7FR4  | rs7748167  | 3.71                         | 3.56                                  | 0.075                | 1.32                         | 22.14                         | 0.1175 | 7.172 | 0.053                             | 7.1     | 7.131           | 7.16   | 7.196           | 7.345                   |         |
| SLC17A3  | rqJNCKP9iJF7T7FR4  | rs7749342  | 4.62                         | 4.42                                  | -0.095               | 3.38                         | 37.75                         | 0.49   | 7.172 | 0.053                             | 7.1     | 7.131           | 7.16   | 7.196           | 7.345                   |         |
| SLC17A3  | rqJNCKP9iJF7T7FR4  | rs3734523  | 4.46                         | 4.27                                  | -0.088               | 1.23                         | 43.47                         | 0.105  | 7.172 | 0.053                             | 7.1     | 7.131           | 7.16   | 7.196           | 7.345                   |         |
| SLC17A3  | rqJNCKP9iJF7T7FR4  | rs199741   | 4.73                         | 4.52                                  | 0.095                | 3.41                         | 49.06                         | 0.25   | 7.172 | 0.053                             | 7.1     | 7.131           | 7.16   | 7.196           | 7.345                   |         |
| SLC17A3  | rqJNCKP9iJF7T7FR4  | rs6940007  | 4.45                         | 4.25                                  | 0.088                | 1.23                         | 49.44                         | 0.1055 | 7.172 | 0.053                             | 7.1     | 7.131           | 7.16   | 7.196           | 7.345                   |         |
| SLC22A5  | reuQpFJXJdyR93C5Q  | rs272893   | 7.61                         | 7.27                                  | 0.159                | 5.52                         | -42.38                        | 0.3925 | 7.822 | 0.226                             | 7.304   | 7.668           | 7.813  | 7.929           | 8.895                   |         |
| SLC22A5  | reuQpFJXJdyR93C5Q  | rs272887   | 5.68                         | 5.43                                  | -0.119               | 3.66                         | -39.73                        | 0.3225 | 7.822 | 0.226                             | 7.304   | 7.668           | 7.813  | 7.929           | 8.895                   |         |
| SLC22A5  | reuQpFJXJdyR93C5Q  | rs1050152  | 13.05                        | 12.45                                 | -0.259               | 6.71                         | -29.12                        | 0.4    | 7.822 | 0.226                             | 7.304   | 7.668           | 7.813  | 7.929           | 8.895                   |         |
| SLC22A5  | reuQpFJXJdyR93C5Q  | rs273901   | 5.54                         | 5.30                                  | -0.116               | 3.78                         | -11.08                        | 0.325  | 7.822 | 0.226                             | 7.304   | 7.668           | 7.813  | 7.929           | 8.895                   |         |
| SLC22A5  | reuQpFJXJdyR93C5Q  | rs2073643  | 10.59                        | 10.10                                 | 0.215                | 5.7                          | -8.02                         | 0.4675 | 7.822 | 0.226                             | 7.304   | 7.668           | 7.813  | 7.929           | 8.895                   |         |
| SLC22A5  | reuQpFJXJdyR93C5Q  | rs11242110 | 6.55                         | 6.26                                  | -0.138               | 4.23                         | 12.47                         | 0.4525 | 7.822 | 0.226                             | 7.304   | 7.668           | 7.813  | 7.929           | 8.895                   |         |
| SLC22A5  | reuQpFJXJdyR93C5Q  | rs1016988  | 3.31                         | 3.18                                  | -0.063               | 3.75                         | 13.27                         | 0.225  | 7.822 | 0.226                             | 7.304   | 7.668           | 7.813  | 7.929           | 8.895                   |         |
| SLC22A5  | reuQpFJXJdyR93C5Q  | rs10071051 | 3.34                         | 3.20                                  | -0.062               | 1.01                         | 21.31                         | 0.2525 | 7.822 | 0.226                             | 7.304   | 7.668           | 7.813  | 7.929           | 8.895                   |         |
| SLC22A5  | reuQpFJXJdyR93C5Q  | rs886285   | 3.33                         | 3.19                                  | 0.062                | 3.65                         | 33.9                          | 0.365  | 7.822 | 0.226                             | 7.304   | 7.668           | 7.813  | 7.929           | 8.895                   |         |
| SLC22A5  | reuQpFJXJdyR93C5Q  | rs2188962  | 13.23                        | 12.62                                 | -0.261               | 6.85                         | 39.5                          | 0.39   | 7.822 | 0.226                             | 7.304   | 7.668           | 7.813  | 7.929           | 8.895                   |         |
| SLC23A3  | ldU7kK16BxKjCEq1OU | rs2293081  | 4.11                         | 3.94                                  | 0.077                | 1.23                         | -15.1                         | 0.1525 | 7.633 | 0.238                             | 7.141   | 7.479           | 7.61   | 7.769           | 9.001                   |         |
| SLC23A3  | ldU7kK16BxKjCEq1OU | rs13029742 | 3.95                         | 3.79                                  | -0.075               | 2.84                         | 0.4                           | 0.3225 | 7.633 | 0.238                             | 7.141   | 7.479           | 7.61   | 7.769           | 9.001                   |         |
| SLC23A3  | ldU7kK16BxKjCEq1OU | rs17655123 | 5.74                         | 5.49                                  | -0.111               | 1.82                         | 2.73                          | 0.145  | 7.633 | 0.238                             | 7.141   | 7.479           | 7.61   | 7.769           | 9.001                   |         |
| SLC23A3  | ldU7kK16BxKjCEq1OU | rs1127102  | 4.41                         | 4.22                                  | -0.086               | 3.58                         | 2.95                          | 0.4573 | 7.633 | 0.238                             | 7.141   | 7.479           | 7.61   | 7.769           | 9.001                   |         |
| SLC23A3  | ldU7kK16BxKjCEq1OU | rs1043160  | 4.12                         | 3.94                                  | -0.079               | 3.21                         | 3.04                          | 0.44   | 7.633 | 0.238                             | 7.141   | 7.479           | 7.61   | 7.769           | 9.001                   |         |
| SLC23A3  | ldU7kK16BxKjCEq1OU | rs3731900  | 4.44                         | 4.25                                  | 0.087                | 2.9                          | 12.26                         | 0.4425 | 7.633 | 0.238                             | 7.141   | 7.479           | 7.61   | 7.769           | 9.001                   |         |
| SLC23A3  | ldU7kK16BxKjCEq1OU | rs2385394  | 4.32                         | 4.14                                  | -0.085               | 2.87                         | 14.57                         | 0.44   | 7.633 | 0.238                             | 7.141   | 7.479           | 7.61   | 7.769           | 9.001                   |         |
| SLC23A3  | ldU7kK16BxKjCEq1OU | rs13419988 | 4.02                         | 3.85                                  | 0.078                | 2.73                         | 22.24                         | 0.4225 | 7.633 | 0.238                             | 7.141   | 7.479           | 7.61   | 7.769           | 9.001                   |         |
| SLC25A26 | 6tAruqKfuJ97i_7uk  | rs707010   | 7.48                         | 7.15                                  | 0.15                 | 3.39                         | 41.33                         | 0.3731 | 7.376 | 0.113                             | 7.153   | 7.299           | 7.359  | 7.422           | 8.017                   | Yes     |
| SLC25A26 | 6tAruqKfuJ97i_7uk  | rs782721   | 6.08                         | 5.82                                  | 0.123                | 3.91                         | 44.98                         | 0.4146 | 7.376 | 0.113                             | 7.153   | 7.299           | 7.359  | 7.422           | 8.017                   | Yes     |
| SLC25A26 | 6tAruqKfuJ97i_7uk  | rs782750   | 4.44                         | 4.25                                  | -0.089               | 1.75                         | 55.44                         | 0.3265 | 7.376 | 0.113                             | 7.153   | 7.299           | 7.359  | 7.422           | 8.017                   | Yes     |
| SLC25A26 | 6tAruqKfuJ97i_7uk  | rs782743   | 10.13                        | 9.67                                  | 0.201                | 3.49                         | 60.94                         | 0.3275 | 7.376 | 0.113                             | 7.153   | 7.299           | 7.359  | 7.422           | 8.017                   | Yes     |
| SLC25A26 | 6tAruqKfuJ97i_7uk  | rs4443106  | 4.81                         | 4.60                                  | -0.093               | 2.34                         | -59.77                        | 0.46   | 7.376 | 0.113                             | 7.153   | 7.299           | 7.359  | 7.422           | 8.017                   | Yes     |
| SLC25A26 | 6tAruqKfuJ97i_7uk  | rs9875000  | 4.83                         | 4.62                                  | 0.095                | 2.53                         | -53.7                         | 0.32   | 7.376 | 0.113                             | 7.153   | 7.299           | 7.359  | 7.422           | 8.017                   | Yes     |
| SLC25A26 | 6tAruqKfuJ97i_7uk  | rs11717286 | 3.51                         | 3.36                                  | 0.066                | 2.36                         | -51.77                        | 0.1425 | 7.376 | 0.113                             | 7.153   | 7.299           | 7.359  | 7.422           | 8.017                   | Yes     |
| SLC25A26 | 6tAruqKfuJ97i_7uk  | rs10510953 | 4.92                         | 4.70                                  | 0.096                | 2.41                         | -49.51                        | 0.3175 | 7.376 | 0.113                             | 7.153   | 7.299           | 7.359  | 7.422           | 8.017                   | Yes     |
| SLC25A26 | 6tAruqKfuJ97i_7uk  | rs332354   | 4.48                         | 4.29                                  | -0.088               | 2.47                         | -31.66                        | 0.45   | 7.376 | 0.113                             | 7.153   | 7.299           | 7.359  | 7.422           | 8.017                   | Yes     |
| SLC25A26 | 6tAruqKfuJ97i_7uk  | rs9829376  | 5.47                         | 5.23                                  | 0.11                 | 2.73                         | -18.11                        | 0.4025 | 7.376 | 0.113                             | 7.153   | 7.299           | 7.359  | 7.422           | 8.017                   | Yes     |
| SLC25A26 | 6tAruqKfuJ97i_7uk  | rs332389   | 4.5                          | 4.30                                  | -0.089               | 2.64                         | -17.29                        | 0.445  | 7.376 | 0.113                             | 7.153   | 7.299           | 7.359  | 7.422           | 8.017                   | Yes     |
| SLC25A26 | 6tAruqKfuJ97i_7uk  | rs7627907  | 5.98                         | 5.71                                  | 0.12                 | 3.05                         | -1.59                         | 0.365  | 7.376 | 0.113                             | 7.153   | 7.299           | 7.359  | 7.422           | 8.017                   | Yes     |
| SLC25A26 | 6tAruqKfuJ97i_7uk  | rs2242285  | 5.14                         | 4.92                                  | 0.102                | 2.47                         | 3.1                           | 0.3675 | 7.376 | 0.113                             | 7.153   | 7.299           | 7.359  | 7.422           | 8.017                   | Yes     |
| SLC25A26 | 6tAruqKfuJ97i_7uk  | rs332370   | 5.21                         | 4.99                                  | 0.102                | 2.14                         | 4.59                          | 0.325  | 7.376 | 0.113                             | 7.153   | 7.299           | 7.359  | 7.422           | 8.017                   | Yes     |
| SLC25A26 | 6tAruqKfuJ97i_7uk  | rs2306272  | 4.42                         | 4.23                                  | -0.087               | 2.21                         | 6.14                          | 0.3075 | 7.376 | 0.113                             | 7.153   | 7.299           | 7.359  | 7.422           | 8.017                   | Yes     |
| SLC25A26 | 6tAruqKfuJ97i_7uk  | rs12633819 | 4.95                         | 4.74                                  | 0.097                | 2.39                         | 19.8                          | 0.3575 | 7.376 | 0.113                             | 7.153   | 7.299           | 7.359  | 7.422           | 8.017                   | Yes     |
| SLC25A29 | xAOqE6UnhoQeLdaVfW | rs8021068  | 11.33                        | 10.81                                 | -0.225               | 4.59                         | -18.72                        | 0.21   | 7.509 | 0.319                             | 7.115   | 7.24            | 7.455  | 7.687           | 8.813                   |         |
| SLC25A29 | xAOqE6UnhoQeLdaVfW | rs1059264  | 31.64                        | 30.13                                 | 0.523                | 8.97                         | -3.62                         | 0.3125 | 7.509 | 0.319                             | 7.115   | 7.24            | 7.455  | 7.687           | 8.813                   |         |

| Symbol   | Lumi nuID          | SNP        | Population-based association |         | % Variance Explained | Family-based association |                               | Transcript abundance (log2 scale) |        |                    |         |                 |        |                 | SNP mapping under probe |         |
|----------|--------------------|------------|------------------------------|---------|----------------------|--------------------------|-------------------------------|-----------------------------------|--------|--------------------|---------|-----------------|--------|-----------------|-------------------------|---------|
|          |                    |            | p-value (-log10)             | GC adj. |                      | p-value (-log10)         | Distance from transcript (kb) | MAF                               | Mean   | Standard Deviation | Minimum | 25th percentile | Median | 75th percentile |                         | Maximum |
| SLC25A29 | xAOqE6UnhoQeLdaVfW | rs1059263  | 6.76                         | 6.46    | 0.135                | 2.2                      | -3.41                         | 0.3525                            | 7.509  | 0.319              | 7.115   | 7.24            | 7.455  | 7.687           | 8.813                   |         |
| SLC25A29 | xAOqE6UnhoQeLdaVfW | rs9324018  | 3.51                         | 3.36    | 0.068                | 2                        | 9.1                           | 0.37                              | 7.509  | 0.319              | 7.115   | 7.24            | 7.455  | 7.687           | 8.813                   |         |
| SLC28A1  | fY6NpEped5Hqd3I9c  | rs12900463 | 3.32                         | 3.18    | -0.064               | 1.08                     | -12.53                        | 0.26                              | 7.106  | 0.007              | 7.094   | 7.101           | 7.105  | 7.11            | 7.13                    |         |
| SLC28A1  | f0feXXVv1XUTUBJFes | rs12916177 | 3.91                         | 3.74    | -0.074               | 0.47                     | 24.91                         | 0.145                             | 7.138  | 0.032              | 7.102   | 7.121           | 7.131  | 7.144           | 7.439                   |         |
| SLC32A1  | ESJ2g3Em1JT9SQIZ9U | rs16987501 | 3.45                         | 3.30    | 0.062                | 1.36                     | -32.69                        | 0.0625                            | 7.108  | 0.009              | 7.095   | 7.103           | 7.107  | 7.112           | 7.165                   |         |
| SLC35F2  | rR6c7nUS.S1StMd1BI | rs10890773 | 3.57                         | 3.41    | -0.066               | 0.92                     | 30.35                         | 0.155                             | 8.091  | 0.241              | 7.247   | 7.939           | 8.107  | 8.262           | 8.689                   |         |
| SLC36A1  | io05SL2yNe.6r_ROjY | rs165352   | 3.36                         | 3.22    | 0.06                 | 1.52                     | -15.83                        | 0.3525                            | 8.35   | 0.324              | 7.744   | 8.148           | 8.32   | 8.506           | 9.679                   |         |
| SLC36A1  | io05SL2yNe.6r_ROjY | rs13177627 | 3.85                         | 3.69    | 0.07                 | 1.66                     | -9.57                         | 0.165                             | 8.35   | 0.324              | 7.744   | 8.148           | 8.32   | 8.506           | 9.679                   |         |
| SLC36A1  | io05SL2yNe.6r_ROjY | rs13180182 | 3.55                         | 3.40    | 0.064                | 1.3                      | 8.84                          | 0.14                              | 8.35   | 0.324              | 7.744   | 8.148           | 8.32   | 8.506           | 9.679                   |         |
| SLC38A1  | Nd63i0H9nqgBc6BceQ | rs7311868  | 6.95                         | 6.64    | 0.139                | 2.55                     | 3.93                          | 0.3275                            | 11.747 | 0.471              | 9.002   | 11.529          | 11.803 | 12.056          | 13.124                  |         |
| SLC38A1  | Nd63i0H9nqgBc6BceQ | rs1492889  | 6.72                         | 6.42    | 0.137                | 2.38                     | 19.19                         | 0.324                             | 11.747 | 0.471              | 9.002   | 11.529          | 11.803 | 12.056          | 13.124                  |         |
| SLC39A10 | fvorTwbx_xDntHu4TU | rs6733196  | 3.51                         | 3.36    | 0.071                | 0.89                     | 45.12                         | 0.395                             | 8.198  | 0.349              | 7.241   | 7.952           | 8.195  | 8.47            | 8.877                   |         |
| SLC5A11  | 9ebieZTfzeqc.58u6o | rs2112783  | 16.4                         | 15.64   | -0.297               | 3.18                     | -45.04                        | 0.2025                            | 7.261  | 0.123              | 7.108   | 7.192           | 7.233  | 7.297           | 8.083                   | Yes     |
| SLC5A11  | 9ebieZTfzeqc.58u6o | rs12923918 | 3.93                         | 3.76    | 0.072                | 0.32                     | -13.15                        | 0.4875                            | 7.261  | 0.123              | 7.108   | 7.192           | 7.233  | 7.297           | 8.083                   | Yes     |
| SLC5A11  | 9ebieZTfzeqc.58u6o | rs2343605  | 4.24                         | 4.06    | -0.08                | 1.41                     | -8.89                         | 0.395                             | 7.261  | 0.123              | 7.108   | 7.192           | 7.233  | 7.297           | 8.083                   | Yes     |
| SLC5A11  | 9ebieZTfzeqc.58u6o | rs7195553  | 9.14                         | 8.72    | -0.18                | 4                        | -4.44                         | 0.335                             | 7.261  | 0.123              | 7.108   | 7.192           | 7.233  | 7.297           | 8.083                   | Yes     |
| SLC5A11  | 9ebieZTfzeqc.58u6o | rs1862450  | 15.4                         | 14.68   | -0.283               | 3.27                     | -0.78                         | 0.205                             | 7.261  | 0.123              | 7.108   | 7.192           | 7.233  | 7.297           | 8.083                   | Yes     |
| SLC5A11  | 9ebieZTfzeqc.58u6o | rs1011078  | 3.36                         | 3.22    | 0.062                | 0.89                     | -29.27                        | 0.485                             | 7.261  | 0.123              | 7.108   | 7.192           | 7.233  | 7.297           | 8.083                   | Yes     |
| SLC5A11  | 9ebieZTfzeqc.58u6o | rs17178242 | 3.79                         | 3.63    | 0.071                | 0.51                     | -24.36                        | 0.485                             | 7.261  | 0.123              | 7.108   | 7.192           | 7.233  | 7.297           | 8.083                   | Yes     |
| SLC6A16  | oXnH3quXt16DonookM | rs8102574  | 3.49                         | 3.34    | 0.062                | 0.44                     | 0.42                          | 0.2475                            | 7.824  | 0.305              | 7.232   | 7.575           | 7.826  | 8.001           | 9.454                   |         |
| SLC6A16  | oXnH3quXt16DonookM | rs2303759  | 3.67                         | 3.52    | -0.066               | 0.2                      | 40.58                         | 0.2825                            | 7.824  | 0.305              | 7.232   | 7.575           | 7.826  | 8.001           | 9.454                   |         |
| SLC7A8   | Z_i4vuFX0iYOVpKee8 | rs927041   | 6.42                         | 6.13    | -0.13                | 1.97                     | 18.08                         | 0.22                              | 7.362  | 0.208              | 7.107   | 7.226           | 7.3    | 7.415           | 8.274                   |         |
| SLC7A8   | Z_i4vuFX0iYOVpKee8 | rs2331937  | 6.42                         | 6.13    | 0.13                 | 1.97                     | 19.34                         | 0.22                              | 7.362  | 0.208              | 7.107   | 7.226           | 7.3    | 7.415           | 8.274                   |         |
| SLC7A8   | Z_i4vuFX0iYOVpKee8 | rs2268878  | 7.83                         | 7.48    | 0.163                | 1.8                      | 25.4                          | 0.1675                            | 7.362  | 0.208              | 7.107   | 7.226           | 7.3    | 7.415           | 8.274                   |         |
| SLC7A8   | Z_i4vuFX0iYOVpKee8 | rs178758   | 3.63                         | 3.48    | 0.07                 | 0.9                      | 46.22                         | 0.1975                            | 7.362  | 0.208              | 7.107   | 7.226           | 7.3    | 7.415           | 8.274                   |         |
| SLC7A9   | QoLrVFooIV4sEJ1I34 | rs7253956  | 6.2                          | 5.93    | -0.115               | 2.63                     | 31.82                         | 0.38                              | 7.24   | 0.126              | 7.11    | 7.151           | 7.207  | 7.304           | 8.303                   |         |
| SLC7A9   | QoLrVFooIV4sEJ1I34 | rs10425973 | 4.54                         | 4.34    | 0.081                | 1.16                     | 44.42                         | 0.195                             | 7.24   | 0.126              | 7.11    | 7.151           | 7.207  | 7.304           | 8.303                   |         |
| SLC7A9   | QoLrVFooIV4sEJ1I34 | rs11668957 | 4.54                         | 4.34    | -0.081               | 1.16                     | 48.3                          | 0.195                             | 7.24   | 0.126              | 7.11    | 7.151           | 7.207  | 7.304           | 8.303                   |         |
| SLU7     | upWX307QohTkJ44igk | rs4921280  | 3.29                         | 3.15    | -0.064               | 1.57                     | 0.45                          | 0.4045                            | 9.453  | 0.168              | 8.973   | 9.341           | 9.455  | 9.572           | 9.957                   |         |
| SLU7     | upWX307QohTkJ44igk | rs2961944  | 4.79                         | 4.59    | 0.1                  | 0.6                      | 5.5                           | 0.2766                            | 9.453  | 0.168              | 8.973   | 9.341           | 9.455  | 9.572           | 9.957                   |         |
| SLU7     | upWX307QohTkJ44igk | rs2961949  | 4.98                         | 4.76    | -0.103               | 0.5                      | -5.41                         | 0.28                              | 9.453  | 0.168              | 8.973   | 9.341           | 9.455  | 9.572           | 9.957                   |         |
| SLU7     | upWX307QohTkJ44igk | rs2961911  | 4.27                         | 4.08    | -0.084               | 0.61                     | 15.48                         | 0.295                             | 9.453  | 0.168              | 8.973   | 9.341           | 9.455  | 9.572           | 9.957                   |         |
| SMAD5    | cTMSMOFCcunkey54   | rs7728385  | 5.9                          | 5.64    | 0.116                | 1.59                     | -49.49                        | 0.1125                            | 8.812  | 0.471              | 7.562   | 8.452           | 8.822  | 9.13            | 9.927                   |         |
| SMAD5    | cTMSMOFCcunkey54   | rs7726644  | 5.9                          | 5.64    | 0.116                | 1.59                     | -37.22                        | 0.1125                            | 8.812  | 0.471              | 7.562   | 8.452           | 8.822  | 9.13            | 9.927                   |         |
| SMAD5    | cTMSMOFCcunkey54   | rs17748071 | 4.3                          | 4.12    | 0.087                | 1.42                     | -27.22                        | 0.2375                            | 8.812  | 0.471              | 7.562   | 8.452           | 8.822  | 9.13            | 9.927                   |         |
| SMAD5    | cTMSMOFCcunkey54   | rs3764941  | 13.8                         | 13.16   | -0.261               | 3.94                     | 0.99                          | 0.3125                            | 8.812  | 0.471              | 7.562   | 8.452           | 8.822  | 9.13            | 9.927                   |         |
| SMAD5    | cTMSMOFCcunkey54   | rs9327744  | 9.64                         | 9.20    | -0.188               | 1.89                     | 5.23                          | 0.21                              | 8.812  | 0.471              | 7.562   | 8.452           | 8.822  | 9.13            | 9.927                   |         |
| SMAD5    | cTMSMOFCcunkey54   | rs6596287  | 13.32                        | 12.71   | 0.254                | 3.9                      | 10.81                         | 0.3                               | 8.812  | 0.471              | 7.562   | 8.452           | 8.822  | 9.13            | 9.927                   |         |
| SMARCE1  | H0gTUBdCnSjVMhSJUU | rs608517   | 3.59                         | 3.44    | -0.069               | 2.09                     | -47.74                        | 0.3625                            | 10.511 | 0.312              | 9.64    | 10.265          | 10.506 | 10.723          | 11.383                  |         |
| SMARCE1  | H0gTUBdCnSjVMhSJUU | rs1358175  | 4.01                         | 3.84    | -0.078               | 3.72                     | -26.18                        | 0.407                             | 10.511 | 0.312              | 9.64    | 10.265          | 10.506 | 10.723          | 11.383                  |         |
| SMARCE1  | H0gTUBdCnSjVMhSJUU | rs757411   | 5.3                          | 5.07    | -0.105               | 3.05                     | -8.82                         | 0.42                              | 10.511 | 0.312              | 9.64    | 10.265          | 10.506 | 10.723          | 11.383                  |         |
| SMARCE1  | H0gTUBdCnSjVMhSJUU | rs11659024 | 6.3                          | 6.02    | 0.127                | 2.78                     | -8.17                         | 0.4823                            | 10.511 | 0.312              | 9.64    | 10.265          | 10.506 | 10.723          | 11.383                  |         |
| SMARCE1  | H0gTUBdCnSjVMhSJUU | rs1474454  | 4.35                         | 4.16    | 0.085                | 1.67                     | 7.51                          | 0.4475                            | 10.511 | 0.312              | 9.64    | 10.265          | 10.506 | 10.723          | 11.383                  |         |
| SMARCE1  | H0gTUBdCnSjVMhSJUU | rs2014704  | 3.54                         | 3.39    | 0.068                | 2.45                     | 4.15                          | 0.3367                            | 10.511 | 0.312              | 9.64    | 10.265          | 10.506 | 10.723          | 11.383                  |         |
| SMARCE1  | H0gTUBdCnSjVMhSJUU | rs7223332  | 3.35                         | 3.21    | 0.065                | 1.95                     | 20.53                         | 0.335                             | 10.511 | 0.312              | 9.64    | 10.265          | 10.506 | 10.723          | 11.383                  |         |
| SMARCE1  | H0gTUBdCnSjVMhSJUU | rs2462957  | 4.23                         | 4.05    | 0.082                | 1.83                     | 37.86                         | 0.4375                            | 10.511 | 0.312              | 9.64    | 10.265          | 10.506 | 10.723          | 11.383                  |         |
| SMC2L1   | Nkl_jf3TFQBPOsOebE | rs2122576  | 4.2                          | 4.02    | 0.08                 | 2.55                     | 13.58                         | 0.4475                            | 7.594  | 0.151              | 7.174   | 7.497           | 7.601  | 7.685           | 8.209                   |         |
| SMC2L1   | Nkl_jf3TFQBPOsOebE | rs10117106 | 5.54                         | 5.30    | -0.107               | 3.37                     | -19.01                        | 0.1275                            | 7.594  | 0.151              | 7.174   | 7.497           | 7.601  | 7.685           | 8.209                   |         |
| SMC2L1   | Nkl_jf3TFQBPOsOebE | rs10991126 | 5.6                          | 5.36    | 0.109                | 3.42                     | 16.32                         | 0.1263                            | 7.594  | 0.151              | 7.174   | 7.497           | 7.601  | 7.685           | 8.209                   |         |
| SMC2L1   | Nkl_jf3TFQBPOsOebE | rs6479223  | 4.48                         | 4.28    | -0.086               | 2.19                     | 19.09                         | 0.4475                            | 7.594  | 0.151              | 7.174   | 7.497           | 7.601  | 7.685           | 8.209                   |         |
| SMC2L1   | Nkl_jf3TFQBPOsOebE | rs2122575  | 5.77                         | 5.52    | -0.111               | 3.42                     | 30.6                          | 0.125                             | 7.594  | 0.151              | 7.174   | 7.497           | 7.601  | 7.685           | 8.209                   |         |
| SMC2L1   | Nkl_jf3TFQBPOsOebE | rs1580013  | 5.77                         | 5.52    | 0.111                | 3.42                     | 31.68                         | 0.125                             | 7.594  | 0.151              | 7.174   | 7.497           | 7.601  | 7.685           | 8.209                   |         |
| SMC2L1   | Nkl_jf3TFQBPOsOebE | rs1450674  | 4.08                         | 3.90    | -0.078               | 2.08                     | 46.74                         | 0.4472                            | 7.594  | 0.151              | 7.174   | 7.497           | 7.601  | 7.685           | 8.209                   |         |
| SMC6L1   | Bvud.TEgagEw10rNUK | rs2001674  | 5.87                         | 5.61    | 0.12                 | 2.28                     | -48.92                        | 0.2714                            | 8.066  | 0.398              | 7.151   | 7.787           | 8.068  | 8.354           | 9.014                   | Yes     |
| SMC6L1   | Bvud.TEgagEw10rNUK | rs2710684  | 7.16                         | 6.84    | -0.143               | 3.27                     | -81.05                        | 0.201                             | 8.066  | 0.398              | 7.151   | 7.787           | 8.068  | 8.354           | 9.014                   | Yes     |
| SMC6L1   | Bvud.TEgagEw10rNUK | rs4578856  | 10.83                        | 10.34   | -0.215               | 3.77                     | 8.31                          | 0.155                             | 8.066  | 0.398              | 7.151   | 7.787           | 8.068  | 8.354           | 9.014                   | Yes     |
| SMC6L1   | Bvud.TEgagEw10rNUK | rs17381041 | 3.9                          | 3.73    | 0.075                | 1.51                     | -33.05                        | 0.345                             | 8.066  | 0.398              | 7.151   | 7.787           | 8.068  | 8.354           | 9.014                   | Yes     |
| SMC6L1   | Bvud.TEgagEw10rNUK | rs7556886  | 10.3                         | 9.83    | -0.205               | 3.75                     | -26.93                        | 0.1625                            | 8.066  | 0.398              | 7.151   | 7.787           | 8.068  | 8.354           | 9.014                   | Yes     |
| SMC6L1   | Bvud.TEgagEw10rNUK | rs1812706  | 8.31                         | 7.93    | -0.164               | 2.62                     | 38.04                         | 0.2675                            | 8.066  | 0.398              | 7.151   | 7.787           | 8.068  | 8.354           | 9.014                   | Yes     |
| SMU1     | TrAlgrqh.v57Id3Vbo | rs4879656  | 3.77                         | 3.61    | 0.075                | 1.76                     | -34.79                        | 0.38                              | 8.835  | 0.263              | 7.897   | 8.677           | 8.881  | 9.013           | 9.643                   |         |
| SMU1     | TrAlgrqh.v57Id3Vbo | rs10971361 | 3.77                         | 3.61    | 0.075                | 1.76                     | -4.61                         | 0.38                              | 8.835  | 0.263              | 7.897   | 8.677           | 8.881  | 9.013           | 9.643                   |         |
| SNAI2    | QXkQE4oN6ee7JEeLhk | rs6987879  | 3.56                         | 3.41    | 0.066                | 0.76                     | -22.17                        | 0.2975                            | 7.119  | 0.013              | 7.094   | 7.11            | 7.115  | 7.124           | 7.175                   |         |



| Symbol | Lumi nuID          | SNP        | Population-based | Population-based          | % Variance | Distance from   | MAF    | Mean      | Transcript abundance (log2 scale) |            |            |            |         | SNP mapping under probe |        |     |
|--------|--------------------|------------|------------------|---------------------------|------------|-----------------|--------|-----------|-----------------------------------|------------|------------|------------|---------|-------------------------|--------|-----|
|        |                    |            | association      | association               |            |                 |        |           | Standard                          | 25th       | Median     | 75th       | Maximum |                         |        |     |
|        |                    |            | p-value (-log10) | p-value (-log10), GC adj. | Explained  | transcript (kb) |        | Deviation | Minimum                           | percentile | percentile | percentile | Maximum |                         |        |     |
| SNAI2  | QXkQE4oN6ee7JELhK  | rs870397   | 4.01             | 3.84                      | -0.075     | 0.75            | 27.24  | 0.35      | 7.119                             | 0.013      | 7.094      | 7.11       | 7.115   | 7.124                   | 7.175  |     |
| SNAI3  | 6ojqkoeoiVGPJ_ru8  | rs3794624  | 3.31             | 3.17                      | 0.063      | 1.84            | -17.5  | 0.3475    | 9.423                             | 0.457      | 8.328      | 9.129      | 9.408   | 9.784                   | 10.893 | Yes |
| SNAI3  | 6ojqkoeoiVGPJ_ru8  | rs11076696 | 16.58            | 15.80                     | -0.319     | 7.48            | 5.41   | 0.335     | 9.423                             | 0.457      | 8.328      | 9.129      | 9.408   | 9.784                   | 10.893 | Yes |
| SNAI3  | 6ojqkoeoiVGPJ_ru8  | rs8060693  | 16.49            | 15.72                     | -0.32      | 4.62            | 4.96   | 0.3675    | 9.423                             | 0.457      | 8.328      | 9.129      | 9.408   | 9.784                   | 10.893 | Yes |
| SNAI3  | 6ojqkoeoiVGPJ_ru8  | rs7186861  | 13.99            | 13.34                     | -0.272     | 5.29            | 8.4    | 0.2725    | 9.423                             | 0.457      | 8.328      | 9.129      | 9.408   | 9.784                   | 10.893 | Yes |
| SNAI3  | 6ojqkoeoiVGPJ_ru8  | rs11648894 | 10.57            | 10.09                     | -0.219     | 4.46            | 13.48  | 0.3325    | 9.423                             | 0.457      | 8.328      | 9.129      | 9.408   | 9.784                   | 10.893 | Yes |
| SNAI3  | 6ojqkoeoiVGPJ_ru8  | rs881633   | 3.9              | 3.74                      | 0.076      | 1.8             | 20.86  | 0.1025    | 9.423                             | 0.457      | 8.328      | 9.129      | 9.408   | 9.784                   | 10.893 | Yes |
| SNAI3  | 6ojqkoeoiVGPJ_ru8  | rs8059048  | 3.98             | 3.81                      | 0.077      | 0.8             | 28.16  | 0.155     | 9.423                             | 0.457      | 8.328      | 9.129      | 9.408   | 9.784                   | 10.893 | Yes |
| SNAI3  | 6ojqkoeoiVGPJ_ru8  | rs2242171  | 4.45             | 4.26                      | 0.092      | 1.39            | 41.03  | 0.4053    | 9.423                             | 0.457      | 8.328      | 9.129      | 9.408   | 9.784                   | 10.893 | Yes |
| SNAP29 | EKefAJOBWo5lkn.uRo | rs178070   | 3.86             | 3.69                      | 0.074      | 2.77            | 5.05   | 0.3518    | 8.532                             | 0.231      | 7.905      | 8.398      | 8.565   | 8.707                   | 9.078  |     |
| SNAP29 | EKefAJOBWo5lkn.uRo | rs10483104 | 19.72            | 18.79                     | -0.364     | 4.5             | 7.44   | 0.075     | 8.532                             | 0.231      | 7.905      | 8.398      | 8.565   | 8.707                   | 9.078  |     |
| SNAP29 | EKefAJOBWo5lkn.uRo | rs12162703 | 19.72            | 18.79                     | -0.364     | 4.5             | 2.79   | 0.075     | 8.532                             | 0.231      | 7.905      | 8.398      | 8.565   | 8.707                   | 9.078  |     |
| SNX11  | BdXXenNcV7e6nf8cUk | rs11651097 | 4.76             | 4.59                      | 0.091      | 2.77            | -37.88 | 0.1825    | 9.318                             | 0.26       | 8.749      | 9.154      | 9.283   | 9.438                   | 10.84  |     |
| SNX11  | 9JSXo0.vpLEz6eC0v8 | rs11651097 | 3.38             | 3.24                      | 0.062      | 0.95            | -37.88 | 0.1825    | 7.122                             | 0.02       | 7.092      | 7.109      | 7.117   | 7.131                   | 7.224  |     |
| SNX11  | BdXXenNcV7e6nf8cUk | rs2240122  | 4.98             | 4.76                      | 0.096      | 2.87            | -32.36 | 0.185     | 9.318                             | 0.26       | 8.749      | 9.154      | 9.283   | 9.438                   | 10.84  |     |
| SNX11  | 9JSXo0.vpLEz6eC0v8 | rs2240122  | 3.5              | 3.35                      | 0.064      | 0.97            | -32.36 | 0.185     | 7.122                             | 0.02       | 7.092      | 7.109      | 7.117   | 7.131                   | 7.224  |     |
| SNX16  | cy75e3vcCYFJR.9Dek | rs10112819 | 4.22             | 4.04                      | 0.083      | 0.47            | -20.11 | 0.294     | 8.313                             | 0.333      | 7.131      | 8.112      | 8.331   | 8.521                   | 9.027  |     |
| SNX16  | cy75e3vcCYFJR.9Dek | rs1565313  | 4.93             | 4.71                      | -0.096     | 1.44            | -19.82 | 0.085     | 8.313                             | 0.333      | 7.131      | 8.112      | 8.331   | 8.521                   | 9.027  |     |
| SNX16  | cy75e3vcCYFJR.9Dek | rs5017296  | 3.84             | 3.67                      | -0.075     | 0.48            | -19.63 | 0.2944    | 8.313                             | 0.333      | 7.131      | 8.112      | 8.331   | 8.521                   | 9.027  |     |
| SNX16  | cy75e3vcCYFJR.9Dek | rs993011   | 5.99             | 5.73                      | 0.118      | 1.03            | -10.57 | 0.18      | 8.313                             | 0.333      | 7.131      | 8.112      | 8.331   | 8.521                   | 9.027  |     |
| SNX16  | cy75e3vcCYFJR.9Dek | rs1489587  | 8.02             | 7.66                      | -0.157     | 1.27            | 4.03   | 0.26      | 8.313                             | 0.333      | 7.131      | 8.112      | 8.331   | 8.521                   | 9.027  |     |
| SNX16  | cy75e3vcCYFJR.9Dek | rs774468   | 8.02             | 7.66                      | -0.157     | 1.27            | 11.29  | 0.26      | 8.313                             | 0.333      | 7.131      | 8.112      | 8.331   | 8.521                   | 9.027  |     |
| SNX16  | cy75e3vcCYFJR.9Dek | rs774469   | 5.15             | 4.92                      | 0.104      | 0.34            | 12.05  | 0.36      | 8.313                             | 0.333      | 7.131      | 8.112      | 8.331   | 8.521                   | 9.027  |     |
| SNX16  | cy75e3vcCYFJR.9Dek | rs774471   | 5.99             | 5.72                      | -0.118     | 1.07            | 12.61  | 0.1784    | 8.313                             | 0.333      | 7.131      | 8.112      | 8.331   | 8.521                   | 9.027  |     |
| SNX16  | cy75e3vcCYFJR.9Dek | rs16909651 | 5.71             | 5.45                      | 0.113      | 1.07            | 15.75  | 0.1734    | 8.313                             | 0.333      | 7.131      | 8.112      | 8.331   | 8.521                   | 9.027  |     |
| SNX16  | cy75e3vcCYFJR.9Dek | rs774464   | 6.06             | 5.79                      | 0.119      | 1.07            | -19.02 | 0.1775    | 8.313                             | 0.333      | 7.131      | 8.112      | 8.331   | 8.521                   | 9.027  |     |
| SNX16  | cy75e3vcCYFJR.9Dek | rs1470787  | 7.88             | 7.52                      | -0.155     | 1.22            | -12.18 | 0.2613    | 8.313                             | 0.333      | 7.131      | 8.112      | 8.331   | 8.521                   | 9.027  |     |
| SNX16  | cy75e3vcCYFJR.9Dek | rs12542216 | 6.06             | 5.79                      | -0.119     | 1.07            | 1.34   | 0.1775    | 8.313                             | 0.333      | 7.131      | 8.112      | 8.331   | 8.521                   | 9.027  |     |
| SNX16  | cy75e3vcCYFJR.9Dek | rs13261227 | 3.3              | 3.16                      | -0.063     | 0.28            | 4.41   | 0.24      | 8.313                             | 0.333      | 7.131      | 8.112      | 8.331   | 8.521                   | 9.027  |     |
| SNX16  | cy75e3vcCYFJR.9Dek | rs1451994  | 5.01             | 4.79                      | -0.102     | 0.33            | 24.38  | 0.3525    | 8.313                             | 0.333      | 7.131      | 8.112      | 8.331   | 8.521                   | 9.027  |     |
| SNX16  | cy75e3vcCYFJR.9Dek | rs1376841  | 5.47             | 5.23                      | 0.111      | 0.41            | 32.61  | 0.3525    | 8.313                             | 0.333      | 7.131      | 8.112      | 8.331   | 8.521                   | 9.027  |     |
| SNX16  | cy75e3vcCYFJR.9Dek | rs1817107  | 5.19             | 4.96                      | 0.106      | 0.34            | 36.93  | 0.3475    | 8.313                             | 0.333      | 7.131      | 8.112      | 8.331   | 8.521                   | 9.027  |     |
| SNX16  | cy75e3vcCYFJR.9Dek | rs10111831 | 4.75             | 4.54                      | -0.097     | 0.34            | 39.17  | 0.3442    | 8.313                             | 0.333      | 7.131      | 8.112      | 8.331   | 8.521                   | 9.027  |     |
| SNX16  | cy75e3vcCYFJR.9Dek | rs10481273 | 3.82             | 3.66                      | -0.075     | 0.48            | 43.59  | 0.425     | 8.313                             | 0.333      | 7.131      | 8.112      | 8.331   | 8.521                   | 9.027  |     |
| SNX16  | cy75e3vcCYFJR.9Dek | rs1452001  | 4.84             | 4.62                      | 0.098      | 0.22            | 48.14  | 0.34      | 8.313                             | 0.333      | 7.131      | 8.112      | 8.331   | 8.521                   | 9.027  |     |
| SNX16  | cy75e3vcCYFJR.9Dek | rs1452002  | 3.53             | 3.38                      | -0.069     | 0.48            | 48.92  | 0.4175    | 8.313                             | 0.333      | 7.131      | 8.112      | 8.331   | 8.521                   | 9.027  |     |
| SNX19  | xnhKuMApKgg_pe541I | rs7943757  | 5.54             | 5.29                      | -0.109     | 0.56            | -29.62 | 0.43      | 9.959                             | 0.274      | 8.786      | 9.812      | 9.982   | 10.133                  | 10.594 |     |
| SNX19  | xnhKuMApKgg_pe541I | rs10791098 | 6.48             | 6.19                      | 0.127      | 1.32            | -27.06 | 0.495     | 9.959                             | 0.274      | 8.786      | 9.812      | 9.982   | 10.133                  | 10.594 |     |
| SNX19  | xnhKuMApKgg_pe541I | rs12279359 | 4.88             | 4.67                      | 0.095      | 0.97            | -15.23 | 0.425     | 9.959                             | 0.274      | 8.786      | 9.812      | 9.982   | 10.133                  | 10.594 |     |
| SNX19  | xnhKuMApKgg_pe541I | rs11222362 | 5.26             | 5.03                      | 0.103      | 0.91            | -14.35 | 0.43      | 9.959                             | 0.274      | 8.786      | 9.812      | 9.982   | 10.133                  | 10.594 |     |
| SNX19  | xnhKuMApKgg_pe541I | rs7119425  | 3.88             | 3.71                      | -0.074     | 0.73            | -12.59 | 0.4325    | 9.959                             | 0.274      | 8.786      | 9.812      | 9.982   | 10.133                  | 10.594 |     |
| SNX19  | xnhKuMApKgg_pe541I | rs3234     | 5.22             | 4.99                      | 0.106      | 1.55            | -9.5   | 0.0925    | 9.959                             | 0.274      | 8.786      | 9.812      | 9.982   | 10.133                  | 10.594 |     |
| SNX19  | xnhKuMApKgg_pe541I | rs2236711  | 5.44             | 5.20                      | 0.107      | 1.11            | -6.49  | 0.4525    | 9.959                             | 0.274      | 8.786      | 9.812      | 9.982   | 10.133                  | 10.594 |     |
| SNX19  | xnhKuMApKgg_pe541I | rs12365680 | 5.4              | 5.16                      | 0.106      | 1.02            | 3.28   | 0.4025    | 9.959                             | 0.274      | 8.786      | 9.812      | 9.982   | 10.133                  | 10.594 |     |
| SNX19  | xnhKuMApKgg_pe541I | rs2298566  | 3.62             | 3.47                      | -0.07      | 1.04            | 4.87   | 0.245     | 9.959                             | 0.274      | 8.786      | 9.812      | 9.982   | 10.133                  | 10.594 |     |
| SNX19  | xnhKuMApKgg_pe541I | rs876641   | 5.86             | 5.60                      | -0.116     | 1.13            | 6.26   | 0.455     | 9.959                             | 0.274      | 8.786      | 9.812      | 9.982   | 10.133                  | 10.594 |     |
| SNX19  | xnhKuMApKgg_pe541I | rs948085   | 3.62             | 3.47                      | -0.07      | 1.01            | 6.79   | 0.245     | 9.959                             | 0.274      | 8.786      | 9.812      | 9.982   | 10.133                  | 10.594 |     |
| SNX19  | xnhKuMApKgg_pe541I | rs11222391 | 3.33             | 3.19                      | 0.063      | 0.97            | 5.69   | 0.3367    | 9.959                             | 0.274      | 8.786      | 9.812      | 9.982   | 10.133                  | 10.594 |     |
| SNX25  | 6qC_kUWFENJAIQLSg  | rs6850094  | 4.72             | 4.59                      | -0.094     | 0.45            | -45.24 | 0.4575    | 7.608                             | 0.247      | 7.115      | 7.409      | 7.598   | 7.769                   | 8.295  |     |
| SNX25  | 6qC_kUWFENJAIQLSg  | rs2310159  | 6.04             | 5.77                      | 0.124      | 1.3             | 2.92   | 0.45      | 7.608                             | 0.247      | 7.115      | 7.409      | 7.598   | 7.769                   | 8.295  |     |
| SNX25  | 6qC_kUWFENJAIQLSg  | rs7675903  | 6.1              | 5.83                      | -0.126     | 0.74            | 28.16  | 0.4875    | 7.608                             | 0.247      | 7.115      | 7.409      | 7.598   | 7.769                   | 8.295  |     |
| SNX25  | 6qC_kUWFENJAIQLSg  | rs7698980  | 8.84             | 8.44                      | 0.184      | 1.55            | 43.91  | 0.4548    | 7.608                             | 0.247      | 7.115      | 7.409      | 7.598   | 7.769                   | 8.295  |     |
| SNX25  | 6qC_kUWFENJAIQLSg  | rs3108227  | 5.02             | 4.80                      | -0.101     | 0.42            | 46.99  | 0.445     | 7.608                             | 0.247      | 7.115      | 7.409      | 7.598   | 7.769                   | 8.295  |     |
| SNX25  | 6qC_kUWFENJAIQLSg  | rs2280664  | 9.89             | 9.43                      | -0.206     | 1.59            | 54.27  | 0.4325    | 7.608                             | 0.247      | 7.115      | 7.409      | 7.598   | 7.769                   | 8.295  |     |
| SNX25  | 6qC_kUWFENJAIQLSg  | rs2310160  | 10.42            | 9.94                      | 0.217      | 1.78            | 59.01  | 0.435     | 7.608                             | 0.247      | 7.115      | 7.409      | 7.598   | 7.769                   | 8.295  |     |
| SNX25  | 6qC_kUWFENJAIQLSg  | rs2692596  | 7.71             | 7.37                      | -0.165     | 1.12            | 72.81  | 0.42      | 7.608                             | 0.247      | 7.115      | 7.409      | 7.598   | 7.769                   | 8.295  |     |
| SNX25  | 6qC_kUWFENJAIQLSg  | rs1288536  | 5.29             | 5.05                      | 0.106      | 0.73            | -75.14 | 0.48      | 7.608                             | 0.247      | 7.115      | 7.409      | 7.598   | 7.769                   | 8.295  |     |
| SNX25  | 6qC_kUWFENJAIQLSg  | rs1288542  | 6.39             | 6.11                      | -0.13      | 0.88            | -73.14 | 0.4825    | 7.608                             | 0.247      | 7.115      | 7.409      | 7.598   | 7.769                   | 8.295  |     |
| SNX25  | 6qC_kUWFENJAIQLSg  | rs2692593  | 5.74             | 5.49                      | 0.117      | 1.16            | -64.74 | 0.43      | 7.608                             | 0.247      | 7.115      | 7.409      | 7.598   | 7.769                   | 8.295  |     |
| SNX25  | 6qC_kUWFENJAIQLSg  | rs1288569  | 6.88             | 6.58                      | -0.141     | 1.12            | -54.84 | 0.4625    | 7.608                             | 0.247      | 7.115      | 7.409      | 7.598   | 7.769                   | 8.295  |     |
| SNX25  | 6qC_kUWFENJAIQLSg  | rs3806823  | 8.79             | 8.40                      | 0.184      | 1.08            | -52.98 | 0.405     | 7.608                             | 0.247      | 7.115      | 7.409      | 7.598   | 7.769                   | 8.295  |     |
| SOD2   | uoEEpfPUeeqPju6iRK | rs2758352  | 3.84             | 3.67                      | -0.07      | 0.09            | 8.57   | 0.2075    | 9.671                             | 0.486      | 8.693      | 9.328      | 9.62    | 9.956                   | 11.726 |     |

| Symbol   | Lumi nuID           | SNP        | Population-based association |                  | % Variance Explained | Family-based association |                               | Transcript abundance (log2 scale) |        |                    |         |                 |        |                 | SNP mapping under probe |         |
|----------|---------------------|------------|------------------------------|------------------|----------------------|--------------------------|-------------------------------|-----------------------------------|--------|--------------------|---------|-----------------|--------|-----------------|-------------------------|---------|
|          |                     |            | p-value (-log10)             | p-value (-log10) |                      | p-value (-log10)         | Distance from transcript (kb) | MAF                               | Mean   | Standard Deviation | Minimum | 25th percentile | Median | 75th percentile |                         | Maximum |
| SORBS1   | ciOfwRApCVQHxzf_S0  | rs11188295 | 3.53                         | 3.39             | -0.064               | 0.05                     | 54.34                         | 0.0575                            | 7.135  | 0.029              | 7.094   | 7.116           | 7.128  | 7.147           | 7.306                   |         |
| SORBS1   | ciOfwRApCVQHxzf_S0  | rs3818540  | 3.55                         | 3.40             | -0.07                | 0.45                     | 94.28                         | 0.07                              | 7.135  | 0.029              | 7.094   | 7.116           | 7.128  | 7.147           | 7.306                   |         |
| SOX18    | T.1KCVIVKF76SL5Srw  | rs2427590  | 13.17                        | 12.56            | -0.265               | 4.48                     | -37.02                        | 0.1725                            | 7.222  | 0.121              | 7.102   | 7.151           | 7.191  | 7.227           | 7.872                   |         |
| SOX18    | T.1KCVIVKF76SL5Srw  | rs816922   | 15.75                        | 15.01            | 0.303                | 3.02                     | -28.12                        | 0.065                             | 7.222  | 0.121              | 7.102   | 7.151           | 7.191  | 7.227           | 7.872                   |         |
| SOX18    | T.1KCVIVKF76SL5Srw  | rs816931   | 15.75                        | 15.01            | 0.303                | 3.07                     | -20.23                        | 0.065                             | 7.222  | 0.121              | 7.102   | 7.151           | 7.191  | 7.227           | 7.872                   |         |
| SP110    | rfgpce01ECdf.xqTVM  | rs13025520 | 3.9                          | 3.74             | -0.077               | 0.56                     | 4.38                          | 0.11                              | 8.509  | 0.331              | 7.739   | 8.334           | 8.498  | 8.688           | 9.405                   |         |
| SP110    | rfgpce01ECdf.xqTVM  | rs1004868  | 3.9                          | 3.74             | -0.077               | 0.56                     | 5.3                           | 0.11                              | 8.509  | 0.331              | 7.739   | 8.334           | 8.498  | 8.688           | 9.405                   |         |
| SP110    | rfgpce01ECdf.xqTVM  | rs1004869  | 3.9                          | 3.74             | -0.077               | 0.58                     | 5.62                          | 0.11                              | 8.509  | 0.331              | 7.739   | 8.334           | 8.498  | 8.688           | 9.405                   |         |
| SP110    | rfgpce01ECdf.xqTVM  | rs957682   | 3.75                         | 3.59             | 0.073                | 1.75                     | 9.62                          | 0.4025                            | 8.509  | 0.331              | 7.739   | 8.334           | 8.498  | 8.688           | 9.405                   |         |
| SP110    | rfgpce01ECdf.xqTVM  | rs3948464  | 3.32                         | 3.18             | -0.063               | 0.27                     | 17.06                         | 0.115                             | 8.509  | 0.331              | 7.739   | 8.334           | 8.498  | 8.688           | 9.405                   |         |
| SPACA1   | 6vmOj5RLuCuGOS7qjKE | rs10455478 | 3.66                         | 3.51             | 0.07                 | 0.21                     | -9.81                         | 0.2286                            | 7.173  | 0.04               | 7.113   | 7.145           | 7.166  | 7.189           | 7.35                    |         |
| SPACA1   | 6vmOj5RLuCuGOS7qjKE | rs10944341 | 3.29                         | 3.15             | -0.062               | 0.43                     | 10.08                         | 0.2425                            | 7.173  | 0.04               | 7.113   | 7.145           | 7.166  | 7.189           | 7.35                    |         |
| SPAG16   | WV3vqpz4w6oKe5O7ql  | rs10185045 | 3.55                         | 3.40             | -0.071               | 1.9                      | -31.81                        | 0.285                             | 8.453  | 0.286              | 7.693   | 8.273           | 8.451  | 8.619           | 9.352                   | Yes     |
| SPAG8    | cQihlp64orAkpUuA6E  | rs10758320 | 4.56                         | 4.37             | -0.09                | 1.24                     | -43.42                        | 0.3479                            | 7.375  | 0.17               | 7.106   | 7.241           | 7.365  | 7.478           | 8.305                   |         |
| SPAG8    | cQihlp64orAkpUuA6E  | rs4878628  | 7.41                         | 7.08             | 0.143                | 2.44                     | -41.22                        | 0.295                             | 7.375  | 0.17               | 7.106   | 7.241           | 7.365  | 7.478           | 8.305                   |         |
| SPAG8    | cQihlp64orAkpUuA6E  | rs2281645  | 8.52                         | 8.13             | 0.165                | 3.55                     | 1.55                          | 0.32                              | 7.375  | 0.17               | 7.106   | 7.241           | 7.365  | 7.478           | 8.305                   |         |
| SPAG8    | cQihlp64orAkpUuA6E  | rs10738948 | 6.59                         | 6.30             | 0.13                 | 2.68                     | 21.19                         | 0.3945                            | 7.375  | 0.17               | 7.106   | 7.241           | 7.365  | 7.478           | 8.305                   |         |
| SPAG8    | cQihlp64orAkpUuA6E  | rs17204908 | 8.43                         | 8.05             | 0.164                | 3.81                     | 42.31                         | 0.3317                            | 7.375  | 0.17               | 7.106   | 7.241           | 7.365  | 7.478           | 8.305                   |         |
| SPAM1    | izXwX.4TTop.qDeOCU  | rs17551316 | 3.78                         | 3.62             | 0.072                | 0                        | -12.93                        | 0.0625                            | 7.123  | 0.024              | 7.093   | 7.109           | 7.117  | 7.129           | 7.337                   |         |
| SPATA20  | 3dpTHR5VX6kVHRXIMA  | rs3785915  | 5.21                         | 4.98             | -0.099               | 1.88                     | -10.72                        | 0.3125                            | 8.854  | 0.533              | 7.549   | 8.481           | 8.807  | 9.248           | 10.335                  |         |
| SPATA20  | 3dpTHR5VX6kVHRXIMA  | rs1122634  | 13.6                         | 12.97            | 0.267                | 3.52                     | -3.2                          | 0.5                               | 8.854  | 0.533              | 7.549   | 8.481           | 8.807  | 9.248           | 10.335                  |         |
| SPATA20  | 3dpTHR5VX6kVHRXIMA  | rs8065903  | 4.84                         | 4.63             | -0.09                | 1.93                     | -3.75                         | 0.2875                            | 8.854  | 0.533              | 7.549   | 8.481           | 8.807  | 9.248           | 10.335                  |         |
| SPATA20  | 3dpTHR5VX6kVHRXIMA  | rs739924   | 12.11                        | 11.56            | 0.225                | 5.12                     | -1.61                         | 0.23                              | 8.854  | 0.533              | 7.549   | 8.481           | 8.807  | 9.248           | 10.335                  |         |
| SPATA20  | 3dpTHR5VX6kVHRXIMA  | rs989128   | 22.16                        | 21.11            | 0.394                | 5.18                     | 3.32                          | 0.2889                            | 8.854  | 0.533              | 7.549   | 8.481           | 8.807  | 9.248           | 10.335                  |         |
| SPATA5L1 | cU5QypeO3XyAF2SSAU  | rs4774580  | 4.99                         | 4.78             | -0.098               | 2.04                     | -42.5                         | 0.255                             | 8.689  | 0.185              | 8.062   | 8.584           | 8.683  | 8.808           | 9.136                   |         |
| SPATA5L1 | cU5QypeO3XyAF2SSAU  | rs1346268  | 4.99                         | 4.78             | -0.098               | 2.04                     | -21.56                        | 0.255                             | 8.689  | 0.185              | 8.062   | 8.584           | 8.683  | 8.808           | 9.136                   |         |
| SPATA5L1 | cU5QypeO3XyAF2SSAU  | rs9806699  | 4.24                         | 4.05             | -0.085               | 1.33                     | 26.78                         | 0.2861                            | 8.689  | 0.185              | 8.062   | 8.584           | 8.683  | 8.808           | 9.136                   |         |
| SPCS3    | H5OvXxLz33LiT54     | rs1454162  | 3.56                         | 3.40             | -0.064               | 1.12                     | -1.85                         | 0.175                             | 7.988  | 0.302              | 7.289   | 7.753           | 7.959  | 8.186           | 8.797                   |         |
| SPG7     | o1fQbLTveugk1YaVc   | rs4238830  | 6.33                         | 6.05             | 0.125                | 2.24                     | -34.56                        | 0.49                              | 7.893  | 0.28               | 7.33    | 7.679           | 7.88   | 8.061           | 8.996                   |         |
| SPG7     | HmL_6PN4IIISBn11J_k | rs4238830  | 3.45                         | 3.31             | 0.068                | 0.37                     | -34.56                        | 0.49                              | 7.415  | 0.183              | 7.103   | 7.283           | 7.409  | 7.506           | 8.2                     |         |
| SPG7     | o1fQbLTveugk1YaVc   | rs3803681  | 6.33                         | 6.05             | 0.125                | 2.17                     | -30.05                        | 0.49                              | 7.893  | 0.28               | 7.33    | 7.679           | 7.88   | 8.061           | 8.996                   |         |
| SPG7     | HmL_6PN4IIISBn11J_k | rs3803681  | 3.45                         | 3.31             | 0.068                | 0.41                     | -30.05                        | 0.49                              | 7.415  | 0.183              | 7.103   | 7.283           | 7.409  | 7.506           | 8.2                     |         |
| SPG7     | o1fQbLTveugk1YaVc   | rs4347628  | 6.83                         | 6.52             | -0.131               | 2.44                     | -4.17                         | 0.4375                            | 7.893  | 0.28               | 7.33    | 7.679           | 7.88   | 8.061           | 8.996                   |         |
| SPG7     | HmL_6PN4IIISBn11J_k | rs4347628  | 4.45                         | 4.25             | -0.088               | 0.79                     | -4.17                         | 0.4375                            | 7.415  | 0.183              | 7.103   | 7.283           | 7.409  | 7.506           | 8.2                     |         |
| SPG7     | o1fQbLTveugk1YaVc   | rs463701   | 8.38                         | 8.00             | 0.164                | 2.93                     | -5.37                         | 0.46                              | 7.893  | 0.28               | 7.33    | 7.679           | 7.88   | 8.061           | 8.996                   |         |
| SPG7     | HmL_6PN4IIISBn11J_k | rs463701   | 3.6                          | 3.45             | 0.07                 | 0.24                     | -5.37                         | 0.46                              | 7.415  | 0.183              | 7.103   | 7.283           | 7.409  | 7.506           | 8.2                     |         |
| SPG7     | o1fQbLTveugk1YaVc   | rs382745   | 8.91                         | 8.50             | 0.175                | 3.17                     | -0.54                         | 0.4548                            | 7.893  | 0.28               | 7.33    | 7.679           | 7.88   | 8.061           | 8.996                   |         |
| SPG7     | HmL_6PN4IIISBn11J_k | rs382745   | 4.01                         | 3.84             | 0.08                 | 0.38                     | -0.54                         | 0.4548                            | 7.415  | 0.183              | 7.103   | 7.283           | 7.409  | 7.506           | 8.2                     |         |
| SPINK2   | rnXpLRfZjd3jV0P63s  | rs2037046  | 4.79                         | 4.58             | 0.088                | 4.1                      | -1.65                         | 0.415                             | 7.597  | 0.233              | 7.141   | 7.44            | 7.561  | 7.743           | 8.209                   |         |
| SPIRE1   | fcP9ebuwC2Kz56T0q4  | rs7235783  | 6.18                         | 5.91             | 0.129                | 1.81                     | 43.99                         | 0.1357                            | 7.604  | 0.19               | 7.197   | 7.471           | 7.583  | 7.71            | 8.299                   |         |
| SPIRE1   | fcP9ebuwC2Kz56T0q4  | rs479860   | 4.18                         | 4.00             | 0.082                | 1.9                      | -21.02                        | 0.16                              | 7.604  | 0.19               | 7.197   | 7.471           | 7.583  | 7.71            | 8.299                   |         |
| SPIRE1   | fcP9ebuwC2Kz56T0q4  | rs16939680 | 3.48                         | 3.34             | -0.067               | 1.65                     | 49.17                         | 0.145                             | 7.604  | 0.19               | 7.197   | 7.471           | 7.583  | 7.71            | 8.299                   |         |
| SPIRE2   | rE7teXdelcUT3mtdE   | rs12709094 | 5.74                         | 5.49             | 0.114                | 2.96                     | -41.89                        | 0.4045                            | 7.137  | 0.028              | 7.104   | 7.121           | 7.13   | 7.144           | 7.317                   |         |
| SPIRE2   | rE7teXdelcUT3mtdE   | rs11646374 | 3.89                         | 3.72             | -0.078               | 2.53                     | -36.97                        | 0.0925                            | 7.137  | 0.028              | 7.104   | 7.121           | 7.13   | 7.144           | 7.317                   |         |
| SPIRE2   | rE7teXdelcUT3mtdE   | rs7190823  | 5.48                         | 5.24             | -0.11                | 3.23                     | -28.86                        | 0.405                             | 7.137  | 0.028              | 7.104   | 7.121           | 7.13   | 7.144           | 7.317                   |         |
| SPIRE2   | rE7teXdelcUT3mtdE   | rs2270460  | 4.13                         | 3.95             | -0.083               | 2.21                     | 34.69                         | 0.0969                            | 7.137  | 0.028              | 7.104   | 7.121           | 7.13   | 7.144           | 7.317                   |         |
| SPNS1    | fXdRkPjVCp2uc.sGgw  | rs8045689  | 3.69                         | 3.54             | -0.069               | 3.12                     | 2.12                          | 0.34                              | 10.166 | 0.282              | 9.354   | 9.994           | 10.134 | 10.337          | 11.075                  |         |
| SPON1    | QqoQIFcu3Tv7P61S_o  | rs4471396  | 3.69                         | 3.69             | 0.069                | 0.28                     | -49.31                        | 0.23                              | 7.882  | 0.275              | 7.186   | 7.701           | 7.873  | 8.03            | 8.644                   |         |
| SPON1    | QqoQIFcu3Tv7P61S_o  | rs1507526  | 4.95                         | 4.73             | -0.097               | 1.03                     | -43.7                         | 0.3375                            | 7.882  | 0.275              | 7.186   | 7.701           | 7.873  | 8.03            | 8.644                   |         |
| SPON1    | QqoQIFcu3Tv7P61S_o  | rs2271155  | 3.69                         | 3.54             | -0.069               | 0.28                     | -41.01                        | 0.23                              | 7.882  | 0.275              | 7.186   | 7.701           | 7.873  | 8.03            | 8.644                   |         |
| SPON1    | QqoQIFcu3Tv7P61S_o  | rs2271154  | 4.21                         | 4.03             | 0.08                 | 0.47                     | -40.98                        | 0.225                             | 7.882  | 0.275              | 7.186   | 7.701           | 7.873  | 8.03            | 8.644                   |         |
| SPON1    | QqoQIFcu3Tv7P61S_o  | rs1027837  | 6.7                          | 6.40             | 0.133                | 0.99                     | -37.37                        | 0.405                             | 7.882  | 0.275              | 7.186   | 7.701           | 7.873  | 8.03            | 8.644                   |         |
| SPON1    | QqoQIFcu3Tv7P61S_o  | rs7932860  | 4.26                         | 4.08             | -0.083               | 0.63                     | -33.27                        | 0.3925                            | 7.882  | 0.275              | 7.186   | 7.701           | 7.873  | 8.03            | 8.644                   |         |
| SPRED2   | 03tSCXVYVVCc.nRPBA  | rs7601514  | 3.64                         | 3.49             | 0.07                 | 0.21                     | 7.72                          | 0.255                             | 7.183  | 0.051              | 7.118   | 7.15            | 7.171  | 7.204           | 7.433                   |         |
| SPRED2   | 03tSCXVYVVCc.nRPBA  | rs6743585  | 3.6                          | 3.44             | 0.067                | 0.29                     | 17.73                         | 0.1633                            | 7.183  | 0.051              | 7.118   | 7.15            | 7.171  | 7.204           | 7.433                   |         |
| SPRYD4   | HXeXV.ISI.dlez1Neo  | rs1082214  | 3.92                         | 3.75             | 0.074                | 0.58                     | -15.87                        | 0.0525                            | 7.575  | 0.172              | 7.267   | 7.47            | 7.553  | 7.652           | 8.779                   |         |
| SPRYD4   | HXeXV.ISI.dlez1Neo  | rs7302925  | 14.43                        | 13.76            | -0.272               | 2.7                      | -0.9                          | 0.1825                            | 7.575  | 0.172              | 7.267   | 7.47            | 7.553  | 7.652           | 8.779                   |         |
| SPSB2    | 6_VXIOCXedxS4le4w   | rs5446     | 3.81                         | 3.98             | 0.08                 | 1.2                      | -23.64                        | 0.3125                            | 8.417  | 0.322              | 7.724   | 8.183           | 8.391  | 8.62            | 9.53                    |         |
| SPSB2    | 6_VXIOCXedxS4le4w   | rs2238114  | 4.13                         | 3.95             | -0.084               | 1.28                     | -14.36                        | 0.3141                            | 8.417  | 0.322              | 7.724   | 8.183           | 8.391  | 8.62            | 9.53                    |         |
| SPSB2    | 6_VXIOCXedxS4le4w   | rs2040352  | 4.4                          | 4.25             | -0.091               | 1.48                     | 24.55                         | 0.28                              | 8.417  | 0.322              | 7.724   | 8.183           | 8.391  | 8.62            | 9.53                    |         |
| SPSB2    | 6_VXIOCXedxS4le4w   | rs2301137  | 4.25                         | 4.07             | 0.087                | 0.93                     | 36.5                          | 0.275                             | 8.417  | 0.322              | 7.724   | 8.183           | 8.391  | 8.62            | 9.53                    |         |
| SPSB2    | 6_VXIOCXedxS4le4w   | rs710415   | 5.65                         | 5.40             | 0.117                | 1.26                     | 40.67                         | 0.285                             | 8.417  | 0.322              | 7.724   | 8.183           | 8.391  | 8.62            | 9.53                    |         |

| Symbol   | Lumi nuID          | SNP        | Population-based             | Population-based                      | % Variance Explained | Family-based                 | Distance from transcript (kb) | MAF    | Mean  | Transcript abundance (log2 scale) |         |                 |        |                 | SNP mapping under probe |         |
|----------|--------------------|------------|------------------------------|---------------------------------------|----------------------|------------------------------|-------------------------------|--------|-------|-----------------------------------|---------|-----------------|--------|-----------------|-------------------------|---------|
|          |                    |            | association p-value (-log10) | association p-value (-log10), GC adj. |                      | association p-value (-log10) |                               |        |       | Standard Deviation                | Minimum | 25th percentile | Median | 75th percentile |                         | Maximum |
| SPTBN5   | rPI6XVXk9e3q4Iohu8 | rs1209334  | 3.71                         | 3.55                                  | -0.07                | 1.25                         | 3.79                          | 0.425  | 7.178 | 0.078                             | 7.104   | 7.128           | 7.156  | 7.199           | 7.577                   |         |
| SPTLC1   | igo0_P1_7OjDWOEpQc | rs10123181 | 3.52                         | 3.37                                  | 0.07                 | 2.29                         | -49.02                        | 0.0829 | 7.428 | 0.112                             | 7.133   | 7.358           | 7.421  | 7.508           | 7.778                   |         |
| SPTLC1   | igo0_P1_7OjDWOEpQc | rs10820938 | 3.38                         | 3.24                                  | 0.066                | 1.97                         | 0.63                          | 0.05   | 7.428 | 0.112                             | 7.133   | 7.358           | 7.421  | 7.508           | 7.778                   |         |
| SQSTM1   | E5epfp6l3r3hH956Cc | rs565280   | 25.15                        | 23.96                                 | 0.449                | 7.27                         | 6.03                          | 0.4925 | 8.301 | 0.329                             | 7.541   | 8.108           | 8.289  | 8.513           | 9.275                   |         |
| SQSTM1   | E5epfp6l3r3hH956Cc | rs10277    | 26.14                        | 24.90                                 | -0.457               | 7.57                         | -0.35                         | 0.49   | 8.301 | 0.329                             | 7.541   | 8.108           | 8.289  | 8.513           | 9.275                   |         |
| SQSTM1   | E5epfp6l3r3hH956Cc | rs1065154  | 25.84                        | 24.61                                 | 0.462                | 7.11                         | -0.16                         | 0.4949 | 8.301 | 0.329                             | 7.541   | 8.108           | 8.289  | 8.513           | 9.275                   |         |
| SQSTM1   | E5epfp6l3r3hH956Cc | rs248247   | 12.94                        | 12.34                                 | -0.26                | 2.86                         | 2.7                           | 0.3325 | 8.301 | 0.329                             | 7.541   | 8.108           | 8.289  | 8.513           | 9.275                   |         |
| SQSTM1   | E5epfp6l3r3hH956Cc | rs248248   | 7.29                         | 6.97                                  | -0.152               | 3.11                         | 2.87                          | 0.3333 | 8.301 | 0.329                             | 7.541   | 8.108           | 8.289  | 8.513           | 9.275                   |         |
| SQSTM1   | E5epfp6l3r3hH956Cc | rs2303677  | 6.62                         | 6.32                                  | 0.133                | 0.88                         | 3.7                           | 0.1683 | 8.301 | 0.329                             | 7.541   | 8.108           | 8.289  | 8.513           | 9.275                   |         |
| SQSTM1   | E5epfp6l3r3hH956Cc | rs748197   | 17.53                        | 16.71                                 | -0.329               | 4.71                         | 8.74                          | 0.4075 | 8.301 | 0.329                             | 7.541   | 8.108           | 8.289  | 8.513           | 9.275                   |         |
| SQSTM1   | E5epfp6l3r3hH956Cc | rs1650893  | 26.14                        | 24.90                                 | -0.457               | 7.57                         | 15.3                          | 0.49   | 8.301 | 0.329                             | 7.541   | 8.108           | 8.289  | 8.513           | 9.275                   |         |
| SQSTM1   | E5epfp6l3r3hH956Cc | rs10060182 | 7.99                         | 7.63                                  | -0.157               | 2.3                          | 20.67                         | 0.265  | 8.301 | 0.329                             | 7.541   | 8.108           | 8.289  | 8.513           | 9.275                   |         |
| SQSTM1   | E5epfp6l3r3hH956Cc | rs13936    | 3.29                         | 3.15                                  | -0.061               | 0.67                         | 24.58                         | 0.075  | 8.301 | 0.329                             | 7.541   | 8.108           | 8.289  | 8.513           | 9.275                   |         |
| SQSTM1   | E5epfp6l3r3hH956Cc | rs30386    | 5.32                         | 5.08                                  | -0.106               | 1.28                         | 25.77                         | 0.4275 | 8.301 | 0.329                             | 7.541   | 8.108           | 8.289  | 8.513           | 9.275                   |         |
| SQSTM1   | E5epfp6l3r3hH956Cc | rs248217   | 11.06                        | 10.55                                 | 0.225                | 2.9                          | 45.25                         | 0.3725 | 8.301 | 0.329                             | 7.541   | 8.108           | 8.289  | 8.513           | 9.275                   |         |
| SRBD1    | 6H3H5QTeX56H7Oo_3U | rs17393522 | 3.31                         | 3.17                                  | -0.062               | 0.97                         | -8.54                         | 0.4975 | 9.249 | 0.237                             | 8.146   | 9.116           | 9.263  | 9.401           | 10.316                  |         |
| SRBD1    | 6H3H5QTeX56H7Oo_3U | rs17322265 | 3.78                         | 3.62                                  | 0.072                | 0.67                         | 104.17                        | 0.441  | 9.249 | 0.237                             | 8.146   | 9.116           | 9.263  | 9.401           | 10.316                  |         |
| SRBD1    | 6H3H5QTeX56H7Oo_3U | rs1477246  | 4.86                         | 4.64                                  | -0.093               | 1.62                         | -96.97                        | 0.46   | 9.249 | 0.237                             | 8.146   | 9.116           | 9.263  | 9.401           | 10.316                  |         |
| SRBD1    | 6H3H5QTeX56H7Oo_3U | rs7558188  | 3.35                         | 3.21                                  | -0.063               | 0.89                         | -63.38                        | 0.4425 | 9.249 | 0.237                             | 8.146   | 9.116           | 9.263  | 9.401           | 10.316                  |         |
| SRBD1    | 6H3H5QTeX56H7Oo_3U | rs3821063  | 3.3                          | 3.16                                  | -0.062               | 0.96                         | -53.99                        | 0.4425 | 9.249 | 0.237                             | 8.146   | 9.116           | 9.263  | 9.401           | 10.316                  |         |
| SRI      | 0pxR6i0o04vTffX3x4 | rs7810426  | 11.43                        | 10.90                                 | -0.226               | 5.86                         | -7.47                         | 0.2875 | 8.301 | 0.344                             | 7.647   | 8.035           | 8.278  | 8.528           | 9.314                   |         |
| SRI      | 0pxR6i0o04vTffX3x4 | rs1063964  | 41.7                         | 39.70                                 | -0.622               | 8.26                         | 1.04                          | 0.2965 | 8.301 | 0.344                             | 7.647   | 8.035           | 8.278  | 8.528           | 9.314                   |         |
| SRI      | 0pxR6i0o04vTffX3x4 | rs734909   | 13.07                        | 12.47                                 | -0.253               | 4.81                         | 1.68                          | 0.1475 | 8.301 | 0.344                             | 7.647   | 8.035           | 8.278  | 8.528           | 9.314                   |         |
| SRI      | 0pxR6i0o04vTffX3x4 | rs7804513  | 6.81                         | 6.51                                  | -0.136               | 2.07                         | 24.19                         | 0.1692 | 8.301 | 0.344                             | 7.647   | 8.035           | 8.278  | 8.528           | 9.314                   |         |
| SRI      | 0pxR6i0o04vTffX3x4 | rs43123    | 8.84                         | 8.44                                  | -0.177               | 3.36                         | 26.7                          | 0.2275 | 8.301 | 0.344                             | 7.647   | 8.035           | 8.278  | 8.528           | 9.314                   |         |
| SRR      | NFTkIi6.tNXicIQ3ik | rs216205   | 3.3                          | 3.16                                  | -0.066               | 2.07                         | -11.1                         | 0.2613 | 7.505 | 0.155                             | 7.148   | 7.391           | 7.498  | 7.616           | 7.983                   |         |
| SRR      | NFTkIi6.tNXicIQ3ik | rs1885987  | 13.32                        | 12.70                                 | 0.267                | 3.53                         | -4.22                         | 0.4025 | 7.505 | 0.155                             | 7.148   | 7.391           | 7.498  | 7.616           | 7.983                   |         |
| SRR      | NFTkIi6.tNXicIQ3ik | rs216195   | 3.79                         | 3.63                                  | -0.072               | 0.56                         | -4.08                         | 0.2764 | 7.505 | 0.155                             | 7.148   | 7.391           | 7.498  | 7.616           | 7.983                   |         |
| SRR      | NFTkIi6.tNXicIQ3ik | rs12451892 | 4.41                         | 4.22                                  | 0.087                | 1.01                         | 19.43                         | 0.3825 | 7.505 | 0.155                             | 7.148   | 7.391           | 7.498  | 7.616           | 7.983                   |         |
| SRXN1    | 3pKX73R5XcKgrR2kc  | rs6085283  | 8.54                         | 8.16                                  | -0.165               | 2.2                          | -0.93                         | 0.425  | 8.049 | 0.375                             | 7.118   | 7.803           | 8.042  | 8.284           | 9.605                   |         |
| ST3GAL5  | reEHuCUV6nEgFEt9Uk | rs9789575  | 4.87                         | 4.66                                  | 0.098                | 2.73                         | -41.02                        | 0.125  | 9.477 | 0.225                             | 8.607   | 9.327           | 9.487  | 9.636           | 10.094                  | Yes     |
| ST3GAL5  | reEHuCUV6nEgFEt9Uk | rs6753123  | 3.36                         | 3.22                                  | -0.065               | 1.89                         | -18.77                        | 0.145  | 9.477 | 0.225                             | 8.607   | 9.327           | 9.487  | 9.636           | 10.094                  | Yes     |
| ST3GAL5  | reEHuCUV6nEgFEt9Uk | rs1518987  | 6.29                         | 6.02                                  | -0.125               | 4.6                          | -15.04                        | 0.485  | 9.477 | 0.225                             | 8.607   | 9.327           | 9.487  | 9.636           | 10.094                  | Yes     |
| ST3GAL5  | reEHuCUV6nEgFEt9Uk | rs13020072 | 8.57                         | 8.18                                  | -0.172               | 3.7                          | 8.24                          | 0.3442 | 9.477 | 0.225                             | 8.607   | 9.327           | 9.487  | 9.636           | 10.094                  | Yes     |
| ST3GAL5  | reEHuCUV6nEgFEt9Uk | rs1518990  | 8.57                         | 8.18                                  | 0.172                | 3.7                          | 13.07                         | 0.3442 | 9.477 | 0.225                             | 8.607   | 9.327           | 9.487  | 9.636           | 10.094                  | Yes     |
| ST3GAL5  | reEHuCUV6nEgFEt9Uk | rs3731824  | 12.09                        | 11.53                                 | 0.242                | 4.84                         | 22.04                         | 0.2323 | 9.477 | 0.225                             | 8.607   | 9.327           | 9.487  | 9.636           | 10.094                  | Yes     |
| ST3GAL5  | reEHuCUV6nEgFEt9Uk | rs3810821  | 12.38                        | 11.81                                 | 0.245                | 5.07                         | -19.3                         | 0.23   | 9.477 | 0.225                             | 8.607   | 9.327           | 9.487  | 9.636           | 10.094                  | Yes     |
| ST3GAL5  | reEHuCUV6nEgFEt9Uk | rs2030275  | 8.71                         | 8.32                                  | -0.174               | 3.89                         | -14.24                        | 0.3425 | 9.477 | 0.225                             | 8.607   | 9.327           | 9.487  | 9.636           | 10.094                  | Yes     |
| ST3GAL5  | reEHuCUV6nEgFEt9Uk | rs12622987 | 12.42                        | 11.85                                 | 0.245                | 4.93                         | -9.59                         | 0.2275 | 9.477 | 0.225                             | 8.607   | 9.327           | 9.487  | 9.636           | 10.094                  | Yes     |
| 6GALNAC1 | EquOrpQxRD154AEd9Q | rs4633757  | 6.44                         | 6.15                                  | 0.118                | 2.42                         | -26.29                        | 0.38   | 8.251 | 0.377                             | 7.122   | 7.976           | 8.245  | 8.515           | 9.032                   |         |
| 6GALNAC1 | EquOrpQxRD154AEd9Q | rs2532443  | 7.43                         | 7.10                                  | -0.138               | 3.15                         | -23.88                        | 0.435  | 8.251 | 0.377                             | 7.122   | 7.976           | 8.245  | 8.515           | 9.032                   |         |
| 6GALNAC1 | EquOrpQxRD154AEd9Q | rs6501911  | 9.91                         | 9.46                                  | 0.184                | 4.48                         | -0.94                         | 0.4725 | 8.251 | 0.377                             | 7.122   | 7.976           | 8.245  | 8.515           | 9.032                   |         |
| 6GALNAC1 | EquOrpQxRD154AEd9Q | rs717571   | 8.83                         | 8.43                                  | -0.163               | 3.52                         | -0.02                         | 0.4875 | 8.251 | 0.377                             | 7.122   | 7.976           | 8.245  | 8.515           | 9.032                   |         |
| 6GALNAC1 | EquOrpQxRD154AEd9Q | rs12450896 | 5.74                         | 5.49                                  | -0.106               | 1.89                         | 9.02                          | 0.3775 | 8.251 | 0.377                             | 7.122   | 7.976           | 8.245  | 8.515           | 9.032                   |         |
| 6GALNAC1 | EquOrpQxRD154AEd9Q | rs719430   | 8.69                         | 8.29                                  | -0.164               | 3.03                         | -0.2                          | 0.4873 | 8.251 | 0.377                             | 7.122   | 7.976           | 8.245  | 8.515           | 9.032                   |         |
| 6GALNAC1 | EquOrpQxRD154AEd9Q | rs7214860  | 13.88                        | 13.23                                 | 0.25                 | 4.28                         | 2.68                          | 0.4275 | 8.251 | 0.377                             | 7.122   | 7.976           | 8.245  | 8.515           | 9.032                   |         |
| 6GALNAC1 | EquOrpQxRD154AEd9Q | rs2286587  | 7.31                         | 6.98                                  | 0.136                | 2.04                         | 44.67                         | 0.37   | 8.251 | 0.377                             | 7.122   | 7.976           | 8.245  | 8.515           | 9.032                   |         |
| 6GALNAC1 | EquOrpQxRD154AEd9Q | rs2286586  | 7.04                         | 6.73                                  | 0.131                | 2                            | 44.72                         | 0.365  | 8.251 | 0.377                             | 7.122   | 7.976           | 8.245  | 8.515           | 9.032                   |         |
| 6GALNAC1 | EquOrpQxRD154AEd9Q | rs8067445  | 11.62                        | 11.09                                 | 0.219                | 2.72                         | 48.04                         | 0.4225 | 8.251 | 0.377                             | 7.122   | 7.976           | 8.245  | 8.515           | 9.032                   |         |
| 6GALNAC1 | EquOrpQxRD154AEd9Q | rs7225592  | 7.04                         | 6.73                                  | 0.131                | 1.92                         | 49.03                         | 0.365  | 8.251 | 0.377                             | 7.122   | 7.976           | 8.245  | 8.515           | 9.032                   |         |
| 6GALNAC2 | 6SBHqKt6R_OqvL5_kk | rs2304921  | 4.05                         | 3.88                                  | 0.08                 | 1.53                         | -7.1                          | 0.075  | 7.304 | 0.149                             | 7.118   | 7.213           | 7.263  | 7.35            | 8.166                   |         |
| 6GALNAC4 | Wf7V6p46VUHRSTThfs | rs10819317 | 5.26                         | 5.03                                  | -0.103               | 2.79                         | -1.21                         | 0.196  | 8.507 | 0.292                             | 7.912   | 8.3             | 8.481  | 8.683           | 10.32                   |         |
| 6GALNAC5 | oJKeAc6E4.eCJE3UeE | rs12744696 | 3.37                         | 3.22                                  | -0.068               | 0.27                         | 21.8                          | 0.105  | 7.115 | 0.024                             | 7.093   | 7.105           | 7.111  | 7.119           | 7.389                   |         |
| 6GALNAC5 | oJKeAc6E4.eCJE3UeE | rs7524360  | 3.37                         | 3.22                                  | -0.068               | 0.24                         | 36.37                         | 0.105  | 7.115 | 0.024                             | 7.093   | 7.105           | 7.111  | 7.119           | 7.389                   |         |
| 6GALNAC6 | ujp7aiezRer3tV6d7M | rs10819317 | 11.72                        | 11.18                                 | -0.227               | 5.6                          | 7.09                          | 0.196  | 9.037 | 0.454                             | 7.77    | 8.741           | 9.011  | 9.277           | 10.362                  |         |
| ST7L     | QREIBTd43l7nBUngQ4 | rs7544663  | 13.11                        | 12.50                                 | 0.254                | 3.74                         | 4.59                          | 0.4975 | 7.308 | 0.109                             | 7.129   | 7.229           | 7.291  | 7.377           | 7.791                   |         |
| ST7L     | 3XUgRPeAarjLgkPlzk | rs7544663  | 7.02                         | 6.71                                  | 0.141                | 1.8                          | 4.59                          | 0.4975 | 7.295 | 0.136                             | 7.103   | 7.198           | 7.266  | 7.357           | 7.774                   |         |
| ST7L     | QREIBTd43l7nBUngQ4 | rs7415820  | 12.14                        | 11.58                                 | 0.238                | 4.85                         | 7.41                          | 0.4975 | 7.308 | 0.109                             | 7.129   | 7.229           | 7.291  | 7.377           | 7.791                   |         |
| ST7L     | 3XUgRPeAarjLgkPlzk | rs7415820  | 6.69                         | 6.39                                  | 0.135                | 1.32                         | 7.41                          | 0.4975 | 7.295 | 0.136                             | 7.103   | 7.198           | 7.266  | 7.357           | 7.774                   |         |
| ST7L     | QREIBTd43l7nBUngQ4 | rs12046208 | 9.99                         | 9.53                                  | -0.198               | 4.19                         | 9.55                          | 0.445  | 7.308 | 0.109                             | 7.129   | 7.229           | 7.291  | 7.377           | 7.791                   |         |
| ST7L     | 3XUgRPeAarjLgkPlzk | rs12046208 | 5.79                         | 5.54                                  | -0.116               | 1.4                          | 9.55                          | 0.445  | 7.295 | 0.136                             | 7.103   | 7.198           | 7.266  | 7.357           | 7.774                   |         |
| ST7L     | QREIBTd43l7nBUngQ4 | rs17030613 | 6.17                         | 5.89                                  | 0.124                | 2.28                         | 28.77                         | 0.21   | 7.308 | 0.109                             | 7.129   | 7.229           | 7.291  | 7.377           | 7.791                   |         |

| Symbol | Lumi nuID          | SNP        | Population-based             | Population-based                      | % Variance Explained | Family-based                 | Distance from transcript (kb) | MAF    | Mean   | Transcript abundance (log2 scale) |         |                 |        |                 | SNP mapping under probe |
|--------|--------------------|------------|------------------------------|---------------------------------------|----------------------|------------------------------|-------------------------------|--------|--------|-----------------------------------|---------|-----------------|--------|-----------------|-------------------------|
|        |                    |            | association p-value (-log10) | association p-value (-log10), GC adj. |                      | association p-value (-log10) |                               |        |        | Standard Deviation                | Minimum | 25th percentile | Median | 75th percentile |                         |
| ST7L   | 3XUgRPeAarJLgkPlzk | rs17030613 | 3.53                         | 3.38                                  | 0.069                | 1.83                         | 28.77                         | 0.21   | 7.295  | 0.136                             | 7.103   | 7.198           | 7.266  | 7.357           | 7.774                   |
| ST7L   | 3XUgRPeAarJLgkPlzk | rs12025785 | 3.39                         | 3.25                                  | 0.064                | 0.97                         | 43.33                         | 0.0528 | 7.295  | 0.136                             | 7.103   | 7.198           | 7.266  | 7.357           | 7.774                   |
| STAM   | I3sl3kxx6e00RSbEsk | rs4237347  | 3.42                         | 3.27                                  | -0.068               | 0.44                         | -31.54                        | 0.3775 | 9.106  | 0.285                             | 7.127   | 8.963           | 9.127  | 9.278           | 9.816                   |
| STAM   | I3sl3kxx6e00RSbEsk | rs1937348  | 6.25                         | 5.97                                  | 0.126                | 1.9                          | 4.56                          | 0.4472 | 9.106  | 0.285                             | 7.127   | 8.963           | 9.127  | 9.278           | 9.816                   |
| STAM   | I3sl3kxx6e00RSbEsk | rs6602207  | 6.18                         | 5.91                                  | 0.124                | 1.72                         | 12.75                         | 0.445  | 9.106  | 0.285                             | 7.127   | 8.963           | 9.127  | 9.278           | 9.816                   |
| STAM   | I3sl3kxx6e00RSbEsk | rs2570287  | 5.76                         | 5.50                                  | 0.115                | 1.7                          | -31.84                        | 0.445  | 9.106  | 0.285                             | 7.127   | 8.963           | 9.127  | 9.278           | 9.816                   |
| STAM   | I3sl3kxx6e00RSbEsk | rs4556434  | 6.24                         | 5.97                                  | 0.125                | 1.81                         | -12.78                        | 0.4425 | 9.106  | 0.285                             | 7.127   | 8.963           | 9.127  | 9.278           | 9.816                   |
| STAT6  | leXnk3.e_VTUWUn1fQ | rs324021   | 5.2                          | 4.97                                  | -0.1                 | 1.7                          | -43.35                        | 0.4475 | 10.319 | 0.378                             | 9.456   | 10.029          | 10.333 | 10.572          | 11.186                  |
| STAT6  | leXnk3.e_VTUWUn1fQ | rs703817   | 8.5                          | 8.12                                  | -0.164               | 2.73                         | 0.64                          | 0.495  | 10.319 | 0.378                             | 9.456   | 10.029          | 10.333 | 10.572          | 11.186                  |
| STAT6  | leXnk3.e_VTUWUn1fQ | rs324015   | 7.8                          | 7.45                                  | 0.151                | 1.76                         | 0.91                          | 0.2175 | 10.319 | 0.378                             | 9.456   | 10.029          | 10.333 | 10.572          | 11.186                  |
| STAT6  | leXnk3.e_VTUWUn1fQ | rs841718   | 7.79                         | 7.43                                  | 0.15                 | 2.48                         | 3.81                          | 0.4045 | 10.319 | 0.378                             | 9.456   | 10.029          | 10.333 | 10.572          | 11.186                  |
| STAT6  | leXnk3.e_VTUWUn1fQ | rs167769   | 5.29                         | 5.06                                  | -0.105               | 1.31                         | -1.39                         | 0.401  | 10.319 | 0.378                             | 9.456   | 10.029          | 10.333 | 10.572          | 11.186                  |
| STAT6  | leXnk3.e_VTUWUn1fQ | rs4759044  | 3.9                          | 3.73                                  | 0.073                | 1.89                         | 25.51                         | 0.4347 | 10.319 | 0.378                             | 9.456   | 10.029          | 10.333 | 10.572          | 11.186                  |
| STATH  | li78DE_ldyrJE03fgk | rs17641990 | 5.47                         | 5.23                                  | -0.116               | 0.5                          | 2.25                          | 0.105  | 7.131  | 0.034                             | 7.099   | 7.112           | 7.122  | 7.138           | 7.453                   |
| STK17B | ohQSSlzl.dPfxJLqE  | rs12621714 | 3.63                         | 3.48                                  | 0.07                 | 2.83                         | -9.05                         | 0.3643 | 10.02  | 0.453                             | 7.213   | 9.755           | 10.003 | 10.315          | 11.137                  |
| STK39  | ZQorqdUo6xT539cnBU | rs950535   | 3.55                         | 3.40                                  | -0.067               | 2.49                         | -8.25                         | 0.415  | 10.165 | 0.272                             | 9.161   | 10.018          | 10.178 | 10.345          | 10.878                  |
| STK39  | ZQorqdUo6xT539cnBU | rs1400637  | 3.55                         | 3.40                                  | 0.067                | 2.74                         | 32.38                         | 0.2613 | 10.165 | 0.272                             | 9.161   | 10.018          | 10.178 | 10.345          | 10.878                  |
| STK39  | ZQorqdUo6xT539cnBU | rs9917256  | 3.86                         | 3.70                                  | 0.074                | 2.03                         | 38.93                         | 0.135  | 10.165 | 0.272                             | 9.161   | 10.018          | 10.178 | 10.345          | 10.878                  |
| STMN3  | BJXHip6jPXTrpJnTJg | rs879471   | 3.6                          | 3.45                                  | 0.066                | 2.48                         | -1.12                         | 0.455  | 13.19  | 0.476                             | 11.374  | 12.933          | 13.222 | 13.428          | 14.492                  |
| STON1  | ThXeOpM7SnUd8KLS4U | rs17397852 | 3.48                         | 3.33                                  | -0.065               | 2.24                         | -3.93                         | 0.1025 | 7.166  | 0.05                              | 7.102   | 7.133           | 7.15   | 7.191           | 7.4                     |
| STON1  | ThXeOpM7SnUd8KLS4U | rs7604334  | 3.9                          | 3.74                                  | -0.075               | 2.41                         | 6.39                          | 0.3317 | 7.166  | 0.05                              | 7.102   | 7.133           | 7.15   | 7.191           | 7.4                     |
| STOX1  | Ek6SiMugyPdRoRlt6g | rs1782345  | 22.01                        | 20.97                                 | -0.401               | 7.42                         | -20.17                        | 0.2775 | 7.286  | 0.191                             | 7.119   | 7.16            | 7.197  | 7.332           | 8.064                   |
| STOX1  | Ek6SiMugyPdRoRlt6g | rs1694505  | 21.01                        | 20.02                                 | 0.387                | 7.89                         | 2.51                          | 0.3025 | 7.286  | 0.191                             | 7.119   | 7.16            | 7.197  | 7.332           | 8.064                   |
| STOX1  | Ek6SiMugyPdRoRlt6g | rs16925839 | 4.55                         | 4.35                                  | 0.089                | 1.43                         | 20.48                         | 0.4725 | 7.286  | 0.191                             | 7.119   | 7.16            | 7.197  | 7.332           | 8.064                   |
| STOX1  | Ek6SiMugyPdRoRlt6g | rs11818897 | 12.4                         | 11.82                                 | -0.25                | 3.95                         | 28.82                         | 0.075  | 7.286  | 0.191                             | 7.119   | 7.16            | 7.197  | 7.332           | 8.064                   |
| STOX1  | Ek6SiMugyPdRoRlt6g | rs10998461 | 3.3                          | 3.16                                  | -0.063               | 1.41                         | 29.14                         | 0.4825 | 7.286  | 0.191                             | 7.119   | 7.16            | 7.197  | 7.332           | 8.064                   |
| STOX1  | Ek6SiMugyPdRoRlt6g | rs1007042  | 3.36                         | 3.21                                  | 0.064                | 1.32                         | 29.59                         | 0.485  | 7.286  | 0.191                             | 7.119   | 7.16            | 7.197  | 7.332           | 8.064                   |
| STOX1  | Ek6SiMugyPdRoRlt6g | rs17470053 | 15.68                        | 14.95                                 | -0.31                | 6.12                         | 31.04                         | 0.12   | 7.286  | 0.191                             | 7.119   | 7.16            | 7.197  | 7.332           | 8.064                   |
| STOX1  | Ek6SiMugyPdRoRlt6g | rs1417941  | 6.44                         | 6.16                                  | -0.128               | 3.11                         | 31.48                         | 0.235  | 7.286  | 0.191                             | 7.119   | 7.16            | 7.197  | 7.332           | 8.064                   |
| STOX1  | Ek6SiMugyPdRoRlt6g | rs7903209  | 6.44                         | 6.16                                  | 0.128                | 2.87                         | -24.23                        | 0.235  | 7.286  | 0.191                             | 7.119   | 7.16            | 7.197  | 7.332           | 8.064                   |
| STOX1  | Ek6SiMugyPdRoRlt6g | rs4746797  | 4.87                         | 4.66                                  | 0.096                | 1.5                          | -21.19                        | 0.34   | 7.286  | 0.191                             | 7.119   | 7.16            | 7.197  | 7.332           | 8.064                   |
| STOX1  | Ek6SiMugyPdRoRlt6g | rs10509305 | 5.96                         | 5.70                                  | 0.121                | 3.08                         | -7.44                         | 0.2225 | 7.286  | 0.191                             | 7.119   | 7.16            | 7.197  | 7.332           | 8.064                   |
| STOX1  | Ek6SiMugyPdRoRlt6g | rs10509306 | 6.29                         | 6.01                                  | 0.128                | 2.46                         | -7.12                         | 0.1075 | 7.286  | 0.191                             | 7.119   | 7.16            | 7.197  | 7.332           | 8.064                   |
| STOX1  | Ek6SiMugyPdRoRlt6g | rs4472827  | 5.62                         | 5.38                                  | -0.113               | 2.53                         | -0.54                         | 0.2625 | 7.286  | 0.191                             | 7.119   | 7.16            | 7.197  | 7.332           | 8.064                   |
| STOX1  | Ek6SiMugyPdRoRlt6g | rs2394498  | 4.49                         | 4.30                                  | 0.09                 | 1.24                         | 38.89                         | 0.3655 | 7.286  | 0.191                             | 7.119   | 7.16            | 7.197  | 7.332           | 8.064                   |
| STX19  | iDX5lse77657U57J0  | rs13062355 | 10.11                        | 9.65                                  | 0.196                | 2.86                         | -44.7                         | 0.495  | 7.185  | 0.079                             | 7.108   | 7.128           | 7.153  | 7.219           | 7.464                   |
| STX19  | iDX5lse77657U57J0  | rs7644769  | 5.93                         | 5.67                                  | 0.117                | 1.4                          | -39                           | 0.405  | 7.185  | 0.079                             | 7.108   | 7.128           | 7.153  | 7.219           | 7.464                   |
| STX2   | KqF5dW47VF.X0K3tM4 | rs10219721 | 3.95                         | 3.78                                  | 0.079                | 0.94                         | 3.63                          | 0.0975 | 9.813  | 0.428                             | 8.615   | 9.529           | 9.815  | 10.106          | 10.963                  |
| STX2   | KqF5dW47VF.X0K3tM4 | rs10773819 | 19.54                        | 18.62                                 | -0.369               | 6.95                         | 4.88                          | 0.48   | 9.813  | 0.428                             | 8.615   | 9.529           | 9.815  | 10.106          | 10.963                  |
| STX2   | HpA467owbS7k5d3lKs | rs10773819 | 7.3                          | 6.97                                  | -0.143               | 4.08                         | 4.88                          | 0.48   | 7.521  | 0.216                             | 7.126   | 7.362           | 7.522  | 7.674           | 8.283                   |
| STX2   | KqF5dW47VF.X0K3tM4 | rs1554807  | 10.14                        | 9.67                                  | -0.205               | 5.2                          | 6.27                          | 0.4225 | 9.813  | 0.428                             | 8.615   | 9.529           | 9.815  | 10.106          | 10.963                  |
| STX2   | KqF5dW47VF.X0K3tM4 | rs1106369  | 19.54                        | 18.62                                 | -0.369               | 6.95                         | -23.72                        | 0.48   | 9.813  | 0.428                             | 8.615   | 9.529           | 9.815  | 10.106          | 10.963                  |
| STX2   | HpA467owbS7k5d3lKs | rs1106369  | 7.3                          | 6.97                                  | -0.143               | 4.08                         | -23.72                        | 0.48   | 7.521  | 0.216                             | 7.126   | 7.362           | 7.522  | 7.674           | 8.283                   |
| STX2   | KqF5dW47VF.X0K3tM4 | rs4334059  | 9.94                         | 9.49                                  | -0.201               | 5.23                         | -9.6                          | 0.42   | 9.813  | 0.428                             | 8.615   | 9.529           | 9.815  | 10.106          | 10.963                  |
| STX2   | KqF5dW47VF.X0K3tM4 | rs4644680  | 3.57                         | 3.41                                  | 0.068                | 2.45                         | -8.99                         | 0.2538 | 9.813  | 0.428                             | 8.615   | 9.529           | 9.815  | 10.106          | 10.963                  |
| STX2   | KqF5dW47VF.X0K3tM4 | rs7311067  | 9.23                         | 8.81                                  | -0.18                | 3.99                         | -2.6                          | 0.2525 | 9.813  | 0.428                             | 8.615   | 9.529           | 9.815  | 10.106          | 10.963                  |
| STX2   | HpA467owbS7k5d3lKs | rs7311067  | 5.11                         | 4.89                                  | -0.095               | 4.01                         | -2.6                          | 0.2525 | 7.521  | 0.216                             | 7.126   | 7.362           | 7.522  | 7.674           | 8.283                   |
| STX2   | KqF5dW47VF.X0K3tM4 | rs7962097  | 3.4                          | 3.26                                  | 0.067                | 2.04                         | 1.05                          | 0.2273 | 9.813  | 0.428                             | 8.615   | 9.529           | 9.815  | 10.106          | 10.963                  |
| STX2   | KqF5dW47VF.X0K3tM4 | rs10848218 | 12.74                        | 12.15                                 | 0.26                 | 4.34                         | 8.25                          | 0.4196 | 9.813  | 0.428                             | 8.615   | 9.529           | 9.815  | 10.106          | 10.963                  |
| STX2   | KqF5dW47VF.X0K3tM4 | rs7307055  | 5.19                         | 4.97                                  | -0.1                 | 1.88                         | 21.43                         | 0.3643 | 9.813  | 0.428                             | 8.615   | 9.529           | 9.815  | 10.106          | 10.963                  |
| STXBP4 | NuvQdJAR9eJF5xOUpA | rs11869726 | 6.99                         | 6.67                                  | 0.135                | 4                            | -22.64                        | 0.3025 | 7.284  | 0.106                             | 7.123   | 7.209           | 7.264  | 7.328           | 7.78                    |
| STXBP4 | NuvQdJAR9eJF5xOUpA | rs11870311 | 6.99                         | 6.67                                  | 0.135                | 4                            | -22.23                        | 0.3025 | 7.284  | 0.106                             | 7.123   | 7.209           | 7.264  | 7.328           | 7.78                    |
| STXBP4 | NuvQdJAR9eJF5xOUpA | rs11871939 | 6.99                         | 6.67                                  | 0.135                | 4                            | -2.36                         | 0.3025 | 7.284  | 0.106                             | 7.123   | 7.209           | 7.264  | 7.328           | 7.78                    |
| STXBP4 | NuvQdJAR9eJF5xOUpA | rs10852971 | 6.07                         | 5.80                                  | 0.117                | 3.41                         | 12.61                         | 0.2875 | 7.284  | 0.106                             | 7.123   | 7.209           | 7.264  | 7.328           | 7.78                    |
| STXBP4 | NuvQdJAR9eJF5xOUpA | rs958556   | 4.54                         | 4.34                                  | 0.089                | 1.83                         | 17.62                         | 0.165  | 7.284  | 0.106                             | 7.123   | 7.209           | 7.264  | 7.328           | 7.78                    |
| STXBP4 | NuvQdJAR9eJF5xOUpA | rs7225949  | 8.66                         | 8.26                                  | 0.172                | 5.3                          | 50.65                         | 0.4325 | 7.284  | 0.106                             | 7.123   | 7.209           | 7.264  | 7.328           | 7.78                    |
| STXBP4 | NuvQdJAR9eJF5xOUpA | rs2541244  | 5.33                         | 5.10                                  | -0.102               | 3.08                         | 54.04                         | 0.295  | 7.284  | 0.106                             | 7.123   | 7.209           | 7.264  | 7.328           | 7.78                    |
| STXBP4 | NuvQdJAR9eJF5xOUpA | rs1948000  | 8.87                         | 8.47                                  | 0.177                | 5.16                         | -93.73                        | 0.4246 | 7.284  | 0.106                             | 7.123   | 7.209           | 7.264  | 7.328           | 7.78                    |
| STXBP4 | NuvQdJAR9eJF5xOUpA | rs1026961  | 5.33                         | 5.10                                  | 0.102                | 3.05                         | -85.78                        | 0.295  | 7.284  | 0.106                             | 7.123   | 7.209           | 7.264  | 7.328           | 7.78                    |
| STXBP4 | NuvQdJAR9eJF5xOUpA | rs2628299  | 5.33                         | 5.10                                  | 0.102                | 3.05                         | -80.5                         | 0.295  | 7.284  | 0.106                             | 7.123   | 7.209           | 7.264  | 7.328           | 7.78                    |
| STXBP4 | NuvQdJAR9eJF5xOUpA | rs1548908  | 3.78                         | 3.62                                  | -0.071               | 2.2                          | -74                           | 0.215  | 7.284  | 0.106                             | 7.123   | 7.209           | 7.264  | 7.328           | 7.78                    |
| STXBP4 | NuvQdJAR9eJF5xOUpA | rs244363   | 9.1                          | 8.68                                  | -0.18                | 4.43                         | -52.56                        | 0.4221 | 7.284  | 0.106                             | 7.123   | 7.209           | 7.264  | 7.328           | 7.78                    |

| Symbol | Lumi nuID          | SNP        | Population-based association |                           |                      | Family-based association |                               |        | Transcript abundance (log2 scale) |                    |                 |        |                 |         | SNP mapping under probe |
|--------|--------------------|------------|------------------------------|---------------------------|----------------------|--------------------------|-------------------------------|--------|-----------------------------------|--------------------|-----------------|--------|-----------------|---------|-------------------------|
|        |                    |            | p-value (-log10)             | p-value (-log10), GC adj. | % Variance Explained | p-value (-log10)         | Distance from transcript (kb) | MAF    | Mean                              | Standard Deviation | 25th percentile | Median | 75th percentile | Maximum |                         |
| STXBP4 | NUvQdJAR9eJF5xOUpA | rs244340   | 9.26                         | 8.84                      | -0.182               | 4.43                     | -42.1                         | 0.425  | 7.284                             | 0.106              | 7.123           | 7.209  | 7.264           | 7.328   | 7.78                    |
| STXBP4 | NUvQdJAR9eJF5xOUpA | rs244292   | 9.41                         | 8.98                      | 0.186                | 4.49                     | -10.71                        | 0.4242 | 7.284                             | 0.106              | 7.123           | 7.209  | 7.264           | 7.328   | 7.78                    |
| STXBP4 | NUvQdJAR9eJF5xOUpA | rs244304   | 5.6                          | 5.35                      | -0.108               | 3.21                     | -3.49                         | 0.3075 | 7.284                             | 0.106              | 7.123           | 7.209  | 7.264           | 7.328   | 7.78                    |
| STXBP4 | NUvQdJAR9eJF5xOUpA | rs2529515  | 3.53                         | 3.38                      | 0.068                | 2.33                     | 5.68                          | 0.2275 | 7.284                             | 0.106              | 7.123           | 7.209  | 7.264           | 7.328   | 7.78                    |
| STXBP4 | NUvQdJAR9eJF5xOUpA | rs1564821  | 5.15                         | 4.92                      | -0.099               | 1.92                     | 7.48                          | 0.245  | 7.284                             | 0.106              | 7.123           | 7.209  | 7.264           | 7.328   | 7.78                    |
| STXBP4 | NUvQdJAR9eJF5xOUpA | rs9904768  | 3.98                         | 3.81                      | 0.074                | 2.21                     | 29.37                         | 0.215  | 7.284                             | 0.106              | 7.123           | 7.209  | 7.264           | 7.328   | 7.78                    |
| STXBP4 | NUvQdJAR9eJF5xOUpA | rs171511   | 5.36                         | 5.12                      | 0.102                | 3.43                     | 32.46                         | 0.335  | 7.284                             | 0.106              | 7.123           | 7.209  | 7.264           | 7.328   | 7.78                    |
| STXBP5 | xnTT3qL9TsunOS7oC4 | rs694625   | 3.85                         | 3.68                      | -0.075               | 1.52                     | -24.39                        | 0.4825 | 8.641                             | 0.256              | 7.184           | 8.511  | 8.669           | 8.813   | 9.363                   |
| STXBP5 | xnTT3qL9TsunOS7oC4 | rs2818867  | 3.5                          | 3.36                      | 0.069                | 1.43                     | -24.09                        | 0.4645 | 8.641                             | 0.256              | 7.184           | 8.511  | 8.669           | 8.813   | 9.363                   |
| STXBP5 | xnTT3qL9TsunOS7oC4 | rs7739314  | 3.77                         | 3.61                      | 0.082                | 1.53                     | 2.29                          | 0.4793 | 8.641                             | 0.256              | 7.184           | 8.511  | 8.669           | 8.813   | 9.363                   |
| STYXL1 | Wx4lI0XqpP_6uipSLs | rs8509     | 9.11                         | 8.70                      | -0.177               | 1.71                     | -9.08                         | 0.085  | 7.988                             | 0.225              | 7.527           | 7.837  | 7.97            | 8.105   | 8.803                   |
| STYXL1 | Wx4lI0XqpP_6uipSLs | rs9649665  | 9.11                         | 8.70                      | 0.177                | 1.49                     | 12.14                         | 0.0875 | 7.988                             | 0.225              | 7.527           | 7.837  | 7.97            | 8.105   | 8.803                   |
| SUMF1  | KqS0wne.VXdVAI9JgY | rs2819562  | 4.91                         | 4.70                      | -0.095               | 3.74                     | 0.78                          | 0.455  | 9.067                             | 0.287              | 8.517           | 8.863  | 9.043           | 9.262   | 9.938                   |
| SUMF1  | KqS0wne.VXdVAI9JgY | rs2662126  | 4.86                         | 4.65                      | -0.094               | 3.47                     | 7.6                           | 0.4525 | 9.067                             | 0.287              | 8.517           | 8.863  | 9.043           | 9.262   | 9.938                   |
| SUMF1  | KqS0wne.VXdVAI9JgY | rs11915920 | 5.28                         | 5.05                      | -0.102               | 3.04                     | 7.7                           | 0.4975 | 9.067                             | 0.287              | 8.517           | 8.863  | 9.043           | 9.262   | 9.938                   |
| SUMO3  | KTL3lz7X1eKdT55_uk | rs4818979  | 3.69                         | 3.53                      | 0.067                | 2.23                     | 17.55                         | 0.2275 | 11.377                            | 0.219              | 10.614          | 11.253 | 11.365          | 11.522  | 11.957                  |
| SUNC1  | Nq1OkRskJE3lIvrEgo | rs2686829  | 3.37                         | 3.23                      | -0.062               | 1.24                     | -41.99                        | 0.275  | 7.375                             | 0.147              | 7.14            | 7.267  | 7.348           | 7.46    | 8.297                   |
| SUOX   | r3Ur5SlvmKlKpEFf0  | rs2069408  | 5.23                         | 5.00                      | -0.101               | 2.75                     | -26.72                        | 0.35   | 8.094                             | 0.318              | 7.364           | 7.903  | 8.043           | 8.238   | 9.346                   |
| SUOX   | r3Ur5SlvmKlKpEFf0  | rs773107   | 6.4                          | 6.12                      | -0.129               | 3.76                     | -21.54                        | 0.3725 | 8.094                             | 0.318              | 7.364           | 7.903  | 8.043           | 8.238   | 9.346                   |
| SUOX   | r3Ur5SlvmKlKpEFf0  | rs10876864 | 4.21                         | 4.03                      | -0.083               | 2.45                     | 1.78                          | 0.4375 | 8.094                             | 0.318              | 7.364           | 7.903  | 8.043           | 8.238   | 9.346                   |
| SUOX   | r3Ur5SlvmKlKpEFf0  | rs1701704  | 5.95                         | 5.69                      | 0.118                | 2.72                     | 13.18                         | 0.3775 | 8.094                             | 0.318              | 7.364           | 7.903  | 8.043           | 8.238   | 9.346                   |
| SUPT3H | HfXV9AkcURch6A7qeo | rs1418433  | 10.09                        | 9.63                      | -0.202               | 3.1                      | -43.9                         | 0.3875 | 7.99                              | 0.173              | 7.514           | 7.881  | 7.991           | 8.113   | 8.504                   |
| SUPT3H | Q0s0Qd54IR5Je674p0 | rs1418433  | 5.47                         | 5.23                      | -0.107               | 2.42                     | -44.88                        | 0.3875 | 8.499                             | 0.345              | 7.452           | 8.258  | 8.478           | 8.717   | 9.547                   |
| SUPT3H | HfXV9AkcURch6A7qeo | rs10948172 | 9.25                         | 8.83                      | 0.183                | 4.97                     | -18.78                        | 0.305  | 7.99                              | 0.173              | 7.514           | 7.881  | 7.991           | 8.113   | 8.504                   |
| SUPT3H | Q0s0Qd54IR5Je674p0 | rs10948172 | 6.68                         | 6.39                      | 0.131                | 3.08                     | -19.76                        | 0.305  | 8.499                             | 0.345              | 7.452           | 8.258  | 8.478           | 8.717   | 9.547                   |
| SUPT3H | HfXV9AkcURch6A7qeo | rs857601   | 8.76                         | 8.36                      | -0.174               | 4.4                      | 8.74                          | 0.3005 | 7.99                              | 0.173              | 7.514           | 7.881  | 7.991           | 8.113   | 8.504                   |
| SUPT3H | Q0s0Qd54IR5Je674p0 | rs857601   | 6.65                         | 6.35                      | -0.131               | 2.98                     | 7.76                          | 0.3005 | 8.499                             | 0.345              | 7.452           | 8.258  | 8.478           | 8.717   | 9.547                   |
| SUPT3H | HfXV9AkcURch6A7qeo | rs3799968  | 13.53                        | 12.90                     | -0.268               | 4.69                     | 8.91                          | 0.4296 | 7.99                              | 0.173              | 7.514           | 7.881  | 7.991           | 8.113   | 8.504                   |
| SUPT3H | Q0s0Qd54IR5Je674p0 | rs3799968  | 6.38                         | 6.10                      | -0.128               | 4.99                     | 7.93                          | 0.4296 | 8.499                             | 0.345              | 7.452           | 8.258  | 8.478           | 8.717   | 9.547                   |
| SUPT3H | HfXV9AkcURch6A7qeo | rs9395051  | 13.68                        | 13.04                     | 0.27                 | 4.63                     | 29.25                         | 0.4225 | 7.99                              | 0.173              | 7.514           | 7.881  | 7.991           | 8.113   | 8.504                   |
| SUPT3H | Q0s0Qd54IR5Je674p0 | rs9395051  | 6.04                         | 5.78                      | 0.12                 | 4.43                     | 28.27                         | 0.4225 | 8.499                             | 0.345              | 7.452           | 8.258  | 8.478           | 8.717   | 9.547                   |
| SUPT3H | HfXV9AkcURch6A7qeo | rs3799977  | 12.83                        | 12.24                     | -0.25                | 6.04                     | 40.89                         | 0.4325 | 7.99                              | 0.173              | 7.514           | 7.881  | 7.991           | 8.113   | 8.504                   |
| SUPT3H | Q0s0Qd54IR5Je674p0 | rs3799977  | 7.61                         | 7.27                      | -0.15                | 4.72                     | 39.91                         | 0.4325 | 8.499                             | 0.345              | 7.452           | 8.258  | 8.478           | 8.717   | 9.547                   |
| SUPT3H | HfXV9AkcURch6A7qeo | rs7754378  | 14.94                        | 14.25                     | 0.293                | 5.62                     | 66.64                         | 0.4924 | 7.99                              | 0.173              | 7.514           | 7.881  | 7.991           | 8.113   | 8.504                   |
| SUPT3H | Q0s0Qd54IR5Je674p0 | rs7754378  | 7.36                         | 7.03                      | 0.147                | 4.6                      | 65.66                         | 0.4924 | 8.499                             | 0.345              | 7.452           | 8.258  | 8.478           | 8.717   | 9.547                   |
| SUPT3H | HfXV9AkcURch6A7qeo | rs9367211  | 13.99                        | 13.35                     | 0.276                | 4.94                     | 88.84                         | 0.4322 | 7.99                              | 0.173              | 7.514           | 7.881  | 7.991           | 8.113   | 8.504                   |
| SUPT3H | Q0s0Qd54IR5Je674p0 | rs9367211  | 6.36                         | 6.08                      | 0.127                | 4.53                     | 87.86                         | 0.4322 | 8.499                             | 0.345              | 7.452           | 8.258  | 8.478           | 8.717   | 9.547                   |
| SUPT3H | HfXV9AkcURch6A7qeo | rs608941   | 9.68                         | 9.24                      | -0.194               | 4.04                     | 92.27                         | 0.495  | 7.99                              | 0.173              | 7.514           | 7.881  | 7.991           | 8.113   | 8.504                   |
| SUPT3H | Q0s0Qd54IR5Je674p0 | rs608941   | 5                            | 4.78                      | -0.098               | 4.3                      | 91.29                         | 0.495  | 8.499                             | 0.345              | 7.452           | 8.258  | 8.478           | 8.717   | 9.547                   |
| SUPT3H | HfXV9AkcURch6A7qeo | rs12196818 | 12.8                         | 12.21                     | -0.25                | 6.18                     | 114.94                        | 0.4525 | 7.99                              | 0.173              | 7.514           | 7.881  | 7.991           | 8.113   | 8.504                   |
| SUPT3H | Q0s0Qd54IR5Je674p0 | rs12196818 | 7.42                         | 7.09                      | -0.146               | 5.03                     | 113.96                        | 0.4525 | 8.499                             | 0.345              | 7.452           | 8.258  | 8.478           | 8.717   | 9.547                   |
| SUPT3H | HfXV9AkcURch6A7qeo | rs12198308 | 8.83                         | 8.43                      | 0.174                | 4.62                     | 115.42                        | 0.3    | 7.99                              | 0.173              | 7.514           | 7.881  | 7.991           | 8.113   | 8.504                   |
| SUPT3H | Q0s0Qd54IR5Je674p0 | rs12198308 | 7.25                         | 6.92                      | 0.141                | 2.62                     | 114.44                        | 0.3    | 8.499                             | 0.345              | 7.452           | 8.258  | 8.478           | 8.717   | 9.547                   |
| SUPT3H | HfXV9AkcURch6A7qeo | rs12210292 | 9.17                         | 8.75                      | -0.179               | 4.43                     | 128.82                        | 0.27   | 7.99                              | 0.173              | 7.514           | 7.881  | 7.991           | 8.113   | 8.504                   |
| SUPT3H | Q0s0Qd54IR5Je674p0 | rs12210292 | 8.11                         | 7.74                      | -0.157               | 2.86                     | 127.84                        | 0.27   | 8.499                             | 0.345              | 7.452           | 8.258  | 8.478           | 8.717   | 9.547                   |
| SUPT3H | HfXV9AkcURch6A7qeo | rs9472409  | 15.12                        | 14.42                     | 0.292                | 6.99                     | 129.96                        | 0.49   | 7.99                              | 0.173              | 7.514           | 7.881  | 7.991           | 8.113   | 8.504                   |
| SUPT3H | Q0s0Qd54IR5Je674p0 | rs9472409  | 7.64                         | 7.30                      | 0.151                | 4.5                      | 128.98                        | 0.49   | 8.499                             | 0.345              | 7.452           | 8.258  | 8.478           | 8.717   | 9.547                   |
| SUPT3H | HfXV9AkcURch6A7qeo | rs13216116 | 15.12                        | 14.42                     | -0.292               | 6.96                     | 140.21                        | 0.49   | 7.99                              | 0.173              | 7.514           | 7.881  | 7.991           | 8.113   | 8.504                   |
| SUPT3H | Q0s0Qd54IR5Je674p0 | rs13216116 | 7.64                         | 7.30                      | -0.151               | 4.59                     | 139.23                        | 0.49   | 8.499                             | 0.345              | 7.452           | 8.258  | 8.478           | 8.717   | 9.547                   |
| SUPT3H | HfXV9AkcURch6A7qeo | rs10948190 | 13.81                        | 13.17                     | -0.272               | 4.9                      | 145.83                        | 0.425  | 7.99                              | 0.173              | 7.514           | 7.881  | 7.991           | 8.113   | 8.504                   |
| SUPT3H | Q0s0Qd54IR5Je674p0 | rs10948190 | 6.84                         | 6.53                      | -0.136               | 4.6                      | 144.85                        | 0.425  | 8.499                             | 0.345              | 7.452           | 8.258  | 8.478           | 8.717   | 9.547                   |
| SUPT3H | HfXV9AkcURch6A7qeo | rs2396369  | 10.78                        | 10.29                     | -0.212               | 4.37                     | 149.99                        | 0.345  | 7.99                              | 0.173              | 7.514           | 7.881  | 7.991           | 8.113   | 8.504                   |
| SUPT3H | HfXV9AkcURch6A7qeo | rs10948197 | 12.51                        | 11.94                     | -0.244               | 6                        | 171.02                        | 0.43   | 7.99                              | 0.173              | 7.514           | 7.881  | 7.991           | 8.113   | 8.504                   |
| SUPT3H | Q0s0Qd54IR5Je674p0 | rs10948197 | 8.1                          | 7.74                      | -0.159               | 4.8                      | 170.04                        | 0.43   | 8.499                             | 0.345              | 7.452           | 8.258  | 8.478           | 8.717   | 9.547                   |
| SUPT3H | HfXV9AkcURch6A7qeo | rs1329710  | 10.72                        | 10.23                     | 0.213                | 4.04                     | 172.66                        | 0.4925 | 7.99                              | 0.173              | 7.514           | 7.881  | 7.991           | 8.113   | 8.504                   |
| SUPT3H | Q0s0Qd54IR5Je674p0 | rs1329710  | 6.89                         | 6.58                      | 0.136                | 4.67                     | 171.68                        | 0.4925 | 8.499                             | 0.345              | 7.452           | 8.258  | 8.478           | 8.717   | 9.547                   |
| SUPT3H | HfXV9AkcURch6A7qeo | rs9381359  | 11.76                        | 11.22                     | -0.233               | 4.44                     | 194.16                        | 0.395  | 7.99                              | 0.173              | 7.514           | 7.881  | 7.991           | 8.113   | 8.504                   |
| SUPT3H | Q0s0Qd54IR5Je674p0 | rs9381359  | 5.18                         | 4.96                      | -0.101               | 3.11                     | 193.18                        | 0.395  | 8.499                             | 0.345              | 7.452           | 8.258  | 8.478           | 8.717   | 9.547                   |
| SUPT3H | HfXV9AkcURch6A7qeo | rs1285019  | 9.27                         | 8.85                      | -0.19                | 3.18                     | -178                          | 0.4513 | 7.99                              | 0.173              | 7.514           | 7.881  | 7.991           | 8.113   | 8.504                   |
| SUPT3H | Q0s0Qd54IR5Je674p0 | rs1285019  | 7.85                         | 7.49                      | -0.158               | 5.19                     | -177.9                        | 0.4513 | 8.499                             | 0.345              | 7.452           | 8.258  | 8.478           | 8.717   | 9.547                   |
| SUPT3H | HfXV9AkcURch6A7qeo | rs9463076  | 8.21                         | 7.84                      | 0.166                | 3.29                     | -174.31                       | 0.4825 | 7.99                              | 0.173              | 7.514           | 7.881  | 7.991           | 8.113   | 8.504                   |
| SUPT3H | Q0s0Qd54IR5Je674p0 | rs9463076  | 5.53                         | 5.29                      | 0.109                | 4.49                     | -174.21                       | 0.4825 | 8.499                             | 0.345              | 7.452           | 8.258  | 8.478           | 8.717   | 9.547                   |

| Symbol | Lumi nuID           | SNP        | Population-based association |                  | % Variance Explained | Family-based association |                  | Distance from transcript (kb) | MAF    | Mean  | Transcript abundance (log2 scale) |         |                 |        |                 | SNP mapping under probe |
|--------|---------------------|------------|------------------------------|------------------|----------------------|--------------------------|------------------|-------------------------------|--------|-------|-----------------------------------|---------|-----------------|--------|-----------------|-------------------------|
|        |                     |            | p-value (-log10)             | p-value (-log10) |                      | p-value (-log10)         | p-value (-log10) |                               |        |       | Standard Deviation                | Minimum | 25th percentile | Median | 75th percentile |                         |
| SUPT3H | HfXV9AkcURch6A7qeo  | rs9381373  | 9.39                         | 8.96             | 0.189                | 3.31                     | -169.76          | 0.4925                        | 7.99   | 0.173 | 7.514                             | 7.881   | 7.991           | 8.113  | 8.504           |                         |
| SUPT3H | Q0s0Qd54iR5Je674p0  | rs9381373  | 7.06                         | 6.74             | 0.14                 | 4.78                     | -169.67          | 0.4925                        | 8.499  | 0.345 | 7.452                             | 8.258   | 8.478           | 8.717  | 9.547           |                         |
| SUPT3H | HfXV9AkcURch6A7qeo  | rs2396425  | 12.44                        | 11.86            | -0.248               | 4.32                     | -168.65          | 0.4175                        | 7.99   | 0.173 | 7.514                             | 7.881   | 7.991           | 8.113  | 8.504           |                         |
| SUPT3H | Q0s0Qd54iR5Je674p0  | rs2396425  | 7.26                         | 6.94             | -0.146               | 4.93                     | -168.55          | 0.4175                        | 8.499  | 0.345 | 7.452                             | 8.258   | 8.478           | 8.717  | 9.547           |                         |
| SUPT3H | HfXV9AkcURch6A7qeo  | rs9472451  | 11.21                        | 10.70            | 0.221                | 5.16                     | -146.87          | 0.465                         | 7.99   | 0.173 | 7.514                             | 7.881   | 7.991           | 8.113  | 8.504           |                         |
| SUPT3H | Q0s0Qd54iR5Je674p0  | rs9472451  | 7.19                         | 6.86             | 0.141                | 5.16                     | -146.78          | 0.465                         | 8.499  | 0.345 | 7.452                             | 8.258   | 8.478           | 8.717  | 9.547           |                         |
| SUPT3H | HfXV9AkcURch6A7qeo  | rs10948222 | 13.2                         | 12.59            | 0.262                | 4.42                     | -101.25          | 0.41                          | 7.99   | 0.173 | 7.514                             | 7.881   | 7.991           | 8.113  | 8.504           |                         |
| SUPT3H | Q0s0Qd54iR5Je674p0  | rs10948222 | 6.25                         | 5.97             | 0.125                | 4.65                     | -101.16          | 0.41                          | 8.499  | 0.345 | 7.452                             | 8.258   | 8.478           | 8.717  | 9.547           |                         |
| SUPT3H | Q0s0Qd54iR5Je674p0  | rs12207402 | 3.54                         | 3.39             | -0.07                | 2                        | -99              | 0.093                         | 8.499  | 0.345 | 7.452                             | 8.258   | 8.478           | 8.717  | 9.547           |                         |
| SUPT3H | HfXV9AkcURch6A7qeo  | rs12529946 | 11.21                        | 10.70            | -0.221               | 4.93                     | -90.38           | 0.465                         | 7.99   | 0.173 | 7.514                             | 7.881   | 7.991           | 8.113  | 8.504           |                         |
| SUPT3H | Q0s0Qd54iR5Je674p0  | rs12529946 | 7.19                         | 6.86             | -0.141               | 5.23                     | -90.28           | 0.465                         | 8.499  | 0.345 | 7.452                             | 8.258   | 8.478           | 8.717  | 9.547           |                         |
| SUPT3H | HfXV9AkcURch6A7qeo  | rs12201899 | 7.62                         | 7.27             | -0.151               | 3.76                     | -47.47           | 0.3157                        | 7.99   | 0.173 | 7.514                             | 7.881   | 7.991           | 8.113  | 8.504           |                         |
| SUPT3H | Q0s0Qd54iR5Je674p0  | rs12201899 | 5.55                         | 5.31             | -0.108               | 3                        | -47.37           | 0.3157                        | 8.499  | 0.345 | 7.452                             | 8.258   | 8.478           | 8.717  | 9.547           |                         |
| SUPT3H | HfXV9AkcURch6A7qeo  | rs12199720 | 11.95                        | 11.40            | 0.246                | 3.53                     | -38.23           | 0.401                         | 7.99   | 0.173 | 7.514                             | 7.881   | 7.991           | 8.113  | 8.504           |                         |
| SUPT3H | Q0s0Qd54iR5Je674p0  | rs12199720 | 5.53                         | 5.29             | 0.113                | 4.12                     | -38.13           | 0.401                         | 8.499  | 0.345 | 7.452                             | 8.258   | 8.478           | 8.717  | 9.547           |                         |
| SUPT3H | Q0s0Qd54iR5Je674p0  | rs17209755 | 3.37                         | 3.22             | 0.062                | 2.48                     | -35.05           | 0.12                          | 8.499  | 0.345 | 7.452                             | 8.258   | 8.478           | 8.717  | 9.547           |                         |
| SUPT3H | HfXV9AkcURch6A7qeo  | rs10807321 | 7.39                         | 7.06             | -0.148               | 3.02                     | -14.7            | 0.3112                        | 7.99   | 0.173 | 7.514                             | 7.881   | 7.991           | 8.113  | 8.504           |                         |
| SUPT3H | Q0s0Qd54iR5Je674p0  | rs10807321 | 5.54                         | 5.29             | -0.108               | 3.05                     | -14.6            | 0.3112                        | 8.499  | 0.345 | 7.452                             | 8.258   | 8.478           | 8.717  | 9.547           |                         |
| SUPT3H | HfXV9AkcURch6A7qeo  | rs12208924 | 11.21                        | 10.70            | 0.221                | 5.16                     | -3.62            | 0.465                         | 7.99   | 0.173 | 7.514                             | 7.881   | 7.991           | 8.113  | 8.504           |                         |
| SUPT3H | Q0s0Qd54iR5Je674p0  | rs12208924 | 7.19                         | 6.86             | 0.141                | 5.16                     | -3.52            | 0.465                         | 8.499  | 0.345 | 7.452                             | 8.258   | 8.478           | 8.717  | 9.547           |                         |
| SUPT3H | HfXV9AkcURch6A7qeo  | rs1321081  | 13.86                        | 13.22            | -0.27                | 4.65                     | 9.94             | 0.4075                        | 7.99   | 0.173 | 7.514                             | 7.881   | 7.991           | 8.113  | 8.504           |                         |
| SUPT3H | Q0s0Qd54iR5Je674p0  | rs1321081  | 6.54                         | 6.25             | -0.129               | 5                        | 10.03            | 0.4075                        | 8.499  | 0.345 | 7.452                             | 8.258   | 8.478           | 8.717  | 9.547           |                         |
| SUPT3H | HfXV9AkcURch6A7qeo  | rs17288341 | 7.98                         | 7.62             | 0.156                | 3.81                     | 12.31            | 0.3225                        | 7.99   | 0.173 | 7.514                             | 7.881   | 7.991           | 8.113  | 8.504           |                         |
| SUPT3H | Q0s0Qd54iR5Je674p0  | rs17288341 | 6.33                         | 6.05             | 0.122                | 3.11                     | 12.41            | 0.3225                        | 8.499  | 0.345 | 7.452                             | 8.258   | 8.478           | 8.717  | 9.547           |                         |
| SUPT3H | Q0s0Qd54iR5Je674p0  | rs1321080  | 6.1                          | 5.83             | 0.118                | 2.18                     | 12.75            | 0.275                         | 8.499  | 0.345 | 7.452                             | 8.258   | 8.478           | 8.717  | 9.547           |                         |
| SUPT3H | HfXV9AkcURch6A7qeo  | rs1321080  | 5.34                         | 5.10             | 0.103                | 2.52                     | 12.65            | 0.275                         | 7.99   | 0.173 | 7.514                             | 7.881   | 7.991           | 8.113  | 8.504           |                         |
| SUPT3H | HfXV9AkcURch6A7qeo  | rs9296459  | 5.81                         | 5.56             | -0.112               | 4.01                     | 23.13            | 0.375                         | 7.99   | 0.173 | 7.514                             | 7.881   | 7.991           | 8.113  | 8.504           |                         |
| SUPT3H | Q0s0Qd54iR5Je674p0  | rs9296459  | 5.33                         | 5.10             | -0.101               | 2.87                     | 23.22            | 0.375                         | 8.499  | 0.345 | 7.452                             | 8.258   | 8.478           | 8.717  | 9.547           |                         |
| SURF6  | rSieu4e8UhlpB44AJU  | rs597411   | 3.52                         | 3.38             | 0.068                | 1.2                      | -4.93            | 0.3075                        | 7.879  | 0.215 | 7.13                              | 7.718   | 7.859           | 8.054  | 8.405           |                         |
| SURF6  | rSieu4e8UhlpB44AJU  | rs886090   | 11.57                        | 11.04            | -0.229               | 4.2                      | 1.95             | 0.3375                        | 7.879  | 0.215 | 7.13                              | 7.718   | 7.859           | 8.054  | 8.405           |                         |
| SURF6  | rSieu4e8UhlpB44AJU  | rs12763    | 9.8                          | 9.36             | -0.196               | 4.2                      | 24.22            | 0.355                         | 7.879  | 0.215 | 7.13                              | 7.718   | 7.859           | 8.054  | 8.405           |                         |
| SYNGR2 | cp.Ogfsv4EKS6Q1IV0  | rs12452081 | 3.38                         | 3.23             | -0.064               | 3.85                     | 3.68             | 0.2625                        | 7.161  | 0.039 | 7.111                             | 7.135   | 7.153           | 7.177  | 7.339           |                         |
| SYNGR2 | cp.Ogfsv4EKS6Q1IV0  | rs1071664  | 4.2                          | 4.02             | -0.082               | 2.95                     | 14.03            | 0.37                          | 7.161  | 0.039 | 7.111                             | 7.135   | 7.153           | 7.177  | 7.339           |                         |
| SYNGR3 | 0Ei6Ve7r1fxfp9eIS0  | rs740580   | 3.99                         | 3.81             | -0.083               | 1.18                     | -28.9            | 0.1275                        | 7.134  | 0.025 | 7.102                             | 7.117   | 7.127           | 7.144  | 7.261           |                         |
| SYNGR3 | 0Ei6Ve7r1fxfp9eIS0  | rs7190048  | 3.34                         | 3.20             | -0.068               | 2.31                     | 1.52             | 0.4495                        | 7.134  | 0.025 | 7.102                             | 7.117   | 7.127           | 7.144  | 7.261           |                         |
| SYNGR3 | 0Ei6Ve7r1fxfp9eIS0  | rs1058474  | 7.08                         | 6.76             | 0.145                | 1.15                     | 4.52             | 0.1985                        | 7.134  | 0.025 | 7.102                             | 7.117   | 7.127           | 7.144  | 7.261           |                         |
| SYS1   | HU3uvomXf6jOfQrfuU  | rs1008953  | 9.89                         | 9.44             | -0.196               | 2.74                     | -10.97           | 0.1925                        | 9.269  | 0.198 | 8.659                             | 9.136   | 9.26            | 9.384  | 9.893           |                         |
| SYS1   | HU3uvomXf6jOfQrfuU  | rs4812893  | 5.5                          | 5.26             | -0.107               | 1.62                     | -0.87            | 0.3125                        | 9.269  | 0.198 | 8.659                             | 9.136   | 9.26            | 9.384  | 9.893           |                         |
| SYS1   | HU3uvomXf6jOfQrfuU  | rs6032142  | 5.57                         | 5.32             | 0.108                | 1.53                     | -2.44            | 0.3175                        | 9.269  | 0.198 | 8.659                             | 9.136   | 9.26            | 9.384  | 9.893           |                         |
| SYS1   | HU3uvomXf6jOfQrfuU  | rs707576   | 5.64                         | 5.40             | 0.11                 | 1.59                     | -1.38            | 0.3191                        | 9.269  | 0.198 | 8.659                             | 9.136   | 9.26            | 9.384  | 9.893           |                         |
| SYS1   | HU3uvomXf6jOfQrfuU  | rs2743439  | 9.89                         | 9.44             | 0.196                | 2.74                     | 1.79             | 0.1925                        | 9.269  | 0.198 | 8.659                             | 9.136   | 9.26            | 9.384  | 9.893           |                         |
| SYS1   | HU3uvomXf6jOfQrfuU  | rs2252731  | 4.52                         | 4.33             | 0.09                 | 0.86                     | 10.29            | 0.0575                        | 9.269  | 0.198 | 8.659                             | 9.136   | 9.26            | 9.384  | 9.893           |                         |
| SYS1   | HU3uvomXf6jOfQrfuU  | rs1028307  | 9.22                         | 8.81             | 0.183                | 2.46                     | 47.76            | 0.195                         | 9.269  | 0.198 | 8.659                             | 9.136   | 9.26            | 9.384  | 9.893           |                         |
| SYTL2  | E4IQPUenXUeAHHAWug  | rs431606   | 3.42                         | 3.28             | 0.058                | 3.82                     | -26.21           | 0.33                          | 8.443  | 0.315 | 7.539                             | 8.246   | 8.45            | 8.64   | 9.425           |                         |
| SYTL2  | E4IQPUenXUeAHHAWug  | rs290180   | 3.55                         | 3.40             | 0.06                 | 3.4                      | -14.6            | 0.3225                        | 8.443  | 0.315 | 7.539                             | 8.246   | 8.45            | 8.64   | 9.425           |                         |
| SYTL2  | E4IQPUenXUeAHHAWug  | rs290179   | 5.7                          | 5.45             | -0.104               | 3.34                     | -5.2             | 0.3925                        | 8.443  | 0.315 | 7.539                             | 8.246   | 8.45            | 8.64   | 9.425           |                         |
| SYTL2  | E4IQPUenXUeAHHAWug  | rs290198   | 4.76                         | 4.55             | -0.085               | 3.34                     | -10.54           | 0.4325                        | 8.443  | 0.315 | 7.539                             | 8.246   | 8.45            | 8.64   | 9.425           |                         |
| SYTL2  | E4IQPUenXUeAHHAWug  | rs17148355 | 4.23                         | 4.05             | -0.076               | 2.2                      | -3.88            | 0.0635                        | 8.443  | 0.315 | 7.539                             | 8.246   | 8.45            | 8.64   | 9.425           |                         |
| SYTL2  | E4IQPUenXUeAHHAWug  | rs290193   | 5.67                         | 5.42             | -0.102               | 3.49                     | -1.14            | 0.4325                        | 8.443  | 0.315 | 7.539                             | 8.246   | 8.45            | 8.64   | 9.425           |                         |
| SYTL2  | E4IQPUenXUeAHHAWug  | rs641393   | 3.4                          | 3.26             | -0.059               | 2.21                     | 6.14             | 0.3725                        | 8.443  | 0.315 | 7.539                             | 8.246   | 8.45            | 8.64   | 9.425           |                         |
| SYTL2  | E4IQPUenXUeAHHAWug  | rs580459   | 3.76                         | 3.60             | -0.066               | 1.87                     | 6.29             | 0.3475                        | 8.443  | 0.315 | 7.539                             | 8.246   | 8.45            | 8.64   | 9.425           |                         |
| TADA2L | Wh62KQIR00lyO4EAvo  | rs2946340  | 3.77                         | 3.61             | -0.073               | 0.3                      | -17.6            | 0.1575                        | 7.439  | 0.219 | 7.107                             | 7.263   | 7.383           | 7.583  | 8.059           |                         |
| TAFF1B | 0oR.JfSoteAiApQ0eeE | rs2245344  | 4.14                         | 3.96             | -0.079               | 1.62                     | 2.1              | 0.4975                        | 8.246  | 0.237 | 7.153                             | 8.067   | 8.249           | 8.405  | 8.896           |                         |
| TAGLN  | KjupQIR7XX6aQCVpGg  | rs4938349  | 4.31                         | 4.12             | 0.08                 | 2.39                     | -48.12           | 0.2889                        | 8.525  | 0.424 | 7.564                             | 8.228   | 8.454           | 8.759  | 10.267          | Yes                     |
| TAGLN  | KjupQIR7XX6aQCVpGg  | rs7122944  | 3.84                         | 3.67             | 0.072                | 1.56                     | -35.42           | 0.1425                        | 8.525  | 0.424 | 7.564                             | 8.228   | 8.454           | 8.759  | 10.267          | Yes                     |
| TAGLN  | KjupQIR7XX6aQCVpGg  | rs7112513  | 3.68                         | 3.52             | 0.068                | 1.47                     | -32.68           | 0.1407                        | 8.525  | 0.424 | 7.564                             | 8.228   | 8.454           | 8.759  | 10.267          | Yes                     |
| TAGLN  | KjupQIR7XX6aQCVpGg  | rs4938353  | 4.65                         | 4.45             | -0.087               | 1.94                     | -23.84           | 0.2325                        | 8.525  | 0.424 | 7.564                             | 8.228   | 8.454           | 8.759  | 10.267          | Yes                     |
| TAGLN  | KjupQIR7XX6aQCVpGg  | rs4938354  | 4.58                         | 4.38             | 0.085                | 2.45                     | -18.88           | 0.2925                        | 8.525  | 0.424 | 7.564                             | 8.228   | 8.454           | 8.759  | 10.267          | Yes                     |
| TAGLN  | KjupQIR7XX6aQCVpGg  | rs90192    | 4.29                         | 4.11             | 0.079                | 2.17                     | -10.69           | 0.2025                        | 8.525  | 0.424 | 7.564                             | 8.228   | 8.454           | 8.759  | 10.267          | Yes                     |
| TAGLN  | KjupQIR7XX6aQCVpGg  | rs236919   | 5.46                         | 5.22             | -0.106               | 2.6                      | 19.85            | 0.4422                        | 8.525  | 0.424 | 7.564                             | 8.228   | 8.454           | 8.759  | 10.267          | Yes                     |
| TAGLN  | KjupQIR7XX6aQCVpGg  | rs500389   | 4.67                         | 4.47             | -0.089               | 1.59                     | 25.09            | 0.4675                        | 8.525  | 0.424 | 7.564                             | 8.228   | 8.454           | 8.759  | 10.267          | Yes                     |
| TAGLN2 | EIG42xl6kUFmqbKQ    | rs16831153 | 4.33                         | 4.15             | 0.082                | 2.22                     | 25.43            | 0.1935                        | 10.972 | 0.673 | 7.276                             | 10.585  | 10.942          | 11.416 | 12.817          |                         |

| Symbol | Lumi nuID           | SNP        | Population-based             | Population-based                      | % Variance Explained | Family-based                 | Distance from transcript (kb) | MAF    | Mean  | Transcript abundance (log2 scale) |         |                 |        |                 | SNP mapping under probe |
|--------|---------------------|------------|------------------------------|---------------------------------------|----------------------|------------------------------|-------------------------------|--------|-------|-----------------------------------|---------|-----------------|--------|-----------------|-------------------------|
|        |                     |            | association p-value (-log10) | association p-value (-log10), GC adj. |                      | association p-value (-log10) |                               |        |       | Standard Deviation                | Minimum | 25th percentile | Median | 75th percentile |                         |
| TAP2   | 3H5erRMnCGuih_VJ.k  | rs13195441 | 7.86                         | 7.51                                  | 0.147                | 2.21                         | -49.89                        | 0.28   | 9.879 | 0.372                             | 8.883   | 9.625           | 9.859  | 10.135          | 10.944                  |
| TAP2   | 3H5erRMnCGuih_VJ.k  | rs2857204  | 8.4                          | 8.02                                  | -0.157               | 2.41                         | -48.84                        | 0.3425 | 9.879 | 0.372                             | 8.883   | 9.625           | 9.859  | 10.135          | 10.944                  |
| TAP2   | Zr.dcToWEIA319F6Rk  | rs2857204  | 4.06                         | 3.88                                  | 0.078                | 1.22                         | -45.26                        | 0.3425 | 7.935 | 0.392                             | 7.089   | 7.671           | 7.923  | 8.18            | 9.028                   |
| TAP2   | 3H5erRMnCGuih_VJ.k  | rs9276644  | 4.85                         | 4.64                                  | -0.094               | 1.8                          | -48.14                        | 0.335  | 9.879 | 0.372                             | 8.883   | 9.625           | 9.859  | 10.135          | 10.944                  |
| TAP2   | 3H5erRMnCGuih_VJ.k  | rs719654   | 5.91                         | 5.64                                  | 0.111                | 1.9                          | -41.05                        | 0.205  | 9.879 | 0.372                             | 8.883   | 9.625           | 9.859  | 10.135          | 10.944                  |
| TAP2   | Zr.dcToWEIA319F6Rk  | rs719654   | 4.18                         | 4.00                                  | -0.082               | 0.77                         | -37.47                        | 0.205  | 7.935 | 0.392                             | 7.089   | 7.671           | 7.923  | 8.18            | 9.028                   |
| TAP2   | 3H5erRMnCGuih_VJ.k  | rs9276711  | 5.02                         | 4.80                                  | 0.1                  | 1.82                         | -35.89                        | 0.3342 | 9.879 | 0.372                             | 8.883   | 9.625           | 9.859  | 10.135          | 10.944                  |
| TAP2   | 3H5erRMnCGuih_VJ.k  | rs3948793  | 4.77                         | 4.56                                  | -0.093               | 1.66                         | -33.74                        | 0.3367 | 9.879 | 0.372                             | 8.883   | 9.625           | 9.859  | 10.135          | 10.944                  |
| TAP2   | 3H5erRMnCGuih_VJ.k  | rs2621373  | 6.56                         | 6.27                                  | 0.123                | 1.84                         | -28.06                        | 0.29   | 9.879 | 0.372                             | 8.883   | 9.625           | 9.859  | 10.135          | 10.944                  |
| TAP2   | Zr.dcToWEIA319F6Rk  | rs2621373  | 4.88                         | 4.67                                  | -0.097               | 0.9                          | -24.48                        | 0.29   | 7.935 | 0.392                             | 7.089   | 7.671           | 7.923  | 8.18            | 9.028                   |
| TAP2   | 3H5erRMnCGuih_VJ.k  | rs2219893  | 5.56                         | 5.32                                  | 0.105                | 1.62                         | -23.52                        | 0.2985 | 9.879 | 0.372                             | 8.883   | 9.625           | 9.859  | 10.135          | 10.944                  |
| TAP2   | Zr.dcToWEIA319F6Rk  | rs2219893  | 4.43                         | 4.24                                  | -0.088               | 0.85                         | -19.95                        | 0.2985 | 7.935 | 0.392                             | 7.089   | 7.671           | 7.923  | 8.18            | 9.028                   |
| TAP2   | 3H5erRMnCGuih_VJ.k  | rs2856997  | 5.54                         | 5.30                                  | 0.103                | 1.17                         | -11.41                        | 0.392  | 9.879 | 0.372                             | 8.883   | 9.625           | 9.859  | 10.135          | 10.944                  |
| TAP2   | Zr.dcToWEIA319F6Rk  | rs2856997  | 4.55                         | 4.36                                  | -0.089               | 1.24                         | -7.83                         | 0.392  | 7.935 | 0.392                             | 7.089   | 7.671           | 7.923  | 8.18            | 9.028                   |
| TAP2   | Zr.dcToWEIA319F6Rk  | rs2071474  | 6.66                         | 6.36                                  | 0.135                | 1.07                         | -7.03                         | 0.2675 | 7.935 | 0.392                             | 7.089   | 7.671           | 7.923  | 8.18            | 9.028                   |
| TAP2   | 3H5erRMnCGuih_VJ.k  | rs2071474  | 5.98                         | 5.71                                  | -0.113               | 1.88                         | -10.61                        | 0.2675 | 9.879 | 0.372                             | 8.883   | 9.625           | 9.859  | 10.135          | 10.944                  |
| TAP2   | 3H5erRMnCGuih_VJ.k  | rs2071473  | 10.35                        | 9.87                                  | -0.194               | 3.01                         | -10.58                        | 0.3375 | 9.879 | 0.372                             | 8.883   | 9.625           | 9.859  | 10.135          | 10.944                  |
| TAP2   | Zr.dcToWEIA319F6Rk  | rs2071473  | 4.29                         | 4.10                                  | 0.084                | 1.32                         | -7                            | 0.3375 | 7.935 | 0.392                             | 7.089   | 7.671           | 7.923  | 8.18            | 9.028                   |
| TAP2   | Zr.dcToWEIA319F6Rk  | rs2071472  | 6.66                         | 6.36                                  | 0.135                | 1.07                         | -4.99                         | 0.2675 | 7.935 | 0.392                             | 7.089   | 7.671           | 7.923  | 8.18            | 9.028                   |
| TAP2   | 3H5erRMnCGuih_VJ.k  | rs2071472  | 5.98                         | 5.71                                  | -0.113               | 1.88                         | -8.57                         | 0.2675 | 9.879 | 0.372                             | 8.883   | 9.625           | 9.859  | 10.135          | 10.944                  |
| TAP2   | Zr.dcToWEIA319F6Rk  | rs2071469  | 5.31                         | 5.08                                  | 0.105                | 0.77                         | -4.83                         | 0.3425 | 7.935 | 0.392                             | 7.089   | 7.671           | 7.923  | 8.18            | 9.028                   |
| TAP2   | Zr.dcToWEIA319F6Rk  | rs1894406  | 4.97                         | 4.76                                  | 0.099                | 0.72                         | -2.55                         | 0.3125 | 7.935 | 0.392                             | 7.089   | 7.671           | 7.923  | 8.18            | 9.028                   |
| TAP2   | 3H5erRMnCGuih_VJ.k  | rs2857106  | 7.45                         | 7.12                                  | 0.145                | 1.9                          | -5.62                         | 0.1641 | 9.879 | 0.372                             | 8.883   | 9.625           | 9.859  | 10.135          | 10.944                  |
| TAP2   | Zr.dcToWEIA319F6Rk  | rs2857106  | 4.82                         | 4.61                                  | -0.098               | 0.76                         | -2.04                         | 0.1641 | 7.935 | 0.392                             | 7.089   | 7.671           | 7.923  | 8.18            | 9.028                   |
| TAP2   | 3H5erRMnCGuih_VJ.k  | rs9784758  | 3.9                          | 3.74                                  | 0.074                | 0.98                         | -4.68                         | 0.0725 | 9.879 | 0.372                             | 8.883   | 9.625           | 9.859  | 10.135          | 10.944                  |
| TAP2   | Zr.dcToWEIA319F6Rk  | rs241453   | 7.53                         | 7.19                                  | -0.153               | 1.24                         | 6.62                          | 0.225  | 7.935 | 0.392                             | 7.089   | 7.671           | 7.923  | 8.18            | 9.028                   |
| TAP2   | 3H5erRMnCGuih_VJ.k  | rs241453   | 7.18                         | 6.86                                  | 0.136                | 2.17                         | 3.04                          | 0.225  | 9.879 | 0.372                             | 8.883   | 9.625           | 9.859  | 10.135          | 10.944                  |
| TAP2   | Zr.dcToWEIA319F6Rk  | rs241452   | 7.48                         | 7.14                                  | -0.153               | 1.24                         | 6.74                          | 0.2236 | 7.935 | 0.392                             | 7.089   | 7.671           | 7.923  | 8.18            | 9.028                   |
| TAP2   | 3H5erRMnCGuih_VJ.k  | rs241452   | 6.83                         | 6.53                                  | 0.136                | 2.17                         | 3.16                          | 0.2236 | 9.879 | 0.372                             | 8.883   | 9.625           | 9.859  | 10.135          | 10.944                  |
| TAP2   | Zr.dcToWEIA319F6Rk  | rs241448   | 7.56                         | 7.22                                  | 0.154                | 1.24                         | 7.08                          | 0.2261 | 7.935 | 0.392                             | 7.089   | 7.671           | 7.923  | 8.18            | 9.028                   |
| TAP2   | 3H5erRMnCGuih_VJ.k  | rs241448   | 7.08                         | 6.76                                  | -0.135               | 2.23                         | 3.5                           | 0.2261 | 9.879 | 0.372                             | 8.883   | 9.625           | 9.859  | 10.135          | 10.944                  |
| TAP2   | Zr.dcToWEIA319F6Rk  | rs241447   | 7.53                         | 7.19                                  | -0.154               | 1.34                         | 7.14                          | 0.2236 | 7.935 | 0.392                             | 7.089   | 7.671           | 7.923  | 8.18            | 9.028                   |
| TAP2   | 3H5erRMnCGuih_VJ.k  | rs241447   | 7.02                         | 6.71                                  | 0.134                | 1.93                         | 3.56                          | 0.2236 | 9.879 | 0.372                             | 8.883   | 9.625           | 9.859  | 10.135          | 10.944                  |
| TAP2   | Zr.dcToWEIA319F6Rk  | rs241440   | 8.11                         | 7.74                                  | 0.165                | 1.29                         | 7.75                          | 0.225  | 7.935 | 0.392                             | 7.089   | 7.671           | 7.923  | 8.18            | 9.028                   |
| TAP2   | 3H5erRMnCGuih_VJ.k  | rs241440   | 6.49                         | 6.20                                  | -0.123               | 1.91                         | 4.17                          | 0.225  | 9.879 | 0.372                             | 8.883   | 9.625           | 9.859  | 10.135          | 10.944                  |
| TAP2   | Zr.dcToWEIA319F6Rk  | rs241437   | 4.92                         | 4.71                                  | 0.098                | 1.23                         | 8.07                          | 0.315  | 7.935 | 0.392                             | 7.089   | 7.671           | 7.923  | 8.18            | 9.028                   |
| TAP2   | 3H5erRMnCGuih_VJ.k  | rs241437   | 3.82                         | 3.66                                  | -0.07                | 0.83                         | 4.5                           | 0.315  | 9.879 | 0.372                             | 8.883   | 9.625           | 9.859  | 10.135          | 10.944                  |
| TAP2   | Zr.dcToWEIA319F6Rk  | rs4576294  | 4.38                         | 4.19                                  | -0.086               | 0.38                         | -8                            | 0.0925 | 7.935 | 0.392                             | 7.089   | 7.671           | 7.923  | 8.18            | 9.028                   |
| TAP2   | 3H5erRMnCGuih_VJ.k  | rs9357155  | 6.95                         | 6.64                                  | 0.135                | 3.11                         | 3.3                           | 0.11   | 9.879 | 0.372                             | 8.883   | 9.625           | 9.859  | 10.135          | 10.944                  |
| TAP2   | 3H5erRMnCGuih_VJ.k  | rs2071543  | 5.19                         | 4.97                                  | -0.1                 | 2.59                         | 5.08                          | 0.12   | 9.879 | 0.372                             | 8.883   | 9.625           | 9.859  | 10.135          | 10.944                  |
| TAPBPL | QGEV9V CVUScdQVAQQU | rs11569361 | 3.43                         | 3.28                                  | -0.064               | 2.26                         | -7.44                         | 0.2775 | 9.12  | 0.347                             | 8.346   | 8.845           | 9.111  | 9.359           | 10.159                  |
| TAPBPL | QGEV9V CVUScdQVAQQU | rs2041385  | 9.99                         | 9.53                                  | 0.194                | 4.48                         | 1.04                          | 0.2975 | 9.12  | 0.347                             | 8.346   | 8.845           | 9.111  | 9.359           | 10.159                  |
| TAPBPL | QGEV9V CVUScdQVAQQU | rs2532501  | 3.84                         | 3.67                                  | 0.075                | 2.71                         | 1.5                           | 0.2975 | 9.12  | 0.347                             | 8.346   | 8.845           | 9.111  | 9.359           | 10.159                  |
| TAPBPL | QGEV9V CVUScdQVAQQU | rs2532497  | 10.01                        | 9.55                                  | -0.195               | 4.68                         | 2.96                          | 0.295  | 9.12  | 0.347                             | 8.346   | 8.845           | 9.111  | 9.359           | 10.159                  |
| TAPBPL | QGEV9V CVUScdQVAQQU | rs12964    | 7.96                         | 7.60                                  | -0.158               | 3.32                         | 0.73                          | 0.4925 | 9.12  | 0.347                             | 8.346   | 8.845           | 9.111  | 9.359           | 10.159                  |
| TAPBPL | QGEV9V CVUScdQVAQQU | rs1017101  | 9.77                         | 9.32                                  | 0.192                | 4.06                         | 2.84                          | 0.304  | 9.12  | 0.347                             | 8.346   | 8.845           | 9.111  | 9.359           | 10.159                  |
| TAPBPL | QGEV9V CVUScdQVAQQU | rs2534721  | 8.61                         | 8.22                                  | -0.173               | 3.84                         | 8.68                          | 0.29   | 9.12  | 0.347                             | 8.346   | 8.845           | 9.111  | 9.359           | 10.159                  |
| TAPBPL | QGEV9V CVUScdQVAQQU | rs1048402  | 3.82                         | 3.65                                  | -0.074               | 2.09                         | 29.71                         | 0.2825 | 9.12  | 0.347                             | 8.346   | 8.845           | 9.111  | 9.359           | 10.159                  |
| TAPBPL | QGEV9V CVUScdQVAQQU | rs1001127  | 8.57                         | 8.18                                  | -0.17                | 3.69                         | 30.28                         | 0.294  | 9.12  | 0.347                             | 8.346   | 8.845           | 9.111  | 9.359           | 10.159                  |
| TAPBPL | QGEV9V CVUScdQVAQQU | rs7134136  | 4.02                         | 3.85                                  | -0.079               | 1.99                         | 38.04                         | 0.2825 | 9.12  | 0.347                             | 8.346   | 8.845           | 9.111  | 9.359           | 10.159                  |
| TARP   | xAgiQRj3qNUoqgRTgg  | rs3778893  | 5.44                         | 5.20                                  | -0.109               | 3.21                         | -45.1                         | 0.2111 | 8.733 | 0.499                             | 7.461   | 8.435           | 8.734  | 9.018           | 11.2                    |
| TARP   | xAgiQRj3qNUoqgRTgg  | rs10226230 | 3.29                         | 3.15                                  | -0.063               | 1.2                          | -29.95                        | 0.4675 | 8.733 | 0.499                             | 7.461   | 8.435           | 8.734  | 9.018           | 11.2                    |
| TARP   | xAgiQRj3qNUoqgRTgg  | rs2240825  | 4.11                         | 3.93                                  | -0.085               | 0.66                         | -10.97                        | 0.4315 | 8.733 | 0.499                             | 7.461   | 8.435           | 8.734  | 9.018           | 11.2                    |
| TARP   | xAgiQRj3qNUoqgRTgg  | rs7782269  | 4.78                         | 4.57                                  | -0.098               | 2.05                         | 5.34                          | 0.3575 | 8.733 | 0.499                             | 7.461   | 8.435           | 8.734  | 9.018           | 11.2                    |
| TARP   | xAgiQRj3qNUoqgRTgg  | rs1546833  | 4.04                         | 3.86                                  | -0.081               | 1.73                         | 10.44                         | 0.3475 | 8.733 | 0.499                             | 7.461   | 8.435           | 8.734  | 9.018           | 11.2                    |
| TARP   | xAgiQRj3qNUoqgRTgg  | rs1860516  | 3.91                         | 3.74                                  | 0.077                | 2.82                         | 12.73                         | 0.2375 | 8.733 | 0.499                             | 7.461   | 8.435           | 8.734  | 9.018           | 11.2                    |
| TARP   | xAgiQRj3qNUoqgRTgg  | rs12154478 | 6.28                         | 6.00                                  | 0.125                | 2.79                         | 16.57                         | 0.0825 | 8.733 | 0.499                             | 7.461   | 8.435           | 8.734  | 9.018           | 11.2                    |
| TAS2R5 | 3pSVfdTRdQh81143RQ  | rs917197   | 7.44                         | 7.10                                  | -0.15                | 3.38                         | -22.05                        | 0.4774 | 7.261 | 0.095                             | 7.117   | 7.189           | 7.247  | 7.298           | 7.667                   |
| TAS2R5 | 3pSVfdTRdQh81143RQ  | rs2234002  | 7.4                          | 7.07                                  | 0.148                | 3.76                         | -11.22                        | 0.4925 | 7.261 | 0.095                             | 7.117   | 7.189           | 7.247  | 7.298           | 7.667                   |
| TAS2R5 | 3pSVfdTRdQh81143RQ  | rs2190245  | 7.48                         | 7.14                                  | -0.15                | 3.38                         | -5.92                         | 0.4775 | 7.261 | 0.095                             | 7.117   | 7.189           | 7.247  | 7.298           | 7.667                   |
| TAS2R5 | 3pSVfdTRdQh81143RQ  | rs11773137 | 7.4                          | 7.07                                  | -0.148               | 3.76                         | -3.7                          | 0.4925 | 7.261 | 0.095                             | 7.117   | 7.189           | 7.247  | 7.298           | 7.667                   |
| TAS2R5 | 3pSVfdTRdQh81143RQ  | rs12669721 | 7.79                         | 7.44                                  | 0.156                | 3.38                         | 46.57                         | 0.475  | 7.261 | 0.095                             | 7.117   | 7.189           | 7.247  | 7.298           | 7.667                   |

| Symbol   | Lumi nuID           | SNP        | Population-based             | Population-based                      | % Variance Explained | Family-based                 | Distance from transcript (kb) | MAF    | Mean  | Transcript abundance (log2 scale) |         |                 |        |                 | SNP mapping under probe |         |
|----------|---------------------|------------|------------------------------|---------------------------------------|----------------------|------------------------------|-------------------------------|--------|-------|-----------------------------------|---------|-----------------|--------|-----------------|-------------------------|---------|
|          |                     |            | association p-value (-log10) | association p-value (-log10), GC adj. |                      | association p-value (-log10) |                               |        |       | Standard Deviation                | Minimum | 25th percentile | Median | 75th percentile |                         | Maximum |
| TAS2R5   | 3pSVfdTRdQh81143RQ  | rs11765575 | 4.01                         | 3.84                                  | -0.076               | 1.44                         | 46.8                          | 0.28   | 7.261 | 0.095                             | 7.117   | 7.189           | 7.247  | 7.298           | 7.667                   |         |
| TBC1D1   | caUj.RiifEueUUuXASs | rs10517469 | 4.33                         | 4.14                                  | -0.085               | 1.32                         | -43.32                        | 0.1325 | 7.421 | 0.146                             | 7.125   | 7.312           | 7.397  | 7.523           | 7.985                   |         |
| TBC1D7   | ZSGY24kKU_H7pEBHuo  | rs202054   | 3.32                         | 3.18                                  | -0.063               | 1.94                         | -31.86                        | 0.355  | 8.226 | 0.248                             | 7.126   | 8.099           | 8.179  | 8.34            | 9.283                   |         |
| TBC1D7   | ZSGY24kKU_H7pEBHuo  | rs412787   | 3.5                          | 3.35                                  | 0.066                | 1.96                         | -24.69                        | 0.3675 | 8.226 | 0.248                             | 7.126   | 8.099           | 8.179  | 8.34            | 9.283                   |         |
| TBCD     | 3E_dFxlhtupmjuehis  | rs9892064  | 4.71                         | 4.51                                  | -0.092               | 2.27                         | -73.16                        | 0.4325 | 9.988 | 0.585                             | 8.798   | 9.571           | 9.968  | 10.376          | 11.718                  |         |
| TBCD     | 3E_dFxlhtupmjuehis  | rs2292971  | 5.49                         | 5.24                                  | -0.108               | 3.03                         | -37.2                         | 0.4425 | 9.988 | 0.585                             | 8.798   | 9.571           | 9.968  | 10.376          | 11.718                  |         |
| TBCD     | 3E_dFxlhtupmjuehis  | rs7215871  | 3.84                         | 3.68                                  | -0.074               | 0.36                         | 17.63                         | 0.3442 | 9.988 | 0.585                             | 8.798   | 9.571           | 9.968  | 10.376          | 11.718                  |         |
| TBKBP1   | cfcaYCXIFUQ4NRXnUc  | rs11870935 | 4.6                          | 4.40                                  | -0.092               | 2.9                          | -40.02                        | 0.4975 | 7.321 | 0.129                             | 7.126   | 7.224           | 7.299  | 7.387           | 7.882                   |         |
| TBKBP1   | cfcaYCXIFUQ4NRXnUc  | rs8078686  | 3.44                         | 3.30                                  | -0.067               | 2.85                         | -36.92                        | 0.4823 | 7.321 | 0.129                             | 7.126   | 7.224           | 7.299  | 7.387           | 7.882                   |         |
| TBKBP1   | cfcaYCXIFUQ4NRXnUc  | rs4794053  | 6.95                         | 6.64                                  | 0.141                | 4.51                         | -3.08                         | 0.41   | 7.321 | 0.129                             | 7.126   | 7.224           | 7.299  | 7.387           | 7.882                   |         |
| TBKBP1   | cfcaYCXIFUQ4NRXnUc  | rs9913503  | 6.86                         | 6.56                                  | 0.142                | 4.73                         | 3.7                           | 0.4082 | 7.321 | 0.129                             | 7.126   | 7.224           | 7.299  | 7.387           | 7.882                   |         |
| TBN      | c3oHeq3rSou7XSft6l  | rs16895221 | 4.42                         | 4.23                                  | 0.088                | 1.44                         | -2.45                         | 0.115  | 7.521 | 0.157                             | 7.185   | 7.411           | 7.509  | 7.635           | 7.952                   |         |
| TBXA2R   | Q.Q3ei.uT6i0Vokhio  | rs2158935  | 3.42                         | 3.27                                  | 0.069                | 2.03                         | 5.31                          | 0.445  | 7.206 | 0.088                             | 7.11    | 7.15            | 7.18   | 7.225           | 7.628                   | Yes     |
| TBXA2R   | 3qSe1ZFGiCledNx_Zs  | rs2158935  | 3.35                         | 3.21                                  | 0.067                | 0.42                         | 5.31                          | 0.445  | 7.111 | 0.018                             | 7.09    | 7.103           | 7.107  | 7.114           | 7.293                   |         |
| TBXA2R   | Q.Q3ei.uT6i0Vokhio  | rs4807492  | 3.88                         | 3.72                                  | 0.078                | 2.05                         | 15.88                         | 0.395  | 7.206 | 0.088                             | 7.11    | 7.15            | 7.18   | 7.225           | 7.628                   | Yes     |
| TBXA2R   | Q.Q3ei.uT6i0Vokhio  | rs2271875  | 4.86                         | 4.65                                  | 0.1                  | 2.48                         | 20.26                         | 0.375  | 7.206 | 0.088                             | 7.11    | 7.15            | 7.18   | 7.225           | 7.628                   | Yes     |
| TBXA2R   | 3qSe1ZFGiCledNx_Zs  | rs2271875  | 3.55                         | 3.40                                  | 0.07                 | 0.23                         | 20.26                         | 0.375  | 7.111 | 0.018                             | 7.09    | 7.103           | 7.107  | 7.114           | 7.293                   |         |
| TBXA2R   | Q.Q3ei.uT6i0Vokhio  | rs4807493  | 3.71                         | 3.55                                  | -0.073               | 2.68                         | 24.38                         | 0.22   | 7.206 | 0.088                             | 7.11    | 7.15            | 7.18   | 7.225           | 7.628                   | Yes     |
| TCF7     | ZLUKSIKKUJQU0UJV0   | rs244689   | 3.36                         | 3.22                                  | 0.062                | 1.56                         | -28.5                         | 0.145  | 8.871 | 0.569                             | 7.177   | 8.516           | 8.827  | 9.212           | 10.956                  |         |
| TCFL5    | 0VX7Th3i0bnns_Qbko  | rs2294996  | 5.53                         | 5.29                                  | -0.104               | 2.57                         | -4.33                         | 0.2875 | 8.986 | 0.237                             | 8.242   | 8.818           | 8.975  | 9.139           | 9.765                   |         |
| TCFL5    | 0VX7Th3i0bnns_Qbko  | rs6010770  | 6.54                         | 6.25                                  | 0.124                | 1.43                         | 1.11                          | 0.0975 | 8.986 | 0.237                             | 8.242   | 8.818           | 8.975  | 9.139           | 9.765                   |         |
| TCOF1    | ECCBU1dUeFSnleCtc   | rs15251    | 3.32                         | 3.18                                  | 0.067                | 1.06                         | -3.64                         | 0.2575 | 7.143 | 0.059                             | 7.097   | 7.113           | 7.126  | 7.15            | 7.579                   |         |
| TCTEX1D2 | 9lrgos9On3Z796jnhE  | rs4916425  | 4.11                         | 3.93                                  | -0.08                | 1.06                         | 6.62                          | 0.3325 | 9.563 | 0.265                             | 8.682   | 9.385           | 9.596  | 9.737           | 10.233                  |         |
| TDRKH    | mSV6B65xSL1sqBfx0   | rs6696250  | 11.84                        | 11.29                                 | 0.231                | 6.52                         | -48.77                        | 0.4825 | 7.526 | 0.191                             | 7.152   | 7.396           | 7.511  | 7.659           | 8.276                   |         |
| TDRKH    | mSV6B65xSL1sqBfx0   | rs12758387 | 12.8                         | 12.21                                 | -0.253               | 5.19                         | -36.84                        | 0.4673 | 7.526 | 0.191                             | 7.152   | 7.396           | 7.511  | 7.659           | 8.276                   |         |
| TDRKH    | mSV6B65xSL1sqBfx0   | rs2017850  | 9.15                         | 8.73                                  | 0.185                | 4.07                         | -28.76                        | 0.3618 | 7.526 | 0.191                             | 7.152   | 7.396           | 7.511  | 7.659           | 8.276                   |         |
| TDRKH    | mSV6B65xSL1sqBfx0   | rs8480     | 12.28                        | 11.71                                 | -0.241               | 5.06                         | -10.7                         | 0.4675 | 7.526 | 0.191                             | 7.152   | 7.396           | 7.511  | 7.659           | 8.276                   |         |
| TDRKH    | mSV6B65xSL1sqBfx0   | rs7007     | 5.21                         | 4.98                                  | -0.102               | 2.26                         | -8.46                         | 0.17   | 7.526 | 0.191                             | 7.152   | 7.396           | 7.511  | 7.659           | 8.276                   |         |
| TDRKH    | mSV6B65xSL1sqBfx0   | rs12066445 | 4.67                         | 4.47                                  | -0.091               | 1.77                         | -3.62                         | 0.305  | 7.526 | 0.191                             | 7.152   | 7.396           | 7.511  | 7.659           | 8.276                   |         |
| TDRKH    | mSV6B65xSL1sqBfx0   | rs1123855  | 18.82                        | 17.93                                 | -0.352               | 6.29                         | 3                             | 0.485  | 7.526 | 0.191                             | 7.152   | 7.396           | 7.511  | 7.659           | 8.276                   |         |
| TDRKH    | mSV6B65xSL1sqBfx0   | rs1781421  | 18.82                        | 17.93                                 | -0.352               | 6.29                         | 3.69                          | 0.485  | 7.526 | 0.191                             | 7.152   | 7.396           | 7.511  | 7.659           | 8.276                   |         |
| TDRKH    | mSV6B65xSL1sqBfx0   | rs4845579  | 5.17                         | 4.94                                  | 0.101                | 2.16                         | 7.14                          | 0.1775 | 7.526 | 0.191                             | 7.152   | 7.396           | 7.511  | 7.659           | 8.276                   |         |
| TDRKH    | mSV6B65xSL1sqBfx0   | rs9826     | 4.93                         | 4.71                                  | -0.099               | 1.67                         | 15.9                          | 0.3056 | 7.526 | 0.191                             | 7.152   | 7.396           | 7.511  | 7.659           | 8.276                   |         |
| TDRKH    | mSV6B65xSL1sqBfx0   | rs3828057  | 7.39                         | 7.06                                  | -0.148               | 2.56                         | 17.18                         | 0.47   | 7.526 | 0.191                             | 7.152   | 7.396           | 7.511  | 7.659           | 8.276                   |         |
| TDRKH    | mSV6B65xSL1sqBfx0   | rs7540530  | 3.92                         | 3.75                                  | 0.075                | 2.2                          | 27.86                         | 0.485  | 7.526 | 0.191                             | 7.152   | 7.396           | 7.511  | 7.659           | 8.276                   |         |
| TEF      | QjuMi7uqd7tfv6iek8  | rs5751080  | 4.68                         | 4.48                                  | 0.089                | 1.07                         | -41.7                         | 0.275  | 8.266 | 0.357                             | 7.473   | 8.001           | 8.243  | 8.529           | 9.32                    |         |
| TEF      | QjuMi7uqd7tfv6iek8  | rs5758314  | 4.81                         | 4.60                                  | -0.092               | 1.58                         | -15.44                        | 0.2675 | 8.266 | 0.357                             | 7.473   | 8.001           | 8.243  | 8.529           | 9.32                    |         |
| TEF      | QjuMi7uqd7tfv6iek8  | rs132902   | 5.77                         | 5.51                                  | 0.112                | 1.77                         | 2.43                          | 0.225  | 8.266 | 0.357                             | 7.473   | 8.001           | 8.243  | 8.529           | 9.32                    |         |
| TEF      | QjuMi7uqd7tfv6iek8  | rs132905   | 5.68                         | 5.43                                  | 0.111                | 1.64                         | 3.78                          | 0.2325 | 8.266 | 0.357                             | 7.473   | 8.001           | 8.243  | 8.529           | 9.32                    |         |
| TEF      | QjuMi7uqd7tfv6iek8  | rs202654   | 5.25                         | 5.02                                  | 0.102                | 1.59                         | 45.7                          | 0.2211 | 8.266 | 0.357                             | 7.473   | 8.001           | 8.243  | 8.529           | 9.32                    |         |
| TEPP     | lehZxoSCVeX9h1eBH8  | rs152141   | 6.19                         | 5.91                                  | -0.122               | 2.74                         | -27.3                         | 0.18   | 7.342 | 0.141                             | 7.118   | 7.225           | 7.329  | 7.438           | 7.827                   |         |
| TEPP     | lehZxoSCVeX9h1eBH8  | rs17821448 | 5.62                         | 5.38                                  | -0.108               | 1.06                         | -13.41                        | 0.4975 | 7.342 | 0.141                             | 7.118   | 7.225           | 7.329  | 7.438           | 7.827                   |         |
| TEPP     | lehZxoSCVeX9h1eBH8  | rs12929493 | 6                            | 5.74                                  | -0.117               | 0.86                         | -10.82                        | 0.4648 | 7.342 | 0.141                             | 7.118   | 7.225           | 7.329  | 7.438           | 7.827                   |         |
| TEPP     | lehZxoSCVeX9h1eBH8  | rs11644617 | 8.68                         | 8.28                                  | -0.17                | 2.96                         | -9.62                         | 0.17   | 7.342 | 0.141                             | 7.118   | 7.225           | 7.329  | 7.438           | 7.827                   |         |
| TEPP     | lehZxoSCVeX9h1eBH8  | rs2405130  | 6.17                         | 5.90                                  | -0.121               | 0.39                         | -8.41                         | 0.33   | 7.342 | 0.141                             | 7.118   | 7.225           | 7.329  | 7.438           | 7.827                   |         |
| TEPP     | lehZxoSCVeX9h1eBH8  | rs9934227  | 8.86                         | 8.46                                  | -0.174               | 3.59                         | -1.96                         | 0.1633 | 7.342 | 0.141                             | 7.118   | 7.225           | 7.329  | 7.438           | 7.827                   |         |
| TEPP     | lehZxoSCVeX9h1eBH8  | rs2405128  | 8.53                         | 8.14                                  | -0.167               | 3.16                         | -1.19                         | 0.1633 | 7.342 | 0.141                             | 7.118   | 7.225           | 7.329  | 7.438           | 7.827                   |         |
| TEPP     | lehZxoSCVeX9h1eBH8  | rs8055820  | 9.47                         | 9.04                                  | -0.185               | 3.9                          | 2.99                          | 0.34   | 7.342 | 0.141                             | 7.118   | 7.225           | 7.329  | 7.438           | 7.827                   |         |
| TEPP     | lehZxoSCVeX9h1eBH8  | rs9083     | 5.86                         | 5.61                                  | -0.115               | 1.84                         | 7.51                          | 0.4372 | 7.342 | 0.141                             | 7.118   | 7.225           | 7.329  | 7.438           | 7.827                   |         |
| TEPP     | lehZxoSCVeX9h1eBH8  | rs1428814  | 8.77                         | 8.38                                  | -0.17                | 3.25                         | 28.22                         | 0.2475 | 7.342 | 0.141                             | 7.118   | 7.225           | 7.329  | 7.438           | 7.827                   |         |
| TEPP     | lehZxoSCVeX9h1eBH8  | rs11648508 | 7.05                         | 6.74                                  | 0.136                | 3.13                         | 42.16                         | 0.31   | 7.342 | 0.141                             | 7.118   | 7.225           | 7.329  | 7.438           | 7.827                   |         |
| TEPP     | lehZxoSCVeX9h1eBH8  | rs4784887  | 5.29                         | 5.06                                  | -0.1                 | 3.32                         | 44.27                         | 0.285  | 7.342 | 0.141                             | 7.118   | 7.225           | 7.329  | 7.438           | 7.827                   |         |
| TFCP2    | i4K3kIF4dt4e7uii1   | rs3759406  | 6.6                          | 6.31                                  | -0.132               | 3.46                         | -46.87                        | 0.165  | 9.302 | 0.215                             | 8.636   | 9.173           | 9.322  | 9.442           | 9.735                   |         |
| TFCP2    | i4K3kIF4dt4e7uii1   | rs6580783  | 4.57                         | 4.37                                  | -0.091               | 0.17                         | -44.9                         | 0.0812 | 9.302 | 0.215                             | 8.636   | 9.173           | 9.322  | 9.442           | 9.735                   |         |
| TFCP2    | i4K3kIF4dt4e7uii1   | rs4768959  | 4.32                         | 4.13                                  | 0.084                | 0                            | -42.96                        | 0.0825 | 9.302 | 0.215                             | 8.636   | 9.173           | 9.322  | 9.442           | 9.735                   |         |
| TFCP2    | i4K3kIF4dt4e7uii1   | rs10099    | 3.54                         | 3.39                                  | 0.068                | 0.79                         | -0.74                         | 0.235  | 9.302 | 0.215                             | 8.636   | 9.173           | 9.322  | 9.442           | 9.735                   |         |
| TFCP2    | i4K3kIF4dt4e7uii1   | rs2359189  | 4.79                         | 4.58                                  | -0.095               | 0.85                         | 3.89                          | 0.1075 | 9.302 | 0.215                             | 8.636   | 9.173           | 9.322  | 9.442           | 9.735                   |         |
| TGFB11   | uSAaVJSFwFRGVEC6Pk  | rs11643752 | 3.61                         | 3.46                                  | 0.07                 | 2.55                         | -32.83                        | 0.4275 | 7.19  | 0.083                             | 7.107   | 7.14            | 7.164  | 7.211           | 7.728                   |         |
| TGFB11   | uSAaVJSFwFRGVEC6Pk  | rs11150624 | 4.5                          | 4.31                                  | -0.089               | 2.9                          | -8.07                         | 0.45   | 7.19  | 0.083                             | 7.107   | 7.14            | 7.164  | 7.211           | 7.728                   |         |
| TGFB11   | uSAaVJSFwFRGVEC6Pk  | rs11646911 | 4.5                          | 4.31                                  | -0.089               | 2.69                         | -0.91                         | 0.45   | 7.19  | 0.083                             | 7.107   | 7.14            | 7.164  | 7.211           | 7.728                   |         |
| TGFB11   | uSAaVJSFwFRGVEC6Pk  | rs9934336  | 3.59                         | 3.44                                  | -0.067               | 2                            | 6.59                          | 0.2663 | 7.19  | 0.083                             | 7.107   | 7.14            | 7.164  | 7.211           | 7.728                   |         |
| TGFB3    | ot9VR9V1CFe70.rvXo  | rs8011635  | 3.96                         | 3.79                                  | -0.071               | 1.39                         | 17.34                         | 0.3518 | 7.593 | 0.229                             | 7.182   | 7.426           | 7.573  | 7.712           | 9.019                   |         |



| Symbol  | Lumi nuID           | SNP        | Population-based | Population-based          | % Variance | Family-based     | Distance from   | MAF    | Mean      | Transcript abundance (log2 scale) |            |            |            |         | SNP mapping under probe |     |
|---------|---------------------|------------|------------------|---------------------------|------------|------------------|-----------------|--------|-----------|-----------------------------------|------------|------------|------------|---------|-------------------------|-----|
|         |                     |            | association      | association               |            | association      |                 |        |           | Standard                          | 25th       | Median     | 75th       | Maximum |                         |     |
|         |                     |            | p-value (-log10) | p-value (-log10), GC adj. | Explained  | p-value (-log10) | transcript (kb) |        | Deviation | Minimum                           | percentile | percentile | percentile | Maximum |                         |     |
| TGFBFR1 | iE58qu6i9T6pOOhe3E  | rs10819634 | 4.03             | 3.86                      | -0.079     | 2.16             | -7.34           | 0.1725 | 7.486     | 0.13                              | 7.185      | 7.404      | 7.473      | 7.558   | 8.308                   | Yes |
| TGFBFR1 | iE58qu6i9T6pOOhe3E  | rs2026811  | 4.19             | 4.01                      | 0.081      | 2.18             | 11.85           | 0.1975 | 7.486     | 0.13                              | 7.185      | 7.404      | 7.473      | 7.558   | 8.308                   | Yes |
| TGFBFR1 | iE58qu6i9T6pOOhe3E  | rs1571590  | 3.46             | 3.32                      | -0.066     | 2.33             | 16.4            | 0.185  | 7.486     | 0.13                              | 7.185      | 7.404      | 7.473      | 7.558   | 8.308                   | Yes |
| TGFBFR1 | iE58qu6i9T6pOOhe3E  | rs401186   | 4.19             | 4.01                      | -0.081     | 2.12             | 8.6             | 0.1975 | 7.486     | 0.13                              | 7.185      | 7.404      | 7.473      | 7.558   | 8.308                   | Yes |
| TGM2    | 3ded.cTh6l1fqqeg_o  | rs6023527  | 4.97             | 4.75                      | -0.101     | 1.64             | -10.1           | 0.135  | 7.261     | 0.118                             | 7.119      | 7.187      | 7.237      | 7.296   | 8.089                   |     |
| THEM4   | xhQpT3XgLnKgonrRl0  | rs6587625  | 3.3              | 3.16                      | -0.06      | 3.23             | -25.74          | 0.1725 | 8.168     | 0.451                             | 7.137      | 7.833      | 8.227      | 8.473   | 9.511                   |     |
| THEM4   | xhQpT3XgLnKgonrRl0  | rs4845624  | 4.19             | 4.01                      | -0.078     | 2.32             | -18.25          | 0.2725 | 8.168     | 0.451                             | 7.137      | 7.833      | 8.227      | 8.473   | 9.511                   |     |
| THEM4   | xhQpT3XgLnKgonrRl0  | rs13320    | 9.46             | 9.03                      | 0.18       | 3.45             | 0.46            | 0.3775 | 8.168     | 0.451                             | 7.137      | 7.833      | 8.227      | 8.473   | 9.511                   |     |
| THEM4   | xhQpT3XgLnKgonrRl0  | rs10788819 | 3.93             | 3.76                      | 0.074      | 2.33             | 12.98           | 0.23   | 8.168     | 0.451                             | 7.137      | 7.833      | 8.227      | 8.473   | 9.511                   |     |
| THEM4   | xhQpT3XgLnKgonrRl0  | rs3007711  | 7.65             | 7.31                      | 0.15       | 3.43             | 15.26           | 0.3625 | 8.168     | 0.451                             | 7.137      | 7.833      | 8.227      | 8.473   | 9.511                   |     |
| THEM4   | xhQpT3XgLnKgonrRl0  | rs3007685  | 7.65             | 7.31                      | -0.15      | 3.43             | 15.92           | 0.3625 | 8.168     | 0.451                             | 7.137      | 7.833      | 8.227      | 8.473   | 9.511                   |     |
| THEM4   | xhQpT3XgLnKgonrRl0  | rs10494270 | 5.22             | 4.99                      | -0.1       | 3.39             | 25.06           | 0.285  | 8.168     | 0.451                             | 7.137      | 7.833      | 8.227      | 8.473   | 9.511                   |     |
| THRA    | xF56b2JHG0FFkBEE9Y  | rs3744805  | 3.54             | 3.39                      | 0.069      | 0.99             | 2.06            | 0.1327 | 7.729     | 0.26                              | 7.12       | 7.564      | 7.701      | 7.844   | 8.835                   |     |
| TIFA    | 0q.Eli0Vp_D58S7st0  | rs4834244  | 7.08             | 6.76                      | 0.137      | 1.66             | -46.22          | 0.49   | 7.748     | 0.168                             | 7.134      | 7.649      | 7.751      | 7.849   | 8.159                   |     |
| TIFA    | 0q.Eli0Vp_D58S7st0  | rs10026870 | 4.22             | 4.03                      | 0.08       | 1.42             | -22.08          | 0.295  | 7.748     | 0.168                             | 7.134      | 7.649      | 7.751      | 7.849   | 8.159                   |     |
| TIFA    | 0q.Eli0Vp_D58S7st0  | rs6836717  | 7.14             | 6.82                      | -0.138     | 1.7              | -2.11           | 0.4925 | 7.748     | 0.168                             | 7.134      | 7.649      | 7.751      | 7.849   | 8.159                   |     |
| TIFA    | 0q.Eli0Vp_D58S7st0  | rs6533603  | 3.34             | 3.20                      | -0.062     | 0.34             | 13.74           | 0.4975 | 7.748     | 0.168                             | 7.134      | 7.649      | 7.751      | 7.849   | 8.159                   |     |
| TIFA    | 0q.Eli0Vp_D58S7st0  | rs7658770  | 4.73             | 4.50                      | -0.092     | 1.64             | 33.08           | 0.3225 | 7.748     | 0.168                             | 7.134      | 7.649      | 7.751      | 7.849   | 8.159                   |     |
| TIFA    | 0q.Eli0Vp_D58S7st0  | rs6810537  | 5.19             | 4.96                      | 0.103      | 1.95             | 36.21           | 0.3467 | 7.748     | 0.168                             | 7.134      | 7.649      | 7.751      | 7.849   | 8.159                   |     |
| TIFA    | 0q.Eli0Vp_D58S7st0  | rs1544383  | 4.95             | 4.73                      | -0.097     | 2.05             | 37.41           | 0.3425 | 7.748     | 0.168                             | 7.134      | 7.649      | 7.751      | 7.849   | 8.159                   |     |
| TIFA    | 0q.Eli0Vp_D58S7st0  | rs4834259  | 5.75             | 5.50                      | -0.113     | 2.19             | 37.92           | 0.335  | 7.748     | 0.168                             | 7.134      | 7.649      | 7.751      | 7.849   | 8.159                   |     |
| TIGD2   | 9uvYd2iS4dCe0rnh4Q  | rs8180333  | 4.53             | 4.33                      | 0.084      | 0.85             | -48.48          | 0.11   | 7.945     | 0.162                             | 7.553      | 7.831      | 7.937      | 8.056   | 8.397                   |     |
| TIGD2   | 9uvYd2iS4dCe0rnh4Q  | rs938265   | 4.53             | 4.33                      | -0.084     | 0.85             | -40.3           | 0.11   | 7.945     | 0.162                             | 7.553      | 7.831      | 7.937      | 8.056   | 8.397                   |     |
| TIGD2   | 9uvYd2iS4dCe0rnh4Q  | rs7657630  | 4.53             | 4.33                      | 0.084      | 0.85             | -6.55           | 0.11   | 7.945     | 0.162                             | 7.553      | 7.831      | 7.937      | 8.056   | 8.397                   |     |
| TIMM10  | T1aLrJnt164KLP7RHo  | rs2955849  | 4.76             | 4.55                      | -0.096     | 1.46             | -46.81          | 0.4025 | 9.355     | 0.53                              | 7.568      | 9.117      | 9.475      | 9.72    | 10.497                  |     |
| TIMM10  | T1aLrJnt164KLP7RHo  | rs2729384  | 26.61            | 25.35                     | -0.461     | 4.94             | -37.32          | 0.2225 | 9.355     | 0.53                              | 7.568      | 9.117      | 9.475      | 9.72    | 10.497                  |     |
| TIMM10  | T1aLrJnt164KLP7RHo  | rs2729385  | 3.64             | 3.49                      | -0.07      | 1.99             | -32.94          | 0.3175 | 9.355     | 0.53                              | 7.568      | 9.117      | 9.475      | 9.72    | 10.497                  |     |
| TIMM10  | T1aLrJnt164KLP7RHo  | rs4939148  | 4.76             | 4.55                      | 0.096      | 2.26             | -4.97           | 0.3593 | 9.355     | 0.53                              | 7.568      | 9.117      | 9.475      | 9.72    | 10.497                  |     |
| TIMM10  | T1aLrJnt164KLP7RHo  | rs514385   | 9.41             | 8.98                      | 0.189      | 3.56             | 7.8             | 0.4275 | 9.355     | 0.53                              | 7.568      | 9.117      | 9.475      | 9.72    | 10.497                  |     |
| TIMM10  | T1aLrJnt164KLP7RHo  | rs2729368  | 9.45             | 9.02                      | 0.192      | 3.65             | 17.43           | 0.4271 | 9.355     | 0.53                              | 7.568      | 9.117      | 9.475      | 9.72    | 10.497                  |     |
| TIMM10  | T1aLrJnt164KLP7RHo  | rs5847     | 15.49            | 14.77                     | -0.295     | 4.19             | 21.12           | 0.445  | 9.355     | 0.53                              | 7.568      | 9.117      | 9.475      | 9.72    | 10.497                  |     |
| TIMM10  | T1aLrJnt164KLP7RHo  | rs2848624  | 9.13             | 8.71                      | -0.185     | 3.26             | 29.23           | 0.415  | 9.355     | 0.53                              | 7.568      | 9.117      | 9.475      | 9.72    | 10.497                  |     |
| TIMM22  | f2eKp70UU1291KiCgs  | rs2663342  | 3.8              | 3.64                      | 0.074      | 2.89             | 5.89            | 0.465  | 10.032    | 0.326                             | 9.218      | 9.802      | 10.031     | 10.228  | 10.954                  |     |
| TIMM22  | f2eKp70UU1291KiCgs  | rs11247574 | 7.13             | 6.81                      | 0.143      | 2.87             | 18.51           | 0.2125 | 10.032    | 0.326                             | 9.218      | 9.802      | 10.031     | 10.228  | 10.954                  |     |
| TIMM22  | f2eKp70UU1291KiCgs  | rs12602332 | 3.29             | 3.15                      | -0.061     | 0.53             | 46.01           | 0.1225 | 10.032    | 0.326                             | 9.218      | 9.802      | 10.031     | 10.228  | 10.954                  |     |
| TIPRL   | WW0_dAdzLs_eiUMpKs  | rs12742613 | 8.6              | 8.21                      | 0.177      | 4.49             | -21.88          | 0.2337 | 8.373     | 0.436                             | 7.174      | 8.08       | 8.411      | 8.686   | 9.374                   |     |
| TIPRL   | WW0_dAdzLs_eiUMpKs  | rs4657739  | 10.35            | 9.87                      | 0.209      | 4.4              | -5.68           | 0.24   | 8.373     | 0.436                             | 7.174      | 8.08       | 8.411      | 8.686   | 9.374                   |     |
| TIPRL   | WW0_dAdzLs_eiUMpKs  | rs1320993  | 11.72            | 11.18                     | -0.234     | 3.99             | 6.43            | 0.25   | 8.373     | 0.436                             | 7.174      | 8.08       | 8.411      | 8.686   | 9.374                   |     |
| TIPRL   | WW0_dAdzLs_eiUMpKs  | rs2294253  | 12.28            | 11.72                     | 0.246      | 4.61             | 8.46            | 0.345  | 8.373     | 0.436                             | 7.174      | 8.08       | 8.411      | 8.686   | 9.374                   |     |
| TIPRL   | lIpe54luklCSHoq4Ec  | rs2294253  | 3.77             | 3.61                      | -0.069     | 1.57             | -5.01           | 0.345  | 8.944     | 0.292                             | 7.937      | 8.785      | 8.977      | 9.161   | 9.538                   |     |
| TIPRL   | WW0_dAdzLs_eiUMpKs  | rs2235207  | 14.82            | 14.13                     | 0.291      | 5.48             | 11.09           | 0.38   | 8.373     | 0.436                             | 7.174      | 8.08       | 8.411      | 8.686   | 9.374                   |     |
| TIPRL   | lIpe54luklCSHoq4Ec  | rs2235207  | 5.7              | 5.45                      | -0.108     | 2.13             | -2.37           | 0.38   | 8.944     | 0.292                             | 7.937      | 8.785      | 8.977      | 9.161   | 9.538                   |     |
| TIPRL   | WW0_dAdzLs_eiUMpKs  | rs1040404  | 14.82            | 14.13                     | -0.291     | 5.48             | -11.46          | 0.38   | 8.373     | 0.436                             | 7.174      | 8.08       | 8.411      | 8.686   | 9.374                   |     |
| TIPRL   | lIpe54luklCSHoq4Ec  | rs1040404  | 5.7              | 5.45                      | 0.108      | 2.13             | -1.74           | 0.38   | 8.944     | 0.292                             | 7.937      | 8.785      | 8.977      | 9.161   | 9.538                   |     |
| TJAP1   | iI6VUDUF_nch7x3wn8  | rs1214748  | 3.55             | 3.40                      | -0.068     | 1.61             | -26.62          | 0.275  | 10.645    | 0.282                             | 9.577      | 10.457     | 10.666     | 10.854  | 11.416                  |     |
| TJAP1   | iI6VUDUF_nch7x3wn8  | rs1674850  | 3.39             | 3.24                      | -0.065     | 1                | -17.46          | 0.27   | 10.645    | 0.282                             | 9.577      | 10.457     | 10.666     | 10.854  | 11.416                  |     |
| TM2D1   | Zfo6_okjYxfXn_o     | rs4915769  | 3.8              | 3.64                      | 0.071      | 0.9              | -39.16          | 0.1075 | 9.059     | 0.302                             | 8.095      | 8.88       | 9.11       | 9.286   | 9.59                    |     |
| TM2D3   | xwKNaiQRkT0Sy9UqSQ  | rs2053701  | 3.72             | 3.56                      | 0.072      | 2.57             | 12.82           | 0.2925 | 7.622     | 0.223                             | 7.116      | 7.483      | 7.584      | 7.724   | 8.31                    |     |
| TM7SF3  | WVfgELd0XiXtwH9oql  | rs1098528  | 3.36             | 3.22                      | 0.064      | 0.95             | -27.92          | 0.3825 | 9.29      | 0.267                             | 8.401      | 9.13       | 9.266      | 9.454   | 10.025                  |     |
| TM7SF3  | WVfgELd0XiXtwH9oql  | rs6487582  | 5.42             | 5.18                      | 0.118      | 1.23             | -10.73          | 0.1457 | 9.29      | 0.267                             | 8.401      | 9.13       | 9.266      | 9.454   | 10.025                  |     |
| TM7SF3  | WVfgELd0XiXtwH9oql  | rs15556    | 3.34             | 3.20                      | 0.065      | 2                | -1.47           | 0.2045 | 9.29      | 0.267                             | 8.401      | 9.13       | 9.266      | 9.454   | 10.025                  |     |
| TMBIM4  | NovrJZ5KJX3.e6PTQ   | rs1168765  | 3.41             | 3.26                      | 0.065      | 2                | -18.08          | 0.415  | 12.184    | 0.217                             | 11.416     | 12.065     | 12.218     | 12.336  | 12.611                  |     |
| TMBIM4  | NovrJZ5KJX3.e6PTQ   | rs11176060 | 3.76             | 3.60                      | -0.075     | 2.24             | 10.11           | 0.4086 | 12.184    | 0.217                             | 11.416     | 12.065     | 12.218     | 12.336  | 12.611                  |     |
| TMBIM4  | NovrJZ5KJX3.e6PTQ   | rs8793     | 3.6              | 3.45                      | 0.07       | 1.96             | 14.91           | 0.4025 | 12.184    | 0.217                             | 11.416     | 12.065     | 12.218     | 12.336  | 12.611                  |     |
| TMC4    | 3kIRtWf0hVVKPsJcrQ  | rs641738   | 3.51             | 3.36                      | -0.069     | 0.69             | -0.09           | 0.3985 | 7.203     | 0.094                             | 7.108      | 7.145      | 7.176      | 7.225   | 7.987                   |     |
| TMC8    | B3S6dSpdXSK1UCOHeEQ | rs2871647  | 17.82            | 16.99                     | -0.337     | 5.46             | 0.04            | 0.145  | 9.27      | 0.395                             | 8.182      | 8.964      | 9.254      | 9.539   | 10.664                  |     |
| TMC8    | B3S6dSpdXSK1UCOHeEQ | rs11656744 | 12.82            | 12.23                     | -0.252     | 4.95             | 6               | 0.1925 | 9.27      | 0.395                             | 8.182      | 8.964      | 9.254      | 9.539   | 10.664                  |     |
| TMCC1   | ZRKQDzr1RFQFUDgF6g  | rs10804591 | 3.96             | 3.79                      | 0.076      | 3.16             | -32.4           | 0.1975 | 7.325     | 0.215                             | 7.109      | 7.153      | 7.241      | 7.468   | 7.976                   | Yes |
| TMCC1   | ZRKQDzr1RFQFUDgF6g  | rs1136553  | 14.66            | 13.98                     | 0.284      | 6.4              | 0.33            | 0.095  | 7.325     | 0.215                             | 7.109      | 7.153      | 7.241      | 7.468   | 7.976                   | Yes |
| TMCC1   | ZRKQDzr1RFQFUDgF6g  | rs2811425  | 6.24             | 5.97                      | 0.124      | 3.59             | 7.96            | 0.1575 | 7.325     | 0.215                             | 7.109      | 7.153      | 7.241      | 7.468   | 7.976                   | Yes |
| TMCC1   | ZRKQDzr1RFQFUDgF6g  | rs4688772  | 11.56            | 11.03                     | 0.228      | 5.57             | 25.27           | 0.11   | 7.325     | 0.215                             | 7.109      | 7.153      | 7.241      | 7.468   | 7.976                   | Yes |
| TMCC3   | QqQFQl6Aufvq6sJFF4  | rs7955502  | 3.92             | 3.75                      | -0.076     | 1.97             | -12.04          | 0.1525 | 7.173     | 0.102                             | 7.102      | 7.126      | 7.149      | 7.174   | 8.11                    |     |

| Symbol   | Lumi nuID          | SNP        | Population-based             | Population-based                      | % Variance Explained | Family-based                 | Distance from transcript (kb) | MAF    | Mean   | Transcript abundance (log2 scale) |         |                 |        |                 | SNP mapping under probe |         |
|----------|--------------------|------------|------------------------------|---------------------------------------|----------------------|------------------------------|-------------------------------|--------|--------|-----------------------------------|---------|-----------------|--------|-----------------|-------------------------|---------|
|          |                    |            | association p-value (-log10) | association p-value (-log10), GC adj. |                      | association p-value (-log10) |                               |        |        | Standard Deviation                | Minimum | 25th percentile | Median | 75th percentile |                         | Maximum |
| TMED5    | 9pUFJ9TDskvFu9FORw | rs2391228  | 3.36                         | 3.22                                  | 0.064                | 0.48                         | -10.47                        | 0.2425 | 10.597 | 0.455                             | 8.655   | 10.406          | 10.701 | 10.921          | 11.308                  |         |
| TMED6    | 3euthJUjX7zz396jXk | rs153060   | 5.79                         | 5.54                                  | -0.105               | 4.96                         | 0.39                          | 0.35   | 7.201  | 0.148                             | 7.097   | 7.121           | 7.149  | 7.216           | 8.492                   |         |
| TMED6    | 3euthJUjX7zz396jXk | rs251796   | 4.48                         | 4.29                                  | -0.08                | 4.21                         | 9.74                          | 0.33   | 7.201  | 0.148                             | 7.097   | 7.121           | 7.149  | 7.216           | 8.492                   |         |
| TMED9    | uFReUV6gXR73d.SXIU | rs337365   | 4.97                         | 4.75                                  | 0.094                | 1.77                         | -15.6                         | 0.49   | 10.927 | 0.306                             | 8.99    | 10.741          | 10.976 | 11.121          | 11.608                  |         |
| TMED9    | uFReUV6gXR73d.SXIU | rs13169820 | 3.79                         | 3.63                                  | -0.07                | 0.58                         | 18.66                         | 0.3475 | 10.927 | 0.306                             | 8.99    | 10.741          | 10.976 | 11.121          | 11.608                  |         |
| TMEM110  | rhRYukK6CgkSkRIW6s | rs17331151 | 5.56                         | 5.32                                  | 0.111                | 0.69                         | -29.36                        | 0.1055 | 7.319  | 0.107                             | 7.128   | 7.238           | 7.304  | 7.388           | 7.747                   |         |
| TMEM110  | rhRYukK6CgkSkRIW6s | rs11626    | 5.08                         | 4.85                                  | 0.099                | 0.69                         | 0.09                          | 0.165  | 7.319  | 0.107                             | 7.128   | 7.238           | 7.304  | 7.388           | 7.747                   |         |
| TMEM110  | rhRYukK6CgkSkRIW6s | rs11130329 | 6.17                         | 5.90                                  | 0.121                | 0.98                         | 22.96                         | 0.16   | 7.319  | 0.107                             | 7.128   | 7.238           | 7.304  | 7.388           | 7.747                   |         |
| TMEM110  | rhRYukK6CgkSkRIW6s | rs3796352  | 5.64                         | 5.39                                  | 0.11                 | 0.76                         | -18.27                        | 0.1    | 7.319  | 0.107                             | 7.128   | 7.238           | 7.304  | 7.388           | 7.747                   |         |
| TMEM110  | rhRYukK6CgkSkRIW6s | rs1986656  | 6.28                         | 6.00                                  | 0.123                | 1.08                         | -18.14                        | 0.1375 | 7.319  | 0.107                             | 7.128   | 7.238           | 7.304  | 7.388           | 7.747                   |         |
| TMEM110  | rhRYukK6CgkSkRIW6s | rs11922975 | 3.6                          | 3.45                                  | -0.067               | 0.92                         | 5.22                          | 0.38   | 7.319  | 0.107                             | 7.128   | 7.238           | 7.304  | 7.388           | 7.747                   |         |
| TMEM121  | 3miN519rpd6d.qIA   | rs10151805 | 10.54                        | 10.05                                 | 0.211                | 4.27                         | -18.17                        | 0.25   | 7.791  | 0.256                             | 7.212   | 7.604           | 7.761  | 7.946           | 8.597                   |         |
| TMEM121  | 3miN519rpd6d.qIA   | rs4074453  | 10.27                        | 9.80                                  | 0.206                | 3.83                         | 2                             | 0.2437 | 7.791  | 0.256                             | 7.212   | 7.604           | 7.761  | 7.946           | 8.597                   |         |
| TMEM136  | rU5_iCSmi4oGkngEQY | rs11605781 | 4.81                         | 4.60                                  | -0.097               | 1.34                         | -17.38                        | 0.4675 | 7.125  | 0.023                             | 7.095   | 7.11            | 7.12   | 7.133           | 7.26                    |         |
| TMEM136  | rU5_iCSmi4oGkngEQY | rs7102217  | 4.53                         | 4.33                                  | 0.088                | 1.29                         | -8.58                         | 0.385  | 7.125  | 0.023                             | 7.095   | 7.11            | 7.12   | 7.133           | 7.26                    |         |
| TMEM136  | rU5_iCSmi4oGkngEQY | rs11217837 | 3.63                         | 3.47                                  | 0.072                | 0.9                          | 31.42                         | 0.25   | 7.125  | 0.023                             | 7.095   | 7.11            | 7.12   | 7.133           | 7.26                    |         |
| TMEM149  | 3ZCM6ni55etRf5c9ng | rs8106959  | 8.95                         | 8.54                                  | -0.182               | 2.54                         | -10.63                        | 0.175  | 10.506 | 0.523                             | 8.589   | 10.162          | 10.506 | 10.908          | 11.684                  |         |
| TMEM149  | 3ZCM6ni55etRf5c9ng | rs2871921  | 12.78                        | 12.19                                 | -0.26                | 3.21                         | -0.93                         | 0.1533 | 10.506 | 0.523                             | 8.589   | 10.162          | 10.506 | 10.908          | 11.684                  |         |
| TMEM149  | 3ZCM6ni55etRf5c9ng | rs2291067  | 10.32                        | 9.84                                  | 0.206                | 2.75                         | 40.18                         | 0.1775 | 10.506 | 0.523                             | 8.589   | 10.162          | 10.506 | 10.908          | 11.684                  |         |
| TMEM149  | 3ZCM6ni55etRf5c9ng | rs501948   | 3.82                         | 3.64                                  | -0.075               | 1.16                         | 31.64                         | 0.2075 | 10.383 | 0.4                               | 7.911   | 10.235          | 10.49  | 10.616          | 11.082                  |         |
| TMEM156  | BYM1WpC_hYf4IMdII  | rs2711943  | 4.52                         | 4.33                                  | 0.079                | 2.54                         | 28.39                         | 0.2175 | 7.936  | 0.273                             | 7.143   | 7.757           | 7.941  | 8.09            | 8.929                   |         |
| TMEM156  | BYM1WpC_hYf4IMdII  | rs891434   | 4.52                         | 4.33                                  | 0.079                | 2.44                         | 36.59                         | 0.2175 | 7.936  | 0.273                             | 7.143   | 7.757           | 7.941  | 8.09            | 8.929                   |         |
| TMEM156  | BYM1WpC_hYf4IMdII  | rs2566134  | 4.52                         | 4.33                                  | -0.079               | 2.44                         | 40.25                         | 0.2175 | 7.936  | 0.273                             | 7.143   | 7.757           | 7.941  | 8.09            | 8.929                   |         |
| TMEM159  | HSSIDmOvQsDleVQs5I | rs7185682  | 3.31                         | 3.17                                  | -0.061               | 0.81                         | -4.78                         | 0.39   | 8.612  | 0.343                             | 7.749   | 8.365           | 8.605  | 8.863           | 9.67                    |         |
| TMEM165  | xFvuS6rcU5D.f0keFU | rs11133375 | 3.95                         | 3.78                                  | 0.075                | 1.4                          | -37                           | 0.4975 | 8.429  | 0.241                             | 7.642   | 8.293           | 8.414  | 8.583           | 9.051                   |         |
| TMEM16C  | T19NHvhLAX4SVku7w  | rs2349814  | 4.86                         | 4.65                                  | 0.095                | 0.39                         | 28.02                         | 0.105  | 7.11   | 0.014                             | 7.094   | 7.104           | 7.108  | 7.112           | 7.223                   |         |
| TMEM176A | EJJIH5U9FvFVtXnWfQ | rs7806458  | 9.8                          | 9.35                                  | 0.193                | 3.5                          | -20.97                        | 0.3528 | 7.639  | 0.626                             | 7.107   | 7.192           | 7.384  | 7.876           | 10.198                  |         |
| TMEM180  | 6dd55KvNvUURpdwI78 | rs11191293 | 5.46                         | 5.22                                  | -0.11                | 2.06                         | 0.37                          | 0.485  | 7.79   | 0.167                             | 7.356   | 7.686           | 7.775  | 7.862           | 8.59                    |         |
| TMEM201  | WSV5UoKBE4V97e4e_c | rs10779727 | 3.84                         | 3.68                                  | -0.078               | 2.25                         | 12.85                         | 0.185  | 7.305  | 0.105                             | 7.117   | 7.233           | 7.294  | 7.358           | 7.849                   |         |
| TMEM201  | WSV5UoKBE4V97e4e_c | rs4076986  | 3.85                         | 3.68                                  | 0.077                | 2.44                         | 23.5                          | 0.2275 | 7.305  | 0.105                             | 7.117   | 7.233           | 7.294  | 7.358           | 7.849                   |         |
| TMEM25   | fXoo62USKTD0En8gqQ | rs572126   | 20.86                        | 19.87                                 | 0.396                | 3.63                         | -42.76                        | 0.1675 | 7.39   | 0.283                             | 7.107   | 7.194           | 7.262  | 7.521           | 8.354                   |         |
| TMEM25   | fXoo62USKTD0En8gqQ | rs537975   | 20.86                        | 19.87                                 | 0.396                | 3.63                         | -39.05                        | 0.1675 | 7.39   | 0.283                             | 7.107   | 7.194           | 7.262  | 7.521           | 8.354                   |         |
| TMEM25   | fXoo62USKTD0En8gqQ | rs11552421 | 58.99                        | 56.15                                 | 0.746                | 5.66                         | 23.97                         | 0.1375 | 7.39   | 0.283                             | 7.107   | 7.194           | 7.262  | 7.521           | 8.354                   |         |
| TMEM30A  | uq0uDmvSXnF3Xt9MgU | rs240366   | 4.36                         | 4.17                                  | 0.086                | 0.92                         | -47.28                        | 0.075  | 9.914  | 0.337                             | 8.953   | 9.662           | 9.88   | 10.189          | 10.827                  |         |
| TMEM30A  | uq0uDmvSXnF3Xt9MgU | rs240408   | 4.36                         | 4.17                                  | 0.086                | 0.92                         | -25.36                        | 0.075  | 9.914  | 0.337                             | 8.953   | 9.662           | 9.88   | 10.189          | 10.827                  |         |
| TMEM30A  | uq0uDmvSXnF3Xt9MgU | rs431116   | 4.36                         | 4.17                                  | 0.086                | 0.92                         | -16.22                        | 0.075  | 9.914  | 0.337                             | 8.953   | 9.662           | 9.88   | 10.189          | 10.827                  |         |
| TMEM30A  | uq0uDmvSXnF3Xt9MgU | rs240399   | 3.98                         | 3.81                                  | -0.078               | 0.92                         | -13.9                         | 0.08   | 9.914  | 0.337                             | 8.953   | 9.662           | 9.88   | 10.189          | 10.827                  |         |
| TMEM4    | cUR6fjo0VUoqgDrpDk | rs773652   | 3.58                         | 3.43                                  | 0.07                 | 0.17                         | -29.45                        | 0.05   | 10.762 | 0.209                             | 10.111  | 10.631          | 10.754 | 10.869          | 11.439                  |         |
| TMEM4    | cUR6fjo0VUoqgDrpDk | rs2643626  | 3.58                         | 3.43                                  | 0.07                 | 0.17                         | 16.4                          | 0.05   | 10.762 | 0.209                             | 10.111  | 10.631          | 10.754 | 10.869          | 11.439                  |         |
| TMEM4    | cUR6fjo0VUoqgDrpDk | rs2066808  | 3.57                         | 3.42                                  | 0.071                | 0.17                         | 27.85                         | 0.0503 | 10.762 | 0.209                             | 10.111  | 10.631          | 10.754 | 10.869          | 11.439                  |         |
| TMEM41B  | rRCEJN7rmikJKcHKI  | rs7936622  | 4.43                         | 4.24                                  | -0.089               | 1.57                         | -18.75                        | 0.215  | 10.475 | 0.341                             | 9.431   | 10.268          | 10.484 | 10.681          | 11.891                  | Yes     |
| TMEM45B  | 3SIIIT7LxNS7jq54ik | rs10894155 | 4.22                         | 4.03                                  | -0.08                | 1.29                         | -12.66                        | 0.2375 | 7.523  | 0.301                             | 7.111   | 7.286           | 7.463  | 7.681           | 8.616                   |         |
| TMEM45B  | 3SIIIT7LxNS7jq54ik | rs7114881  | 3.52                         | 3.37                                  | -0.064               | 1.73                         | -6.17                         | 0.495  | 7.523  | 0.301                             | 7.111   | 7.286           | 7.463  | 7.681           | 8.616                   |         |
| TMEM45B  | 3SIIIT7LxNS7jq54ik | rs3817614  | 5.69                         | 5.44                                  | 0.11                 | 1.33                         | 5.78                          | 0.3575 | 7.523  | 0.301                             | 7.111   | 7.286           | 7.463  | 7.681           | 8.616                   |         |
| TMEM45B  | 3SIIIT7LxNS7jq54ik | rs2303663  | 5.29                         | 5.05                                  | -0.102               | 1.33                         | 24                            | 0.3643 | 7.523  | 0.301                             | 7.111   | 7.286           | 7.463  | 7.681           | 8.616                   |         |
| TMEM45B  | 3SIIIT7LxNS7jq54ik | rs3734078  | 6.33                         | 6.05                                  | 0.125                | 0.72                         | 42.12                         | 0.275  | 7.523  | 0.301                             | 7.111   | 7.286           | 7.463  | 7.681           | 8.616                   |         |
| TMEM45B  | 3SIIIT7LxNS7jq54ik | rs1650817  | 3.78                         | 3.62                                  | -0.071               | 0.17                         | 43.63                         | 0.4475 | 7.523  | 0.301                             | 7.111   | 7.286           | 7.463  | 7.681           | 8.616                   |         |
| TMEM50B  | W17XLAOpC1dxVUV0Xo | rs2834215  | 8.37                         | 7.99                                  | 0.171                | 4.78                         | -7.91                         | 0.4823 | 8.383  | 0.445                             | 7.455   | 8.083           | 8.341  | 8.656           | 10.966                  |         |
| TMEM50B  | W17XLAOpC1dxVUV0Xo | rs8130924  | 3.86                         | 3.70                                  | -0.076               | 2.46                         | -3.92                         | 0.2803 | 8.383  | 0.445                             | 7.455   | 8.083           | 8.341  | 8.656           | 10.966                  |         |
| TMEM50B  | W17XLAOpC1dxVUV0Xo | rs1532     | 4.04                         | 3.87                                  | 0.079                | 2.63                         | 0.17                          | 0.2825 | 8.383  | 0.445                             | 7.455   | 8.083           | 8.341  | 8.656           | 10.966                  |         |
| TMEM50B  | W17XLAOpC1dxVUV0Xo | rs1059293  | 8.67                         | 8.28                                  | -0.176               | 4.59                         | 4.9                           | 0.485  | 8.383  | 0.445                             | 7.455   | 8.083           | 8.341  | 8.656           | 10.966                  |         |
| TMEM50B  | W17XLAOpC1dxVUV0Xo | rs8131980  | 4.04                         | 3.87                                  | -0.079               | 2.63                         | 5.21                          | 0.2825 | 8.383  | 0.445                             | 7.455   | 8.083           | 8.341  | 8.656           | 10.966                  |         |
| TMEM54   | HnQ6FdqhULqn9BXdvQ | rs7545739  | 3.5                          | 3.36                                  | -0.071               | 1.43                         | 48.51                         | 0.085  | 7.174  | 0.04                              | 7.111   | 7.149           | 7.163  | 7.192           | 7.349                   |         |
| TMEM56   | I97_QDfV4veBUkU0sU | rs6671200  | 4.04                         | 3.87                                  | -0.076               | 1.15                         | 38.66                         | 0.096  | 7.113  | 0.013                             | 7.095   | 7.106           | 7.111  | 7.117           | 7.221                   |         |
| TMEM71   | I4dCp7171f1FVRH65s | rs6471091  | 7.04                         | 6.73                                  | -0.15                | 5.78                         | -24.18                        | 0.4874 | 11.048 | 0.327                             | 10.196  | 10.811          | 11.082 | 11.263          | 12.082                  |         |
| TMEM71   | I4dCp7171f1FVRH65s | rs10097529 | 4.98                         | 4.76                                  | -0.102               | 3.14                         | -17.48                        | 0.165  | 11.048 | 0.327                             | 10.196  | 10.811          | 11.082 | 11.263          | 12.082                  |         |
| TMEM71   | I4dCp7171f1FVRH65s | rs2280871  | 9.62                         | 9.18                                  | 0.197                | 5.52                         | 0.48                          | 0.1575 | 11.048 | 0.327                             | 10.196  | 10.811          | 11.082 | 11.263          | 12.082                  |         |
| TMEM71   | I4dCp7171f1FVRH65s | rs10110952 | 9.44                         | 9.01                                  | 0.204                | 5.94                         | 3.53                          | 0.4975 | 11.048 | 0.327                             | 10.196  | 10.811          | 11.082 | 11.263          | 12.082                  |         |
| TMEM71   | I4dCp7171f1FVRH65s | rs7011665  | 9.46                         | 9.03                                  | -0.202               | 6.13                         | 6.79                          | 0.4975 | 11.048 | 0.327                             | 10.196  | 10.811          | 11.082 | 11.263          | 12.082                  |         |
| TMEM71   | I4dCp7171f1FVRH65s | rs10283307 | 9.2                          | 8.78                                  | 0.192                | 4.95                         | 15.61                         | 0.1475 | 11.048 | 0.327                             | 10.196  | 10.811          | 11.082 | 11.263          | 12.082                  |         |
| TMEM77   | 3gLIx09O6nfU6fC75U | rs11102208 | 3.59                         | 3.43                                  | -0.068               | 1.17                         | -49.22                        | 0.4175 | 9.134  | 0.231                             | 8.549   | 8.979           | 9.142  | 9.278           | 9.746                   |         |
| TMEM77   | 3gLIx09O6nfU6fC75U | rs11102212 | 6.49                         | 6.20                                  | 0.132                | 1.62                         | -17.93                        | 0.304  | 9.134  | 0.231                             | 8.549   | 8.979           | 9.142  | 9.278           | 9.746                   |         |

| Symbol   | Lumi nuID           | SNP        | Population-based             | Population-based                      | % Variance Explained | Family-based                 | Distance from transcript (kb) | MAF    | Transcript abundance (log2 scale) |         |                 |        |                 | SNP mapping under probe |         |
|----------|---------------------|------------|------------------------------|---------------------------------------|----------------------|------------------------------|-------------------------------|--------|-----------------------------------|---------|-----------------|--------|-----------------|-------------------------|---------|
|          |                     |            | association p-value (-log10) | association p-value (-log10), GC adj. |                      | association p-value (-log10) |                               |        | Standard Deviation                | Minimum | 25th percentile | Median | 75th percentile |                         | Maximum |
| TMEM77   | 3gLIx09O6nfU6fC75U  | rs3762374  | 8.03                         | 7.67                                  | 0.162                | 2.19                         | -0.6                          | 0.3225 | 9.134                             | 0.231   | 8.549           | 8.979  | 9.142           | 9.278                   | 9.746   |
| TMEM77   | 3gLIx09O6nfU6fC75U  | rs325923   | 4.55                         | 4.35                                  | 0.088                | 2.34                         | 8.8                           | 0.35   | 9.134                             | 0.231   | 8.549           | 8.979  | 9.142           | 9.278                   | 9.746   |
| TMEM77   | 3gLIx09O6nfU6fC75U  | rs12745827 | 6.08                         | 5.81                                  | -0.119               | 0.83                         | 17.29                         | 0.1925 | 9.134                             | 0.231   | 8.549           | 8.979  | 9.142           | 9.278                   | 9.746   |
| TMEM77   | 3gLIx09O6nfU6fC75U  | rs3818797  | 8.53                         | 8.14                                  | -0.173               | 2.26                         | 45.9                          | 0.32   | 9.134                             | 0.231   | 8.549           | 8.979  | 9.142           | 9.278                   | 9.746   |
| TMEM8    | cpd7qTZtCRdTjhyYQc  | rs3916990  | 13.49                        | 12.86                                 | -0.258               | 5.7                          | -49.26                        | 0.3925 | 9.425                             | 0.715   | 7.86            | 8.97   | 9.414           | 9.912                   | 11.46   |
| TMEM8    | cpd7qTZtCRdTjhyYQc  | rs11648673 | 7.85                         | 7.50                                  | 0.156                | 3.42                         | -44.06                        | 0.2839 | 9.425                             | 0.715   | 7.86            | 8.97   | 9.414           | 9.912                   | 11.46   |
| TMEM8    | cpd7qTZtCRdTjhyYQc  | rs12719801 | 4.11                         | 3.93                                  | -0.078               | 2.73                         | -40.72                        | 0.33   | 9.425                             | 0.715   | 7.86            | 8.97   | 9.414           | 9.912                   | 11.46   |
| TMEM8    | cpd7qTZtCRdTjhyYQc  | rs370681   | 4.29                         | 4.11                                  | -0.083               | 1.66                         | -29.4                         | 0.42   | 9.425                             | 0.715   | 7.86            | 8.97   | 9.414           | 9.912                   | 11.46   |
| TMEM8    | cpd7qTZtCRdTjhyYQc  | rs17136255 | 3.34                         | 3.20                                  | -0.065               | 1.87                         | -21.38                        | 0.1925 | 9.425                             | 0.715   | 7.86            | 8.97   | 9.414           | 9.912                   | 11.46   |
| TMEM8    | cpd7qTZtCRdTjhyYQc  | rs11860497 | 10.23                        | 9.77                                  | -0.202               | 5.03                         | -16.44                        | 0.407  | 9.425                             | 0.715   | 7.86            | 8.97   | 9.414           | 9.912                   | 11.46   |
| TMEM8    | cpd7qTZtCRdTjhyYQc  | rs1802752  | 10.07                        | 9.61                                  | 0.204                | 6.26                         | -2.7                          | 0.165  | 9.425                             | 0.715   | 7.86            | 8.97   | 9.414           | 9.912                   | 11.46   |
| TMEM8    | cpd7qTZtCRdTjhyYQc  | rs2071915  | 16.22                        | 15.46                                 | 0.315                | 6.9                          | 4.57                          | 0.4235 | 9.425                             | 0.715   | 7.86            | 8.97   | 9.414           | 9.912                   | 11.46   |
| TMEM8    | cpd7qTZtCRdTjhyYQc  | rs743961   | 4.28                         | 4.10                                  | 0.081                | 3.1                          | -1.9                          | 0.125  | 9.425                             | 0.715   | 7.86            | 8.97   | 9.414           | 9.912                   | 11.46   |
| TMEM8    | cpd7qTZtCRdTjhyYQc  | rs1573736  | 4.55                         | 4.35                                  | -0.092               | 2.34                         | 0.84                          | 0.304  | 9.425                             | 0.715   | 7.86            | 8.97   | 9.414           | 9.912                   | 11.46   |
| TMEM97   | TnRCUz6Vjy6x7eHRu4  | rs2006933  | 5.33                         | 5.09                                  | 0.108                | 2.61                         | -45.35                        | 0.2337 | 8.617                             | 0.269   | 7.196           | 8.454  | 8.598           | 8.792                   | 9.319   |
| TMEM97   | TnRCUz6Vjy6x7eHRu4  | rs11080055 | 9.5                          | 9.07                                  | 0.195                | 5.03                         | 3.24                          | 0.49   | 8.617                             | 0.269   | 7.196           | 8.454  | 8.598           | 8.792                   | 9.319   |
| TMEM97   | TnRCUz6Vjy6x7eHRu4  | rs3093680  | 9.21                         | 8.79                                  | -0.189               | 4.99                         | 9.55                          | 0.42   | 8.617                             | 0.269   | 7.196           | 8.454  | 8.598           | 8.792                   | 9.319   |
| TMEM97   | TnRCUz6Vjy6x7eHRu4  | rs3093720  | 7.58                         | 7.24                                  | 0.152                | 4.19                         | 10.52                         | 0.145  | 8.617                             | 0.269   | 7.196           | 8.454  | 8.598           | 8.792                   | 9.319   |
| TMOD1    | oJVkUuv0O_l_e7rv0Lk | rs1475545  | 4.19                         | 4.01                                  | -0.08                | 2.75                         | 29.79                         | 0.4646 | 7.489                             | 0.211   | 7.115           | 7.366  | 7.471           | 7.597                   | 8.894   |
| TMOD1    | oJVkUuv0O_l_e7rv0Lk | rs6478262  | 4.05                         | 3.87                                  | -0.077               | 1.88                         | 32.84                         | 0.22   | 7.489                             | 0.211   | 7.115           | 7.366  | 7.471           | 7.597                   | 8.894   |
| TMOD1    | oJVkUuv0O_l_e7rv0Lk | rs10982745 | 3.79                         | 3.63                                  | -0.072               | 1.38                         | 37.65                         | 0.2225 | 7.489                             | 0.211   | 7.115           | 7.366  | 7.471           | 7.597                   | 8.894   |
| TMOD1    | oJVkUuv0O_l_e7rv0Lk | rs1536950  | 3.68                         | 3.53                                  | 0.067                | 1.19                         | -29.76                        | 0.24   | 7.489                             | 0.211   | 7.115           | 7.366  | 7.471           | 7.597                   | 8.894   |
| TMOD1    | oJVkUuv0O_l_e7rv0Lk | rs2031999  | 8.85                         | 8.45                                  | -0.169               | 3.92                         | -29.37                        | 0.4625 | 7.489                             | 0.211   | 7.115           | 7.366  | 7.471           | 7.597                   | 8.894   |
| TMOD1    | oJVkUuv0O_l_e7rv0Lk | rs2149986  | 7.07                         | 6.75                                  | 0.137                | 4.13                         | -28.94                        | 0.4192 | 7.489                             | 0.211   | 7.115           | 7.366  | 7.471           | 7.597                   | 8.894   |
| TMOD1    | oJVkUuv0O_l_e7rv0Lk | rs913912   | 12.66                        | 12.07                                 | 0.235                | 7.02                         | -22.49                        | 0.3869 | 7.489                             | 0.211   | 7.115           | 7.366  | 7.471           | 7.597                   | 8.894   |
| TMOD1    | oJVkUuv0O_l_e7rv0Lk | rs2805792  | 7.1                          | 6.78                                  | -0.133               | 2.84                         | -9.73                         | 0.1575 | 7.489                             | 0.211   | 7.115           | 7.366  | 7.471           | 7.597                   | 8.894   |
| TMOD1    | oJVkUuv0O_l_e7rv0Lk | rs2805787  | 7.45                         | 7.12                                  | -0.14                | 3                            | -6.87                         | 0.16   | 7.489                             | 0.211   | 7.115           | 7.366  | 7.471           | 7.597                   | 8.894   |
| TMOD1    | oJVkUuv0O_l_e7rv0Lk | rs2773347  | 5.76                         | 5.50                                  | -0.112               | 1.48                         | 24.67                         | 0.3434 | 7.489                             | 0.211   | 7.115           | 7.366  | 7.471           | 7.597                   | 8.894   |
| TMPRSS3  | osQIAinqQ4TZxgnpY   | rs2277798  | 4.71                         | 4.50                                  | 0.09                 | 2.63                         | 7.91                          | 0.3775 | 7.206                             | 0.078   | 7.111           | 7.16   | 7.186           | 7.226                   | 7.623   |
| TMPRSS3  | HxN6t3O695J31.v0lo  | rs2277798  | 3.77                         | 3.61                                  | 0.07                 | 2.14                         | 7.91                          | 0.3775 | 7.3                               | 0.137   | 7.109           | 7.191  | 7.278           | 7.382                   | 7.753   |
| TMPRSS3  | osQIAinqQ4TZxgnpY   | rs2839509  | 4.07                         | 3.89                                  | 0.075                | 1.8                          | 30.53                         | 0.27   | 7.206                             | 0.078   | 7.111           | 7.16   | 7.186           | 7.226                   | 7.623   |
| TMTC4    | QQ_AvQIOfyklkpJdE0  | rs1055705  | 8.08                         | 7.72                                  | -0.161               | 0.86                         | -17.37                        | 0.335  | 7.906                             | 0.186   | 7.212           | 7.786  | 7.905           | 8.016                   | 8.864   |
| TMTC4    | QQ_AvQIOfyklkpJdE0  | rs9513774  | 4.8                          | 4.59                                  | 0.096                | 0.34                         | -17.07                        | 0.3568 | 7.906                             | 0.186   | 7.212           | 7.786  | 7.905           | 8.016                   | 8.864   |
| TMTC4    | QQ_AvQIOfyklkpJdE0  | rs946837   | 8.88                         | 8.48                                  | 0.179                | 0.9                          | -7.15                         | 0.3325 | 7.906                             | 0.186   | 7.212           | 7.786  | 7.905           | 8.016                   | 8.864   |
| TMTC4    | QQ_AvQIOfyklkpJdE0  | rs9557470  | 3.34                         | 3.20                                  | 0.064                | 0.26                         | 2.26                          | 0.295  | 7.906                             | 0.186   | 7.212           | 7.786  | 7.905           | 8.016                   | 8.864   |
| TMTC4    | QQ_AvQIOfyklkpJdE0  | rs945962   | 8.81                         | 8.41                                  | 0.179                | 0.92                         | 23.65                         | 0.3333 | 7.906                             | 0.186   | 7.212           | 7.786  | 7.905           | 8.016                   | 8.864   |
| TMTC4    | QQ_AvQIOfyklkpJdE0  | rs9518128  | 4.62                         | 4.42                                  | -0.092               | 0.21                         | 26.76                         | 0.4325 | 7.906                             | 0.186   | 7.212           | 7.786  | 7.905           | 8.016                   | 8.864   |
| NFRSF10B | B8p.nM1UpQMk7hEoSU  | rs12545375 | 3.32                         | 3.18                                  | -0.065               | 1.25                         | 25.13                         | 0.0525 | 9.808                             | 0.358   | 7.119           | 9.689  | 9.812           | 9.939                   | 10.823  |
| TNFRSF14 | rJQp6Hq_nku678ujFE  | rs6667605  | 7.15                         | 6.83                                  | 0.141                | 2.16                         | 6.03                          | 0.48   | 13.086                            | 0.344   | 12.3            | 12.856 | 13.025          | 13.258                  | 14.348  |
| TNFRSF14 | rJQp6Hq_nku678ujFE  | rs734999   | 7.76                         | 7.41                                  | 0.155                | 3.15                         | 16.46                         | 0.4625 | 13.086                            | 0.344   | 12.3            | 12.856 | 13.025          | 13.258                  | 14.348  |
| TNFRSF14 | rJQp6Hq_nku678ujFE  | rs3748816  | 4.49                         | 4.30                                  | 0.086                | 1.13                         | 29.99                         | 0.3425 | 13.086                            | 0.344   | 12.3            | 12.856 | 13.025          | 13.258                  | 14.348  |
| TNFSF12  | ER7He6kKORUghVHOpE  | rs4968210  | 4.28                         | 4.10                                  | 0.087                | 1.7                          | -3.86                         | 0.4125 | 10.067                            | 0.256   | 9.428           | 9.901  | 10.075          | 10.234                  | 10.644  |
| TNFSF13B | rpB1LSBJDCblvSrUg   | rs9514831  | 3.53                         | 3.38                                  | -0.064               | 1.02                         | 14.21                         | 0.2225 | 9.348                             | 0.715   | 7.259           | 8.802  | 9.276           | 9.81                    | 11.504  |
| TNFSF13B | rpB1LSBJDCblvSrUg   | rs1224174  | 3.46                         | 3.32                                  | 0.063                | 0.88                         | 19.68                         | 0.215  | 9.348                             | 0.715   | 7.259           | 8.802  | 9.276           | 9.81                    | 11.504  |
| TNFSF8   | Kre3goJBlguqDUi5yk  | rs2295800  | 4.59                         | 4.39                                  | 0.087                | 3.5                          | -0.91                         | 0.4325 | 8.537                             | 0.463   | 7.198           | 8.222  | 8.526           | 8.841                   | 9.69    |
| TNFSF8   | Kre3goJBlguqDUi5yk  | rs3181348  | 5.08                         | 4.86                                  | 0.097                | 3.86                         | 1.41                          | 0.4125 | 8.537                             | 0.463   | 7.198           | 8.222  | 8.526           | 8.841                   | 9.69    |
| TNIK     | HW5jeigsC7.04V0Eg   | rs12486818 | 3.3                          | 3.16                                  | 0.062                | 1.75                         | 13.53                         | 0.095  | 8.27                              | 0.331   | 7.109           | 8.095  | 8.256           | 8.477                   | 9.104   |
| TNNT1    | ihLpF6gl6i7_1Tayfg  | rs7248997  | 4.85                         | 4.64                                  | 0.094                | 2.91                         | 20.17                         | 0.345  | 7.516                             | 0.491   | 7.124           | 7.212  | 7.318           | 7.627                   | 9.856   |
| TNNT1    | ihLpF6gl6i7_1Tayfg  | rs6509931  | 4.19                         | 4.01                                  | 0.08                 | 1.17                         | 21.26                         | 0.09   | 7.516                             | 0.491   | 7.124           | 7.212  | 7.318           | 7.627                   | 9.856   |
| TNNT1    | ihLpF6gl6i7_1Tayfg  | rs6509933  | 4.18                         | 4.00                                  | -0.079               | 2.5                          | 22.53                         | 0.4    | 7.516                             | 0.491   | 7.124           | 7.212  | 7.318           | 7.627                   | 9.856   |
| TNNT1    | ihLpF6gl6i7_1Tayfg  | rs2288419  | 6.17                         | 5.89                                  | -0.121               | 2.47                         | 32.67                         | 0.2175 | 7.516                             | 0.491   | 7.124           | 7.212  | 7.318           | 7.627                   | 9.856   |
| TNRC6A   | BloWNONHoOuep7agcE  | rs200528   | 4.06                         | 3.88                                  | 0.076                | 1.37                         | 17.56                         | 0.205  | 7.378                             | 0.152   | 7.122           | 7.287  | 7.349           | 7.433                   | 8.258   |
| TNRC6A   | BloWNONHoOuep7agcE  | rs11862971 | 4.06                         | 3.88                                  | 0.076                | 1.21                         | 26                            | 0.205  | 7.378                             | 0.152   | 7.122           | 7.287  | 7.349           | 7.433                   | 8.258   |
| TNRC6A   | BloWNONHoOuep7agcE  | rs3803716  | 4                            | 3.83                                  | -0.075               | 1.66                         | -32.8                         | 0.2035 | 7.378                             | 0.152   | 7.122           | 7.287  | 7.349           | 7.433                   | 8.258   |
| TNRC6A   | BloWNONHoOuep7agcE  | rs2112783  | 3.82                         | 3.66                                  | 0.071                | 1.37                         | -22.62                        | 0.2025 | 7.378                             | 0.152   | 7.122           | 7.287  | 7.349           | 7.433                   | 8.258   |
| TNRC6A   | BloWNONHoOuep7agcE  | rs1862450  | 3.9                          | 3.73                                  | 0.073                | 1.3                          | 21.65                         | 0.205  | 7.378                             | 0.152   | 7.122           | 7.287  | 7.349           | 7.433                   | 8.258   |
| TOR1B    | 9K1yu4XJFFF7pJFqc   | rs3844048  | 3.3                          | 3.16                                  | 0.062                | 0.75                         | -43.16                        | 0.255  | 8.77                              | 0.221   | 8.244           | 8.635  | 8.751           | 8.889                   | 9.617   |
| TOR1B    | 9K1yu4XJFFF7pJFqc   | rs17418275 | 3.79                         | 3.63                                  | -0.075               | 0.02                         | -28.39                        | 0.05   | 8.77                              | 0.221   | 8.244           | 8.635  | 8.751           | 8.889                   | 9.617   |
| TOR1B    | 9K1yu4XJFFF7pJFqc   | rs16931454 | 4.82                         | 4.61                                  | -0.097               | 0.44                         | -15.45                        | 0.0628 | 8.77                              | 0.221   | 8.244           | 8.635  | 8.751           | 8.889                   | 9.617   |
| TOR1B    | 9K1yu4XJFFF7pJFqc   | rs10116248 | 3.45                         | 3.30                                  | 0.067                | 0.78                         | 3.07                          | 0.2275 | 8.77                              | 0.221   | 8.244           | 8.635  | 8.751           | 8.889                   | 9.617   |
| TOR1B    | 9K1yu4XJFFF7pJFqc   | rs2287367  | 3.76                         | 3.61                                  | 0.074                | 0.93                         | -0.77                         | 0.225  | 8.77                              | 0.221   | 8.244           | 8.635  | 8.751           | 8.889                   | 9.617   |
| TOR1B    | 9K1yu4XJFFF7pJFqc   | rs2296793  | 4.55                         | 4.36                                  | -0.092               | 1.28                         | 11.5                          | 0.195  | 8.77                              | 0.221   | 8.244           | 8.635  | 8.751           | 8.889                   | 9.617   |

| Symbol   | Lumi nuID          | SNP        | Population-based association |                  | % Variance Explained | Family-based association |                               | Transcript abundance (log2 scale) |        |                    |                 |        |                 |         | SNP mapping under probe |     |
|----------|--------------------|------------|------------------------------|------------------|----------------------|--------------------------|-------------------------------|-----------------------------------|--------|--------------------|-----------------|--------|-----------------|---------|-------------------------|-----|
|          |                    |            | p-value (-log10)             | p-value (-log10) |                      | p-value (-log10)         | Distance from transcript (kb) | MAF                               | Mean   | Standard Deviation | 25th percentile | Median | 75th percentile | Maximum |                         |     |
| TPCN2    | KFTfWqT0rjnr_E4    | rs896978   | 8.95                         | 8.54             | 0.172                | 1.88                     | 12.56                         | 0.3175                            | 8.326  | 0.354              | 7.559           | 8.091  | 8.298           | 8.505   | 9.475                   |     |
| TPCN2    | KFTfWqT0rjnr_E4    | rs3750965  | 9.55                         | 9.11             | -0.183               | 1.89                     | -15.83                        | 0.3325                            | 8.326  | 0.354              | 7.559           | 8.091  | 8.298           | 8.505   | 9.475                   |     |
| TPCN2    | KFTfWqT0rjnr_E4    | rs731974   | 9.55                         | 9.11             | -0.183               | 1.95                     | -8.8                          | 0.3325                            | 8.326  | 0.354              | 7.559           | 8.091  | 8.298           | 8.505   | 9.475                   |     |
| TPD52    | Z5U_KAqkLU85B93UBU | rs12679499 | 4.65                         | 4.44             | 0.09                 | 0.26                     | 31.96                         | 0.4225                            | 7.347  | 0.105              | 7.111           | 7.284  | 7.351           | 7.425   | 7.605                   |     |
| TPD52    | Z5U_KAqkLU85B93UBU | rs9643749  | 4.65                         | 4.44             | -0.09                | 0.25                     | 42.35                         | 0.4225                            | 7.347  | 0.105              | 7.111           | 7.284  | 7.351           | 7.425   | 7.605                   |     |
| TPM2     | H0Uhf0UhXnoHQQXuKk | rs2275420  | 3.63                         | 3.47             | 0.069                | 0.39                     | -21.09                        | 0.1275                            | 10.268 | 0.634              | 8.279           | 9.952  | 10.194          | 10.716  | 12.336                  |     |
| TPM2     | H0Uhf0UhXnoHQQXuKk | rs2297879  | 4.6                          | 4.40             | 0.09                 | 2.81                     | -19.74                        | 0.3                               | 10.268 | 0.634              | 8.279           | 9.952  | 10.194          | 10.716  | 12.336                  |     |
| TPM2     | H0Uhf0UhXnoHQQXuKk | rs1934158  | 3.31                         | 3.17             | -0.062               | 0.4                      | -10.36                        | 0.125                             | 10.268 | 0.634              | 8.279           | 9.952  | 10.194          | 10.716  | 12.336                  |     |
| TPM2     | H0Uhf0UhXnoHQQXuKk | rs1243872  | 4.06                         | 3.88             | -0.078               | 0.19                     | -3.65                         | 0.4416                            | 10.268 | 0.634              | 8.279           | 9.952  | 10.194          | 10.716  | 12.336                  |     |
| TPM2     | H0Uhf0UhXnoHQQXuKk | rs867194   | 4.07                         | 3.90             | 0.08                 | 3.72                     | 15.03                         | 0.2702                            | 10.268 | 0.634              | 8.279           | 9.952  | 10.194          | 10.716  | 12.336                  |     |
| TPM2     | H0Uhf0UhXnoHQQXuKk | rs2295795  | 11.72                        | 11.18            | 0.223                | 3.87                     | 21.95                         | 0.2975                            | 10.268 | 0.634              | 8.279           | 9.952  | 10.194          | 10.716  | 12.336                  |     |
| TPM2     | H0Uhf0UhXnoHQQXuKk | rs2295797  | 12.02                        | 11.47            | 0.228                | 4.11                     | 32.23                         | 0.3065                            | 10.268 | 0.634              | 8.279           | 9.952  | 10.194          | 10.716  | 12.336                  |     |
| TPM2     | H0Uhf0UhXnoHQQXuKk | rs3763630  | 7.26                         | 6.94             | -0.141               | 2.53                     | 40.95                         | 0.18                              | 10.268 | 0.634              | 8.279           | 9.952  | 10.194          | 10.716  | 12.336                  |     |
| TPP2     | iTrv98OXRPNpGqO5Xk | rs9518774  | 3.75                         | 3.59             | -0.07                | 1.47                     | -49.16                        | 0.3425                            | 8.647  | 0.302              | 7.171           | 8.484  | 8.673           | 8.848   | 9.313                   |     |
| TPP2     | iTrv98OXRPNpGqO5Xk | rs6491694  | 3.53                         | 3.38             | -0.067               | 1.07                     | -24.45                        | 0.335                             | 8.647  | 0.302              | 7.171           | 8.484  | 8.673           | 8.848   | 9.313                   |     |
| TPP2     | iTrv98OXRPNpGqO5Xk | rs9514035  | 3.68                         | 3.53             | -0.068               | 1.21                     | -20.21                        | 0.4175                            | 8.647  | 0.302              | 7.171           | 8.484  | 8.673           | 8.848   | 9.313                   |     |
| TPP2     | iTrv98OXRPNpGqO5Xk | rs4772492  | 4.04                         | 3.87             | -0.076               | 1.68                     | -1.75                         | 0.4365                            | 8.647  | 0.302              | 7.171           | 8.484  | 8.673           | 8.848   | 9.313                   |     |
| TPST2    | rrgUgSRddUfKCduP1l | rs2283824  | 3.92                         | 3.75             | 0.076                | 0.78                     | 2.74                          | 0.3625                            | 9.374  | 0.337              | 8.552           | 9.136  | 9.36            | 9.58    | 10.813                  |     |
| TRA2A    | cmREUEUpNxOpIUHTLo | rs12534005 | 4.34                         | 4.15             | 0.087                | 0.07                     | -41.88                        | 0.125                             | 9.438  | 0.44               | 7.891           | 9.177  | 9.463           | 9.745   | 10.465                  |     |
| TRA2A    | cmREUEUpNxOpIUHTLo | rs10259241 | 4.26                         | 4.07             | -0.084               | 0.04                     | 11.41                         | 0.1275                            | 9.438  | 0.44               | 7.891           | 9.177  | 9.463           | 9.745   | 10.465                  |     |
| TRA2A    | cmREUEUpNxOpIUHTLo | rs10246526 | 3.63                         | 3.48             | 0.07                 | 0.19                     | 32                            | 0.0859                            | 9.438  | 0.44               | 7.891           | 9.177  | 9.463           | 9.745   | 10.465                  |     |
| TRAM2    | uTeCjgcKeeuV4kHJdK | rs6778     | 4.4                          | 4.21             | -0.089               | 0.4                      | 0.2                           | 0.2525                            | 8.587  | 0.219              | 7.922           | 8.446  | 8.576           | 8.714   | 9.192                   |     |
| TRAM2    | uTeCjgcKeeuV4kHJdK | rs12194847 | 3.95                         | 3.79             | 0.08                 | 0.03                     | 18.98                         | 0.2925                            | 8.587  | 0.219              | 7.922           | 8.446  | 8.576           | 8.714   | 9.192                   |     |
| TRAP1    | 0UJZ6iOfUpGZ00lJ4M | rs2072379  | 5.96                         | 5.70             | 0.114                | 2.38                     | -28.63                        | 0.3274                            | 9.205  | 0.373              | 8.495           | 8.93   | 9.166           | 9.455   | 10.231                  |     |
| TRAPPC2L | uGHuuqW2l73r5d9eDo | rs3743546  | 4.35                         | 4.17             | -0.081               | 1.13                     | -30.09                        | 0.325                             | 10.697 | 0.31               | 9.822           | 10.492 | 10.687          | 10.917  | 11.795                  |     |
| TRAPPC2L | uGHuuqW2l73r5d9eDo | rs3826061  | 7.28                         | 6.96             | 0.145                | 1.45                     | -0.3                          | 0.3525                            | 10.697 | 0.31               | 9.822           | 10.492 | 10.687          | 10.917  | 11.795                  |     |
| TRAPPC2L | uGHuuqW2l73r5d9eDo | rs2272439  | 4.94                         | 4.73             | 0.094                | 1                        | 19.24                         | 0.115                             | 10.697 | 0.31               | 9.822           | 10.492 | 10.687          | 10.917  | 11.795                  |     |
| TRAPPC2L | uGHuuqW2l73r5d9eDo | rs522145   | 5.56                         | 5.32             | 0.112                | 1.39                     | 36.34                         | 0.175                             | 10.697 | 0.31               | 9.822           | 10.492 | 10.687          | 10.917  | 11.795                  |     |
| TRAPPC4  | N6F6tMp4F7zoVUD3il | rs3916581  | 5.23                         | 5.00             | 0.107                | 1.66                     | -1.35                         | 0.2714                            | 10.536 | 0.291              | 9.721           | 10.337 | 10.542          | 10.741  | 11.189                  | Yes |
| TRAPPC4  | N6F6tMp4F7zoVUD3il | rs4938621  | 4.53                         | 4.33             | 0.092                | 0.95                     | -2.1                          | 0.2563                            | 10.536 | 0.291              | 9.721           | 10.337 | 10.542          | 10.741  | 11.189                  | Yes |
| TRAPPC4  | N6F6tMp4F7zoVUD3il | rs11006    | 5.33                         | 5.10             | 0.107                | 1.07                     | 0.82                          | 0.255                             | 10.536 | 0.291              | 9.721           | 10.337 | 10.542          | 10.741  | 11.189                  | Yes |
| TREML4   | ISdeUTjTRc3ulpNn.k | rs9357347  | 3.62                         | 3.47             | -0.067               | 1.07                     | -45.47                        | 0.3141                            | 7.149  | 0.076              | 7.1             | 7.112  | 7.121           | 7.141   | 7.631                   |     |
| TREML4   | ISdeUTjTRc3ulpNn.k | rs9381042  | 10.68                        | 10.19            | 0.207                | 3.64                     | -24.85                        | 0.1175                            | 7.149  | 0.076              | 7.1             | 7.112  | 7.121           | 7.141   | 7.631                   |     |
| TREML4   | ISdeUTjTRc3ulpNn.k | rs2253676  | 7.52                         | 7.18             | -0.146               | 2.47                     | -14.57                        | 0.1025                            | 7.149  | 0.076              | 7.1             | 7.112  | 7.121           | 7.141   | 7.631                   |     |
| TREML4   | ISdeUTjTRc3ulpNn.k | rs9367097  | 3.3                          | 3.17             | -0.061               | 1.09                     | -10.6                         | 0.3575                            | 7.149  | 0.076              | 7.1             | 7.112  | 7.121           | 7.141   | 7.631                   |     |
| TREML4   | ISdeUTjTRc3ulpNn.k | rs9349180  | 15.6                         | 14.88            | 0.302                | 5.67                     | -10.59                        | 0.191                             | 7.149  | 0.076              | 7.1             | 7.112  | 7.121           | 7.141   | 7.631                   |     |
| TREML4   | ISdeUTjTRc3ulpNn.k | rs986030   | 16.48                        | 15.72            | -0.313               | 5.96                     | -5.16                         | 0.1875                            | 7.149  | 0.076              | 7.1             | 7.112  | 7.121           | 7.141   | 7.631                   |     |
| TREML4   | ISdeUTjTRc3ulpNn.k | rs6921835  | 15.78                        | 15.04            | -0.301               | 5.74                     | -0.62                         | 0.1925                            | 7.149  | 0.076              | 7.1             | 7.112  | 7.121           | 7.141   | 7.631                   |     |
| TREML4   | ISdeUTjTRc3ulpNn.k | rs2101269  | 16.4                         | 15.64            | -0.313               | 5.9                      | 0.69                          | 0.1884                            | 7.149  | 0.076              | 7.1             | 7.112  | 7.121           | 7.141   | 7.631                   |     |
| TREML4   | ISdeUTjTRc3ulpNn.k | rs7769759  | 15.87                        | 15.13            | -0.307               | 5.57                     | 1.8                           | 0.1853                            | 7.149  | 0.076              | 7.1             | 7.112  | 7.121           | 7.141   | 7.631                   |     |
| TREML4   | ISdeUTjTRc3ulpNn.k | rs9357349  | 3.54                         | 3.39             | -0.064               | 1.22                     | 4.83                          | 0.355                             | 7.149  | 0.076              | 7.1             | 7.112  | 7.121           | 7.141   | 7.631                   |     |
| TREML4   | ISdeUTjTRc3ulpNn.k | rs9296359  | 3.43                         | 3.29             | 0.062                | 1.13                     | -0.43                         | 0.35                              | 7.149  | 0.076              | 7.1             | 7.112  | 7.121           | 7.141   | 7.631                   |     |
| TREML4   | ISdeUTjTRc3ulpNn.k | rs1982756  | 7.82                         | 7.47             | -0.152               | 3.37                     | -0.35                         | 0.11                              | 7.149  | 0.076              | 7.1             | 7.112  | 7.121           | 7.141   | 7.631                   |     |
| TRIM14   | Z3FyNJunrVfHl598qU | rs3780465  | 3.48                         | 3.33             | -0.067               | 0.13                     | 24.18                         | 0.1                               | 7.619  | 0.343              | 7.139           | 7.392  | 7.572           | 7.75    | 8.93                    |     |
| TRIM31   | o8kh6BRRkjd7Kq6OIE | rs1150739  | 4.16                         | 3.98             | 0.08                 | 0.94                     | -39.33                        | 0.385                             | 7.181  | 0.054              | 7.103           | 7.14   | 7.17            | 7.211   | 7.398                   |     |
| TRIM31   | o8kh6BRRkjd7Kq6OIE | rs9261301  | 3.67                         | 3.51             | 0.071                | 1.11                     | -29.11                        | 0.4925                            | 7.181  | 0.054              | 7.103           | 7.14   | 7.17            | 7.211   | 7.398                   |     |
| TRIM35   | ozVNBKk4q944dRNXS4 | rs2322602  | 3.81                         | 3.65             | -0.072               | 3.13                     | -11.53                        | 0.4475                            | 7.83   | 0.196              | 7.17            | 7.702  | 7.824           | 7.955   | 8.692                   |     |
| TRIM35   | ozVNBKk4q944dRNXS4 | rs6557991  | 3.47                         | 3.32             | -0.065               | 2.81                     | 6.47                          | 0.4525                            | 7.83   | 0.196              | 7.17            | 7.702  | 7.824           | 7.955   | 8.692                   |     |
| TRIM5    | WRQ4OLXyV7l8V2OV8  | rs12808061 | 3.53                         | 3.38             | 0.065                | 2.98                     | 5.19                          | 0.0875                            | 8.86   | 0.388              | 7.123           | 8.644  | 8.864           | 9.109   | 10.392                  |     |
| TRIML2   | 0dU_ZfUKJ3S17v9Xew | rs6849766  | 3.48                         | 3.33             | -0.067               | 0.22                     | -1.91                         | 0.1475                            | 7.108  | 0.009              | 7.093           | 7.102  | 7.107           | 7.111   | 7.154                   |     |
| TRIML2   | 0dU_ZfUKJ3S17v9Xew | rs902910   | 4.11                         | 3.93             | -0.081               | 0.06                     | -6.06                         | 0.07                              | 7.108  | 0.009              | 7.093           | 7.102  | 7.107           | 7.111   | 7.154                   |     |
| TRIP11   | KlJvF4QS56rNgIX.A  | rs10146335 | 3.32                         | 3.18             | -0.063               | 2.23                     | -12.55                        | 0.295                             | 9.044  | 0.248              | 8.332           | 8.873  | 9.043           | 9.192   | 9.828                   |     |
| TRIP11   | KlJvF4QS56rNgIX.A  | rs1051340  | 3.66                         | 3.50             | 0.072                | 2.07                     | 5.21                          | 0.3036                            | 9.044  | 0.248              | 8.332           | 8.873  | 9.043           | 9.192   | 9.828                   |     |
| TRIP6    | Ev9E_nvELmKlup553U | rs314370   | 6.09                         | 5.82             | 0.124                | 1.47                     | -11.84                        | 0.1658                            | 8.197  | 0.296              | 7.608           | 7.962  | 8.194           | 8.39    | 9.218                   |     |
| TRIP6    | Ev9E_nvELmKlup553U | rs13245899 | 6.95                         | 6.68             | -0.14                | 1.68                     | 26.05                         | 0.16                              | 8.197  | 0.296              | 7.608           | 7.962  | 8.194           | 8.39    | 9.218                   |     |
| TRMT12   | WgoqUI6ASlhS4op97o | rs3812475  | 3.32                         | 3.14             | -0.063               | 3.55                     | 0.19                          | 0.4675                            | 9.333  | 0.317              | 7.217           | 9.144  | 9.376           | 9.535   | 10.057                  |     |
| TRMT12   | WgoqUI6ASlhS4op97o | rs4128468  | 3.43                         | 3.29             | -0.065               | 3.78                     | 14.57                         | 0.455                             | 9.333  | 0.317              | 7.217           | 9.144  | 9.376           | 9.535   | 10.057                  |     |
| TRMT12   | WgoqUI6ASlhS4op97o | rs3812471  | 3.54                         | 3.39             | 0.068                | 3.84                     | 33.45                         | 0.4575                            | 9.333  | 0.317              | 7.217           | 9.144  | 9.376           | 9.535   | 10.057                  |     |
| TRPC4AP  | Ne701CqvdUguKpf1dQ | rs6088659  | 5.83                         | 5.57             | 0.114                | 2.06                     | -47.6                         | 0.1975                            | 9.488  | 0.32               | 8.74            | 9.251  | 9.483           | 9.668   | 10.387                  |     |
| TRPC4AP  | Ne701CqvdUguKpf1dQ | rs6088662  | 6.77                         | 6.46             | 0.133                | 1.51                     | -42.57                        | 0.2125                            | 9.488  | 0.32               | 8.74            | 9.251  | 9.483           | 9.668   | 10.387                  |     |
| TRPC4AP  | Ne701CqvdUguKpf1dQ | rs6120777  | 5.29                         | 5.06             | 0.101                | 1.96                     | -30.04                        | 0.1667                            | 9.488  | 0.32               | 8.74            | 9.251  | 9.483           | 9.668   | 10.387                  |     |
| TRPC4AP  | Ne701CqvdUguKpf1dQ | rs6058154  | 18.92                        | 18.04            | -0.344               | 5.35                     | -4.37                         | 0.4698                            | 9.488  | 0.32               | 8.74            | 9.251  | 9.483           | 9.668   | 10.387                  |     |

| Symbol  | Lumi nuID          | SNP        | Population-based | Population-based          | % Variance | Family-based     | Distance from   | MAF    | Mean      | Transcript abundance (log2 scale) |            |            |            |         | SNP mapping under probe |
|---------|--------------------|------------|------------------|---------------------------|------------|------------------|-----------------|--------|-----------|-----------------------------------|------------|------------|------------|---------|-------------------------|
|         |                    |            | association      | association               |            | association      |                 |        |           | Transcript                        | Standard   | 25th       | Median     | 75th    |                         |
|         |                    |            | p-value (-log10) | p-value (-log10), GC adj. | Explained  | p-value (-log10) | transcript (kb) |        | Deviation | Minimum                           | percentile | percentile | percentile | Maximum |                         |
| TRPC4AP | Ne701CqvdUguKpf1dQ | rs6060151  | 6.94             | 6.63                      | 0.138      | 2.28             | 4.02            | 0.3175 | 9.488     | 0.32                              | 8.74       | 9.251      | 9.483      | 9.668   | 10.387                  |
| TRPC4AP | Ne701CqvdUguKpf1dQ | rs6120804  | 6.4              | 6.11                      | 0.126      | 2.03             | 33.49           | 0.21   | 9.488     | 0.32                              | 8.74       | 9.251      | 9.483      | 9.668   | 10.387                  |
| TRPC4AP | Ne701CqvdUguKpf1dQ | rs6088691  | 6.11             | 5.84                      | -0.124     | 1.61             | 43.55           | 0.2132 | 9.488     | 0.32                              | 8.74       | 9.251      | 9.483      | 9.668   | 10.387                  |
| TRPC4AP | Ne701CqvdUguKpf1dQ | rs13042358 | 19.46            | 18.54                     | -0.35      | 5.31             | 44.27           | 0.4725 | 9.488     | 0.32                              | 8.74       | 9.251      | 9.483      | 9.668   | 10.387                  |
| TRPC4AP | Ne701CqvdUguKpf1dQ | rs1998233  | 4.41             | 4.22                      | -0.087     | 2.25             | -23.49          | 0.2375 | 9.488     | 0.32                              | 8.74       | 9.251      | 9.483      | 9.668   | 10.387                  |
| TRPC4AP | Ne701CqvdUguKpf1dQ | rs2145557  | 6.66             | 6.36                      | 0.132      | 2.28             | -13.06          | 0.315  | 9.488     | 0.32                              | 8.74       | 9.251      | 9.483      | 9.668   | 10.387                  |
| TRPC4AP | Ne701CqvdUguKpf1dQ | rs6088713  | 4.39             | 4.20                      | -0.088     | 1.83             | 13.24           | 0.2563 | 9.488     | 0.32                              | 8.74       | 9.251      | 9.483      | 9.668   | 10.387                  |
| TRPC4AP | Ne701CqvdUguKpf1dQ | rs3746429  | 6.7              | 6.40                      | -0.132     | 2.28             | 22.99           | 0.19   | 9.488     | 0.32                              | 8.74       | 9.251      | 9.483      | 9.668   | 10.387                  |
| TRPC4AP | Ne701CqvdUguKpf1dQ | rs6088721  | 5.43             | 5.20                      | 0.11       | 1.66             | 25.39           | 0.3266 | 9.488     | 0.32                              | 8.74       | 9.251      | 9.483      | 9.668   | 10.387                  |
| TRPC4AP | Ne701CqvdUguKpf1dQ | rs6088722  | 4.19             | 4.01                      | -0.084     | 1.83             | 25.57           | 0.2525 | 9.488     | 0.32                              | 8.74       | 9.251      | 9.483      | 9.668   | 10.387                  |
| TRPC4AP | Ne701CqvdUguKpf1dQ | rs6088727  | 6.25             | 5.98                      | -0.125     | 1.84             | 33.02           | 0.335  | 9.488     | 0.32                              | 8.74       | 9.251      | 9.483      | 9.668   | 10.387                  |
| TRPC4AP | Ne701CqvdUguKpf1dQ | rs1535466  | 4.55             | 4.36                      | -0.091     | 2.44             | 38.09           | 0.2325 | 9.488     | 0.32                              | 8.74       | 9.251      | 9.483      | 9.668   | 10.387                  |
| TRPM2   | 6XSVxVQv3XeFTSdX18 | rs2070572  | 3.35             | 3.21                      | 0.063      | 1.3              | -15.58          | 0.385  | 7.148     | 0.045                             | 7.107      | 7.126      | 7.134      | 7.15    | 7.447                   |
| TSGA10  | 9Gn7IVZiCgrYIK8UUA | rs6542847  | 6.44             | 6.16                      | -0.127     | 3.48             | -40.88          | 0.455  | 7.551     | 0.209                             | 7.11       | 7.399      | 7.553      | 7.693   | 8.156                   |
| TSGA10  | rRSBudFNjdeFilyNjQ | rs6542847  | 4.33             | 4.14                      | -0.081     | 2.12             | -40.88          | 0.455  | 7.261     | 0.113                             | 7.098      | 7.166      | 7.242      | 7.333   | 7.627                   |
| TSGA10  | Z1Pjr_Mup6goCe711E | rs6542847  | 3.59             | 3.44                      | -0.067     | 1.69             | -40.88          | 0.455  | 7.16      | 0.065                             | 7.097      | 7.115      | 7.136      | 7.181   | 7.515                   |
| TSGA10  | rRSBudFNjdeFilyNjQ | rs988825   | 4.31             | 4.13                      | -0.082     | 0.5              | -38.63          | 0.07   | 7.261     | 0.113                             | 7.098      | 7.166      | 7.242      | 7.333   | 7.627                   |
| TSGA10  | 9Gn7IVZiCgrYIK8UUA | rs988825   | 3.6              | 3.45                      | -0.069     | 0.44             | -38.64          | 0.07   | 7.551     | 0.209                             | 7.11       | 7.399      | 7.553      | 7.693   | 8.156                   |
| TSGA10  | rRSBudFNjdeFilyNjQ | rs9679602  | 11.51            | 10.98                     | -0.22      | 5.47             | -36.52          | 0.275  | 7.261     | 0.113                             | 7.098      | 7.166      | 7.242      | 7.333   | 7.627                   |
| TSGA10  | 9Gn7IVZiCgrYIK8UUA | rs9679602  | 7.77             | 7.42                      | -0.155     | 2.64             | -36.53          | 0.275  | 7.551     | 0.209                             | 7.11       | 7.399      | 7.553      | 7.693   | 8.156                   |
| TSGA10  | Z1Pjr_Mup6goCe711E | rs9679602  | 5.87             | 5.61                      | -0.116     | 3.06             | -36.52          | 0.275  | 7.16      | 0.065                             | 7.097      | 7.115      | 7.136      | 7.181   | 7.515                   |
| TSGA10  | rRSBudFNjdeFilyNjQ | rs13396584 | 9.92             | 9.47                      | 0.192      | 5.81             | -2.58           | 0.25   | 7.261     | 0.113                             | 7.098      | 7.166      | 7.242      | 7.333   | 7.627                   |
| TSGA10  | 9Gn7IVZiCgrYIK8UUA | rs13396584 | 7.15             | 6.83                      | 0.142      | 2.79             | -2.59           | 0.25   | 7.551     | 0.209                             | 7.11       | 7.399      | 7.553      | 7.693   | 8.156                   |
| TSGA10  | Z1Pjr_Mup6goCe711E | rs13396584 | 5.27             | 5.03                      | 0.103      | 3.15             | -2.58           | 0.25   | 7.16      | 0.065                             | 7.097      | 7.115      | 7.136      | 7.181   | 7.515                   |
| TSGA10  | rRSBudFNjdeFilyNjQ | rs11692699 | 17.64            | 16.82                     | -0.322     | 5.23             | -4.58           | 0.3325 | 7.261     | 0.113                             | 7.098      | 7.166      | 7.242      | 7.333   | 7.627                   |
| TSGA10  | 9Gn7IVZiCgrYIK8UUA | rs11692699 | 15.89            | 15.15                     | -0.302     | 4.18             | -27.38          | 0.3325 | 7.551     | 0.209                             | 7.11       | 7.399      | 7.553      | 7.693   | 8.156                   |
| TSGA10  | Z1Pjr_Mup6goCe711E | rs11692699 | 11.16            | 10.65                     | -0.219     | 5.46             | -4.58           | 0.3325 | 7.16      | 0.065                             | 7.097      | 7.115      | 7.136      | 7.181   | 7.515                   |
| TSGA10  | rRSBudFNjdeFilyNjQ | rs6717729  | 16.46            | 15.70                     | -0.303     | 5.11             | 21.7            | 0.3266 | 7.261     | 0.113                             | 7.098      | 7.166      | 7.242      | 7.333   | 7.627                   |
| TSGA10  | 9Gn7IVZiCgrYIK8UUA | rs6717729  | 16.02            | 15.27                     | -0.304     | 3.66             | -1.1            | 0.3266 | 7.551     | 0.209                             | 7.11       | 7.399      | 7.553      | 7.693   | 8.156                   |
| TSGA10  | Z1Pjr_Mup6goCe711E | rs6717729  | 10.58            | 10.10                     | -0.208     | 5.18             | 21.7            | 0.3266 | 7.16      | 0.065                             | 7.097      | 7.115      | 7.136      | 7.181   | 7.515                   |
| TSGA10  | rRSBudFNjdeFilyNjQ | rs2516835  | 19.98            | 19.04                     | -0.354     | 5.94             | 43.89           | 0.3543 | 7.261     | 0.113                             | 7.098      | 7.166      | 7.242      | 7.333   | 7.627                   |
| TSGA10  | 9Gn7IVZiCgrYIK8UUA | rs2516835  | 18.24            | 17.38                     | -0.339     | 3.88             | 21.09           | 0.3543 | 7.551     | 0.209                             | 7.11       | 7.399      | 7.553      | 7.693   | 8.156                   |
| TSGA10  | Z1Pjr_Mup6goCe711E | rs2516835  | 12.95            | 12.35                     | -0.251     | 5.74             | 43.89           | 0.3543 | 7.16      | 0.065                             | 7.097      | 7.115      | 7.136      | 7.181   | 7.515                   |
| TSGA10  | 9Gn7IVZiCgrYIK8UUA | rs2309582  | 5.01             | 4.80                      | -0.098     | 2.16             | 26.27           | 0.1935 | 7.551     | 0.209                             | 7.11       | 7.399      | 7.553      | 7.693   | 8.156                   |
| TSGA10  | Z1Pjr_Mup6goCe711E | rs2309582  | 4.56             | 4.36                      | -0.089     | 1.93             | 49.06           | 0.1935 | 7.16      | 0.065                             | 7.097      | 7.115      | 7.136      | 7.181   | 7.515                   |
| TSKS    | QV5qUIFx54SEI4JSKI | rs1674139  | 5.26             | 5.03                      | 0.102      | 0.55             | 4.99            | 0.4875 | 7.272     | 0.175                             | 7.105      | 7.145      | 7.21       | 7.339   | 8.146                   |
| TSKS    | QV5qUIFx54SEI4JSKI | rs4802623  | 5.24             | 5.01                      | -0.103     | 0.4              | 23.34           | 0.4623 | 7.272     | 0.175                             | 7.105      | 7.145      | 7.21       | 7.339   | 8.146                   |
| TSKS    | QV5qUIFx54SEI4JSKI | rs17370523 | 10.05            | 9.60                      | -0.2       | 2.38             | 26.59           | 0.23   | 7.272     | 0.175                             | 7.105      | 7.145      | 7.21       | 7.339   | 8.146                   |
| TSKS    | QV5qUIFx54SEI4JSKI | rs2302518  | 6.47             | 6.19                      | -0.131     | 2.36             | 29.63           | 0.13   | 7.272     | 0.175                             | 7.105      | 7.145      | 7.21       | 7.339   | 8.146                   |
| TSPAN14 | HV6oyeqT_3J6nF9wR8 | rs17680430 | 3.42             | 3.28                      | 0.062      | 0.41             | 4.61            | 0.105  | 9.722     | 0.355                             | 8.872      | 9.496      | 9.708      | 9.93    | 10.619                  |
| TSPAN14 | HV6oyeqT_3J6nF9wR8 | rs2343308  | 3.66             | 3.50                      | -0.069     | 0.8              | -32.25          | 0.4325 | 9.722     | 0.355                             | 8.872      | 9.496      | 9.708      | 9.93    | 10.619                  |
| TSPAN14 | HV6oyeqT_3J6nF9wR8 | rs10748526 | 11.59            | 11.06                     | 0.226      | 3.86             | -6.31           | 0.2125 | 9.722     | 0.355                             | 8.872      | 9.496      | 9.708      | 9.93    | 10.619                  |
| TSPAN14 | HV6oyeqT_3J6nF9wR8 | rs11185982 | 8.45             | 8.06                      | -0.168     | 2.87             | 26.24           | 0.1625 | 9.722     | 0.355                             | 8.872      | 9.496      | 9.708      | 9.93    | 10.619                  |
| TSPAN32 | fEhlqmjkxdepLlea0  | rs2521263  | 5.27             | 5.04                      | -0.105     | 1.6              | -14.48          | 0.085  | 7.519     | 0.215                             | 7.13       | 7.366      | 7.481      | 7.658   | 8.305                   |
| TSPAN32 | fEhlqmjkxdepLlea0  | rs2651830  | 4.28             | 4.20                      | 0.084      | 1.42             | -11.01          | 0.1075 | 7.519     | 0.215                             | 7.13       | 7.366      | 7.481      | 7.658   | 8.305                   |
| TSPAN32 | EttfXrXutXUX0BSQ64 | rs2244891  | 3.54             | 3.39                      | -0.069     | 0.57             | -3.89           | 0.2525 | 11.52     | 0.393                             | 10.514     | 11.264     | 11.513     | 11.763  | 13.028                  |
| TSPAN32 | fEhlqmjkxdepLlea0  | rs16928081 | 7.49             | 7.15                      | 0.153      | 2.26             | -2.28           | 0.0854 | 7.519     | 0.215                             | 7.13       | 7.366      | 7.481      | 7.658   | 8.305                   |
| TSPAN32 | fEhlqmjkxdepLlea0  | rs756923   | 8.2              | 7.83                      | 0.165      | 1.34             | -0.58           | 0.1425 | 7.519     | 0.215                             | 7.13       | 7.366      | 7.481      | 7.658   | 8.305                   |
| TSPAN32 | EttfXrXutXUX0BSQ64 | rs756923   | 4.04             | 3.87                      | 0.078      | 0.43             | -0.58           | 0.1425 | 11.52     | 0.393                             | 10.514     | 11.264     | 11.513     | 11.763  | 13.028                  |
| TSPAN32 | fEhlqmjkxdepLlea0  | rs2074021  | 8.2              | 7.83                      | 0.165      | 1.24             | 0.28            | 0.1425 | 7.519     | 0.215                             | 7.13       | 7.366      | 7.481      | 7.658   | 8.305                   |
| TSPAN32 | EttfXrXutXUX0BSQ64 | rs2074021  | 4.04             | 3.87                      | 0.078      | 0.49             | 0.28            | 0.1425 | 11.52     | 0.393                             | 10.514     | 11.264     | 11.513     | 11.763  | 13.028                  |
| TSPAN32 | EttfXrXutXUX0BSQ64 | rs800117   | 3.46             | 3.32                      | 0.065      | 1.28             | 23.36           | 0.1457 | 11.52     | 0.393                             | 10.514     | 11.264     | 11.513     | 11.763  | 13.028                  |
| TSPAN32 | EttfXrXutXUX0BSQ64 | rs800153   | 3.44             | 3.29                      | -0.064     | 1.33             | 34.09           | 0.145  | 11.52     | 0.393                             | 10.514     | 11.264     | 11.513     | 11.763  | 13.028                  |
| TSPAN32 | EttfXrXutXUX0BSQ64 | rs800142   | 3.44             | 3.29                      | 0.064      | 1.33             | 45.64           | 0.145  | 11.52     | 0.393                             | 10.514     | 11.264     | 11.513     | 11.763  | 13.028                  |
| TSPYL5  | xio59f1fk3EAIih70  | rs10101931 | 4.02             | 3.85                      | -0.07      | 2.29             | -47.96          | 0.4775 | 7.402     | 0.142                             | 7.143      | 7.297      | 7.391      | 7.491   | 7.884                   |
| TSPYL5  | xio59f1fk3EAIih70  | rs10105830 | 3.92             | 3.75                      | -0.068     | 2.32             | -46.99          | 0.475  | 7.402     | 0.142                             | 7.143      | 7.297      | 7.391      | 7.491   | 7.884                   |
| TSPYL5  | xio59f1fk3EAIih70  | rs6468543  | 5.09             | 4.87                      | 0.092      | 0.77             | -5.58           | 0.225  | 7.402     | 0.142                             | 7.143      | 7.297      | 7.391      | 7.491   | 7.884                   |
| TSSC1   | oknf6K4du9SujV3eog | rs13022433 | 3.75             | 3.59                      | -0.071     | 1.88             | -0.41           | 0.215  | 9.453     | 0.296                             | 8.656      | 9.266      | 9.5        | 9.665   | 10.108                  |
| TTC10   | onVukAiCgucmuMulle | rs7999297  | 4.4              | 4.21                      | 0.095      | 0.24             | -19.04          | 0.4799 | 7.954     | 0.163                             | 7.225      | 7.866      | 7.957      | 8.052   | 8.539                   |
| TTC10   | onVukAiCgucmuMulle | rs6490593  | 4.68             | 4.47                      | 0.093      | 0.05             | -18.45          | 0.2    | 7.954     | 0.163                             | 7.225      | 7.866      | 7.957      | 8.052   | 8.539                   |
| TTC10   | onVukAiCgucmuMulle | rs7998003  | 3.58             | 3.43                      | -0.071     | 0.95             | 17.9            | 0.1975 | 7.954     | 0.163                             | 7.225      | 7.866      | 7.957      | 8.052   | 8.539                   |
| TTC10   | onVukAiCgucmuMulle | rs9509290  | 4.48             | 4.29                      | -0.087     | 0.84             | 18.25           | 0.0675 | 7.954     | 0.163                             | 7.225      | 7.866      | 7.957      | 8.052   | 8.539                   |

| Symbol  | Lumi nuID          | SNP        | Population-based             | Population-based                      | % Variance Explained | Family-based                 | Distance from transcript (kb) | MAF    | Mean  | Transcript abundance (log2 scale) |         |                 |        |                 | SNP mapping under probe |
|---------|--------------------|------------|------------------------------|---------------------------------------|----------------------|------------------------------|-------------------------------|--------|-------|-----------------------------------|---------|-----------------|--------|-----------------|-------------------------|
|         |                    |            | association p-value (-log10) | association p-value (-log10), GC adj. |                      | association p-value (-log10) |                               |        |       | Standard Deviation                | Minimum | 25th percentile | Median | 75th percentile |                         |
| TTC10   | onVukAiCgucmuMulIE | rs7995035  | 3.58                         | 3.43                                  | -0.071               | 0.73                         | 19.5                          | 0.1975 | 7.954 | 0.163                             | 7.225   | 7.866           | 7.957  | 8.052           | 8.539                   |
| TTC10   | onVukAiCgucmuMulIE | rs6490598  | 7.84                         | 7.49                                  | -0.165               | 0.74                         | 23.48                         | 0.28   | 7.954 | 0.163                             | 7.225   | 7.866           | 7.957  | 8.052           | 8.539                   |
| TTC10   | onVukAiCgucmuMulIE | rs2987987  | 3.61                         | 3.46                                  | 0.072                | 0.84                         | 41.61                         | 0.195  | 7.954 | 0.163                             | 7.225   | 7.866           | 7.957  | 8.052           | 8.539                   |
| TTC10   | onVukAiCgucmuMulIE | rs9506528  | 6.15                         | 5.88                                  | 0.132                | 0.38                         | 47.13                         | 0.4724 | 7.954 | 0.163                             | 7.225   | 7.866           | 7.957  | 8.052           | 8.539                   |
| TTC10   | onVukAiCgucmuMulIE | rs9509301  | 6.5                          | 6.21                                  | 0.139                | 0.33                         | 50.67                         | 0.475  | 7.954 | 0.163                             | 7.225   | 7.866           | 7.957  | 8.052           | 8.539                   |
| TTC10   | onVukAiCgucmuMulIE | rs9509303  | 6.63                         | 6.34                                  | 0.142                | 0.41                         | 53.74                         | 0.4775 | 7.954 | 0.163                             | 7.225   | 7.866           | 7.957  | 8.052           | 8.539                   |
| TTC10   | onVukAiCgucmuMulIE | rs9509307  | 7.89                         | 7.54                                  | 0.167                | 0.67                         | -60.31                        | 0.2764 | 7.954 | 0.163                             | 7.225   | 7.866           | 7.957  | 8.052           | 8.539                   |
| TTC10   | onVukAiCgucmuMulIE | rs9509311  | 6.64                         | 6.34                                  | -0.143               | 0.37                         | -55.87                        | 0.4774 | 7.954 | 0.163                             | 7.225   | 7.866           | 7.957  | 8.052           | 8.539                   |
| TTC10   | onVukAiCgucmuMulIE | rs2480425  | 3.58                         | 3.43                                  | 0.071                | 0.95                         | -55.79                        | 0.1975 | 7.954 | 0.163                             | 7.225   | 7.866           | 7.957  | 8.052           | 8.539                   |
| TTC10   | onVukAiCgucmuMulIE | rs2497497  | 3.58                         | 3.43                                  | 0.071                | 0.89                         | -44.62                        | 0.1975 | 7.954 | 0.163                             | 7.225   | 7.866           | 7.957  | 8.052           | 8.539                   |
| TTC10   | onVukAiCgucmuMulIE | rs9506533  | 6.63                         | 6.34                                  | -0.142               | 0.28                         | -20.04                        | 0.4775 | 7.954 | 0.163                             | 7.225   | 7.866           | 7.957  | 8.052           | 8.539                   |
| TTC10   | onVukAiCgucmuMulIE | rs9509330  | 6.63                         | 6.34                                  | -0.142               | 0.36                         | -10.98                        | 0.4775 | 7.954 | 0.163                             | 7.225   | 7.866           | 7.957  | 8.052           | 8.539                   |
| TTC10   | onVukAiCgucmuMulIE | rs9509356  | 5.15                         | 4.92                                  | 0.108                | 0.58                         | 38.58                         | 0.485  | 7.954 | 0.163                             | 7.225   | 7.866           | 7.957  | 8.052           | 8.539                   |
| TTC16   | BqhUIQI0kAeK_NKF0U | rs3802357  | 7.97                         | 7.61                                  | -0.159               | 4.5                          | 0.3                           | 0.4575 | 7.911 | 0.231                             | 7.379   | 7.74            | 7.894  | 8.055           | 8.973                   |
| TTC16   | BqhUIQI0kAeK_NKF0U | rs13298768 | 7.24                         | 6.92                                  | 0.145                | 4.82                         | -4.14                         | 0.4548 | 7.911 | 0.231                             | 7.379   | 7.74            | 7.894  | 8.055           | 8.973                   |
| TTC16   | BqhUIQI0kAeK_NKF0U | rs482095   | 4.56                         | 4.36                                  | 0.087                | 2.8                          | -0.37                         | 0.425  | 7.911 | 0.231                             | 7.379   | 7.74            | 7.894  | 8.055           | 8.973                   |
| TTC16   | BqhUIQI0kAeK_NKF0U | rs10819305 | 3.48                         | 3.33                                  | -0.066               | 2.99                         | 24.09                         | 0.3869 | 7.911 | 0.231                             | 7.379   | 7.74            | 7.894  | 8.055           | 8.973                   |
| TTC16   | BqhUIQI0kAeK_NKF0U | rs10739694 | 3.36                         | 3.22                                  | -0.064               | 2.15                         | 32.73                         | 0.4271 | 7.911 | 0.231                             | 7.379   | 7.74            | 7.894  | 8.055           | 8.973                   |
| TTC16   | BqhUIQI0kAeK_NKF0U | rs4836579  | 4.32                         | 4.14                                  | -0.082               | 2.03                         | 34.67                         | 0.4447 | 7.911 | 0.231                             | 7.379   | 7.74            | 7.894  | 8.055           | 8.973                   |
| TTC16   | BqhUIQI0kAeK_NKF0U | rs10760500 | 3.88                         | 3.74                                  | 0.074                | 1.98                         | 42.84                         | 0.4425 | 7.911 | 0.231                             | 7.379   | 7.74            | 7.894  | 8.055           | 8.973                   |
| TTC19   | Nol_Fe_s5e6q6juLqE | rs1045599  | 3.59                         | 3.44                                  | 0.068                | 1.1                          | -22.87                        | 0.3475 | 9.797 | 0.327                             | 8.854   | 9.571           | 9.789  | 9.964           | 10.792                  |
| TTC19   | Nol_Fe_s5e6q6juLqE | rs10491104 | 6.21                         | 5.93                                  | 0.125                | 1.43                         | -18.22                        | 0.39   | 9.797 | 0.327                             | 8.854   | 9.571           | 9.789  | 9.964           | 10.792                  |
| TTC19   | Nol_Fe_s5e6q6juLqE | rs8070859  | 3.85                         | 3.68                                  | 0.075                | 1.04                         | -14.99                        | 0.3475 | 9.797 | 0.327                             | 8.854   | 9.571           | 9.789  | 9.964           | 10.792                  |
| TTC19   | Nol_Fe_s5e6q6juLqE | rs2302415  | 3.88                         | 3.72                                  | 0.076                | 1.07                         | 3.61                          | 0.345  | 9.797 | 0.327                             | 8.854   | 9.571           | 9.789  | 9.964           | 10.792                  |
| TTC19   | Nol_Fe_s5e6q6juLqE | rs9891938  | 4.07                         | 3.89                                  | 0.081                | 0.91                         | 12.29                         | 0.346  | 9.797 | 0.327                             | 8.854   | 9.571           | 9.789  | 9.964           | 10.792                  |
| TTC19   | Nol_Fe_s5e6q6juLqE | rs11869450 | 3.9                          | 3.74                                  | 0.076                | 0.97                         | -8.39                         | 0.3442 | 9.797 | 0.327                             | 8.854   | 9.571           | 9.789  | 9.964           | 10.792                  |
| TTC19   | Nol_Fe_s5e6q6juLqE | rs2157991  | 4.25                         | 4.06                                  | 0.083                | 0.99                         | 29.86                         | 0.35   | 9.797 | 0.327                             | 8.854   | 9.571           | 9.789  | 9.964           | 10.792                  |
| TTC19   | Nol_Fe_s5e6q6juLqE | rs3785628  | 4.25                         | 4.06                                  | 0.083                | 0.93                         | 38.59                         | 0.35   | 9.797 | 0.327                             | 8.854   | 9.571           | 9.789  | 9.964           | 10.792                  |
| TTC23   | NidFKA4B76RfH1SfU  | rs12324187 | 3.3                          | 3.17                                  | -0.062               | 1.33                         | -39.22                        | 0.4447 | 7.167 | 0.047                             | 7.11    | 7.137           | 7.157  | 7.187           | 7.46                    |
| TTC23   | NidFKA4B76RfH1SfU  | rs2623184  | 3.34                         | 3.20                                  | -0.061               | 0.89                         | -32.77                        | 0.34   | 7.167 | 0.047                             | 7.11    | 7.137           | 7.157  | 7.187           | 7.46                    |
| TTC23   | NidFKA4B76RfH1SfU  | rs8028374  | 4.06                         | 3.88                                  | -0.077               | 1.72                         | 4.45                          | 0.46   | 7.167 | 0.047                             | 7.11    | 7.137           | 7.157  | 7.187           | 7.46                    |
| TTC32   | riQOSV4o.px5MwQSqk | rs11096632 | 5.57                         | 5.32                                  | 0.115                | 2.29                         | 42.62                         | 0.0854 | 9.169 | 0.36                              | 8.031   | 8.925           | 9.164  | 9.391           | 10.178                  |
| TTC39B  | xV6LUhxH0g9KSd9F3o | rs12684860 | 3.56                         | 3.41                                  | 0.068                | 1.09                         | 38.89                         | 0.165  | 8.66  | 0.326                             | 7.947   | 8.42            | 8.694  | 8.883           | 9.485                   |
| TTC39B  | xV6LUhxH0g9KSd9F3o | rs10810367 | 7.46                         | 7.13                                  | -0.144               | 3.04                         | -37                           | 0.3075 | 8.66  | 0.326                             | 7.947   | 8.42            | 8.694  | 8.883           | 9.485                   |
| TTC39B  | xV6LUhxH0g9KSd9F3o | rs2890998  | 19.27                        | 18.37                                 | -0.352               | 5.12                         | -20.8                         | 0.37   | 8.66  | 0.326                             | 7.947   | 8.42            | 8.694  | 8.883           | 9.485                   |
| TTC39B  | xV6LUhxH0g9KSd9F3o | rs10810368 | 15.8                         | 15.07                                 | -0.296               | 5.53                         | -20.5                         | 0.415  | 8.66  | 0.326                             | 7.947   | 8.42            | 8.694  | 8.883           | 9.485                   |
| TTC39B  | xV6LUhxH0g9KSd9F3o | rs1122677  | 20.37                        | 19.41                                 | 0.37                 | 5.41                         | -17.3                         | 0.375  | 8.66  | 0.326                             | 7.947   | 8.42            | 8.694  | 8.883           | 9.485                   |
| TTC39B  | xV6LUhxH0g9KSd9F3o | rs17327373 | 19.85                        | 18.92                                 | -0.36                | 5.15                         | -12.91                        | 0.35   | 8.66  | 0.326                             | 7.947   | 8.42            | 8.694  | 8.883           | 9.485                   |
| TTC39B  | xV6LUhxH0g9KSd9F3o | rs4741484  | 22.62                        | 21.55                                 | 0.405                | 4.92                         | -11.12                        | 0.397  | 8.66  | 0.326                             | 7.947   | 8.42            | 8.694  | 8.883           | 9.485                   |
| TTC39B  | xV6LUhxH0g9KSd9F3o | rs10961965 | 19.4                         | 18.49                                 | -0.351               | 5.08                         | -10.89                        | 0.35   | 8.66  | 0.326                             | 7.947   | 8.42            | 8.694  | 8.883           | 9.485                   |
| TTC39B  | xV6LUhxH0g9KSd9F3o | rs11792305 | 28.72                        | 27.36                                 | -0.481               | 6.64                         | -7.65                         | 0.4875 | 8.66  | 0.326                             | 7.947   | 8.42            | 8.694  | 8.883           | 9.485                   |
| TTC39B  | xV6LUhxH0g9KSd9F3o | rs4008004  | 15.05                        | 14.35                                 | 0.284                | 4.83                         | -6.28                         | 0.245  | 8.66  | 0.326                             | 7.947   | 8.42            | 8.694  | 8.883           | 9.485                   |
| TTC39B  | xV6LUhxH0g9KSd9F3o | rs2849049  | 17.54                        | 16.72                                 | 0.323                | 4.14                         | -5.82                         | 0.3975 | 8.66  | 0.326                             | 7.947   | 8.42            | 8.694  | 8.883           | 9.485                   |
| TTC39B  | xV6LUhxH0g9KSd9F3o | rs491322   | 9.9                          | 9.45                                  | -0.196               | 3.08                         | 0.91                          | 0.445  | 8.66  | 0.326                             | 7.947   | 8.42            | 8.694  | 8.883           | 9.485                   |
| TTC39B  | xV6LUhxH0g9KSd9F3o | rs2616752  | 5.71                         | 5.46                                  | -0.116               | 1.33                         | 3.46                          | 0.3825 | 8.66  | 0.326                             | 7.947   | 8.42            | 8.694  | 8.883           | 9.485                   |
| TTC39B  | xV6LUhxH0g9KSd9F3o | rs12554359 | 4.7                          | 4.50                                  | 0.091                | 1.04                         | 23.39                         | 0.2225 | 8.66  | 0.326                             | 7.947   | 8.42            | 8.694  | 8.883           | 9.485                   |
| TTC39B  | xV6LUhxH0g9KSd9F3o | rs10124733 | 3.57                         | 3.42                                  | 0.068                | 0.57                         | 25.76                         | 0.3075 | 8.66  | 0.326                             | 7.947   | 8.42            | 8.694  | 8.883           | 9.485                   |
| TTYH2   | NdcXxfzXoXrTeXT5c  | rs12600564 | 4.46                         | 4.26                                  | 0.09                 | 1.95                         | -9.65                         | 0.1371 | 7.163 | 0.038                             | 7.107   | 7.136           | 7.154  | 7.183           | 7.329                   |
| TUSC3   | QY76ACGjD_XLqPqXro | rs10104063 | 5.14                         | 4.92                                  | -0.102               | 1.25                         | -56.87                        | 0.1809 | 7.139 | 0.085                             | 7.097   | 7.109           | 7.121  | 7.136           | 7.9                     |
| TUSC3   | xeh.i4gjuP6FOkfAB0 | rs10109890 | 3.67                         | 3.52                                  | -0.069               | 0.94                         | -50.81                        | 0.3575 | 7.119 | 0.013                             | 7.098   | 7.111           | 7.117  | 7.125           | 7.168                   |
| TUSC3   | QY76ACGjD_XLqPqXro | rs918245   | 4.24                         | 4.06                                  | -0.08                | 0.97                         | -25.91                        | 0.135  | 7.139 | 0.085                             | 7.097   | 7.109           | 7.121  | 7.136           | 7.9                     |
| TUSC3   | xeh.i4gjuP6FOkfAB0 | rs352775   | 3.4                          | 3.26                                  | 0.063                | 2.22                         | 13.77                         | 0.42   | 7.119 | 0.013                             | 7.098   | 7.111           | 7.117  | 7.125           | 7.168                   |
| TXNDC13 | uqX6sylnkSC01SV3g0 | rs2076015  | 6.5                          | 6.21                                  | 0.13                 | 1.38                         | 1.33                          | 0.08   | 8.612 | 0.233                             | 7.871   | 8.481           | 8.612  | 8.783           | 9.138                   |
| TXNDC13 | uqX6sylnkSC01SV3g0 | rs6140484  | 4.85                         | 4.64                                  | -0.095               | 0.85                         | 5.29                          | 0.0825 | 8.612 | 0.233                             | 7.871   | 8.481           | 8.612  | 8.783           | 9.138                   |
| TXNDC13 | uqX6sylnkSC01SV3g0 | rs6133527  | 6.42                         | 6.13                                  | -0.13                | 1.72                         | -2.24                         | 0.1122 | 8.612 | 0.233                             | 7.871   | 8.481           | 8.612  | 8.783           | 9.138                   |
| TXNDC13 | uqX6sylnkSC01SV3g0 | rs6133529  | 5.13                         | 4.90                                  | -0.101               | 0.8                          | 17.76                         | 0.085  | 8.612 | 0.233                             | 7.871   | 8.481           | 8.612  | 8.783           | 9.138                   |
| TXNDC13 | uqX6sylnkSC01SV3g0 | rs6133536  | 5.17                         | 4.94                                  | -0.103               | 1.34                         | 38.28                         | 0.1225 | 8.612 | 0.233                             | 7.871   | 8.481           | 8.612  | 8.783           | 9.138                   |
| TXNDC13 | uqX6sylnkSC01SV3g0 | rs6055504  | 3.86                         | 3.70                                  | 0.073                | 1.76                         | 40.58                         | 0.27   | 8.612 | 0.233                             | 7.871   | 8.481           | 8.612  | 8.783           | 9.138                   |
| TXNDC13 | uqX6sylnkSC01SV3g0 | rs6118046  | 4.16                         | 3.99                                  | 0.08                 | 1.37                         | 45.48                         | 0.16   | 8.612 | 0.233                             | 7.871   | 8.481           | 8.612  | 8.783           | 9.138                   |
| TYW1    | 6qXfVfFaV8j9OISUfI | rs11761516 | 9.7                          | 9.26                                  | 0.177                | 1.75                         | 63.7                          | 0.245  | 8.632 | 0.238                             | 7.211   | 8.491           | 8.624  | 8.738           | 9.429                   |
| TYW1    | 6qXfVfFaV8j9OISUfI | rs7780458  | 8.3                          | 7.92                                  | -0.15                | 2.28                         | 68.59                         | 0.295  | 8.632 | 0.238                             | 7.211   | 8.491           | 8.624  | 8.738           | 9.429                   |
| TYW1    | 6qXfVfFaV8j9OISUfI | rs4717354  | 8.59                         | 8.20                                  | 0.159                | 1.65                         | -48.72                        | 0.27   | 8.632 | 0.238                             | 7.211   | 8.491           | 8.624  | 8.738           | 9.429                   |

| Symbol  | Lumi nuID           | SNP        | Population-based             | Population-based                      | % Variance Explained | Family-based                 | Distance from transcript (kb) | MAF    | Mean   | Transcript abundance (log2 scale) |         |                 |        |                 | SNP mapping under probe |
|---------|---------------------|------------|------------------------------|---------------------------------------|----------------------|------------------------------|-------------------------------|--------|--------|-----------------------------------|---------|-----------------|--------|-----------------|-------------------------|
|         |                     |            | association p-value (-log10) | association p-value (-log10), GC adj. |                      | association p-value (-log10) |                               |        |        | Standard Deviation                | Minimum | 25th percentile | Median | 75th percentile |                         |
| TYW1    | 6qXfVfFaV8j9OiSufl  | rs6954642  | 8.59                         | 8.20                                  | -0.159               | 1.65                         | -32.05                        | 0.27   | 8.632  | 0.238                             | 7.211   | 8.491           | 8.624  | 8.738           | 9.429                   |
| TYW1    | 6qXfVfFaV8j9OiSufl  | rs12155193 | 7.74                         | 7.40                                  | 0.144                | 1.85                         | -16.29                        | 0.325  | 8.632  | 0.238                             | 7.211   | 8.491           | 8.624  | 8.738           | 9.429                   |
| U2AF1L3 | uIfR3XIU19Up1anUw7A | rs2871921  | 3.84                         | 3.68                                  | 0.076                | 1.34                         | -1.01                         | 0.1533 | 9.542  | 0.361                             | 8.756   | 9.295           | 9.534  | 9.776           | 10.727                  |
| UBE2F   | WYO_leXl77gl1SDkyl  | rs4302179  | 4.69                         | 4.48                                  | 0.09                 | 2.82                         | -24.26                        | 0.455  | 10.266 | 0.254                             | 9.555   | 10.074          | 10.265 | 10.449          | 10.899                  |
| UBE2F   | WYO_leXl77gl1SDkyl  | rs1446927  | 5.92                         | 5.66                                  | 0.111                | 3.71                         | -8.64                         | 0.245  | 10.266 | 0.254                             | 9.555   | 10.074          | 10.265 | 10.449          | 10.899                  |
| UBE2F   | WYO_leXl77gl1SDkyl  | rs921095   | 7.44                         | 7.11                                  | -0.144               | 3.89                         | 17.66                         | 0.4015 | 10.266 | 0.254                             | 9.555   | 10.074          | 10.265 | 10.449          | 10.899                  |
| UBE2F   | WYO_leXl77gl1SDkyl  | rs10929262 | 7.44                         | 7.11                                  | 0.143                | 3.75                         | 36.42                         | 0.4025 | 10.266 | 0.254                             | 9.555   | 10.074          | 10.265 | 10.449          | 10.899                  |
| UBE2F   | WYO_leXl77gl1SDkyl  | rs2326007  | 5.86                         | 5.60                                  | 0.112                | 3.16                         | -30.23                        | 0.1827 | 10.266 | 0.254                             | 9.555   | 10.074          | 10.265 | 10.449          | 10.899                  |
| UBE2F   | WYO_leXl77gl1SDkyl  | rs2121473  | 5.79                         | 5.54                                  | 0.109                | 3.32                         | -27.04                        | 0.18   | 10.266 | 0.254                             | 9.555   | 10.074          | 10.265 | 10.449          | 10.899                  |
| UBE2F   | WYO_leXl77gl1SDkyl  | rs6713132  | 5.79                         | 5.54                                  | -0.109               | 3.32                         | -16.15                        | 0.18   | 10.266 | 0.254                             | 9.555   | 10.074          | 10.265 | 10.449          | 10.899                  |
| UBE2F   | WYO_leXl77gl1SDkyl  | rs6729218  | 5.79                         | 5.54                                  | -0.109               | 3.32                         | -6.32                         | 0.18   | 10.266 | 0.254                             | 9.555   | 10.074          | 10.265 | 10.449          | 10.899                  |
| UBE2F   | WYO_leXl77gl1SDkyl  | rs821480   | 5.24                         | 5.01                                  | -0.098               | 3.06                         | 22.14                         | 0.18   | 10.266 | 0.254                             | 9.555   | 10.074          | 10.265 | 10.449          | 10.899                  |
| UBE2F   | WYO_leXl77gl1SDkyl  | rs3210400  | 7.26                         | 6.94                                  | -0.139               | 2.88                         | 39.7                          | 0.4167 | 10.266 | 0.254                             | 9.555   | 10.074          | 10.265 | 10.449          | 10.899                  |
| UBE2F   | WYO_leXl77gl1SDkyl  | rs17069    | 5.22                         | 4.99                                  | 0.098                | 2.82                         | 49.41                         | 0.2325 | 10.266 | 0.254                             | 9.555   | 10.074          | 10.265 | 10.449          | 10.899                  |
| UBE2F   | WYO_leXl77gl1SDkyl  | rs3739055  | 5.16                         | 4.94                                  | 0.098                | 3.25                         | 49.5                          | 0.46   | 10.266 | 0.254                             | 9.555   | 10.074          | 10.265 | 10.449          | 10.899                  |
| UBE2Z   | xqfqgaC.N_jfgingq0  | rs882150   | 3.77                         | 3.61                                  | 0.072                | 0.16                         | -39.22                        | 0.46   | 9.566  | 0.252                             | 8.723   | 9.435           | 9.597  | 9.722           | 10.372                  |
| UBE2Z   | xqfqgaC.N_jfgingq0  | rs12941604 | 4.39                         | 4.20                                  | -0.084               | 1.43                         | 0.6                           | 0.1625 | 9.566  | 0.252                             | 8.723   | 9.435           | 9.597  | 9.722           | 10.372                  |
| UBE3B   | N1TXD.zReCvoFLioeo  | rs2241209  | 4.11                         | 3.93                                  | 0.077                | 1.06                         | -11.99                        | 0.1025 | 8.789  | 0.268                             | 8.083   | 8.597           | 8.751  | 8.978           | 9.619                   |
| UBE3B   | N1TXD.zReCvoFLioeo  | rs2241206  | 3.46                         | 3.32                                  | 0.064                | 2.84                         | -5.66                         | 0.1825 | 8.789  | 0.268                             | 8.083   | 8.597           | 8.751  | 8.978           | 9.619                   |
| UBPH    | x6VKleFQLgoT5aikXk  | rs727238   | 4.77                         | 4.56                                  | -0.089               | 1.33                         | -47.33                        | 0.19   | 7.711  | 0.154                             | 7.333   | 7.606           | 7.696  | 7.81            | 8.227                   |
| UBPH    | x6VKleFQLgoT5aikXk  | rs4967958  | 5.29                         | 5.06                                  | 0.104                | 1.09                         | -40.27                        | 0.165  | 7.711  | 0.154                             | 7.333   | 7.606           | 7.696  | 7.81            | 8.227                   |
| UBPH    | x6VKleFQLgoT5aikXk  | rs6497671  | 5.58                         | 5.34                                  | 0.109                | 1.68                         | -31.71                        | 0.15   | 7.711  | 0.154                             | 7.333   | 7.606           | 7.696  | 7.81            | 8.227                   |
| UCP2    | IKdX3iXdeeeF40Xen8  | rs2306820  | 4.09                         | 3.91                                  | 0.079                | 1.77                         | -4.37                         | 0.3225 | 11.701 | 0.637                             | 9.244   | 11.303          | 11.719 | 12.093          | 13.459                  |
| UCP2    | IKdX3iXdeeeF40Xen8  | rs668514   | 3.65                         | 3.49                                  | -0.07                | 2.04                         | 12.62                         | 0.255  | 11.701 | 0.637                             | 9.244   | 11.303          | 11.719 | 12.093          | 13.459                  |
| UCRC    | le5TV4X6FZeKrhLosg  | rs14115    | 6.26                         | 5.98                                  | 0.125                | 1.91                         | 0.17                          | 0.0578 | 8.651  | 0.32                              | 7.871   | 8.398           | 8.641  | 8.879           | 9.856                   |
| UFD1L   | 0_qAhAie1eKI7lyeXU  | rs13447270 | 3.78                         | 3.62                                  | 0.072                | 0.98                         | 34.64                         | 0.17   | 7.62   | 0.13                              | 7.335   | 7.523           | 7.62   | 7.69            | 8.375                   |
| UGCG    | 9CeiB62cSPGe6qxJlo  | rs7860334  | 3.3                          | 3.16                                  | -0.062               | 3.27                         | 4.43                          | 0.085  | 9.56   | 0.428                             | 8.464   | 9.277           | 9.511  | 9.638           | 10.942                  |
| UMPS    | uSUS17eryrUT_KNfU   | rs1162     | 4.82                         | 4.61                                  | 0.094                | 1.5                          | -9.53                         | 0.31   | 7.278  | 0.093                             | 7.106   | 7.21            | 7.272  | 7.335           | 7.589                   |
| UMPS    | uSUS17eryrUT_KNfU   | rs13146    | 3.59                         | 3.44                                  | 0.066                | 1.05                         | -0.82                         | 0.1675 | 7.278  | 0.093                             | 7.106   | 7.21            | 7.272  | 7.335           | 7.589                   |
| UMPS    | uSUS17eryrUT_KNfU   | rs614664   | 4.81                         | 4.60                                  | -0.09                | 0.66                         | 23.36                         | 0.3575 | 7.278  | 0.093                             | 7.106   | 7.21            | 7.272  | 7.335           | 7.589                   |
| UNC5C   | IRKQg5JKJSCgBlixBSU | rs17381177 | 3.32                         | 3.18                                  | -0.062               | 0.22                         | -104.94                       | 0.0575 | 7.109  | 0.01                              | 7.093   | 7.103           | 7.107  | 7.113           | 7.188                   |
| UNQ3033 | rrN3dhplVUKLhc54nA  | rs612529   | 3.55                         | 3.40                                  | -0.068               | 3.12                         | 0.05                          | 0.2096 | 7.66   | 0.542                             | 7.118   | 7.251           | 7.538  | 7.839           | 10.174                  |
| UPB1    | fgPeXihJUufpiL14Q   | rs5760425  | 22.27                        | 21.22                                 | 0.388                | 4.94                         | -48.8                         | 0.35   | 7.412  | 0.183                             | 7.177   | 7.291           | 7.381  | 7.484           | 8.805                   |
| UPB1    | fgPeXihJUufpiL14Q   | rs1008931  | 22.27                        | 21.22                                 | 0.388                | 5.34                         | -35.71                        | 0.35   | 7.412  | 0.183                             | 7.177   | 7.291           | 7.381  | 7.484           | 8.805                   |
| UPB1    | fgPeXihJUufpiL14Q   | rs738813   | 22.27                        | 21.22                                 | -0.388               | 5.09                         | -28.51                        | 0.3475 | 7.412  | 0.183                             | 7.177   | 7.291           | 7.381  | 7.484           | 8.805                   |
| UPB1    | fgPeXihJUufpiL14Q   | rs5760452  | 22.33                        | 21.27                                 | -0.389               | 5.41                         | -6.03                         | 0.3475 | 7.412  | 0.183                             | 7.177   | 7.291           | 7.381  | 7.484           | 8.805                   |
| UPB1    | fgPeXihJUufpiL14Q   | rs3788372  | 12.41                        | 11.84                                 | 0.236                | 2.53                         | 3.6                           | 0.3693 | 7.412  | 0.183                             | 7.177   | 7.291           | 7.381  | 7.484           | 8.805                   |
| UPB1    | fgPeXihJUufpiL14Q   | rs738814   | 10.06                        | 9.60                                  | 0.191                | 2.28                         | 11.36                         | 0.4    | 7.412  | 0.183                             | 7.177   | 7.291           | 7.381  | 7.484           | 8.805                   |
| UPB1    | fgPeXihJUufpiL14Q   | rs6004171  | 10.71                        | 10.22                                 | 0.202                | 2.4                          | -10.32                        | 0.3775 | 7.412  | 0.183                             | 7.177   | 7.291           | 7.381  | 7.484           | 8.805                   |
| UPB1    | fgPeXihJUufpiL14Q   | rs1314     | 4.01                         | 3.83                                  | -0.078               | 1.57                         | -0.1                          | 0.1675 | 7.412  | 0.183                             | 7.177   | 7.291           | 7.381  | 7.484           | 8.805                   |
| UPF3A   | ulyDNeS6yL_dT1IlyU  | rs7994556  | 3.62                         | 3.46                                  | 0.068                | 2.94                         | -49                           | 0.24   | 9.037  | 0.372                             | 7.582   | 8.779           | 9.062  | 9.296           | 9.899                   |
| UPF3A   | ulyDNeS6yL_dT1IlyU  | rs7994573  | 3.42                         | 3.27                                  | -0.064               | 2.48                         | -38.69                        | 0.2375 | 9.037  | 0.372                             | 7.582   | 8.779           | 9.062  | 9.296           | 9.899                   |
| UPF3A   | ulyDNeS6yL_dT1IlyU  | rs9314907  | 3.62                         | 3.46                                  | 0.068                | 2.94                         | -31.91                        | 0.24   | 9.037  | 0.372                             | 7.582   | 8.779           | 9.062  | 9.296           | 9.899                   |
| UPF3A   | ulyDNeS6yL_dT1IlyU  | rs7319446  | 3.62                         | 3.46                                  | -0.068               | 2.94                         | -17.92                        | 0.24   | 9.037  | 0.372                             | 7.582   | 8.779           | 9.062  | 9.296           | 9.899                   |
| UPF3A   | ulyDNeS6yL_dT1IlyU  | rs9590409  | 3.52                         | 3.37                                  | -0.066               | 2.94                         | -6.58                         | 0.2375 | 9.037  | 0.372                             | 7.582   | 8.779           | 9.062  | 9.296           | 9.899                   |
| UPF3A   | ulyDNeS6yL_dT1IlyU  | rs9314909  | 3.62                         | 3.46                                  | -0.068               | 2.48                         | -4.06                         | 0.24   | 9.037  | 0.372                             | 7.582   | 8.779           | 9.062  | 9.296           | 9.899                   |
| UROS    | 3uRuHid7oJsfAVyV7g  | rs10510149 | 3.77                         | 3.61                                  | -0.075               | 0.16                         | -15.96                        | 0.445  | 10.704 | 0.302                             | 9.859   | 10.51           | 10.695 | 10.884          | 11.77                   |
| UROS    | 3uRuHid7oJsfAVyV7g  | rs10794024 | 3.77                         | 3.61                                  | -0.075               | 0.16                         | -15.16                        | 0.445  | 10.704 | 0.302                             | 9.859   | 10.51           | 10.695 | 10.884          | 11.77                   |
| UROS    | 3uRuHid7oJsfAVyV7g  | rs12356233 | 3.65                         | 3.50                                  | -0.072               | 0.39                         | 23.16                         | 0.435  | 10.704 | 0.302                             | 9.859   | 10.51           | 10.695 | 10.884          | 11.77                   |
| USF1    | WioKO.JLp65U4ioj6U  | rs11576837 | 4.02                         | 3.85                                  | 0.08                 | 2.92                         | -5.17                         | 0.3775 | 9.307  | 0.416                             | 7.922   | 9.047           | 9.299  | 9.556           | 10.629                  |
| USF1    | WioKO.JLp65U4ioj6U  | rs2774279  | 6.02                         | 5.75                                  | 0.121                | 2.45                         | 1.8                           | 0.3325 | 9.307  | 0.416                             | 7.922   | 9.047           | 9.299  | 9.556           | 10.629                  |
| USF1    | WioKO.JLp65U4ioj6U  | rs4656978  | 3.52                         | 3.37                                  | -0.066               | 1.99                         | 28.01                         | 0.2475 | 9.307  | 0.416                             | 7.922   | 9.047           | 9.299  | 9.556           | 10.629                  |
| USF1    | WioKO.JLp65U4ioj6U  | rs3892375  | 5.76                         | 5.51                                  | -0.115               | 2.51                         | 38.3                          | 0.2575 | 9.307  | 0.416                             | 7.922   | 9.047           | 9.299  | 9.556           | 10.629                  |
| USMG5   | cm2tusjKa05MYP9J34  | rs11191666 | 40.21                        | 38.28                                 | 0.621                | 7.27                         | -21.54                        | 0.4275 | 7.972  | 0.617                             | 7.135   | 7.392           | 8.065  | 8.46            | 9.287                   |
| USMG5   | cm2tusjKa05MYP9J34  | rs3740382  | 30.52                        | 29.06                                 | 0.508                | 5.57                         | 22.99                         | 0.425  | 7.972  | 0.617                             | 7.135   | 7.392           | 8.065  | 8.46            | 9.287                   |
| USMG5   | cm2tusjKa05MYP9J34  | rs11191686 | 30.13                        | 28.70                                 | -0.5                 | 5.89                         | 31.52                         | 0.4225 | 7.972  | 0.617                             | 7.135   | 7.392           | 8.065  | 8.46            | 9.287                   |
| USMG5   | cm2tusjKa05MYP9J34  | rs11191688 | 27.68                        | 26.36                                 | 0.471                | 5.28                         | 36.35                         | 0.4375 | 7.972  | 0.617                             | 7.135   | 7.392           | 8.065  | 8.46            | 9.287                   |
| USMG5   | cm2tusjKa05MYP9J34  | rs2986014  | 24.49                        | 23.33                                 | 0.432                | 4.84                         | 37.86                         | 0.4575 | 7.972  | 0.617                             | 7.135   | 7.392           | 8.065  | 8.46            | 9.287                   |
| USMG5   | cm2tusjKa05MYP9J34  | rs10883868 | 27.32                        | 26.03                                 | -0.464               | 5.37                         | 40.59                         | 0.435  | 7.972  | 0.617                             | 7.135   | 7.392           | 8.065  | 8.46            | 9.287                   |
| USMG5   | cm2tusjKa05MYP9J34  | rs2281860  | 23.94                        | 22.81                                 | 0.426                | 5.99                         | 45.35                         | 0.452  | 7.972  | 0.617                             | 7.135   | 7.392           | 8.065  | 8.46            | 9.287                   |
| USP30   | 96iUIvRFAUp1eBLXs   | rs10774961 | 3.36                         | 3.22                                  | 0.063                | 1.68                         | -6.05                         | 0.4848 | 7.302  | 0.093                             | 7.112   | 7.242           | 7.289  | 7.356           | 7.675                   |
| USP36   | 3SJ_qf3p530_F7u9Uk  | rs7218899  | 16.14                        | 15.38                                 | 0.292                | 4.04                         | -43.7                         | 0.4625 | 9.436  | 0.561                             | 7.999   | 9.044           | 9.48   | 9.832           | 11.028                  |

| Symbol | Lumi nuID          | SNP        | Population-based association |         | % Variance Explained | Family-based association |        | Distance from transcript (kb) | MAF    | Transcript abundance (log2 scale) |         |                 |        |                 |         | SNP mapping under probe |
|--------|--------------------|------------|------------------------------|---------|----------------------|--------------------------|--------|-------------------------------|--------|-----------------------------------|---------|-----------------|--------|-----------------|---------|-------------------------|
|        |                    |            | p-value (-log10)             | GC adj. |                      | p-value (-log10)         | Mean   |                               |        | Standard Deviation                | Minimum | 25th percentile | Median | 75th percentile | Maximum |                         |
| USP36  | 3SJ_qf3p530_F7u9Uk | rs6501243  | 16.31                        | 15.55   | -0.299               | 4.33                     | -38.99 | 0.4475                        | 9.436  | 0.561                             | 7.999   | 9.044           | 9.48   | 9.832           | 11.028  |                         |
| USP36  | 3SJ_qf3p530_F7u9Uk | rs7221314  | 7.98                         | 7.62    | 0.156                | 2.99                     | -25.3  | 0.365                         | 9.436  | 0.561                             | 7.999   | 9.044           | 9.48   | 9.832           | 11.028  |                         |
| USP36  | 3SJ_qf3p530_F7u9Uk | rs16971682 | 8.61                         | 8.22    | -0.164               | 3.1                      | -15.56 | 0.38                          | 9.436  | 0.561                             | 7.999   | 9.044           | 9.48   | 9.832           | 11.028  |                         |
| USP36  | 3SJ_qf3p530_F7u9Uk | rs747423   | 8.29                         | 7.92    | -0.164               | 2.05                     | 1.23   | 0.2513                        | 9.436  | 0.561                             | 7.999   | 9.044           | 9.48   | 9.832           | 11.028  |                         |
| USP36  | 3SJ_qf3p530_F7u9Uk | rs1044486  | 18.64                        | 17.77   | -0.332               | 4.81                     | 8.63   | 0.4425                        | 9.436  | 0.561                             | 7.999   | 9.044           | 9.48   | 9.832           | 11.028  |                         |
| USP36  | 3SJ_qf3p530_F7u9Uk | rs2279308  | 21.02                        | 20.03   | 0.368                | 4.19                     | 11.43  | 0.39                          | 9.436  | 0.561                             | 7.999   | 9.044           | 9.48   | 9.832           | 11.028  |                         |
| USP36  | 3SJ_qf3p530_F7u9Uk | rs2054624  | 5.4                          | 5.16    | -0.103               | 0.74                     | 18.55  | 0.1658                        | 9.436  | 0.561                             | 7.999   | 9.044           | 9.48   | 9.832           | 11.028  |                         |
| USP36  | 3SJ_qf3p530_F7u9Uk | rs4796817  | 5.17                         | 4.94    | -0.097               | 0.7                      | 19.1   | 0.2025                        | 9.436  | 0.561                             | 7.999   | 9.044           | 9.48   | 9.832           | 11.028  |                         |
| USP36  | 3SJ_qf3p530_F7u9Uk | rs1110274  | 15.38                        | 14.66   | -0.277               | 2.65                     | -26.58 | 0.4575                        | 9.436  | 0.561                             | 7.999   | 9.044           | 9.48   | 9.832           | 11.028  |                         |
| USP36  | 3SJ_qf3p530_F7u9Uk | rs7218605  | 15.3                         | 14.59   | 0.276                | 2.6                      | -25.06 | 0.4573                        | 9.436  | 0.561                             | 7.999   | 9.044           | 9.48   | 9.832           | 11.028  |                         |
| USP36  | 3SJ_qf3p530_F7u9Uk | rs11658299 | 5.88                         | 5.62    | -0.109               | 1.37                     | -11.14 | 0.4875                        | 9.436  | 0.561                             | 7.999   | 9.044           | 9.48   | 9.832           | 11.028  |                         |
| USP36  | 3SJ_qf3p530_F7u9Uk | rs7213204  | 15.75                        | 15.02   | -0.285               | 3.13                     | -5.06  | 0.425                         | 9.436  | 0.561                             | 7.999   | 9.044           | 9.48   | 9.832           | 11.028  |                         |
| USP36  | 3SJ_qf3p530_F7u9Uk | rs4352096  | 15.85                        | 15.11   | -0.289               | 4                        | -2.95  | 0.45                          | 9.436  | 0.561                             | 7.999   | 9.044           | 9.48   | 9.832           | 11.028  |                         |
| USP53  | ipBEUB7U1J10HBj.Sk | rs11737086 | 3.34                         | 3.20    | -0.068               | 2.01                     | -33.8  | 0.355                         | 7.612  | 0.306                             | 7.116   | 7.403           | 7.56   | 7.787           | 8.533   |                         |
| USP53  | ipBEUB7U1J10HBj.Sk | rs13113462 | 11.32                        | 10.80   | 0.225                | 1.43                     | -20.82 | 0.1675                        | 7.612  | 0.306                             | 7.116   | 7.403           | 7.56   | 7.787           | 8.533   |                         |
| USP53  | ipBEUB7U1J10HBj.Sk | rs1052633  | 4.72                         | 4.51    | 0.093                | 0.79                     | 0.98   | 0.4724                        | 7.612  | 0.306                             | 7.116   | 7.403           | 7.56   | 7.787           | 8.533   |                         |
| USP53  | ipBEUB7U1J10HBj.Sk | rs1397611  | 11.6                         | 11.07   | -0.232               | 1.94                     | 10.98  | 0.165                         | 7.612  | 0.306                             | 7.116   | 7.403           | 7.56   | 7.787           | 8.533   |                         |
| USP53  | ipBEUB7U1J10HBj.Sk | rs11724758 | 4.47                         | 4.28    | -0.087               | 0.72                     | 25.51  | 0.4675                        | 7.612  | 0.306                             | 7.116   | 7.403           | 7.56   | 7.787           | 8.533   |                         |
| VAMP1  | ITVvfa.IOIY7qv1Hu4 | rs2534721  | 3.81                         | 3.65    | 0.074                | 2.68                     | 0.3    | 0.29                          | 10.469 | 0.526                             | 8.72    | 10.134          | 10.477 | 10.865          | 11.551  |                         |
| VAMP4  | f.DpMKH5PPk8qJq054 | rs11576221 | 6.45                         | 6.16    | 0.126                | 3.63                     | -19.36 | 0.2025                        | 8.693  | 0.411                             | 7.55    | 8.412           | 8.689  | 8.963           | 9.812   |                         |
| VAMP4  | f.DpMKH5PPk8qJq054 | rs1001373  | 6.84                         | 6.53    | -0.132               | 3.85                     | 11.45  | 0.2025                        | 8.693  | 0.411                             | 7.55    | 8.412           | 8.689  | 8.963           | 9.812   |                         |
| VAMP4  | f.DpMKH5PPk8qJq054 | rs3753539  | 5.91                         | 5.65    | 0.113                | 2.79                     | 4.97   | 0.2525                        | 8.693  | 0.411                             | 7.55    | 8.412           | 8.689  | 8.963           | 9.812   |                         |
| VAMP5  | 3TXj7nrbf3V0iS4SQ  | rs10187424 | 3.55                         | 3.40    | 0.067                | 1.17                     | -17.23 | 0.435                         | 10.479 | 0.329                             | 9.074   | 10.27           | 10.5   | 10.713          | 11.545  |                         |
| VAMP5  | 3TXj7nrbf3V0iS4SQ  | rs2121397  | 12.09                        | 11.53   | 0.24                 | 3.58                     | -12.67 | 0.15                          | 10.479 | 0.329                             | 9.074   | 10.27           | 10.5   | 10.713          | 11.545  |                         |
| VAMP5  | 3TXj7nrbf3V0iS4SQ  | rs12714147 | 6.76                         | 6.46    | -0.137               | 2.21                     | 2.3    | 0.1825                        | 10.479 | 0.329                             | 9.074   | 10.27           | 10.5   | 10.713          | 11.545  |                         |
| VAMP5  | 3TXj7nrbf3V0iS4SQ  | rs14976    | 6.57                         | 6.27    | -0.129               | 2.03                     | -1.62  | 0.295                         | 10.479 | 0.329                             | 9.074   | 10.27           | 10.5   | 10.713          | 11.545  |                         |
| VAMP8  | Nunk.fq18i6noiFyKk | rs2028900  | 3.9                          | 3.74    | -0.076               | 2.33                     | -36.98 | 0.47                          | 12.97  | 0.278                             | 12.227  | 12.774          | 12.968 | 13.174          | 13.754  |                         |
| VAMP8  | Nunk.fq18i6noiFyKk | rs10187424 | 3.44                         | 3.30    | 0.066                | 1.62                     | -10.42 | 0.435                         | 12.97  | 0.278                             | 12.227  | 12.774          | 12.968 | 13.174          | 13.754  |                         |
| VAPA   | iKEXILzRGCjhVKodLs | rs513186   | 3.62                         | 3.46    | 0.07                 | 3.33                     | -31.4  | 0.3425                        | 7.34   | 0.097                             | 7.14    | 7.271           | 7.327  | 7.398           | 7.632   |                         |
| VAPA   | iKEXILzRGCjhVKodLs | rs636407   | 3.38                         | 3.24    | 0.065                | 4.13                     | 8.53   | 0.3744                        | 7.34   | 0.097                             | 7.14    | 7.271           | 7.327  | 7.398           | 7.632   |                         |
| VARS2  | KLh7rfiOdE8eVpeXU  | rs2844654  | 6.59                         | 6.30    | -0.128               | 1.69                     | -43.29 | 0.355                         | 9.091  | 0.336                             | 8.3     | 8.928           | 9.074  | 9.293           | 10.114  |                         |
| VARS2  | KLh7rfiOdE8eVpeXU  | rs1264333  | 6.59                         | 6.30    | -0.128               | 1.69                     | -37.67 | 0.355                         | 9.091  | 0.336                             | 8.3     | 8.928           | 9.074  | 9.293           | 10.114  |                         |
| VARS2  | KLh7rfiOdE8eVpeXU  | rs1264303  | 6.59                         | 6.30    | 0.128                | 1.69                     | 0.53   | 0.355                         | 9.091  | 0.336                             | 8.3     | 8.928           | 9.074  | 9.293           | 10.114  |                         |
| VARS2  | KLh7rfiOdE8eVpeXU  | rs1264302  | 6.59                         | 6.30    | 0.128                | 1.81                     | 0.65   | 0.355                         | 9.091  | 0.336                             | 8.3     | 8.928           | 9.074  | 9.293           | 10.114  |                         |
| VARS2  | KLh7rfiOdE8eVpeXU  | rs2074506  | 6.59                         | 6.30    | 0.128                | 1.79                     | -3.75  | 0.355                         | 9.091  | 0.336                             | 8.3     | 8.928           | 9.074  | 9.293           | 10.114  |                         |
| VARS2  | KLh7rfiOdE8eVpeXU  | rs753725   | 9.6                          | 9.16    | -0.187               | 3.09                     | -3.36  | 0.46                          | 9.091  | 0.336                             | 8.3     | 8.928           | 9.074  | 9.293           | 10.114  |                         |
| VARS2  | KLh7rfiOdE8eVpeXU  | rs4678     | 3.42                         | 3.28    | 0.064                | 2.25                     | -0.29  | 0.205                         | 9.091  | 0.336                             | 8.3     | 8.928           | 9.074  | 9.293           | 10.114  |                         |
| VARS2  | KLh7rfiOdE8eVpeXU  | rs2532934  | 9.82                         | 9.37    | -0.192               | 3.51                     | 0.53   | 0.465                         | 9.091  | 0.336                             | 8.3     | 8.928           | 9.074  | 9.293           | 10.114  |                         |
| VARS2  | KLh7rfiOdE8eVpeXU  | rs2844651  | 9.4                          | 8.98    | -0.185               | 3.46                     | 6.43   | 0.4672                        | 9.091  | 0.336                             | 8.3     | 8.928           | 9.074  | 9.293           | 10.114  |                         |
| VARS2  | KLh7rfiOdE8eVpeXU  | rs3132571  | 4.04                         | 3.87    | -0.079               | 2.78                     | 11.08  | 0.345                         | 9.091  | 0.336                             | 8.3     | 8.928           | 9.074  | 9.293           | 10.114  |                         |
| VARS2  | KLh7rfiOdE8eVpeXU  | rs2844702  | 7.42                         | 7.09    | -0.146               | 2.2                      | 18.25  | 0.3561                        | 9.091  | 0.336                             | 8.3     | 8.928           | 9.074  | 9.293           | 10.114  |                         |
| VARS2  | KLh7rfiOdE8eVpeXU  | rs2517451  | 4.41                         | 4.22    | 0.084                | 0.68                     | 20.52  | 0.12                          | 9.091  | 0.336                             | 8.3     | 8.928           | 9.074  | 9.293           | 10.114  |                         |
| VARS2  | KLh7rfiOdE8eVpeXU  | rs2240804  | 7.5                          | 7.16    | -0.146               | 1.99                     | 26.66  | 0.355                         | 9.091  | 0.336                             | 8.3     | 8.928           | 9.074  | 9.293           | 10.114  |                         |
| VASH1  | T46F1WdXQnejp5Lvs  | rs10483877 | 10.69                        | 10.20   | -0.197               | 4.74                     | -46.23 | 0.2275                        | 8.121  | 0.407                             | 7.281   | 7.841           | 8.077  | 8.345           | 9.724   |                         |
| VASH1  | T46F1WdXQnejp5Lvs  | rs4903482  | 7.04                         | 6.73    | 0.129                | 3.81                     | -19.13 | 0.15                          | 8.121  | 0.407                             | 7.281   | 7.841           | 8.077  | 8.345           | 9.724   |                         |
| VASH1  | T46F1WdXQnejp5Lvs  | rs7155817  | 3.82                         | 3.65    | -0.067               | 1.87                     | -18.28 | 0.103                         | 8.121  | 0.407                             | 7.281   | 7.841           | 8.077  | 8.345           | 9.724   |                         |
| VASH1  | T46F1WdXQnejp5Lvs  | rs11628491 | 9.56                         | 9.13    | 0.175                | 4.52                     | -8.99  | 0.27                          | 8.121  | 0.407                             | 7.281   | 7.841           | 8.077  | 8.345           | 9.724   |                         |
| VASH1  | T46F1WdXQnejp5Lvs  | rs6574326  | 9.57                         | 9.13    | 0.175                | 4.69                     | -5.83  | 0.2725                        | 8.121  | 0.407                             | 7.281   | 7.841           | 8.077  | 8.345           | 9.724   |                         |
| VASH1  | T46F1WdXQnejp5Lvs  | rs3783996  | 5.73                         | 5.48    | -0.104               | 1.82                     | 6.23   | 0.1575                        | 8.121  | 0.407                             | 7.281   | 7.841           | 8.077  | 8.345           | 9.724   |                         |
| VASH1  | T46F1WdXQnejp5Lvs  | rs1076584  | 3.67                         | 3.51    | 0.064                | 0.75                     | 4.74   | 0.0975                        | 8.121  | 0.407                             | 7.281   | 7.841           | 8.077  | 8.345           | 9.724   |                         |
| VASH1  | T46F1WdXQnejp5Lvs  | rs2075773  | 3.67                         | 3.51    | -0.064               | 0.75                     | 20.43  | 0.0975                        | 8.121  | 0.407                             | 7.281   | 7.841           | 8.077  | 8.345           | 9.724   |                         |
| VASP   | oo7qL.wOcyV6n5VP6o | rs10995    | 6.6                          | 6.31    | 0.131                | 2.01                     | -0.09  | 0.2825                        | 9.091  | 0.419                             | 7.736   | 8.812           | 9.085  | 9.362           | 10.183  |                         |
| VASP   | oo7qL.wOcyV6n5VP6o | rs8111589  | 4.27                         | 4.09    | -0.083               | 1.78                     | 4.32   | 0.4675                        | 9.091  | 0.419                             | 7.736   | 8.812           | 9.085  | 9.362           | 10.183  |                         |
| VEZT   | okgunni3d1.FFOSgSE | rs17023834 | 8.52                         | 8.13    | -0.158               | 2.95                     | 1.66   | 0.13                          | 9.148  | 0.258                             | 8.193   | 8.979           | 9.164  | 9.314           | 9.772   |                         |
| VEZT   | okgunni3d1.FFOSgSE | rs2367305  | 6.99                         | 6.68    | 0.133                | 1.23                     | 20.38  | 0.2775                        | 9.148  | 0.258                             | 8.193   | 8.979           | 9.164  | 9.314           | 9.772   |                         |
| VEZT   | okgunni3d1.FFOSgSE | rs14121    | 7.84                         | 7.68    | -0.156               | 1.56                     | -0.55  | 0.27                          | 9.148  | 0.258                             | 8.193   | 8.979           | 9.164  | 9.314           | 9.772   |                         |
| VIL2   | cKeegpJ_6KW_vwVHTO | rs9347258  | 3.3                          | 3.16    | 0.064                | 3.81                     | -6.22  | 0.49                          | 12.132 | 0.275                             | 10.972  | 11.939          | 12.141 | 12.292          | 12.938  |                         |
| VN1R1  | iI5KEKAEd.XDevOU4  | rs2360764  | 4.19                         | 4.01    | 0.083                | 1.88                     | 15.22  | 0.375                         | 7.133  | 0.029                             | 7.096   | 7.113           | 7.124  | 7.145           | 7.267   |                         |
| VN1R1  | iI5KEKAEd.XDevOU4  | rs2285609  | 4.19                         | 4.01    | -0.083               | 1.88                     | 23.2   | 0.375                         | 7.133  | 0.029                             | 7.096   | 7.113           | 7.124  | 7.145           | 7.267   |                         |
| VN1R1  | iI5KEKAEd.XDevOU4  | rs2285611  | 4.19                         | 4.01    | -0.083               | 1.88                     | 24.22  | 0.375                         | 7.133  | 0.029                             | 7.096   | 7.113           | 7.124  | 7.145           | 7.267   |                         |
| VN1R1  | iI5KEKAEd.XDevOU4  | rs2074071  | 4.22                         | 4.04    | 0.084                | 2.31                     | 35.73  | 0.315                         | 7.133  | 0.029                             | 7.096   | 7.113           | 7.124  | 7.145           | 7.267   |                         |
| VN1R1  | iI5KEKAEd.XDevOU4  | rs2360761  | 4.22                         | 4.04    | 0.084                | 2.31                     | 39.93  | 0.315                         | 7.133  | 0.029                             | 7.096   | 7.113           | 7.124  | 7.145           | 7.267   |                         |



| Symbol  | Lumi nuID          | SNP        | Population-based | Population-based          | % Variance | Family-based     | Distance from | MAF    | Mean      | Transcript abundance (log2 scale) |            |            |            |        | SNP mapping under probe |
|---------|--------------------|------------|------------------|---------------------------|------------|------------------|---------------|--------|-----------|-----------------------------------|------------|------------|------------|--------|-------------------------|
|         |                    |            | association      | association               |            | association      |               |        |           | transcript (kb)                   | Standard   | 25th       | Median     | 75th   |                         |
|         |                    |            | p-value (-log10) | p-value (-log10), GC adj. | Explained  | p-value (-log10) |               |        | Deviation | percentile                        | percentile | percentile | percentile |        |                         |
| VNN3    | QpXs6CLV4goV1GfKko | rs6936594  | 3.95             | 3.78                      | 0.074      | 0.23             | 19.39         | 0.0678 | 7.247     | 0.173                             | 7.112      | 7.159      | 7.199      | 7.267  | 8.415                   |
| VPS41   | WdJp181Qhy7n95xHnl | rs7778570  | 3.44             | 3.29                      | -0.062     | 1.39             | -14.54        | 0.1641 | 7.441     | 0.115                             | 7.169      | 7.367      | 7.45       | 7.511  | 7.712                   |
| VPS41   | WdJp181Qhy7n95xHnl | rs1859493  | 3.63             | 3.47                      | 0.064      | 2.11             | -9.97         | 0.0975 | 7.441     | 0.115                             | 7.169      | 7.367      | 7.45       | 7.511  | 7.712                   |
| VPS53   | KeRNCSBIVNNbhBen1E | rs4968169  | 3.64             | 3.49                      | 0.069      | 1.23             | -31.33        | 0.325  | 7.342     | 0.143                             | 7.106      | 7.252      | 7.316      | 7.415  | 7.827                   |
| VRK3    | f5KN5u7dTOFU_11Y64 | rs6509448  | 4.98             | 4.77                      | 0.098      | 3.42             | -23.21        | 0.3725 | 10.111    | 0.436                             | 8.953      | 9.801      | 10.118     | 10.381 | 11.529                  |
| VRK3    | oOISRbRd1WPNXfdl64 | rs6509448  | 3.75             | 3.59                      | 0.073      | 3                | -23.21        | 0.3725 | 8.29      | 0.327                             | 7.129      | 8.107      | 8.308      | 8.513  | 9.109                   |
| VRK3    | f5KN5u7dTOFU_11Y64 | rs12984158 | 7.73             | 7.38                      | -0.154     | 3.5              | -2.02         | 0.1825 | 10.111    | 0.436                             | 8.953      | 9.801      | 10.118     | 10.381 | 11.529                  |
| VRK3    | f5KN5u7dTOFU_11Y64 | rs3786669  | 6.01             | 5.74                      | 0.118      | 3.03             | 7.21          | 0.3975 | 10.111    | 0.436                             | 8.953      | 9.801      | 10.118     | 10.381 | 11.529                  |
| VRK3    | f5KN5u7dTOFU_11Y64 | rs745952   | 8.22             | 7.85                      | -0.166     | 3.37             | 17.8          | 0.1075 | 10.111    | 0.436                             | 8.953      | 9.801      | 10.118     | 10.381 | 11.529                  |
| VRK3    | oOISRbRd1WPNXfdl64 | rs745952   | 4.52             | 4.33                      | -0.091     | 1.92             | 17.8          | 0.1075 | 8.29      | 0.327                             | 7.129      | 8.107      | 8.308      | 8.513  | 9.109                   |
| VRK3    | f5KN5u7dTOFU_11Y64 | rs7259059  | 7.03             | 6.72                      | 0.14       | 3.15             | -14.33        | 0.2    | 10.111    | 0.436                             | 8.953      | 9.801      | 10.118     | 10.381 | 11.529                  |
| VRK3    | f5KN5u7dTOFU_11Y64 | rs734910   | 3.3              | 3.16                      | -0.063     | 2.42             | -4.58         | 0.4475 | 10.111    | 0.436                             | 8.953      | 9.801      | 10.118     | 10.381 | 11.529                  |
| VRK3    | f5KN5u7dTOFU_11Y64 | rs245111   | 6.16             | 5.89                      | -0.121     | 2.66             | 0.09          | 0.41   | 10.111    | 0.436                             | 8.953      | 9.801      | 10.118     | 10.381 | 11.529                  |
| VRK3    | f5KN5u7dTOFU_11Y64 | rs17312204 | 3.73             | 3.57                      | -0.072     | 1.95             | 29.07         | 0.0575 | 10.111    | 0.436                             | 8.953      | 9.801      | 10.118     | 10.381 | 11.529                  |
| VRK3    | f5KN5u7dTOFU_11Y64 | rs957738   | 6.77             | 6.47                      | -0.138     | 3.68             | 34.43         | 0.2    | 10.111    | 0.436                             | 8.953      | 9.801      | 10.118     | 10.381 | 11.529                  |
| VRK3    | oOISRbRd1WPNXfdl64 | rs957738   | 4.86             | 4.64                      | -0.099     | 2.59             | 34.43         | 0.2    | 8.29      | 0.327                             | 7.129      | 8.107      | 8.308      | 8.513  | 9.109                   |
| VRK3    | f5KN5u7dTOFU_11Y64 | rs8101040  | 8.33             | 7.96                      | 0.169      | 3.09             | 35.09         | 0.1106 | 10.111    | 0.436                             | 8.953      | 9.801      | 10.118     | 10.381 | 11.529                  |
| VRK3    | oOISRbRd1WPNXfdl64 | rs8101040  | 5.62             | 5.37                      | 0.115      | 1.8              | 35.09         | 0.1106 | 8.29      | 0.327                             | 7.129      | 8.107      | 8.308      | 8.513  | 9.109                   |
| WBSCR27 | oXsWAughpUr4oLiNSU | rs13232536 | 33.5             | 31.91                     | -0.541     | 13.22            | -29.41        | 0.2864 | 7.23      | 0.136                             | 7.101      | 7.125      | 7.174      | 7.3    | 7.768                   |
| WBSCR27 | oXsWAughpUr4oLiNSU | rs9647713  | 16.9             | 16.11                     | -0.317     | 6.15             | -22.11        | 0.2175 | 7.23      | 0.136                             | 7.101      | 7.125      | 7.174      | 7.3    | 7.768                   |
| WBSCR27 | oXsWAughpUr4oLiNSU | rs4255023  | 42.28            | 40.25                     | -0.621     | 14.08            | -9.3          | 0.295  | 7.23      | 0.136                             | 7.101      | 7.125      | 7.174      | 7.3    | 7.768                   |
| WBSCR27 | oXsWAughpUr4oLiNSU | rs4304218  | 43.11            | 41.04                     | 0.627      | 14.11            | -3.88         | 0.2925 | 7.23      | 0.136                             | 7.101      | 7.125      | 7.174      | 7.3    | 7.768                   |
| WBSCR27 | oXsWAughpUr4oLiNSU | rs4717112  | 40.73            | 38.78                     | -0.605     | 14.1             | 8.56          | 0.2975 | 7.23      | 0.136                             | 7.101      | 7.125      | 7.174      | 7.3    | 7.768                   |
| WBSCR27 | oXsWAughpUr4oLiNSU | rs13244770 | 19.31            | 18.41                     | -0.35      | 7.37             | 23.84         | 0.415  | 7.23      | 0.136                             | 7.101      | 7.125      | 7.174      | 7.3    | 7.768                   |
| WDR18   | itu9q.9d7h6it_u3bo | rs2240152  | 3.5              | 3.36                      | -0.066     | 0.46             | -1.67         | 0.4575 | 10.676    | 0.282                             | 9.996      | 10.527     | 10.669     | 10.833 | 11.629                  |
| WDR21A  | 0S44hriOv4tdrl6sko | rs3814864  | 4.24             | 4.06                      | -0.084     | 2.49             | -31.82        | 0.3575 | 8.642     | 0.301                             | 8.028      | 8.428      | 8.635      | 8.84   | 9.747                   |
| WDR21A  | 0S44hriOv4tdrl6sko | rs11629006 | 9.11             | 8.70                      | -0.189     | 2.46             | -21.36        | 0.1725 | 8.642     | 0.301                             | 8.028      | 8.428      | 8.635      | 8.84   | 9.747                   |
| WDR21A  | 0S44hriOv4tdrl6sko | rs7140896  | 4.49             | 4.29                      | 0.089      | 1.72             | -10.6         | 0.2576 | 8.642     | 0.301                             | 8.028      | 8.428      | 8.635      | 8.84   | 9.747                   |
| WDR21A  | 0S44hriOv4tdrl6sko | rs7142086  | 3.96             | 3.79                      | -0.075     | 1.47             | -1.49         | 0.0825 | 8.642     | 0.301                             | 8.028      | 8.428      | 8.635      | 8.84   | 9.747                   |
| WDR21A  | 0S44hriOv4tdrl6sko | rs17122581 | 8.91             | 8.51                      | -0.184     | 2.43             | 10.24         | 0.2025 | 8.642     | 0.301                             | 8.028      | 8.428      | 8.635      | 8.84   | 9.747                   |
| WDR21A  | 0S44hriOv4tdrl6sko | rs7144193  | 8.94             | 8.54                      | 0.188      | 2.5              | -1.04         | 0.2035 | 8.642     | 0.301                             | 8.028      | 8.428      | 8.635      | 8.84   | 9.747                   |
| WDR21A  | 0S44hriOv4tdrl6sko | rs12931    | 4.36             | 4.17                      | -0.085     | 1.78             | 14.51         | 0.4673 | 8.642     | 0.301                             | 8.028      | 8.428      | 8.635      | 8.84   | 9.747                   |
| WDR21A  | 0S44hriOv4tdrl6sko | rs2286836  | 4.01             | 3.84                      | -0.075     | 1.68             | 15.84         | 0.0875 | 8.642     | 0.301                             | 8.028      | 8.428      | 8.635      | 8.84   | 9.747                   |
| WDR4    | 36FHzuY1uhR_bmN7aU | rs9980962  | 3.67             | 3.51                      | 0.067      | 1.67             | -34.31        | 0.095  | 9.43      | 0.207                             | 8.877      | 9.313      | 9.423      | 9.561  | 10.26                   |
| WDR4    | KTICCOIWqimGcL5424 | rs2839584  | 4.3              | 4.11                      | 0.079      | 2.42             | -26.58        | 0.1975 | 7.314     | 0.091                             | 7.128      | 7.247      | 7.308      | 7.359  | 7.739                   |
| WDR4    | KTICCOIWqimGcL5424 | rs8132468  | 7.2              | 6.87                      | -0.134     | 2.12             | -15.17        | 0.11   | 7.314     | 0.091                             | 7.128      | 7.247      | 7.308      | 7.359  | 7.739                   |
| WDR4    | 36FHzuY1uhR_bmN7aU | rs8132468  | 6.62             | 6.32                      | -0.127     | 4.58             | -15.17        | 0.11   | 9.43      | 0.207                             | 8.877      | 9.313      | 9.423      | 9.561  | 10.26                   |
| WDR4    | 36FHzuY1uhR_bmN7aU | rs2839586  | 4.03             | 3.86                      | 0.074      | 1.77             | -11.98        | 0.0975 | 9.43      | 0.207                             | 8.877      | 9.313      | 9.423      | 9.561  | 10.26                   |
| WDR4    | KTICCOIWqimGcL5424 | rs8133179  | 3.99             | 3.81                      | -0.071     | 0.01             | 9.12          | 0.1125 | 7.314     | 0.091                             | 7.128      | 7.247      | 7.308      | 7.359  | 7.739                   |
| WDR4    | KTICCOIWqimGcL5424 | rs15736    | 3.37             | 3.23                      | -0.061     | 0.16             | 10.65         | 0.385  | 7.314     | 0.091                             | 7.128      | 7.247      | 7.308      | 7.359  | 7.739                   |
| WDR4    | KTICCOIWqimGcL5424 | rs2839589  | 3.37             | 3.23                      | -0.061     | 0.16             | 11.02         | 0.385  | 7.314     | 0.091                             | 7.128      | 7.247      | 7.308      | 7.359  | 7.739                   |
| WDR4    | KTICCOIWqimGcL5424 | rs11911090 | 6.63             | 6.34                      | -0.124     | 2.07             | -16.1         | 0.1106 | 7.314     | 0.091                             | 7.128      | 7.247      | 7.308      | 7.359  | 7.739                   |
| WDR4    | 36FHzuY1uhR_bmN7aU | rs11911090 | 5.9              | 5.64                      | -0.113     | 4.33             | -16.1         | 0.1106 | 9.43      | 0.207                             | 8.877      | 9.313      | 9.423      | 9.561  | 10.26                   |
| WDR4    | 36FHzuY1uhR_bmN7aU | rs2839597  | 3.59             | 3.44                      | 0.065      | 1.59             | 1.78          | 0.1025 | 9.43      | 0.207                             | 8.877      | 9.313      | 9.423      | 9.561  | 10.26                   |
| WDR4    | KTICCOIWqimGcL5424 | rs2839601  | 3.99             | 3.82                      | -0.071     | 0.36             | -17.7         | 0.1475 | 7.314     | 0.091                             | 7.128      | 7.247      | 7.308      | 7.359  | 7.739                   |
| WDR41   | xniZB5VN4UeHQMYHn4 | rs6874493  | 5.14             | 4.92                      | 0.099      | 2.38             | -26.33        | 0.465  | 8.194     | 0.354                             | 7.294      | 7.994      | 8.176      | 8.391  | 9.808                   |
| WDR41   | xniZB5VN4UeHQMYHn4 | rs374003   | 10.32            | 9.85                      | -0.199     | 3.91             | -25.87        | 0.1675 | 8.194     | 0.354                             | 7.294      | 7.994      | 8.176      | 8.391  | 9.808                   |
| WDR41   | xniZB5VN4UeHQMYHn4 | rs2242159  | 4.65             | 4.45                      | 0.09       | 4.53             | -13.69        | 0.4525 | 8.194     | 0.354                             | 7.294      | 7.994      | 8.176      | 8.391  | 9.808                   |
| WDR41   | xniZB5VN4UeHQMYHn4 | rs2242160  | 4.55             | 4.35                      | 0.088      | 4.86             | -12.94        | 0.34   | 8.194     | 0.354                             | 7.294      | 7.994      | 8.176      | 8.391  | 9.808                   |
| WDR41   | xniZB5VN4UeHQMYHn4 | rs335640   | 4.96             | 4.74                      | -0.096     | 3.66             | -7.83         | 0.305  | 8.194     | 0.354                             | 7.294      | 7.994      | 8.176      | 8.391  | 9.808                   |
| WDR41   | xniZB5VN4UeHQMYHn4 | rs3149     | 5.58             | 5.33                      | 0.111      | 3.2              | 0.37          | 0.1633 | 8.194     | 0.354                             | 7.294      | 7.994      | 8.176      | 8.391  | 9.808                   |
| WDR41   | xniZB5VN4UeHQMYHn4 | rs441102   | 20.04            | 19.10                     | -0.366     | 5.39             | 10.9          | 0.1725 | 8.194     | 0.354                             | 7.294      | 7.994      | 8.176      | 8.391  | 9.808                   |
| WDR48   | NhKvV0ectJ9.6AehKU | rs7619193  | 16.63            | 15.85                     | -0.314     | 6.58             | -49.39        | 0.3125 | 9.692     | 0.303                             | 8.414      | 9.471      | 9.693      | 9.909  | 10.538                  |
| WDR48   | NhKvV0ectJ9.6AehKU | rs6599001  | 3.5              | 3.35                      | -0.063     | 1.47             | -19.36        | 0.115  | 9.692     | 0.303                             | 8.414      | 9.471      | 9.693      | 9.909  | 10.538                  |
| WDR48   | NhKvV0ectJ9.6AehKU | rs6599003  | 13.41            | 12.78                     | -0.258     | 5.44             | -0.18         | 0.3    | 9.692     | 0.303                             | 8.414      | 9.471      | 9.693      | 9.909  | 10.538                  |
| WDR48   | NhKvV0ectJ9.6AehKU | rs2293312  | 13.22            | 12.61                     | -0.254     | 5.3              | 17.63         | 0.3025 | 9.692     | 0.303                             | 8.414      | 9.471      | 9.693      | 9.909  | 10.538                  |
| WDR48   | NhKvV0ectJ9.6AehKU | rs11707101 | 10.86            | 10.36                     | -0.209     | 4.51             | -19.78        | 0.1425 | 9.692     | 0.303                             | 8.414      | 9.471      | 9.693      | 9.909  | 10.538                  |
| WDR48   | NhKvV0ectJ9.6AehKU | rs9809104  | 3.87             | 3.70                      | -0.074     | 0.9              | 8.55          | 0.191  | 9.692     | 0.303                             | 8.414      | 9.471      | 9.693      | 9.909  | 10.538                  |
| WDR48   | NhKvV0ectJ9.6AehKU | rs3796127  | 10.16            | 9.69                      | -0.201     | 4.69             | 12.52         | 0.13   | 9.692     | 0.303                             | 8.414      | 9.471      | 9.693      | 9.909  | 10.538                  |
| WDR48   | NhKvV0ectJ9.6AehKU | rs1112438  | 11.72            | 11.18                     | -0.221     | 5.22             | 14.46         | 0.2825 | 9.692     | 0.303                             | 8.414      | 9.471      | 9.693      | 9.909  | 10.538                  |
| WDR48   | NhKvV0ectJ9.6AehKU | rs2056615  | 3.81             | 3.65                      | -0.07      | 1.71             | 19.56         | 0.115  | 9.692     | 0.303                             | 8.414      | 9.471      | 9.693      | 9.909  | 10.538                  |
| WDR48   | NhKvV0ectJ9.6AehKU | rs784505   | 12.22            | 11.65                     | 0.237      | 5.31             | 30.88         | 0.3392 | 9.692     | 0.303                             | 8.414      | 9.471      | 9.693      | 9.909  | 10.538                  |

| Symbol   | Lumi nuID           | SNP        | Population-based association |                  | % Variance Explained | Family-based association |                               | Transcript abundance (log2 scale) |        |                    |         |                 |        |                 | SNP mapping under probe |         |
|----------|---------------------|------------|------------------------------|------------------|----------------------|--------------------------|-------------------------------|-----------------------------------|--------|--------------------|---------|-----------------|--------|-----------------|-------------------------|---------|
|          |                     |            | p-value (-log10)             | p-value (-log10) |                      | p-value (-log10)         | Distance from transcript (kb) | MAF                               | Mean   | Standard Deviation | Minimum | 25th percentile | Median | 75th percentile |                         | Maximum |
| WDR48    | NhKvV0ectJ9.6AehKU  | rs704959   | 9.83                         | 9.38             | 0.191                | 4.45                     | 42.38                         | 0.325                             | 9.692  | 0.303              | 8.414   | 9.471           | 9.693  | 9.909           | 10.538                  |         |
| WDR48    | NhKvV0ectJ9.6AehKU  | rs1274958  | 14.59                        | 13.92            | -0.275               | 6.56                     | 47.08                         | 0.2372                            | 9.692  | 0.303              | 8.414   | 9.471           | 9.693  | 9.909           | 10.538                  |         |
| WDR55    | xgkjdAkeO4oLH5Vskk  | rs778584   | 3.43                         | 3.29             | -0.065               | 2.61                     | -39.21                        | 0.49                              | 8.985  | 0.262              | 8.181   | 8.812           | 9.016  | 9.166           | 9.74                    |         |
| WDR55    | xgkjdAkeO4oLH5Vskk  | rs2569188  | 3.5                          | 3.35             | -0.068               | 2.88                     | -36                           | 0.4872                            | 8.985  | 0.262              | 8.181   | 8.812           | 9.016  | 9.166           | 9.74                    |         |
| WDR55    | xgkjdAkeO4oLH5Vskk  | rs753279   | 3.35                         | 3.21             | -0.063               | 2.95                     | -20.6                         | 0.4475                            | 8.985  | 0.262              | 8.181   | 8.812           | 9.016  | 9.166           | 9.74                    |         |
| WDR73    | r4urdOoESuR.VEfVU   | rs2271433  | 3.37                         | 3.23             | -0.064               | 1.87                     | -36.24                        | 0.1275                            | 8.868  | 0.444              | 7.908   | 8.518           | 8.867  | 9.121           | 10.26                   |         |
| WDR73    | r4urdOoESuR.VEfVU   | rs3817193  | 3.32                         | 3.18             | 0.063                | 1.95                     | -26.02                        | 0.1375                            | 8.868  | 0.444              | 7.908   | 8.518           | 8.867  | 9.121           | 10.26                   |         |
| WDR77    | 6TrvrfsITz.17n1Un0  | rs1264874  | 4.06                         | 3.89             | -0.08                | 1.3                      | -31.97                        | 0.4075                            | 7.39   | 0.136              | 7.109   | 7.308           | 7.377  | 7.476           | 8.017                   |         |
| WDR77    | 6TrvrfsITz.17n1Un0  | rs2485319  | 4.22                         | 4.04             | 0.083                | 1.08                     | -24.82                        | 0.4075                            | 7.39   | 0.136              | 7.109   | 7.308           | 7.377  | 7.476           | 8.017                   |         |
| WDR77    | 6TrvrfsITz.17n1Un0  | rs4838910  | 5.48                         | 5.24             | -0.111               | 1.16                     | -22.53                        | 0.35                              | 7.39   | 0.136              | 7.109   | 7.308           | 7.377  | 7.476           | 8.017                   |         |
| WDR77    | 6TrvrfsITz.17n1Un0  | rs1264882  | 4.01                         | 3.84             | 0.079                | 1.01                     | -19.57                        | 0.4                               | 7.39   | 0.136              | 7.109   | 7.308           | 7.377  | 7.476           | 8.017                   |         |
| WDR77    | 6TrvrfsITz.17n1Un0  | rs1264894  | 3.79                         | 3.62             | 0.074                | 0.99                     | -12.79                        | 0.3725                            | 7.39   | 0.136              | 7.109   | 7.308           | 7.377  | 7.476           | 8.017                   |         |
| WDR77    | 6TrvrfsITz.17n1Un0  | rs2298185  | 6.3                          | 6.02             | -0.135               | 1.74                     | -1.56                         | 0.25                              | 7.39   | 0.136              | 7.109   | 7.308           | 7.377  | 7.476           | 8.017                   |         |
| WDR77    | 6TrvrfsITz.17n1Un0  | rs1264898  | 3.97                         | 3.80             | 0.078                | 1.19                     | 0.99                          | 0.38                              | 7.39   | 0.136              | 7.109   | 7.308           | 7.377  | 7.476           | 8.017                   |         |
| WDR77    | 6TrvrfsITz.17n1Un0  | rs1264897  | 3.97                         | 3.80             | 0.078                | 1.17                     | 1.39                          | 0.38                              | 7.39   | 0.136              | 7.109   | 7.308           | 7.377  | 7.476           | 8.017                   |         |
| WDR77    | 6TrvrfsITz.17n1Un0  | rs12040764 | 6.98                         | 6.66             | -0.148               | 1.51                     | 9.75                          | 0.2953                            | 7.39   | 0.136              | 7.109   | 7.308           | 7.377  | 7.476           | 8.017                   |         |
| WDR77    | 6TrvrfsITz.17n1Un0  | rs1054680  | 4.5                          | 4.30             | 0.092                | 0.91                     | 29.2                          | 0.3425                            | 7.39   | 0.136              | 7.109   | 7.308           | 7.377  | 7.476           | 8.017                   |         |
| WDR86    | Q6QNtdipfqgB4DMSU   | rs446886   | 3.35                         | 3.21             | 0.061                | 1.42                     | -25.17                        | 0.3275                            | 7.935  | 0.368              | 7.222   | 7.666           | 7.893  | 8.163           | 8.938                   | Yes     |
| WDR86    | Q6QNtdipfqgB4DMSU   | rs2108726  | 4.73                         | 4.53             | -0.091               | 1.15                     | -8.8                          | 0.3258                            | 7.935  | 0.368              | 7.222   | 7.666           | 7.893  | 8.163           | 8.938                   | Yes     |
| WDR86    | Q6QNtdipfqgB4DMSU   | rs1558164  | 3.89                         | 3.73             | 0.074                | 0.02                     | 8.58                          | 0.4525                            | 7.935  | 0.368              | 7.222   | 7.666           | 7.893  | 8.163           | 8.938                   | Yes     |
| WDR86    | Q6QNtdipfqgB4DMSU   | rs11760463 | 7.96                         | 7.60             | 0.156                | 1.3                      | 13.68                         | 0.485                             | 7.935  | 0.368              | 7.222   | 7.666           | 7.893  | 8.163           | 8.938                   | Yes     |
| WDR86    | Q6QNtdipfqgB4DMSU   | rs3815332  | 3.64                         | 3.49             | -0.07                | 1.43                     | 14.56                         | 0.1533                            | 7.935  | 0.368              | 7.222   | 7.666           | 7.893  | 8.163           | 8.938                   | Yes     |
| WDSUB1   | TbELVOEDfvfX0msfEU  | rs6432515  | 3.71                         | 3.55             | 0.074                | 2                        | -37.38                        | 0.399                             | 8.591  | 0.393              | 7.11    | 8.349           | 8.585  | 8.858           | 9.654                   |         |
| WDSUB1   | TbELVOEDfvfX0msfEU  | rs2159874  | 10.64                        | 10.15            | 0.218                | 3.19                     | -23.29                        | 0.3525                            | 8.591  | 0.393              | 7.11    | 8.349           | 8.585  | 8.858           | 9.654                   |         |
| WDSUB1   | TbELVOEDfvfX0msfEU  | rs7588862  | 9.62                         | 9.18             | -0.196               | 3.26                     | -18.79                        | 0.4296                            | 8.591  | 0.393              | 7.11    | 8.349           | 8.585  | 8.858           | 9.654                   |         |
| WDSUB1   | TbELVOEDfvfX0msfEU  | rs885640   | 10.71                        | 10.22            | -0.217               | 3.76                     | -17.13                        | 0.39                              | 8.591  | 0.393              | 7.11    | 8.349           | 8.585  | 8.858           | 9.654                   |         |
| WDSUB1   | TbELVOEDfvfX0msfEU  | rs7591849  | 8.63                         | 8.24             | 0.178                | 2.89                     | 20.57                         | 0.4571                            | 8.591  | 0.393              | 7.11    | 8.349           | 8.585  | 8.858           | 9.654                   |         |
| WDSUB1   | TbELVOEDfvfX0msfEU  | rs17494490 | 3.79                         | 3.63             | -0.077               | 2.22                     | -17.86                        | 0.35                              | 8.591  | 0.393              | 7.11    | 8.349           | 8.585  | 8.858           | 9.654                   |         |
| WDSUB1   | TbELVOEDfvfX0msfEU  | rs7608205  | 5.91                         | 5.65             | 0.12                 | 1.58                     | -7.82                         | 0.5                               | 8.591  | 0.393              | 7.11    | 8.349           | 8.585  | 8.858           | 9.654                   |         |
| WDSUB1   | TbELVOEDfvfX0msfEU  | rs174261   | 10.17                        | 9.70             | -0.203               | 3.17                     | 4.08                          | 0.4125                            | 8.591  | 0.393              | 7.11    | 8.349           | 8.585  | 8.858           | 9.654                   |         |
| WDSUB1   | TbELVOEDfvfX0msfEU  | rs12612419 | 3.74                         | 3.58             | 0.072                | 1.74                     | 10.58                         | 0.495                             | 8.591  | 0.393              | 7.11    | 8.349           | 8.585  | 8.858           | 9.654                   |         |
| WFIKKN1  | 02KKG50KOE16I0L36KU | rs7204088  | 3.63                         | 3.48             | -0.069               | 1.93                     | -19.87                        | 0.1975                            | 7.116  | 0.033              | 7.091   | 7.103           | 7.109  | 7.116           | 7.394                   |         |
| WWC1     | 3ffie4bv.O6eVBuiak  | rs6555802  | 3.51                         | 3.36             | -0.068               | 0.81                     | 53.98                         | 0.35                              | 7.326  | 0.141              | 7.115   | 7.229           | 7.296  | 7.398           | 7.936                   |         |
| WWC1     | 3ffie4bv.O6eVBuiak  | rs2059090  | 3.72                         | 3.56             | -0.074               | 0.13                     | 65.53                         | 0.055                             | 7.326  | 0.141              | 7.115   | 7.229           | 7.296  | 7.398           | 7.936                   |         |
| WWC1     | 3ffie4bv.O6eVBuiak  | rs6873727  | 4.15                         | 3.97             | 0.082                | 1.33                     | 68.49                         | 0.45                              | 7.326  | 0.141              | 7.115   | 7.229           | 7.296  | 7.398           | 7.936                   |         |
| WWC1     | 3ffie4bv.O6eVBuiak  | rs4976597  | 7.52                         | 7.18             | -0.15                | 3.69                     | 80.6                          | 0.385                             | 7.326  | 0.141              | 7.115   | 7.229           | 7.296  | 7.398           | 7.936                   |         |
| WWC1     | 3ffie4bv.O6eVBuiak  | rs4976598  | 8.13                         | 7.77             | 0.162                | 3.7                      | 86.92                         | 0.4025                            | 7.326  | 0.141              | 7.115   | 7.229           | 7.296  | 7.398           | 7.936                   |         |
| WWC1     | 3ffie4bv.O6eVBuiak  | rs2337135  | 3.66                         | 3.50             | 0.07                 | 2.33                     | -86.44                        | 0.2387                            | 7.326  | 0.141              | 7.115   | 7.229           | 7.296  | 7.398           | 7.936                   |         |
| WWC1     | 3ffie4bv.O6eVBuiak  | rs2112555  | 3.62                         | 3.46             | 0.069                | 2.33                     | -75.78                        | 0.2375                            | 7.326  | 0.141              | 7.115   | 7.229           | 7.296  | 7.398           | 7.936                   |         |
| WVOX     | fUV11IAuSDAD.UckAg  | rs11150047 | 3.61                         | 3.46             | -0.073               | 0.61                     | 68.2                          | 0.2825                            | 7.157  | 0.049              | 7.11    | 7.132           | 7.142  | 7.165           | 7.494                   |         |
| WVOX     | i.7InSdeVu0_63XSLU  | rs6564520  | 4                            | 3.83             | 0.078                | 1.95                     | 172.67                        | 0.425                             | 7.178  | 0.061              | 7.098   | 7.137           | 7.159  | 7.205           | 7.438                   |         |
| WVOX     | i.7InSdeVu0_63XSLU  | rs9926888  | 3.66                         | 3.51             | -0.073               | 2.18                     | 175.39                        | 0.475                             | 7.178  | 0.061              | 7.098   | 7.137           | 7.159  | 7.205           | 7.438                   |         |
| WVOX     | i.7InSdeVu0_63XSLU  | rs4243149  | 4.3                          | 4.12             | 0.087                | 3.13                     | 178.22                        | 0.3775                            | 7.178  | 0.061              | 7.098   | 7.137           | 7.159  | 7.205           | 7.438                   |         |
| XBP1     | Tn3sJBqBF54qp39XTs  | rs6005863  | 4.39                         | 4.20             | 0.083                | 3.43                     | -34.1                         | 0.4375                            | 10.829 | 0.388              | 10.046  | 10.53           | 10.831 | 11.079          | 12.231                  |         |
| XBP1     | Tn3sJBqBF54qp39XTs  | rs6005868  | 4.9                          | 4.68             | -0.094               | 2.58                     | -24.78                        | 0.1156                            | 10.829 | 0.388              | 10.046  | 10.53           | 10.831 | 11.079          | 12.231                  |         |
| XBP1     | Tn3sJBqBF54qp39XTs  | rs5762788  | 4.65                         | 4.45             | -0.089               | 2.94                     | -15.78                        | 0.3375                            | 10.829 | 0.388              | 10.046  | 10.53           | 10.831 | 11.079          | 12.231                  |         |
| XBP1     | Tn3sJBqBF54qp39XTs  | rs3788409  | 4.43                         | 4.24             | -0.085               | 2.83                     | 1.59                          | 0.335                             | 10.829 | 0.388              | 10.046  | 10.53           | 10.831 | 11.079          | 12.231                  |         |
| XBP1     | Tn3sJBqBF54qp39XTs  | rs7287806  | 4.43                         | 4.24             | -0.085               | 2.66                     | 16.45                         | 0.3375                            | 10.829 | 0.388              | 10.046  | 10.53           | 10.831 | 11.079          | 12.231                  |         |
| XKR6     | Te7Zd1u6N6S2tNReeQ  | rs7832722  | 4.49                         | 4.29             | -0.085               | 3.97                     | -93.43                        | 0.42                              | 7.806  | 0.209              | 7.369   | 7.651           | 7.794  | 7.932           | 8.559                   |         |
| XPNPEP1  | lol5Vh9.pS46oNLI50  | rs550697   | 5.97                         | 5.71             | -0.119               | 1.91                     | 12.76                         | 0.36                              | 10.472 | 0.209              | 10.07   | 10.325          | 10.446 | 10.592          | 11.613                  |         |
| XPNPEP1  | lol5Vh9.pS46oNLI50  | rs3780950  | 3.32                         | 3.18             | 0.058                | 0.67                     | 17.18                         | 0.1425                            | 10.472 | 0.209              | 10.07   | 10.325          | 10.446 | 10.592          | 11.613                  |         |
| XPNPEP1  | lol5Vh9.pS46oNLI50  | rs568298   | 5.79                         | 5.53             | -0.109               | 1.2                      | -28.14                        | 0.4747                            | 10.472 | 0.209              | 10.07   | 10.325          | 10.446 | 10.592          | 11.613                  |         |
| XPNPEP1  | lol5Vh9.pS46oNLI50  | rs944968   | 8.1                          | 7.74             | -0.157               | 2.27                     | -20.26                        | 0.405                             | 10.472 | 0.209              | 10.07   | 10.325          | 10.446 | 10.592          | 11.613                  |         |
| XPNPEP1  | lol5Vh9.pS46oNLI50  | rs921348   | 5.29                         | 5.06             | 0.102                | 1.16                     | 24.3                          | 0.15                              | 10.472 | 0.209              | 10.07   | 10.325          | 10.446 | 10.592          | 11.613                  |         |
| XPNPEP1  | lol5Vh9.pS46oNLI50  | rs7906904  | 5.29                         | 5.06             | 0.102                | 1.08                     | 24.99                         | 0.1525                            | 10.472 | 0.209              | 10.07   | 10.325          | 10.446 | 10.592          | 11.613                  |         |
| XRCC6BP1 | HRRSH7uYhllHf3Nens  | rs7954957  | 14.84                        | 14.15            | -0.287               | 3.63                     | -36.2                         | 0.435                             | 9.034  | 0.314              | 8.006   | 8.883           | 9.074  | 9.232           | 9.733                   | Yes     |
| XRCC6BP1 | HRRSH7uYhllHf3Nens  | rs10431506 | 26.64                        | 25.37            | 0.464                | 4.91                     | -23.92                        | 0.3071                            | 9.034  | 0.314              | 8.006   | 8.883           | 9.074  | 9.232           | 9.733                   | Yes     |
| XRCC6BP1 | HRRSH7uYhllHf3Nens  | rs7299249  | 18.57                        | 17.69            | -0.345               | 3.95                     | -7.34                         | 0.3775                            | 9.034  | 0.314              | 8.006   | 8.883           | 9.074  | 9.232           | 9.733                   | Yes     |
| XRCC6BP1 | HRRSH7uYhllHf3Nens  | rs10122    | 18.68                        | 17.81            | -0.348               | 3.77                     | -0.42                         | 0.3775                            | 9.034  | 0.314              | 8.006   | 8.883           | 9.074  | 9.232           | 9.733                   | Yes     |
| XRCC6BP1 | HRRSH7uYhllHf3Nens  | rs7954291  | 15.32                        | 14.60            | -0.295               | 2.8                      | 9.45                          | 0.3241                            | 9.034  | 0.314              | 8.006   | 8.883           | 9.074  | 9.232           | 9.733                   | Yes     |
| XRCC6BP1 | HRRSH7uYhllHf3Nens  | rs7974557  | 11.32                        | 10.80            | 0.221                | 1.97                     | 10.73                         | 0.2864                            | 9.034  | 0.314              | 8.006   | 8.883           | 9.074  | 9.232           | 9.733                   | Yes     |
| XRCC6BP1 | HRRSH7uYhllHf3Nens  | rs4362183  | 11.17                        | 10.66            | 0.221                | 1.64                     | 12.19                         | 0.2843                            | 9.034  | 0.314              | 8.006   | 8.883           | 9.074  | 9.232           | 9.733                   | Yes     |

| Symbol   | Lumi nuID         | SNP                 | Population-based             | Population-based                      | % Variance Explained | Family-based                 | Distance from transcript (kb) | MAF    | Mean   | Transcript abundance (log2 scale) |         |                 |        |                 | SNP mapping under probe |         |
|----------|-------------------|---------------------|------------------------------|---------------------------------------|----------------------|------------------------------|-------------------------------|--------|--------|-----------------------------------|---------|-----------------|--------|-----------------|-------------------------|---------|
|          |                   |                     | association p-value (-log10) | association p-value (-log10), GC adj. |                      | association p-value (-log10) |                               |        |        | Standard Deviation                | Minimum | 25th percentile | Median | 75th percentile |                         | Maximum |
| XRCC6BP1 | HRRSH7YhllHf3Nens | rs11172406          | 15.47                        | 14.75                                 | 0.296                | 3.09                         | 15.55                         | 0.325  | 9.034  | 0.314                             | 8.006   | 8.883           | 9.074  | 9.232           | 9.733                   | Yes     |
| XRCC6BP1 | HRRSH7YhllHf3Nens | rs10506393          | 12.31                        | 11.74                                 | 0.24                 | 2.42                         | 35.67                         | 0.325  | 9.034  | 0.314                             | 8.006   | 8.883           | 9.074  | 9.232           | 9.733                   | Yes     |
| XRCC6BP1 | HRRSH7YhllHf3Nens | rs1506888           | 8.95                         | 8.54                                  | 0.176                | 1.72                         | 45.92                         | 0.2875 | 9.034  | 0.314                             | 8.006   | 8.883           | 9.074  | 9.232           | 9.733                   | Yes     |
|          | XYLB              | 3TfgLi67X_ik66OApk  | rs11710235                   | 4.19                                  | 4.01                 | -0.083                       | 2.18                          | 0.1432 | 7.164  | 0.046                             | 7.097   | 7.133           | 7.154  | 7.179           | 7.374                   |         |
|          | XYLB              | 3TfgLi67X_ik66OApk  | rs1381798                    | 5.5                                   | 5.26                 | -0.109                       | 2.57                          | 0.2775 | 7.164  | 0.046                             | 7.097   | 7.133           | 7.154  | 7.179           | 7.374                   |         |
|          | YEATS4            | QrqfR6IDofHkDnuO.c  | rs7307739                    | 3.59                                  | 3.44                 | -0.069                       | 1.71                          | 0.4422 | 8.222  | 0.541                             | 7.299   | 7.824           | 8.16   | 8.554           | 9.805                   |         |
|          | YWHAAH            | Wpz7X7s14SZTu7SV0O  | rs7291050                    | 3.68                                  | 3.53                 | 0.067                        | 1.06                          | 0.2775 | 12.02  | 0.271                             | 11.168  | 11.876          | 12.026 | 12.199          | 12.751                  | Yes     |
|          | ZBTB32            | lrZlUUpSYlcSLihHgs  | rs2267586                    | 6.79                                  | 6.49                 | -0.135                       | 1.86                          | -44.46 | 0.065  | 7.345                             | 0.136   | 7.155           | 7.25   | 7.318           | 7.404                   | 8.14    |
|          | ZBTB32            | lrZlUUpSYlcSLihHgs  | rs2227278                    | 10.18                                 | 9.71                 | 0.204                        | 2.18                          | -1.89  | 0.0775 | 7.345                             | 0.136   | 7.155           | 7.25   | 7.318           | 7.404                   | 8.14    |
|          | ZCCHC8            | uR4QB_ qojuDOF6.lio | rs10744218                   | 3.37                                  | 3.23                 | -0.065                       | 0.68                          | -15.25 | 0.3675 | 7.59                              | 0.29    | 7.13            | 7.415  | 7.513           | 7.68                    | 8.978   |
|          | ZCRB1             | K31T3t5K6sizrDqPliU | rs1563419                    | 4.69                                  | 4.49                 | -0.093                       | 0.63                          | -19.19 | 0.06   | 7.943                             | 0.174   | 7.431           | 7.832  | 7.961           | 8.062                   | 8.458   |
|          | ZCRB1             | K31T3t5K6sizrDqPliU | rs17121217                   | 5.09                                  | 4.87                 | 0.102                        | 0.63                          | 26.65  | 0.0625 | 7.943                             | 0.174   | 7.431           | 7.832  | 7.961           | 8.062                   | 8.458   |
|          | ZCRB1             | K31T3t5K6sizrDqPliU | rs17091117                   | 5.09                                  | 4.87                 | -0.102                       | 0.63                          | 46.78  | 0.0625 | 7.943                             | 0.174   | 7.431           | 7.832  | 7.961           | 8.062                   | 8.458   |
|          | ZDHHC7            | o7tEliqEC7q416IZS8  | rs12600202                   | 4.3                                   | 4.12                 | -0.078                       | 1.42                          | -10.2  | 0.1025 | 10.807                            | 0.324   | 10.181          | 10.587 | 10.756          | 10.951                  | 12.159  |
|          | ZDHHC7            | o7tEliqEC7q416IZS8  | rs9936836                    | 3.67                                  | 3.51                 | 0.07                         | 1.6                           | 11.02  | 0.1875 | 10.807                            | 0.324   | 10.181          | 10.587 | 10.756          | 10.951                  | 12.159  |
|          | ZDHHC7            | o7tEliqEC7q416IZS8  | rs1392526                    | 3.46                                  | 3.32                 | 0.066                        | 1.67                          | 30.6   | 0.215  | 10.807                            | 0.324   | 10.181          | 10.587 | 10.756          | 10.951                  | 12.159  |
|          | ZFAND2A           | rIU_JFNUR6eeN_vio   | rs4236375                    | 4.1                                   | 3.92                 | -0.078                       | 1.14                          | -48.02 | 0.4775 | 10.228                            | 0.33    | 9.3             | 10.002 | 10.228          | 10.448                  | 11.256  |
|          | ZFAND2A           | rIU_JFNUR6eeN_vio   | rs7788231                    | 3.38                                  | 3.24                 | 0.062                        | 1.17                          | -31.39 | 0.2475 | 10.228                            | 0.33    | 9.3             | 10.002 | 10.228          | 10.448                  | 11.256  |
|          | ZFAND2A           | rIU_JFNUR6eeN_vio   | rs12702440                   | 9.4                                   | 8.97                 | 0.182                        | 1.86                          | 5.68   | 0.4225 | 10.228                            | 0.33    | 9.3             | 10.002 | 10.228          | 10.448                  | 11.256  |
|          | ZFAND2A           | rIU_JFNUR6eeN_vio   | rs2960852                    | 9.4                                   | 8.97                 | 0.182                        | 1.86                          | 9.17   | 0.4225 | 10.228                            | 0.33    | 9.3             | 10.002 | 10.228          | 10.448                  | 11.256  |
|          | ZFAND2A           | rIU_JFNUR6eeN_vio   | rs2140578                    | 9.02                                  | 8.61                 | 0.176                        | 1.59                          | 14.21  | 0.3894 | 10.228                            | 0.33    | 9.3             | 10.002 | 10.228          | 10.448                  | 11.256  |
|          | ZFAND2A           | rIU_JFNUR6eeN_vio   | rs1880296                    | 6.17                                  | 5.89                 | -0.119                       | 0.61                          | 16.41  | 0.4375 | 10.228                            | 0.33    | 9.3             | 10.002 | 10.228          | 10.448                  | 11.256  |
|          | ZFHx2             | 3Cn8BEiNd0mlupeVfs  | rs12436235                   | 3.33                                  | 3.19                 | -0.062                       | 0.82                          | -33.56 | 0.0825 | 7.111                             | 0.012   | 7.089           | 7.103  | 7.109           | 7.116                   | 7.173   |
|          | ZFP14             | oVEkkEUpe0RI4O74qA  | rs2967506                    | 3.56                                  | 3.45                 | 0.066                        | 1                             | -13.83 | 0.3769 | 7.939                             | 0.313   | 7.251           | 7.709  | 7.907           | 8.079                   | 9.099   |
|          | ZFP14             | oVEkkEUpe0RI4O74qA  | rs12462725                   | 9.17                                  | 8.71                 | -0.179                       | 2.91                          | -11.99 | 0.2412 | 7.939                             | 0.313   | 7.251           | 7.709  | 7.907           | 8.079                   | 9.099   |
|          | ZFP14             | oVEkkEUpe0RI4O74qA  | rs2385799                    | 3.5                                   | 3.35                 | 0.065                        | 1.19                          | 6.85   | 0.3325 | 7.939                             | 0.313   | 7.251           | 7.709  | 7.907           | 8.079                   | 9.099   |
|          | ZFP14             | oVEkkEUpe0RI4O74qA  | rs6417185                    | 3.5                                   | 3.35                 | -0.065                       | 1.19                          | 11.5   | 0.3325 | 7.939                             | 0.313   | 7.251           | 7.709  | 7.907           | 8.079                   | 9.099   |
|          | ZFP14             | oVEkkEUpe0RI4O74qA  | rs2271842                    | 8.72                                  | 8.33                 | 0.169                        | 2.64                          | 30.7   | 0.26   | 7.939                             | 0.313   | 7.251           | 7.709  | 7.907           | 8.079                   | 9.099   |
|          | ZFP14             | oVEkkEUpe0RI4O74qA  | rs17206379                   | 8.72                                  | 8.33                 | -0.169                       | 2.64                          | 32.14  | 0.26   | 7.939                             | 0.313   | 7.251           | 7.709  | 7.907           | 8.079                   | 9.099   |
|          | ZFP14             | oVEkkEUpe0RI4O74qA  | rs2945985                    | 3.59                                  | 3.43                 | -0.067                       | 1.19                          | 44.09  | 0.33   | 7.939                             | 0.313   | 7.251           | 7.709  | 7.907           | 8.079                   | 9.099   |
|          | ZFP161            | fFP6pFLUxSeY.uLoU   | rs12604505                   | 4.41                                  | 4.22                 | -0.087                       | 0.54                          | -37.26 | 0.0825 | 10.051                            | 0.261   | 8.897           | 9.907  | 10.082          | 10.232                  | 10.617  |
|          | ZFP161            | fFP6pFLUxSeY.uLoU   | rs4797206                    | 4.52                                  | 4.33                 | 0.091                        | 0.61                          | -11.78 | 0.0808 | 10.051                            | 0.261   | 8.897           | 9.907  | 10.082          | 10.232                  | 10.617  |
|          | ZFP161            | fFP6pFLUxSeY.uLoU   | rs12456241                   | 4.41                                  | 4.22                 | -0.087                       | 0.54                          | -9.42  | 0.0825 | 10.051                            | 0.261   | 8.897           | 9.907  | 10.082          | 10.232                  | 10.617  |
|          | ZFP28             | rskki_JL7hKIU7peSI  | rs3813141                    | 3.46                                  | 3.22                 | 0.061                        | 2.36                          | -9.65  | 0.245  | 7.346                             | 0.107   | 7.149           | 7.279  | 7.336           | 7.4                     | 7.804   |
|          | ZFP28             | rskki_JL7hKIU7peSI  | rs10409531                   | 5.02                                  | 4.80                 | 0.093                        | 3.28                          | -2.16  | 0.3075 | 7.346                             | 0.107   | 7.149           | 7.279  | 7.336           | 7.4                     | 7.804   |
|          | ZFP28             | rskki_JL7hKIU7peSI  | rs4401145                    | 5.03                                  | 4.81                 | 0.093                        | 3.3                           | 1.46   | 0.3125 | 7.346                             | 0.107   | 7.149           | 7.279  | 7.336           | 7.4                     | 7.804   |
|          | ZFP28             | rskki_JL7hKIU7peSI  | rs2904241                    | 5.85                                  | 5.59                 | 0.111                        | 2.6                           | 31.31  | 0.3425 | 7.346                             | 0.107   | 7.149           | 7.279  | 7.336           | 7.4                     | 7.804   |
|          | ZFP28             | rskki_JL7hKIU7peSI  | rs741253                     | 4.43                                  | 4.23                 | 0.081                        | 2.6                           | 32.72  | 0.25   | 7.346                             | 0.107   | 7.149           | 7.279  | 7.336           | 7.4                     | 7.804   |
|          | ZFP90             | lIUeIOBTKfOJFSX.Kk  | rs1182968                    | 6.53                                  | 6.24                 | 0.132                        | 2.74                          | 0.73   | 0.2175 | 10.321                            | 0.297   | 8.367           | 10.181 | 10.37           | 10.5                    | 10.831  |
|          | ZFP90             | lIUeIOBTKfOJFSX.Kk  | rs1645928                    | 6.85                                  | 6.55                 | -0.137                       | 3.27                          | -10.43 | 0.2125 | 10.321                            | 0.297   | 8.367           | 10.181 | 10.37           | 10.5                    | 10.831  |
|          | ZFP90             | lIUeIOBTKfOJFSX.Kk  | rs1645929                    | 4.04                                  | 3.86                 | 0.078                        | 2.72                          | -9.69  | 0.3875 | 10.321                            | 0.297   | 8.367           | 10.181 | 10.37           | 10.5                    | 10.831  |
|          | ZFP90             | lIUeIOBTKfOJFSX.Kk  | rs1177648                    | 3.73                                  | 3.57                 | 0.071                        | 2.57                          | -3.03  | 0.3894 | 10.321                            | 0.297   | 8.367           | 10.181 | 10.37           | 10.5                    | 10.831  |
|          | ZFP90             | lIUeIOBTKfOJFSX.Kk  | rs1170426                    | 6.67                                  | 6.37                 | 0.134                        | 3.14                          | 2.76   | 0.215  | 10.321                            | 0.297   | 8.367           | 10.181 | 10.37           | 10.5                    | 10.831  |
|          | ZFP90             | lIUeIOBTKfOJFSX.Kk  | rs2862780                    | 6.64                                  | 6.35                 | -0.133                       | 3.7                           | 38.3   | 0.4146 | 10.321                            | 0.297   | 8.367           | 10.181 | 10.37           | 10.5                    | 10.831  |
|          | ZHX2              | fUleogerJK6eH38JF8  | rs10108984                   | 3.84                                  | 3.67                 | -0.067                       | 3.01                          | -13.19 | 0.4625 | 8.89                              | 0.275   | 7.837           | 8.705  | 8.887           | 9.072                   | 9.534   |
|          | ZHX2              | fUleogerJK6eH38JF8  | rs7844465                    | 3.84                                  | 3.67                 | 0.068                        | 2.11                          | -6.06  | 0.3719 | 8.89                              | 0.275   | 7.837           | 8.705  | 8.887           | 9.072                   | 9.534   |
|          | ZKSCAN3           | TenH5XAUkfrjx6ujo   | rs853679                     | 3.33                                  | 3.19                 | -0.063                       | 2.56                          | -20.9  | 0.1683 | 8.048                             | 0.152   | 7.682           | 7.946  | 8.041           | 8.138                   | 8.599   |
|          | ZKSCAN3           | TenH5XAUkfrjx6ujo   | rs17312661                   | 3.54                                  | 3.39                 | 0.066                        | 0.95                          | -17.42 | 0.1497 | 8.048                             | 0.152   | 7.682           | 7.946  | 8.041           | 8.138                   | 8.599   |
|          | ZMIZ2             | 3cooh6hCQCnkBBUglTU | rs799449                     | 4.13                                  | 3.95                 | -0.079                       | 1.65                          | -3.83  | 0.4775 | 9.35                              | 0.374   | 7.286           | 9.149  | 9.346           | 9.561                   | 10.295  |
|          | ZMIZ2             | 3cooh6hCQCnkBBUglTU | rs1050331                    | 6.46                                  | 6.17                 | 0.128                        | 3.06                          | -1.39  | 0.47   | 9.35                              | 0.374   | 7.286           | 9.149  | 9.346           | 9.561                   | 10.295  |
|          | ZMIZ2             | 3cooh6hCQCnkBBUglTU | rs1065646                    | 6.77                                  | 6.47                 | -0.134                       | 3.21                          | -0.21  | 0.465  | 9.35                              | 0.374   | 7.286           | 9.149  | 9.346           | 9.561                   | 10.295  |
|          | ZMIZ2             | 3cooh6hCQCnkBBUglTU | rs13231886                   | 4.67                                  | 4.47                 | -0.091                       | 1.45                          | 4.69   | 0.415  | 9.35                              | 0.374   | 7.286           | 9.149  | 9.346           | 9.561                   | 10.295  |
|          | ZNF100            | N1UnOzkkSVN1.97vOk  | rs4613201                    | 3.98                                  | 3.81                 | -0.074                       | 1.15                          | 22.14  | 0.1725 | 7.127                             | 0.021   | 7.102           | 7.113  | 7.121           | 7.133                   | 7.273   |
|          | ZNF100            | N1UnOzkkSVN1.97vOk  | rs11670736                   | 4.12                                  | 3.94                 | -0.08                        | 1.13                          | 2.41   | 0.2475 | 7.127                             | 0.021   | 7.102           | 7.113  | 7.121           | 7.133                   | 7.273   |
|          | ZNF124            | fJDuoCX0jGUVv9IBGI  | rs4925715                    | 3.47                                  | 3.32                 | -0.064                       | 1.8                           | -30.73 | 0.3025 | 7.596                             | 0.248   | 7.12            | 7.408  | 7.567           | 7.761                   | 8.427   |
|          | ZNF132            | 6SgX_SpTdFTkkwplJQ  | rs11878198                   | 4.95                                  | 4.74                 | -0.099                       | 0.52                          | -23.88 | 0.19   | 7.339                             | 0.114   | 7.146           | 7.249  | 7.326           | 7.403                   | 7.707   |
|          | ZNF132            | 6SgX_SpTdFTkkwplJQ  | rs11084543                   | 4.95                                  | 4.74                 | 0.099                        | 0.52                          | -11.48 | 0.19   | 7.339                             | 0.114   | 7.146           | 7.249  | 7.326           | 7.403                   | 7.707   |
|          | ZNF132            | 6SgX_SpTdFTkkwplJQ  | rs11667591                   | 5.75                                  | 5.49                 | 0.116                        | 0.78                          | -6.54  | 0.185  | 7.339                             | 0.114   | 7.146           | 7.249  | 7.326           | 7.403                   | 7.707   |
|          | ZNF132            | 6SgX_SpTdFTkkwplJQ  | rs11670871                   | 5.35                                  | 5.12                 | -0.108                       | 0.85                          | -3.67  | 0.1875 | 7.339                             | 0.114   | 7.146           | 7.249  | 7.326           | 7.403                   | 7.707   |
|          | ZNF132            | 6SgX_SpTdFTkkwplJQ  | rs1465789                    | 6.79                                  | 6.49                 | 0.137                        | 1.1                           | 1.87   | 0.45   | 7.339                             | 0.114   | 7.146           | 7.249  | 7.326           | 7.403                   | 7.707   |
|          | ZNF132            | 6SgX_SpTdFTkkwplJQ  | rs893186                     | 6.9                                   | 6.59                 | 0.138                        | 1.53                          | 17.59  | 0.4375 | 7.339                             | 0.114   | 7.146           | 7.249  | 7.326           | 7.403                   | 7.707   |
|          | ZNF132            | 6SgX_SpTdFTkkwplJQ  | rs893185                     | 6.3                                   | 6.02                 | -0.125                       | 1.15                          | 37.91  | 0.4375 | 7.339                             | 0.114   | 7.146           | 7.249  | 7.326           | 7.403                   | 7.707   |

| Symbol | Lumi nuID          | SNP        | Population-based association |         |                      | Family-based association |                               |        | Transcript abundance (log2 scale) |                    |         |                 |        |                 | SNP mapping under probe |         |
|--------|--------------------|------------|------------------------------|---------|----------------------|--------------------------|-------------------------------|--------|-----------------------------------|--------------------|---------|-----------------|--------|-----------------|-------------------------|---------|
|        |                    |            | p-value (-log10)             | GC adj. | % Variance Explained | p-value (-log10)         | Distance from transcript (kb) | MAF    | Mean                              | Standard Deviation | Minimum | 25th percentile | Median | 75th percentile |                         | Maximum |
| ZNF160 | iqFSd9_SUegnjRei4I | rs4801950  | 15.1                         | 14.40   | -0.298               | 3.79                     | 12.95                         | 0.095  | 7.332                             | 0.131              | 7.127   | 7.228           | 7.318  | 7.396           | 7.871                   |         |
| ZNF160 | iqFSd9_SUegnjRei4I | rs329719   | 15.1                         | 14.40   | 0.298                | 3.55                     | -17.63                        | 0.095  | 7.332                             | 0.131              | 7.127   | 7.228           | 7.318  | 7.396           | 7.871                   |         |
| ZNF160 | iqFSd9_SUegnjRei4I | rs4411612  | 3.29                         | 3.16    | 0.061                | 1.27                     | -7.06                         | 0.44   | 7.332                             | 0.131              | 7.127   | 7.228           | 7.318  | 7.396           | 7.871                   |         |
| ZNF160 | iqFSd9_SUegnjRei4I | rs4801954  | 5.68                         | 5.43    | 0.11                 | 1.95                     | -5.83                         | 0.28   | 7.332                             | 0.131              | 7.127   | 7.228           | 7.318  | 7.396           | 7.871                   |         |
| ZNF160 | iqFSd9_SUegnjRei4I | rs17300167 | 8.01                         | 7.65    | 0.159                | 2.31                     | -1.63                         | 0.05   | 7.332                             | 0.131              | 7.127   | 7.228           | 7.318  | 7.396           | 7.871                   |         |
| ZNF167 | Kumi_5RcTIUOICAnXo | rs2141574  | 7.16                         | 6.84    | 0.145                | 4.11                     | -19.48                        | 0.3528 | 7.143                             | 0.041              | 7.095   | 7.118           | 7.13   | 7.154           | 7.359                   |         |
| ZNF167 | Kumi_5RcTIUOICAnXo | rs9868821  | 6.37                         | 6.09    | -0.13                | 4.67                     | -15.37                        | 0.3518 | 7.143                             | 0.041              | 7.095   | 7.118           | 7.13   | 7.154           | 7.359                   |         |
| ZNF167 | Kumi_5RcTIUOICAnXo | rs13081859 | 6.12                         | 5.85    | 0.124                | 4.77                     | 10.3                          | 0.335  | 7.143                             | 0.041              | 7.095   | 7.118           | 7.13   | 7.154           | 7.359                   |         |
| ZNF167 | Kumi_5RcTIUOICAnXo | rs13319803 | 16.76                        | 15.98   | -0.317               | 6.79                     | 10.49                         | 0.3725 | 7.143                             | 0.041              | 7.095   | 7.118           | 7.13   | 7.154           | 7.359                   |         |
| ZNF167 | Kumi_5RcTIUOICAnXo | rs13321717 | 17.02                        | 16.23   | -0.323               | 6.71                     | 42.48                         | 0.3819 | 7.143                             | 0.041              | 7.095   | 7.118           | 7.13   | 7.154           | 7.359                   |         |
| ZNF181 | WioLFS9QszV89xJlgc | rs7257305  | 3.82                         | 3.66    | 0.075                | 1                        | 23.42                         | 0.1175 | 7.978                             | 0.495              | 7.118   | 7.588           | 7.901  | 8.277           | 9.194                   |         |
| ZNF193 | QHkF09INI11ES6eJ60 | rs1233708  | 4.34                         | 4.15    | 0.088                | 2.02                     | -19.85                        | 0.34   | 7.591                             | 0.252              | 7.146   | 7.41            | 7.557  | 7.715           | 8.509                   |         |
| ZNF193 | QHkF09INI11ES6eJ60 | rs12214383 | 4.95                         | 4.73    | -0.096               | 2.57                     | 22.47                         | 0.4525 | 7.591                             | 0.252              | 7.146   | 7.41            | 7.557  | 7.715           | 8.509                   |         |
| ZNF215 | EnnKOZ3IRU6V7HoMEo | rs7110568  | 3.59                         | 3.44    | -0.073               | 2.81                     | -15.26                        | 0.1625 | 7.157                             | 0.041              | 7.101   | 7.13            | 7.148  | 7.168           | 7.36                    |         |
| ZNF215 | EnnKOZ3IRU6V7HoMEo | rs1018002  | 3.59                         | 3.44    | -0.073               | 2.95                     | -7.86                         | 0.1625 | 7.157                             | 0.041              | 7.101   | 7.13            | 7.148  | 7.168           | 7.36                    |         |
| ZNF215 | EnnKOZ3IRU6V7HoMEo | rs10839658 | 8.53                         | 8.15    | 0.172                | 4.17                     | -5.18                         | 0.34   | 7.157                             | 0.041              | 7.101   | 7.13            | 7.148  | 7.168           | 7.36                    |         |
| ZNF215 | EnnKOZ3IRU6V7HoMEo | rs12806437 | 3.39                         | 3.25    | 0.063                | 1.03                     | -4.96                         | 0.1775 | 7.157                             | 0.041              | 7.101   | 7.13            | 7.148  | 7.168           | 7.36                    |         |
| ZNF215 | EnnKOZ3IRU6V7HoMEo | rs1491823  | 9.95                         | 9.50    | -0.199               | 4.56                     | 0.48                          | 0.305  | 7.157                             | 0.041              | 7.101   | 7.13            | 7.148  | 7.168           | 7.36                    |         |
| ZNF215 | EnnKOZ3IRU6V7HoMEo | rs1602569  | 7.83                         | 7.48    | -0.157               | 3.69                     | 10.94                         | 0.3325 | 7.157                             | 0.041              | 7.101   | 7.13            | 7.148  | 7.168           | 7.36                    |         |
| ZNF215 | EnnKOZ3IRU6V7HoMEo | rs10742995 | 6.61                         | 6.32    | 0.132                | 2.1                      | -0.62                         | 0.3392 | 7.157                             | 0.041              | 7.101   | 7.13            | 7.148  | 7.168           | 7.36                    |         |
| ZNF233 | 6eeTjbfhgQsXCAY6fU | rs12462723 | 3.38                         | 3.24    | -0.067               | 2.33                     | 5.9                           | 0.485  | 7.138                             | 0.034              | 7.101   | 7.119           | 7.129  | 7.147           | 7.339                   |         |
| ZNF233 | 6eeTjbfhgQsXCAY6fU | rs2125579  | 3.73                         | 3.58    | 0.075                | 2.66                     | 13.23                         | 0.485  | 7.138                             | 0.034              | 7.101   | 7.119           | 7.129  | 7.147           | 7.339                   |         |
| ZNF239 | c12cHhPJU9K30S20x4 | rs2393938  | 10.67                        | 10.18   | -0.205               | 2.88                     | -0.1                          | 0.0925 | 7.926                             | 0.234              | 7.31    | 7.772           | 7.941  | 8.076           | 8.591                   |         |
| ZNF239 | c12cHhPJU9K30S20x4 | rs7075288  | 3.44                         | 3.30    | 0.065                | 1.43                     | 6.68                          | 0.3375 | 7.926                             | 0.234              | 7.31    | 7.772           | 7.941  | 8.076           | 8.591                   |         |
| ZNF239 | c12cHhPJU9K30S20x4 | rs10793449 | 4.19                         | 4.01    | -0.078               | 2.04                     | 32.85                         | 0.2675 | 7.926                             | 0.234              | 7.31    | 7.772           | 7.941  | 8.076           | 8.591                   |         |
| ZNF266 | 6JQoSIXoEjn9POI1lo | rs2217652  | 11.84                        | 11.29   | 0.235                | 5.69                     | -32.46                        | 0.4171 | 10.37                             | 0.455              | 7.829   | 10.119          | 10.377 | 10.656          | 12.073                  |         |
| ZNF266 | 6JQoSIXoEjn9POI1lo | rs1433062  | 9.41                         | 8.98    | 0.19                 | 3.64                     | -29                           | 0.4775 | 10.37                             | 0.455              | 7.829   | 10.119          | 10.377 | 10.656          | 12.073                  |         |
| ZNF266 | 6JQoSIXoEjn9POI1lo | rs8112842  | 13.23                        | 12.62   | 0.258                | 6.26                     | -24.96                        | 0.4325 | 10.37                             | 0.455              | 7.829   | 10.119          | 10.377 | 10.656          | 12.073                  |         |
| ZNF266 | 6JQoSIXoEjn9POI1lo | rs6512121  | 14.29                        | 13.62   | 0.277                | 6.68                     | 10.53                         | 0.4325 | 10.37                             | 0.455              | 7.829   | 10.119          | 10.377 | 10.656          | 12.073                  |         |
| ZNF266 | 6JQoSIXoEjn9POI1lo | rs10411141 | 14.03                        | 13.37   | -0.273               | 6.53                     | -10.03                        | 0.43   | 10.37                             | 0.455              | 7.829   | 10.119          | 10.377 | 10.656          | 12.073                  |         |
| ZNF266 | 6JQoSIXoEjn9POI1lo | rs6512130  | 10.17                        | 9.71    | 0.205                | 3.68                     | 0.12                          | 0.4825 | 10.37                             | 0.455              | 7.829   | 10.119          | 10.377 | 10.656          | 12.073                  |         |
| ZNF266 | 6JQoSIXoEjn9POI1lo | rs7257399  | 3.6                          | 3.45    | 0.07                 | 1.7                      | 34.63                         | 0.4822 | 10.37                             | 0.455              | 7.829   | 10.119          | 10.377 | 10.656          | 12.073                  |         |
| ZNF30  | KOLVMVwi3ii7qC59u4 | rs2862783  | 3.43                         | 3.28    | -0.067               | 1.71                     | -47.58                        | 0.4103 | 8.741                             | 0.298              | 7.534   | 8.548           | 8.748  | 8.959           | 9.439                   | Yes     |
| ZNF30  | KOLVMVwi3ii7qC59u4 | rs1345655  | 4.54                         | 4.35    | -0.09                | 1.91                     | -37.48                        | 0.3668 | 8.741                             | 0.298              | 7.534   | 8.548           | 8.748  | 8.959           | 9.439                   | Yes     |
| ZNF30  | KOLVMVwi3ii7qC59u4 | rs10518287 | 3.31                         | 3.17    | -0.062               | 1.79                     | -18.48                        | 0.355  | 8.741                             | 0.298              | 7.534   | 8.548           | 8.748  | 8.959           | 9.439                   | Yes     |
| ZNF30  | KOLVMVwi3ii7qC59u4 | rs2545995  | 3.74                         | 3.59    | -0.072               | 1.62                     | -5.57                         | 0.3675 | 8.741                             | 0.298              | 7.534   | 8.548           | 8.748  | 8.959           | 9.439                   | Yes     |
| ZNF30  | KOLVMVwi3ii7qC59u4 | rs2546000  | 4.12                         | 3.95    | -0.081               | 1.73                     | 2.57                          | 0.3775 | 8.741                             | 0.298              | 7.534   | 8.548           | 8.748  | 8.959           | 9.439                   | Yes     |
| ZNF365 | if7UTqW_F8i8Ka_f.4 | rs7086545  | 3.72                         | 3.56    | -0.071               | 1.26                     | -47.43                        | 0.33   | 7.803                             | 0.256              | 7.27    | 7.619           | 7.809  | 7.932           | 8.571                   |         |
| ZNF365 | if7UTqW_F8i8Ka_f.4 | rs7919462  | 4.33                         | 4.15    | -0.086               | 1.66                     | -45.3                         | 0.4275 | 7.803                             | 0.256              | 7.27    | 7.619           | 7.809  | 7.932           | 8.571                   |         |
| ZNF365 | if7UTqW_F8i8Ka_f.4 | rs3864811  | 3.72                         | 3.56    | -0.072               | 1.11                     | -35.08                        | 0.3291 | 7.803                             | 0.256              | 7.27    | 7.619           | 7.809  | 7.932           | 8.571                   |         |
| ZNF365 | if7UTqW_F8i8Ka_f.4 | rs7092864  | 3.72                         | 3.56    | -0.071               | 1.11                     | -28.63                        | 0.33   | 7.803                             | 0.256              | 7.27    | 7.619           | 7.809  | 7.932           | 8.571                   |         |
| ZNF365 | if7UTqW_F8i8Ka_f.4 | rs1907707  | 4.86                         | 4.65    | 0.097                | 1.65                     | -16.11                        | 0.4325 | 7.803                             | 0.256              | 7.27    | 7.619           | 7.809  | 7.932           | 8.571                   |         |
| ZNF365 | if7UTqW_F8i8Ka_f.4 | rs3852425  | 3.36                         | 3.22    | 0.064                | 1.2                      | -12.73                        | 0.4425 | 7.803                             | 0.256              | 7.27    | 7.619           | 7.809  | 7.932           | 8.571                   |         |
| ZNF365 | if7UTqW_F8i8Ka_f.4 | rs2306970  | 3.66                         | 3.51    | -0.069               | 0.83                     | -3.46                         | 0.3125 | 7.803                             | 0.256              | 7.27    | 7.619           | 7.809  | 7.932           | 8.571                   |         |
| ZNF365 | if7UTqW_F8i8Ka_f.4 | rs3758490  | 4.95                         | 4.73    | -0.096               | 1.78                     | -2.87                         | 0.42   | 7.803                             | 0.256              | 7.27    | 7.619           | 7.809  | 7.932           | 8.571                   |         |
| ZNF365 | if7UTqW_F8i8Ka_f.4 | rs10821993 | 5.9                          | 5.64    | -0.117               | 2.06                     | 1.45                          | 0.4    | 7.803                             | 0.256              | 7.27    | 7.619           | 7.809  | 7.932           | 8.571                   |         |
| ZNF365 | if7UTqW_F8i8Ka_f.4 | rs4309048  | 5.82                         | 5.56    | 0.116                | 1.72                     | 12.12                         | 0.3643 | 7.803                             | 0.256              | 7.27    | 7.619           | 7.809  | 7.932           | 8.571                   |         |
| ZNF365 | if7UTqW_F8i8Ka_f.4 | rs7912735  | 5.79                         | 5.54    | 0.115                | 1.8                      | 15.65                         | 0.375  | 7.803                             | 0.256              | 7.27    | 7.619           | 7.809  | 7.932           | 8.571                   |         |
| ZNF365 | if7UTqW_F8i8Ka_f.4 | rs4636539  | 4.8                          | 4.60    | 0.093                | 1.39                     | 20.52                         | 0.395  | 7.803                             | 0.256              | 7.27    | 7.619           | 7.809  | 7.932           | 8.571                   |         |
| ZNF37A | iqgws3ROkrkqQliqol | rs7897675  | 4.32                         | 4.13    | -0.08                | 1.22                     | -3.71                         | 0.065  | 7.372                             | 0.09               | 7.204   | 7.305           | 7.37   | 7.431           | 7.713                   | Yes     |
| ZNF37A | iqgws3ROkrkqQliqol | rs17588142 | 4.3                          | 4.12    | -0.08                | 1.07                     | 15.43                         | 0.0675 | 7.372                             | 0.09               | 7.204   | 7.305           | 7.37   | 7.431           | 7.713                   | Yes     |
| ZNF415 | WRChu6SKfT8rdEHRyE | rs1650929  | 5.36                         | 5.12    | 0.105                | 2.16                     | -0.13                         | 0.32   | 7.444                             | 0.226              | 7.115   | 7.265           | 7.404  | 7.576           | 8.551                   |         |
| ZNF415 | WRChu6SKfT8rdEHRyE | rs2195310  | 6.54                         | 6.25    | 0.134                | 2.67                     | 9.15                          | 0.3147 | 7.444                             | 0.226              | 7.115   | 7.265           | 7.404  | 7.576           | 8.551                   |         |
| ZNF415 | WRChu6SKfT8rdEHRyE | rs10423215 | 12.84                        | 12.24   | -0.255               | 2.66                     | 12.93                         | 0.135  | 7.444                             | 0.226              | 7.115   | 7.265           | 7.404  | 7.576           | 8.551                   |         |
| ZNF415 | WRChu6SKfT8rdEHRyE | rs4575636  | 6.17                         | 5.90    | 0.126                | 2.62                     | 19.35                         | 0.33   | 7.444                             | 0.226              | 7.115   | 7.265           | 7.404  | 7.576           | 8.551                   |         |
| ZNF415 | WRChu6SKfT8rdEHRyE | rs4801958  | 3.92                         | 3.75    | -0.076               | 0.75                     | 31.66                         | 0.4    | 7.444                             | 0.226              | 7.115   | 7.265           | 7.404  | 7.576           | 8.551                   |         |
| ZNF415 | WRChu6SKfT8rdEHRyE | rs10409924 | 6.35                         | 6.07    | -0.129               | 0.95                     | 32.4                          | 0.1558 | 7.444                             | 0.226              | 7.115   | 7.265           | 7.404  | 7.576           | 8.551                   |         |
| ZNF415 | WRChu6SKfT8rdEHRyE | rs12460170 | 3.92                         | 3.75    | -0.076               | 0.92                     | 33.35                         | 0.4    | 7.444                             | 0.226              | 7.115   | 7.265           | 7.404  | 7.576           | 8.551                   |         |
| ZNF415 | WRChu6SKfT8rdEHRyE | rs8102278  | 6.57                         | 6.27    | -0.133               | 1.16                     | 43.8                          | 0.1583 | 7.444                             | 0.226              | 7.115   | 7.265           | 7.404  | 7.576           | 8.551                   |         |
| ZNF418 | B1JeWdeh5Xs3C10MBU | rs1428175  | 3.67                         | 3.51    | 0.07                 | 2.21                     | 19.21                         | 0.25   | 7.289                             | 0.166              | 7.117   | 7.17            | 7.246  | 7.325           | 8.221                   |         |
| ZNF418 | B1JeWdeh5Xs3C10MBU | rs10424113 | 3.76                         | 3.60    | -0.072               | 2.44                     | 23.78                         | 0.2475 | 7.289                             | 0.166              | 7.117   | 7.17            | 7.246  | 7.325           | 8.221                   |         |
| ZNF480 | ZKgSyEanzq6K_olo4I | rs8112051  | 3.46                         | 3.32    | -0.064               | 1.71                     | -14.03                        | 0.3975 | 9.125                             | 0.255              | 8.286   | 8.969           | 9.109  | 9.281           | 9.981                   |         |

| Symbol | Lumi nuID          | SNP        | Population-based             | Population-based                      | % Variance Explained | Family-based                 | Distance from transcript (kb) | MAF    | Mean   | Transcript abundance (log2 scale) |         |                 |        |                 | SNP mapping under probe |         |
|--------|--------------------|------------|------------------------------|---------------------------------------|----------------------|------------------------------|-------------------------------|--------|--------|-----------------------------------|---------|-----------------|--------|-----------------|-------------------------|---------|
|        |                    |            | association p-value (-log10) | association p-value (-log10), GC adj. |                      | association p-value (-log10) |                               |        |        | Standard Deviation                | Minimum | 25th percentile | Median | 75th percentile |                         | Maximum |
| ZNF480 | ZKgSyEanzq6K_olo4l | rs13343641 | 3.58                         | 3.43                                  | 0.066                | 1.86                         | -4.14                         | 0.2025 | 9.125  | 0.255                             | 8.286   | 8.969           | 9.109  | 9.281           | 9.981                   |         |
| ZNF480 | ZKgSyEanzq6K_olo4l | rs2115075  | 4.01                         | 3.84                                  | 0.075                | 2.11                         | 3.65                          | 0.3625 | 9.125  | 0.255                             | 8.286   | 8.969           | 9.109  | 9.281           | 9.981                   |         |
| ZNF480 | ZKgSyEanzq6K_olo4l | rs167707   | 3.79                         | 3.63                                  | 0.071                | 2.02                         | 10.77                         | 0.3375 | 9.125  | 0.255                             | 8.286   | 8.969           | 9.109  | 9.281           | 9.981                   |         |
| ZNF483 | NkvQinevaolno6LODU | rs7868884  | 5.41                         | 5.17                                  | 0.108                | 5.84                         | -35.74                        | 0.29   | 7.188  | 0.049                             | 7.109   | 7.155           | 7.179  | 7.207           | 7.43                    |         |
| ZNF483 | NkvQinevaolno6LODU | rs7857580  | 4.11                         | 3.93                                  | 0.084                | 3.1                          | -10.49                        | 0.38   | 7.188  | 0.049                             | 7.109   | 7.155           | 7.179  | 7.207           | 7.43                    |         |
| ZNF484 | 9udTIEPOu6odIK4UKU | rs10992498 | 3.56                         | 3.41                                  | -0.064               | 1.54                         | -15.4                         | 0.1425 | 7.855  | 0.149                             | 7.46    | 7.749           | 7.842  | 7.931           | 8.469                   |         |
| ZNF502 | BXKe_uXlhSKIIERyhw | rs7640654  | 16.32                        | 15.56                                 | 0.306                | 4.36                         | -2.29                         | 0.4575 | 7.472  | 0.214                             | 7.102   | 7.321           | 7.462  | 7.612           | 8.28                    |         |
| ZNF502 | BXKe_uXlhSKIIERyhw | rs4682752  | 12.03                        | 11.47                                 | 0.234                | 4.33                         | 10.64                         | 0.4625 | 7.472  | 0.214                             | 7.102   | 7.321           | 7.462  | 7.612           | 8.28                    |         |
| ZNF502 | BXKe_uXlhSKIIERyhw | rs9311361  | 15.54                        | 14.81                                 | -0.294               | 4.36                         | 30.81                         | 0.4675 | 7.472  | 0.214                             | 7.102   | 7.321           | 7.462  | 7.612           | 8.28                    |         |
| ZNF502 | BXKe_uXlhSKIIERyhw | rs937834   | 12.32                        | 11.75                                 | 0.24                 | 4.05                         | 38.4                          | 0.4648 | 7.472  | 0.214                             | 7.102   | 7.321           | 7.462  | 7.612           | 8.28                    |         |
| ZNF502 | BXKe_uXlhSKIIERyhw | rs7653392  | 12.03                        | 11.47                                 | 0.234                | 4.33                         | 40.55                         | 0.4625 | 7.472  | 0.214                             | 7.102   | 7.321           | 7.462  | 7.612           | 8.28                    |         |
| ZNF502 | BXKe_uXlhSKIIERyhw | rs6441867  | 12.03                        | 11.47                                 | 0.234                | 4.33                         | 44.78                         | 0.4625 | 7.472  | 0.214                             | 7.102   | 7.321           | 7.462  | 7.612           | 8.28                    |         |
| ZNF543 | oQlpOTM7Kju4f0S_0U | rs9304791  | 3.57                         | 3.42                                  | -0.07                | 1.51                         | -0.37                         | 0.065  | 7.958  | 0.252                             | 7.104   | 7.805           | 7.982  | 8.118           | 8.54                    |         |
| ZNF543 | oQlpOTM7Kju4f0S_0U | rs4801468  | 3.77                         | 3.61                                  | -0.073               | 1.75                         | 3.43                          | 0.3375 | 7.958  | 0.252                             | 7.104   | 7.805           | 7.982  | 8.118           | 8.54                    |         |
| ZNF543 | oQlpOTM7Kju4f0S_0U | rs7249011  | 6.71                         | 6.41                                  | -0.133               | 0.91                         | 3.97                          | 0.36   | 7.958  | 0.252                             | 7.104   | 7.805           | 7.982  | 8.118           | 8.54                    |         |
| ZNF543 | oQlpOTM7Kju4f0S_0U | rs13345625 | 7.4                          | 7.07                                  | -0.15                | 2.43                         | 4.04                          | 0.3116 | 7.958  | 0.252                             | 7.104   | 7.805           | 7.982  | 8.118           | 8.54                    |         |
| ZNF543 | oQlpOTM7Kju4f0S_0U | rs8099984  | 8.01                         | 7.65                                  | -0.16                | 3.21                         | 1.78                          | 0.4025 | 7.958  | 0.252                             | 7.104   | 7.805           | 7.982  | 8.118           | 8.54                    |         |
| ZNF543 | oQlpOTM7Kju4f0S_0U | rs2016993  | 4.17                         | 3.99                                  | -0.081               | 0.48                         | 3.19                          | 0.245  | 7.958  | 0.252                             | 7.104   | 7.805           | 7.982  | 8.118           | 8.54                    |         |
| ZNF544 | 9i6p9OFO5NIPI6LuR4 | rs431093   | 3.34                         | 3.20                                  | 0.063                | 0.65                         | 10.61                         | 0.4025 | 9.555  | 0.28                              | 8.55    | 9.349           | 9.55   | 9.722           | 10.435                  |         |
| ZNF545 | uioiKXngV7fthNRQJE | rs12462725 | 7.32                         | 6.99                                  | 0.133                | 4.1                          | -24.78                        | 0.2412 | 8.6    | 0.265                             | 7.902   | 8.446           | 8.598  | 8.746           | 9.319                   |         |
| ZNF545 | uioiKXngV7fthNRQJE | rs8111845  | 4.04                         | 3.86                                  | 0.072                | 2.29                         | -6.02                         | 0.3636 | 8.6    | 0.265                             | 7.902   | 8.446           | 8.598  | 8.746           | 9.319                   |         |
| ZNF545 | uioiKXngV7fthNRQJE | rs2271842  | 7.2                          | 6.88                                  | -0.13                | 5.09                         | -8.77                         | 0.26   | 8.6    | 0.265                             | 7.902   | 8.446           | 8.598  | 8.746           | 9.319                   |         |
| ZNF545 | uioiKXngV7fthNRQJE | rs17206379 | 7.2                          | 6.88                                  | 0.13                 | 5.23                         | -7.33                         | 0.26   | 8.6    | 0.265                             | 7.902   | 8.446           | 8.598  | 8.746           | 9.319                   |         |
| ZNF548 | xdUITK_f.Z3vj7ft44 | rs862707   | 4.08                         | 3.90                                  | 0.08                 | 0.65                         | -34.34                        | 0.1608 | 9.067  | 0.307                             | 8.224   | 8.897           | 9.058  | 9.258           | 10.124                  |         |
| ZNF548 | xdUITK_f.Z3vj7ft44 | rs12980669 | 4.22                         | 4.00                                  | 0.082                | 0.66                         | 29.22                         | 0.11   | 9.067  | 0.307                             | 8.224   | 8.897           | 9.058  | 9.258           | 10.124                  |         |
| ZNF586 | f9SXILtg3SEI5Rc_V4 | rs2239986  | 3.79                         | 3.63                                  | 0.072                | 1.67                         | -49.23                        | 0.455  | 10.617 | 0.275                             | 9.591   | 10.453          | 10.63  | 10.81           | 11.19                   |         |
| ZNF586 | f9SXILtg3SEI5Rc_V4 | rs9748978  | 3.42                         | 3.42                                  | -0.067               | 1.35                         | -31.93                        | 0.4825 | 10.617 | 0.275                             | 9.591   | 10.453          | 10.63  | 10.81           | 11.19                   |         |
| ZNF586 | f9SXILtg3SEI5Rc_V4 | rs10422444 | 3.5                          | 3.36                                  | -0.066               | 1.71                         | -2.61                         | 0.43   | 10.617 | 0.275                             | 9.591   | 10.453          | 10.63  | 10.81           | 11.19                   |         |
| ZNF589 | 0IKDp61p.7UdXdHol  | rs1045482  | 3.52                         | 3.37                                  | 0.064                | 1.89                         | -0.25                         | 0.3075 | 8.921  | 0.479                             | 7.998   | 8.512           | 8.932  | 9.234           | 10.945                  |         |
| ZNF593 | cOhLhkKHKeoqJuUFx8 | rs4281320  | 3.29                         | 3.15                                  | 0.06                 | 0.89                         | -14.07                        | 0.195  | 9.33   | 0.327                             | 8.378   | 9.124           | 9.309  | 9.54            | 10.74                   |         |
| ZNF593 | cOhLhkKHKeoqJuUFx8 | rs11247860 | 6.09                         | 5.82                                  | 0.118                | 5.49                         | 2.85                          | 0.3894 | 9.33   | 0.327                             | 8.378   | 9.124           | 9.309  | 9.54            | 10.74                   |         |
| ZNF593 | cOhLhkKHKeoqJuUFx8 | rs2783628  | 3.35                         | 3.21                                  | -0.063               | 3.38                         | 4.46                          | 0.32   | 9.33   | 0.327                             | 8.378   | 9.124           | 9.309  | 9.54            | 10.74                   |         |
| ZNF593 | cOhLhkKHKeoqJuUFx8 | rs2783633  | 3.35                         | 3.21                                  | -0.063               | 3.38                         | 7.9                           | 0.32   | 9.33   | 0.327                             | 8.378   | 9.124           | 9.309  | 9.54            | 10.74                   |         |
| ZNF593 | cOhLhkKHKeoqJuUFx8 | rs12138368 | 4                            | 3.83                                  | 0.075                | 2.1                          | 22.93                         | 0.11   | 9.33   | 0.327                             | 8.378   | 9.124           | 9.309  | 9.54            | 10.74                   |         |
| ZNF593 | cOhLhkKHKeoqJuUFx8 | rs12145714 | 10.38                        | 9.90                                  | -0.198               | 4.59                         | 29.89                         | 0.255  | 9.33   | 0.327                             | 8.378   | 9.124           | 9.309  | 9.54            | 10.74                   |         |
| ZNF654 | r5eFFx7DkgkfinTfkQ | rs7432826  | 4.09                         | 3.91                                  | -0.076               | 3.18                         | -0.45                         | 0.1175 | 8.253  | 0.318                             | 7.146   | 8.031           | 8.283  | 8.46            | 8.952                   |         |
| ZNF654 | r5eFFx7DkgkfinTfkQ | rs7432838  | 5.33                         | 5.03                                  | 0.102                | 2.91                         | -0.41                         | 0.1525 | 8.253  | 0.318                             | 7.146   | 8.031           | 8.283  | 8.46            | 8.952                   |         |
| ZNF690 | 3JGIA1ORqAJ94RLSdU | rs7048     | 3.31                         | 3.17                                  | -0.062               | 2.34                         | -33.2                         | 0.115  | 7.308  | 0.135                             | 7.11    | 7.217           | 7.279  | 7.386           | 8.053                   | Yes     |
| ZNF690 | 3JGIA1ORqAJ94RLSdU | rs9920879  | 7.42                         | 7.09                                  | -0.147               | 1.53                         | -13.5                         | 0.33   | 7.308  | 0.135                             | 7.11    | 7.217           | 7.279  | 7.386           | 8.053                   | Yes     |
| ZNF690 | 3JGIA1ORqAJ94RLSdU | rs6493084  | 7.42                         | 7.09                                  | -0.147               | 1.53                         | -5.64                         | 0.33   | 7.308  | 0.135                             | 7.11    | 7.217           | 7.279  | 7.386           | 8.053                   | Yes     |
| ZNF690 | 3JGIA1ORqAJ94RLSdU | rs12912744 | 7.35                         | 7.02                                  | -0.147               | 3.33                         | -3.17                         | 0.225  | 7.308  | 0.135                             | 7.11    | 7.217           | 7.279  | 7.386           | 8.053                   | Yes     |
| ZNF690 | 3JGIA1ORqAJ94RLSdU | rs3809482  | 7.42                         | 7.09                                  | 0.147                | 1.53                         | -0.31                         | 0.33   | 7.308  | 0.135                             | 7.11    | 7.217           | 7.279  | 7.386           | 8.053                   | Yes     |
| ZNF696 | INm_u3iKi_iJ6_u6Kg | rs7464066  | 10.04                        | 9.58                                  | 0.2                  | 4.27                         | -43.14                        | 0.41   | 8.433  | 0.24                              | 7.772   | 8.274           | 8.452  | 8.59            | 9.261                   |         |
| ZNF696 | INm_u3iKi_iJ6_u6Kg | rs7815716  | 10.04                        | 9.58                                  | -0.2                 | 4.27                         | -36.24                        | 0.41   | 8.433  | 0.24                              | 7.772   | 8.274           | 8.452  | 8.59            | 9.261                   |         |
| ZNF696 | INm_u3iKi_iJ6_u6Kg | rs10090179 | 10.04                        | 9.58                                  | -0.2                 | 4.27                         | -34.54                        | 0.41   | 8.433  | 0.24                              | 7.772   | 8.274           | 8.452  | 8.59            | 9.261                   |         |
| ZNF696 | INm_u3iKi_iJ6_u6Kg | rs6651422  | 9.35                         | 8.92                                  | 0.187                | 3.72                         | -3.28                         | 0.44   | 8.433  | 0.24                              | 7.772   | 8.274           | 8.452  | 8.59            | 9.261                   |         |
| ZNF696 | INm_u3iKi_iJ6_u6Kg | rs1122242  | 8.69                         | 8.30                                  | 0.173                | 3.55                         | 7.32                          | 0.415  | 8.433  | 0.24                              | 7.772   | 8.274           | 8.452  | 8.59            | 9.261                   |         |
| ZNF772 | i5.uI5D0pzfrOLxO9E | rs2360764  | 4.72                         | 4.51                                  | 0.096                | 0.17                         | 2.12                          | 0.375  | 7.423  | 0.18                              | 7.12    | 7.298           | 7.405  | 7.527           | 8.027                   |         |
| ZNF772 | i5.uI5D0pzfrOLxO9E | rs2074058  | 6.78                         | 6.48                                  | 0.137                | 1.61                         | 3.96                          | 0.2825 | 7.423  | 0.18                              | 7.12    | 7.298           | 7.405  | 7.527           | 8.027                   |         |
| ZNF772 | i5.uI5D0pzfrOLxO9E | rs2285609  | 4.72                         | 4.51                                  | -0.096               | 0.17                         | 2.12                          | 0.375  | 7.423  | 0.18                              | 7.12    | 7.298           | 7.405  | 7.527           | 8.027                   |         |
| ZNF772 | i5.uI5D0pzfrOLxO9E | rs2285611  | 4.72                         | 4.51                                  | -0.096               | 0.17                         | 3.14                          | 0.375  | 7.423  | 0.18                              | 7.12    | 7.298           | 7.405  | 7.527           | 8.027                   |         |
| ZNF772 | i5.uI5D0pzfrOLxO9E | rs2074071  | 3.96                         | 3.79                                  | 0.079                | 0.09                         | 14.64                         | 0.315  | 7.423  | 0.18                              | 7.12    | 7.298           | 7.405  | 7.527           | 8.027                   |         |
| ZNF772 | i5.uI5D0pzfrOLxO9E | rs2360761  | 3.96                         | 3.79                                  | 0.079                | 0.09                         | 18.85                         | 0.315  | 7.423  | 0.18                              | 7.12    | 7.298           | 7.405  | 7.527           | 8.027                   |         |
| ZNF772 | i5.uI5D0pzfrOLxO9E | rs6510089  | 5.68                         | 5.43                                  | -0.116               | 1.33                         | 46.83                         | 0.3417 | 7.423  | 0.18                              | 7.12    | 7.298           | 7.405  | 7.527           | 8.027                   |         |
| ZNF80  | cf6X3slqn3Ulk7Ry.0 | rs3732781  | 5.79                         | 5.54                                  | 0.115                | 1.56                         | -1.34                         | 0.2675 | 7.385  | 0.166                             | 7.121   | 7.272           | 7.351  | 7.464           | 8.1                     |         |
| ZNF80  | cf6X3slqn3Ulk7Ry.0 | rs1354350  | 7.48                         | 7.15                                  | -0.149               | 3.16                         | 3.92                          | 0.304  | 7.385  | 0.166                             | 7.121   | 7.272           | 7.351  | 7.464           | 8.1                     |         |
| ZNF818 | uAtOPu9LuV91UqUek  | rs8103620  | 4.07                         | 3.90                                  | 0.079                | 0.69                         | -18.29                        | 0.4725 | 7.273  | 0.114                             | 7.111   | 7.196           | 7.255  | 7.324           | 7.987                   |         |
| ZNF83  | cbk58J.xUpNAFoE0So | rs8108275  | 3.58                         | 3.43                                  | 0.069                | 2.99                         | -0.07                         | 0.1111 | 10.497 | 0.617                             | 7.408   | 10.116          | 10.537 | 10.938          | 12.134                  |         |
| ZNF83  | cbk58J.xUpNAFoE0So | rs12978409 | 3.36                         | 3.22                                  | -0.065               | 2.17                         | 42.57                         | 0.1    | 10.497 | 0.617                             | 7.408   | 10.116          | 10.537 | 10.938          | 12.134                  |         |
| ZNF84  | 6AhHqBH5V0syx7QqCU | rs7970251  | 7.01                         | 6.72                                  | 0.144                | 3.37                         | 1.7                           | 0.4475 | 9.299  | 0.302                             | 8.252   | 9.131           | 9.292  | 9.466           | 10.206                  |         |
| ZNF84  | 6AhHqBH5V0syx7QqCU | rs905227   | 6.88                         | 6.57                                  | -0.142               | 3.13                         | -7.29                         | 0.4447 | 9.299  | 0.302                             | 8.252   | 9.131           | 9.292  | 9.466           | 10.206                  |         |
| ZNF84  | 6AhHqBH5V0syx7QqCU | rs3805728  | 3.39                         | 3.24                                  | 0.065                | 2.05                         | -2.65                         | 0.235  | 9.299  | 0.302                             | 8.252   | 9.131           | 9.292  | 9.466           | 10.206                  |         |

| Symbol  | Lumi nuID          | SNP        | Population-based             | Population-based                      | % Variance Explained | Family-based                 | Distance from transcript (kb) | MAF    | Mean   | Transcript abundance (log2 scale) |         |                 |        |                 | SNP mapping under probe |
|---------|--------------------|------------|------------------------------|---------------------------------------|----------------------|------------------------------|-------------------------------|--------|--------|-----------------------------------|---------|-----------------|--------|-----------------|-------------------------|
|         |                    |            | association p-value (-log10) | association p-value (-log10), GC adj. |                      | association p-value (-log10) |                               |        |        | Standard Deviation                | Minimum | 25th percentile | Median | 75th percentile |                         |
| ZNF84   | 6AhHqBH5V0syx7QqCU | rs2259444  | 4.34                         | 4.15                                  | -0.083               | 2.53                         | 6.31                          | 0.4025 | 9.299  | 0.302                             | 8.252   | 9.131           | 9.292  | 9.466           | 10.206                  |
| ZNF84   | 6AhHqBH5V0syx7QqCU | rs595241   | 5.7                          | 5.45                                  | -0.114               | 2.72                         | 18.39                         | 0.465  | 9.299  | 0.302                             | 8.252   | 9.131           | 9.292  | 9.466           | 10.206                  |
| ZNF84   | 6AhHqBH5V0syx7QqCU | rs3749826  | 4.39                         | 4.20                                  | -0.087               | 2.75                         | 20.71                         | 0.3075 | 9.299  | 0.302                             | 8.252   | 9.131           | 9.292  | 9.466           | 10.206                  |
| ZNF93   | iR4i94Hx3sFNUB11Sk | rs13344370 | 3.96                         | 3.79                                  | 0.077                | 3.28                         | 9.26                          | 0.2275 | 7.367  | 0.105                             | 7.111   | 7.298           | 7.354  | 7.421           | 7.701                   |
| ZNF93   | iR4i94Hx3sFNUB11Sk | rs6511061  | 4.61                         | 4.41                                  | -0.094               | 2.18                         | 9.06                          | 0.09   | 7.367  | 0.105                             | 7.111   | 7.298           | 7.354  | 7.421           | 7.701                   |
| ZNFN1A1 | 6VYPhBUB3UhNFB7VeY | rs6963357  | 3.73                         | 3.57                                  | 0.073                | 1.14                         | -18.94                        | 0.35   | 10.93  | 0.811                             | 7.7     | 10.508          | 10.888 | 11.376          | 13.216                  |
| ZNFN1A1 | 6VYPhBUB3UhNFB7VeY | rs7780012  | 3.92                         | 3.75                                  | 0.075                | 0.36                         | -5.51                         | 0.17   | 10.93  | 0.811                             | 7.7     | 10.508          | 10.888 | 11.376          | 13.216                  |
| ZNFN1A1 | 6VYPhBUB3UhNFB7VeY | rs7809377  | 6.46                         | 6.18                                  | 0.129                | 2.72                         | -1.5                          | 0.155  | 10.93  | 0.811                             | 7.7     | 10.508          | 10.888 | 11.376          | 13.216                  |
| ZNFN1A1 | 6VYPhBUB3UhNFB7VeY | rs6954833  | 6.65                         | 6.36                                  | 0.135                | 2.4                          | -12.11                        | 0.24   | 10.93  | 0.811                             | 7.7     | 10.508          | 10.888 | 11.376          | 13.216                  |
| ZNFN1A1 | 6VYPhBUB3UhNFB7VeY | rs10248903 | 7.12                         | 6.80                                  | 0.145                | 2.5                          | -8.88                         | 0.255  | 10.93  | 0.811                             | 7.7     | 10.508          | 10.888 | 11.376          | 13.216                  |
| ZNFN1A1 | 6VYPhBUB3UhNFB7VeY | rs6952409  | 10.3                         | 9.83                                  | 0.209                | 2.84                         | -7.62                         | 0.2337 | 10.93  | 0.811                             | 7.7     | 10.508          | 10.888 | 11.376          | 13.216                  |
| ZNFN1A1 | 6VYPhBUB3UhNFB7VeY | rs11980379 | 8.45                         | 8.07                                  | 0.173                | 2.67                         | -0.58                         | 0.31   | 10.93  | 0.811                             | 7.7     | 10.508          | 10.888 | 11.376          | 13.216                  |
| ZNFN1A1 | 6VYPhBUB3UhNFB7VeY | rs4132601  | 8.45                         | 8.07                                  | 0.173                | 2.67                         | 0.04                          | 0.31   | 10.93  | 0.811                             | 7.7     | 10.508          | 10.888 | 11.376          | 13.216                  |
| ZNFN1A1 | 6VYPhBUB3UhNFB7VeY | rs6944602  | 10.27                        | 9.80                                  | 0.21                 | 2.65                         | 3.19                          | 0.2296 | 10.93  | 0.811                             | 7.7     | 10.508          | 10.888 | 11.376          | 13.216                  |
| ZNFN1A1 | 6VYPhBUB3UhNFB7VeY | rs7792486  | 16.42                        | 15.65                                 | -0.317               | 2.8                          | 15.75                         | 0.0525 | 10.93  | 0.811                             | 7.7     | 10.508          | 10.888 | 11.376          | 13.216                  |
| eIF2A   | cSP6RcdeVRikRRgEe0 | rs13072593 | 3.52                         | 3.37                                  | 0.065                | 0.99                         | -13.54                        | 0.2475 | 11.402 | 0.345                             | 9.842   | 11.229          | 11.431 | 11.637          | 12.03                   |
| eIF2A   | cSP6RcdeVRikRRgEe0 | rs7631671  | 7.14                         | 6.82                                  | -0.133               | 3.5                          | -9.26                         | 0.1608 | 11.402 | 0.345                             | 9.842   | 11.229          | 11.431 | 11.637          | 12.03                   |
| eIF2A   | cSP6RcdeVRikRRgEe0 | rs2868945  | 4.87                         | 4.66                                  | 0.09                 | 1.79                         | 20.39                         | 0.1281 | 11.402 | 0.345                             | 9.842   | 11.229          | 11.431 | 11.637          | 12.03                   |
| raptor  | HZO6dbQ0vRZTcQSSal | rs12949279 | 3.97                         | 3.80                                  | 0.078                | 2.5                          | 39.34                         | 0.4275 | 7.171  | 0.085                             | 7.101   | 7.128           | 7.144  | 7.18            | 7.727                   |
| raptor  | HZO6dbQ0vRZTcQSSal | rs12940622 | 4.01                         | 3.84                                  | 0.079                | 2.29                         | 96.5                          | 0.4275 | 7.171  | 0.085                             | 7.101   | 7.128           | 7.144  | 7.18            | 7.727                   |
