# Supplementary material
Source: PubMed Central journal article supplement (PMC2972694)
Supplement: supp_ddq392_ddq392supp_table2.pdf [file supp_ddq392_ddq392supp_table2.pdf]

Supplementary Table 2: Disease –susceptibility genes with evidence of regulatory SNPs in CD4+ lymphocytes

| Gene     | eSNP       | eSNP association p-value | % Expression Variance Explained | Trait-associated SNP | Linkage Disequilibrium |       | Trait                                 | Trait-association p-value | PubMedID |
|----------|------------|--------------------------|---------------------------------|----------------------|------------------------|-------|---------------------------------------|---------------------------|----------|
|          |            |                          |                                 |                      | D'                     | r2    |                                       |                           |          |
| ABCC4    | rs2487566  | 3.65E-05                 | -0.093                          | rs1926657            | 0.482                  | 0.045 | Breast cancer                         | 2.00E-06                  | 17903305 |
| ABO      | rs657152   | 5.56E-04                 | -0.064                          | rs657152             | 1                      | 1     | Serum alkaline phosphatase            | 2.00E-30                  | 18940312 |
|          | rs505922   | 4.26E-05                 | -0.088                          | rs505922             | 1                      | 1     | TNF-alpha levels                      | 7.00E-40                  | 18464913 |
|          | rs11244079 | 4.96E-06                 | -0.107                          | rs507666             | NA                     | NA    | Venous thromboembolism                | 4.00E-15                  | 19278955 |
| ACP5     | rs3760780  | 2.92E-07                 | -0.134                          | rs7253363            | 1                      | 0.033 | Soluble ICAM-1                        | 5.00E-29                  | 18604267 |
| ADCY3    | rs10182181 | 5.38E-08                 | -0.151                          | rs6733301            | 0.803                  | 0.094 | Multiple sclerosis (severity)         | 9.00E-06                  | 19010793 |
| AFF3     | rs6706188  | 2.26E-08                 | -0.151                          | rs9653442            | 0.946                  | 0.235 | Height                                | 8.00E-07                  | 18391951 |
| ALPL     | rs10917023 | 3.16E-05                 | 0.091                           | rs4654748            | NA                     | NA    | Type 1 diabetes                       | 5.00E-06                  | 17554260 |
|          |            |                          |                                 | rs1780324            | NA                     | NA    | Folate pathway vitamins Liver enzymes | 8.00E-18                  | 19303062 |
|          |            |                          |                                 | rs7333181            | NA                     | NA    | 7.00E-15                              | 18940312                  |          |
| ARHGEF7  | rs2477471  | 7.16E-05                 | -0.083                          | rs4773330            | NA                     | NA    | Menopause (age at onset)              | 3.00E-08                  | 19448619 |
| ATG16L1  | rs11894529 | 3.30E-04                 | -0.067                          | rs2241880            | 0.912                  | 0.321 | Serum bilirubin levels                | 8.00E-06                  | 19414484 |
|          |            |                          |                                 | rs10210302           | NA                     | NA    | Crohn's disease                       | 1.00E-13                  | 17435756 |
|          |            |                          |                                 | rs3828309            | NA                     | NA    | 5.00E-14                              | 17554300                  |          |
|          |            |                          |                                 | rs10919071           | 1                      | 1     | 2.00E-32                              | 18587394                  |          |
| ATP1B1   | rs10919071 | 3.51E-24                 | 0.458                           | rs10919071           | 1                      | 1     | QT interval                           | 1.00E-15                  | 19305409 |
| ATXN3    | rs17127945 | 4.29E-04                 | 0.065                           | rs7153027            | 1                      | 0.313 | Height                                | 1.00E-10                  | 18391951 |
|          |            |                          |                                 | rs8007661            | NA                     | NA    | 6.00E-10                              | 18391950                  |          |
| B3GALT4  | rs9277965  | 3.76E-06                 | -0.128                          | rs2254287            | NA                     | NA    | LDL cholesterol                       | 5.00E-08                  | 18193043 |
| BCR      | rs2156921  | 1.11E-05                 | 0.1                             | rs5751614            | 0.536                  | 0.167 | Height                                | 6.00E-06                  | 18391951 |
| BDNF     | rs10835211 | 1.06E-05                 | 0.097                           | rs925946             | 0.97                   | 0.711 | Body mass index, Weight               | 9.00E-10                  | 19079260 |
|          |            |                          |                                 | rs7481311            | NA                     | NA    | 8.00E-06                              |                           |          |
|          |            |                          |                                 | rs6265               | 1                      | 0.091 | 5.00E-10                              |                           |          |
| BLK      | rs13277113 | 2.83E-07                 | 0.136                           | rs13277113           | 1                      | 1     | SLE                                   | 1.00E-10                  | 18204098 |
| BRDG1    | rs3775867  | 1.54E-05                 | -0.097                          | rs2242330            | 1                      | 0.03  | Parkinson's disease                   | 2.00E-06                  | 17052657 |
| C1QTNF4  | rs10838738 | 7.36E-08                 | -0.151                          | rs10838738           | 1                      | 1     | Body mass index                       | 5.00E-09                  | 19079261 |
| C12orf43 | rs2254779  | 6.22E-10                 | -0.2                            | rs2259816            | 0.793                  | 0.03  | Coronary artery disease               | 5.00E-07                  | 19198612 |
| C16orf75 | rs7191700  | 2.15E-16                 | 0.311                           | rs1169313            | 0.793                  | 0.03  | Plasma levels of liver enzymes        | 2.00E-10                  | 18940312 |
|          |            |                          |                                 | rs416603             | 0.822                  | 0.513 | Type 1 diabetes                       | 3.00E-06                  | 18978792 |
| C1QTNF6  | rs12170612 | 1.98E-04                 | -0.073                          | rs229541             | 0.089                  | 0.002 | Type 1 diabetes                       | 2.00E-08                  | 18978792 |
| CAMK4    | rs7709420  | 1.76E-05                 | -0.098                          | rs10491334           | 0.247                  | 0.005 | Blood pressure                        | 2.00E-07                  | 19430480 |
| CCL20    | rs11694155 | 1.71E-08                 | -0.161                          | rs7591163            | 0.446                  | 0.013 | Blood pressure                        | 4.00E-06                  | 17903302 |
| CDKAL1   | rs10946439 | 6.51E-05                 | -0.09                           | rs6908425            | NA                     | NA    | Crohn's disease                       | 9.00E-10                  | 18587394 |
|          |            |                          |                                 | rs7756992            | NA                     | NA    | Type 2 diabetes                       | 8.00E-09                  | 17460697 |
|          |            |                          |                                 | rs7754840            | NA                     | NA    | 4.00E-11                              | 17463246                  |          |
|          |            |                          |                                 | NA                   | NA                     | NA    | 4.00E-11                              | 17463248                  |          |
|          |            |                          |                                 | rs10946398           | NA                     | NA    | 4.00E-11                              | 17463249                  |          |
|          |            |                          |                                 | rs9465871            | NA                     | NA    | 3.00E-07                              | 17554300                  |          |
|          |            |                          |                                 | rs6931514            | NA                     | NA    | 1.00E-11                              | 18372903                  |          |
|          |            |                          |                                 | rs4712524            | NA                     | NA    | 3.00E-10                              | 18711366                  |          |
|          |            |                          |                                 | rs4712523            | NA                     | NA    | 7.00E-20                              | 19401414                  |          |
|          |            |                          |                                 | rs8034191            | 0.966                  | 0.429 | COPD                                  | 1.00E-10                  | 19300482 |
| CHRNA5   | rs2292117  | 7.02E-08                 | -0.154                          | rs8034191            | 0.966                  | 0.429 | Lung cancer                           | 3.00E-18                  | 18385676 |
|          |            |                          |                                 |                      |                        |       | 5.00E-20                              | 18385738                  |          |
|          |            |                          |                                 |                      |                        |       | 1.00E-08                              | 18780872                  |          |
|          |            |                          |                                 |                      |                        |       | 6.00E-20                              | 18385739                  |          |
| CLECL1   | rs3764021  | 1.04E-09                 | -0.182                          | rs3764021            | 1                      | 1     | Nicotine dependence                   | 5.00E-08                  | 17554300 |
|          |            |                          |                                 |                      |                        |       | 2.00E-11                              | 19430480                  |          |
| CLYBL    | rs4763879  | 2.43E-05                 | -0.094                          | rs4763879            | 1                      | 1     | Type 1 diabetes                       | 5.00E-08                  | 17554300 |
|          |            |                          |                                 |                      |                        |       | 2.00E-11                              | 19430480                  |          |
| COBL     | rs7982561  | 3.45E-04                 | 0.071                           | rs7992643            | NA                     | NA    | ADHD                                  | 5.00E-06                  | 18821565 |
| COG6     | rs2329674  | 6.42E-04                 | 0.062                           | rs4948088            | NA                     | NA    | Type 1 diabetes                       | 4.00E-08                  | 19430480 |
| COG6     | rs3812882  | 2.64E-05                 | 0.097                           | rs7993214            | 0.864                  | 0.258 | Psoriasis                             | 2.00E-06                  | 18369459 |
| CUBN     | rs7916688  | 6.43E-04                 | 0.061                           | rs11254363           | 0.25                   | 0.01  | Folate pathway vitamins               | 1.00E-06                  | 19303062 |
| DCTN5    | rs420259   | 6.41E-07                 | 0.127                           | rs420259             | 1                      | 1     | Bipolar disorder                      | 6.00E-08                  | 17554300 |

| Gene     | eSNP       | eSNP association p-value | % Expression Variance Explained | Trait-associated SNP | Linkage Disequilibrium |       | Trait                                     | Trait-association p-value | PubMedID |
|----------|------------|--------------------------|---------------------------------|----------------------|------------------------|-------|-------------------------------------------|---------------------------|----------|
|          |            |                          |                                 |                      | D'                     | r2    |                                           |                           |          |
| DGKE     | rs970718   | 9.92E-05                 | -0.079                          | rs4794665            | 1                      | 0.151 | Height                                    | 1.00E-07                  | 18391951 |
| DGKQ     | rs11724804 | 1.79E-19                 | -0.356                          | rs1564282            | 1                      | 0.089 | Parkinson disease (familial)              | 7.00E-07                  | 18985386 |
| DOCK7    | rs10889353 | 1.57E-05                 | -0.099                          | rs10889353           | 1                      | 1     | Triglycerides                             | 3.00E-07                  | 19060906 |
|          | rs1167998  | 1.97E-05                 | -0.098                          | rs1167998            | 1                      | 1     | LDL and total cholesterol                 | 4.00E-12                  | 19060911 |
| DOT1L    | rs10407022 | 2.62E-04                 | -0.07                           | rs12986413           | 0.13                   | 0.003 | Triglycerides                             | 2.00E-12                  | 19060911 |
| EDG7     | rs12567433 | 3.84E-05                 | -0.095                          | rs1983853            | NA                     | NA    | Height                                    | 3.00E-08                  | 18391950 |
| EDN3     | rs259956   | 6.73E-05                 | -0.086                          | rs16982520           | 0.089                  | 0.001 | Type 1 diabetes                           | 2.00E-06                  | 18840781 |
| EPS8     | rs3748299  | 3.22E-05                 | -0.094                          | rs17415853           | NA                     | NA    | Hypertension                              | 2.00E-07                  | 19430479 |
| FADS1    | rs174546   | 1.32E-05                 | 0.093                           | rs174546             | 1                      | 1     | Serum Ferritin level                      | 7.00E-07                  | 18464913 |
| FADS2    | rs174546   | 4.58E-06                 | 0.11                            | rs174546             | 1                      | 1     | LDL cholesterol                           | 1.00E-07                  | 19060910 |
| FAM113B  | rs214697   | 4.67E-05                 | 0.09                            | rs11610206           | 0.896                  | 0.119 | LDL cholesterol                           | 1.00E-07                  | 19060910 |
| FBLN5    | rs2284340  | 4.08E-07                 | -0.137                          | rs17153027           | 0.556                  | 0.191 | Alzheimer's disease                       | 3.00E-07                  | 19118814 |
| FLJ43752 | rs210138   | 3.73E-06                 | 0.111                           | rs210138             | 1                      | 1     | Height                                    | 1.00E-10                  | 18391951 |
| GATM     | rs1346268  | 3.44E-04                 | 0.067                           | rs2467853            | NA                     | NA    | Testicular germ cell tumor                | 1.00E-13                  | 19483681 |
| GSDML    | rs7216389  | 5.30E-05                 | 0.083                           | rs7216389            | 1                      | 1     | Renal function and chronic kidney disease | 6.00E-14                  | 19430482 |
|          | rs2872507  | 3.20E-05                 | 0.088                           | rs2872507            | 1                      | 1     | Asthma                                    | 9.00E-11                  | 17611496 |
|          | rs2290400  | 4.07E-06                 | 0.108                           | rs2290400            | 1                      | 1     | Crohn's disease                           | 5.00E-09                  | 18587394 |
| HERC2    | rs8039195  | 1.44E-04                 | -0.073                          | rs12913832           | NA                     | NA    | Type 1 diabetes                           | 6.00E-13                  | 19430480 |
|          | rs916977   |                          |                                 | rs916977             | 1                      | 0.858 | Black vs. blond hair color                | 4.00E-103                 | 18483556 |
| HLA-E    | rs2516649  | 3.59E-05                 | 0.092                           | rs2647044            | NA                     | NA    | Iris color                                | 1.00E-43                  | 18252221 |
| ICOSLG   | rs3788111  | 3.71E-07                 | 0.133                           | rs762421             | 0.53                   | 0.06  | Type 1 diabetes                           | 1.00E-16                  | 17632545 |
| IGLL1    | rs131429   | 6.93E-04                 | -0.065                          | rs5751614            | 0.05                   | 0.002 | Crohn's disease                           | 1.00E-09                  | 18587394 |
| IL16     | rs859      | 3.43E-10                 | 0.183                           | rs17172689           | 0.086                  | 0.006 | Height                                    | 6.00E-06                  | 18391951 |
| IL18R1   | rs1420101  | 6.88E-04                 | 0.064                           | rs1420101            | 1                      | 1     | Inattentive symptoms                      | 4.00E-06                  | 18821565 |
|          | rs12998521 | 1.23E-04                 | 0.081                           | rs13015714           | 1                      | 0.165 | Plasma eosinophil count                   | 5.00E-14                  | 19198610 |
| IL1RN    | rs17669228 | 6.93E-04                 | 0.063                           | rs6761276            | 0.07                   | 0.002 | Celiac disease                            | 4.00E-09                  | 18311140 |
| IL23R    | rs7517847  | 4.87E-04                 | 0.066                           | rs7517847            | 1                      | 1     | Serum IL1RA protein level                 | 7.00E-06                  | 18464913 |
|          | rs2201841  |                          |                                 | rs2201841            | 0.742                  | 0.196 | Crohn's disease                           | 3.00E-12                  | 17435756 |
|          | rs7506045  |                          |                                 | rs7506045            | 1                      | 0.015 | IBD                                       | 4.00E-13                  | 17068223 |
| IMPA2    | rs619671   | 3.20E-04                 | -0.069                          | rs8034191            | 1                      | 1     | Pсориаз                                   | 3.00E-08                  | 19169254 |
| IREB2    | rs8034191  | 2.87E-04                 | 0.07                            | rs8034191            | 1                      | 1     | Stroke                                    | 7.00E-07                  | 17434096 |
|          |            |                          |                                 |                      |                        |       | Lung cancer                               | 5.00E-20                  | 18385738 |
|          |            |                          |                                 |                      |                        |       |                                           | 3.00E-18                  | 18385676 |
|          |            |                          |                                 |                      |                        |       | COPD                                      | 1.00E-08                  | 18780872 |
| IRF5     | rs1874332  | 1.81E-13                 | -0.27                           | rs10488631           | 1                      | 0.107 |                                           | 1.00E-10                  | 19300482 |
|          | rs12537284 |                          |                                 | rs12537284           | NA                     | NA    | SLE                                       | 2.00E-11                  | 18204098 |
| KIAA1598 | rs10787735 | 2.66E-04                 | 0.068                           | rs740363             | 0.955                  | 0.311 |                                           | 4.00E-19                  | 18204446 |
|          | rs4776472  |                          |                                 | rs4776472            | NA                     | NA    | Heart failure                             | 9.00E-06                  | 17903304 |
| L3MBTL3  | rs6899976  | 9.74E-21                 | 0.373                           | rs6899976            | 1                      | 1     | Atrial fibrillation                       | 8.00E-06                  |          |
| LCORL    | rs13102976 | 4.70E-04                 | -0.067                          | rs16896068           | 1                      | 0.729 | Height                                    | 6.00E-06                  | 18391951 |
|          | rs6830062  |                          |                                 | rs6830062            | NA                     | NA    | Height                                    | 2.00E-13                  | 18391952 |
| LEPR     | rs1045895  | 5.10E-05                 | 0.086                           | rs1892534            | 0.596                  | 0.107 |                                           | 5.00E-09                  | 19343178 |
|          | rs12753193 |                          |                                 | rs12753193           | NA                     | NA    | C-reactive protein                        | 1.00E-10                  | 18391951 |
| LIG3     | rs16970468 | 1.51E-05                 | -0.098                          | rs2074518            | 0.787                  | 0.428 | Other metabolic traits                    | 7.00E-21                  | 18439548 |
| LIPC     | rs936960   | 6.90E-14                 | 0.268                           | rs3825776            | 1                      | 0.079 | QT interval                               | 4.00E-07                  | 19060910 |
|          | rs1532085  |                          |                                 | rs1532085            | 0.565                  | 0.032 | ALS                                       | 6.00E-12                  | 19305408 |
|          | rs1800588  |                          |                                 | rs1800588            | 0.191                  | 0.015 | HDL cholesterol                           | 9.00E-06                  | 18084291 |
|          | rs10468017 |                          |                                 | rs10468017           | 0.273                  | 0.004 |                                           | 2.00E-10                  | 19060910 |
|          | rs4775041  |                          |                                 | rs4775041            | 0.515                  | 0.014 |                                           | 1.00E-35                  | 19060911 |
|          | rs4775041  |                          |                                 | rs4775041            | 0.515                  | 0.014 |                                           | 2.00E-32                  | 18193044 |
|          | rs4775041  |                          |                                 | rs4775041            | 0.515                  | 0.014 |                                           | 8.00E-23                  | 19060906 |
| LOC51057 | rs959195   | 1.09E-06                 | 0.127                           | rs11683229           | 1                      | 0.041 | Phosphatidylethanoamine                   | 3.00E-20                  | 18193043 |
| LRRC16   | rs7764258  | 3.33E-04                 | -0.068                          | rs2274089            | 0.298                  | 0.001 | Serum IL-6 protein level                  | 1.00E-07                  | 19043545 |
| MEIS2    | rs8036552  | 2.16E-05                 | -0.098                          | rs8041675            | NA                     | NA    | Serum markers of iron status              | 6.00E-06                  | 18464913 |
|          |            |                          |                                 |                      |                        |       | Hyperactive-impulsive symptoms            | 3.00E-07                  | 19084217 |
|          |            |                          |                                 |                      |                        |       |                                           | 4.00E-06                  | 18821565 |

| Gene     | eSNP       | eSNP association p-value | % Expression Variance Explained | Trait-associated SNP | Linkage Disequilibrium |       | Trait                            | Trait-association p-value | PubMedID |
|----------|------------|--------------------------|---------------------------------|----------------------|------------------------|-------|----------------------------------|---------------------------|----------|
|          |            |                          |                                 |                      | D'                     | r2    |                                  |                           |          |
| MMEL1    | rs3890745  | 1.33E-06                 | 0.098                           | rs3890745            | 1                      | 1     | Rheumatoid arthritis             | 1.00E-07                  | 18794853 |
| MRPL42   | rs11107052 | 5.42E-04                 | -0.062                          | rs3825199            | 0.009                  | 0     | Height                           | 2.00E-07                  | 18391951 |
| MSRA     | rs555200   | 8.65E-04                 | 0.062                           | rs11775334           | 0.75                   | 0.359 | Hypertension                     | 4.00E-06                  | 19430479 |
| MT1F     | rs7189840  | 1.73E-17                 | 0.341                           | rs7209435            | NA                     | NA    | Height                           | 7.00E-07                  | 18391951 |
| MYT1L    | rs6759577  | 1.83E-10                 | 0.199                           | rs2241685            | NA                     | NA    | ADHD                             | 8.00E-06                  | 18839057 |
| NAPRT1   | rs2290416  | 2.97E-04                 | 0.068                           | rs2290416            | 1                      | 1     | ADHD                             | 9.00E-06                  | 18821565 |
| NCOA3    | rs1569438  | 7.07E-04                 | -0.064                          | rs6125048            | NA                     | NA    | ALL treatment response           | 2.00E-06                  | 19176441 |
| NCR3     | rs986475   | 3.34E-21                 | -0.373                          | rs2844479            | 0.378                  | 0.016 | Weight                           | 2.00E-08                  | 19079260 |
| NBPf3    | rs4654748  | 4.35E-07                 | -0.136                          | rs4654748            | 1                      | 1     | Vitamin B6                       | 8.00E-18                  | 19303062 |
|          | rs1780324  | 2.26E-10                 | -0.203                          | rs1780324            | 1                      | 1     | Alkaline phosphatase             | 7.00E-15                  | 18940312 |
|          | rs7298096  | 4.22E-10                 | 0.198                           | rs12425791           | 1                      | 0.276 | Stroke                           | 1.00E-09                  | 19369658 |
| NKX2-3   | rs10736142 | 4.42E-04                 | 0.066                           | rs10883365           | 0.973                  | 0.923 | Crohn's disease                  | 4.00E-10                  | 17554261 |
|          |            |                          |                                 |                      |                        |       |                                  | 6.00E-08                  | 17554300 |
|          |            |                          |                                 | rs11190140           | NA                     | NA    |                                  | 3.00E-16                  | 18587394 |
| NOD2     | rs7194886  | 2.48E-05                 | 0.092                           | rs5743289            | 1                      | 0.176 | Crohn's disease                  | 6.00E-17                  | 17804789 |
|          |            |                          |                                 |                      |                        |       |                                  | 4.00E-10                  | 18758464 |
|          |            |                          |                                 | rs17221417           | 1                      | 0.312 |                                  | 4.00E-11                  | 17554300 |
|          |            |                          |                                 | rs2066847            | NA                     | NA    |                                  | 3.00E-24                  | 18587394 |
| NRG1     | rs17646307 | 8.84E-07                 | -0.119                          | rs16879552           | 1                      | 0.002 | Hirschsprung's disease           | 2.00E-08                  | 19196962 |
|          |            |                          |                                 | rs10503887           | NA                     | NA    | Hip geometry                     | 2.00E-07                  | 17903296 |
|          |            |                          |                                 | rs4964805            | 1                      | 0.048 | ADHD                             | 5.00E-06                  | 18839057 |
| NT5DC3   | rs10861116 | 1.06E-08                 | -0.174                          | rs11243676           | 0.594                  | 0.011 | SLE                              | 3.00E-06                  | 18204098 |
| NTNG2    | rs7046350  | 7.78E-05                 | -0.084                          | rs11243676           | 0.594                  | 0.011 | SLE                              | 3.00E-06                  | 18204098 |
|          | rs7216389  | 1.63E-08                 | 0.165                           | rs7216389            | 1                      | 1     | Asthma                           | 9.00E-11                  | 17611496 |
|          | rs2872507  | 7.98E-09                 | 0.172                           | rs2872507            | 1                      | 1     | Crohn's disease                  | 5.00E-09                  | 18587394 |
| ORMDL3   | rs2290400  | 3.05E-09                 | 0.182                           | rs2290400            | 1                      | 1     | Type 1 diabetes                  | 6.00E-13                  | 19430480 |
|          | rs6695214  | 9.73E-05                 | 0.081                           | rs7538876            | 1                      | 0.413 | Basal cell carcinoma (cutaneous) | 4.00E-12                  | 18849993 |
| PADI6    | rs6695214  | 9.73E-05                 | 0.081                           | rs7538876            | 1                      | 0.413 | Basal cell carcinoma (cutaneous) | 4.00E-12                  | 18849993 |
| PEX1     | rs10488516 | 1.49E-05                 | 0.099                           | rs2282978            | 0.931                  | 0.223 | Height                           | 1.00E-08                  | 18391951 |
| PHTF1    | rs3827733  | 3.05E-05                 | 0.093                           | rs6679677            | 1                      | 0.042 | Type 1 diabetes                  | 8.00E-24                  | 17554260 |
| PITRM1   | rs1053000  | 6.04E-05                 | 0.089                           | rs2764980            | 0.096                  | 0.005 | ADHD                             | 9.00E-06                  | 18951430 |
| PLEK     | rs10496164 | 1.26E-05                 | 0.094                           | rs9309413            | 0.19                   | 0.008 | Serum metabolites                | 2.00E-09                  | 19043545 |
| PLEKHA7  | rs4757490  | 9.68E-06                 | 0.101                           | rs11024074           | 0.133                  | 0.015 | Diastolic blood pressure         | 1.00E-06                  | 19430479 |
|          |            |                          |                                 | rs381815             | NA                     | NA    | Systolic blood pressure          | 2.00E-09                  |          |
| POLR3B   | rs2077730  | 4.44E-05                 | 0.088                           | rs3891355            | 0.626                  | 0.104 | Cognitive performance            | 3.00E-06                  | 17903297 |
| POMC     | rs13428823 | 2.46E-07                 | 0.144                           | rs6733301            | 1                      | 0.078 | Height                           | 8.00E-07                  | 18391951 |
| PRKG2    | rs3733553  | 6.63E-04                 | -0.065                          | rs710841             | 0.328                  | 0.087 | Height                           | 2.00E-06                  | 18391951 |
|          |            |                          |                                 |                      |                        |       |                                  | 2.00E-08                  | 19343178 |
| PTCH1    | rs10512249 | 1.66E-06                 | -0.123                          | rs10512248           | 1                      | 0.308 | Height                           | 4.00E-11                  | 18391952 |
| PTER     | rs7909832  | 9.88E-57                 | -0.752                          | rs10508503           | NA                     | NA    | Obesity                          | 2.00E-07                  | 19151714 |
| PTPN1    | rs4602269  | 1.71E-05                 | -0.093                          | rs17696736           | NA                     | NA    | Type 1 diabetes                  | 2.00E-14                  | 17554300 |
| RAD51L1  | rs4902619  | 1.66E-06                 | 0.12                            | rs999737             | NA                     | NA    | Breast cancer                    | 2.00E-07                  | 19330030 |
| RASGEF1A | rs2503846  | 7.00E-04                 | -0.062                          | rs2742234            | 0.912                  | 0.093 | Hirschsprung's disease           | 4.00E-18                  | 19196962 |
| RBMS1    | rs1020732  | 3.01E-04                 | -0.07                           | rs10192369           | NA                     | NA    | ALS                              | 9.00E-06                  | 19451621 |
| RELN     | rs2906634  | 3.02E-04                 | 0.073                           | rs17157903           | NA                     | NA    | Multiple sclerosis (onset)       | 3.00E-06                  | 19010793 |
|          |            |                          |                                 | rs3914132            | NA                     | NA    | Otosclerosis                     | 2.00E-08                  | 19230858 |
|          |            |                          |                                 | rs7341475            | NA                     | NA    | Schizophrenia                    | 9.00E-07                  | 18282107 |
|          |            |                          |                                 | rs9836484            | NA                     | NA    | Schizophrenia (imaging)          | 4.00E-06                  | 19023125 |
| ROBO1    | rs1865862  | 5.53E-05                 | -0.088                          | rs9834373            | NA                     | NA    | Serum GP130 protein              | 4.00E-06                  | 18464913 |
|          |            |                          |                                 | rs6899976            | 0.064                  | 0.002 | Height                           | 6.00E-06                  | 18391951 |
| SAMD3    | rs7749850  | 1.03E-05                 | -0.103                          | rs6899976            | 0.064                  | 0.002 | Height                           | 6.00E-06                  | 18391951 |
| SAMM50   | rs6006467  | 3.49E-05                 | -0.089                          | rs2281135            | 1                      | 0.049 | Plasma levels of liver enzymes   | 8.00E-16                  | 18940312 |
| SLC17A3  | rs942379   | 7.82E-06                 | 0.105                           | rs1165205            | 1                      | 0.979 | Serum urate                      | 4.00E-29                  | 18834626 |
| SLC22A5  | rs2188962  | 2.42E-13                 | -0.261                          | rs2188962            | 1                      | 1     | Crohn's disease                  | 2.00E-18                  | 18587394 |
| SLC23A3  | rs17655123 | 3.25E-06                 | -0.111                          | rs1052483            | 0.836                  | 0.509 | Height                           | 1.00E-06                  | 18391951 |
| SP110    | rs1004868  | 1.84E-04                 | -0.077                          | rs13397985           | 0.686                  | 0.013 | Chronic lymphocytic leukemia     | 6.00E-10                  | 18758461 |
| SPACA1   | rs10455478 | 3.11E-04                 | 0.07                            | rs366676             | NA                     | NA    | Echocardiographic traits         | 2.00E-06                  | 17903301 |
| SPATA5L1 | rs1346268  | 1.68E-05                 | -0.098                          | rs2467853            | NA                     | NA    | Renal function                   | 6.00E-14                  | 19430482 |
| STK39    | rs9917256  | 2.01E-04                 | 0.074                           | rs6749447            | NA                     | NA    | Blood pressure                   | 2.00E-07                  | 19114657 |

| Gene   | eSNP       | eSNP association p-value | % Expression Variance Explained | Trait-associated SNP | Linkage Disequilibrium |       | Trait                        | Trait-association p-value | PubMedID |
|--------|------------|--------------------------|---------------------------------|----------------------|------------------------|-------|------------------------------|---------------------------|----------|
|        |            |                          |                                 |                      | D'                     | r2    |                              |                           |          |
| SUOX   | rs1701704  | 2.02E-06                 | 0.118                           | rs1701704            | 1                      | 1     | Type 1 diabetes              | 9.00E-10                  | 18198356 |
| SUPT3H | rs3799977  | 5.87E-13                 | -0.25                           | rs3799977            | 1                      | 1     | ADHD                         | 5.00E-06                  | 18839057 |
|        | rs9472409  | 3.83E-15                 | 0.292                           | rs9395066            | NA                     | NA    | Height                       | 8.00E-06                  | 18391951 |
| TAGLN  | rs7112513  | 2.47E-04                 | 0.068                           | rs7112513            | 1                      | 1     | Soluble transferrin receptor | 6.00E-09                  | 18464913 |
| TMEM4  | rs2066808  | 4.23E-04                 | 0.071                           | rs2066808            | 1                      | 1     | Psoriasis                    | 1.00E-09                  | 19169254 |
| TNIK   | rs12486818 | 6.86E-04                 | 0.062                           | rs2088885            | NA                     | NA    | Schizophrenia (imaging)      | 6.00E-06                  | 19023125 |
| TPCN2  | rs3750965  | 7.69E-10                 | -0.183                          | rs35264875           | NA                     | NA    | Blond vs. brown hair color   | 4.00E-30                  | 18488028 |
| TRIP11 | rs1051340  | 3.14E-04                 | 0.072                           | rs8007661            | NA                     | NA    | Height                       | 6.00E-10                  | 18391950 |
|        |            |                          |                                 | rs7153027            | NA                     | NA    |                              | 1.00E-10                  | 18391951 |
| TTC39B | rs11792305 | 4.38E-28                 | -0.481                          | rs471364             | 0.654                  | 0.072 | HDL cholesterol              | 3.00E-10                  | 19060906 |
| VAMP1  | rs2534721  | 2.23E-04                 | 0.074                           | rs10492096           | 1                      | 0.084 | Hip geometry                 | 3.00E-06                  | 17903296 |
| XKR6   | rs7832722  | 5.11E-05                 | -0.085                          | rs7819412            | 0.122                  | 0.006 | Triglycerides                | 3.00E-08                  | 19060906 |
| YEATS4 | rs6581889  | 7.91E-04                 | 0.062                           | rs11177669           | NA                     | NA    | Height                       | 3.00E-06                  | 18391951 |
| ZDHHC7 | rs12600202 | 7.63E-05                 | -0.078                          | rs2326458            | 0.323                  | 0.002 | Height                       | 8.00E-07                  | 18391951 |
| ZNF365 | rs10821993 | 2.32E-06                 | -0.117                          | rs10995271           | NA                     | NA    | Crohn's disease              | 4.00E-20                  | 18587394 |
| ZNF544 | rs431093   | 6.29E-04                 | 0.063                           | rs260461             | 0.689                  | 0.051 | ADHD                         | 8.00E-06                  | 18821565 |

SNPs in red denote variants with both eSNP and disease associations. Pairwise linkage disequilibrium metrics derived using HapMap (release 21) CEU data. Values of % variance explained less than zero denote that minor allele is associated with lower levels of transcript abundance as compared to the minor allele. P-values are FDR and Genomic Inflation Factor (lambda=1.05) adjusted.
